# Supplementary material for: Forniceal deep brain stimulation induces gene expression and splicing changes that promote neurogenesis and plasticity
Source: eLife. 2018 Mar 23;7:e34031. doi: 10.7554/eLife.34031 (PMC5906096; doi:10.7554/eLife.34031)
Supplement: Figure 1—source data 1. [file elife-34031-fig1-data1.xlsx]

## Sheet: WT-DBS_WT-Sham
gene	chr	start	end	GeneName	Gene_Type	Gene_Status	length	baseMean	Log2ShrinkFC	Log2MeanFC	lfcSE	stat	pvalue	padj	norm.counts.WT_Sample1_sham	norm.counts.WT_Sample2_sham	norm.counts.WT_Sample4_sham	norm.counts.WT_Sample1_DBS	norm.counts.WT_Sample2_DBS	norm.counts.WT_Sample3_DBS	norm.counts.WT_Sample4_DBS
ENSMUSG00000001138.13	chr1	36511867	36528237	Cnnm3	protein_coding	KNOWN	16371	1918.98	-0.624522	-0.628952	0.0876655	-7.12392	1.04896e-12	1.86857e-11	2413	2409.46	2390.99	1545.37	1535.32	1612.41	1526.31
ENSMUSG00000001143.13	chr1	36419871	36445271	Lman2l	protein_coding	KNOWN	25401	4557.44	-0.194013	-0.206638	0.103636	-1.87205	0.0611997	0.115493	5132.07	4602.11	5066.78	4731.99	4318.94	4091.08	3959.09
ENSMUSG00000001305.5	chr1	186720978	186749358	Rrp15	protein_coding	KNOWN	28381	688.933	-0.228193	-0.216896	0.14514	-1.57223	0.115897	0.194599	777.032	743.252	725.658	790.74	672.168	502.059	611.622
ENSMUSG00000001674.11	chr1	121553835	121567989	Ddx18	protein_coding	KNOWN	14155	919.97	-0.518934	-0.51572	0.124912	-4.15441	3.26123e-05	0.000159166	1058.32	1166.15	1107.74	977.529	845.011	665.196	619.85
ENSMUSG00000002459.17	chr1	4909576	5070285	Rgs20	protein_coding	KNOWN	160710	1137.01	0.383882	0.407329	0.100506	3.8195	0.000133722	0.000566818	977.487	975.701	921.872	1247.75	1196.03	1377.18	1263.01
ENSMUSG00000002881.14	chr1	52457294	52500679	Nab1	protein_coding	KNOWN	43386	3046.57	1.19634	1.21563	0.103727	11.5335	8.94533e-31	7.69446e-29	1731.89	1728.72	1745.22	3727.06	3927.38	4594.41	3871.32
ENSMUSG00000003134.10	chr1	39371492	39478755	Tbc1d8	protein_coding	KNOWN	107264	738.399	-0.0448898	-0.0412379	0.117581	-0.381777	0.702627	0.783778	731.768	780.366	739.319	669.95	790.597	758.779	698.017
ENSMUSG00000003135.15	chr1	39534992	39546889	Cnot11	protein_coding	KNOWN	11898	1555.6	-0.375083	-0.361388	0.110096	-3.40687	0.000657136	0.00234011	1820.26	1796.11	1727.01	1581.48	1512.91	1208.99	1242.44
ENSMUSG00000003458.12	chr1	172066013	172082795	Ncstn	protein_coding	KNOWN	16783	3067.41	-0.314318	-0.329868	0.0833497	-3.77108	0.000162545	0.00067287	3492.87	3372.47	3553.78	2682.29	2831.64	2796.1	2742.7
ENSMUSG00000003464.13	chr1	172126755	172136493	Pex19	protein_coding	KNOWN	9739	4642.06	0.0291813	0.0302654	0.0967004	0.301771	0.762827	0.829941	4514.54	4661.68	4583.28	4535.24	4675.3	4383.21	5141.19
ENSMUSG00000003721.14	chr1	121304353	121332589	Insig2	protein_coding	KNOWN	28237	3703.52	0.131001	0.137103	0.0987286	1.32688	0.184548	0.282714	3509.04	3496.51	3506.18	3369.67	3748.14	4000.03	4295.07
ENSMUSG00000004031.13	chr1	158245269	158356326	Brinp2	protein_coding	KNOWN	111058	4727.15	-0.223605	-0.240079	0.137835	-1.62227	0.104746	0.179267	5291.58	4825.77	5425.67	4581.31	4987.91	3356.33	4621.45
ENSMUSG00000004110.14	chr1	154390731	154884501	Cacna1e	protein_coding	KNOWN	493771	45764.8	-0.0281909	-0.0379697	0.114934	-0.245279	0.80624	0.863417	47888.2	43754.2	47720.4	42606.6	42013.7	54960.9	41409.3
ENSMUSG00000004364.14	chr1	80264923	80340480	Cul3	protein_coding	KNOWN	75558	13397.3	0.795332	0.806135	0.0816982	9.73499	2.1383e-22	1.06703e-20	9498.97	9295.04	9356.98	15093.8	16275	16874	17387.4
ENSMUSG00000004451.14	chr1	119470305	119504794	Ralb	protein_coding	KNOWN	34490	763.425	0.20504	0.219521	0.113046	1.81377	0.0697128	0.128217	694.048	714.928	684.677	866.701	891.956	703.135	788.527
ENSMUSG00000004768.14	chr1	33719887	33742564	Rab23	protein_coding	KNOWN	22678	1759.79	-0.57566	-0.56882	0.109274	-5.26804	1.37887e-07	1.10204e-06	2109.09	2251.24	2126.89	1750.84	1564.12	1284.87	1231.47
ENSMUSG00000004880.11	chr1	181815335	181843046	Lbr	protein_coding	KNOWN	27712	888.382	-0.0585246	-0.048366	0.111729	-0.523808	0.600412	0.701049	918.212	915.147	882.96	910.285	785.263	868.802	938.004
ENSMUSG00000005338.13	chr1	173333258	173367695	Cadm3	protein_coding	KNOWN	34438	23188.3	0.0323958	0.0266843	0.0832121	0.389316	0.697042	0.779336	23309.9	22315.1	23205.8	22483.2	23995.3	22483.9	24525.2
ENSMUSG00000005501.14	chr1	87945119	88008551	Usp40	protein_coding	KNOWN	63433	2013.77	-0.157964	-0.158421	0.123617	-1.27785	0.201303	0.302693	2155.43	2147.71	2119.85	1932.64	1886.34	2215.63	1638.76
ENSMUSG00000005674.9	chr1	171216011	171222514	Tomm40l	protein_coding	KNOWN	6504	767.574	-0.0164362	-0.0184907	0.117817	-0.139507	0.88905	0.925242	796.431	746.182	776.988	800.702	732.983	695.547	824.182
ENSMUSG00000005886.14	chr1	13139105	13374083	Ncoa2	protein_coding	KNOWN	234979	7117.27	-0.22115	-0.215756	0.0835448	-2.64709	0.00811881	0.0208061	7506.28	8080.06	7606.37	7055.65	6496.56	6693.69	6382.27
ENSMUSG00000006005.17	chr1	150392838	150449935	Tpr	protein_coding	KNOWN	57098	9519.47	-0.199603	-0.2038	0.0838366	-2.38086	0.0172722	0.0396041	10329.9	10203.4	10350	9323.26	9075.33	9052.23	8302.16
ENSMUSG00000006010.14	chr1	150361305	150393080	BC003331	protein_coding	KNOWN	31776	3485.17	-0.0326949	-0.0357278	0.0843188	-0.387754	0.698198	0.780124	3524.12	3525.81	3553.78	3424.47	3475	3308.28	3584.71
ENSMUSG00000006014.16	chr1	150449412	150466165	Prg4	protein_coding	KNOWN	16754	53.1658	-0.620916	-0.786979	0.324083	-1.91591	0.055376	0.106019	78.6731	41.0205	90.2416	33.622	60.8152	41.7328	26.0557
ENSMUSG00000006299.13	chr1	74279840	74284738	Aamp	protein_coding	KNOWN	4899	5837.68	0.244318	0.244201	0.0865596	2.82254	0.00476451	0.0131663	5229.07	5302.38	5311.84	6117.96	6427.2	5913.42	6561.91
ENSMUSG00000006301.17	chr1	74288247	74305622	Tmbim1	protein_coding	KNOWN	17376	1322.13	0.452352	0.455319	0.100709	4.49166	7.06688e-06	4.00088e-05	1105.73	1057.74	1108.98	1356.09	1417.95	1680.7	1527.68
ENSMUSG00000006304.14	chr1	74236084	74268209	Arpc2	protein_coding	KNOWN	32126	29521.5	1.02289	1.06709	0.128386	7.96731	1.62164e-15	4.18001e-14	18157.3	18107.6	18208.5	28145.4	35371	45434.4	43226.3
ENSMUSG00000006403.12	chr1	171250421	171260637	Adamts4	protein_coding	KNOWN	10217	446.223	0.505448	0.516826	0.155518	3.2501	0.00115366	0.00382971	384.744	322.304	367.176	555.386	445.978	598.171	449.803
ENSMUSG00000006411.12	chr1	171370099	171388598	Nectin4	protein_coding	KNOWN	18500	290.516	-0.397665	-0.413586	0.152298	-2.61109	0.00902549	0.0228002	322.236	349.651	344.408	255.278	316.879	217.517	227.644
ENSMUSG00000006412.10	chr1	171345670	171359254	Pfdn2	protein_coding	KNOWN	13585	2754.97	0.381292	0.387487	0.0952686	4.00228	6.27346e-05	0.000287269	2361.27	2322.54	2343.8	2906.44	2988.48	2966.83	3395.46
ENSMUSG00000006576.16	chr1	75546266	75562172	Slc4a3	protein_coding	KNOWN	15907	8319.44	0.142304	0.157183	0.092231	1.54291	0.122854	0.203892	7772.47	7998.99	7646.53	7799.07	8494.92	9198.93	9325.18
ENSMUSG00000007097.14	chr1	172271709	172298064	Atp1a2	protein_coding	KNOWN	26356	60382.4	0.222486	0.204548	0.0973257	2.286	0.0222545	0.0492186	58081.2	50468.9	58092	56137.6	63531.6	73165.3	63200.1
ENSMUSG00000007122.11	chr1	172209894	172219868	Casq1	protein_coding	KNOWN	9975	66.5144	0.324778	0.356542	0.252694	1.28526	0.198702	0.299709	60.352	50.7872	60.851	67.2441	72.5514	94.8474	58.9681
ENSMUSG00000008136.14	chr1	43123074	43196984	Fhl2	protein_coding	KNOWN	73911	1459.59	1.14343	1.17363	0.136145	8.39862	4.51749e-17	1.40385e-15	916.057	749.112	884.202	1342.39	1887.4	2190.34	2247.64
ENSMUSG00000008475.13	chr1	152766542	152775597	Arpc5	protein_coding	KNOWN	9056	13851.1	1.04115	1.0686	0.117404	8.86809	7.44108e-19	2.75178e-17	8478.38	8480.49	8579.57	14148.6	17769.8	19089.6	20411.2
ENSMUSG00000009418.15	chr1	135434580	135607295	Nav1	protein_coding	KNOWN	172716	7520.54	-0.131892	-0.121061	0.0887954	-1.48534	0.137453	0.222948	7854.38	8085.92	7709.03	6774.22	7069.5	7881.18	7269.53
ENSMUSG00000009633.3	chr1	193272161	193273217	G0s2	protein_coding	KNOWN	1057	193.04	0.095323	0.0994404	0.168673	0.565134	0.571983	0.676481	191.833	178.732	185.865	175.582	206.985	184.636	227.644
ENSMUSG00000009772.15	chr1	132316126	132333488	Nuak2	protein_coding	KNOWN	17363	76.6705	0.272763	0.304067	0.258242	1.05623	0.290863	0.404497	73.2845	59.5773	69.9579	78.4514	110.961	59.4377	85.0237
ENSMUSG00000009905.5	chr1	106720459	106759727	Kdsr	protein_coding	KNOWN	39269	2290.62	-0.474142	-0.478936	0.0845792	-5.60589	2.07183e-08	1.89187e-07	2717.99	2745.44	2731.26	1978.72	1908.74	1982.94	1969.26
ENSMUSG00000009907.17	chr1	106764071	106796728	Vps4b	protein_coding	KNOWN	32658	3764.44	-0.16829	-0.167151	0.0945762	-1.77941	0.0751719	0.136373	3964.91	4062	4019.48	4059.55	3635.04	3280.45	3329.64
ENSMUSG00000010175.13	chr1	190118035	190170714	Prox1	protein_coding	KNOWN	52680	21510.5	-0.04183	-0.0266774	0.111557	-0.374967	0.707685	0.787615	21516.6	22243.8	21453.9	19734.9	17891.4	25151	22582
ENSMUSG00000010290.7	chr1	43098710	43115947	AI597479	protein_coding	KNOWN	17238	2061.11	-0.474774	-0.475113	0.0935759	-5.07368	3.90204e-07	2.86696e-06	2318.16	2618.47	2427.42	1962.53	1795.65	1585.85	1719.67
ENSMUSG00000010453.12	chr1	36335730	36369181	Kansl3	protein_coding	KNOWN	33452	6184.27	0.0699026	0.0751494	0.0803473	0.870006	0.384297	0.501183	5842.29	6189.21	5971.26	6877.57	6542.43	5953.88	5913.26
ENSMUSG00000010609.15	chr1	180227004	180263438	Psen2	protein_coding	KNOWN	36435	674.882	-0.1568	-0.171556	0.1109	-1.41388	0.157398	0.248431	719.913	700.278	743.044	584.027	649.762	653.814	673.333
ENSMUSG00000013275.9	chr1	131827493	131848865	Slc41a1	protein_coding	KNOWN	21373	8621.22	0.294636	0.308245	0.111299	2.64724	0.00811526	0.0208035	7729.36	7413.96	7621.69	10888.6	10026	7878.65	8790.36
ENSMUSG00000013593.12	chr1	171234853	171251388	Ndufs2	protein_coding	KNOWN	16536	9271.63	0.0933413	0.101314	0.0889526	1.04934	0.294023	0.407621	8859.89	9061.62	8783.24	9090.4	9601.33	9195.14	10309.8
ENSMUSG00000013698.12	chr1	172196728	172206804	Pea15a	protein_coding	KNOWN	10077	35036.1	0.44758	0.467495	0.0907513	4.93195	8.14146e-07	5.55697e-06	27765.1	30593.5	27888.4	38352.8	38962.3	38960.8	42729.9
ENSMUSG00000013973.12	chr1	171329145	171342331	Dedd	protein_coding	KNOWN	13187	289.715	0.0966006	0.102503	0.168715	0.572568	0.566937	0.672054	268.351	284.213	281.488	363.616	300.875	307.305	222.159
ENSMUSG00000013997.10	chr1	171338008	171345646	Nit1	protein_coding	KNOWN	7639	1500.08	-0.024591	-0.0404404	0.0905219	-0.271658	0.785885	0.847682	1569.15	1432.79	1570.53	1459.45	1451.03	1487.21	1530.43
ENSMUSG00000014226.10	chr1	160202367	160212875	Cacybp	protein_coding	KNOWN	10509	4403.37	0.150046	0.159624	0.121789	1.23201	0.217946	0.321814	4128.72	4188.97	4064.6	4867.72	4629.42	3800.22	5143.94
ENSMUSG00000014602.15	chr1	93015464	93101951	Kif1a	protein_coding	KNOWN	86488	71690.2	0.278904	0.281651	0.0796072	3.5035	0.000459187	0.00168889	64197.3	63218.4	64066.2	71789.3	75343.6	83069.8	80147.2
ENSMUSG00000014980.14	chr1	152370735	152386688	Tsen15	protein_coding	KNOWN	15954	857.126	-0.754692	-0.760195	0.125887	-5.99498	2.03514e-09	2.17916e-08	1108.97	1132.95	1115.19	801.948	715.912	547.585	577.339
ENSMUSG00000015222.17	chr1	66175273	66442583	Map2	protein_coding	KNOWN	267311	111619	0.142752	0.123748	0.0859265	1.66132	0.0966485	0.168106	110614	97764.5	110175	114405	113522	123675	111178
ENSMUSG00000015484.3	chr1	156075966	156205026	Fam163a	protein_coding	KNOWN	129061	736.007	0.305484	0.288076	0.105507	2.8954	0.00378672	0.0108122	655.25	611.4	693.784	739.685	732.983	853.626	865.322
ENSMUSG00000015829.13	chr1	159523769	159931729	Tnr	protein_coding	KNOWN	407961	23152.6	-0.118327	-0.135162	0.099969	-1.18363	0.236558	0.343946	25461	22512.4	25225	20574.2	21206.4	25909.8	21179.1
ENSMUSG00000015843.10	chr1	167598384	167639623	Rxrg	protein_coding	KNOWN	41240	195.239	-0.0297821	-0.0183859	0.170803	-0.174366	0.861578	0.904944	183.211	224.636	182.139	175.582	214.454	179.578	207.074
ENSMUSG00000015961.8	chr1	177762962	177796511	Adss	protein_coding	KNOWN	33550	4759.36	0.00580743	0.00689085	0.0846767	0.0685836	0.945321	0.963958	4733.32	4765.21	4740.58	4891.38	4872.68	4442.65	4869.67
ENSMUSG00000016179.11	chr1	193346346	193370298	Camk1g	protein_coding	KNOWN	23953	831.06	0.0908482	0.104542	0.106222	0.855271	0.392401	0.509193	788.887	829.199	772.435	838.06	935.7	837.186	815.954
ENSMUSG00000016181.9	chr1	193091104	193130272	Diexf	protein_coding	KNOWN	39169	1213.29	-0.587619	-0.596198	0.124663	-4.71366	2.43301e-06	1.51518e-05	1464.61	1520.69	1527.48	1230.32	1037.06	811.893	900.977
ENSMUSG00000016194.14	chr1	193221634	193264075	Hsd11b1	protein_coding	KNOWN	42442	2287.73	0.492714	0.505378	0.108831	4.52732	5.97378e-06	3.43956e-05	1798.7	1895.73	1841.67	2417.05	2527.56	2535.59	2997.77
ENSMUSG00000016200.13	chr1	192891233	193035775	Syt14	protein_coding	KNOWN	144543	3427.15	0.16324	0.162259	0.0947114	1.72355	0.0847883	0.150744	3208.35	3179.09	3239.18	3441.9	3451.53	3994.97	3475
ENSMUSG00000016262.14	chr1	192844488	192855756	Sertad4	protein_coding	KNOWN	11269	1099.1	-0.980973	-0.996627	0.120966	-8.10948	5.08366e-16	1.3959e-14	1530.35	1533.38	1548.18	902.814	838.609	708.194	632.193
ENSMUSG00000016481.15	chr1	195097382	195131586	Cr1l	protein_coding	KNOWN	34205	1454.45	-0.196088	-0.188869	0.101885	-1.92461	0.0542786	0.104355	1590.71	1567.57	1534.11	1517.97	1387.01	1330.39	1253.41
ENSMUSG00000016493.13	chr1	195036826	195092249	Cd46	protein_coding	KNOWN	55424	913.882	-0.0825237	-0.0851265	0.154816	-0.533044	0.594003	0.695492	898.813	986.445	949.193	860.475	821.538	1130.58	750.129
ENSMUSG00000016494.9	chr1	194938819	194961279	Cd34	protein_coding	KNOWN	22461	1143.03	0.233531	0.240802	0.113943	2.04954	0.0404089	0.0813351	1043.23	1023.56	1039.85	1313.75	1335.8	1038.26	1206.79
ENSMUSG00000016526.8	chr1	131127455	131138340	Dyrk3	protein_coding	KNOWN	10886	3300.1	2.47834	2.57448	0.139265	17.7959	7.60603e-71	3.48289e-68	842.772	879.987	860.607	3755.71	4791.6	5807.19	6162.85
ENSMUSG00000016528.10	chr1	131053700	131097826	Mapkapk2	protein_coding	KNOWN	44127	4677.88	1.53084	1.56176	0.106115	14.4263	3.53541e-47	6.71253e-45	2229.79	2186.78	2217.13	5445.52	6473.08	6913.74	7279.13
ENSMUSG00000016918.15	chr1	12692277	12861192	Sulf1	protein_coding	KNOWN	168916	220.058	-0.286045	-0.30161	0.189797	-1.50711	0.131783	0.215654	262.962	234.403	242.576	193.015	237.926	220.046	149.477
ENSMUSG00000018189.12	chr1	143777272	143807466	Uchl5	protein_coding	KNOWN	30195	1971.28	0.218547	0.227317	0.102858	2.12474	0.0336079	0.06946	1782.54	1828.34	1777.51	2034.76	2067.72	1974.09	2334.04
ENSMUSG00000018196.18	chr1	143716338	143749676	Glrx2	protein_coding	KNOWN	33339	4826.36	-0.443977	-0.46379	0.0920066	-4.82549	1.39661e-06	9.14758e-06	5792.71	5470.37	5914.55	4446.82	4259.2	4056.94	3843.9
ENSMUSG00000018199.8	chr1	143750790	143777068	Trove2	protein_coding	KNOWN	26279	4876.78	-0.327512	-0.322158	0.102943	-3.18148	0.00146522	0.00472886	5328.22	5764.35	5426.91	5220.13	4392.56	4151.79	3853.49
ENSMUSG00000018417.14	chr1	51749765	51916071	Myo1b	protein_coding	KNOWN	166307	1519.84	0.105418	0.114418	0.0984644	1.07062	0.284338	0.397028	1468.92	1459.16	1426.07	1453.22	1652.68	1608.61	1570.2
ENSMUSG00000019230.14	chr1	138825186	138848577	Lhx9	protein_coding	KNOWN	23392	1468.35	-0.849596	-0.863521	0.13918	-6.10428	1.03262e-09	1.16923e-08	2043.35	1878.15	2010.15	1332.43	1206.7	858.685	948.975
ENSMUSG00000019699.16	chr1	177020073	177258203	Akt3	protein_coding	KNOWN	238131	19292.7	0.103146	0.111895	0.0836799	1.23263	0.217714	0.321532	18150.9	19004.2	18173.3	19965.3	19132.2	19505.7	21117.4
ENSMUSG00000020423.6	chr1	134075170	134079120	Btg2	protein_coding	KNOWN	3951	20232	2.51133	4.44109	0.408583	6.14645	7.92383e-10	9.13147e-09	1562.69	1612.5	1551.49	9929.71	17942.6	30960.7	78064.1
ENSMUSG00000022995.16	chr1	181896384	182019990	Enah	protein_coding	KNOWN	123607	15741	0.0858792	0.0841664	0.0786276	1.09223	0.274733	0.386446	15134.3	15213.7	15307.5	16789.8	16381.7	16174.6	15185
ENSMUSG00000023150.14	chr1	151344477	151364422	Ivns1abp	protein_coding	KNOWN	19946	26334.5	1.99546	2.24736	0.249739	7.99018	1.34745e-15	3.53172e-14	8198.17	8660.2	8287.74	24092.1	35216.3	53812.6	46074.6
ENSMUSG00000025776.13	chr1	17727045	17766344	Crispld1	protein_coding	KNOWN	39300	512.179	0.00275784	-0.00460757	0.124576	0.0221378	0.982338	0.988433	508.681	504.942	525.719	574.065	498.258	504.588	469.002
ENSMUSG00000025777.8	chr1	17145362	17164271	Gdap1	protein_coding	KNOWN	18910	8657.82	-0.224214	-0.230717	0.0872671	-2.56929	0.0101908	0.0252926	9362.1	9455.22	9551.95	8695.65	8026.54	7436.03	8077.25
ENSMUSG00000025779.10	chr1	16688051	16709611	Ly96	protein_coding	KNOWN	21561	45.1418	-0.0718394	-0.0666649	0.275136	-0.261105	0.794011	0.85408	50.6526	41.9971	46.3627	29.8862	36.2757	51.8499	58.9681
ENSMUSG00000025902.13	chr1	4490931	4497354	Sox17	protein_coding	KNOWN	6424	318.85	0.246381	0.245334	0.141339	1.7432	0.0812993	0.145572	301.76	267.61	295.562	353.654	333.95	366.743	312.668
ENSMUSG00000025903.14	chr1	4807788	4848410	Lypla1	protein_coding	KNOWN	40623	1061.1	-0.286132	-0.268308	0.104083	-2.74908	0.00597634	0.0160368	1151	1261.87	1112.29	1041.04	993.315	872.596	995.6
ENSMUSG00000025905.13	chr1	5588466	5606131	Oprk1	protein_coding	KNOWN	17666	60.4464	-0.318425	-0.362585	0.275166	-1.15721	0.247186	0.355975	70.0514	58.6007	79.0649	73.4704	64.016	35.4097	42.5119
ENSMUSG00000025907.14	chr1	6206197	6276648	Rb1cc1	protein_coding	KNOWN	70452	8389.78	-0.133745	-0.136398	0.0911011	-1.46809	0.14208	0.229085	8887.91	8781.31	8868.1	8665.77	7691.52	8236.54	7597.28
ENSMUSG00000025909.16	chr1	8361475	9299878	Sntg1	protein_coding	KNOWN	938404	2153.37	0.00476797	0.00830194	0.0895995	0.0532143	0.957561	0.972675	2085.38	2219.99	2133.51	2124.41	2099.72	2173.9	2236.67
ENSMUSG00000025911.14	chr1	9547948	9580673	Adhfe1	protein_coding	KNOWN	32726	880.777	0.329944	0.355382	0.121577	2.71386	0.00665039	0.0175789	752.244	799.899	726.486	928.964	915.429	920.652	1121.76
ENSMUSG00000025912.16	chr1	9667415	9700209	Mybl1	protein_coding	KNOWN	32795	209.285	0.357422	0.379365	0.169598	2.10746	0.0350779	0.0721342	162.735	193.382	179.655	211.694	209.119	264.308	244.1
ENSMUSG00000025915.14	chr1	9798107	9900845	Sgk3	protein_coding	KNOWN	102739	567.886	-0.14534	-0.12564	0.117069	-1.24149	0.214423	0.318071	570.111	661.211	557.594	582.782	530.266	542.527	530.713
ENSMUSG00000025917.9	chr1	10024601	10038168	Cops5	protein_coding	KNOWN	13568	3576.3	-0.00217196	0.0161639	0.109783	-0.0197842	0.984216	0.989555	3497.18	3777.79	3385.3	3659.82	3639.31	3121.11	3953.6
ENSMUSG00000025920.19	chr1	16228674	16520112	Stau2	protein_coding	KNOWN	291439	9926.21	0.25043	0.257673	0.0965799	2.59299	0.00951465	0.0238463	8978.43	8944.42	8862.72	10461.4	10471.9	9914.71	11849.8
ENSMUSG00000025921.7	chr1	16105774	16133734	Rdh10	protein_coding	KNOWN	27961	993.341	0.0242377	0.0429457	0.121721	0.199126	0.842164	0.890798	968.865	1033.33	927.253	1119.49	914.362	923.181	1066.91
ENSMUSG00000025925.14	chr1	15805646	15844052	Terf1	protein_coding	KNOWN	38407	602.113	-0.291597	-0.288467	0.117994	-2.47128	0.0134629	0.0320838	649.862	706.138	659.012	628.856	554.805	488.148	527.97
ENSMUSG00000025931.15	chr1	20890606	20939650	Paqr8	protein_coding	KNOWN	49045	15396.9	0.187775	0.179262	0.0839277	2.23734	0.0252638	0.0547055	14887.5	13422.5	14634	14780	15661.5	16371.9	18020.9
ENSMUSG00000025932.14	chr1	14168954	14310235	Eya1	protein_coding	KNOWN	141282	1616.59	-0.189962	-0.181253	0.10131	-1.87506	0.0607846	0.114779	1773.92	1736.53	1690.17	1534.16	1439.29	1459.38	1682.65
ENSMUSG00000025933.15	chr1	21218575	21230167	Tmem14a	protein_coding	KNOWN	11593	1139.45	0.0726493	0.0731686	0.128027	0.567453	0.570406	0.675049	1094.96	1109.51	1115.19	1135.68	1117.08	1026.88	1376.84
ENSMUSG00000025934.15	chr1	21240589	21265661	Gsta3	protein_coding	KNOWN	25073	64.1893	-0.723981	-0.788743	0.240562	-3.00954	0.00261646	0.00787011	88.3725	92.7844	72.4416	43.5841	53.3467	48.056	50.74
ENSMUSG00000025935.10	chr1	13564698	13589910	Tram1	protein_coding	KNOWN	25213	2288.49	-0.251985	-0.258162	0.0893098	-2.82147	0.00478038	0.0131935	2533.71	2496.39	2544.56	2241.47	2116.8	2081.58	2004.91
ENSMUSG00000025937.6	chr1	13623330	13660546	Lactb2	protein_coding	KNOWN	37217	1145.51	-0.266501	-0.259626	0.0984622	-2.70664	0.00679686	0.0179053	1266.31	1291.17	1236.06	1068.43	996.515	1102.76	1057.31
ENSMUSG00000025938.16	chr1	12866549	12992650	Slco5a1	protein_coding	KNOWN	126102	460.287	0.465088	0.497952	0.154404	3.01215	0.00259401	0.00781467	415.998	334.024	367.59	398.483	459.848	720.84	525.227
ENSMUSG00000025939.17	chr1	16540790	16619489	Ube2w	protein_coding	KNOWN	78700	4521.21	0.148029	0.14203	0.0877912	1.68615	0.0917669	0.161115	4137.34	4313.99	4355.19	5170.32	4822.54	4276.98	4572.08
ENSMUSG00000025940.6	chr1	16665207	16678275	Tmem70	protein_coding	KNOWN	13069	1912.3	-0.397942	-0.400656	0.137616	-2.89167	0.00383197	0.0109008	2241.65	2217.06	2200.98	1987.44	1717.76	1282.34	1738.87
ENSMUSG00000025949.15	chr1	65186683	65278695	Pikfyve	protein_coding	KNOWN	92013	4921.13	-0.00200063	-0.00583046	0.103956	-0.0192449	0.984646	0.989795	4900.37	4842.37	5054.77	5607.41	5172.49	4656.37	4214.16
ENSMUSG00000025950.16	chr1	65158616	65186500	Idh1	protein_coding	KNOWN	27885	2580.41	0.153328	0.177999	0.0924608	1.6583	0.0972572	0.168995	2361.27	2557.92	2281.7	2790.63	2826.31	2458.44	2786.58
ENSMUSG00000025956.10	chr1	64606473	64617242	Mettl21a	protein_coding	KNOWN	10770	536.131	-0.401037	-0.403189	0.140622	-2.85188	0.0043462	0.0121505	625.074	639.724	603.956	483.161	509.994	378.125	512.885
ENSMUSG00000025958.14	chr1	64532645	64604548	Creb1	protein_coding	KNOWN	71904	5294.79	-0.0353819	-0.00894189	0.137729	-0.256895	0.79726	0.856531	5218.29	5411.77	5310.59	7137.83	5639.81	4072.11	4273.13
ENSMUSG00000025959.13	chr1	64029447	64122282	Klf7	protein_coding	KNOWN	92836	2290.39	0.741441	0.82639	0.179048	4.14102	3.45768e-05	0.000167546	1663.99	1479.67	1621.86	1585.22	2256.56	4213.75	3211.7
ENSMUSG00000025961.1	chr1	63754907	63769267	4933402D24Rik	protein_coding	KNOWN	14361	74.7562	-0.686745	-0.754508	0.227257	-3.02188	0.00251207	0.00760163	86.2171	105.481	100.59	57.282	68.2837	50.5853	54.854
ENSMUSG00000025962.15	chr1	63730614	63754655	Fastkd2	protein_coding	KNOWN	24042	1231.89	-0.343065	-0.357269	0.115221	-2.97746	0.00290644	0.00861793	1478.62	1307.77	1438.9	1227.83	1092.54	1024.35	1053.2
ENSMUSG00000025964.15	chr1	63445891	63596276	Adam23	protein_coding	KNOWN	150386	6220.1	-0.0487539	-0.0536683	0.0864311	-0.564078	0.572701	0.677177	6533.1	6114	6410.88	6096.79	6449.61	5865.36	6070.97
ENSMUSG00000025967.16	chr1	63176825	63180486	Eef1b2	protein_coding	KNOWN	3662	8661.1	0.40252	0.413014	0.109689	3.66965	0.000242881	0.000963174	7090.28	7478.42	7276.87	8918.55	9359.14	9214.1	11290.3
ENSMUSG00000025968.16	chr1	63143596	63176833	Ndufs1	protein_coding	KNOWN	33238	7657.64	-0.00385768	-0.0126003	0.0792831	-0.048657	0.961193	0.975287	7565.55	7694.27	7827.84	7804.05	7806.75	7200.81	7704.25
ENSMUSG00000025969.15	chr1	62703285	62818695	Nrp2	protein_coding	KNOWN	115411	11969.4	0.49724	0.516894	0.131985	3.76741	0.000164952	0.000681746	9981.79	8799.87	10032.1	9886.12	12265.5	18156.3	14663.9
ENSMUSG00000025971.6	chr1	57406328	57417953	9430016H08Rik	protein_coding	KNOWN	11626	791.442	-0.240032	-0.23699	0.114439	-2.09747	0.0359519	0.0736203	851.394	895.614	852.328	836.815	723.381	719.575	660.991
ENSMUSG00000025978.14	chr1	55170159	55226782	Rftn2	protein_coding	KNOWN	56624	2042.76	0.398952	0.391541	0.0920568	4.33376	1.46586e-05	7.75994e-05	1736.2	1675	1790.34	2186.68	2075.18	2349.69	2486.26
ENSMUSG00000025979.13	chr1	55131231	55154899	Mob4	protein_coding	KNOWN	23669	3971.15	0.134811	0.145807	0.0990262	1.36136	0.173399	0.268568	3763.38	3746.54	3721.02	4662.25	4390.43	3630.76	3883.66
ENSMUSG00000025980.14	chr1	55077835	55088243	Hspd1	protein_coding	KNOWN	10409	10840.9	0.234496	0.231938	0.0960844	2.44052	0.0146662	0.0345478	9869.7	9691.57	10013.9	11643.2	12484.2	10308	11875.9
ENSMUSG00000025981.13	chr1	55052770	55072702	Coq10b	protein_coding	KNOWN	19933	4040.06	2.7232	2.87565	0.162753	16.7322	7.64135e-63	2.64374e-60	844.928	910.264	866.816	4189.06	5692.09	7687.69	8089.6
ENSMUSG00000025982.13	chr1	54985169	55027481	Sf3b1	protein_coding	KNOWN	42313	49457.3	1.33967	1.41267	0.144936	9.24317	2.39297e-20	1.01793e-18	25586	24858.4	25648.5	46503	58264.1	89879.9	75461.3
ENSMUSG00000025986.6	chr1	46807544	46892852	Slc39a10	protein_coding	KNOWN	85309	8929.66	-0.385744	-0.390997	0.0826123	-4.66933	3.02182e-06	1.84208e-05	10241.5	10373.3	10378.6	8515.09	7840.89	7629.52	7528.71
ENSMUSG00000025993.10	chr1	45908068	45926523	Slc40a1	protein_coding	KNOWN	18456	709.669	-0.103843	-0.109523	0.110434	-0.940317	0.347055	0.463524	742.545	732.508	746.77	699.836	703.109	710.723	632.193
ENSMUSG00000025995.16	chr1	45795166	45823619	Wdr75	protein_coding	KNOWN	28454	2246.91	-0.229572	-0.22784	0.109471	-2.0971	0.0359846	0.0736582	2445.33	2450.48	2458.88	2475.58	2143.47	1853.95	1900.69
ENSMUSG00000025997.13	chr1	69531214	69687245	Ikzf2	protein_coding	KNOWN	156032	405.94	-0.0754174	-0.0672479	0.147067	-0.51281	0.608084	0.707042	455.873	397.508	396.98	399.729	376.627	467.914	346.952
ENSMUSG00000026000.16	chr1	67000517	67038872	Lancl1	protein_coding	KNOWN	38356	10281.8	0.0398297	0.0417052	0.0886328	0.449379	0.653158	0.743404	10013	10213.1	10110.8	9752.88	10265	10272.6	11345.2
ENSMUSG00000026003.5	chr1	66830839	66863277	Acadl	protein_coding	KNOWN	32439	1886.89	0.420436	0.421083	0.099269	4.23532	2.28225e-05	0.000115365	1529.28	1596.87	1616.07	1976.23	1967.42	2214.37	2307.98
ENSMUSG00000026004.15	chr1	66719248	66817562	Kansl1l	protein_coding	KNOWN	98315	2208.9	1.01056	1.06093	0.128516	7.86328	3.74195e-15	9.2181e-14	1329.9	1420.09	1338.72	3689.71	2993.81	2453.39	2236.67
ENSMUSG00000026005.15	chr1	66700831	66719805	Rpe	protein_coding	KNOWN	18975	1459	0.0156113	0.0136574	0.0972654	0.160502	0.872486	0.913806	1437.67	1455.25	1460.42	1583.97	1430.76	1388.57	1456.37
ENSMUSG00000026014.15	chr1	60482292	60567104	Raph1	protein_coding	KNOWN	84813	4164.27	-0.00978194	-0.0147915	0.0975503	-0.100276	0.920125	0.946896	4334.57	3976.06	4255.43	4387.05	4388.3	3997.5	3810.98
ENSMUSG00000026017.13	chr1	60098247	60153953	Carf	protein_coding	KNOWN	55707	1501.68	-0.6424	-0.660516	0.109107	-5.88782	3.91316e-09	4.02404e-08	1900.01	1868.38	1933.57	1333.67	1159.76	1233.02	1083.37
ENSMUSG00000026018.12	chr1	59982490	60043184	Ica1l	protein_coding	KNOWN	60695	3181.41	-0.163505	-0.166251	0.0908203	-1.80031	0.0718119	0.131457	3301.04	3462.32	3413.86	2859.12	2884.99	3210.9	3137.65
ENSMUSG00000026019.15	chr1	60069785	60098645	Wdr12	protein_coding	KNOWN	28861	2735.63	-0.235264	-0.242178	0.105335	-2.23349	0.0255165	0.0551146	2972.34	2993.52	3035.93	2879.04	2465.68	2270.01	2532.88
ENSMUSG00000026020.9	chr1	59684971	59719044	Nop58	protein_coding	KNOWN	34074	5211.33	0.527638	0.553723	0.101576	5.19452	2.05251e-07	1.58903e-06	3987.54	4379.42	3968.97	5918.72	5452.03	6192.9	6579.74
ENSMUSG00000026021.15	chr1	59586558	59670834	Sumo1	protein_coding	KNOWN	84277	4552.34	0.31621	0.328332	0.107845	2.93206	0.00336717	0.00977867	3927.19	4072.75	3916.82	4882.67	4822.54	4561.53	5682.88
ENSMUSG00000026024.14	chr1	59162926	59237231	Als2	protein_coding	KNOWN	74306	5499.68	-0.370759	-0.389611	0.0954559	-3.88409	0.000102714	0.000447067	6513.7	5997.78	6567.77	5093.11	5087.14	4800.54	4437.69
ENSMUSG00000026027.13	chr1	58973522	58995715	Stradb	protein_coding	KNOWN	22194	1879.56	-0.474452	-0.477581	0.103505	-4.58387	4.56446e-06	2.68572e-05	2220.09	2263.94	2237	1765.78	1709.23	1379.71	1581.17
ENSMUSG00000026028.12	chr1	58900449	58973430	Trak2	protein_coding	KNOWN	72982	13435.2	0.00236364	0.00559592	0.0954022	0.0247756	0.980234	0.987615	13314.1	13542.6	13359.5	15120	13079.5	12318.8	13311.7
ENSMUSG00000026029.14	chr1	58795374	58847503	Casp8	protein_coding	KNOWN	52130	173.242	0.416956	0.442807	0.175546	2.37519	0.0175397	0.0401465	141.181	148.455	141.572	230.373	178.178	179.578	193.36
ENSMUSG00000026031.15	chr1	58711508	58758884	Cflar	protein_coding	KNOWN	47377	2031.01	-0.0496046	-0.0449117	0.114226	-0.434268	0.664094	0.75162	2095.08	2050.05	2056.51	2344.83	1950.35	1774.28	1945.95
ENSMUSG00000026032.8	chr1	58586384	58595964	Ndufb3	protein_coding	KNOWN	9581	2752.88	0.323938	0.330142	0.125669	2.57771	0.00994575	0.0247991	2386.06	2387.98	2426.59	2850.4	2874.32	2686.08	3658.76
ENSMUSG00000026034.17	chr1	58410189	58424066	Clk1	protein_coding	KNOWN	13878	13125.4	0.206786	0.221701	0.114656	1.80353	0.0713058	0.13073	12240.7	11778.7	11943.4	16900.7	14158.2	12651.4	12205
ENSMUSG00000026035.15	chr1	58430994	58445486	Ppil3	protein_coding	KNOWN	14493	565.997	-0.344697	-0.351391	0.143838	-2.39642	0.0165559	0.0381696	617.53	682.698	637.073	556.631	472.651	424.916	570.482
ENSMUSG00000026036.17	chr1	58445151	58481816	Nif3l1	protein_coding	KNOWN	36666	1103.41	-0.543029	-0.556827	0.119904	-4.52885	5.93047e-06	3.41715e-05	1361.15	1310.7	1379.7	1009.91	1016.79	763.837	881.778
ENSMUSG00000026037.14	chr1	58462771	58505109	Orc2	protein_coding	KNOWN	42339	1522.27	-0.327706	-0.315949	0.130789	-2.50561	0.0122239	0.0295289	1689.86	1779.51	1675.68	1710.99	1458.5	1050.91	1290.44
ENSMUSG00000026042.16	chr1	45374321	45503282	Col5a2	protein_coding	KNOWN	128962	806.426	0.248949	0.225947	0.118976	2.09242	0.0364009	0.07434	763.021	657.304	785.267	800.702	910.094	918.122	810.468
ENSMUSG00000026043.18	chr1	45311538	45349706	Col3a1	protein_coding	KNOWN	38169	187.997	0.113932	0.100449	0.217365	0.524148	0.600176	0.700828	202.61	127.945	211.116	231.618	214.454	156.814	171.419
ENSMUSG00000026047.13	chr1	44106546	44118808	Kdelc1	protein_coding	KNOWN	12263	381.067	-0.505089	-0.525491	0.127691	-3.95556	7.6356e-05	0.000343381	447.251	466.852	470.664	323.768	340.352	323.746	294.84
ENSMUSG00000026048.16	chr1	44147744	44181260	Ercc5	protein_coding	KNOWN	33517	1836.02	0.25437	0.275124	0.103422	2.45952	0.0139122	0.0329779	1702.79	1633.98	1580.88	1763.29	1974.89	2227.02	1969.26
ENSMUSG00000026049.11	chr1	44086613	44102441	Tex30	protein_coding	KNOWN	15829	441.365	1.52244	1.58778	0.133103	11.438	2.69905e-30	2.24714e-28	199.377	227.566	190.004	593.989	600.683	603.229	674.704
ENSMUSG00000026058.11	chr1	32172714	32658568	Khdrbs2	protein_coding	KNOWN	485855	881.147	0.194241	0.215958	0.138898	1.39845	0.161978	0.25432	783.498	849.71	786.923	851.758	815.137	1162.2	918.805
ENSMUSG00000026062.12	chr1	40680574	40769273	Slc9a2	protein_coding	KNOWN	88700	1002.61	-0.214879	-0.233621	0.177009	-1.21394	0.224771	0.330076	1134.83	990.351	1163.62	953.869	1120.28	632.316	1023.03
ENSMUSG00000026064.15	chr1	30940302	30949770	Ptp4a1	protein_coding	KNOWN	9469	3259.8	1.06648	1.10218	0.0958952	11.1213	9.87685e-29	7.53787e-27	2021.79	1977.77	1908.32	3700.91	3933.78	4694.31	4581.68
ENSMUSG00000026065.8	chr1	40580081	40630725	Slc9a4	protein_coding	KNOWN	50645	1060.15	-0.0485028	-0.05219	0.14912	-0.32526	0.744984	0.816634	1114.36	1001.09	1130.92	1148.13	1225.91	779.013	1021.66
ENSMUSG00000026072.12	chr1	40225080	40317257	Il1r1	protein_coding	KNOWN	92178	1302.9	-1.60819	-1.64358	0.14241	-11.2927	1.42654e-29	1.15076e-27	2097.23	2233.66	2061.48	896.587	618.821	614.611	597.909
ENSMUSG00000026074.14	chr1	39900913	40026310	Map4k4	protein_coding	KNOWN	125398	10136.7	0.169748	0.171789	0.0838127	2.02533	0.0428337	0.0855191	9619.67	9265.74	9475.37	10331.9	9951.28	11654.8	10658.1
ENSMUSG00000026077.15	chr1	39193731	39363236	Npas2	protein_coding	KNOWN	169506	961.165	-0.197169	-0.190428	0.109016	-1.80862	0.0705097	0.129514	949.466	1151.5	1001.76	905.304	923.964	865.008	931.147
ENSMUSG00000026078.10	chr1	38985608	38997238	Pdcl3	protein_coding	KNOWN	11631	1200.97	0.0704898	0.0805177	0.0976902	0.721565	0.470562	0.584925	1141.3	1207.17	1140.02	1268.92	1196.03	1186.22	1267.13
ENSMUSG00000026080.13	chr1	38863867	38898161	Chst10	protein_coding	KNOWN	34295	3978.63	-0.214115	-0.223226	0.091665	-2.33585	0.0194992	0.044014	4296.85	4309.1	4394.93	3845.36	3726.8	3400.59	3876.81
ENSMUSG00000026082.11	chr1	38052786	38129801	Rev1	protein_coding	KNOWN	77016	2136.81	0.0826351	0.0931462	0.113611	0.727351	0.467011	0.581532	2025.02	2104.74	2045.34	2595.12	2250.16	2110.67	1826.64
ENSMUSG00000026083.12	chr1	37998010	38055579	Eif5b	protein_coding	KNOWN	57570	6883.67	0.322732	0.351333	0.0924261	3.49178	0.00047981	0.00175603	5915.57	6186.28	5738.21	8319.58	8523.73	6906.15	6596.2
ENSMUSG00000026087.11	chr1	37890477	37898535	Mrpl30	protein_coding	KNOWN	8059	1988.35	0.137616	0.149495	0.126256	1.08997	0.275724	0.387678	1801.94	1988.52	1824.29	2040.98	2074.12	1781.87	2406.72
ENSMUSG00000026088.15	chr1	37874801	37890411	Mitd1	protein_coding	KNOWN	15611	339.257	-0.48023	-0.495891	0.176189	-2.72565	0.00641743	0.0170384	423.542	398.485	398.636	379.804	249.662	250.397	274.27
ENSMUSG00000026090.16	chr1	37611677	37720085	2010300C02Rik	protein_coding	KNOWN	108409	36039.4	0.0996877	0.0999514	0.0835745	1.1928	0.232947	0.339743	34393.1	34759	34708.7	35913.3	36497.6	39977.5	36026.7
ENSMUSG00000026094.14	chr1	53755506	53785224	Stk17b	protein_coding	KNOWN	29719	354.304	0.129654	0.140737	0.157429	0.82357	0.410184	0.526693	296.371	376.998	330.748	357.39	331.816	361.685	425.119
ENSMUSG00000026095.15	chr1	53344617	53352752	Asnsd1	protein_coding	KNOWN	8136	63.9175	-0.124539	-0.143935	0.235638	-0.528519	0.59714	0.698277	62.5074	67.3908	72.8556	62.263	62.949	63.2316	56.2254
ENSMUSG00000026096.14	chr1	53313624	53326343	Osgepl1	protein_coding	KNOWN	12720	533.485	-0.59833	-0.603621	0.125971	-4.74974	2.03677e-06	1.29378e-05	664.95	675.861	648.249	503.085	420.372	417.328	404.548
ENSMUSG00000026097.9	chr1	53297095	53310309	Ormdl1	protein_coding	KNOWN	13215	292.422	-0.65061	-0.669806	0.161725	-4.02294	5.74753e-05	0.000265136	366.423	375.044	372.143	291.391	244.328	179.578	218.045
ENSMUSG00000026098.13	chr1	53189187	53297018	Pms1	protein_coding	KNOWN	107832	293.501	0.0795704	0.0825997	0.146102	0.544622	0.586014	0.689186	293.138	273.47	285.213	301.353	266.733	345.244	289.355
ENSMUSG00000026102.9	chr1	52785427	52817688	Inpp1	protein_coding	KNOWN	32262	1845.47	-0.527437	-0.531967	0.0983304	-5.36393	8.1432e-08	6.81988e-07	2294.45	2189.71	2236.58	1651.22	1645.21	1454.33	1446.77
ENSMUSG00000026103.14	chr1	52163448	52233232	Gls	protein_coding	KNOWN	69785	45118.4	0.514911	0.517152	0.0960729	5.35958	8.34156e-08	6.971e-07	36669.2	35021.7	36909.6	47771.9	47702.6	60358.3	51395.5
ENSMUSG00000026104.14	chr1	52119440	52161865	Stat1	protein_coding	KNOWN	42426	468.394	-0.334416	-0.321227	0.131052	-2.55178	0.0107174	0.0264018	527.002	555.73	503.366	489.387	469.451	388.242	345.58
ENSMUSG00000026107.11	chr1	51465862	51478425	Nabp1	protein_coding	KNOWN	12564	1440.03	0.571023	0.56977	0.112993	5.05362	4.3351e-07	3.15684e-06	1177.94	1045.05	1160.72	1664.91	1682.55	1508.71	1840.35
ENSMUSG00000026109.14	chr1	50900647	51187270	Tmeff2	protein_coding	KNOWN	286624	7161.27	-0.0206482	-0.0193026	0.0811215	-0.254535	0.799083	0.857817	7274.57	7179.56	7194.08	6923.65	7256.21	6902.36	7398.44
ENSMUSG00000026110.15	chr1	37439340	37541016	Mgat4a	protein_coding	KNOWN	101677	4454.49	0.365224	0.378273	0.100112	3.64815	0.000264135	0.00103637	3906.71	3722.12	3780.21	5526.47	5140.48	4651.31	4454.15
ENSMUSG00000026111.15	chr1	37430139	37439124	Unc50	protein_coding	KNOWN	8986	1867.98	-0.138241	-0.133017	0.113121	-1.22207	0.221683	0.326403	1946.35	2019.77	1934.81	1950.08	1821.25	1512.5	1891.09
ENSMUSG00000026112.7	chr1	37417084	37430103	Coa5	protein_coding	KNOWN	13020	6641.72	0.0572779	0.0565275	0.0964418	0.593912	0.552571	0.659283	6349.89	6611.13	6519.33	6782.93	6529.63	6296.6	7402.55
ENSMUSG00000026113.17	chr1	37299865	37410736	Inpp4a	protein_coding	KNOWN	110872	10506.1	-0.0135298	-0.0207945	0.0852331	-0.158739	0.873875	0.914707	10714.6	10323.5	10740	10283.4	10322.6	11197	9961.49
ENSMUSG00000026116.11	chr1	36792191	36943666	Tmem131	protein_coding	KNOWN	151476	8131.71	-0.160081	-0.166887	0.102838	-1.55664	0.119556	0.199483	8934.25	8266.6	8818.43	6837.72	7403.45	9105.35	7556.14
ENSMUSG00000026117.10	chr1	36761798	36782818	Zap70	protein_coding	KNOWN	21021	242.214	-0.12158	-0.132515	0.215687	-0.563686	0.572968	0.677441	284.516	227.566	252.925	175.582	271.001	180.842	303.068
ENSMUSG00000026121.13	chr1	36548639	36558349	Sema4c	protein_coding	KNOWN	9711	1577.29	2.05777	2.105	0.123824	16.6185	5.11907e-62	1.66039e-59	578.732	509.826	550.557	1923.93	2496.62	2592.49	2388.89
ENSMUSG00000026123.11	chr1	34849976	34879580	Plekhb2	protein_coding	KNOWN	29605	14728.2	0.29433	0.307428	0.0844307	3.48606	0.000490194	0.00179151	12865.7	13276	12763	15248.2	15335	16359.3	17250.2
ENSMUSG00000026127.13	chr1	34439851	34449356	Imp4	protein_coding	KNOWN	9506	1613.17	-0.286945	-0.275038	0.122854	-2.33566	0.0195091	0.0440262	1796.55	1842.99	1732.8	1834.27	1448.9	1337.98	1298.67
ENSMUSG00000026131.17	chr1	33908225	34308661	Dst	protein_coding	KNOWN	400437	26801	0.0290913	0.0262164	0.100731	0.288802	0.772733	0.837791	26828.6	25959.1	26781.5	26042.1	25750.4	30982.2	25263
ENSMUSG00000026134.11	chr1	33453810	33669795	Prim2	protein_coding	KNOWN	215986	315.554	0.132187	0.149422	0.134252	0.984622	0.32481	0.440464	287.75	319.374	283.971	344.937	320.08	325.01	327.753
ENSMUSG00000026135.17	chr1	74565127	74588246	Zfp142	protein_coding	KNOWN	23120	3222.72	0.20296	0.221033	0.0988195	2.05384	0.0399907	0.0805662	2961.56	2999.38	2871.59	3921.32	3476.07	3099.61	3229.53
ENSMUSG00000026141.13	chr1	24261890	24587472	Col19a1	protein_coding	KNOWN	325583	2389.81	0.101022	0.0993297	0.117607	0.858981	0.390351	0.507306	2222.25	2345.98	2320.62	2636.22	2444.34	2689.87	2069.37
ENSMUSG00000026142.15	chr1	82316452	82445366	Rhbdd1	protein_coding	KNOWN	128915	584.76	0.148878	0.167553	0.129293	1.15148	0.249537	0.358564	548.556	565.496	524.891	625.121	544.136	696.812	588.309
ENSMUSG00000026147.16	chr1	24177610	24252684	Col9a1	protein_coding	KNOWN	75075	51.7631	0.25898	0.307037	0.290834	0.890475	0.373211	0.490215	47.4194	42.9738	46.3627	48.5652	45.8781	87.2596	43.8832
ENSMUSG00000026150.14	chr1	82724890	82752394	Mff	protein_coding	KNOWN	27505	9195.13	-0.0246931	-0.0201639	0.0958743	-0.257557	0.796749	0.856138	9136.86	9488.43	9180.63	9745.41	9129.75	8126.52	9558.31
ENSMUSG00000026153.15	chr1	24011093	24100341	Fam135a	protein_coding	KNOWN	89249	3773.07	0.180693	0.200988	0.100435	1.79909	0.0720037	0.13169	3453	3638.12	3337.28	4307.36	3959.39	4179.61	3536.71
ENSMUSG00000026154.4	chr1	23995939	24005656	Sdhaf4	protein_coding	KNOWN	9718	594.71	-0.042371	-0.0464032	0.139086	-0.304638	0.760642	0.828432	594.898	609.447	612.649	574.065	586.813	500.794	684.304
ENSMUSG00000026155.13	chr1	23844846	23922317	Smap1	protein_coding	KNOWN	77472	1780.63	-0.00919738	-0.0124825	0.0965318	-0.0952782	0.924094	0.949526	1773.92	1791.23	1803.18	1824.31	1784.98	1631.37	1855.44
ENSMUSG00000026156.8	chr1	23761753	23849158	B3gat2	protein_coding	KNOWN	87406	751.128	0.123511	0.101393	0.105822	1.16716	0.243148	0.351394	733.923	669.024	760.43	744.666	770.326	815.687	763.842
ENSMUSG00000026158.11	chr1	23366424	23397772	Ogfrl1	protein_coding	KNOWN	31349	14929.8	-0.189835	-0.192089	0.116344	-1.63167	0.102749	0.176664	16112.9	15965.8	16146.2	15818.5	14256.4	11523.3	14685.8
ENSMUSG00000026159.13	chr1	82839483	82901182	Agfg1	protein_coding	KNOWN	61700	8198.2	-0.0278906	-0.0207123	0.0884164	-0.315445	0.752423	0.821599	8099.02	8489.28	8208.26	9214.93	8383.96	7471.44	7520.49
ENSMUSG00000026162.7	chr1	74967139	75125200	Nhej1	protein_coding	KNOWN	158062	100.555	0.262047	0.275906	0.200532	1.30675	0.191296	0.290905	93.7611	83.9943	91.4835	108.338	114.162	102.435	109.708
ENSMUSG00000026163.17	chr1	83254139	83408200	Sphkap	protein_coding	KNOWN	154062	28780.7	-0.447321	-0.473029	0.0889331	-5.02986	4.90826e-07	3.53618e-06	35290.8	31873.9	35592	24171.7	25146.5	26090.6	23299.2
ENSMUSG00000026167.14	chr1	74791516	74804179	Wnt10a	protein_coding	KNOWN	12664	143.058	-0.476223	-0.497661	0.176042	-2.70517	0.00682701	0.0179817	188.6	159.198	167.237	114.564	119.496	130.257	122.05
ENSMUSG00000026170.6	chr1	74713574	74737892	Cyp27a1	protein_coding	KNOWN	24319	97.5191	0.112194	0.126129	0.210636	0.532642	0.594281	0.695601	102.383	87.901	87.7579	117.054	99.2248	92.3181	95.9945
ENSMUSG00000026171.12	chr1	74593748	74601397	Rnf25	protein_coding	KNOWN	7650	2091.03	-0.00403858	-0.00743059	0.0866699	-0.0465973	0.962834	0.976254	2118.79	2060.79	2111.98	2144.34	2114.66	2031	2055.65
ENSMUSG00000026172.12	chr1	74588289	74592443	Bcs1l	protein_coding	KNOWN	4155	959.319	-0.268288	-0.277005	0.105426	-2.54481	0.0109336	0.0268368	1153.15	974.724	1069.24	860.475	865.283	861.214	931.147
ENSMUSG00000026173.15	chr1	74542888	74567794	Plcd4	protein_coding	KNOWN	24907	1045.79	0.187907	0.176693	0.103363	1.81793	0.0690752	0.12724	975.331	939.564	1005.08	1012.4	1134.15	1159.67	1094.34
ENSMUSG00000026174.9	chr1	74506058	74530842	Rqcd1	protein_coding	KNOWN	24785	1910.21	-0.199888	-0.191455	0.102115	-1.95748	0.0502912	0.0978607	2065.98	2090.09	2012.64	2027.28	1793.51	1622.52	1759.44
ENSMUSG00000026176.13	chr1	74391509	74397285	Ctdsp1	protein_coding	KNOWN	5777	1590.14	0.209423	0.226714	0.105632	1.98256	0.0474167	0.0932934	1440.9	1497.25	1409.51	1582.73	1637.74	1656.67	1906.18
ENSMUSG00000026177.11	chr1	74375195	74386062	Slc11a1	protein_coding	KNOWN	10868	98.3515	0.312232	0.342525	0.207478	1.50489	0.132352	0.216426	80.8285	94.7378	80.3067	129.507	103.493	104.964	94.6232
ENSMUSG00000026179.14	chr1	74284930	74353694	Pnkd	protein_coding	KNOWN	68765	6967.08	-0.0374685	-0.0311156	0.0875512	-0.427961	0.66868	0.755601	6957.72	7247.93	6953.57	6765.5	7042.82	6507.79	7294.21
ENSMUSG00000026185.8	chr1	72857932	72874884	Igfbp5	protein_coding	KNOWN	16953	13417.5	-0.30746	-0.296178	0.127968	-2.40264	0.0162773	0.0376667	14654.8	15803.6	14569.5	11096.5	10594.6	15275.5	11928
ENSMUSG00000026187.8	chr1	72307421	72394952	Xrcc5	protein_coding	KNOWN	87532	961.471	0.16244	0.172735	0.118155	1.3748	0.169195	0.263419	866.482	936.634	885.858	910.285	1003.98	990.206	1136.85
ENSMUSG00000026188.11	chr1	72284369	72303104	Tmem169	protein_coding	KNOWN	18736	695.547	-1.13821	-1.16575	0.144172	-7.89485	2.90671e-15	7.26398e-14	1046.46	976.678	1030.74	547.915	508.927	360.42	397.692
ENSMUSG00000026189.13	chr1	72259167	72284314	Pecr	protein_coding	KNOWN	25148	251.96	-0.216891	-0.210318	0.142599	-1.52098	0.128265	0.211184	279.128	280.307	259.962	236.599	234.725	228.898	244.1
ENSMUSG00000026192.13	chr1	71557150	71579631	Atic	protein_coding	KNOWN	22482	1218.68	-0.426001	-0.441217	0.108191	-3.93749	8.234e-05	0.000367321	1419.35	1425.95	1458.77	1027.34	1112.81	1129.32	957.203
ENSMUSG00000026193.15	chr1	71585520	71653200	Fn1	protein_coding	KNOWN	67681	2008.65	-0.124618	-0.124372	0.177042	-0.703887	0.481503	0.594537	1987.3	2275.66	2061.48	1390.96	2216.02	2405.33	1723.79
ENSMUSG00000026197.12	chr1	75168646	75171629	Zfand2b	protein_coding	KNOWN	2984	960.473	-0.223715	-0.233807	0.111847	-2.00018	0.0454806	0.0900531	990.419	1094.86	1065.51	875.418	900.491	827.069	969.545
ENSMUSG00000026199.17	chr1	75192151	75199387	Ankzf1	protein_coding	KNOWN	7237	1187	-0.652466	-0.671871	0.109443	-5.96168	2.49652e-09	2.64231e-08	1546.52	1443.53	1533.28	975.039	973.043	991.471	846.123
ENSMUSG00000026200.13	chr1	75198236	75210813	Glb1l	protein_coding	KNOWN	12578	532.627	0.00313829	-0.00524235	0.125053	0.0250958	0.979979	0.987591	544.246	511.779	545.175	499.349	540.935	591.848	495.058
ENSMUSG00000026201.12	chr1	75210838	75215606	Stk16	protein_coding	KNOWN	4769	2588.41	0.278304	0.265331	0.0891853	3.12052	0.00180535	0.00569207	2376.36	2183.85	2401.75	2505.46	2766.56	2952.91	2931.95
ENSMUSG00000026202.13	chr1	75214228	75219865	Tuba4a	protein_coding	KNOWN	5638	27456.9	0.876757	0.889084	0.101511	8.63703	5.76919e-18	1.98718e-16	18966.7	17692.5	18740	28129.2	34002.1	37710	36957.9
ENSMUSG00000026203.16	chr1	75236406	75245692	Dnajb2	protein_coding	KNOWN	9287	4483.45	0.738616	0.750353	0.099365	7.43336	1.05875e-13	2.14074e-12	3141.54	3295.31	3240.83	4931.23	5321.86	6031.03	5422.32
ENSMUSG00000026204.15	chr1	75247027	75264502	Ptprn	protein_coding	KNOWN	17476	28577.8	0.795266	0.803312	0.117674	6.75821	1.39708e-11	2.13247e-10	20858.1	18439.7	20833.4	27896.3	34099.2	42912.7	35005.1
ENSMUSG00000026207.16	chr1	75375297	75432320	Speg	protein_coding	KNOWN	57024	9312.28	-0.126032	-0.130796	0.0768429	-1.64013	0.100979	0.174323	9766.24	9758.97	9867.38	9049.31	8662.43	8900.48	9181.19
ENSMUSG00000026208.9	chr1	75360329	75368579	Des	protein_coding	KNOWN	8251	80.5362	0.582367	0.62863	0.22706	2.56482	0.010323	0.0255834	62.5074	56.6473	64.9905	84.6777	108.827	85.9949	100.109
ENSMUSG00000026209.15	chr1	75307896	75317990	Dnpep	protein_coding	KNOWN	10095	1292.36	0.0790448	0.0984896	0.101381	0.779678	0.435581	0.551391	1240.45	1296.05	1190.11	1244.02	1363.54	1302.57	1409.75
ENSMUSG00000026211.17	chr1	75479310	75506452	Obsl1	protein_coding	KNOWN	27143	1971.71	0.43576	0.459798	0.118222	3.68594	0.000227862	0.000910805	1572.38	1699.42	1598.68	1874.12	2110.39	2496.38	2450.6
ENSMUSG00000026213.15	chr1	75521529	75537335	Stk11ip	protein_coding	KNOWN	15807	1444.47	-0.184923	-0.205191	0.0926574	-1.99577	0.0459587	0.0908266	1587.47	1482.6	1618.55	1332.43	1367.81	1393.62	1328.84
ENSMUSG00000026219.14	chr1	84721189	84840516	Trip12	protein_coding	KNOWN	119328	18168.4	0.170547	0.170531	0.0840468	2.02919	0.0424393	0.0849059	16995.5	16842.8	17020.5	18629.1	18878.3	20497.1	18315.8
ENSMUSG00000026220.6	chr1	84905898	84935134	Slc16a14	protein_coding	KNOWN	29237	361.574	-0.55409	-0.568586	0.153455	-3.61077	0.000305291	0.00117592	464.495	433.645	434.65	310.07	314.745	241.545	331.867
ENSMUSG00000026222.16	chr1	85649988	85709998	Sp100	protein_coding	KNOWN	60011	124.685	0.268332	0.279112	0.207577	1.29268	0.19612	0.296619	113.16	100.598	119.632	146.941	155.772	136.58	100.109
ENSMUSG00000026223.15	chr1	85894281	85908675	Itm2c	protein_coding	KNOWN	14395	42111	0.130181	0.12119	0.0894918	1.45467	0.145759	0.233951	40699.9	38607.1	41001.6	40147.2	44093.1	42510.6	47717.5
ENSMUSG00000026224.11	chr1	85928483	85940624	4933407L21Rik	protein_coding	KNOWN	12142	68.8339	0.00812664	0.00923231	0.243333	0.0333972	0.973358	0.98321	60.352	71.2975	74.0975	69.7346	55.4805	80.9364	69.9389
ENSMUSG00000026227.11	chr1	86045863	86055456	2810459M11Rik	protein_coding	KNOWN	9594	1337.82	0.288127	0.313773	0.102935	2.79912	0.00512414	0.0140059	1142.38	1268.7	1113.12	1508.01	1452.1	1536.53	1343.92
ENSMUSG00000026229.17	chr1	86064387	86139151	Psmd1	protein_coding	KNOWN	74765	7079.23	0.15923	0.170488	0.0873025	1.82389	0.0681686	0.125793	6394.08	6934.41	6488.7	7754.24	7883.57	6621.61	7477.97
ENSMUSG00000026234.12	chr1	86344719	86359400	Ncl	protein_coding	KNOWN	14682	19512.1	0.23859	0.247412	0.0728368	3.27567	0.00105411	0.00353847	17359.8	18097.8	17425.3	21641.4	21770.8	20259.4	20029.9
ENSMUSG00000026235.14	chr1	77367185	77515088	Epha4	protein_coding	KNOWN	147904	29012.6	-0.3023	-0.324421	0.0942879	-3.20613	0.00134531	0.00437817	34513.8	29867.8	33974.7	26882.7	26748	26494	24607.5
ENSMUSG00000026238.14	chr1	86526726	86530712	Ptma	protein_coding	KNOWN	3987	24077.4	1.2027	1.25221	0.123838	9.71187	2.68358e-22	1.31386e-20	13308.7	13646.1	13404.2	24704.7	28885.1	36612.3	37980.9
ENSMUSG00000026239.14	chr1	86542994	86582629	Pde6d	protein_coding	KNOWN	39636	1499.29	-0.180952	-0.181701	0.105864	-1.70929	0.0873974	0.154729	1585.32	1635.94	1602.82	1532.92	1409.42	1255.78	1472.83
ENSMUSG00000026240.12	chr1	86582904	86609375	Cops7b	protein_coding	KNOWN	26472	1539.78	0.16254	0.174566	0.0954508	1.70287	0.0885922	0.156649	1439.83	1456.23	1407.02	1637.52	1763.64	1515.03	1559.23
ENSMUSG00000026241.5	chr1	86666291	86670571	Nppc	protein_coding	KNOWN	4281	120.489	0.00791177	0.0273869	0.218528	0.0362048	0.971119	0.981904	140.103	98.6445	118.804	65.9988	108.827	149.227	161.819
ENSMUSG00000026245.16	chr1	78417975	78488897	Farsb	protein_coding	KNOWN	70923	3709.24	-0.0654565	-0.0631213	0.0933457	-0.701227	0.483161	0.596065	3823.73	3806.11	3776.9	3525.33	3700.12	3414.5	3917.95
ENSMUSG00000026247.13	chr1	87147655	87156521	Ecel1	protein_coding	KNOWN	8867	200.821	0.275362	0.306898	0.192312	1.43185	0.152186	0.241895	156.269	209.986	164.339	173.091	220.855	245.339	235.872
ENSMUSG00000026248.9	chr1	79776018	79781445	Mrpl44	protein_coding	KNOWN	5428	757.802	-0.612832	-0.621314	0.125335	-4.88956	1.01062e-06	6.785e-06	918.212	976.678	946.709	739.685	629.49	509.646	584.195
ENSMUSG00000026249.10	chr1	79794197	79861180	Serpine2	protein_coding	KNOWN	66984	10778.7	0.358744	0.369656	0.0869363	4.12652	3.683e-05	0.000177525	9408.44	9161.24	9141.72	11077.8	11595.4	11891.3	13174.6
ENSMUSG00000026254.17	chr1	87213914	87240488	Eif4e2	protein_coding	KNOWN	26575	3827.08	-0.0367381	-0.032293	0.0795834	-0.46163	0.644347	0.735795	3846.36	3940.9	3841.06	3827.93	3723.6	3817.92	3791.78
ENSMUSG00000026255.15	chr1	87264363	87310839	Efhd1	protein_coding	KNOWN	46477	516.869	0.30158	0.292214	0.120763	2.4973	0.0125145	0.0301276	489.282	410.205	474.803	550.405	569.742	562.761	560.882
ENSMUSG00000026259.14	chr1	87476834	87573870	Ngef	protein_coding	KNOWN	97037	6554.64	-5.12501e-06	0.0152492	0.0875005	-5.85712e-05	0.999953	0.999953	6427.49	6796.7	6321.05	6181.47	6574.44	6945.36	6635.97
ENSMUSG00000026260.12	chr1	92439010	92473860	Ndufa10	protein_coding	KNOWN	34851	6223.15	0.0827913	0.0843077	0.0998066	0.829518	0.406812	0.523356	5942.51	6091.54	6014.73	6160.3	6466.68	5853.98	7032.29
ENSMUSG00000026269.14	chr1	92910783	92924384	Rnpepl1	protein_coding	KNOWN	13602	1872.75	-0.505193	-0.514308	0.101884	-4.95853	7.10282e-07	4.91265e-06	2267.51	2239.52	2273.01	1698.54	1627.07	1604.82	1398.78
ENSMUSG00000026270.11	chr1	92934376	92947941	Capn10	protein_coding	KNOWN	13566	1370.49	-0.449619	-0.456063	0.109239	-4.11591	3.85651e-05	0.000184802	1598.25	1650.59	1616.07	1221.6	1160.82	1059.76	1286.33
ENSMUSG00000026271.15	chr1	92950865	92986391	Gpr35	protein_coding	KNOWN	35527	46.1394	-0.703388	-0.79776	0.271386	-2.59183	0.00954656	0.0239109	61.4297	68.3674	52.9859	36.1125	37.3427	37.9389	28.7984
ENSMUSG00000026273.13	chr1	93299211	93305915	Mterf4	protein_coding	KNOWN	6705	682.071	-0.51206	-0.516966	0.157083	-3.25981	0.00111486	0.003716	803.975	827.246	840.323	790.74	595.349	478.031	438.832
ENSMUSG00000026274.11	chr1	93308770	93343482	Pask	protein_coding	KNOWN	34713	240.427	-0.562437	-0.577917	0.165339	-3.40172	0.000669632	0.00237971	320.081	283.237	285.627	236.599	187.78	185.901	183.761
ENSMUSG00000026275.13	chr1	93342854	93373489	Ppp1r7	protein_coding	KNOWN	30636	7958.41	-0.119597	-0.110904	0.0837914	-1.42732	0.153487	0.243692	8170.15	8616.25	8142.86	7898.69	7748.07	7183.11	7949.72
ENSMUSG00000026276.17	chr1	93478964	93510260	Sept2	protein_coding	KNOWN	31297	5671.95	0.421745	0.421865	0.0847283	4.97762	6.43715e-07	4.51238e-06	4585.67	4868.74	4795.64	6897.5	6297.04	6266.25	5992.8
ENSMUSG00000026277.13	chr1	93619751	93658659	Stk25	protein_coding	KNOWN	38909	12659.3	0.156043	0.149538	0.0851748	1.83203	0.0669463	0.12392	12158.8	11476.9	12111.4	13365.4	13521.2	12398.4	13583.2
ENSMUSG00000026278.14	chr1	93685660	93695764	Bok	protein_coding	KNOWN	10105	4001.69	0.266833	0.272212	0.143757	1.85615	0.0634329	0.118772	3618.96	3484.79	3627.88	4141.74	4159.97	3539.7	5438.78
ENSMUSG00000026279.14	chr1	93701935	93754864	Thap4	protein_coding	KNOWN	52930	504.386	-0.339709	-0.334321	0.140004	-2.42642	0.0152485	0.0357161	581.966	580.147	553.868	544.179	465.183	369.272	436.089
ENSMUSG00000026280.17	chr1	93751500	93790610	Atg4b	protein_coding	KNOWN	39111	3910.95	-0.0979625	-0.0840877	0.0938574	-1.04374	0.296607	0.410368	4018.8	4151.86	3954.49	4248.83	4053.28	3338.63	3610.77
ENSMUSG00000026281.15	chr1	93792576	93801934	Dtymk	protein_coding	KNOWN	9359	1608.71	-0.176786	-0.175533	0.0945978	-1.86882	0.061648	0.1161	1713.57	1741.42	1709.21	1597.67	1499.04	1435.36	1564.71
ENSMUSG00000026283.13	chr1	93803965	93822101	Ing5	protein_coding	KNOWN	18137	1074.23	0.397065	0.416006	0.110312	3.59946	0.000318881	0.00122222	867.56	959.098	879.235	1131.94	1169.36	1315.22	1197.19
ENSMUSG00000026288.14	chr1	87620312	87720507	Inpp5d	protein_coding	KNOWN	100196	824.049	0.568398	0.568981	0.129479	4.3899	1.13404e-05	6.15402e-05	655.25	601.634	680.124	773.307	973.043	968.708	1116.28
ENSMUSG00000026289.15	chr1	87755870	87792428	Atg16l1	protein_coding	KNOWN	36559	4676.15	-0.0441444	-0.0407445	0.0977009	-0.451832	0.65139	0.742096	4743.02	4802.32	4709.95	4784.29	4375.49	5009.21	4308.78
ENSMUSG00000026303.6	chr1	90915085	90951142	Mlph	protein_coding	KNOWN	36058	85.6315	-0.223148	-0.242794	0.222618	-1.00238	0.316159	0.431552	95.9165	92.7844	93.1393	73.4704	90.6893	67.0255	86.3951
ENSMUSG00000026305.15	chr1	90998737	91128944	Lrrfip1	protein_coding	KNOWN	130208	5322.03	-0.0131235	-0.0136447	0.0847517	-0.154846	0.876942	0.917055	5407.97	5291.64	5352.82	5145.42	5484.04	5485.97	5086.34
ENSMUSG00000026307.12	chr1	91298338	91321075	Scly	protein_coding	KNOWN	22738	696.81	-0.173475	-0.169317	0.106623	-1.627	0.103738	0.178051	769.488	731.532	730.626	637.573	659.365	653.814	695.275
ENSMUSG00000026309.14	chr1	91373861	91398815	Ilkap	protein_coding	KNOWN	24955	2879.71	-0.0708549	-0.0784842	0.0915381	-0.774048	0.438902	0.554424	2918.45	2964.22	3025.99	3113.15	2846.58	2662.05	2627.51
ENSMUSG00000026311.16	chr1	91540544	91559589	Asb1	protein_coding	KNOWN	19046	3031.08	-0.0504473	-0.0410336	0.0914847	-0.551429	0.58134	0.684998	3055.32	3162.48	3023.51	3167.94	3107.98	2686.08	3014.23
ENSMUSG00000026312.17	chr1	109982431	110140157	Cdh7	protein_coding	KNOWN	157727	401.232	-0.146279	-0.144092	0.163129	-0.896709	0.369874	0.486983	384.744	476.619	411.469	338.711	376.627	466.649	353.808
ENSMUSG00000026313.15	chr1	91928779	92180341	Hdac4	protein_coding	KNOWN	251563	3156.05	-0.24659	-0.258464	0.109031	-2.26165	0.0237189	0.0519089	3529.51	3347.07	3570.75	3346.01	2849.78	2622.85	2826.35
ENSMUSG00000026315.13	chr1	107590006	107610484	Serpinb8	protein_coding	KNOWN	20479	389.677	-0.538746	-0.564483	0.183402	-2.93751	0.00330859	0.00962472	504.37	418.018	512.059	393.502	391.564	233.957	274.27
ENSMUSG00000026319.13	chr1	105663861	105755191	2310035C23Rik	protein_coding	KNOWN	91331	5584.19	-0.31631	-0.314328	0.10933	-2.89315	0.00381398	0.0108615	6262.6	6271.25	6328.92	5987.21	5357.07	4631.08	4251.19
ENSMUSG00000026321.7	chr1	105780718	105847981	Tnfrsf11a	protein_coding	KNOWN	67264	164.667	0.440088	0.477641	0.204666	2.15027	0.0315335	0.0657751	128.248	135.758	139.502	138.224	179.245	182.107	249.586
ENSMUSG00000026333.14	chr1	97770172	97793709	Gin1	protein_coding	KNOWN	23538	380.701	-0.903799	-0.9344	0.170348	-5.3056	1.12301e-07	9.1877e-07	543.168	521.546	505.022	301.353	298.741	194.753	300.326
ENSMUSG00000026335.16	chr1	97795114	98095646	Pam	protein_coding	KNOWN	300533	15153.5	0.404531	0.410394	0.0916031	4.41613	1.00485e-05	5.51642e-05	12681.5	12693.9	12890.1	14989.2	16036	18576.2	18207.4
ENSMUSG00000026339.18	chr1	121431049	121506460	Ccdc93	protein_coding	KNOWN	75412	2943.2	-0.437702	-0.435979	0.0881768	-4.96391	6.90893e-07	4.7828e-06	3462.69	3496.51	3416.76	2725.87	2592.65	2536.85	2371.06
ENSMUSG00000026341.16	chr1	125392905	125435727	Actr3	protein_coding	KNOWN	42823	23349.7	0.476734	0.496452	0.101056	4.71752	2.3874e-06	1.49035e-05	18822.3	19256.2	18654.8	22727.2	25871	29010.6	29105.5
ENSMUSG00000026342.10	chr1	125560595	125595820	Slc35f5	protein_coding	KNOWN	35226	1577.73	0.192525	0.216391	0.106467	1.80831	0.0705587	0.129589	1430.13	1531.43	1371.01	1730.91	1646.28	1520.09	1814.3
ENSMUSG00000026344.9	chr1	125867622	125913101	Lypd1	protein_coding	KNOWN	45480	4765.56	-0.391491	-0.392275	0.0896208	-4.36831	1.25214e-05	6.73388e-05	5484.49	5541.67	5521.71	3906.38	3883.64	4498.29	4522.71
ENSMUSG00000026347.13	chr1	127486546	127679548	Tmem163	protein_coding	KNOWN	193003	257.971	0.197371	0.217933	0.158975	1.24152	0.214413	0.318071	216.621	271.516	219.809	255.278	333.95	261.779	246.843
ENSMUSG00000026349.14	chr1	127774164	127808061	Ccnt2	protein_coding	KNOWN	33898	14123.2	0.353007	0.372667	0.133281	2.6486	0.00808267	0.0207313	12198.6	11826.6	12236.8	20022.5	15731.9	14380.1	12465.6
ENSMUSG00000026353.9	chr1	128243964	128279378	Ubxn4	protein_coding	KNOWN	35415	5911.32	0.169642	0.181681	0.0847263	2.00223	0.0452595	0.0897065	5487.72	5571.95	5411.18	6675.84	6596.85	5933.65	5702.08
ENSMUSG00000026354.8	chr1	128284756	128328318	Lct	protein_coding	KNOWN	43563	3278.27	-1.13031	-1.15394	0.157489	-7.1771	7.12068e-13	1.3012e-11	4809.84	4694.89	4844.9	2943.8	2250.16	1894.42	1509.86
ENSMUSG00000026355.11	chr1	128331590	128359664	Mcm6	protein_coding	KNOWN	28075	568.044	-0.603293	-0.611142	0.12816	-4.70735	2.50959e-06	1.55727e-05	673.571	759.855	689.644	461.992	460.915	513.44	416.891
ENSMUSG00000026356.15	chr1	128363707	128417368	Dars	protein_coding	KNOWN	53662	4046.91	-0.0605646	-0.0641396	0.0923286	-0.655968	0.511845	0.62335	4113.63	4159.67	4176.78	3958.68	3900.71	3730.66	4288.21
ENSMUSG00000026360.9	chr1	143999338	144004161	Rgs2	protein_coding	KNOWN	4824	13372.4	2.62256	3.6232	0.364945	7.18618	6.66306e-13	1.22332e-11	1697.4	1932.85	1740.26	8087.97	16716.7	32684.4	30747
ENSMUSG00000026361.8	chr1	143598800	143702893	Cdc73	protein_coding	KNOWN	104094	5182.52	-0.0505845	-0.0363662	0.087406	-0.578731	0.562771	0.668481	5120.22	5545.58	5106.1	5702.05	5077.53	4868.83	4857.32
ENSMUSG00000026365.15	chr1	140084708	140183764	Cfh	protein_coding	KNOWN	99057	1431.46	0.308571	0.294577	0.121664	2.53626	0.0112042	0.0274317	1321.28	1133.92	1347	1598.91	1732.7	1515.03	1371.35
ENSMUSG00000026374.14	chr1	118294778	118311739	Tsn	protein_coding	KNOWN	16962	4890.46	-0.188606	-0.186202	0.0798253	-2.36274	0.0181405	0.041303	5266.79	5281.87	5213.31	4799.23	4554.74	4510.94	4606.37
ENSMUSG00000026377.12	chr1	118321839	118333822	Nifk	protein_coding	KNOWN	11984	2032.27	-0.111138	-0.0976383	0.138937	-0.799915	0.42376	0.540161	2028.26	2211.2	2094.18	2593.88	1995.16	1483.41	1819.78
ENSMUSG00000026380.10	chr1	118627945	118685168	Tfcp2l1	protein_coding	KNOWN	57224	481.223	0.140339	0.165308	0.127471	1.10095	0.270916	0.382333	450.484	475.642	423.887	509.311	450.246	548.85	510.142
ENSMUSG00000026383.14	chr1	119545037	119649000	Epb41l5	protein_coding	KNOWN	103964	672.958	0.201602	0.203304	0.127382	1.58266	0.113499	0.191276	585.199	644.607	628.38	625.121	731.916	787.865	707.617
ENSMUSG00000026384.13	chr1	119652467	119837613	Ptpn4	protein_coding	KNOWN	185147	7577.2	-0.0697618	-0.0663232	0.0969123	-0.719845	0.47162	0.585864	7666.86	7963.83	7699.93	8095.44	6916.93	7662.4	7035.03
ENSMUSG00000026385.16	chr1	120113280	120121078	Dbi	protein_coding	KNOWN	7799	4948.67	0.404616	0.41908	0.124705	3.2446	0.00117615	0.00389359	4158.9	4171.39	4118	5276.17	5251.44	4923.21	6741.56
ENSMUSG00000026387.15	chr1	120006894	120063536	Sctr	protein_coding	KNOWN	56643	58.6357	0.159676	0.181715	0.250915	0.636375	0.524532	0.634237	57.1188	50.7872	55.4696	65.9988	48.012	64.4962	68.5675
ENSMUSG00000026388.15	chr1	120121187	120188189	3110009E18Rik	protein_coding	KNOWN	67003	107.21	-0.245049	-0.248567	0.203322	-1.20522	0.228117	0.333981	120.704	124.038	108.869	99.6208	89.6224	91.0535	116.565
ENSMUSG00000026389.16	chr1	120190757	120272705	Steap3	protein_coding	KNOWN	81949	360.685	0.335265	0.326016	0.141562	2.36833	0.0178688	0.0407737	329.78	281.283	334.059	359.88	396.899	454.003	368.893
ENSMUSG00000026393.10	chr1	138482875	138620141	Nek7	protein_coding	KNOWN	137267	2839.87	0.114736	0.1263	0.100727	1.13908	0.254669	0.36399	2682.43	2767.91	2645.98	3050.89	2647.06	2923.83	3160.96
ENSMUSG00000026395.16	chr1	138062861	138175708	Ptprc	protein_coding	KNOWN	112848	288.55	0.340346	0.357595	0.139649	2.43716	0.0148032	0.0347986	247.874	254.913	242.99	313.806	310.478	343.98	305.811
ENSMUSG00000026399.12	chr1	130439027	130462744	Cd55	protein_coding	KNOWN	23718	181.801	0.129013	0.130804	0.170082	0.758531	0.448133	0.563024	184.289	159.198	173.86	180.563	211.253	178.313	185.132
ENSMUSG00000026404.12	chr1	136415271	136440158	Ddx59	protein_coding	KNOWN	24888	385.38	0.0337865	0.027824	0.12684	0.26637	0.789954	0.85107	339.48	416.065	387.873	415.917	404.368	354.097	379.864
ENSMUSG00000026405.14	chr1	130634773	130661632	C4bp	protein_coding	KNOWN	26860	54.9818	0.129243	0.150406	0.280077	0.461453	0.644474	0.735886	48.4971	53.7173	52.9859	63.5083	60.8152	35.4097	69.9389
ENSMUSG00000026409.14	chr1	130689182	130729253	Pfkfb2	protein_coding	KNOWN	40072	2314.11	-0.252472	-0.266284	0.0949628	-2.65864	0.00784575	0.0202069	2617.77	2449.51	2614.94	2126.9	2201.08	2204.25	1984.34
ENSMUSG00000026411.17	chr1	136008150	136035342	Tmem9	protein_coding	KNOWN	27193	3571.37	-0.122279	-0.123747	0.103267	-1.1841	0.236375	0.343775	3848.52	3652.78	3740.89	3352.24	3548.62	3105.93	3750.64
ENSMUSG00000026413.12	chr1	135871395	135919207	Pkp1	protein_coding	KNOWN	47813	63.5639	-0.457771	-0.635204	0.367919	-1.24422	0.213419	0.316903	118.549	24.4169	96.4509	69.7346	61.8821	34.145	39.7692
ENSMUSG00000026414.13	chr1	135836354	135852260	Tnnt2	protein_coding	KNOWN	15907	69.7661	0.451099	0.502689	0.276538	1.63124	0.10284	0.176782	37.72	95.7144	35.5999	78.4514	86.4216	87.2596	67.1962
ENSMUSG00000026421.14	chr1	135720061	135752232	Csrp1	protein_coding	KNOWN	32172	10022.8	0.484082	0.501639	0.0967599	5.00292	5.64681e-07	3.99978e-06	7894.25	8408.22	7993	10661.9	10571.2	11974.8	12656.2
ENSMUSG00000026424.8	chr1	135160234	135167681	Gpr37l1	protein_coding	KNOWN	7448	12023.1	0.309966	0.309127	0.0827344	3.74652	0.000179307	0.000732905	10671.5	10362.6	10701.9	12044.2	12773.3	14196.8	13411.8
ENSMUSG00000026425.15	chr1	131285251	131527352	Srgap2	protein_coding	KNOWN	242102	5671.37	0.0664872	0.0557976	0.088169	0.754089	0.450796	0.565593	5639.68	5328.75	5670.73	5658.46	5914.01	6043.67	5444.26
ENSMUSG00000026426.10	chr1	135146824	135156269	Arl8a	protein_coding	KNOWN	9446	10091.5	-0.0254868	-0.0237587	0.0912061	-0.279442	0.779906	0.843102	10015.2	10403.6	10141	9845.03	10186	9303.89	10745.9
ENSMUSG00000026427.16	chr1	131153181	131187658	Eif2d	protein_coding	KNOWN	34478	2640.12	-0.0446901	-0.0474607	0.0924046	-0.483635	0.628645	0.723811	2652.25	2706.37	2710.97	2790.63	2684.4	2591.23	2345.01
ENSMUSG00000026429.8	chr1	134962565	134974162	Ube2t	protein_coding	KNOWN	11598	148.767	0.531083	0.569965	0.196566	2.70181	0.00689642	0.0181185	114.238	115.248	120.046	145.695	152.571	227.634	165.933
ENSMUSG00000026430.15	chr1	131176410	131245258	Rassf5	protein_coding	KNOWN	68849	987.499	-0.0976051	-0.0885974	0.106342	-0.91784	0.358703	0.475693	1057.24	1015.74	993.899	906.55	1027.46	926.975	984.63
ENSMUSG00000026433.13	chr1	131867224	131872887	Rab29	protein_coding	KNOWN	5664	226.953	0.0980936	0.0954395	0.156547	0.626608	0.530916	0.639795	213.387	215.846	226.018	207.958	235.792	226.369	263.299
ENSMUSG00000026434.12	chr1	131910534	131936321	Nucks1	protein_coding	KNOWN	25788	12082.6	0.0144374	0.0152405	0.0867135	0.166495	0.867767	0.910273	12062.9	11968.2	11998	12975.6	11611.4	12315	11646.9
ENSMUSG00000026436.15	chr1	132007607	132032612	Elk4	protein_coding	KNOWN	25006	3189.52	0.965593	1.02936	0.159819	6.04178	1.52423e-09	1.67341e-08	2031.49	1973.87	1994.01	2871.57	3640.38	5730.05	4085.25
ENSMUSG00000026437.11	chr1	132112237	132139684	Cdk18	protein_coding	KNOWN	27448	1222.94	-0.246687	-0.241463	0.101424	-2.43223	0.0150061	0.0352278	1315.89	1396.65	1310.57	1087.11	1222.71	1147.02	1080.62
ENSMUSG00000026439.14	chr1	132477365	132505659	Rbbp5	protein_coding	KNOWN	28295	4372.68	-1.0201	-1.03055	0.12425	-8.21004	2.21111e-16	6.35144e-15	6134.35	6192.14	6193.97	3845.36	3122.91	2574.79	2545.23
ENSMUSG00000026442.14	chr1	132564690	132741797	Nfasc	protein_coding	KNOWN	177108	16041.7	0.0998277	0.088952	0.105071	0.950098	0.342062	0.458429	15943.7	14547.6	15946.3	15167.3	16126.7	19194.6	15366
ENSMUSG00000026443.3	chr1	132880273	132940005	Lrrn2	protein_coding	KNOWN	59733	9077.57	-0.806697	-0.831063	0.107763	-7.48583	7.10975e-14	1.47001e-12	12306.4	11521.9	12492.7	7332.09	7187.93	5794.54	6907.49
ENSMUSG00000026447.16	chr1	133045667	133108687	Pik3c2b	protein_coding	KNOWN	63021	1257.58	-0.372999	-0.399095	0.134158	-2.78031	0.00543074	0.0147327	1471.08	1379.07	1527.07	1075.9	1055.2	1343.04	951.717
ENSMUSG00000026452.15	chr1	134646677	134762593	Syt2	protein_coding	KNOWN	115917	464.814	0.131522	0.106715	0.125273	1.04988	0.293772	0.407387	426.775	426.808	482.254	478.18	444.911	529.881	464.888
ENSMUSG00000026455.14	chr1	134455531	134491018	Klhl12	protein_coding	KNOWN	35488	3163.84	0.118502	0.131921	0.10395	1.13999	0.254291	0.36365	2997.12	3019.89	2982.11	3643.63	3678.79	2780.92	3044.4
ENSMUSG00000026456.18	chr1	134405559	134411740	Cyb5r1	protein_coding	KNOWN	6182	1074.81	0.0171556	0.0125097	0.118799	0.144408	0.885179	0.922755	1132.68	996.211	1079.59	1003.68	1117.08	987.677	1206.79
ENSMUSG00000026457.14	chr1	134415378	134433351	Adipor1	protein_coding	KNOWN	17974	4017.7	0.0186474	0.0202996	0.0915785	0.203621	0.838649	0.888468	3987.54	3987.78	3980.98	3866.53	3967.92	3906.45	4426.72
ENSMUSG00000026458.13	chr1	134296783	134332928	Ppfia4	protein_coding	KNOWN	36146	10656.8	0.150041	0.144885	0.0813641	1.84407	0.0651728	0.121286	9921.43	10020.7	10208.1	10477.6	10831.5	11319.7	11818.3
ENSMUSG00000026463.17	chr1	133699457	133801041	Atp2b4	protein_coding	KNOWN	101585	9183.71	-0.0342241	-0.0115185	0.115813	-0.295511	0.767604	0.833781	8537.65	10430.9	8708.31	8354.45	8637.89	9902.06	9714.65
ENSMUSG00000026466.16	chr1	156004599	156036480	Tor1aip1	protein_coding	KNOWN	31882	2547.62	0.669132	0.676648	0.0884806	7.56247	3.95485e-14	8.38871e-13	1915.1	1875.22	1905.01	2806.82	2999.15	3227.34	3104.74
ENSMUSG00000026469.14	chr1	155275701	155417415	Xpr1	protein_coding	KNOWN	141715	14594	-0.0636342	-0.0619031	0.0899847	-0.707166	0.479463	0.592771	15042.7	14878.7	14937.1	13682.9	13493.5	16010.2	14112.6
ENSMUSG00000026470.14	chr1	155158715	155208256	Stx6	protein_coding	KNOWN	49542	6073.73	-0.11842	-0.105176	0.078896	-1.50096	0.133366	0.217718	6332.65	6497.84	6153.4	6095.55	5782.78	5913.42	5740.47
ENSMUSG00000026471.14	chr1	155127277	155146814	Mr1	protein_coding	KNOWN	19538	385.763	0.285882	0.285697	0.126167	2.2659	0.0234573	0.0514303	348.102	331.094	349.376	399.729	434.242	423.652	414.148
ENSMUSG00000026473.15	chr1	153899944	153909723	Glul	protein_coding	KNOWN	9780	76986.2	0.346156	0.348902	0.096347	3.5928	0.00032714	0.00125172	68060.9	63641.3	68030.6	70375.9	80489.4	92652	95653.1
ENSMUSG00000026475.7	chr1	153740349	153745468	Rgs16	protein_coding	KNOWN	5120	399.597	0.961929	1.07638	0.219494	4.38248	1.17334e-05	6.34738e-05	242.486	250.03	241.334	271.467	473.718	581.73	736.415
ENSMUSG00000026478.14	chr1	153218922	153332786	Lamc1	protein_coding	KNOWN	113865	4522.06	0.694365	0.702883	0.120968	5.74008	9.46336e-09	9.18548e-08	3378.63	3204.48	3401.45	4755.65	5592.86	6376.27	4945.09
ENSMUSG00000026479.13	chr1	153122756	153186447	Lamc2	protein_coding	KNOWN	63692	84.7983	0.0451682	0.0532859	0.226491	0.199426	0.84193	0.890678	73.2845	96.6911	79.0649	82.1872	84.2877	99.9059	78.167
ENSMUSG00000026480.12	chr1	152800194	152836991	Ncf2	protein_coding	KNOWN	36798	284.349	1.01922	1.05684	0.149595	6.81317	9.54727e-12	1.48345e-10	199.377	156.268	171.79	321.277	380.895	376.86	383.978
ENSMUSG00000026482.13	chr1	152516760	152766351	Rgl1	protein_coding	KNOWN	249592	8716.23	-0.258103	-0.255506	0.0781549	-3.30245	0.000958437	0.00325735	9619.67	9680.83	9521.32	8124.08	7768.34	7984.88	8314.5
ENSMUSG00000026483.13	chr1	151571186	151721939	Fam129a	protein_coding	KNOWN	150754	237.569	0.25639	0.264112	0.162567	1.57714	0.114764	0.193018	198.299	226.589	214.427	226.637	298.741	254.191	244.1
ENSMUSG00000026484.13	chr1	151458004	151500955	Rnf2	protein_coding	KNOWN	42952	3099.71	0.012215	0.0307295	0.105236	0.116072	0.907595	0.937959	2886.12	3302.15	2997.84	3852.84	3269.08	2626.64	2763.27
ENSMUSG00000026489.13	chr1	180165238	180199602	Adck3	protein_coding	KNOWN	34365	2372.33	-0.333731	-0.339038	0.101548	-3.28643	0.00101468	0.00342456	2681.35	2708.33	2694.83	2028.53	2274.7	1962.71	2255.87
ENSMUSG00000026490.17	chr1	179960472	180165603	Cdc42bpa	protein_coding	KNOWN	205132	28303.8	0.163295	0.166791	0.0862371	1.89356	0.0582836	0.110647	26596.9	26319.5	26437.5	29449.2	27398.8	32340.4	29584.1
ENSMUSG00000026491.13	chr1	179744894	179803680	Ahctf1	protein_coding	KNOWN	58787	6580.23	0.217867	0.242513	0.12584	1.73131	0.0833965	0.148729	5895.1	6137.44	5838.8	8953.42	7116.44	6495.15	5625.28
ENSMUSG00000026492.11	chr1	179528055	179546267	Tfb2m	protein_coding	KNOWN	18213	790.768	-0.499188	-0.496851	0.13958	-3.57635	0.000348421	0.0013263	951.621	999.141	895.379	769.571	582.545	600.7	736.415
ENSMUSG00000026494.12	chr1	178529125	178939200	Kif26b	protein_coding	KNOWN	410076	4362.83	-0.591166	-0.58723	0.110698	-5.34036	9.27632e-08	7.70256e-07	5386.41	5483.07	5310.59	3179.15	3212.54	4284.57	3683.45
ENSMUSG00000026495.8	chr1	178406085	178484513	Efcab2	protein_coding	KNOWN	78429	983.263	0.234443	0.244863	0.100704	2.32805	0.0199096	0.0448066	853.549	939.564	874.681	1102.06	1037.06	1059.76	1016.17
ENSMUSG00000026496.11	chr1	180568924	180601254	Parp1	protein_coding	KNOWN	32331	8758.57	0.237086	0.223616	0.0982438	2.41324	0.0158115	0.0367896	8282.23	7383.68	8312.58	9827.59	9714.43	8543.85	9245.64
ENSMUSG00000026499.5	chr1	180726043	180754204	Acbd3	protein_coding	KNOWN	28162	2399.84	-0.291655	-0.286242	0.113475	-2.57021	0.0101638	0.0252376	2694.28	2674.14	2656.33	2606.33	2270.43	1869.13	2028.23
ENSMUSG00000026502.13	chr1	178187417	178257301	Desi2	protein_coding	KNOWN	69885	2707.61	-0.077865	-0.0520535	0.132157	-0.589185	0.555737	0.661944	2732	2862.64	2696.07	3522.84	2776.16	2146.08	2217.47
ENSMUSG00000026504.17	chr1	176814660	177020437	Sdccag8	protein_coding	KNOWN	205778	2044.97	-0.0588982	-0.0583698	0.0909446	-0.647628	0.517226	0.62761	2072.44	2115.48	2089.22	1894.04	2019.7	2109.41	2014.51
ENSMUSG00000026509.15	chr1	182467260	182517608	Capn2	protein_coding	KNOWN	50349	3335.89	0.118385	0.116182	0.0920027	1.28676	0.198178	0.299063	3180.33	3153.69	3216	3114.4	3505.94	3618.11	3562.77
ENSMUSG00000026510.10	chr1	182409172	182462432	Trp53bp2	protein_coding	KNOWN	53261	2995.25	0.158183	0.155907	0.091366	1.73132	0.0833954	0.148729	2880.73	2718.09	2836.81	2847.91	3222.14	3258.96	3202.1
ENSMUSG00000026511.7	chr1	182124737	182132407	Srp9	protein_coding	KNOWN	7671	2549.35	0.227691	0.245478	0.109048	2.08799	0.0367989	0.07498	2328.94	2358.68	2227.48	2781.91	2707.88	2416.71	3023.83
ENSMUSG00000026514.14	chr1	181352628	181460641	Cnih3	protein_coding	KNOWN	108014	4971.88	-0.535939	-0.524509	0.106839	-5.01634	5.26653e-07	3.76468e-06	5695.72	6637.5	5728.27	3947.48	4015.94	4173.28	4604.99
ENSMUSG00000026516.8	chr1	181087138	181144204	Nvl	protein_coding	KNOWN	57067	5306.79	-0.0650161	-0.0636096	0.106748	-0.609062	0.542483	0.650569	5497.42	5407.87	5417.39	5631.07	5124.48	5531.5	4537.8
ENSMUSG00000026519.16	chr1	180942344	180975112	Tmem63a	protein_coding	KNOWN	32769	636.237	0.463315	0.476389	0.124842	3.71122	0.000206262	0.000831943	516.225	525.453	518.268	791.986	651.896	760.044	689.789
ENSMUSG00000026520.8	chr1	180904293	180908088	Pycr2	protein_coding	KNOWN	3796	1091.08	-0.762095	-0.782326	0.119084	-6.39964	1.55746e-10	1.99081e-09	1444.14	1392.74	1465.39	970.058	843.944	725.898	795.383
ENSMUSG00000026526.14	chr1	175600374	175625635	Fh1	protein_coding	KNOWN	25262	4868.98	0.256798	0.262215	0.103421	2.48302	0.0130272	0.0311983	4190.15	4541.55	4381.68	4888.89	5060.46	5119.23	5900.92
ENSMUSG00000026527.13	chr1	175059087	175492500	Rgs7	protein_coding	KNOWN	433414	5395.82	-0.0350652	-0.0242713	0.0843643	-0.41564	0.677673	0.763437	5484.49	5519.21	5339.57	5050.78	5259.98	5388.59	5728.13
ENSMUSG00000026544.6	chr1	172630764	172632962	Dusp23	protein_coding	KNOWN	2199	140.802	-0.522511	-0.565176	0.198472	-2.63267	0.00847165	0.0216328	175.667	163.105	179.655	92.1493	133.367	110.023	131.65
ENSMUSG00000026546.16	chr1	172520801	172545870	Cfap45	protein_coding	KNOWN	25070	67.5263	-0.389506	-0.437433	0.255799	-1.5227	0.127833	0.210517	80.8285	79.1109	78.237	62.263	69.3506	64.4962	38.3978
ENSMUSG00000026547.15	chr1	172500047	172507380	Tagln2	protein_coding	KNOWN	7334	736.556	0.571175	0.591776	0.137639	4.14979	3.32779e-05	0.000162009	573.344	561.59	578.291	694.855	833.275	1054.7	859.837
ENSMUSG00000026553.17	chr1	172082529	172122330	Copa	protein_coding	KNOWN	39802	13325	0.016926	0.00731083	0.0885572	0.191131	0.848423	0.895243	13677.3	12649	13532.9	12636.9	13805	14132.3	12841.3
ENSMUSG00000026554.15	chr1	172148084	172197005	Dcaf8	protein_coding	KNOWN	48922	9094.91	-0.234526	-0.228729	0.0739067	-3.17328	0.00150728	0.00485352	9853.54	10139.9	9786.25	8557.43	8663.5	8346.57	8317.24
ENSMUSG00000026556.15	chr1	172000960	172028444	Vangl2	protein_coding	KNOWN	27485	1679.3	-0.891702	-0.896405	0.100616	-8.86246	7.82694e-19	2.88762e-17	2290.14	2321.56	2237.41	1302.54	1145.89	1282.34	1175.25
ENSMUSG00000026558.13	chr1	167222883	167285320	Uck2	protein_coding	KNOWN	62438	1755.42	-0.687372	-0.692534	0.103185	-6.66155	2.70964e-11	3.97954e-10	2174.83	2341.1	2217.13	1397.18	1298.46	1511.23	1348.04
ENSMUSG00000026563.13	chr1	166379097	166393621	Tada1	protein_coding	KNOWN	14525	1085.37	-0.295143	-0.292584	0.126887	-2.32603	0.0200168	0.0449781	1190.87	1241.36	1205.43	1184.24	1039.19	954.797	781.67
ENSMUSG00000026565.18	chr1	165865154	166002678	Pou2f1	protein_coding	KNOWN	137525	2050.73	-0.14192	-0.14491	0.123503	-1.14912	0.250505	0.35959	2144.65	2197.53	2165.38	1973.74	1951.42	2254.84	1667.56
ENSMUSG00000026566.15	chr1	165592240	165634538	Mpzl1	protein_coding	KNOWN	42299	1693.64	0.0278356	0.0185114	0.106054	0.262466	0.792962	0.853129	1668.3	1652.54	1722.87	1698.54	1604.67	1909.59	1598.99
ENSMUSG00000026567.16	chr1	165485183	165576774	Adcy10	protein_coding	KNOWN	91592	141.9	-0.110039	-0.0977506	0.219054	-0.502339	0.615429	0.713342	157.346	147.478	137.432	130.752	93.8901	194.753	131.65
ENSMUSG00000026568.6	chr1	165460637	165481214	Mpc2	protein_coding	KNOWN	20578	3612.99	0.0787743	0.0771389	0.115636	0.68123	0.495726	0.608145	3470.24	3503.34	3535.57	3695.93	3603.03	3241.25	4241.59
ENSMUSG00000026571.12	chr1	165328698	165460475	Dcaf6	protein_coding	KNOWN	131778	8227.23	0.051671	0.0672705	0.0814885	0.634089	0.526023	0.635642	7813.43	8449.24	7763.67	8564.9	8236.72	8166.99	8595.62
ENSMUSG00000026575.15	chr1	164304121	164437725	Nme7	protein_coding	KNOWN	133605	885.868	-0.189962	-0.163951	0.114604	-1.65755	0.0974078	0.169193	945.155	1012.81	873.439	787.005	817.271	823.275	942.118
ENSMUSG00000026576.12	chr1	164437109	164458355	Atp1b1	protein_coding	KNOWN	21247	106382	0.472724	0.468842	0.0825664	5.72537	1.03207e-08	9.94939e-08	88449.1	84582.3	88686.8	112839	125985	122700	121433
ENSMUSG00000026577.13	chr1	164289800	164307489	Blzf1	protein_coding	KNOWN	17690	1232.91	-0.177035	-0.166807	0.124255	-1.42477	0.154223	0.244616	1282.48	1346.84	1315.54	1468.16	1249.38	1006.65	961.317
ENSMUSG00000026578.6	chr1	164275585	164287847	Ccdc181	protein_coding	KNOWN	12263	1030.62	-0.518728	-0.527618	0.11529	-4.49934	6.81632e-06	3.86888e-05	1302.96	1193.5	1251.38	967.567	881.287	786.601	831.038
ENSMUSG00000026579.8	chr1	164151838	164220277	F5	protein_coding	KNOWN	68440	52.4443	-0.103077	-0.117291	0.263263	-0.391537	0.6954	0.777779	54.9634	51.7639	57.9533	58.5272	60.8152	39.2036	43.8832
ENSMUSG00000026584.14	chr1	163929100	163955126	Scyl3	protein_coding	KNOWN	26027	1525.42	-0.38439	-0.382347	0.107165	-3.58688	0.000334654	0.00127796	1779.31	1777.55	1721.63	1419.6	1283.52	1459.38	1236.96
ENSMUSG00000026585.13	chr1	163779583	163917109	Kifap3	protein_coding	KNOWN	137527	17601.5	0.00447241	-0.0029731	0.0820979	0.0544765	0.956555	0.97223	18008.6	16992.2	17865.8	16849.6	18354.4	17305.2	17834.4
ENSMUSG00000026586.16	chr1	163245119	163313710	Prrx1	protein_coding	KNOWN	68592	627.009	0.153552	0.140009	0.114891	1.3365	0.181384	0.278663	561.489	596.75	619.273	721.006	642.294	646.227	602.023
ENSMUSG00000026587.15	chr1	158362273	158691781	Astn1	protein_coding	KNOWN	329509	21088.6	-0.0110393	-0.0338835	0.087682	-0.125902	0.899809	0.932574	22314.1	19512.1	22290.1	18703.8	21249	22104.5	21446.6
ENSMUSG00000026589.14	chr1	157506728	157568425	Sec16b	protein_coding	KNOWN	61698	56.2463	0.201963	0.222643	0.250619	0.805855	0.420326	0.536618	53.8857	48.8339	51.3301	52.3009	64.016	65.7608	57.5967
ENSMUSG00000026594.14	chr1	156804166	156939626	Ralgps2	protein_coding	KNOWN	135461	5023.45	-0.429665	-0.425076	0.0831008	-5.1704	2.33591e-07	1.78711e-06	5849.83	5988.99	5804.44	4723.27	4567.54	4120.17	4109.94
ENSMUSG00000026596.13	chr1	156558786	156649568	Abl2	protein_coding	KNOWN	90783	9234.47	-0.13163	-0.133498	0.109155	-1.2059	0.227857	0.333757	9691.88	9597.81	9887.25	10607.1	8897.15	7862.21	8097.82
ENSMUSG00000026600.12	chr1	156424525	156474331	Soat1	protein_coding	KNOWN	49807	3376.68	0.20373	0.199689	0.0932109	2.18569	0.028838	0.0610357	3215.9	2968.12	3153.9	3654.84	3592.36	3719.28	3332.38
ENSMUSG00000026603.13	chr1	189880492	189922363	Smyd2	protein_coding	KNOWN	41872	2132.01	0.137786	0.140856	0.111012	1.24118	0.214537	0.318138	1989.46	2037.35	2015.12	2150.56	2192.55	2017.09	2521.91
ENSMUSG00000026604.17	chr1	189728268	189876695	Ptpn14	protein_coding	KNOWN	148428	1361.66	-0.153499	-0.160304	0.118178	-1.29888	0.193986	0.29402	1474.31	1384.93	1486.92	1453.22	1398.75	1095.17	1238.33
ENSMUSG00000026605.14	chr1	189640606	189688086	Cenpf	protein_coding	KNOWN	47481	147.896	0.115133	0.121233	0.199455	0.57724	0.563777	0.669268	145.491	133.805	143.227	166.865	126.965	185.901	133.021
ENSMUSG00000026608.12	chr1	188971095	189007841	Kctd3	protein_coding	KNOWN	36747	6051.91	-0.125168	-0.117386	0.086475	-1.44744	0.147772	0.236524	6281.99	6502.72	6219.63	6154.08	5792.38	5425.27	5987.32
ENSMUSG00000026610.13	chr1	187608791	188214885	Esrrg	protein_coding	KNOWN	606095	807.744	0.0120127	0.0243633	0.12414	0.0967678	0.922911	0.948937	728.535	906.357	764.984	785.759	835.409	878.919	754.243
ENSMUSG00000026614.6	chr1	185454848	185468762	Slc30a10	protein_coding	KNOWN	13915	1315.71	-0.305118	-0.307795	0.101367	-3.01004	0.00261213	0.00785861	1464.61	1486.5	1482.78	1333.67	1241.91	1111.61	1088.85
ENSMUSG00000026615.14	chr1	185363044	185428360	Eprs	protein_coding	KNOWN	65317	11570.1	0.816678	0.851918	0.13592	6.00851	1.87239e-09	2.0146e-08	8097.94	7652.27	8024.88	10638.3	13402.8	18540.8	14633.7
ENSMUSG00000026617.16	chr1	185332149	185357777	Bpnt1	protein_coding	KNOWN	25629	3253.37	0.227437	0.242087	0.100882	2.25449	0.0241653	0.0526563	2937.85	2970.08	2929.54	3068.32	3164.52	3814.13	3889.15
ENSMUSG00000026618.11	chr1	185284726	185329396	Iars2	protein_coding	KNOWN	44671	2923.85	-0.267179	-0.267552	0.0826608	-3.23224	0.00122825	0.0040437	3250.39	3238.66	3221.79	2654.9	2729.21	2627.9	2744.07
ENSMUSG00000026620.11	chr1	184896789	184999570	Mark1	protein_coding	KNOWN	102782	4450.21	-0.0938242	-0.100346	0.0790442	-1.18698	0.235234	0.342468	4690.21	4511.27	4682.21	4104.38	4241.06	4416.09	4506.26
ENSMUSG00000026622.15	chr1	191821444	191833050	Nek2	protein_coding	KNOWN	11607	44.399	-0.595484	-0.711555	0.31105	-1.91443	0.0555647	0.106354	49.5748	65.4374	56.2975	51.0557	24.5395	39.2036	24.6843
ENSMUSG00000026623.16	chr1	191717834	191784255	Lpgat1	protein_coding	KNOWN	66422	11500.8	-0.149642	-0.147035	0.0758866	-1.97192	0.0486188	0.0952373	12118.9	12302.2	12103.6	11516.2	11200.7	10711.4	10552.5
ENSMUSG00000026626.11	chr1	191351975	191403272	Ppp2r5a	protein_coding	KNOWN	51298	5779.28	0.653131	0.673386	0.0759085	8.60419	7.68599e-18	2.61273e-16	4188	4554.25	4197.48	7233.72	7183.66	6531.82	6566.03
ENSMUSG00000026627.7	chr1	191325912	191350914	Tmem206	protein_coding	KNOWN	25003	451.284	-0.648723	-0.669659	0.126938	-5.11057	3.21194e-07	2.3984e-06	567.955	566.473	584.087	403.464	369.159	325.01	342.838
ENSMUSG00000026628.13	chr1	191170296	191218039	Atf3	protein_coding	KNOWN	47744	9885.32	5.72699	7.57532	0.339616	16.8632	8.39678e-64	3.04022e-61	86.2171	93.7611	91.0695	7802.8	17137.1	24909.4	19076.9
ENSMUSG00000026632.17	chr1	191045826	191062932	Tatdn3	protein_coding	KNOWN	17107	742.164	-0.159525	-0.162674	0.105821	-1.50749	0.131685	0.215584	811.519	769.622	789.821	672.441	723.381	705.664	722.702
ENSMUSG00000026634.16	chr1	190925112	190946962	Angel2	protein_coding	KNOWN	21851	3947.16	-7.63199e-05	0.0149831	0.102765	-0.000742663	0.999407	0.999536	3956.29	3994.61	3820.37	4576.33	3944.45	3802.75	3535.34
ENSMUSG00000026637.13	chr1	191997205	192092559	Traf5	protein_coding	KNOWN	95355	99.0728	0.731328	0.784467	0.214655	3.407	0.000656812	0.00233949	63.5851	72.2742	74.5114	127.017	114.162	139.109	102.851
ENSMUSG00000026639.18	chr1	193207699	193343878	Lamb3	protein_coding	KNOWN	136180	148.697	-0.00156221	-0.0101501	0.171778	-0.0090944	0.992744	0.994563	154.113	137.712	156.06	135.733	141.902	163.137	152.22
ENSMUSG00000026640.12	chr1	194618218	194816869	Plxna2	protein_coding	KNOWN	198652	9445.31	-0.198748	-0.200605	0.0755838	-2.62951	0.00855085	0.0218029	10302.9	10099.8	10203.5	8740.48	9049.73	8937.15	8783.5
ENSMUSG00000026641.13	chr1	171411313	171419142	Usf1	protein_coding	KNOWN	7830	2769.41	-0.649309	-0.649828	0.101558	-6.39345	1.62182e-10	2.06798e-09	3437.91	3586.36	3455.67	2546.56	2305.64	1917.18	2136.56
ENSMUSG00000026656.15	chr1	170958617	170976547	Fcgr2b	protein_coding	KNOWN	17931	236.053	0.302695	0.304176	0.148695	2.03567	0.0417833	0.0837226	225.242	185.569	213.599	247.807	251.796	255.456	272.899
ENSMUSG00000026659.13	chr1	170873498	170885540	Dusp12	protein_coding	KNOWN	12043	298.508	-0.257276	-0.263001	0.170166	-1.51191	0.130557	0.21412	336.247	328.164	325.366	328.749	262.466	213.723	294.84
ENSMUSG00000026663.6	chr1	170704674	170867771	Atf6	protein_coding	KNOWN	163098	9085.82	-0.189034	-0.191574	0.0800965	-2.36008	0.0182712	0.0415641	9800.73	9716.97	9824.74	8244.87	8117.23	9148.34	8747.84
ENSMUSG00000026667.14	chr1	170193420	170215397	Uhmk1	protein_coding	KNOWN	21978	21192.2	-0.0909733	-0.093259	0.0903092	-1.00735	0.313765	0.429037	22082.4	21734	22118.7	22292.7	20883.1	18620.4	20614.1
ENSMUSG00000026670.15	chr1	170141938	170174957	Uap1	protein_coding	KNOWN	33020	3038.97	0.393379	0.39357	0.095389	4.12394	3.72438e-05	0.000179242	2527.24	2596.99	2607.07	3267.56	3469.67	3172.96	3631.34
ENSMUSG00000026674.9	chr1	169972307	170110762	Ddr2	protein_coding	KNOWN	138456	907.536	0.0532357	0.0271272	0.167442	0.317935	0.750534	0.820292	1027.06	677.814	988.518	906.55	1075.47	794.189	883.15
ENSMUSG00000026675.12	chr1	169949535	169969241	Hsd17b7	protein_coding	KNOWN	19707	1667.88	0.284142	0.28198	0.0981735	2.89429	0.00380018	0.0108381	1521.73	1426.93	1505.54	1630.05	1857.53	1829.92	1903.43
ENSMUSG00000026678.10	chr1	169655501	169695813	Rgs5	protein_coding	KNOWN	40313	5448.34	0.304189	0.29421	0.100896	3.01488	0.00257078	0.00775668	5004.9	4494.67	4974.46	5972.27	5609.93	5502.41	6579.74
ENSMUSG00000026687.14	chr1	167349991	167368532	Aldh9a1	protein_coding	KNOWN	18542	1864.66	0.0469156	0.0484314	0.0973096	0.482127	0.629716	0.724455	1870.91	1775.6	1840.43	1663.67	1820.19	2104.35	1977.49
ENSMUSG00000026688.5	chr1	167371966	167393841	Mgst3	protein_coding	KNOWN	21876	1370.55	0.215753	0.232663	0.11906	1.81214	0.0699642	0.128619	1216.74	1313.63	1207.5	1372.28	1464.9	1343.04	1675.79
ENSMUSG00000026694.19	chr1	162532127	162548551	Mettl13	protein_coding	KNOWN	16425	698.031	-1.06941	-1.07022	0.133656	-8.00121	1.23201e-15	3.24554e-14	985.031	1046.02	957.472	581.537	546.27	399.624	370.265
ENSMUSG00000026696.15	chr1	162570515	162599084	Vamp4	protein_coding	KNOWN	28570	5730.91	0.282819	0.290585	0.0907361	3.11694	0.0018274	0.00575229	4984.43	5191.04	5072.99	5845.25	5836.12	6439.5	6747.04
ENSMUSG00000026697.10	chr1	162639155	162649693	Myoc	protein_coding	KNOWN	10539	295.825	0.698359	0.743778	0.187062	3.73331	0.000188977	0.000769197	192.911	240.263	207.39	337.466	346.753	455.267	290.726
ENSMUSG00000026698.8	chr1	161969186	161973435	Pigc	protein_coding	KNOWN	4250	629.665	-0.785955	-0.804395	0.143833	-5.46434	4.64625e-08	4.03444e-07	835.228	821.386	842.807	605.197	488.655	424.916	389.464
ENSMUSG00000026701.15	chr1	161240112	161251219	Prdx6	protein_coding	KNOWN	11108	12315.3	0.274674	0.281679	0.0855928	3.20907	0.00133163	0.00433727	10856.9	11141.9	10894.4	12409	13459.4	13335.5	14109.8
ENSMUSG00000026705.16	chr1	161088375	161131511	Klhl20	protein_coding	KNOWN	43137	1173.17	-0.847534	-0.853304	0.106348	-7.96947	1.59359e-15	4.12136e-14	1617.65	1558.78	1548.6	960.096	880.22	797.982	848.866
ENSMUSG00000026708.16	chr1	161070713	161086724	Cenpl	protein_coding	KNOWN	16012	81.2535	-0.39197	-0.429727	0.240028	-1.63302	0.102465	0.176333	88.3725	100.598	96.8648	87.1682	68.2837	49.3206	78.167
ENSMUSG00000026709.10	chr1	161040601	161070658	Dars2	protein_coding	KNOWN	30058	1019.55	-0.476454	-0.480471	0.09931	-4.79765	1.60539e-06	1.03754e-05	1202.73	1237.45	1209.15	840.551	872.751	865.008	909.205
ENSMUSG00000026721.15	chr1	160219174	160793211	Rabgap1l	protein_coding	KNOWN	574038	14231.4	-0.290206	-0.296616	0.0879724	-3.29883	0.000970875	0.00329674	15996.5	15706	16064.2	14042.8	12919.5	12001.4	12889.3
ENSMUSG00000026782.15	chr1	60409619	60481158	Abi2	protein_coding	KNOWN	71540	16495.8	-0.0794189	-0.0910123	0.0816583	-0.972576	0.330764	0.446709	17470.8	16372.1	17436.1	16077.6	16173.6	16600.8	15339.9
ENSMUSG00000027520.15	chr1	63273265	63314576	Zdbf2	protein_coding	KNOWN	41312	15779.1	2.57283	3.57331	0.366223	7.02532	2.13582e-12	3.65414e-11	2161.89	2168.22	2216.71	9084.17	17624.7	45055	32143.1
ENSMUSG00000028033.16	chr1	21398403	21961942	Kcnq5	protein_coding	KNOWN	563540	4743.57	0.00165002	-0.0101817	0.137794	0.0119746	0.990446	0.993637	4906.83	4412.63	4968.67	4629.88	5380.54	3743.31	5163.13
ENSMUSG00000028354.13	chr1	174501825	174822729	Fmn2	protein_coding	KNOWN	320905	5645.29	0.024545	0.0114146	0.0818395	0.299916	0.764241	0.831015	5737.75	5353.17	5768.42	5655.97	5246.11	5780.63	5974.97
ENSMUSG00000030768.12	chr1	183086266	183221522	Disp1	protein_coding	KNOWN	135257	212.512	-0.0186229	-0.0244999	0.163518	-0.113889	0.909326	0.939436	193.989	229.519	220.223	188.034	215.52	226.369	213.931
ENSMUSG00000032487.8	chr1	150100031	150108227	Ptgs2	protein_coding	KNOWN	8197	52845.7	3.15038	5.416	0.402334	7.83026	4.86864e-15	1.17519e-13	2322.47	1824.43	2239.07	18950.4	70049.5	125200	149335
ENSMUSG00000032649.14	chr1	152399830	152510695	Colgalt2	protein_coding	KNOWN	110866	467.384	-0.203941	-0.201417	0.132238	-1.54222	0.123019	0.204123	501.137	516.663	497.157	379.804	434.242	497	445.689
ENSMUSG00000032666.16	chr1	151852403	152090125	1700025G04Rik	protein_coding	KNOWN	237723	8305.04	-0.301068	-0.29449	0.0904975	-3.32681	0.00087847	0.0030132	9076.51	9680.83	9096.6	7729.33	6994.81	7630.79	7926.41
ENSMUSG00000032769.4	chr1	14872648	14918862	Trpa1	protein_coding	KNOWN	46215	93.7057	-0.1523	-0.158165	0.207789	-0.732956	0.463585	0.578006	111.005	91.8077	96.0369	89.6587	75.7522	101.171	90.5091
ENSMUSG00000032883.15	chr1	78657825	78707743	Acsl3	protein_coding	KNOWN	49919	13092.9	0.302243	0.29851	0.0816996	3.69945	0.00021607	0.000868351	11659.8	11310.9	11747.6	13265.8	14047.2	14309.3	15309.8
ENSMUSG00000032908.9	chr1	78310345	78420289	Sgpp2	protein_coding	KNOWN	109945	288.574	-0.353189	-0.366271	0.171937	-2.05418	0.0399586	0.0805223	367.5	295.933	329.506	270.221	307.277	230.163	219.416
ENSMUSG00000032968.4	chr1	75507077	75510366	Inha	protein_coding	KNOWN	3290	1234.57	-0.174694	-0.177565	0.0970575	-1.7999	0.0718767	0.131544	1304.03	1337.07	1325.06	1154.36	1128.82	1239.34	1153.31
ENSMUSG00000032997.16	chr1	75474569	75479307	Chpf	protein_coding	KNOWN	4739	8995.54	1.33549	1.36363	0.107564	12.4158	2.14635e-35	2.40407e-33	4723.62	4753.49	4733.54	10166.3	12443.6	13204	12944.2
ENSMUSG00000033007.15	chr1	75450436	75474343	Asic4	protein_coding	KNOWN	23908	330.755	0.0550729	0.0540646	0.136509	0.403439	0.686626	0.7704	308.226	335.001	327.85	311.315	335.017	359.155	338.724
ENSMUSG00000033021.16	chr1	75435930	75443179	Gmppa	protein_coding	KNOWN	7250	2017.24	-0.0101099	-0.0192517	0.0934117	-0.108229	0.913814	0.942471	1989.46	2032.47	2075.97	1865.4	2013.3	2017.09	2126.96
ENSMUSG00000033061.15	chr1	75272199	75278415	Resp18	protein_coding	KNOWN	6217	883.572	0.276322	0.273357	0.127198	2.17238	0.029827	0.0627283	830.917	728.602	808.863	880.399	1050.93	865.008	1020.28
ENSMUSG00000033124.15	chr1	75180860	75192196	Atg9a	protein_coding	KNOWN	11337	3679.87	-0.191586	-0.204818	0.0796065	-2.40666	0.0160992	0.0373495	3954.13	3920.38	4068.32	3382.13	3420.59	3553.61	3459.92
ENSMUSG00000033159.14	chr1	75134554	75142711	Cnppd1	protein_coding	KNOWN	8158	1598.88	-0.224403	-0.221838	0.117264	-1.91365	0.0556647	0.106475	1790.08	1691.61	1740.26	1748.35	1549.19	1365.8	1306.9
ENSMUSG00000033257.14	chr1	74661745	74703730	Ttll4	protein_coding	KNOWN	41986	2729.19	-0.287331	-0.289512	0.11249	-2.55429	0.0106405	0.0262371	3027.3	3076.54	3033.03	2754.52	2508.36	2606.41	2098.17
ENSMUSG00000033276.18	chr1	74601445	74636894	Stk36	protein_coding	KNOWN	35450	240.582	-0.128794	-0.122231	0.150025	-0.858481	0.390627	0.507567	266.195	251.006	239.678	219.166	235.792	254.191	218.045
ENSMUSG00000033364.13	chr1	74435511	74544284	Usp37	protein_coding	KNOWN	108774	4204.85	1.05285	1.14732	0.158362	6.64839	2.96317e-11	4.32774e-10	2538.02	2436.81	2470.47	3622.46	4137.57	7773.69	6454.95
ENSMUSG00000033488.11	chr1	157458577	157492638	BC026585	protein_coding	KNOWN	34062	432.604	0.501442	0.519301	0.151608	3.30748	0.000941388	0.00320711	320.081	366.254	353.929	417.162	497.191	489.412	584.195
ENSMUSG00000033544.6	chr1	156838562	156861078	Angptl1	protein_coding	KNOWN	22517	64.6397	0.479963	0.531287	0.238936	2.00875	0.0445632	0.0885068	49.5748	50.7872	54.2277	68.4893	68.2837	73.3486	87.7664
ENSMUSG00000033557.17	chr1	156678532	156719086	Fam20b	protein_coding	KNOWN	40555	6001.54	-0.0846898	-0.0949151	0.0992461	-0.853331	0.393476	0.50995	6208.71	6087.63	6388.11	6237.51	6100.72	5076.23	5911.89
ENSMUSG00000033569.17	chr1	25067476	25829707	Adgrb3	protein_coding	KNOWN	762232	6870.82	-0.245888	-0.247376	0.0843175	-2.91622	0.00354301	0.0102056	7595.73	7514.56	7541.8	6043.25	6315.18	6827.75	6257.47
ENSMUSG00000033671.17	chr1	155844964	155973255	Cep350	protein_coding	KNOWN	128292	5606.83	-0.488195	-0.489434	0.107974	-4.52143	6.14241e-06	3.52753e-05	6651.65	6779.12	6698.99	5472.92	5049.79	4651.31	3944
ENSMUSG00000033684.14	chr1	155776029	155812889	Qsox1	protein_coding	KNOWN	36861	1587.65	-0.168539	-0.181982	0.0928332	-1.8155	0.0694465	0.127803	1672.61	1693.56	1742.74	1428.31	1558.79	1504.91	1512.6
ENSMUSG00000033701.13	chr1	155558120	155691330	Acbd6	protein_coding	KNOWN	133211	2274.04	-0.0106043	-0.00420966	0.0861831	-0.123044	0.902073	0.933925	2263.2	2322.54	2247.76	2257.66	2310.98	2190.34	2325.81
ENSMUSG00000033722.9	chr1	155212471	155244444	BC034090	protein_coding	KNOWN	31974	319.156	0.238685	0.248776	0.143015	1.66895	0.0951282	0.165907	279.128	291.05	294.32	308.825	301.942	384.448	374.379
ENSMUSG00000033740.17	chr1	6487231	6860940	St18	protein_coding	KNOWN	373710	6895.08	0.525623	0.545889	0.122947	4.27521	1.90957e-05	9.85174e-05	5468.32	5365.87	5546.13	6907.46	6781.43	10157.5	8038.86
ENSMUSG00000033793.12	chr1	5070018	5162529	Atp6v1h	protein_coding	KNOWN	92512	8560.19	0.16367	0.171316	0.104097	1.57228	0.115887	0.194599	8037.59	8023.41	7893.66	9170.1	8912.09	7970.97	9913.49
ENSMUSG00000033813.15	chr1	4857814	4897909	Tcea1	protein_coding	KNOWN	40096	3064.36	-0.01372	0.000778123	0.0942411	-0.145584	0.88425	0.922157	3045.62	3179.09	2965.55	3172.92	3032.22	2820.13	3235.02
ENSMUSG00000033845.13	chr1	4773206	4785739	Mrpl15	protein_coding	KNOWN	12534	1374.17	-0.416621	-0.402238	0.115323	-3.61264	0.000303093	0.0011689	1599.33	1659.38	1529.55	1399.67	1283.52	988.942	1158.79
ENSMUSG00000033849.3	chr1	143640664	143654614	B3galt2	protein_coding	KNOWN	13951	3522.81	-0.311918	-0.28973	0.142668	-2.18632	0.0287919	0.060963	3911.02	4019.03	3864.66	2292.52	2815.64	3764.81	3992
ENSMUSG00000033952.14	chr1	139454772	139494091	Aspm	protein_coding	KNOWN	39320	75.2054	0.122295	0.136601	0.225281	0.542856	0.587229	0.689901	75.44	69.3441	68.7161	83.4324	69.3506	84.7303	75.4243
ENSMUSG00000033964.12	chr1	139422288	139453005	Zbtb41	protein_coding	KNOWN	30718	3354.09	0.247519	0.26476	0.105033	2.35658	0.0184441	0.0418779	3015.44	3090.21	2917.95	4089.43	3366.17	3623.17	3376.26
ENSMUSG00000034000.15	chr1	94020451	94028334	Neu4	protein_coding	KNOWN	7884	863.54	0.176152	0.146965	0.135585	1.29921	0.193873	0.293933	891.269	668.048	881.718	815.646	958.106	1000.32	829.667
ENSMUSG00000034066.13	chr1	93512079	93621976	Farp2	protein_coding	KNOWN	109898	525.305	-0.205455	-0.189851	0.123702	-1.66088	0.0967373	0.168223	584.121	580.147	531.101	503.085	471.584	546.321	460.774
ENSMUSG00000034088.15	chr1	93405940	93478815	Hdlbp	protein_coding	KNOWN	72876	13297	0.0797868	0.0669012	0.081287	0.981545	0.326324	0.442055	12914.2	12640.2	13283.3	12990.6	13954.4	14075.3	13221.2
ENSMUSG00000034220.7	chr1	92831645	92860779	Gpc1	protein_coding	KNOWN	29135	9739.5	0.388801	0.375063	0.105661	3.6797	0.000233507	0.000930501	8711.16	7580	8689.27	10495.1	10958.5	9785.72	11956.8
ENSMUSG00000034292.13	chr1	91494647	91529307	Traf3ip1	protein_coding	KNOWN	34661	907.015	-0.327328	-0.317866	0.133234	-2.45679	0.0140184	0.0331793	1062.63	1012.81	992.244	992.472	855.68	761.308	671.962
ENSMUSG00000034343.14	chr1	91250304	91290337	Ube2f	protein_coding	KNOWN	40034	2636.12	0.156118	0.167569	0.107705	1.4495	0.147197	0.235748	2485.21	2488.58	2414.58	3011.04	2669.47	2453.39	2930.58
ENSMUSG00000034353.14	chr1	91179822	91225196	Ramp1	protein_coding	KNOWN	45375	3423.39	-0.158536	-0.138943	0.100909	-1.57107	0.116167	0.194998	3521.97	3895.97	3420.9	3338.54	3253.08	2988.32	3544.94
ENSMUSG00000034432.11	chr1	90602981	90613341	Cops8	protein_coding	KNOWN	10361	5080.74	0.063476	0.0673156	0.0811446	0.782259	0.434063	0.549916	4914.38	4997.66	4925.2	5374.54	5411.48	4847.33	5094.57
ENSMUSG00000035131.14	chr1	146494760	146902472	Brinp3	protein_coding	KNOWN	407713	717.719	0.272268	0.316356	0.128832	2.11337	0.0345695	0.071211	587.354	751.065	550.143	759.609	758.589	839.715	777.556
ENSMUSG00000036086.16	chr1	127954184	128103047	Zranb3	protein_coding	KNOWN	148864	533.73	0.142558	0.155399	0.122683	1.16201	0.245233	0.353611	459.106	559.636	484.738	545.424	580.412	534.939	571.853
ENSMUSG00000036104.11	chr1	127868773	127943868	Rab3gap1	protein_coding	KNOWN	75096	6930.73	-0.0306894	-0.0290207	0.0869656	-0.352892	0.72417	0.800696	7084.89	6922.69	7023.94	7374.43	7203.93	6425.59	6479.63
ENSMUSG00000036155.13	chr1	127205015	127488336	Mgat5	protein_coding	KNOWN	283322	6585.42	0.0234003	0.0182704	0.0807782	0.289686	0.772057	0.837349	6768.04	6247.81	6597.57	6635.99	6681.13	6504	6663.39
ENSMUSG00000036206.12	chr1	89070415	89155068	Sh3bp4	protein_coding	KNOWN	84654	1608.8	-0.186454	-0.20514	0.101711	-1.83316	0.0667782	0.123667	1877.38	1555.85	1788.69	1418.35	1496.91	1651.61	1472.83
ENSMUSG00000036707.16	chr1	85793441	85851576	Cab39	protein_coding	KNOWN	58136	11146.5	0.0446292	0.0489728	0.0861906	0.517796	0.6046	0.704041	10673.7	11245.5	10873.3	12330.6	11392.7	10286.5	11223.1
ENSMUSG00000036766.12	chr1	84369839	84696221	Dner	protein_coding	KNOWN	326383	6658.31	0.145309	0.139324	0.0959711	1.51409	0.130004	0.213437	6332.65	6129.63	6418.74	6076.87	7167.66	7169.2	7313.41
ENSMUSG00000036815.16	chr1	123321471	124045559	Dpp10	protein_coding	KNOWN	724089	1792.26	0.0307053	0.0500467	0.0982169	0.312628	0.754564	0.823252	1614.42	1989.49	1666.57	1809.36	1969.56	1712.31	1784.13
ENSMUSG00000036907.9	chr1	120340582	120343174	C1ql2	protein_coding	KNOWN	2593	5887.24	1.15476	1.19629	0.125919	9.17063	4.70273e-20	1.94209e-18	3324.75	3454.51	3382.82	6078.12	7417.32	9248.25	8304.9
ENSMUSG00000036975.5	chr1	119907890	119913208	Tmem177	protein_coding	KNOWN	5319	351.197	-0.816919	-0.842836	0.15332	-5.32821	9.91836e-08	8.19198e-07	477.427	454.155	478.529	302.598	306.21	220.046	219.416
ENSMUSG00000037035.5	chr1	119415465	119422248	Inhbb	protein_coding	KNOWN	6784	274.873	0.190029	0.211464	0.148942	1.27585	0.202008	0.303372	248.952	268.586	238.85	341.201	278.47	282.013	266.042
ENSMUSG00000037138.16	chr1	38177326	38664955	Aff3	protein_coding	KNOWN	487630	3376.96	-0.0717649	-0.101925	0.100003	-0.717628	0.472987	0.586987	3603.88	3204.48	3733.44	3323.6	3356.57	3003.5	3413.29
ENSMUSG00000037216.5	chr1	37871738	37876228	Lipt1	protein_coding	KNOWN	4491	207.449	0.101562	0.105206	0.169317	0.599836	0.548615	0.656122	211.232	181.662	203.665	188.034	196.316	201.076	270.156
ENSMUSG00000037351.9	chr1	36698114	36714422	Actr1b	protein_coding	KNOWN	16309	19108.6	0.324434	0.330019	0.0841347	3.85613	0.000115196	0.000495028	16899.6	16454.1	16630.5	19170.8	20937.5	21197.8	22469.6
ENSMUSG00000037375.16	chr1	192496711	192771223	Hhat	protein_coding	KNOWN	274513	58.5104	0.359659	0.397865	0.268815	1.33794	0.180915	0.27808	53.8857	40.0438	54.6417	51.0557	82.1538	61.9669	65.8248
ENSMUSG00000037395.15	chr1	192098546	192138062	Rcor3	protein_coding	KNOWN	39517	2134.5	-0.608685	-0.600754	0.119307	-5.10183	3.36383e-07	2.50342e-06	2599.45	2765.95	2585.55	2201.62	1800.98	1513.76	1474.2
ENSMUSG00000037408.10	chr1	36471620	36508764	Cnnm4	protein_coding	KNOWN	37145	2249.66	0.750032	0.82017	0.168784	4.44374	8.84099e-06	4.90889e-05	1587.47	1556.82	1550.67	1681.1	2484.89	3626.96	3259.7
ENSMUSG00000037432.15	chr1	36372291	36422110	Fer1l5	protein_coding	KNOWN	49820	1250.03	-0.0781436	-0.110857	0.106304	-0.735093	0.462283	0.576706	1367.62	1155.41	1392.54	1222.85	1222.71	1233.02	1156.05
ENSMUSG00000037434.7	chr1	191906767	191913247	Slc30a1	protein_coding	KNOWN	6481	4652.77	0.976749	0.97455	0.100435	9.72519	2.3547e-22	1.16382e-20	3174.95	2716.14	3105.88	6211.36	5780.64	5549.2	6031.2
ENSMUSG00000037447.16	chr1	36307733	36324029	Arid5a	protein_coding	KNOWN	16297	5203.23	3.42667	3.58002	0.150656	22.745	1.6085e-114	1.92636e-111	710.213	727.625	711.584	5792.95	7923.04	10425.6	10131.5
ENSMUSG00000037461.10	chr1	191575636	191623688	Ints7	protein_coding	KNOWN	48053	1254.6	0.11541	0.112784	0.116526	0.990422	0.321968	0.437333	1197.34	1169.08	1230.27	1465.67	1362.47	1267.16	1090.22
ENSMUSG00000037470.14	chr1	36140027	36244720	Uggt1	protein_coding	KNOWN	104694	4512.57	-0.207762	-0.22486	0.107813	-1.92706	0.0539725	0.103869	5024.3	4646.06	5084.16	4283.7	4467.25	4422.42	3660.13
ENSMUSG00000037474.13	chr1	191537356	191575544	Dtl	protein_coding	KNOWN	38189	118.471	0.298572	0.342755	0.201699	1.48028	0.138797	0.224606	112.082	102.551	93.5532	98.3756	112.028	169.461	141.249
ENSMUSG00000037499.9	chr1	191306789	191318194	Nenf	protein_coding	KNOWN	11406	1674.3	0.292218	0.312456	0.136818	2.13581	0.032695	0.0678162	1457.07	1521.66	1434.34	1635.03	1754.04	1641.49	2276.44
ENSMUSG00000037503.12	chr1	34813219	34843065	Fam168b	protein_coding	KNOWN	29847	25290	0.139675	0.143641	0.079493	1.75707	0.0789061	0.141931	23830.4	23984.3	23772.9	24715.9	26525	26840.5	27361.2
ENSMUSG00000037509.19	chr1	34678188	34813309	Arhgef4	protein_coding	KNOWN	135122	11205.8	-0.0381354	-0.0412281	0.0944785	-0.403641	0.686477	0.770289	11351.6	11344.1	11471.9	10627.1	10826.2	10488.9	12331.2
ENSMUSG00000037568.12	chr1	190947646	190979296	Vash2	protein_coding	KNOWN	31651	134.682	0.186148	0.205394	0.193928	0.959884	0.337114	0.453358	112.082	143.572	115.907	125.771	157.906	135.316	152.22
ENSMUSG00000037624.15	chr1	189207930	189402273	Kcnk2	protein_coding	KNOWN	194344	2499.66	-0.0419626	-0.0487227	0.0867935	-0.483476	0.628758	0.723887	2611.3	2450.48	2582.23	2372.22	2378.19	2449.59	2653.56
ENSMUSG00000037860.15	chr1	173350879	173466040	Aim2	protein_coding	KNOWN	115162	163.021	0.129854	0.129554	0.17571	0.739021	0.459894	0.574462	155.191	150.408	158.544	155.658	185.646	182.107	153.591
ENSMUSG00000037872.5	chr1	173331886	173333750	Ackr1	protein_coding	KNOWN	1865	1271.24	0.0252464	0.0176311	0.105113	0.240184	0.810187	0.866273	1307.27	1197.41	1282.42	1185.49	1331.53	1365.8	1228.73
ENSMUSG00000037995.15	chr1	172481788	172498878	Igsf9	protein_coding	KNOWN	17091	295.202	-0.281891	-0.316714	0.151767	-1.85739	0.0632555	0.118534	337.324	301.793	358.897	247.807	278.47	303.512	238.615
ENSMUSG00000038026.12	chr1	172320501	172329318	Kcnj9	protein_coding	KNOWN	8818	5403.08	-0.390977	-0.366129	0.0926937	-4.21795	2.46532e-05	0.000123815	5746.37	7113.14	5730.76	5076.93	4847.08	4827.1	4480.2
ENSMUSG00000038034.15	chr1	172261641	172319841	Igsf8	protein_coding	KNOWN	58201	8111.94	-0.166273	-0.166686	0.0971113	-1.71219	0.0868624	0.153922	8715.47	8541.05	8697.55	6758.03	7448.26	8746.19	7877.04
ENSMUSG00000038079.14	chr1	59100590	59120408	Tmem237	protein_coding	KNOWN	19819	1304.6	-0.0906989	-0.0907061	0.10112	-0.896943	0.369749	0.486901	1294.33	1413.25	1347.41	1368.54	1216.3	1211.52	1280.84
ENSMUSG00000038147.13	chr1	171839697	171890718	Cd84	protein_coding	KNOWN	51022	135.185	0.294822	0.305713	0.182248	1.6177	0.105728	0.18061	100.227	130.875	126.255	183.053	156.839	120.14	128.907
ENSMUSG00000038174.14	chr1	58522806	58586323	Fam126b	protein_coding	KNOWN	63518	13847.4	0.311496	0.316959	0.115819	2.68951	0.00715575	0.0186895	11949.7	12292.5	12185.5	16814.8	12883.2	14706.4	16099.7
ENSMUSG00000038235.4	chr1	171437535	171464603	F11r	protein_coding	KNOWN	27069	391.086	0.341387	0.36889	0.130994	2.60613	0.00915721	0.023103	359.956	332.07	313.776	410.936	450.246	408.476	462.145
ENSMUSG00000038242.12	chr1	58210397	58268597	Aox4	protein_coding	KNOWN	58201	144.077	0.00373149	0.012898	0.209543	0.0178077	0.985792	0.990245	137.947	159.198	132.879	112.073	167.508	130.257	168.676
ENSMUSG00000038305.14	chr1	57774162	57948394	Spats2l	protein_coding	KNOWN	174233	664.139	-0.0966109	-0.0528487	0.109598	-0.8815	0.378047	0.494898	678.96	760.832	594.435	650.026	688.172	619.669	656.877
ENSMUSG00000038323.3	chr1	57377620	57385423	1700066M21Rik	protein_coding	KNOWN	7804	1721.49	-0.197976	-0.196507	0.131854	-1.50148	0.133232	0.217545	1884.92	1819.55	1865.27	2016.08	1591.86	1351.89	1520.83
ENSMUSG00000038331.15	chr1	56793981	56978650	Satb2	protein_coding	KNOWN	184670	85.3358	5.30342e-05	-0.0082164	0.333635	0.000158959	0.999873	0.999937	59.2743	147.478	50.0882	122.036	75.7522	112.552	30.1697
ENSMUSG00000038349.10	chr1	55405921	55754285	Plcl1	protein_coding	KNOWN	348365	3626.8	-0.119934	-0.145743	0.106557	-1.12554	0.26036	0.370412	3943.36	3514.09	4055.08	3362.2	3145.32	4070.85	3296.73
ENSMUSG00000038370.6	chr1	171173262	171196268	Pcp4l1	protein_coding	KNOWN	23007	1985.69	0.258418	0.268743	0.0995002	2.59716	0.00939988	0.0236043	1776.07	1803.92	1753.09	2039.74	2176.54	2024.67	2325.81
ENSMUSG00000038463.8	chr1	170644532	170682789	Olfml2b	protein_coding	KNOWN	38258	3388.37	-0.677338	-0.719367	0.125122	-5.41344	6.18247e-08	5.27135e-07	4708.53	3755.33	4641.65	2473.09	3019.42	2649.4	2471.17
ENSMUSG00000038473.14	chr1	170302668	170589861	Nos1ap	protein_coding	KNOWN	287194	3692.32	-0.0231093	-0.0241333	0.0995046	-0.232244	0.816349	0.871259	3885.16	3569.76	3728.05	3788.08	3405.65	4000.03	3469.52
ENSMUSG00000038496.16	chr1	83012523	83038448	Slc19a3	protein_coding	KNOWN	25926	237.634	0.274992	0.285268	0.149608	1.83809	0.0660494	0.12258	203.688	219.753	210.288	244.071	272.068	268.102	245.472
ENSMUSG00000038530.11	chr1	169741477	169747642	Rgs4	protein_coding	KNOWN	6166	50723.5	2.93244	3.41821	0.282939	10.3642	3.60822e-25	2.24706e-23	7729.36	7830.03	7718.14	44280.2	77778.3	96649.5	113079
ENSMUSG00000038576.15	chr1	182763860	182896591	Susd4	protein_coding	KNOWN	132732	9898.03	-0.0771979	-0.0753303	0.0834551	-0.925023	0.354954	0.472089	10212.4	10221.9	10148.9	8994.52	9903.27	9991.85	9813.38
ENSMUSG00000038608.15	chr1	80501073	80758527	Dock10	protein_coding	KNOWN	257455	16320.2	-0.10459	-0.107063	0.0968289	-1.08016	0.280073	0.392657	17377.1	16497.1	17172.8	14587	14708.7	18375.1	15523.7
ENSMUSG00000038633.5	chr1	182275772	182282804	Degs1	protein_coding	KNOWN	7033	3792.46	0.175242	0.180605	0.0925452	1.89358	0.0582803	0.110647	3532.75	3536.55	3502.45	4014.72	4109.83	3657.31	4193.59
ENSMUSG00000038702.6	chr1	111858702	111864918	Dsel	protein_coding	KNOWN	6217	1381.32	-0.244361	-0.250742	0.137447	-1.77786	0.0754275	0.136815	1562.69	1442.55	1554.39	1603.9	1240.84	1160.93	1103.94
ENSMUSG00000038733.13	chr1	181173228	181211552	Wdr26	protein_coding	KNOWN	38325	15241.8	0.494851	0.503775	0.0822544	6.0161	1.78669e-09	1.92771e-08	12256.8	12441.9	12212	17615.5	16916.2	18415.6	16834.7
ENSMUSG00000038776.13	chr1	180976210	181020904	Ephx1	protein_coding	KNOWN	44695	1078.77	0.126747	0.121178	0.126227	1.00411	0.315324	0.430714	1086.34	948.354	1047.3	978.775	1230.17	1050.91	1209.53
ENSMUSG00000038793.8	chr1	180935022	180938400	Lefty1	protein_coding	KNOWN	3379	63.2401	0.244322	0.32624	0.344541	0.709123	0.478248	0.591746	58.1966	50.7872	56.7115	125.771	53.3467	26.5573	71.3102
ENSMUSG00000038806.7	chr1	180851127	180868113	Sde2	protein_coding	KNOWN	16987	3636.83	1.21824	1.27691	0.130332	9.3472	8.99955e-21	3.92476e-19	1995.93	2076.42	1944.75	3750.72	4492.85	5898.24	5298.9
ENSMUSG00000038855.10	chr1	180330485	180424802	Itpkb	protein_coding	KNOWN	94318	2261.54	-0.13194	-0.12677	0.0920931	-1.43268	0.151948	0.241614	2383.9	2382.12	2361.18	2029.77	2017.57	2334.51	2321.7
ENSMUSG00000038866.15	chr1	105990406	106034074	Zcchc2	protein_coding	KNOWN	43669	2470.9	-0.118345	-0.100465	0.0990818	-1.19442	0.232315	0.339012	2554.18	2676.1	2478.75	2717.16	2483.82	2299.1	2087.2
ENSMUSG00000038936.13	chr1	179668210	179687189	Sccpdh	protein_coding	KNOWN	18980	2524.1	0.209223	0.215327	0.108715	1.92452	0.05429	0.104364	2287.99	2346.96	2299.5	2702.21	2663.06	2387.62	2981.32
ENSMUSG00000038949.8	chr1	179546370	179627478	Cnst	protein_coding	KNOWN	81109	3071.77	-0.415431	-0.414982	0.0950434	-4.37096	1.23701e-05	6.6571e-05	3529.51	3652.78	3568.68	2463.12	2532.9	2911.18	2844.18
ENSMUSG00000039210.16	chr1	187215508	187351704	Gpatch2	protein_coding	KNOWN	136197	1551.65	-0.109423	-0.103351	0.101404	-1.07908	0.280553	0.393153	1693.09	1569.52	1583.78	1478.12	1595.06	1539.06	1402.89
ENSMUSG00000039239.14	chr1	186622792	186705989	Tgfb2	protein_coding	KNOWN	83198	6960.89	0.428663	0.435093	0.104519	4.1013	4.10831e-05	0.000195484	5959.76	5421.54	6004.38	6206.38	7053.49	9188.81	8891.84
ENSMUSG00000039246.8	chr1	186087731	186117310	Lyplal1	protein_coding	KNOWN	29580	638.732	0.119433	0.103012	0.112595	1.06073	0.288812	0.4023	606.753	590.89	640.798	622.63	697.774	651.285	660.991
ENSMUSG00000039318.12	chr1	185204117	185286759	Rab3gap2	protein_coding	KNOWN	82643	7308.72	0.285349	0.293552	0.105114	2.71466	0.00663442	0.0175427	6372.52	6545.69	6503.6	6824.03	7744.87	9006.71	8163.65
ENSMUSG00000039323.18	chr1	72824503	72852474	Igfbp2	protein_coding	KNOWN	27972	1425.35	0.456926	0.429742	0.106415	4.29382	1.75625e-05	9.14485e-05	1227.52	1054.81	1286.15	1603.9	1421.15	1583.32	1800.58
ENSMUSG00000039349.5	chr1	184871926	184883218	C130074G19Rik	protein_coding	KNOWN	11293	674.244	0.360512	0.377792	0.122705	2.93804	0.0033029	0.00961355	578.732	583.077	565.459	871.682	724.448	695.547	700.76
ENSMUSG00000039354.16	chr1	72583251	72633134	Smarcal1	protein_coding	KNOWN	49884	2993.2	-0.397389	-0.392456	0.0887791	-4.47616	7.59991e-06	4.27777e-05	3440.06	3550.22	3403.93	2568.97	2526.5	2820.13	2642.59
ENSMUSG00000039372.5	chr1	72427112	72536930	March4	protein_coding	KNOWN	109819	1361.96	-0.757346	-0.755933	0.100267	-7.5533	4.24352e-14	8.98876e-13	1841.81	1761.93	1723.7	1095.83	975.177	1104.02	1031.26
ENSMUSG00000039384.8	chr1	184013302	184075636	Dusp10	protein_coding	KNOWN	62335	199.27	1.07981	1.17185	0.201743	5.35242	8.67856e-08	7.23709e-07	105.616	128.921	113.837	195.506	237.926	340.186	272.899
ENSMUSG00000039395.8	chr1	72159442	72212307	Mreg	protein_coding	KNOWN	52866	263.901	0.336324	0.356063	0.177506	1.89472	0.0581293	0.110422	218.776	223.659	240.092	240.335	252.863	280.748	390.835
ENSMUSG00000039630.10	chr1	178321108	178337797	Hnrnpu	protein_coding	KNOWN	16690	70136	1.06057	1.11588	0.138322	7.66737	1.75558e-14	3.93276e-13	41885.4	42298.9	42034.4	66590.3	81883.9	117349	98910
ENSMUSG00000039997.16	chr1	173920407	173942672	Ifi203	protein_coding	KNOWN	22266	280.174	-0.538406	-0.554171	0.199381	-2.70039	0.00692588	0.0181653	359.956	330.117	337.785	329.994	235.792	161.873	205.703
ENSMUSG00000040113.14	chr1	163702256	163725232	Mettl11b	protein_coding	KNOWN	22977	58.9757	0.168114	0.176051	0.243385	0.690733	0.489734	0.602692	52.808	49.8106	62.0928	61.0178	67.2168	58.173	61.7108
ENSMUSG00000040124.5	chr1	163384908	163403669	Gorab	protein_coding	KNOWN	18762	685.916	-0.514139	-0.518315	0.13699	-3.75312	0.000174644	0.000715912	853.549	812.596	820.453	706.063	592.148	531.145	485.458
ENSMUSG00000040170.13	chr1	162874317	162898726	Fmo2	protein_coding	KNOWN	24410	173.416	-0.0190589	-0.0236444	0.256016	-0.0744442	0.940657	0.960901	160.579	186.545	177.999	124.526	243.261	112.552	208.445
ENSMUSG00000040181.14	chr1	162829561	162866610	Fmo1	protein_coding	KNOWN	37050	472.711	0.0234714	0.0246563	0.140662	0.166864	0.867477	0.91003	478.505	455.132	470.664	464.482	564.408	412.27	463.516
ENSMUSG00000040225.15	chr1	162670725	162740556	Prrc2c	protein_coding	KNOWN	69832	23280.2	0.477333	0.477514	0.114061	4.18489	2.85299e-05	0.000140921	19387	18148.6	19514.5	24753.3	25612.8	31576.6	23968.5
ENSMUSG00000040265.16	chr1	161982453	162478034	Dnm3	protein_coding	KNOWN	495582	6960.3	-0.0752813	-0.0787764	0.0931954	-0.80778	0.419217	0.535774	7223.92	7082.87	7228.02	6238.75	6871.05	7452.47	6624.99
ENSMUSG00000040297.12	chr1	161816114	161876682	Suco	protein_coding	KNOWN	60569	6465.23	1.59241	1.704	0.166465	9.56604	1.11077e-21	5.11643e-20	2790.2	2854.83	2823.57	5878.87	7718.19	12789.2	10401.7
ENSMUSG00000040423.10	chr1	160906418	160974978	Rc3h1	protein_coding	KNOWN	68561	4629.07	-0.223568	-0.214311	0.0985301	-2.26903	0.0232665	0.0510551	5009.21	5151.98	4915.27	4944.93	4291.2	4193.52	3897.38
ENSMUSG00000040596.15	chr1	166384622	166409863	Pogk	protein_coding	KNOWN	25242	4078.24	0.303023	0.310221	0.0883325	3.43048	0.000602524	0.00215996	3556.46	3642.03	3561.23	4642.33	4181.31	4569.11	4395.18
ENSMUSG00000040612.13	chr1	166254139	166316823	Ildr2	protein_coding	KNOWN	62685	12898.4	0.0426315	0.043115	0.0844891	0.50458	0.613854	0.711993	12640.5	12717.3	12678.1	13257	13072.1	13699.8	12224.2
ENSMUSG00000040648.14	chr1	97706048	97770411	Ppip5k2	protein_coding	KNOWN	64364	2141.29	-0.46992	-0.471534	0.120371	-3.90392	9.46486e-05	0.000416598	2500.3	2641.91	2499.03	2140.6	1775.38	1893.15	1538.66
ENSMUSG00000040693.7	chr1	96816270	96872171	Slco4c1	protein_coding	KNOWN	55902	189.987	-1.2743	-1.35977	0.191137	-6.66696	2.61152e-11	3.84661e-10	301.76	261.75	311.706	140.714	124.831	98.6413	90.5091
ENSMUSG00000040710.10	chr1	95587682	95667571	St8sia4	protein_coding	KNOWN	79890	1391.9	-0.550523	-0.561741	0.130186	-4.22873	2.35016e-05	0.000118567	1711.41	1690.63	1717.07	1113.26	984.779	1429.03	1097.08
ENSMUSG00000040713.12	chr1	165763746	165775308	Creg1	protein_coding	KNOWN	11563	1725.33	0.228303	0.241032	0.101735	2.2441	0.0248259	0.0539146	1460.3	1704.3	1524.17	1935.13	1822.32	1709.78	1921.26
ENSMUSG00000040723.14	chr1	165646516	165709757	Rcsd1	protein_coding	KNOWN	63242	252.296	0.19349	0.206669	0.180674	1.07093	0.284199	0.396869	254.34	204.126	237.195	323.768	289.139	217.517	239.986
ENSMUSG00000040782.12	chr1	159232320	159347640	Rfwd2	protein_coding	KNOWN	115321	5068.47	0.722217	0.73672	0.0829563	8.706	3.14777e-18	1.09883e-16	3636.21	3756.3	3619.6	6274.87	6023.9	5861.57	6306.84
ENSMUSG00000040836.15	chr1	165295789	165326745	Gpr161	protein_coding	KNOWN	30957	1425.23	-0.159593	-0.101343	0.127222	-1.25444	0.209681	0.312454	1407.49	1710.16	1330.44	1696.04	1739.1	951.003	1142.33
ENSMUSG00000040843.10	chr1	165212286	165236996	Tiprl	protein_coding	KNOWN	24711	2765.68	0.0211528	0.0300311	0.0977182	0.216468	0.828623	0.880912	2685.66	2830.41	2682.41	2759.5	2739.88	2621.58	3040.28
ENSMUSG00000040848.11	chr1	165174337	165194438	Sft2d2	protein_coding	KNOWN	20102	2997.26	0.330288	0.350974	0.0992062	3.32931	0.000870614	0.00299284	2583.28	2653.63	2532.15	2951.27	3090.9	3508.09	3661.51
ENSMUSG00000040865.15	chr1	62958418	63114667	Ino80d	protein_coding	KNOWN	156250	4400.78	-0.292377	-0.295948	0.1391	-2.10192	0.0355602	0.0730333	4917.61	4814.05	5035.73	5094.36	4052.21	3829.3	3062.23
ENSMUSG00000040918.12	chr1	164249046	164265385	Slc19a2	protein_coding	KNOWN	16340	1068.45	0.204062	0.204769	0.111292	1.83357	0.0667175	0.123584	958.088	978.631	1011.7	1295.07	1247.24	1007.91	980.516
ENSMUSG00000041040.12	chr1	59913006	59985346	Fam117b	protein_coding	KNOWN	72341	4572.3	-0.42991	-0.423609	0.0842179	-5.10473	3.31268e-07	2.47007e-06	5353.01	5455.72	5241.88	4289.92	3949.79	3828.04	3887.78
ENSMUSG00000041075.8	chr1	59482424	59486955	Fzd7	protein_coding	KNOWN	4532	631.387	-0.200557	-0.181048	0.178263	-1.12506	0.260563	0.370644	698.359	639.724	692.956	808.174	704.176	405.947	470.373
ENSMUSG00000041144.10	chr1	46066315	46373546	Dnah7b	protein_coding	KNOWN	307232	267.67	0.243073	0.262137	0.15497	1.56852	0.116761	0.195784	237.097	254.913	228.916	254.033	322.214	302.247	274.27
ENSMUSG00000041303.7	chr1	54396004	54438971	Gtf3c3	protein_coding	KNOWN	42968	2318.44	-0.394715	-0.384131	0.103964	-3.79664	0.000146668	0.00061318	2701.83	2714.19	2611.62	2369.73	2148.8	1826.13	1856.81
ENSMUSG00000041396.13	chr1	163994889	163997243	Mettl18	protein_coding	KNOWN	2355	144.263	-1.42098	-1.51721	0.208062	-6.82962	8.51387e-12	1.33621e-10	226.32	232.449	230.157	98.3756	93.8901	51.8499	76.7956
ENSMUSG00000041406.14	chr1	163945993	163994796	BC055324	protein_coding	KNOWN	48804	76.7909	-0.0021347	-9.53599e-05	0.248307	-0.00859702	0.993141	0.994782	61.4297	92.7844	76.1672	89.6587	60.8152	77.1425	79.5383
ENSMUSG00000041426.12	chr1	52844929	52920986	Hibch	protein_coding	KNOWN	76058	1114.95	0.0175889	0.0222783	0.10261	0.171415	0.863897	0.90713	1094.96	1122.2	1098.22	1130.7	1035.99	1126.79	1195.82
ENSMUSG00000041439.15	chr1	52656286	52727462	Mfsd6	protein_coding	KNOWN	71177	5573.55	-0.46929	-0.473417	0.0868346	-5.40441	6.50205e-08	5.5287e-07	6760.5	6504.67	6636.9	4895.12	5083.94	4641.2	4492.54
ENSMUSG00000041483.14	chr1	136624901	136630053	Zfp281	protein_coding	KNOWN	5153	6033.41	0.819925	0.851469	0.128978	6.3571	2.05603e-10	2.5794e-09	4089.92	4240.74	4069.98	6135.4	7535.75	9010.5	7151.59
ENSMUSG00000041559.7	chr1	134037254	134048277	Fmod	protein_coding	KNOWN	11024	464.347	-0.0759802	-0.111228	0.364825	-0.208265	0.835022	0.88561	613.219	244.169	597.333	523.009	580.412	360.42	331.867
ENSMUSG00000041570.14	chr1	136268123	136346104	Camsap2	protein_coding	KNOWN	77982	17941.6	0.396215	0.400659	0.0744185	5.32414	1.01432e-07	8.35553e-07	15224.9	15130.7	15146.1	19661.4	19482.2	20131.7	20814.4
ENSMUSG00000041577.5	chr1	133910304	133921414	Prelp	protein_coding	KNOWN	11111	1304.08	0.197427	0.201821	0.110267	1.79044	0.0733837	0.133783	1244.76	1152.48	1205.84	1276.39	1286.72	1622.52	1339.81
ENSMUSG00000041605.16	chr1	136213531	136234264	5730559C18Rik	protein_coding	KNOWN	20734	174.36	0.205093	0.210199	0.163725	1.25267	0.210325	0.313235	177.823	141.618	160.613	176.827	177.111	197.283	189.246
ENSMUSG00000041642.18	chr1	136131389	136177998	Kif21b	protein_coding	KNOWN	46610	4681.22	0.328972	0.350817	0.0854785	3.8486	0.000118797	0.000509235	3898.09	4350.12	3886.6	5180.28	5129.81	5279.84	5043.83
ENSMUSG00000041670.15	chr1	22286251	22805724	Rims1	protein_coding	KNOWN	519474	14784.4	0.0680098	0.0664664	0.0847797	0.802195	0.42244	0.538876	14382.1	14332.7	14474.7	14702.8	14760	14550.8	16287.5
ENSMUSG00000041684.11	chr1	44118957	44144770	Bivm	protein_coding	KNOWN	25814	1313.58	-0.947608	-0.966346	0.110071	-8.60902	7.36871e-18	2.51586e-16	1841.81	1787.32	1836.29	1051	917.562	842.245	918.805
ENSMUSG00000041757.15	chr1	133181321	133303435	Plekha6	protein_coding	KNOWN	122115	5381.27	-0.160128	-0.161671	0.114652	-1.39664	0.162521	0.254966	5626.74	5819.05	5739.03	4651.05	5007.12	6039.88	4786.01
ENSMUSG00000041763.14	chr1	43933647	44003000	Tpp2	protein_coding	KNOWN	69354	6758.26	0.628084	0.640487	0.0809975	7.75436	8.87919e-15	2.06021e-13	5230.15	5059.19	5077.95	7371.94	7776.87	8309.89	8481.8
ENSMUSG00000041779.5	chr1	20996299	21079229	Tram2	protein_coding	KNOWN	82931	132.469	0.178885	0.179582	0.189286	0.94505	0.344633	0.460843	120.704	119.155	129.567	139.469	146.17	154.285	117.936
ENSMUSG00000041782.14	chr1	135818598	135833342	Lad1	protein_coding	KNOWN	14745	84.2739	0.328207	0.359677	0.213449	1.53764	0.124137	0.205715	70.0514	80.0876	67.4742	89.6587	96.024	96.112	90.5091
ENSMUSG00000041801.5	chr1	135766119	135769136	Phlda3	protein_coding	KNOWN	3018	564.382	0.222841	0.242357	0.141686	1.57278	0.11577	0.194479	551.79	492.246	488.878	547.915	602.817	537.468	729.558
ENSMUSG00000041809.5	chr1	20951626	20990841	Efhc1	protein_coding	KNOWN	39216	57.6486	0.319297	0.338766	0.254384	1.25518	0.209414	0.312147	51.7303	35.1604	63.3347	68.4893	53.3467	67.0255	64.4535
ENSMUSG00000041859.10	chr1	20802968	20820312	Mcm3	protein_coding	KNOWN	17345	227.933	0.0208869	0.0134486	0.152762	0.136729	0.891245	0.926393	228.475	217.799	233.883	217.921	224.056	256.72	216.673
ENSMUSG00000041879.13	chr1	135382312	135430499	Ipo9	protein_coding	KNOWN	48188	12596	0.0852189	0.0945581	0.0778938	1.09404	0.273938	0.385758	11999.3	12448.7	11931.8	12746.5	12841.6	12770.2	13433.7
ENSMUSG00000041889.7	chr1	135371057	135375237	Shisa4	protein_coding	KNOWN	4181	3842.64	0.114887	0.134367	0.0968505	1.18624	0.235529	0.342738	3618.96	3773.88	3526.05	3588.84	3861.23	4179.61	4349.92
ENSMUSG00000041907.9	chr1	42952872	43035456	Gpr45	protein_coding	KNOWN	82585	851.4	-0.406579	-0.421491	0.111329	-3.65205	0.000260159	0.00102283	981.797	986.445	1018.32	764.59	825.806	660.138	722.702
ENSMUSG00000041926.15	chr1	135262712	135284084	Rnpep	protein_coding	KNOWN	21373	2280.02	0.202504	0.250259	0.157328	1.28715	0.198042	0.298887	2041.19	2070.56	2060.24	1819.33	1806.32	3417.03	2745.44
ENSMUSG00000041945.12	chr1	40772038	40790687	Mfsd9	protein_coding	KNOWN	18650	83.6832	-0.878988	-0.963861	0.240151	-3.66015	0.000252071	0.000994046	112.082	116.225	119.632	84.6777	59.7482	46.7914	46.6259
ENSMUSG00000042046.15	chr1	132417555	132466958	Dstyk	protein_coding	KNOWN	49404	4567.27	-0.631402	-0.636724	0.108022	-5.84515	5.06121e-09	5.09689e-08	5625.67	5806.35	5779.19	4445.58	3794.01	3193.19	3326.9
ENSMUSG00000042066.15	chr1	132356315	132391281	Tmcc2	protein_coding	KNOWN	34967	16717.4	-0.0473181	-0.0509993	0.101299	-0.467115	0.640418	0.732619	17161.5	16735.4	17270.9	16009.1	14905.1	15900.2	19039.8
ENSMUSG00000042111.9	chr1	34436670	34439672	Ccdc115	protein_coding	KNOWN	3003	836.929	-0.638025	-0.638841	0.153221	-4.16408	3.12604e-05	0.000153241	1007.66	1130.02	1018.32	916.512	674.302	493.206	618.479
ENSMUSG00000042115.4	chr1	132298626	132307357	Klhdc8a	protein_coding	KNOWN	8732	223.996	-0.29461	-0.326054	0.1637	-1.7997	0.0719087	0.131557	232.786	255.89	271.139	190.525	241.127	202.341	174.162
ENSMUSG00000042182.16	chr1	33852052	33907816	Bend6	protein_coding	KNOWN	55765	6283.87	0.189185	0.20579	0.117545	1.60947	0.107513	0.183196	5621.36	6110.1	5601.6	6322.19	6461.35	6053.79	7816.7
ENSMUSG00000042197.13	chr1	33761545	33814595	Zfp451	protein_coding	KNOWN	53051	5290.96	-0.538006	-0.53586	0.146036	-3.68406	0.000229551	0.000916377	6380.07	6449	6464.28	6004.65	4556.87	3898.86	3283.01
ENSMUSG00000042207.17	chr1	134560171	134635285	Kdm5b	protein_coding	KNOWN	75115	5371.82	-0.307569	-0.317444	0.104524	-2.94258	0.00325493	0.00949522	6111.72	5816.12	6237.85	5401.94	5330.4	4443.92	4260.79
ENSMUSG00000042215.8	chr1	33745484	33757795	Bag2	protein_coding	KNOWN	12312	378.215	-0.322417	-0.317339	0.131218	-2.45711	0.0140061	0.0331651	431.086	432.668	415.194	310.07	313.678	371.802	373.007
ENSMUSG00000042229.9	chr1	134494648	134508774	Rabif	protein_coding	KNOWN	14127	1819.6	0.0555788	0.08334	0.13583	0.40918	0.682407	0.767344	1739.43	1933.82	1606.13	1631.29	2304.58	1865.33	1656.59
ENSMUSG00000042251.12	chr1	131797381	131821473	Pm20d1	protein_coding	KNOWN	24093	346.148	0.239885	0.244559	0.129569	1.85141	0.0641105	0.119839	351.335	275.423	312.534	337.466	345.686	393.3	407.291
ENSMUSG00000042305.12	chr1	134346097	134361979	Tmem183a	protein_coding	KNOWN	15883	4806.4	0.267694	0.271109	0.0859071	3.11609	0.00183269	0.00576661	4286.07	4312.03	4297.65	5049.53	5154.35	5011.73	5533.4
ENSMUSG00000042349.13	chr1	131254343	131279606	Ikbke	protein_coding	KNOWN	25264	71.907	0.215086	0.236643	0.230656	0.932498	0.351079	0.467975	60.352	68.3674	67.0603	67.2441	74.6853	84.7303	80.9097
ENSMUSG00000042429.8	chr1	134199223	134235431	Adora1	protein_coding	KNOWN	36209	16316.7	0.261215	0.259402	0.0917039	2.84846	0.00439312	0.0122706	14831.5	14260.5	14905.6	15572	17297.1	17812.3	19537.6
ENSMUSG00000042510.7	chr1	130731976	130744622	AA986860	protein_coding	KNOWN	12647	122.281	-0.293237	-0.317137	0.19128	-1.53303	0.125269	0.207304	145.491	125.991	141.986	109.583	110.961	99.9059	122.05
ENSMUSG00000042581.14	chr1	129273302	130219278	Thsd7b	protein_coding	KNOWN	945977	986.288	0.0107399	-0.00816642	0.125485	0.0855864	0.931795	0.955044	1042.15	889.754	1036.54	896.587	1037.06	896.624	1105.31
ENSMUSG00000042641.18	chr1	153779381	153844142	Rgsl1	protein_coding	KNOWN	64762	54.5578	0.0349011	0.0280545	0.282424	0.123577	0.90165	0.933612	59.2743	42.9738	59.6091	48.5652	67.2168	64.4962	39.7692
ENSMUSG00000042671.12	chr1	153653025	153700323	Rgs8	protein_coding	KNOWN	47299	7333.6	-0.195285	-0.196185	0.0862554	-2.26404	0.0235719	0.0516234	7865.16	7954.06	7905.25	6809.08	6531.76	6813.83	7456.03
ENSMUSG00000042684.8	chr1	153503015	153550045	Npl	protein_coding	KNOWN	47031	239.487	0.29144	0.302454	0.159705	1.82486	0.0680215	0.125594	196.144	224.636	213.185	277.693	258.198	221.311	285.241
ENSMUSG00000042686.5	chr1	16964560	17097889	Jph1	protein_coding	KNOWN	133330	6133.99	0.281216	0.273141	0.0895131	3.14162	0.00168018	0.00533959	5599.8	5224.25	5619.4	6470.37	6143.4	7362.68	6518.03
ENSMUSG00000042699.11	chr1	153455758	153487660	Dhx9	protein_coding	KNOWN	31903	12427.9	0.10743	0.0988234	0.0834204	1.28781	0.197812	0.298598	12099.5	11567.8	12164.8	12427.7	13043.3	13436.7	12255.8
ENSMUSG00000042708.12	chr1	153425162	153452574	Shcbp1l	protein_coding	KNOWN	27413	440.274	0.0421248	0.0386329	0.153171	0.275018	0.783302	0.845782	415.998	440.482	444.171	410.936	433.175	546.321	390.835
ENSMUSG00000042751.14	chr1	152954993	153119261	Nmnat2	protein_coding	KNOWN	164269	11800.7	0.0215659	0.00969109	0.0827173	0.260718	0.79431	0.854167	11957.2	11281.6	12027.4	11059.2	12076.6	11783.8	12419
ENSMUSG00000042772.15	chr1	152836995	152902646	Smg7	protein_coding	KNOWN	65652	13162.5	0.863526	0.890466	0.118985	7.2574	3.9459e-13	7.47369e-12	8856.65	8824.28	8858.58	13409	15807.7	19852.2	16528.9
ENSMUSG00000042793.13	chr1	134983301	135105276	Lgr6	protein_coding	KNOWN	121976	4572.44	-0.26325	-0.255193	0.122568	-2.14779	0.0317304	0.0661592	5063.1	5159.79	4894.99	4059.55	3752.4	5148.31	3928.92
ENSMUSG00000042800.5	chr1	170308803	170312125	1700015E13Rik	protein_coding	KNOWN	3323	53.2753	-0.585043	-0.673123	0.268917	-2.17555	0.0295889	0.0623032	59.2743	66.4141	77.4091	54.7915	45.8781	41.7328	27.427
ENSMUSG00000042807.15	chr1	53806876	54195168	Hecw2	protein_coding	KNOWN	388293	1635.27	0.0644721	0.0805438	0.0970455	0.664349	0.506467	0.618349	1471.08	1758.02	1520.86	1688.57	1698.56	1649.08	1660.71
ENSMUSG00000042901.10	chr1	183296590	183325476	Aida	protein_coding	KNOWN	28887	2619.59	0.146906	0.158645	0.0903896	1.62526	0.104107	0.178468	2463.65	2499.32	2406.3	2717.16	2718.55	2615.26	2916.86
ENSMUSG00000043015.15	chr1	52630703	52651919	Tmem194b	protein_coding	KNOWN	21217	343.789	-0.653846	-0.684311	0.149987	-4.35934	1.30454e-05	6.98911e-05	444.018	422.902	448.31	232.864	285.938	317.423	255.071
ENSMUSG00000043019.12	chr1	151755371	151822051	Edem3	protein_coding	KNOWN	66681	5833.67	0.193941	0.201668	0.0896881	2.1624	0.0305877	0.0640167	5271.1	5508.46	5339.57	6946.06	6183.94	5817.3	5769.27
ENSMUSG00000043467.19	chr1	161002922	161034849	Zbtb37	protein_coding	KNOWN	31928	2361.03	-0.372233	-0.374555	0.135995	-2.7371	0.00619835	0.016547	2699.67	2806.97	2641.02	2219.05	1954.62	2471.09	1734.76
ENSMUSG00000043629.12	chr1	52922324	53020179	1700019D03Rik	protein_coding	KNOWN	97856	384.565	-0.232166	-0.239848	0.129213	-1.79677	0.0723723	0.132141	403.065	436.575	424.715	364.861	405.435	319.952	337.352
ENSMUSG00000043716.13	chr1	16101295	16104662	Rpl7	protein_coding	KNOWN	3368	14915.6	0.317936	0.339177	0.115562	2.75121	0.00593755	0.0159437	12552.1	13821	12488.1	16351.5	15076.8	15094.6	19024.7
ENSMUSG00000044055.5	chr1	92644218	92648841	Otos	protein_coding	KNOWN	4624	87.4224	-0.410619	-0.510532	0.276826	-1.48331	0.137991	0.22358	127.17	52.7406	136.19	74.7156	64.016	55.6438	101.48
ENSMUSG00000044337.5	chr1	90203980	90216751	Ackr3	protein_coding	KNOWN	12772	1134.96	-0.551161	-0.556519	0.0984055	-5.60092	2.13219e-08	1.94243e-07	1378.4	1406.42	1382.19	966.322	995.448	873.86	942.118
ENSMUSG00000044340.7	chr1	106171752	106394250	Phlpp1	protein_coding	KNOWN	222499	7422.29	0.0946572	0.0822176	0.0764008	1.23896	0.215362	0.319027	7292.89	6872.88	7379.11	7144.06	7222.07	8008.91	8036.11
ENSMUSG00000044708.5	chr1	172341210	172374085	Kcnj10	protein_coding	KNOWN	32876	18073.6	0.340739	0.326984	0.0772108	4.4131	1.01899e-05	5.58418e-05	16168.9	14877.7	16292.7	19218.1	18342.7	21334.3	20280.9
ENSMUSG00000044768.16	chr1	97606318	97662074	D1Ertd622e	protein_coding	KNOWN	55757	1923.29	-0.350642	-0.344337	0.108776	-3.22353	0.00126621	0.00415197	2137.11	2292.26	2137.24	2011.1	1702.83	1499.85	1682.65
ENSMUSG00000044783.16	chr1	88262471	88277633	Hjurp	protein_coding	KNOWN	15163	676.85	-0.05666	-0.0563313	0.121117	-0.467813	0.639918	0.732382	727.457	662.188	686.333	668.705	692.44	705.664	595.166
ENSMUSG00000044816.10	chr1	65105285	65123214	D630023F18Rik	protein_coding	KNOWN	17930	130.635	-0.434389	-0.459997	0.183164	-2.37159	0.0177118	0.0404836	139.025	170.919	154.404	115.809	121.63	112.552	100.109
ENSMUSG00000044835.15	chr1	161142691	161170498	Ankrd45	protein_coding	KNOWN	27808	4228.59	-0.354576	-0.366599	0.0907713	-3.90626	9.37353e-05	0.000413184	4855.1	4770.09	4926.45	3865.29	3720.4	3965.88	3496.94
ENSMUSG00000045005.9	chr1	64730558	64737751	Fzd5	protein_coding	KNOWN	7194	147.688	-0.0872111	-0.0884045	0.227694	-0.38302	0.701705	0.783087	140.103	156.268	162.269	95.885	134.434	203.606	141.249
ENSMUSG00000045174.10	chr1	34579657	34590944	Amer3	protein_coding	KNOWN	11288	3507.07	-1.93742	-1.98314	0.166576	-11.6308	2.87366e-31	2.54205e-29	6154.82	6049.54	6153.81	2253.92	1709.23	1140.7	1087.48
ENSMUSG00000045210.8	chr1	9718622	9748382	Vcpip1	protein_coding	KNOWN	29761	6012.07	0.0679849	0.0705334	0.101395	0.670495	0.502542	0.614714	5960.84	5677.43	5895.92	6943.57	6340.78	5749.01	5516.94
ENSMUSG00000045216.7	chr1	36068400	36106446	Hs6st1	protein_coding	KNOWN	38047	4349.33	1.06293	1.0714	0.115617	9.19354	3.80107e-20	1.59083e-18	2671.65	2561.83	2774.31	5743.14	6023.9	5980.44	4690.02
ENSMUSG00000045259.4	chr1	171358446	171360798	Klhdc9	protein_coding	KNOWN	2353	123.382	-0.23463	-0.226292	0.230707	-1.017	0.309152	0.423995	123.937	162.129	117.562	83.4324	97.0909	132.786	146.735
ENSMUSG00000045382.6	chr1	128588199	128592293	Cxcr4	protein_coding	KNOWN	4095	248.974	0.61517	0.634156	0.145732	4.22123	2.4297e-05	0.000122183	196.144	181.662	190.004	288.9	305.143	282.013	298.954
ENSMUSG00000045515.3	chr1	42695768	42703176	Pou3f3	protein_coding	KNOWN	7409	5974.19	0.139998	0.154782	0.0886769	1.57875	0.114395	0.1925	5545.92	5799.51	5487.77	6039.51	5800.91	6549.53	6596.2
ENSMUSG00000045648.15	chr1	70725715	70885397	Vwc2l	protein_coding	KNOWN	159683	135.207	-0.279448	-0.282271	0.210172	-1.32961	0.183646	0.281498	123.937	220.729	106.8	149.431	130.166	128.992	86.3951
ENSMUSG00000045658.16	chr1	84036296	84364180	Pid1	protein_coding	KNOWN	327885	1430.79	0.0992159	0.0996942	0.11048	0.898042	0.369163	0.486293	1377.32	1363.44	1383.01	1544.12	1513.98	1278.54	1555.11
ENSMUSG00000045954.7	chr1	51289126	51302960	Sdpr	protein_coding	KNOWN	13835	534.903	0.423511	0.431585	0.140091	3.02311	0.00250189	0.00757524	454.795	428.762	454.52	485.652	650.829	651.285	618.479
ENSMUSG00000045968.7	chr1	153849542	153900228	Teddm2	protein_coding	KNOWN	50687	50.5171	-0.288136	-0.332744	0.261683	-1.10109	0.270858	0.382285	66.8183	44.9272	60.0231	41.0936	44.8112	49.3206	46.6259
ENSMUSG00000046062.5	chr1	133131143	133139783	Ppp1r15b	protein_coding	KNOWN	8641	13348.3	1.82213	2.26258	0.319872	5.69645	1.22327e-08	1.16129e-07	4151.35	4309.1	4169.74	9105.34	16009.3	29221.8	26471.2
ENSMUSG00000046330.9	chr1	72711260	72713809	Rpl37a	protein_coding	KNOWN	2550	5964.74	0.415822	0.434678	0.113726	3.65635	0.000255831	0.00100709	4984.43	5025.98	4890.02	6137.89	6246.89	6400.3	8067.65
ENSMUSG00000046404.5	chr1	130717327	130724358	Yod1	protein_coding	KNOWN	7032	1736.14	-0.239047	-0.240751	0.154469	-1.54754	0.121733	0.202268	1973.29	1836.15	1900.45	1970	1607.87	1684.49	1180.73
ENSMUSG00000046836.13	chr1	183276352	183297269	Brox	protein_coding	KNOWN	20918	3811.13	-0.0204426	-0.0115354	0.0820886	-0.249032	0.803336	0.861046	3747.21	3973.13	3765.31	4065.78	3864.43	3696.52	3565.51
ENSMUSG00000046994.9	chr1	55237177	55248470	Mars2	protein_coding	KNOWN	11294	3440.4	0.580527	0.592085	0.0998168	5.81593	6.02989e-09	6.0225e-08	2552.03	2790.37	2658.82	3834.16	3878.3	4422.42	3946.75
ENSMUSG00000047021.14	chr1	74902071	74935599	Ccdc108	protein_coding	KNOWN	33529	123.244	-0.12533	-0.116335	0.196554	-0.637636	0.523711	0.633589	134.714	141.618	110.525	125.771	129.099	127.728	93.2518
ENSMUSG00000047067.7	chr1	92906981	92908435	Dusp28	protein_coding	KNOWN	1455	824.787	-0.0154961	-0.00275433	0.154791	-0.100109	0.920257	0.946896	815.829	878.033	783.198	839.305	848.212	629.786	979.144
ENSMUSG00000047216.8	chr1	110888326	110977584	Cdh19	protein_coding	KNOWN	89259	412.835	0.334786	0.361905	0.132993	2.51731	0.0118253	0.0286728	329.78	402.391	332.818	434.596	463.049	469.178	458.031
ENSMUSG00000047330.8	chr1	78816758	78820028	Kcne4	protein_coding	KNOWN	3271	104.431	1.54103	1.70157	0.236448	6.51739	7.15399e-11	9.68526e-10	51.7303	35.1604	50.0882	92.1493	141.902	154.285	205.703
ENSMUSG00000047361.15	chr1	59516264	59636417	Gm973	protein_coding	KNOWN	120154	370.986	0.476302	0.512228	0.129708	3.67212	0.000240545	0.000954394	310.382	307.654	276.934	410.936	397.966	467.914	425.119
ENSMUSG00000047369.15	chr1	181576559	181815774	Dnah14	protein_coding	KNOWN	239216	64.773	0.185404	0.223091	0.259692	0.713936	0.475267	0.588939	61.4297	65.4374	50.5022	74.7156	48.012	68.2901	85.0237
ENSMUSG00000047496.6	chr1	105276914	105356710	Rnf152	protein_coding	KNOWN	79797	321.263	0.048336	0.0489666	0.137678	0.351079	0.725529	0.801703	303.915	326.21	315.018	326.258	354.222	333.863	289.355
ENSMUSG00000047539.9	chr1	182313102	182341629	Fbxo28	protein_coding	KNOWN	28528	3304.68	-0.28939	-0.282998	0.0902191	-3.20763	0.00133832	0.00435632	3610.34	3796.35	3630.78	3383.37	3137.85	2735.4	2838.7
ENSMUSG00000047793.13	chr1	93235841	93301065	Sned1	protein_coding	KNOWN	65225	908.946	0.218706	0.220537	0.166964	1.3099	0.190229	0.289679	852.472	782.319	856.881	976.284	906.893	1243.13	744.643
ENSMUSG00000048000.15	chr1	87326998	87450796	Gigyf2	protein_coding	KNOWN	123799	5930.23	-0.403308	-0.403866	0.105193	-3.83397	0.000126092	0.000537844	6955.57	6792.79	6927.08	5800.42	5731.56	4896.65	4407.52
ENSMUSG00000048096.7	chr1	135324807	135368065	Lmod1	protein_coding	KNOWN	43259	77.0305	0.175601	0.191533	0.232379	0.755665	0.44985	0.564771	76.5177	69.3441	67.8882	72.2251	97.0909	83.4657	72.6816
ENSMUSG00000048126.16	chr1	90765923	90843971	Col6a3	protein_coding	KNOWN	78049	242.231	0.678644	0.788253	0.232273	2.92175	0.00348075	0.010043	185.367	142.595	185.451	164.374	190.981	293.395	533.455
ENSMUSG00000048174.2	chr1	132506230	132508639	Tmem81	protein_coding	KNOWN	2410	356.204	-1.59946	-1.66281	0.188219	-8.4979	1.93058e-17	6.21016e-16	594.898	580.147	579.533	262.75	210.186	131.522	134.392
ENSMUSG00000048234.13	chr1	39551296	39577405	Rnf149	protein_coding	KNOWN	26110	1912.1	0.511638	0.526812	0.114953	4.45086	8.55267e-06	4.76922e-05	1544.36	1502.13	1535.76	2603.84	2232.02	1926.03	2040.57
ENSMUSG00000048402.14	chr1	118834132	119053619	Gli2	protein_coding	KNOWN	219488	358.722	0.381098	0.386545	0.131698	2.89372	0.00380704	0.0108485	288.827	314.49	312.12	393.502	377.694	403.417	421.005
ENSMUSG00000048495.16	chr1	57388237	57407101	Tyw5	protein_coding	KNOWN	18865	622.948	-0.108692	-0.115508	0.118688	-0.915783	0.359781	0.476677	630.463	658.281	666.049	656.252	657.231	510.911	581.453
ENSMUSG00000048814.10	chr1	38793645	38836711	Lonrf2	protein_coding	KNOWN	43067	12149.3	-0.567221	-0.584984	0.0879132	-6.45206	1.1034e-10	1.43996e-09	15409.2	14246.8	15368.4	10207.4	10494.4	9412.65	9906.64
ENSMUSG00000048865.16	chr1	171388954	171410298	Arhgap30	protein_coding	KNOWN	21345	303.272	0.487557	0.483535	0.144636	3.37093	0.000749152	0.00262456	236.019	237.333	267.827	358.635	298.741	370.537	353.808
ENSMUSG00000048874.15	chr1	30802339	30873921	Phf3	protein_coding	KNOWN	71583	6733.43	-0.391738	-0.377387	0.108296	-3.6173	0.000297694	0.00115186	7659.31	8054.66	7545.52	7216.28	6241.56	5445.5	4971.15
ENSMUSG00000048960.13	chr1	10993465	11303681	Prex2	protein_coding	KNOWN	310217	10677.6	0.363232	0.360094	0.0853104	4.25777	2.06475e-05	0.000105363	9224.15	8954.18	9388.44	11024.3	10856	13081.3	12214.6
ENSMUSG00000049160.15	chr1	161154558	161159314	4930469G21Rik	antisense	KNOWN	4757	122.84	-0.675055	-0.794228	0.283874	-2.37801	0.0174062	0.0398819	156.269	143.572	186.279	98.3756	83.2208	144.168	47.9973
ENSMUSG00000049339.16	chr1	75142778	75147913	Fam134a	protein_coding	KNOWN	5136	11945.2	-0.0447283	-0.0483688	0.0831838	-0.537704	0.590781	0.693312	12314	11955.5	12254.2	12023	11864.3	11057.9	12147.4
ENSMUSG00000049439.13	chr1	60343323	60388060	Cyp20a1	protein_coding	KNOWN	44738	800.373	0.205656	0.209347	0.107601	1.91129	0.055967	0.106901	722.068	747.159	735.179	836.815	865.283	799.247	896.863
ENSMUSG00000049690.15	chr1	125913620	126830799	Nckap5	protein_coding	KNOWN	917180	533.711	0.255037	0.277479	0.14377	1.77393	0.0760753	0.137723	469.883	502.012	456.175	546.669	536.667	699.341	525.227
ENSMUSG00000049866.12	chr1	88673125	88702221	Arl4c	protein_coding	KNOWN	29097	2165.18	0.380947	0.413332	0.100187	3.80235	0.000143333	0.000600363	1797.63	1946.52	1716.25	2272.6	2337.65	2445.8	2639.85
ENSMUSG00000049881.13	chr1	157412352	157420236	2810025M15Rik	transcribed_processed_pseudogene	KNOWN	7885	1124.76	0.278506	0.308787	0.109782	2.53691	0.0111837	0.02739	1035.68	992.305	941.327	1032.32	1175.76	1367.07	1328.84
ENSMUSG00000050069.3	chr1	174833785	174921819	Grem2	protein_coding	KNOWN	88035	2856.28	0.705835	0.743013	0.133041	5.30541	1.12418e-07	9.19239e-07	2085.38	1936.75	2164.97	2451.92	2838.04	4150.52	4366.38
ENSMUSG00000050122.18	chr1	37026596	37187613	Vwa3b	protein_coding	KNOWN	161018	1780.86	0.037333	0.0414359	0.135366	0.275792	0.782708	0.845309	1839.66	1616.4	1799.04	1489.33	1556.66	2419.24	1745.73
ENSMUSG00000050229.3	chr1	172376546	172384099	Pigm	protein_coding	KNOWN	7554	1485.77	0.544795	0.542112	0.113792	4.78765	1.68746e-06	1.08652e-05	1168.24	1136.85	1230.68	1625.06	1550.25	2027.2	1662.08
ENSMUSG00000050565.16	chr1	156035403	156068861	Tor1aip2	protein_coding	KNOWN	33459	4631.74	0.426829	0.422581	0.0812465	5.2535	1.49236e-07	1.18302e-06	3915.33	3773.88	3943.72	5137.94	4988.98	5167.28	5495
ENSMUSG00000050711.7	chr1	79434669	79440120	Scg2	protein_coding	KNOWN	5452	45917.5	1.91028	2.25983	0.289372	6.60146	4.07135e-11	5.76768e-10	14409	14549.6	14560.4	35512.3	57104.4	100204	85082.7
ENSMUSG00000050777.7	chr1	120067377	120074074	Tmem37	protein_coding	KNOWN	6698	50.6153	0.269831	0.312312	0.281865	0.957307	0.338412	0.45475	52.808	40.0438	40.5673	64.7535	51.2128	40.4682	64.4535
ENSMUSG00000050840.8	chr1	104768529	104995481	Cdh20	protein_coding	KNOWN	226953	824.465	0.280346	0.315732	0.134729	2.08082	0.0374504	0.0760982	677.882	836.036	656.114	845.532	874.885	1031.94	848.866
ENSMUSG00000050967.5	chr1	39618406	39651474	Creg2	protein_coding	KNOWN	33069	7919.08	-0.946439	-0.959866	0.118706	-7.97295	1.54926e-15	4.01338e-14	10819.2	11065.8	11004.1	6898.74	5663.28	4626.02	5356.5
ENSMUSG00000051079.8	chr1	144138654	144177372	Rgs13	protein_coding	KNOWN	38719	60.282	0.41046	0.48948	0.273766	1.49931	0.133794	0.218196	44.1863	57.624	45.1208	54.7915	52.2797	73.3486	94.6232
ENSMUSG00000051185.9	chr1	95313623	95335284	Fam174a	protein_coding	KNOWN	21662	3073.04	0.341489	0.365829	0.118029	2.89326	0.0038126	0.0108596	2580.05	2766.93	2566.92	3016.02	3141.05	3387.95	4052.34
ENSMUSG00000051223.14	chr1	58392898	58407353	Bzw1	protein_coding	KNOWN	14456	14915	0.862801	0.883818	0.0865854	9.96474	2.17444e-23	1.17958e-21	9923.59	10387.9	9860.34	17289.2	18231.8	19791.5	18920.5
ENSMUSG00000051251.3	chr1	172052292	172057573	Nhlh1	protein_coding	KNOWN	5282	126.821	-0.749526	-0.772552	0.186453	-4.01991	5.82202e-05	0.000268057	167.046	184.592	146.953	99.6208	98.1578	88.5242	102.851
ENSMUSG00000051285.17	chr1	7088920	7173628	Pcmtd1	protein_coding	KNOWN	84709	7781.65	-0.0608452	-0.0640241	0.0932998	-0.652147	0.514307	0.625273	8108.72	7775.33	8054.68	8452.83	7574.16	7267.84	7237.99
ENSMUSG00000051344.13	chr1	64785983	64956824	Plekhm3	protein_coding	KNOWN	170842	3373.99	-0.0902406	-0.0970915	0.0888522	-1.01563	0.309808	0.424595	3424.97	3537.53	3550.47	3068.32	3302.16	3447.39	3287.13
ENSMUSG00000051590.9	chr1	127815253	127855031	Map3k19	protein_coding	KNOWN	39779	425.203	0.911311	0.91884	0.143926	6.3318	2.42317e-10	3.00848e-09	259.729	279.33	306.325	490.633	525.998	623.463	490.943
ENSMUSG00000051703.14	chr1	75479532	75485705	Tmem198	protein_coding	KNOWN	6174	9134.28	2.10493	2.16732	0.121483	17.327	2.94492e-67	1.14624e-64	3007.9	3143.93	2996.6	10957	13697.3	15742.1	14395.1
ENSMUSG00000051951.5	chr1	3205901	3671498	Xkr4	protein_coding	KNOWN	465598	4297.76	-0.0099722	0.00035491	0.109465	-0.0910995	0.927414	0.951922	4168.6	4541.55	4181.33	4895.12	3892.17	4072.11	4333.47
ENSMUSG00000051985.12	chr1	135953578	136006342	Igfn1	protein_coding	KNOWN	52765	43.7897	0.627805	0.752296	0.309678	2.02729	0.0426333	0.0851698	22.632	41.9971	29.8046	51.0557	49.0789	70.8194	41.1405
ENSMUSG00000052062.14	chr1	61638824	62642284	Pard3b	protein_coding	KNOWN	1003461	514.896	0.1858	0.200095	0.132707	1.40007	0.161491	0.253683	441.863	515.686	466.11	521.764	500.392	556.438	602.023
ENSMUSG00000052331.14	chr1	54645340	54926387	Ankrd44	protein_coding	KNOWN	281048	713.882	0.166796	0.169955	0.117504	1.41949	0.155757	0.246341	694.048	638.747	666.049	744.666	813.003	754.985	685.675
ENSMUSG00000052423.14	chr1	171270328	171276896	B4galt3	protein_coding	KNOWN	6569	1186.9	-0.312468	-0.323141	0.106573	-2.93195	0.00336841	0.00978044	1299.72	1350.75	1371.42	1170.54	1176.83	1024.35	914.691
ENSMUSG00000052428.10	chr1	167308378	167333978	Tmco1	protein_coding	KNOWN	25601	1912.05	-0.124188	-0.124905	0.10873	-1.14216	0.253387	0.362823	2026.1	1994.38	2001.05	1908.98	1803.12	1638.96	2011.77
ENSMUSG00000052534.15	chr1	168119364	168432270	Pbx1	protein_coding	KNOWN	312907	8797.89	0.0162753	0.0131491	0.0764612	0.212857	0.831438	0.882977	8665.9	8785.22	8805.18	8693.16	8987.84	8661.46	8986.46
ENSMUSG00000052688.12	chr1	131688695	131715439	Rab7b	protein_coding	KNOWN	26745	129.172	0.359321	0.373873	0.213984	1.6792	0.0931138	0.163051	99.1497	109.388	122.944	171.846	128.032	163.137	109.708
ENSMUSG00000052726.15	chr1	140246158	140612067	Kcnt2	protein_coding	KNOWN	365910	3927.77	0.114814	0.116442	0.100761	1.13947	0.254505	0.363823	3775.23	3714.31	3753.72	4159.17	3742.8	4497.03	3852.12
ENSMUSG00000052748.14	chr1	151367699	151428455	Swt1	protein_coding	KNOWN	60757	843.972	-0.565726	-0.5544	0.147653	-3.83147	0.00012738	0.000542891	1013.05	1073.37	1010.04	953.869	760.723	556.438	540.312
ENSMUSG00000052760.15	chr1	85717083	85778643	A630001G21Rik	protein_coding	KNOWN	61561	45.2483	0.535741	0.60936	0.275621	1.94376	0.0519243	0.100386	37.72	27.347	39.3255	58.5272	52.2797	48.056	53.4827
ENSMUSG00000053024.14	chr1	132509427	132543256	Cntn2	protein_coding	KNOWN	33830	3235.05	0.0446881	0.0421223	0.100618	0.444137	0.656944	0.746229	3177.1	3162.48	3203.99	3339.79	3237.07	3558.67	2966.23
ENSMUSG00000053286.11	chr1	151428542	151458161	Trmt1l	protein_coding	KNOWN	29620	1409.48	-0.890194	-0.897919	0.151439	-5.87825	4.14635e-09	4.23586e-08	1932.34	1884.01	1934.81	1380.99	1128.82	768.896	836.524
ENSMUSG00000053332.13	chr1	161034422	161038539	Gas5	processed_transcript	KNOWN	4118	5020.49	0.346528	0.357116	0.112318	3.08524	0.00203386	0.00633558	4328.1	4351.1	4299.31	5475.41	5160.75	5072.44	6456.32
ENSMUSG00000053333.15	chr1	86703808	87050095	Dis3l2	protein_coding	KNOWN	346288	1575.92	0.18425	0.184302	0.109736	1.67903	0.0931455	0.163088	1402.11	1505.06	1479.05	1485.6	1695.36	1817.28	1646.99
ENSMUSG00000053461.9	chr1	183418215	183436808	Hhipl2	protein_coding	KNOWN	18594	65.0496	0.0249886	0.0296225	0.232781	0.107348	0.914513	0.942806	68.9737	60.554	63.3347	61.0178	60.8152	72.084	68.5675
ENSMUSG00000053483.13	chr1	171281945	171287991	Usp21	protein_coding	KNOWN	6047	1948.49	-0.419804	-0.41224	0.110742	-3.79082	0.000150151	0.000626228	2326.78	2252.22	2234.1	1948.83	1858.6	1488.47	1530.43
ENSMUSG00000053925.4	chr1	170868645	170881721	Gm9929	processed_transcript	KNOWN	13077	62.1817	-0.34806	-0.38973	0.267807	-1.29967	0.193716	0.293757	60.352	87.901	67.4742	78.4514	46.9451	54.3792	39.7692
ENSMUSG00000053963.7	chr1	180432387	180483504	6330403A02Rik	protein_coding	KNOWN	51118	30303.5	-0.268298	-0.264969	0.118468	-2.26473	0.0235292	0.0515734	33361.7	34160.3	33028.8	31388	28623.7	22324.5	29237.2
ENSMUSG00000054135.2	chr1	181225986	181228498	A430110L20Rik	lincRNA	KNOWN	2513	169.048	-0.271785	-0.292709	0.192249	-1.41371	0.157446	0.248483	193.989	179.709	192.902	171.846	158.973	170.725	115.193
ENSMUSG00000054387.13	chr1	132959484	133030561	Mdm4	protein_coding	KNOWN	71078	10396.9	-0.0770325	-0.0781362	0.107752	-0.714908	0.474666	0.588335	10810.5	10601.8	10747	11147.6	10013.2	10695	8762.93
ENSMUSG00000054412.5	chr1	135584773	135599948	Gm4793	antisense	KNOWN	15176	69.4762	-0.0578329	-0.053212	0.236718	-0.244312	0.806989	0.863744	73.2845	79.1109	60.437	57.282	69.3506	79.6718	67.1962
ENSMUSG00000054702.14	chr1	79606876	79671972	Ap1s3	protein_coding	KNOWN	65097	164.988	-0.489957	-0.501952	0.183167	-2.67492	0.0074748	0.0193958	212.31	204.126	178.413	123.281	166.442	127.728	142.62
ENSMUSG00000054770.16	chr1	57955101	58018956	Kctd18	protein_coding	KNOWN	63856	839.307	-0.890202	-0.906138	0.140657	-6.32887	2.46955e-10	3.06118e-09	1154.23	1126.11	1152.44	765.835	654.03	542.527	479.973
ENSMUSG00000054976.14	chr1	81076950	81341764	Nyap2	protein_coding	KNOWN	264815	1388.13	-0.0614282	-0.0430398	0.096746	-0.634943	0.525466	0.635169	1384.86	1490.41	1360.25	1483.11	1480.9	1207.72	1309.64
ENSMUSG00000055013.14	chr1	89454806	89897617	Agap1	protein_coding	KNOWN	442812	9920.84	-0.231652	-0.241218	0.0781728	-2.96333	0.00304331	0.00895847	11052	10549.1	11032.7	9085.42	8849.14	9738.93	9138.68
ENSMUSG00000055067.15	chr1	178951960	179518041	Smyd3	protein_coding	KNOWN	566082	1631.23	-0.0396808	-0.0367714	0.0890052	-0.445826	0.655723	0.745506	1651.06	1668.17	1645.87	1574.01	1574.79	1644.02	1660.71
ENSMUSG00000055184.4	chr1	131527903	131539872	Fam72a	protein_coding	KNOWN	11970	80.9871	-0.202071	-0.217843	0.221634	-0.911732	0.36191	0.478805	98.072	79.1109	86.93	80.9419	64.016	79.6718	78.167
ENSMUSG00000055214.15	chr1	175962306	176275312	Pld5	protein_coding	KNOWN	313007	79.6466	0.241438	0.267143	0.219612	1.09939	0.271599	0.383019	72.2068	75.2042	66.6463	82.1872	89.6224	78.4072	93.2518
ENSMUSG00000055322.14	chr1	73910231	74124449	Tns1	protein_coding	KNOWN	214219	2066.75	0.237092	0.219633	0.110518	2.14527	0.031931	0.0665151	2013.17	1675	1979.52	1871.63	2281.1	2429.36	2217.47
ENSMUSG00000055567.16	chr1	66468367	66699866	Unc80	protein_coding	KNOWN	231500	37624.9	0.261827	0.266853	0.0976812	2.68042	0.0073529	0.0191178	33858.5	33330.1	33944.1	38167.2	36736.6	46978.5	40358.8
ENSMUSG00000055676.4	chr1	180326970	180330550	Gm5069	transcribed_processed_pseudogene	KNOWN	3581	207.903	-0.426171	-0.44992	0.165737	-2.57136	0.01013	0.0251778	233.864	242.216	260.376	151.922	161.107	196.018	209.817
ENSMUSG00000055833.14	chr1	191886130	191907527	1700034H15Rik	antisense	KNOWN	21398	503.41	-0.129975	-0.139776	0.142209	-0.913971	0.360732	0.47749	530.235	523.499	540.622	504.33	470.517	550.115	404.548
ENSMUSG00000055866.9	chr1	91415982	91459324	Per2	protein_coding	KNOWN	43343	9227.98	2.15791	2.20171	0.118471	18.2147	3.94786e-74	2.04881e-71	3154.47	2859.71	3040.89	12595.8	14583.9	15955.9	12405.2
ENSMUSG00000055980.2	chr1	82233101	82291416	Irs1	protein_coding	KNOWN	58316	1100.54	-0.789676	-0.831359	0.16207	-4.87243	1.10231e-06	7.36247e-06	1411.81	1462.09	1529.97	778.288	754.322	1092.64	674.704
ENSMUSG00000056050.12	chr1	183326725	183369553	Mia3	protein_coding	KNOWN	42829	8686.06	1.00707	1.02848	0.12562	8.01681	1.08524e-15	2.87837e-14	5550.23	5164.67	5630.58	8579.84	10981.9	13573.3	11321.9
ENSMUSG00000056055.13	chr1	87803680	87845158	Sag	protein_coding	KNOWN	41479	161	0.191098	0.204377	0.169897	1.12479	0.260678	0.370741	153.035	140.642	150.679	155.658	144.036	190.959	191.989
ENSMUSG00000056211.13	chr1	128103301	128237736	R3hdm1	protein_coding	KNOWN	134436	16378.9	0.389612	0.395927	0.102448	3.80303	0.000142937	0.000599027	14011.4	13735	13879	17687.7	18115.5	20592	16631.7
ENSMUSG00000056220.14	chr1	149829618	149961290	Pla2g4a	protein_coding	KNOWN	131673	163.439	0.353733	0.377439	0.174573	2.02627	0.0427367	0.0853533	144.414	140.642	133.707	173.091	210.186	171.99	170.047
ENSMUSG00000056268.15	chr1	138963435	139178960	Dennd1b	protein_coding	KNOWN	215526	1588.98	0.157113	0.159938	0.0959523	1.63741	0.101545	0.175097	1494.79	1485.53	1487.33	1667.4	1621.74	1778.07	1588.02
ENSMUSG00000056536.14	chr1	105518422	105663677	Pign	protein_coding	KNOWN	145256	1636.67	0.113618	0.117703	0.0998588	1.13778	0.255211	0.364611	1542.21	1582.22	1558.12	1684.84	1568.39	1845.1	1675.79
ENSMUSG00000056708.5	chr1	155096361	155099636	Ier5	protein_coding	KNOWN	3276	15729.7	3.43301	3.60073	0.150856	22.7569	1.22686e-114	1.59175e-111	2095.08	2283.47	2032.09	18057.5	22947.6	30667.3	32025.1
ENSMUSG00000056763.16	chr1	10037987	10136768	Cspp1	protein_coding	KNOWN	98782	3131.07	-0.00300867	-0.00780802	0.118644	-0.0253589	0.979769	0.987443	3225.6	3017.93	3178.74	3263.83	3091.97	3479	2660.42
ENSMUSG00000056870.9	chr1	44551511	44796838	Gulp1	protein_coding	KNOWN	245328	188.009	0.4598	0.483226	0.160003	2.8737	0.00405693	0.0114736	161.657	148.455	149.437	215.43	216.587	202.341	222.159
ENSMUSG00000057329.7	chr1	106538178	106714274	Bcl2	protein_coding	KNOWN	176097	880.813	0.402658	0.402089	0.103226	3.90075	9.58941e-05	0.000420675	727.457	746.182	758.775	982.51	937.834	977.56	1035.37
ENSMUSG00000057335.11	chr1	176733653	176814067	Cep170	protein_coding	KNOWN	80415	6791.48	-0.126782	-0.123813	0.0830819	-1.52599	0.127014	0.209634	7053.64	7244.02	7081.48	6885.04	6756.89	6514.12	6005.14
ENSMUSG00000057363.12	chr1	43746966	43827800	Uxs1	protein_coding	KNOWN	80835	3551.45	-0.0315192	-0.0241637	0.0830196	-0.37966	0.704198	0.785025	3669.62	3557.06	3529.77	3468.05	3621.17	3428.42	3586.08
ENSMUSG00000057715.13	chr1	11414105	11975901	A830018L16Rik	protein_coding	KNOWN	561797	8080.88	0.00291097	0.00687254	0.082878	0.0351236	0.971981	0.982362	8067.77	8089.82	8019.08	7726.84	7801.41	8720.9	8140.34
ENSMUSG00000058076.12	chr1	171127165	171150603	Sdhc	protein_coding	KNOWN	23439	5026.3	0.139053	0.149946	0.0923302	1.50604	0.132056	0.216055	4695.6	4850.18	4644.96	5048.29	5185.29	5035.76	5724.02
ENSMUSG00000058248.12	chr1	192190774	192510159	Kcnh1	protein_coding	KNOWN	319386	6406.35	0.00781247	0.0170284	0.0905584	0.08627	0.931252	0.954757	6320.79	6467.56	6301.18	5881.36	6061.25	6873.27	6939.03
ENSMUSG00000058267.13	chr1	160195215	160202170	Mrps14	protein_coding	KNOWN	6956	1583.67	0.0655225	0.0633978	0.114074	0.574386	0.565707	0.670945	1575.62	1499.2	1557.29	1585.22	1644.14	1427.77	1796.47
ENSMUSG00000058407.12	chr1	37985189	37997893	Txndc9	protein_coding	KNOWN	12705	3065.32	0.146921	0.150294	0.0876721	1.67581	0.0937763	0.163935	2823.61	2952.5	2876.97	3343.52	3256.28	2952.91	3251.47
ENSMUSG00000058715.11	chr1	171229572	171234365	Fcer1g	protein_coding	KNOWN	4794	307.192	0.584484	0.637808	0.155878	3.74963	0.000177098	0.000725208	238.175	255.89	205.32	369.842	307.277	352.832	421.005
ENSMUSG00000058729.13	chr1	180641150	180690694	Lin9	protein_coding	KNOWN	49545	307.881	-0.571085	-0.595369	0.208278	-2.74194	0.00610775	0.0163416	397.676	385.788	361.38	359.88	220.855	174.519	255.071
ENSMUSG00000059149.17	chr1	132022806	132068062	Mfsd4a	protein_coding	KNOWN	45257	4219.69	0.0747989	0.0860957	0.12865	0.581415	0.560961	0.666788	4050.05	4136.23	4043.07	3529.07	4276.27	5284.89	4218.27
ENSMUSG00000059498.13	chr1	171051174	171064935	Fcgr3	protein_coding	KNOWN	13762	463.013	0.305134	0.336262	0.136548	2.23464	0.0254413	0.0550056	410.609	423.878	373.385	552.896	460.915	465.384	554.026
ENSMUSG00000060244.1	chr1	171503478	171504750	Alyref2	protein_coding	KNOWN	1273	50.2089	-0.932391	-1.05182	0.263416	-3.53961	0.00040072	0.00149647	63.5851	79.1109	71.1998	42.3389	37.3427	29.0865	28.7984
ENSMUSG00000060424.14	chr1	42590782	42694842	Pantr1	lincRNA	KNOWN	104061	1853.13	0.4566	0.45757	0.117705	3.87918	0.000104807	0.000454905	1490.48	1523.62	1568.05	2060.91	2001.57	1893.15	2434.15
ENSMUSG00000060519.11	chr1	156653617	156674356	Tor3a	protein_coding	KNOWN	20740	672.423	-0.0182743	-0.00428064	0.113783	-0.160606	0.872404	0.913806	661.716	709.068	649.905	754.628	657.231	644.962	629.45
ENSMUSG00000060568.14	chr1	167001417	167091302	Fam78b	protein_coding	KNOWN	89886	1344.77	-0.629913	-0.634596	0.105842	-5.95146	2.65764e-09	2.8033e-08	1728.65	1662.31	1673.2	1135.68	1182.16	969.972	1061.43
ENSMUSG00000060679.14	chr1	42851233	42905683	Mrps9	protein_coding	KNOWN	54451	2057	-0.157502	-0.154384	0.0892731	-1.76427	0.0776873	0.140168	2136.03	2253.2	2161.66	2054.68	1952.49	1855.21	1985.72
ENSMUSG00000060743.12	chr1	180800832	180813943	H3f3a	protein_coding	KNOWN	13112	4820.83	0.412077	0.443132	0.0964853	4.27088	1.94706e-05	0.000100112	4064.06	4101.07	3832.37	4784.29	5094.61	5894.45	5974.97
ENSMUSG00000060771.14	chr1	37754776	37866429	Tsga10	protein_coding	KNOWN	111654	3896.54	0.653423	0.664534	0.0888706	7.35253	1.94495e-13	3.81852e-12	2982.03	2880.22	2898.49	4571.35	4682.77	4889.07	4371.87
ENSMUSG00000060985.15	chr1	156255296	156303664	Tdrd5	protein_coding	KNOWN	48369	320.833	-0.0390349	-0.0328347	0.144218	-0.270667	0.786647	0.848344	322.236	336.954	315.846	315.051	312.611	357.891	285.241
ENSMUSG00000061024.8	chr1	9545408	9547455	Rrs1	protein_coding	KNOWN	2048	1161.59	-0.196748	-0.208179	0.114632	-1.71635	0.0860984	0.15276	1240.45	1244.29	1289.88	1212.88	1113.88	1102.76	927.033
ENSMUSG00000061518.10	chr1	36691484	36693681	Cox5b	protein_coding	KNOWN	2198	8410.76	0.380872	0.404125	0.121256	3.14107	0.00168333	0.00534744	6849.95	7618.09	6829.8	8699.39	9318.59	8499.59	11059.9
ENSMUSG00000061816.15	chr1	66924295	66945404	Myl1	protein_coding	KNOWN	21110	56.6944	0.088888	0.108082	0.253902	0.350088	0.726272	0.802052	46.3417	66.4141	50.0882	80.9419	60.8152	44.2621	47.9973
ENSMUSG00000062169.13	chr1	181144693	181168994	Cnih4	protein_coding	KNOWN	24302	2010.44	-0.316215	-0.309054	0.105297	-3.00306	0.00267276	0.00801931	2251.34	2325.47	2201.4	2038.49	1803.12	1606.08	1847.21
ENSMUSG00000062209.15	chr1	68032186	69108059	Erbb4	protein_coding	KNOWN	1075874	4505.4	0.102057	0.112339	0.0974028	1.04778	0.29474	0.408256	4134.11	4566.95	4217.35	4776.82	4421.37	4988.97	4432.2
ENSMUSG00000062580.9	chr1	135295213	135313778	Timm17a	protein_coding	KNOWN	18566	4860.78	-0.0552999	-0.0386205	0.0915495	-0.604044	0.545815	0.653441	4799.06	5260.39	4746.38	4865.23	4713.71	4548.88	5091.82
ENSMUSG00000062590.13	chr1	86154780	86278284	Armc9	protein_coding	KNOWN	123505	1845.63	-0.212679	-0.206597	0.101968	-2.08574	0.037002	0.0752764	2005.63	2031.49	1956.75	1580.24	1768.97	1886.83	1689.5
ENSMUSG00000062729.11	chr1	171275990	171281186	Ppox	protein_coding	KNOWN	5197	1300.4	0.0913141	0.081432	0.0998551	0.914466	0.360472	0.477321	1293.26	1191.55	1291.12	1225.34	1310.19	1470.77	1320.61
ENSMUSG00000062963.10	chr1	171288563	171295024	Ufc1	protein_coding	KNOWN	6462	2444.52	0.183602	0.185961	0.125549	1.46239	0.143633	0.230991	2220.09	2295.19	2283.77	2490.52	2562.77	2224.49	3034.8
ENSMUSG00000063558.4	chr1	58029931	58106413	Aox1	protein_coding	KNOWN	76483	512.351	0.281719	0.299259	0.146556	1.92226	0.0545732	0.104804	474.194	427.785	456.175	437.086	512.128	719.575	559.511
ENSMUSG00000063659.11	chr1	177442351	177450764	Zbtb18	protein_coding	KNOWN	8414	29782.9	-0.914863	-0.929415	0.104728	-8.7356	2.42376e-18	8.51817e-17	41230.1	40278.2	41120.4	24442	21296	18716.5	21397.2
ENSMUSG00000063681.14	chr1	139197056	139377100	Crb1	protein_coding	KNOWN	180045	86.2697	0.138785	0.142749	0.227165	0.610944	0.541236	0.649492	82.984	75.2042	86.1021	89.6587	101.359	98.6413	69.9389
ENSMUSG00000064246.10	chr1	134182176	134190181	Chil1	protein_coding	KNOWN	8006	744.943	0.479775	0.501857	0.109013	4.4011	1.07702e-05	5.87941e-05	614.297	605.54	585.742	796.967	807.668	865.008	939.375
ENSMUSG00000064294.12	chr1	58113130	58200698	Aox3	protein_coding	KNOWN	87569	86.1911	-0.286486	-0.314366	0.224544	-1.27586	0.202007	0.303372	87.2948	104.505	99.3485	70.9798	78.953	92.3181	69.9389
ENSMUSG00000064302.13	chr1	118389058	118612678	Clasp1	protein_coding	KNOWN	223621	7893.26	-0.0762995	-0.0805865	0.0809253	-0.942838	0.345764	0.462083	8155.06	8072.24	8211.16	7423	7542.15	8216.31	7632.94
ENSMUSG00000065694.1	chr1	66436082	66436232	Gm25411	snRNA	KNOWN	151	82.057	1.27521	1.41016	0.241859	5.27252	1.34564e-07	1.07713e-06	44.1863	37.1138	45.1208	130.752	123.764	112.552	80.9097
ENSMUSG00000066595.9	chr1	191005847	191026158	Mfsd7b	protein_coding	KNOWN	20312	2043.13	0.794748	0.819106	0.116588	6.81675	9.31207e-12	1.45562e-10	1366.54	1474.78	1424.82	2217.81	2287.5	2927.62	2602.82
ENSMUSG00000066800.11	chr1	153749426	153764221	Rnasel	protein_coding	KNOWN	14796	377.112	0.0142628	0.0151511	0.129542	0.110102	0.912329	0.941351	344.868	406.298	373.385	383.54	379.828	385.713	366.151
ENSMUSG00000066842.18	chr1	150562524	150993435	Hmcn1	protein_coding	KNOWN	430912	318.836	-0.0231334	-0.0226482	0.166666	-0.138801	0.889607	0.925552	328.703	313.514	322.883	256.524	321.147	398.359	290.726
ENSMUSG00000066877.11	chr1	43444579	43570515	Nck2	protein_coding	KNOWN	125937	3161.19	-0.224906	-0.224159	0.0878101	-2.56128	0.0104288	0.0258082	3356	3558.04	3419.25	2913.91	3090.9	2774.6	3015.6
ENSMUSG00000067017.5	chr1	105455971	105458829	Gm3608	pseudogene	KNOWN	2859	713.166	0.335003	0.347899	0.110462	3.03275	0.00242335	0.00737186	627.23	615.307	608.51	811.91	849.279	728.428	751.5
ENSMUSG00000067028.11	chr1	99772765	100485942	Cntnap5b	protein_coding	KNOWN	713178	2570.25	-0.0716611	-0.0585194	0.113075	-0.63375	0.526244	0.635814	2569.27	2762.04	2558.64	2346.07	2342.98	2941.53	2471.17
ENSMUSG00000067071.8	chr1	91411483	91414038	Hes6	protein_coding	KNOWN	2556	581.602	-0.544593	-0.543476	0.126036	-4.32093	1.55372e-05	8.17776e-05	710.213	732.508	683.435	438.332	482.254	470.443	554.026
ENSMUSG00000067081.12	chr1	89950220	90014666	Asb18	protein_coding	KNOWN	64447	291.039	-0.419296	-0.420195	0.146641	-2.85935	0.00424513	0.0119	338.402	349.651	332.404	232.864	225.123	268.102	290.726
ENSMUSG00000067158.9	chr1	82448423	82586849	Col4a4	protein_coding	KNOWN	138427	67.4682	0.329726	0.374891	0.267045	1.23472	0.216934	0.320633	45.264	64.4607	63.3347	62.263	67.2168	101.171	68.5675
ENSMUSG00000067336.6	chr1	59763400	59879014	Bmpr2	protein_coding	KNOWN	115615	17250.9	-0.0765673	-0.0727988	0.0840264	-0.911229	0.362175	0.478952	17633.6	18025.6	17590.9	18009	16195	17009.3	16293
ENSMUSG00000067780.3	chr1	17601901	17630939	Pi15	protein_coding	KNOWN	29039	102.453	0.422191	0.451365	0.209679	2.01351	0.0440606	0.0876875	78.6731	85.9477	89.4137	136.979	118.43	89.7888	117.936
ENSMUSG00000067851.11	chr1	10137571	10232670	Arfgef1	protein_coding	KNOWN	95100	10495.1	-0.0744938	-0.073817	0.0830174	-0.897327	0.369545	0.486672	10721.1	10860.7	10827.3	11175	10565.8	9712.37	9603.57
ENSMUSG00000067879.3	chr1	9601199	9627143	3110035E14Rik	protein_coding	KNOWN	25945	7044.42	0.702519	0.757245	0.141356	4.96988	6.6996e-07	4.66485e-06	4882.04	5440.1	4833.31	6424.3	7754.47	10429.4	9547.34
ENSMUSG00000070031.11	chr1	85600378	85645037	Sp140	protein_coding	KNOWN	44660	109.327	0.374767	0.381093	0.197052	1.90187	0.0571878	0.108886	90.528	83.9943	105.144	109.583	121.63	137.845	116.565
ENSMUSG00000070034.13	chr1	85576899	85598817	Sp110	protein_coding	KNOWN	21919	48.2747	0.146876	0.168157	0.269602	0.544788	0.585899	0.689119	38.7977	51.7639	44.7068	53.5462	46.9451	56.9084	45.2546
ENSMUSG00000070532.5	chr1	169928648	169934653	Ccdc190	protein_coding	KNOWN	6006	321.836	0.305298	0.314643	0.165967	1.83951	0.0658408	0.122271	284.516	274.446	288.525	410.936	312.611	386.977	294.84
ENSMUSG00000070565.11	chr1	157135182	157412595	Rasal2	protein_coding	KNOWN	277414	13504	-0.0526625	-0.0721612	0.0984061	-0.535155	0.592543	0.694728	14543.7	12669.5	14460.6	11566	13153.2	15075.7	13059.4
ENSMUSG00000070643.11	chr1	133382303	133424377	Sox13	protein_coding	KNOWN	42075	522.497	-0.0728841	-0.06024	0.114896	-0.634347	0.525855	0.63554	521.614	568.427	514.957	520.519	506.793	510.911	514.256
ENSMUSG00000070644.13	chr1	133363572	133380336	Etnk2	protein_coding	KNOWN	16765	123.293	-0.534306	-0.576007	0.195126	-2.73826	0.00617648	0.0164999	146.569	142.595	166.409	83.4324	91.7562	107.494	124.793
ENSMUSG00000070695.4	chr1	115684756	116587323	Cntnap5a	protein_coding	KNOWN	902568	5099.32	-0.0830265	-0.0703161	0.134437	-0.617587	0.536848	0.64534	4966.11	5784.86	4974.46	5146.66	4623.02	5931.12	4269.01
ENSMUSG00000070738.10	chr1	87853287	87945180	Dgkd	protein_coding	KNOWN	91894	13595.9	0.228173	0.229166	0.0946504	2.41069	0.0159222	0.03701	12629.7	12072.7	12432.2	14271.9	14216.9	16044.4	13503.7
ENSMUSG00000070871.10	chr1	64690455	64725644	Ccnyl1	protein_coding	KNOWN	35190	2522.28	1.94648	2.38037	0.308992	6.29943	2.98747e-10	3.65373e-09	711.291	798.922	712.826	1963.78	2733.48	5646.58	5089.08
ENSMUSG00000070939.9	chr1	43047200	43098637	Tgfbrap1	protein_coding	KNOWN	51438	3495.16	-0.493378	-0.495873	0.0933641	-5.28446	1.26078e-07	1.01862e-06	4158.9	4235.85	4180.92	3313.64	3010.88	2702.52	2863.38
ENSMUSG00000072258.10	chr1	183388981	183410198	Taf1a	protein_coding	KNOWN	21218	1572.56	0.890831	0.934741	0.156176	5.70401	1.17023e-08	1.11569e-07	1021.67	1049.93	1030.33	1408.39	2085.85	2387.62	2024.11
ENSMUSG00000073478.6	chr1	191224454	191226140	D730003I15Rik	lincRNA	KNOWN	1687	144.482	0.467765	0.487904	0.187946	2.48882	0.0128168	0.0307418	102.383	125.015	125.014	178.072	142.969	171.99	165.933
ENSMUSG00000073481.9	chr1	184813068	184846451	Marc2	protein_coding	KNOWN	33384	1974.13	0.204538	0.217244	0.119088	1.71754	0.0858798	0.152441	1822.41	1814.67	1782.06	1852.95	2065.58	1986.74	2494.49
ENSMUSG00000073485.3	chr1	180813776	180816859	H3f3aos	antisense	KNOWN	3084	51.1437	-0.363993	-0.438138	0.288732	-1.26066	0.207432	0.309843	49.5748	54.694	76.1672	36.1125	42.6773	64.4962	34.2838
ENSMUSG00000073530.11	chr1	158711727	158980490	Pappa2	protein_coding	KNOWN	268764	61.3696	0.0203583	0.0267612	0.261477	0.0778588	0.93794	0.959574	53.8857	70.3208	57.9533	48.5652	64.016	75.8779	58.9681
ENSMUSG00000073557.11	chr1	134754658	134955942	Ppp1r12b	protein_coding	KNOWN	201285	10557.6	-0.0227332	-0.0121198	0.0794909	-0.285985	0.77489	0.839311	10639.2	10787.4	10398.5	10439	10094.3	11051.6	10493.6
ENSMUSG00000073609.9	chr1	93824909	93852348	D2hgdh	protein_coding	KNOWN	27440	386.48	-0.29423	-0.300543	0.13212	-2.227	0.0259475	0.055884	441.863	425.832	431.338	366.107	322.214	380.654	337.352
ENSMUSG00000073616.10	chr1	92637145	92641985	Myeov2	protein_coding	KNOWN	4841	2585.11	0.352864	0.363609	0.134988	2.61404	0.00894791	0.0226483	2248.11	2193.62	2222.1	2766.97	2769.76	2407.86	3487.34
ENSMUSG00000073627.7	chr1	86359574	86373791	C130036L24Rik	processed_transcript	KNOWN	14218	204.781	-0.76562	-0.806735	0.169126	-4.52691	5.9851e-06	3.44481e-05	265.118	259.796	288.525	145.695	123.764	184.636	165.933
ENSMUSG00000073633.9	chr1	84839841	84900487	Fbxo36	protein_coding	KNOWN	60647	72.9312	0.145976	0.160276	0.227441	0.64182	0.52099	0.63118	66.8183	70.3208	67.8882	69.7346	80.02	72.084	83.6524
ENSMUSG00000073643.11	chr1	79702262	79776143	Wdfy1	protein_coding	KNOWN	73882	3827.65	0.487265	0.49451	0.107438	4.5353	5.75212e-06	3.3267e-05	3082.26	3091.19	3134.86	3854.08	4341.35	5018.06	4271.76
ENSMUSG00000073650.8	chr1	74362108	74369321	Catip	protein_coding	KNOWN	7214	72.6493	0.21143	0.211174	0.22484	0.940355	0.347036	0.463524	60.352	57.624	81.9625	70.9798	69.3506	85.9949	82.281
ENSMUSG00000073656.4	chr1	66322276	66328796	Gm10558	antisense	KNOWN	6521	51.8994	2.183	2.59243	0.288214	7.57424	3.6123e-14	7.72873e-13	10.7771	13.6735	15.7302	61.0178	69.3506	88.5242	104.223
ENSMUSG00000073664.11	chr1	60180599	60338328	Nbeal1	protein_coding	KNOWN	157730	2521.6	0.140124	0.157134	0.102828	1.36271	0.172974	0.26815	2279.37	2537.41	2281.29	2971.19	2490.22	2617.79	2473.92
ENSMUSG00000073676.4	chr1	55088132	55091307	Hspe1	protein_coding	KNOWN	3176	3129.26	0.403121	0.407913	0.131979	3.05442	0.00225492	0.00693086	2640.4	2583.31	2686.96	3316.13	3664.91	2908.65	4104.45
ENSMUSG00000073678.4	chr1	54472994	54557684	Pgap1	protein_coding	KNOWN	84691	3270.57	0.491796	0.507198	0.0861707	5.70723	1.14827e-08	1.09745e-07	2641.48	2678.05	2588.44	3902.65	3915.64	3709.16	3458.55
ENSMUSG00000073702.11	chr1	39367842	39371911	Rpl31	protein_coding	KNOWN	4070	7875.23	0.509819	0.524881	0.132914	3.8357	0.00012521	0.000534665	6321.87	6183.35	6383.97	7979.63	8462.91	8197.34	11597.5
ENSMUSG00000073725.8	chr1	24678630	24766301	Lmbrd1	protein_coding	KNOWN	87672	10641.7	0.0650868	0.0688762	0.0758245	0.858387	0.390679	0.507576	10224.3	10541.3	10291.7	10603.4	10884.9	10994.7	10951.6
ENSMUSG00000078185.3	chr1	175682237	175692901	Chml	protein_coding	KNOWN	10665	553.053	1.03697	1.0618	0.123244	8.41395	3.96435e-17	1.24187e-15	338.402	340.861	343.994	689.874	652.963	801.776	703.503
ENSMUSG00000079045.3	chr1	190170296	190217276	Prox1os	antisense	KNOWN	46981	453.915	-0.100563	-0.0775885	0.142488	-0.705764	0.480335	0.593613	466.65	491.269	445.827	384.785	378.761	478.031	532.084
ENSMUSG00000079139.4	chr1	135231995	135233225	Gm4204	processed_pseudogene	KNOWN	1231	447.718	0.430042	0.412376	0.123061	3.49454	0.000474876	0.00174055	368.578	351.604	409.399	465.727	469.451	508.382	560.882
ENSMUSG00000079144.7	chr1	193168046	193177832	A130010J15Rik	protein_coding	KNOWN	9787	255.297	-0.459305	-0.475636	0.161818	-2.83841	0.00453384	0.0126116	316.848	292.027	303.427	235.354	244.328	177.048	218.045
ENSMUSG00000079283.2	chr1	138851983	138856852	2310009B15Rik	protein_coding	KNOWN	4870	341.977	0.046269	0.0802118	0.145424	0.318166	0.750359	0.820159	343.791	354.534	295.148	327.503	322.214	335.127	415.519
ENSMUSG00000079330.8	chr1	132191431	132259227	Lemd1	protein_coding	KNOWN	67797	68.1204	-0.246693	-0.278029	0.253167	-0.974429	0.329843	0.445775	75.44	77.1576	74.5114	61.0178	71.4845	73.3486	43.8832
ENSMUSG00000079429.9	chr1	88226986	88262289	Mroh2a	protein_coding	KNOWN	35304	82.9858	-0.0162655	-0.0173791	0.215542	-0.0754633	0.939846	0.960387	89.4503	80.0876	81.1346	77.2061	87.4885	85.9949	79.5383
ENSMUSG00000079445.3	chr1	86302832	86307305	B3gnt7	protein_coding	KNOWN	4474	45	-0.0404215	-0.0526453	0.302056	-0.133821	0.893544	0.927815	50.6526	34.1837	52.9859	57.282	36.2757	32.8804	50.74
ENSMUSG00000079470.8	chr1	78658038	78671512	Utp14b	protein_coding	KNOWN	13475	1234.42	0.698082	0.702556	0.133549	5.22717	1.72126e-07	1.34733e-06	916.057	835.06	974.858	1287.6	1285.65	1920.98	1420.72
ENSMUSG00000079550.9	chr1	59120935	59163389	Mpp4	protein_coding	KNOWN	42455	112.623	-0.0758104	-0.077079	0.195694	-0.387392	0.698466	0.780367	123.937	105.481	118.804	84.6777	101.359	125.199	128.907
ENSMUSG00000079610.9	chr1	36537507	36547445	Ankrd39	protein_coding	KNOWN	9939	401.96	-0.512102	-0.52206	0.134679	-3.80239	0.000143308	0.000600363	502.215	476.619	480.185	373.578	344.619	338.921	297.583
ENSMUSG00000079658.9	chr1	16641725	16657042	Tceb1	protein_coding	KNOWN	15318	6497.48	0.261624	0.269346	0.10427	2.50911	0.0121036	0.0292656	5623.51	6058.33	5764.29	7048.17	6998.01	6262.46	7727.56
ENSMUSG00000079671.8	chr1	9560832	9631175	2610203C22Rik	processed_transcript	KNOWN	70344	81.5236	0.654194	0.817071	0.298798	2.18942	0.0285666	0.060563	57.1188	61.5307	51.744	43.5841	73.6184	171.99	111.079
ENSMUSG00000081051.4	chr1	95498621	95499151	Gm15427	processed_pseudogene	KNOWN	531	70.4341	0.358004	0.383896	0.2406	1.48796	0.13676	0.222094	48.4971	58.6007	72.8556	75.9609	70.4176	72.084	94.6232
ENSMUSG00000081984.3	chr1	88204732	88205782	Dnajb3	protein_coding	KNOWN	1051	44.6906	-0.787509	-0.936887	0.301115	-2.61531	0.00891468	0.0225863	68.9737	56.6473	58.7812	26.1505	37.3427	42.9975	21.9416
ENSMUSG00000082057.1	chr1	66783913	66786445	Gm15789	processed_pseudogene	KNOWN	2533	77.7374	0.551728	0.604904	0.22746	2.42561	0.0152829	0.0357803	60.352	63.4841	55.8836	84.6777	93.8901	104.964	80.9097
ENSMUSG00000082431.3	chr1	99790429	99791025	Tdpx-ps1	processed_pseudogene	KNOWN	597	44.5856	-0.0627621	-0.0719436	0.300381	-0.208942	0.834494	0.885303	57.1188	39.0671	41.3952	54.7915	30.9411	36.6743	52.1113
ENSMUSG00000084416.3	chr1	64993951	64994604	Rpl10a-ps1	processed_pseudogene	KNOWN	654	74.1611	0.522216	0.591245	0.260582	2.00404	0.0450663	0.0893692	43.1086	75.2042	54.2277	69.7346	87.4885	96.112	93.2518
ENSMUSG00000084799.7	chr1	63113078	63158290	Ino80dos	lincRNA	KNOWN	45213	245.51	-0.363756	-0.387894	0.168119	-2.16369	0.0304883	0.0638555	275.895	279.33	295.976	267.731	199.516	214.987	185.132
ENSMUSG00000085894.1	chr1	39547570	39552002	Gm15832	processed_transcript	KNOWN	4433	442.916	1.11918	1.145	0.135649	8.25056	1.57658e-16	4.64004e-15	285.594	233.426	266.171	595.234	609.219	569.084	541.683
ENSMUSG00000086350.1	chr1	178313328	178318549	B230369F24Rik	antisense	KNOWN	5222	283.941	-0.309016	-0.331399	0.146677	-2.10678	0.0351364	0.0722354	323.314	304.723	336.957	272.712	224.056	252.926	272.899
ENSMUSG00000087721.1	chr1	135150666	135150766	Gm26280	rRNA	KNOWN	101	53.9468	-0.0818841	-0.0983537	0.298918	-0.273935	0.784135	0.846322	54.9634	55.6706	57.5394	61.0178	44.8112	72.084	31.5411
ENSMUSG00000088246.1	chr1	167340369	167340424	Gm25911	miRNA	KNOWN	56	148.777	0.415092	0.447793	0.267727	1.55043	0.121039	0.201374	62.5074	221.706	85.2742	231.618	146.17	154.285	139.878
ENSMUSG00000089706.7	chr1	98031116	98057680	B230216N24Rik	processed_transcript	KNOWN	26565	1114.3	2.19885	2.70217	0.315179	6.9765	3.0263e-12	5.08817e-11	276.972	252.96	276.106	848.022	1343.27	2954.18	1848.58
ENSMUSG00000089767.1	chr1	37614259	37615372	4930556I23Rik	antisense	KNOWN	1114	586.994	1.63884	1.74519	0.192737	8.50299	1.8477e-17	5.98062e-16	272.662	225.613	252.925	626.366	813.003	1220.37	698.017
ENSMUSG00000089791.1	chr1	98457768	98459162	Gm3555	processed_pseudogene	KNOWN	1395	86.385	1.57881	1.73259	0.227632	6.93579	4.03952e-12	6.6341e-11	36.6423	41.9971	32.7022	107.092	112.028	146.697	127.536
ENSMUSG00000089844.7	chr1	85083069	85109853	A530032D15Rik	protein_coding	KNOWN	26785	107.179	0.319242	0.332892	0.194859	1.63832	0.101355	0.174867	99.1497	83.9943	96.8648	107.092	118.43	122.669	122.05
ENSMUSG00000089872.10	chr1	190700202	190911770	Rps6kc1	protein_coding	KNOWN	211569	2557.21	-0.227862	-0.222554	0.0825494	-2.76031	0.00577462	0.0155626	2788.05	2823.58	2742.43	2382.18	2445.41	2372.45	2346.38
ENSMUSG00000090031.2	chr1	6209866	6215293	4732440D04Rik	antisense	KNOWN	5428	436.992	0.207036	0.20595	0.141412	1.46406	0.143176	0.230423	384.744	408.251	412.296	490.633	437.443	521.028	404.548
ENSMUSG00000090071.4	chr1	74854934	74857732	Cdk5r2	protein_coding	KNOWN	2799	11424.4	0.435222	0.45076	0.102637	4.2404	2.23119e-05	0.000113151	9380.42	9592.93	9361.53	11783.9	12062.7	12801.9	14987.5
ENSMUSG00000090272.7	chr1	173857220	173942491	Mndal	protein_coding	KNOWN	85272	134.699	-0.484628	-0.515632	0.214699	-2.25724	0.0239928	0.0524066	171.357	148.455	168.065	145.695	131.233	83.4657	94.6232
ENSMUSG00000090394.8	chr1	160044382	160080208	4930523C07Rik	protein_coding	KNOWN	35827	102.972	0.7034	0.747416	0.198899	3.53648	0.000405504	0.00151253	80.8285	66.4141	75.3393	123.281	117.363	132.786	124.793
ENSMUSG00000090553.8	chr1	133603871	133610291	Snrpe	protein_coding	KNOWN	6421	958.379	0.123105	0.128266	0.121636	1.01208	0.311502	0.426326	920.368	904.404	905.314	925.228	1018.92	901.682	1132.74
ENSMUSG00000091393.1	chr1	166306741	166309585	5330438I03Rik	antisense	KNOWN	2845	134.215	1.23249	1.35175	0.242891	5.07424	3.89045e-07	2.85979e-06	71.1291	61.5307	80.7207	183.053	189.914	235.221	117.936
ENSMUSG00000091476.6	chr1	177983423	178172704	Gm16432	protein_coding	KNOWN	189282	1054.56	0.10117	0.118461	0.126526	0.799599	0.423943	0.540305	994.73	1060.67	960.783	1209.15	1003.98	1191.28	961.317
ENSMUSG00000092083.4	chr1	15287254	15723750	Kcnb2	protein_coding	KNOWN	436497	2277.92	0.141288	0.163013	0.10419	1.35607	0.175076	0.270736	2063.82	2298.12	2034.58	2446.94	2198.95	2562.14	2340.9
ENSMUSG00000093436.6	chr1	42694925	42744791	Gm20646	sense_overlapping	KNOWN	49867	208.813	0.164152	0.181667	0.182565	0.899144	0.368576	0.485561	171.357	221.706	188.762	227.883	183.512	217.517	250.957
ENSMUSG00000094410.7	chr1	133619940	133661318	Gm38394	protein_coding	KNOWN	41379	252.109	0.0706667	0.0806198	0.164595	0.429336	0.667679	0.754744	244.641	250.03	237.609	292.636	262.466	274.425	202.96
ENSMUSG00000094497.1	chr1	43189156	43189638	Gm8210	processed_pseudogene	KNOWN	483	552.286	0.447338	0.472139	0.142025	3.14972	0.00163425	0.00521066	460.184	453.179	443.343	574.065	577.211	580.466	777.556
ENSMUSG00000096929.7	chr1	194976375	195037904	A330023F24Rik	processed_transcript	KNOWN	61530	3669.01	0.135427	0.142852	0.167603	0.808026	0.419075	0.53568	3559.69	3312.89	3516.52	4207.73	4159.97	4360.45	2565.8
ENSMUSG00000097028.2	chr1	150074873	150099963	Ptgs2os	processed_transcript	KNOWN	25091	117.398	1.24724	1.45778	0.276984	4.50295	6.70178e-06	3.80803e-05	56.0411	52.7406	67.4742	67.2441	147.237	189.695	241.358
ENSMUSG00000097063.3	chr1	42707061	42713454	Pantr2	processed_transcript	KNOWN	6394	149.115	-0.0722635	-0.0850228	0.176004	-0.410578	0.681382	0.766506	154.113	146.502	161.855	159.393	150.438	130.257	141.249
ENSMUSG00000097083.1	chr1	39650176	39657390	D930019O06Rik	antisense	KNOWN	7215	97.6995	-0.297885	-0.322581	0.22842	-1.30411	0.192196	0.291931	96.9943	123.061	110.939	68.4893	92.8232	85.9949	105.594
ENSMUSG00000097109.1	chr1	21959842	21962530	Gm26580	lincRNA	KNOWN	2689	78.4715	0.00915234	0.00341581	0.252673	0.036222	0.971105	0.981904	78.6731	70.3208	86.1021	79.6967	80.02	54.3792	100.109
ENSMUSG00000097131.1	chr1	72236465	72274869	D230017M19Rik	lincRNA	KNOWN	38405	356.254	-0.709842	-0.719352	0.132341	-5.36375	8.15139e-08	6.82306e-07	479.583	454.155	444.171	252.788	284.871	298.453	279.755
ENSMUSG00000097251.2	chr1	92908378	92910764	5033417F24Rik	antisense	KNOWN	2387	213.336	-0.341999	-0.361913	0.151778	-2.25328	0.0242413	0.0528043	245.719	236.356	250.855	197.996	189.914	184.636	187.875
ENSMUSG00000097268.1	chr1	37865299	37871388	Gm26805	antisense	KNOWN	6090	143.608	-0.299588	-0.311682	0.201434	-1.48728	0.136941	0.222296	153.035	176.779	154.818	100.866	136.567	154.285	128.907
ENSMUSG00000097316.2	chr1	192136896	192151026	Gm10516	antisense	KNOWN	14131	282.426	-0.211948	-0.220072	0.147121	-1.44063	0.149689	0.238761	312.537	293.003	316.26	246.562	224.056	271.896	312.668
ENSMUSG00000097347.1	chr1	180802568	180809483	Gm17275	lincRNA	KNOWN	6916	363.415	-0.378343	-0.378928	0.140545	-2.69196	0.0071033	0.0185805	430.008	417.041	408.985	331.239	267.8	336.392	352.437
ENSMUSG00000097433.1	chr1	136259407	136274406	Gm26781	antisense	KNOWN	15000	127.77	0.0368407	0.0265993	0.185607	0.198488	0.842664	0.891144	120.704	124.038	134.534	128.262	144.036	128.992	113.822
ENSMUSG00000097615.1	chr1	185447116	185455568	Gm2061	lincRNA	KNOWN	8453	215.193	-0.326843	-0.334657	0.154816	-2.11117	0.034758	0.071552	245.719	245.146	241.334	196.751	180.312	185.901	211.188
ENSMUSG00000097649.2	chr1	55226251	55235622	Gm10561	antisense	KNOWN	9372	352.299	0.20723	0.211401	0.13786	1.5032	0.132788	0.217025	297.449	340.861	331.162	438.332	402.234	302.247	353.808
ENSMUSG00000097680.1	chr1	135248561	135266443	Gm26642	antisense	KNOWN	17883	78.6959	-0.605859	-0.715468	0.307778	-1.96849	0.0490111	0.0958731	85.1394	102.551	116.321	38.6031	49.0789	112.552	46.6259
ENSMUSG00000097797.6	chr1	7349406	7397869	Gm26901	lincRNA	KNOWN	48464	86.8606	-1.08535	-1.20446	0.239216	-4.53712	5.70264e-06	3.29931e-05	144.414	110.365	130.395	52.3009	59.7482	68.2901	42.5119
ENSMUSG00000097814.5	chr1	96871126	96907796	Panct2	antisense	KNOWN	36671	199.424	-0.287345	-0.304129	0.161722	-1.77679	0.0756033	0.137092	228.475	215.846	226.846	161.884	195.249	177.048	190.618
ENSMUSG00000097823.2	chr1	166998295	167000841	Gm16701	lincRNA	KNOWN	2547	336.047	0.110328	0.114487	0.139535	0.790687	0.429127	0.545127	313.615	326.21	322.883	315.051	343.552	340.186	390.835
ENSMUSG00000097881.7	chr1	121087405	121178441	Celrr	lincRNA	KNOWN	91037	173.231	0.378697	0.392358	0.166888	2.26916	0.0232584	0.0510446	131.481	159.198	150.265	214.185	190.981	174.519	191.989
ENSMUSG00000097892.2	chr1	177428338	177443270	Gm26801	antisense	KNOWN	14933	73.588	-0.461394	-0.521183	0.248421	-1.85731	0.0632673	0.118534	87.2948	82.0409	97.6927	59.7725	55.4805	83.4657	49.3686
ENSMUSG00000097899.2	chr1	40076228	40085851	Gm16894	antisense	KNOWN	9624	63.1206	-0.242467	-0.267572	0.242785	-0.998691	0.317945	0.433267	74.3623	67.3908	67.8882	58.5272	64.016	49.3206	60.3394
ENSMUSG00000097970.1	chr1	23291537	23291935	Gm27028	lincRNA	KNOWN	399	83.0988	1.54796	1.6831	0.222938	6.94345	3.82627e-12	6.31953e-11	37.72	35.1604	37.2557	115.809	125.898	120.14	109.708
ENSMUSG00000098234.7	chr1	9941959	9944118	Snhg6	lincRNA	KNOWN	2160	571.452	0.43241	0.458333	0.124674	3.46833	0.000523712	0.00190195	496.826	464.899	450.794	659.988	582.545	619.669	725.444
ENSMUSG00000098259.1	chr1	162674158	162674220	Gm27616	miRNA	KNOWN	63	68.2777	0.873329	0.985829	0.256297	3.40749	0.000655643	0.00233586	39.8754	42.9738	48.4324	68.4893	75.7522	120.14	82.281
ENSMUSG00000098923.1	chr1	119526160	119528983	Tmem185b	protein_coding	KNOWN	2824	580.056	-0.561145	-0.571812	0.151587	-3.7018	0.000214071	0.000861208	747.933	668.048	724.416	574.065	547.337	384.448	414.148
ENSMUSG00000099342.1	chr1	86014403	86015886	Gm18180	processed_pseudogene	KNOWN	1484	75.7487	-0.416004	-0.443628	0.221655	-1.87681	0.0605443	0.114381	84.0617	102.551	81.1346	68.4893	71.4845	59.4377	63.0821
ENSMUSG00000099404.1	chr1	190168670	190169633	Gm28172	antisense	KNOWN	964	111.376	0.59602	0.643048	0.196238	3.03723	0.00238766	0.00727725	94.8388	73.2508	84.8602	104.602	109.894	168.196	143.992
ENSMUSG00000099784.1	chr1	42750712	42752881	Dalir	lincRNA	KNOWN	2170	78.166	0.171678	0.199708	0.224176	0.765819	0.443784	0.559093	72.2068	78.1342	65.8184	72.2251	74.6853	93.5827	90.5091
ENSMUSG00000099843.1	chr1	105979350	105990282	Gm7160	lincRNA	KNOWN	10933	70.5533	-0.0276843	-0.0200231	0.243631	-0.113632	0.909529	0.939584	68.9737	78.1342	66.2324	72.2251	58.6813	63.2316	86.3951
ENSMUSG00000099964.6	chr1	146419436	146495060	Gm29514	antisense	KNOWN	75625	71.8274	-0.459346	-0.510859	0.240186	-1.91246	0.0558171	0.106693	86.2171	82.0409	91.4835	53.5462	57.6144	78.4072	53.4827
ENSMUSG00000100009.6	chr1	98589517	98607384	Gm7967	lincRNA	KNOWN	17868	48.7362	1.02067	1.26895	0.319896	3.19064	0.00141956	0.00459578	22.632	35.1604	23.1813	42.3389	46.9451	103.7	67.1962
ENSMUSG00000100131.1	chr1	24611535	24612410	Gm28439	unprocessed_pseudogene	KNOWN	876	133.923	0.245918	0.228016	0.230946	1.06483	0.286954	0.40025	135.792	76.1809	153.99	133.243	126.965	113.817	197.474
ENSMUSG00000100147.2	chr1	182287990	182303325	1700047M11Rik	lincRNA	KNOWN	15336	457.181	0.344801	0.344502	0.122176	2.82218	0.0047699	0.0131788	383.666	399.461	405.259	491.878	514.262	529.881	475.859
ENSMUSG00000100213.1	chr1	46849529	46850479	Gm28151	lincRNA	KNOWN	951	277.851	-0.453942	-0.469711	0.146291	-3.103	0.00191568	0.00600346	344.868	311.56	334.473	226.637	208.052	280.748	238.615
ENSMUSG00000100215.1	chr1	55335401	55335796	Gm8292	processed_pseudogene	KNOWN	396	120.412	0.342808	0.376036	0.205804	1.6657	0.0957735	0.166751	95.9165	114.271	98.5206	134.488	121.63	117.611	160.448
ENSMUSG00000100455.1	chr1	143777642	143781307	Gm29170	sense_intronic	KNOWN	3666	692.966	-0.0624392	-0.0598418	0.146853	-0.425183	0.670703	0.757448	731.768	700.278	696.268	730.968	644.428	791.659	555.397
ENSMUSG00000100546.1	chr1	92714234	92717202	Gm29483	lincRNA	KNOWN	2969	112.605	-0.140611	-0.161887	0.21556	-0.652304	0.514205	0.625198	120.704	106.458	132.465	94.6398	100.292	91.0535	142.62
ENSMUSG00000100594.1	chr1	151748949	151755018	2810414N06Rik	lincRNA	KNOWN	6070	67.7593	-0.453448	-0.505175	0.23967	-1.89197	0.0584954	0.110995	67.896	91.8077	84.8602	53.5462	64.016	51.8499	60.3394
ENSMUSG00000100690.1	chr1	150268926	150269261	Gm4322	processed_pseudogene	KNOWN	336	68.3545	0.338578	0.39095	0.247251	1.36937	0.170884	0.265597	54.9634	67.3908	51.744	62.263	66.1498	92.3181	83.6524
ENSMUSG00000100862.1	chr1	24613974	24614651	Gm10925	unprocessed_pseudogene	KNOWN	678	236.157	0.325141	0.256688	0.174286	1.86556	0.0621027	0.116801	198.299	152.362	286.869	244.071	212.32	231.428	327.753
ENSMUSG00000100954.4	chr1	151339604	151345231	Gm10138	antisense	KNOWN	5628	70.7968	0.09575	0.108509	0.253553	0.377633	0.705703	0.78614	51.7303	82.0409	69.544	73.4704	62.949	70.8194	85.0237
ENSMUSG00000100980.1	chr1	91798528	91802937	Gm29100	antisense	KNOWN	4410	62.387	-0.165378	-0.188545	0.277877	-0.595148	0.551745	0.658549	75.44	59.5773	66.2324	61.0178	74.6853	36.6743	63.0821
ENSMUSG00000101111.1	chr1	24613189	24613971	Gm28437	unprocessed_pseudogene	KNOWN	783	144.748	0.280991	0.260304	0.186239	1.50877	0.131358	0.215138	130.403	93.7611	165.995	123.281	116.296	168.196	215.302
ENSMUSG00000101122.1	chr1	55066264	55067069	Gm17971	processed_pseudogene	KNOWN	806	108.006	2.13253	2.34575	0.217874	9.78791	1.26893e-22	6.3935e-21	37.72	26.3703	33.1162	105.847	121.63	202.341	229.016
ENSMUSG00000101188.1	chr1	60703932	60705149	Eif4a-ps4	processed_pseudogene	KNOWN	1218	255.915	1.56732	1.62139	0.19135	8.19087	2.59335e-16	7.38133e-15	93.7611	99.6211	157.716	245.316	343.552	392.036	459.402
ENSMUSG00000101249.1	chr1	24615706	24616197	Gm29216	unprocessed_pseudogene	KNOWN	492	237.15	0.45823	0.419765	0.160407	2.85666	0.0042812	0.0119881	207.999	144.548	243.818	229.128	231.524	264.308	338.724
ENSMUSG00000101299.2	chr1	42261855	42304412	Gm28175	lincRNA	KNOWN	42558	72.5367	0.115055	0.132233	0.257698	0.446473	0.655256	0.745137	52.808	91.8077	61.6789	97.1303	61.8821	67.0255	75.4243
ENSMUSG00000101337.6	chr1	46425592	46807476	Dnah7c	protein_coding	KNOWN	381885	90.7647	-0.0491722	-0.061852	0.216638	-0.226979	0.82044	0.874653	100.227	81.0643	97.6927	97.1303	87.4885	93.5827	78.167
ENSMUSG00000101429.1	chr1	57200645	57214993	BC055402	lincRNA	KNOWN	14349	67.5797	0.405966	0.452721	0.250294	1.62196	0.104813	0.179322	45.264	57.624	64.5766	64.7535	65.0829	94.8474	80.9097
ENSMUSG00000101450.1	chr1	82739691	82740707	Gm28941	sense_intronic	KNOWN	1017	112.27	-0.59976	-0.615105	0.209069	-2.86871	0.00412148	0.0116266	134.714	169.942	115.493	128.262	92.8232	73.3486	71.3102
ENSMUSG00000101523.1	chr1	156524012	156526664	Gm10031	protein_coding	KNOWN	2653	49.4604	-0.249915	-0.291815	0.26864	-0.930297	0.352218	0.469166	43.1086	57.624	64.9905	53.5462	44.8112	34.145	47.9973
ENSMUSG00000101586.1	chr1	59151047	59169320	Gm29017	antisense	KNOWN	18274	83.0127	-0.928191	-1.07512	0.295116	-3.14518	0.00165986	0.00528367	126.093	103.528	126.255	97.1303	52.2797	44.2621	31.5411
ENSMUSG00000101599.1	chr1	63117118	63126837	Gm20342	lincRNA	KNOWN	9720	622.88	-0.683752	-0.692966	0.153365	-4.45833	8.25998e-06	4.61427e-05	872.948	764.739	751.737	596.48	459.848	507.117	407.291
ENSMUSG00000101795.2	chr1	143093347	143094616	Gm5835	processed_pseudogene	KNOWN	1270	51.5821	0.248126	0.276605	0.276943	0.895945	0.370282	0.487314	51.7303	34.1837	52.158	43.5841	58.6813	48.056	72.6816
ENSMUSG00000101840.1	chr1	75252322	75257427	Gm28294	antisense	KNOWN	5106	108.567	1.69454	1.90603	0.25743	6.58255	4.62462e-11	6.45746e-10	47.4194	34.1837	45.1208	102.111	160.04	233.957	137.135
ENSMUSG00000101939.1	chr1	24612775	24613119	Gm28438	unprocessed_pseudogene	KNOWN	345	1206.42	0.500464	0.518303	0.149419	3.34941	0.000809847	0.00281064	966.709	948.354	987.276	1324.96	1187.5	1225.43	1804.7
ENSMUSG00000101995.1	chr1	92842177	92848771	Gm29480	antisense	KNOWN	6595	62.5075	1.43267	1.66717	0.283511	5.05332	4.34184e-07	3.16027e-06	21.5543	32.2304	29.8046	64.7535	90.6893	117.611	80.9097
ENSMUSG00000102059.1	chr1	58652641	58655831	Gm20257	transcribed_unprocessed_pseudogene	KNOWN	3191	94.0801	-0.20911	-0.221422	0.219681	-0.951878	0.341159	0.457469	105.616	100.598	101.004	94.6398	69.3506	103.7	83.6524
ENSMUSG00000102070.1	chr1	24614885	24615565	Gm28661	unprocessed_pseudogene	KNOWN	681	153.434	0.338826	0.293849	0.199414	1.69911	0.0892988	0.157594	139.025	86.9243	181.725	150.677	157.906	147.962	209.817
ENSMUSG00000102162.1	chr1	192888571	192889042	Gm2367	processed_pseudogene	KNOWN	472	93.1911	-0.187019	-0.20575	0.228607	-0.818081	0.413311	0.529878	106.694	92.7844	103.074	109.583	73.6184	89.7888	76.7956
ENSMUSG00000102302.1	chr1	165230371	165235125	Gm38190	sense_intronic	KNOWN	4755	497.134	-0.123311	-0.137571	0.141853	-0.869282	0.384693	0.501447	517.303	512.756	543.105	505.576	429.974	548.85	422.376
ENSMUSG00000102336.1	chr1	34427002	34433264	Gm37233	lincRNA	KNOWN	6263	189.943	-0.236123	-0.254588	0.212536	-1.11098	0.266577	0.377269	214.465	200.219	213.185	200.487	128.032	225.104	148.106
ENSMUSG00000102374.1	chr1	66769290	66771866	Gm38387	TEC	KNOWN	2577	187.638	0.490851	0.529548	0.199201	2.46409	0.0137361	0.03264	141.181	157.245	150.679	215.43	170.709	280.748	197.474
ENSMUSG00000102413.1	chr1	172322994	172323661	Gm36937	antisense	KNOWN	668	109.154	-0.97566	-1.03944	0.218021	-4.47508	7.6382e-06	4.29466e-05	145.491	166.035	151.92	105.847	84.2877	55.6438	54.854
ENSMUSG00000102416.4	chr1	36710149	36757953	4933424G06Rik	protein_coding	KNOWN	47805	74.7451	-0.149129	-0.155877	0.234129	-0.636952	0.524156	0.633882	90.528	75.2042	72.4416	51.0557	73.6184	82.201	78.167
ENSMUSG00000102465.1	chr1	25735389	25738969	Gm38198	TEC	KNOWN	3581	46.651	0.171768	0.19856	0.26512	0.647888	0.517057	0.627587	45.264	41.9971	41.8092	44.8294	43.7443	58.173	50.74
ENSMUSG00000102483.1	chr1	177808550	177962233	Gm7068	unprocessed_pseudogene	KNOWN	153684	485.631	0.0959678	0.0986483	0.118898	0.807145	0.419583	0.536153	472.039	462.945	465.282	506.821	509.994	514.705	467.631
ENSMUSG00000102493.1	chr1	178143301	178144272	Gm8010	unprocessed_pseudogene	KNOWN	972	118.297	0.164402	0.183293	0.202802	0.810654	0.417564	0.534231	121.782	107.435	100.176	125.771	125.898	144.168	102.851
ENSMUSG00000102526.1	chr1	185329451	185331858	Gm37785	TEC	KNOWN	2408	50.4602	-0.477919	-0.567112	0.284964	-1.67712	0.0935192	0.163577	57.1188	54.694	74.0975	37.3578	41.6104	58.173	30.1697
ENSMUSG00000102559.1	chr1	66765626	66768731	Gm37570	TEC	KNOWN	3106	312.511	0.641184	0.658097	0.164233	3.90412	9.45681e-05	0.000416383	217.698	235.379	251.683	331.239	344.619	464.12	342.838
ENSMUSG00000102723.1	chr1	126070140	126071461	Gm37936	TEC	KNOWN	1322	83.6726	-0.748671	-0.822803	0.241446	-3.10078	0.00193014	0.00604038	123.937	101.574	108.455	64.7535	50.1459	84.7303	52.1113
ENSMUSG00000102752.1	chr1	170298199	170306332	Gm7694	protein_coding	KNOWN	8134	404.844	-0.25184	-0.245678	0.136001	-1.85176	0.0640607	0.119774	432.163	473.689	428.027	366.107	346.753	422.387	364.779
ENSMUSG00000102776.1	chr1	66775511	66780107	Gm38162	TEC	KNOWN	4597	178.321	0.223391	0.239336	0.215617	1.03606	0.300176	0.414275	137.947	185.569	161.441	216.675	167.508	236.486	142.62
ENSMUSG00000102929.1	chr1	171354126	171355415	Gm37154	TEC	KNOWN	1290	92.8956	1.04801	1.162	0.242192	4.3272	1.5102e-05	7.96758e-05	54.9634	58.6007	49.6743	103.357	126.965	159.344	97.3659
ENSMUSG00000102976.5	chr1	133619862	133661380	Zc3h11a	protein_coding	KNOWN	41519	980.644	0.309371	0.324448	0.138249	2.23778	0.0252356	0.054652	834.151	887.8	849.43	1268.92	1055.2	1124.26	844.752
ENSMUSG00000103032.1	chr1	62809302	62811857	Gm37121	TEC	KNOWN	2556	168.136	-0.317917	-0.346811	0.24216	-1.31284	0.189239	0.288537	204.766	174.825	194.972	122.036	129.099	241.545	109.708
ENSMUSG00000103046.1	chr1	38992678	38994316	Gm37309	TEC	KNOWN	1639	138.391	-0.0266442	-0.0411955	0.227895	-0.116914	0.906928	0.937588	122.859	145.525	153.576	139.469	129.099	180.842	97.3659
ENSMUSG00000103076.1	chr1	80274731	80276413	Gm37902	TEC	KNOWN	1683	381.276	2.60901	2.78824	0.185352	14.076	5.33548e-45	9.12836e-43	82.984	86.9243	91.4835	398.483	511.061	806.835	691.161
ENSMUSG00000103186.1	chr1	159337414	159337819	Gm37088	TEC	KNOWN	406	58.2335	1.85387	2.09858	0.26459	7.00657	2.44229e-12	4.14205e-11	23.7097	17.5802	19.4558	97.1303	78.953	88.5242	82.281
ENSMUSG00000103272.1	chr1	86120883	86123561	Gm37914	TEC	KNOWN	2679	66.3215	-0.066174	-0.0677102	0.232299	-0.284866	0.775747	0.840006	68.9737	73.2508	62.0928	68.4893	69.3506	64.4962	57.5967
ENSMUSG00000103280.1	chr1	4905751	4906861	Gm37277	TEC	KNOWN	1111	167.975	0.448535	0.487867	0.171097	2.62153	0.00875362	0.0222506	153.035	127.945	128.739	171.846	154.705	235.221	204.331
ENSMUSG00000103329.2	chr1	6861237	6864151	Gm42492	TEC	KNOWN	2915	242.91	-0.387362	-0.405268	0.165218	-2.34455	0.0190502	0.0430655	307.148	257.843	282.315	210.449	188.847	261.779	191.989
ENSMUSG00000103375.1	chr1	66690630	66692356	Gm37181	TEC	KNOWN	1727	373.096	-0.174721	-0.191476	0.161427	-1.08235	0.279095	0.391498	394.443	390.671	419.748	393.502	368.092	381.919	263.299
ENSMUSG00000103382.1	chr1	66812315	66814493	Gm37755	TEC	KNOWN	2179	118.72	0.624285	0.685314	0.223966	2.7874	0.00531321	0.0144592	92.6834	85.9477	85.6881	190.525	125.898	137.845	112.451
ENSMUSG00000103400.1	chr1	166377878	166379918	Gm15853	lincRNA	KNOWN	2041	95.5139	-0.0545998	-0.0578259	0.238524	-0.228907	0.818941	0.873616	112.082	87.901	93.1393	94.6398	101.359	67.0255	112.451
ENSMUSG00000103443.1	chr1	195079099	195081336	Gm37132	TEC	KNOWN	2238	66.866	-0.524566	-0.565403	0.238514	-2.1993	0.0278563	0.0593026	89.4503	88.8777	67.8882	47.3199	56.5474	64.4962	53.4827
ENSMUSG00000103509.1	chr1	7148110	7152137	Gm38372	TEC	KNOWN	4028	446.802	-0.0263455	0.00806668	0.138543	-0.19016	0.849183	0.895727	431.086	487.362	417.678	561.612	514.262	343.98	371.636
ENSMUSG00000103543.1	chr1	153443481	153444300	Gm37669	TEC	KNOWN	820	54.3938	-0.159412	-0.192411	0.257837	-0.618267	0.5364	0.64493	50.6526	54.694	70.3719	56.0367	46.9451	58.173	43.8832
ENSMUSG00000103636.1	chr1	180145481	180148151	Gm38331	TEC	KNOWN	2671	47.3703	0.979809	1.13911	0.285525	3.43161	0.000600021	0.00215148	31.2537	24.4169	28.5627	82.1872	58.6813	54.3792	52.1113
ENSMUSG00000103649.1	chr1	180743210	180755836	Gm37768	antisense	KNOWN	12627	67.2718	-0.182576	-0.194183	0.246428	-0.74089	0.45876	0.573452	70.0514	79.1109	68.3021	59.7725	59.7482	54.3792	79.5383
ENSMUSG00000103685.1	chr1	191249424	191251266	Gm37074	TEC	KNOWN	1843	65.6141	-0.52836	-0.612912	0.284481	-1.85728	0.0632718	0.118534	87.2948	70.3208	87.7579	69.7346	59.7482	55.6438	28.7984
ENSMUSG00000103711.1	chr1	171418872	171420352	Tstd1	protein_coding	KNOWN	1481	45.365	-0.986132	-1.15838	0.284041	-3.47179	0.000517001	0.00188065	74.3623	47.8572	76.5812	26.1505	29.8741	36.6743	26.0557
ENSMUSG00000103723.1	chr1	191000594	191000798	Gm37095	processed_pseudogene	KNOWN	205	81.0081	0.237443	0.250426	0.215825	1.10016	0.271262	0.382717	71.1291	70.3208	77.823	94.6398	88.5554	80.9364	83.6524
ENSMUSG00000103804.1	chr1	38076295	38077305	Gm37062	sense_intronic	KNOWN	1011	73.6872	-0.292087	-0.310258	0.238571	-1.22432	0.220832	0.325426	84.0617	87.901	76.5812	89.6587	67.2168	56.9084	53.4827
ENSMUSG00000103821.1	chr1	59646200	59648071	D430013B06Rik	TEC	KNOWN	1872	87.4696	0.242204	0.257986	0.255615	0.947534	0.343367	0.459781	75.44	70.3208	90.2416	98.3756	107.76	112.552	57.5967
ENSMUSG00000103839.1	chr1	58383512	58386134	Gm37607	TEC	KNOWN	2623	535.488	-0.355142	-0.376557	0.153917	-2.30736	0.0210349	0.0468718	647.706	569.403	632.105	474.444	436.376	589.318	399.063
ENSMUSG00000103845.1	chr1	6429655	6441296	Gm19026	processed_pseudogene	KNOWN	11642	99.3456	-0.743253	-0.795772	0.211432	-3.51533	0.00043921	0.00162695	140.103	126.968	126.255	82.1872	69.3506	84.7303	65.8248
ENSMUSG00000103867.1	chr1	195013746	195016448	9630010A21Rik	TEC	KNOWN	2703	92.0537	-0.547817	-0.650382	0.284481	-1.92567	0.0541453	0.104111	113.16	98.6445	136.604	82.1872	70.4176	104.964	38.3978
ENSMUSG00000103922.1	chr1	4771131	4772199	Gm6123	processed_pseudogene	KNOWN	1069	151.802	-0.0279314	-0.0108504	0.179994	-0.155179	0.87668	0.916842	143.336	172.872	141.158	181.808	169.642	112.552	141.249
ENSMUSG00000103928.1	chr1	151445305	151447741	Gm37893	TEC	KNOWN	2437	232.868	-0.890306	-0.922727	0.213035	-4.17914	2.92608e-05	0.000144165	351.335	315.467	290.181	249.052	177.111	128.992	117.936
ENSMUSG00000103945.1	chr1	43560273	43561565	Gm38228	TEC	KNOWN	1293	120.253	0.216039	0.255385	0.283479	0.762098	0.446002	0.560926	126.093	89.8544	108.869	168.11	142.969	144.168	61.7108
ENSMUSG00000103964.1	chr1	191001425	191001851	Gm8407	processed_pseudogene	KNOWN	427	182.36	0.0680602	0.0651491	0.173272	0.392794	0.694472	0.776964	164.89	185.569	182.553	174.336	192.048	211.193	165.933
ENSMUSG00000103973.1	chr1	95328681	95331218	BC055308	TEC	KNOWN	2538	69.9497	0.218908	0.251404	0.246262	0.888923	0.374045	0.49102	62.5074	57.624	69.13	67.2441	54.4136	75.8779	102.851
ENSMUSG00000103983.1	chr1	171320601	171326177	Gm20045	lincRNA	KNOWN	5577	647.9	-0.661149	-0.685124	0.185039	-3.57302	0.000352881	0.00134098	828.762	821.386	829.146	617.649	598.549	529.881	309.925
ENSMUSG00000103984.1	chr1	87036723	87039650	Gm37447	TEC	KNOWN	2928	57.3023	0.192615	0.230598	0.273282	0.704821	0.480922	0.594103	51.7303	45.9039	58.7812	54.7915	38.4096	89.7888	61.7108
ENSMUSG00000104002.2	chr1	34809360	34811908	Gm38336	antisense	KNOWN	2549	116.978	-0.812412	-0.865515	0.20735	-3.91806	8.92642e-05	0.000395603	163.813	156.268	152.748	88.4135	74.6853	107.494	75.4243
ENSMUSG00000104010.1	chr1	195042383	195044679	Gm37366	TEC	KNOWN	2297	168.232	-0.563293	-0.593474	0.201958	-2.78916	0.00528449	0.0143886	233.864	199.242	192.074	139.469	135.5	173.255	104.223
ENSMUSG00000104011.1	chr1	164462442	164463989	Gm32391	lincRNA	KNOWN	1548	126.378	-0.211207	-0.232246	0.201037	-1.05059	0.293447	0.407117	151.958	119.155	143.227	133.243	123.764	104.964	108.337
ENSMUSG00000104018.1	chr1	78465448	78466926	4833412K13Rik	TEC	KNOWN	1479	39.1341	-1.52237	-1.83554	0.314149	-4.84603	1.25956e-06	8.30934e-06	68.9737	68.3674	62.0928	26.1505	23.4725	13.9109	10.9708
ENSMUSG00000104077.1	chr1	195017892	195018242	Gm37027	lincRNA	KNOWN	351	60.3585	-0.224414	-0.265199	0.316088	-0.709974	0.47772	0.591273	68.9737	71.2975	60.0231	69.7346	66.1498	65.7608	20.5703
ENSMUSG00000104097.1	chr1	177989662	177998739	Gm37313	unprocessed_pseudogene	KNOWN	9078	93.8517	-0.64237	-0.671813	0.205691	-3.12298	0.00179029	0.00564803	122.859	130.875	103.902	80.9419	73.6184	72.084	72.6816
ENSMUSG00000104117.5	chr1	164863133	164936775	Gm20743	processed_transcript	KNOWN	73643	78.1614	0.342571	0.381688	0.22233	1.54082	0.12336	0.204666	64.6628	75.2042	60.0231	83.4324	81.0869	93.5827	89.1378
ENSMUSG00000104154.1	chr1	176751521	176753415	Gm38104	TEC	KNOWN	1895	209.092	-0.0338041	-0.0319419	0.177408	-0.190545	0.848882	0.895591	207.999	214.869	212.358	259.014	202.717	204.87	161.819
ENSMUSG00000104164.1	chr1	127978905	127984687	Gm38248	TEC	KNOWN	5783	69.4518	0.114224	0.115628	0.244206	0.467736	0.639973	0.732382	57.1188	66.4141	75.3393	62.263	74.6853	87.2596	63.0821
ENSMUSG00000104237.1	chr1	36739048	36744792	Gm33533	lincRNA	KNOWN	5745	138.103	-0.0998417	-0.0985108	0.204001	-0.489418	0.624546	0.72085	143.336	143.572	143.641	135.733	99.2248	168.196	133.021
ENSMUSG00000104245.1	chr1	187344970	187377469	Gm38155	antisense	KNOWN	32500	156.915	-0.756731	-0.817305	0.191664	-3.94822	7.87338e-05	0.000352649	205.843	196.312	223.12	118.3	112.028	145.433	97.3659
ENSMUSG00000104253.1	chr1	121328092	121331149	Gm37174	TEC	KNOWN	3058	115.169	-1.16263	-1.23332	0.203943	-5.70075	1.1928e-08	1.13374e-07	167.046	182.639	164.753	77.2061	60.8152	79.6718	74.0529
ENSMUSG00000104279.1	chr1	178339601	178341470	Gm38300	TEC	KNOWN	1870	91.4802	-0.104883	-0.110673	0.208938	-0.501983	0.61568	0.713453	89.4503	103.528	93.5532	82.1872	92.8232	91.0535	87.7664
ENSMUSG00000104348.1	chr1	193281271	193283843	Gm37691	TEC	KNOWN	2573	80.5545	0.0688122	0.0698484	0.23075	0.298211	0.765543	0.832081	82.984	71.2975	80.7207	88.4135	87.4885	88.5242	64.4535
ENSMUSG00000104358.1	chr1	34823525	34826560	Gm37127	TEC	KNOWN	3036	175.676	0.340719	0.377563	0.214224	1.59048	0.111727	0.188951	168.123	130.875	151.093	141.96	166.442	298.453	172.79
ENSMUSG00000104391.1	chr1	177035040	177036936	Gm37960	TEC	KNOWN	1897	54.5547	-0.207207	-0.238813	0.267522	-0.774543	0.438609	0.554271	62.5074	54.694	62.0928	59.7725	50.1459	55.6438	37.0265
ENSMUSG00000104394.2	chr1	187236457	187240357	Gm37254	TEC	KNOWN	3901	238.08	0.225259	0.227586	0.153649	1.46606	0.142633	0.229756	216.621	210.962	223.12	285.165	252.863	252.926	224.901
ENSMUSG00000104415.1	chr1	182494156	182498297	Gm37069	TEC	KNOWN	4142	356.843	0.373476	0.411667	0.160329	2.32944	0.0198357	0.0446598	313.615	298.863	288.111	283.919	381.962	467.914	463.516
ENSMUSG00000104416.1	chr1	33889490	33891117	Gm37067	TEC	KNOWN	1628	64.0512	-0.276559	-0.318604	0.243875	-1.13402	0.256787	0.366378	80.8285	57.624	78.237	53.5462	57.6144	67.0255	53.4827
ENSMUSG00000104435.1	chr1	189879935	189884652	Gm37422	antisense	KNOWN	4718	284.069	-0.781385	-0.797491	0.167342	-4.6694	3.02085e-06	1.84208e-05	375.044	386.764	363.45	280.184	231.524	189.695	161.819
ENSMUSG00000104475.1	chr1	34236596	34238820	D630036G22Rik	TEC	KNOWN	2225	59.5689	0.541336	0.603662	0.244677	2.21245	0.0269354	0.0576675	45.264	44.9272	47.6045	64.7535	60.8152	80.9364	72.6816
ENSMUSG00000104487.1	chr1	190992692	190994677	Gm31373	lincRNA	KNOWN	1986	60.0888	-0.607548	-0.728042	0.305578	-1.98819	0.0467903	0.0922592	74.3623	74.2275	84.4463	52.3009	38.4096	70.8194	26.0557
ENSMUSG00000104516.1	chr1	25830657	25831878	Gm9884	TEC	KNOWN	1222	55.2113	0.257302	0.32892	0.275531	0.933838	0.350388	0.467253	50.6526	50.7872	43.051	37.3578	42.6773	79.6718	82.281
ENSMUSG00000109887.1	chr1	17994462	18059056	RP24-571A14.6	processed_transcript	KNOWN	64595	74.0949	-0.0185308	-0.0197412	0.234126	-0.0791487	0.936914	0.95865	72.2068	78.1342	73.6835	61.0178	78.953	84.7303	69.9389
ENSMUSG00000000290.13	chr10	77530252	77565708	Itgb2	protein_coding	KNOWN	35457	275.314	0.290785	0.306632	0.150355	1.934	0.0531136	0.102406	266.195	226.589	234.711	306.334	289.139	331.333	272.899
ENSMUSG00000000295.12	chr10	31313382	31328204	Hddc2	protein_coding	KNOWN	14823	889.384	0.0670801	0.0764716	0.143102	0.468756	0.639244	0.731836	891.269	850.686	845.704	846.777	882.354	780.278	1128.62
ENSMUSG00000000296.7	chr10	31332380	31445921	Tpd52l1	protein_coding	KNOWN	113542	1576.92	0.194174	0.212022	0.126549	1.53438	0.124936	0.20685	1413.96	1490.41	1433.93	1485.6	1474.5	1685.75	2054.28
ENSMUSG00000000374.7	chr10	78186725	78244642	Trappc10	protein_coding	KNOWN	57918	7175.53	-0.129873	-0.130626	0.0904822	-1.43534	0.15119	0.24065	7583.87	7525.3	7537.66	6883.8	6776.09	6467.33	7454.66
ENSMUSG00000000711.2	chr10	128677193	128696268	Rab5b	protein_coding	KNOWN	19076	8162.9	0.00316363	0.00109724	0.0849034	0.0372616	0.970276	0.98137	7920.12	8366.22	8191.7	8515.09	8100.16	7628.26	8418.72
ENSMUSG00000000732.8	chr10	78069360	78079525	Icosl	protein_coding	KNOWN	10166	677.921	-0.00338386	0.00234631	0.119186	-0.0283915	0.97735	0.985478	686.504	676.838	668.533	727.232	608.152	666.461	711.731
ENSMUSG00000000766.18	chr10	6758506	7038198	Oprm1	protein_coding	KNOWN	279693	138.255	-0.405727	-0.436449	0.193433	-2.0975	0.0359489	0.0736203	162.735	156.268	168.479	131.998	103.493	137.845	106.965
ENSMUSG00000000901.15	chr10	75923222	75932502	Mmp11	protein_coding	KNOWN	9281	60.119	-0.192458	-0.207415	0.25231	-0.762783	0.445593	0.560555	74.3623	68.3674	52.5719	52.3009	54.4136	70.8194	47.9973
ENSMUSG00000000902.13	chr10	75896769	75921617	Smarcb1	protein_coding	KNOWN	24849	2940.74	-0.394464	-0.40217	0.0859648	-4.58867	4.46074e-06	2.63165e-05	3404.5	3393.96	3448.22	2710.93	2703.61	2444.53	2479.4
ENSMUSG00000001119.7	chr10	76708792	76726168	Col6a1	protein_coding	KNOWN	17377	1611.78	-0.00401139	-0.00695852	0.283497	-0.0141497	0.988711	0.992536	1832.11	1245.26	1771.3	1663.67	2110.39	1568.14	1091.59
ENSMUSG00000001120.15	chr10	76761857	76961887	Pcbp3	protein_coding	KNOWN	200031	2725.79	0.0788931	0.0794333	0.0953411	0.827482	0.407964	0.524534	2632.86	2641.91	2646.4	2562.75	2875.38	2746.78	2974.46
ENSMUSG00000001150.6	chr10	76468971	76515856	Mcm3ap	protein_coding	KNOWN	46886	4162.01	-0.381786	-0.392503	0.0931091	-4.10041	4.12421e-05	0.000196145	5007.06	4580.62	4865.59	3476.77	3749.2	3946.91	3507.91
ENSMUSG00000001151.9	chr10	76351254	76442912	Pcnt	protein_coding	KNOWN	91659	2192.29	0.0434528	0.0441156	0.114087	0.380875	0.703296	0.784413	2150.04	2125.25	2186.91	1866.65	2163.74	2597.55	2255.87
ENSMUSG00000001211.14	chr10	78269178	78352489	Agpat3	protein_coding	KNOWN	83312	16702.5	0.124833	0.127663	0.0846315	1.47502	0.140208	0.226607	15888.7	15855.4	15847.3	16925.6	16568.4	16994.1	18838.2
ENSMUSG00000001435.14	chr10	77052178	77166548	Col18a1	protein_coding	KNOWN	114371	281.571	0.185674	0.163496	0.141732	1.31004	0.190184	0.289679	262.962	240.263	287.283	295.127	306.21	303.512	275.641
ENSMUSG00000001436.15	chr10	77032241	77061002	Slc19a1	protein_coding	KNOWN	28762	698.762	-0.530362	-0.534518	0.114725	-4.62289	3.78436e-06	2.26349e-05	867.56	841.896	837.425	637.573	594.282	531.145	581.453
ENSMUSG00000001663.10	chr10	75783813	75798584	Gstt1	protein_coding	KNOWN	14772	300.44	0.289461	0.314422	0.173312	1.67017	0.0948849	0.165522	245.719	279.33	266.171	281.429	281.67	325.01	423.747
ENSMUSG00000001665.10	chr10	75774115	75781414	Gstt3	protein_coding	KNOWN	7300	50.8466	0.429659	0.489786	0.267769	1.60459	0.108584	0.184678	42.0308	42.9738	38.9115	62.263	70.4176	41.7328	57.5967
ENSMUSG00000001666.8	chr10	75771230	75773414	Ddt	protein_coding	KNOWN	2185	147.151	0.236393	0.25241	0.179016	1.32052	0.186663	0.285308	125.015	139.665	133.293	143.205	149.371	169.461	170.047
ENSMUSG00000001783.3	chr10	85938637	85957823	Rtcb	protein_coding	KNOWN	19187	5419.35	0.00349614	0.00941272	0.0917272	0.0381146	0.969596	0.980848	5282.95	5580.74	5333.77	5609.9	5565.12	4897.92	5665.05
ENSMUSG00000001785.11	chr10	85871831	85889096	Pwp1	protein_coding	KNOWN	17266	1321.59	-0.267843	-0.256398	0.114427	-2.34073	0.0192459	0.0434764	1385.94	1560.73	1424.82	1500.54	1261.11	1016.76	1101.19
ENSMUSG00000001786.14	chr10	86021972	86051873	Fbxo7	protein_coding	KNOWN	29902	2317.66	-0.152129	-0.155482	0.10235	-1.48636	0.137184	0.222643	2494.91	2421.18	2467.98	2170.49	2389.93	2285.19	1993.94
ENSMUSG00000002147.18	chr10	127642986	127660957	Stat6	protein_coding	KNOWN	17972	470.958	0.516107	0.524238	0.146327	3.52707	0.000420179	0.0015624	396.599	346.721	386.631	478.18	628.424	551.379	508.771
ENSMUSG00000002578.15	chr10	128630843	128645991	Ikzf4	protein_coding	KNOWN	15149	1047.58	-1.052	-1.07192	0.12562	-8.37446	5.54779e-17	1.71037e-15	1488.32	1484.55	1514.24	870.437	745.786	622.199	607.508
ENSMUSG00000003068.15	chr10	80115803	80130682	Stk11	protein_coding	KNOWN	14880	3209.23	0.141498	0.156939	0.087348	1.61993	0.105247	0.179967	3032.69	3058.96	2942.79	3190.36	3150.65	3518.2	3571
ENSMUSG00000003070.6	chr10	80179482	80190010	Efna2	protein_coding	KNOWN	10529	311.063	-0.98572	-0.992629	0.14109	-6.98646	2.81905e-12	4.74998e-11	431.086	470.759	401.948	231.618	251.796	185.901	204.331
ENSMUSG00000003072.15	chr10	80138632	80145818	Atp5d	protein_coding	KNOWN	7187	9566.16	0.793161	0.820791	0.115473	6.86881	6.47408e-12	1.03592e-10	6782.05	6500.77	6675.39	9135.23	11152.7	12963.7	13753.3
ENSMUSG00000003226.6	chr10	58446852	58494155	Ranbp2	protein_coding	KNOWN	47304	84905.4	2.363	3.20065	0.357272	6.61403	3.74008e-11	5.33235e-10	14942.5	14894.3	14990.9	52195.1	79603.9	244552	173159
ENSMUSG00000003344.14	chr10	80642617	80657071	Btbd2	protein_coding	KNOWN	14455	4111.93	-0.247907	-0.250366	0.0879575	-2.81849	0.00482507	0.0133053	4588.91	4462.44	4519.94	3808.01	3753.47	3607.99	4042.74
ENSMUSG00000003345.15	chr10	80622780	80640771	Csnk1g2	protein_coding	KNOWN	17992	9711.51	0.436279	0.450573	0.101507	4.29801	1.72342e-05	8.98288e-05	7915.81	8223.63	7949.13	10476.4	10156.1	10708.9	12550.6
ENSMUSG00000003346.14	chr10	80583654	80590341	Abhd17a	protein_coding	KNOWN	6688	6543.48	0.394496	0.42104	0.117678	3.35233	0.00080134	0.00278422	5416.59	5724.31	5304.8	6612.33	6767.56	7119.88	8858.92
ENSMUSG00000003348.9	chr10	80685256	80701820	Mob3a	protein_coding	KNOWN	16565	202.656	1.2502	1.36178	0.190178	6.57382	4.90393e-11	6.81159e-10	117.471	101.574	101.418	170.601	232.591	345.244	349.694
ENSMUSG00000003746.15	chr10	53904788	54075796	Man1a	protein_coding	KNOWN	171009	1366.67	0.238062	0.248918	0.121581	1.95805	0.0502238	0.0977581	1197.34	1279.45	1224.88	1678.61	1465.97	1206.46	1513.97
ENSMUSG00000003923.14	chr10	71225464	71238280	Tfam	protein_coding	KNOWN	12817	2127.38	-0.347131	-0.344339	0.0961483	-3.61037	0.000305757	0.00117713	2376.36	2505.18	2381.88	1974.98	1820.19	1818.54	2014.51
ENSMUSG00000004207.14	chr10	60277627	60302597	Psap	protein_coding	KNOWN	24971	84902.1	0.167366	0.158398	0.0893974	1.87216	0.0611842	0.115478	81443.9	75904.5	81518	78544.8	91048.9	93821.7	92032.7
ENSMUSG00000004356.7	chr10	88746607	88826814	Utp20	protein_coding	KNOWN	80208	2381.61	-0.37493	-0.393898	0.119718	-3.13177	0.00173758	0.00550293	2805.29	2637.03	2832.26	2079.58	2170.14	2356.01	1790.98
ENSMUSG00000004360.8	chr10	29211643	29230779	9330159F19Rik	protein_coding	KNOWN	19137	8025.75	-0.382363	-0.388157	0.0919676	-4.15758	3.21639e-05	0.000157175	9500.05	9002.04	9326.34	7462.85	7374.64	7073.08	6441.23
ENSMUSG00000004665.10	chr10	79988584	79996062	Cnn2	protein_coding	KNOWN	7479	255.613	0.787241	0.784085	0.155171	5.07337	3.90835e-07	2.87024e-06	174.59	162.129	206.148	265.24	328.615	311.099	341.466
ENSMUSG00000004667.18	chr10	80035949	80039795	Polr2e	protein_coding	KNOWN	3847	2413.51	-0.341882	-0.3272	0.105808	-3.23114	0.00123297	0.00405665	2691.05	2906.59	2592.58	2135.62	2187.21	1981.68	2399.86
ENSMUSG00000004929.12	chr10	81070035	81082559	Thop1	protein_coding	KNOWN	12525	2397.84	-0.116601	-0.116495	0.0947664	-1.2304	0.218546	0.322454	2470.12	2531.55	2525.52	2582.67	2443.28	2082.85	2148.91
ENSMUSG00000004931.10	chr10	81268172	81273246	Apba3	protein_coding	KNOWN	5075	862.902	0.114487	0.12902	0.126278	0.906625	0.364605	0.481471	791.042	862.407	803.895	1023.6	958.106	704.4	896.863
ENSMUSG00000004933.17	chr10	81252935	81263365	Matk	protein_coding	KNOWN	10431	11807.6	0.175352	0.180747	0.0897233	1.95436	0.0506587	0.0984036	11119.9	10799.1	10993.7	10914.7	12039.3	13209.1	13577.7
ENSMUSG00000004934.13	chr10	81153266	81167923	Pias4	protein_coding	KNOWN	14658	1132.25	-0.0598747	-0.0594509	0.105567	-0.567175	0.570596	0.675148	1102.5	1201.31	1173.14	1297.56	1185.36	999.059	966.802
ENSMUSG00000004937.5	chr10	81044075	81060178	Sgta	protein_coding	KNOWN	16104	5922.28	0.0412158	0.0434739	0.079885	0.515939	0.605897	0.705129	5899.41	5764.35	5797.82	5787.97	6182.88	6034.82	5988.69
ENSMUSG00000005054.6	chr10	78425670	78427619	Cstb	protein_coding	KNOWN	1950	1313.1	1.20572	1.31492	0.185261	6.50823	7.60414e-11	1.02679e-09	697.281	709.068	722.761	1029.83	1476.64	2057.56	2498.6
ENSMUSG00000005357.8	chr10	78780496	78814825	Slc1a6	protein_coding	KNOWN	34330	430.163	0.104539	0.108656	0.136653	0.764999	0.444272	0.559482	428.93	396.531	409.813	381.05	471.584	435.033	488.201
ENSMUSG00000005682.8	chr10	128303335	128321358	Pan2	protein_coding	KNOWN	18024	1487.63	-0.180599	-0.191489	0.116326	-1.55252	0.120538	0.200712	1671.53	1504.08	1628.49	1306.28	1376.34	1638.96	1287.7
ENSMUSG00000005683.7	chr10	128337832	128362479	Cs	protein_coding	KNOWN	24648	15170.2	0.034051	0.0296556	0.0780465	0.436291	0.662626	0.750595	14915.6	14936.3	15125	14793.7	15745.8	15022.6	15652.6
ENSMUSG00000005897.14	chr10	94148023	94197211	Nr2c1	protein_coding	KNOWN	49189	469.137	-1.20642	-1.23295	0.136246	-8.85472	8.3893e-19	3.07325e-17	698.359	703.208	693.784	351.163	319.013	259.249	259.185
ENSMUSG00000006342.14	chr10	75636619	75644008	Susd2	protein_coding	KNOWN	7390	67.9546	0.20658	0.203894	0.23584	0.875933	0.381066	0.498062	51.7303	57.624	78.237	74.7156	87.4885	68.2901	57.5967
ENSMUSG00000006344.16	chr10	75589340	75617200	Ggt5	protein_coding	KNOWN	27861	108.786	-0.00472528	-0.00170998	0.211163	-0.0223774	0.982147	0.988368	121.782	102.551	102.246	84.6777	123.764	111.288	115.193
ENSMUSG00000006345.10	chr10	75561604	75586200	Ggt1	protein_coding	KNOWN	24597	85.7442	0.450779	0.5036	0.232052	1.94257	0.0520675	0.100613	68.9737	76.1809	62.5068	73.4704	101.359	117.611	100.109
ENSMUSG00000006498.16	chr10	79854427	79864771	Ptbp1	protein_coding	KNOWN	10345	3021.73	1.40497	1.49097	0.148883	9.43674	3.84549e-21	1.71058e-19	1504.49	1481.62	1469.12	2893.99	3518.75	4708.22	5575.91
ENSMUSG00000006724.12	chr10	127048250	127053006	Cyp27b1	protein_coding	KNOWN	4757	86.9411	0.435676	0.466652	0.246176	1.76978	0.0767644	0.138761	87.2948	49.8106	76.9951	95.885	108.827	107.494	82.281
ENSMUSG00000006728.12	chr10	127063534	127067920	Cdk4	protein_coding	KNOWN	4387	2132.73	-0.354307	-0.359304	0.0916065	-3.8677	0.000109865	0.000474213	2367.74	2509.09	2443.56	2043.47	1872.47	1904.54	1788.24
ENSMUSG00000006731.9	chr10	127165156	127172340	B4galnt1	protein_coding	KNOWN	7185	5469.78	-0.27169	-0.276119	0.0973202	-2.79171	0.00524301	0.0142832	6194.7	5926.48	6102.07	5226.36	5253.58	4457.83	5127.48
ENSMUSG00000006732.14	chr10	127041414	127046365	Mettl1	protein_coding	KNOWN	4952	620.714	-0.227846	-0.224918	0.120849	-1.88537	0.0593795	0.112508	675.727	680.744	673.086	643.8	647.628	508.382	515.628
ENSMUSG00000006736.8	chr10	127067317	127070261	Tspan31	protein_coding	KNOWN	2945	2522.23	1.07613	1.09512	0.112665	9.55162	1.27687e-21	5.85824e-20	1572.38	1438.65	1576.74	2570.22	3107.98	3597.88	3791.78
ENSMUSG00000006764.8	chr10	115078641	115185022	Tph2	protein_coding	KNOWN	106382	67.4149	0.24845	0.271668	0.241597	1.02837	0.303776	0.418354	62.5074	56.6473	61.6789	72.2251	85.3546	59.4377	74.0529
ENSMUSG00000008398.14	chr10	93247414	93311135	Elk3	protein_coding	KNOWN	63722	674.155	0.190276	0.19126	0.113352	1.67863	0.0932242	0.163171	655.25	588.937	626.724	684.893	687.105	789.13	687.047
ENSMUSG00000009092.4	chr10	75893398	75895941	Derl3	protein_coding	KNOWN	2544	69.3043	-0.250633	-0.266643	0.24862	-1.0081	0.313408	0.428623	85.1394	82.0409	62.9207	65.9988	53.3467	82.201	53.4827
ENSMUSG00000009291.12	chr10	77581720	77598732	Pttg1ip	protein_coding	KNOWN	17013	6171.2	1.03789	1.07292	0.111227	9.33129	1.04592e-20	4.53591e-19	3846.36	3727.98	3778.97	6408.11	7214.6	9459.44	8762.93
ENSMUSG00000009292.17	chr10	77907722	77970563	Trpm2	protein_coding	KNOWN	62842	1666.34	0.0926183	0.0681571	0.0967826	0.956973	0.338581	0.454914	1673.69	1484.55	1706.31	1555.33	1744.44	1766.69	1733.39
ENSMUSG00000009293.17	chr10	77622275	77645993	Ube2g2	protein_coding	KNOWN	23719	3158.56	-0.102316	-0.100148	0.090953	-1.12494	0.260616	0.370686	3308.58	3280.66	3264.01	3216.51	3053.56	2836.57	3149.99
ENSMUSG00000009647.13	chr10	59446984	59616692	Mcu	protein_coding	KNOWN	169709	3245.94	0.108314	0.112638	0.0813882	1.33083	0.183244	0.280937	3152.31	3072.63	3081.05	3313.64	3405.65	3396.8	3299.47
ENSMUSG00000009681.9	chr10	75060896	75184923	Bcr	protein_coding	KNOWN	124028	8147.42	-0.0214439	-0.00816463	0.0850161	-0.252233	0.800861	0.859226	7979.39	8592.81	7949.13	8284.72	7775.81	8035.47	8414.61
ENSMUSG00000010461.14	chr10	23104168	23349895	Eya4	protein_coding	KNOWN	245728	244.179	0.218678	0.222152	0.15635	1.39864	0.16192	0.254254	201.533	239.286	228.088	251.543	254.997	288.336	245.472
ENSMUSG00000012819.15	chr10	60302748	60696490	Cdh23	protein_coding	KNOWN	393743	323.935	0.0332388	0.0267147	0.169167	0.196486	0.84423	0.892195	377.2	259.796	324.539	362.371	329.682	313.629	300.326
ENSMUSG00000013833.15	chr10	79894708	79908923	Med16	protein_coding	KNOWN	14216	3482.92	0.0869258	0.0894589	0.0834735	1.04136	0.29771	0.411601	3353.85	3370.52	3355.91	3418.24	3500.61	3615.58	3765.73
ENSMUSG00000013858.14	chr10	79974948	79984330	Tmem259	protein_coding	KNOWN	9383	5557.76	0.0804718	0.080604	0.084542	0.951856	0.34117	0.457469	5328.22	5416.66	5398.35	5475.41	5569.39	5628.87	6087.42
ENSMUSG00000014329.14	chr10	70922832	71159700	Bicc1	protein_coding	KNOWN	236869	329.164	0.255339	0.262486	0.132999	1.91985	0.0548766	0.105322	301.76	289.097	295.562	372.333	356.356	333.863	355.18
ENSMUSG00000014498.9	chr10	128377115	128408704	Ankrd52	protein_coding	KNOWN	31590	5759.92	0.365198	0.369189	0.0831902	4.38991	1.13395e-05	6.15402e-05	5040.47	4832.6	4938.45	6569.99	6493.35	6391.45	6053.14
ENSMUSG00000015202.13	chr10	7119063	7212237	Cnksr3	protein_coding	KNOWN	93175	269.794	0.25698	0.27295	0.147183	1.74599	0.0808133	0.144835	271.584	220.729	230.985	278.938	295.54	279.484	311.297
ENSMUSG00000015305.5	chr10	8722219	8886070	Sash1	protein_coding	KNOWN	163852	7154.3	0.423212	0.417661	0.0927529	4.56279	5.04775e-06	2.94891e-05	6173.15	5653.99	6180.72	7792.84	6988.41	9056.03	8234.96
ENSMUSG00000015312.8	chr10	80930091	80932204	Gadd45b	protein_coding	KNOWN	2114	13093	4.63894	5.44298	0.28482	16.2873	1.2152e-59	3.63834e-57	530.235	509.826	513.301	11458.9	18627.6	27066.9	32944
ENSMUSG00000015501.10	chr10	13966075	14151374	Hivep2	protein_coding	KNOWN	185300	18703.8	0.342235	0.334844	0.0945165	3.62091	0.000293574	0.00113811	16831.7	15219.6	16771.7	21912.8	21388.8	19377.9	19423.8
ENSMUSG00000015755.16	chr10	7905653	7956230	Tab2	protein_coding	KNOWN	50578	5397.13	-0.00256903	0.00741468	0.0877015	-0.0292929	0.976631	0.985174	5248.47	5599.29	5296.11	6053.21	5479.77	4952.3	5150.79
ENSMUSG00000015757.10	chr10	7792891	7823135	Ppil4	protein_coding	KNOWN	30245	3958.52	0.12348	0.135041	0.0962677	1.28267	0.199607	0.300812	3773.08	3759.23	3712.74	4562.63	4390.43	3876.1	3635.45
ENSMUSG00000015889.7	chr10	93453396	93484896	Lta4h	protein_coding	KNOWN	31501	2369.07	0.0311582	0.0469515	0.0934061	0.333578	0.738698	0.811458	2283.68	2442.67	2249	2276.34	2415.54	2535.59	2380.66
ENSMUSG00000018166.8	chr10	128567523	128589652	Erbb3	protein_coding	KNOWN	22130	368.767	0.159422	0.162564	0.160795	0.991462	0.32146	0.436886	351.335	335.001	349.376	413.426	368.092	451.473	312.668
ENSMUSG00000019467.13	chr10	127182521	127190054	Arhgef25	protein_coding	KNOWN	7534	18419.2	0.0658463	0.0422872	0.0783042	0.840904	0.400401	0.516989	18993.6	16474.6	18865.9	17413.7	18451.5	19355.2	19379.9
ENSMUSG00000019564.12	chr10	79927043	79955018	Arid3a	protein_coding	KNOWN	27976	390.89	-0.787663	-0.811729	0.166126	-4.74136	2.1229e-06	1.34246e-05	529.158	508.849	517.026	391.012	291.273	263.043	235.872
ENSMUSG00000019762.4	chr10	3540240	3554877	Iyd	protein_coding	KNOWN	14638	440.232	0.47424	0.477993	0.133033	3.56483	0.000364085	0.00137818	353.49	349.651	375.455	493.123	439.576	495.736	574.596
ENSMUSG00000019763.11	chr10	4401915	4432388	Rmnd1	protein_coding	KNOWN	30474	1056.12	-0.54864	-0.576272	0.10186	-5.38622	7.19551e-08	6.06863e-07	1315.89	1231.59	1355.28	907.795	881.287	871.331	829.667
ENSMUSG00000019768.16	chr10	4611593	5005614	Esr1	protein_coding	KNOWN	394022	124.124	-0.0231078	-0.0199769	0.19779	-0.11683	0.906995	0.937588	122.859	132.828	119.632	113.319	153.638	110.023	116.565
ENSMUSG00000019772.4	chr10	5639218	5647614	Vip	protein_coding	KNOWN	8397	481.751	0.186894	0.195353	0.129061	1.4481	0.147588	0.236278	403.065	493.222	438.375	521.764	556.939	435.033	523.856
ENSMUSG00000019773.7	chr10	5799160	5805600	Fbxo5	protein_coding	KNOWN	6441	106.187	-0.574151	-0.611103	0.212071	-2.70735	0.0067822	0.0178788	131.481	141.618	123.772	95.885	93.8901	93.5827	63.0821
ENSMUSG00000019774.8	chr10	5811887	5823910	Mtrf1l	protein_coding	KNOWN	12024	373.309	-0.441998	-0.443129	0.144605	-3.0566	0.00223863	0.00688391	417.075	482.479	419.748	387.276	299.808	317.423	289.355
ENSMUSG00000019775.17	chr10	5825663	5922400	Rgs17	protein_coding	KNOWN	96738	4308.42	-0.493878	-0.490096	0.101477	-4.8669	1.13363e-06	7.55869e-06	4994.13	5443.03	5034.49	4263.77	3511.28	3470.15	3442.09
ENSMUSG00000019777.16	chr10	36974544	37001889	Hdac2	protein_coding	KNOWN	27346	6232.92	-0.229972	-0.228372	0.102922	-2.23443	0.0254551	0.0550278	6695.84	6953.95	6756.11	6547.58	5785.98	5024.38	5866.64
ENSMUSG00000019782.9	chr10	33996555	34019624	Rwdd1	protein_coding	KNOWN	23070	1864.2	0.102372	0.109999	0.13221	0.774316	0.438744	0.554314	1763.14	1828.34	1758.88	1921.44	1892.74	1611.14	2273.7
ENSMUSG00000019785.13	chr10	33512286	33624769	Clvs2	protein_coding	KNOWN	112484	2945.97	-0.598509	-0.595788	0.103679	-5.77271	7.80066e-09	7.64789e-08	3695.48	3675.24	3585.24	2740.82	2489.15	2101.82	2334.04
ENSMUSG00000019789.8	chr10	30832359	30842801	Hey2	protein_coding	KNOWN	10443	364.686	-0.00893706	0.00726353	0.133127	-0.0671321	0.946477	0.964504	358.879	389.694	342.339	347.428	394.765	376.86	342.838
ENSMUSG00000019790.16	chr10	9755547	9901079	Stxbp5	protein_coding	KNOWN	145533	12779.4	-0.332826	-0.339633	0.0865589	-3.84508	0.000120514	0.000515886	14551.3	14374.7	14633.2	11909.7	11790.7	11706.7	10489.5
ENSMUSG00000019791.11	chr10	30608141	30618479	Hint3	protein_coding	KNOWN	10339	532.827	-0.117478	-0.120201	0.132423	-0.887137	0.375005	0.491991	551.79	563.543	559.663	581.537	470.517	467.914	534.827
ENSMUSG00000019792.7	chr10	30534225	30600749	Trmt11	protein_coding	KNOWN	66525	474.584	-0.143619	-0.147016	0.12839	-1.11861	0.263305	0.373658	542.09	465.875	499.226	485.652	439.576	459.061	430.604
ENSMUSG00000019794.13	chr10	7726000	7763150	Katna1	protein_coding	KNOWN	37151	810.672	0.551541	0.597231	0.151956	3.62961	0.000283852	0.00110676	626.152	638.747	615.961	691.119	854.613	1034.47	1213.65
ENSMUSG00000019795.17	chr10	7629373	7681136	Pcmt1	protein_coding	KNOWN	51764	7655.76	-0.00538194	-0.0047396	0.0939757	-0.0572694	0.954331	0.970538	7666.86	7655.2	7688.34	8205.02	7827.02	6786.01	7761.84
ENSMUSG00000019796.12	chr10	7589800	7625483	Lrp11	protein_coding	KNOWN	35684	14987.9	0.0976112	0.0986207	0.0852114	1.14552	0.251994	0.361195	14473.7	14322	14420.9	15042.7	15049.1	14884.7	16722.2
ENSMUSG00000019797.10	chr10	43525121	43540994	1700021F05Rik	protein_coding	KNOWN	15874	869.175	-0.154431	-0.15308	0.115894	-1.33251	0.182692	0.280285	948.388	906.357	911.937	872.927	804.467	747.397	892.749
ENSMUSG00000019802.13	chr10	42761496	42832514	Sec63	protein_coding	KNOWN	71019	7149.19	0.258323	0.259115	0.0775322	3.33182	0.0008628	0.00296926	6505.08	6328.87	6446.06	7913.63	7659.51	7580.2	7611
ENSMUSG00000019803.11	chr10	42561963	42583632	Nr2e1	protein_coding	KNOWN	21670	1382.22	0.755944	0.787038	0.12563	6.01724	1.7742e-09	1.91557e-08	913.901	1047.98	969.476	1517.97	1477.7	1877.98	1870.52
ENSMUSG00000019804.12	chr10	42502030	42535381	Snx3	protein_coding	KNOWN	33352	7432.63	0.446033	0.443732	0.0805807	5.53524	3.10801e-08	2.76664e-07	6277.68	5972.39	6242.4	7958.46	8424.5	8335.19	8817.78
ENSMUSG00000019806.13	chr10	13647054	13868980	Aig1	protein_coding	KNOWN	221927	1926.74	0.092898	0.0895097	0.105778	0.878235	0.379816	0.496754	1912.94	1784.39	1878.93	1931.4	2033.57	1797.04	2148.91
ENSMUSG00000019808.8	chr10	13552894	13563376	Adat2	protein_coding	KNOWN	10483	406.867	-0.484402	-0.512388	0.125938	-3.84635	0.000119892	0.000513507	486.049	472.712	513.301	364.861	358.489	326.275	326.381
ENSMUSG00000019809.16	chr10	13523842	13553142	Pex3	protein_coding	KNOWN	29301	1438.9	-0.145138	-0.137488	0.104602	-1.38753	0.16528	0.258566	1538.98	1520.69	1493.54	1512.99	1446.76	1214.05	1345.29
ENSMUSG00000019810.15	chr10	13499540	13519035	Fuca2	protein_coding	KNOWN	19496	2447.94	-0.0235747	-0.026633	0.0889751	-0.264958	0.791042	0.851828	2518.62	2415.32	2487.44	2356.03	2435.81	2349.69	2572.65
ENSMUSG00000019813.15	chr10	41718840	41809871	Cep57l1	protein_coding	KNOWN	91032	318.34	-0.521599	-0.54304	0.138886	-3.7556	0.000172924	0.000709981	382.588	387.741	393.255	244.071	287.005	273.16	260.557
ENSMUSG00000019814.4	chr10	13178640	13193137	Ltv1	protein_coding	KNOWN	14498	1091.64	0.193968	0.190491	0.104165	1.86212	0.0625868	0.117583	1017.36	981.561	1031.57	1235.3	1221.64	1092.64	1061.43
ENSMUSG00000019817.18	chr10	13060504	13131694	Plagl1	protein_coding	KNOWN	71191	2629.44	1.44768	1.49883	0.15811	9.15614	5.37871e-20	2.21537e-18	1449.53	1045.05	1365.63	2571.46	3320.3	5238.1	3416.03
ENSMUSG00000019818.15	chr10	41519414	41531048	Cd164	protein_coding	KNOWN	11635	4643.24	0.156219	0.144883	0.0837615	1.86505	0.0621751	0.116923	4351.81	4285.66	4499.25	5150.4	4890.82	4652.58	4672.19
ENSMUSG00000019820.9	chr10	12382188	12861735	Utrn	protein_coding	KNOWN	479548	3246.83	0.18654	0.193266	0.0953738	1.95588	0.0504795	0.0981631	2998.2	3024.77	2980.04	3329.83	3298.96	3795.16	3300.84
ENSMUSG00000019822.12	chr10	41485642	41490369	Smpd2	protein_coding	KNOWN	4728	981.936	-0.103744	-0.110246	0.106154	-0.97729	0.328426	0.444477	1022.75	1007.93	1044.4	845.532	920.763	1042.06	990.115
ENSMUSG00000019823.17	chr10	41476314	41487032	Mical1	protein_coding	KNOWN	10719	457.081	0.191334	0.201897	0.140817	1.35875	0.174227	0.269583	456.951	393.601	412.296	486.897	440.643	570.349	438.832
ENSMUSG00000019826.10	chr10	41450396	41465571	Zbtb24	protein_coding	KNOWN	15176	776.48	-0.472521	-0.470683	0.114052	-4.14304	3.42733e-05	0.000166231	913.901	951.284	904.9	769.571	675.369	603.229	617.108
ENSMUSG00000019828.13	chr10	10686059	11082356	Grm1	protein_coding	KNOWN	396298	7896.28	-0.239813	-0.264942	0.103524	-2.31649	0.0205313	0.0459269	9105.61	7973.6	9121.44	6880.06	7315.96	8163.2	6714.13
ENSMUSG00000019831.14	chr10	40883475	40938570	Wasf1	protein_coding	KNOWN	55096	24257.6	-0.350357	-0.36159	0.1104	-3.17354	0.00150593	0.00485114	28193	26673.1	28462.9	23928.9	22910.3	18037.4	21597.4
ENSMUSG00000019832.3	chr10	10545011	10558233	Rab32	protein_coding	KNOWN	13223	182.533	-1.0222	-1.07342	0.177761	-5.75044	8.90109e-09	8.66673e-08	275.895	250.03	256.236	133.243	121.63	137.845	102.851
ENSMUSG00000019837.7	chr10	40249203	40257665	Gtf3c6	protein_coding	KNOWN	8463	722.518	0.0213445	0.0240553	0.108023	0.197593	0.843364	0.891764	701.592	732.508	712.826	763.345	751.121	663.932	732.301
ENSMUSG00000019838.10	chr10	40033535	40142254	Slc16a10	protein_coding	KNOWN	108720	1683.1	1.97502	2.07664	0.16861	11.7136	1.08629e-31	9.89031e-30	589.51	615.307	573.738	2573.95	2840.18	2887.15	1701.85
ENSMUSG00000019841.15	chr10	39732118	39875211	Rev3l	protein_coding	KNOWN	143094	7193.13	0.213722	0.21817	0.098816	2.16282	0.0305548	0.0639565	6431.8	6745.91	6560.32	8034.42	7611.5	8161.93	6806.01
ENSMUSG00000019842.6	chr10	39612934	39655307	Traf3ip2	protein_coding	KNOWN	42374	821.586	0.0937587	0.109998	0.154956	0.605066	0.545135	0.653013	715.602	884.87	757.533	773.307	780.995	1058.5	780.298
ENSMUSG00000019843.14	chr10	39368855	39565381	Fyn	protein_coding	KNOWN	196527	9170.56	0.0218578	0.0191736	0.0796594	0.274391	0.783784	0.846158	9213.38	8931.72	9157.87	8769.12	9171.36	9183.75	9766.76
ENSMUSG00000019845.7	chr10	39134023	39151058	Tube1	protein_coding	KNOWN	17036	133.769	-0.527225	-0.56367	0.182062	-2.89586	0.00378121	0.0108057	156.269	165.059	170.962	110.828	114.162	101.171	117.936
ENSMUSG00000019846.11	chr10	38965515	39110188	Lama4	protein_coding	KNOWN	144674	225.029	0.220725	0.231048	0.18212	1.21198	0.225521	0.330984	218.776	190.452	204.906	261.505	217.654	285.807	196.103
ENSMUSG00000019848.14	chr10	45178098	45318452	Popdc3	protein_coding	KNOWN	140355	340.872	-0.118769	-0.132541	0.169124	-0.702261	0.482516	0.595411	367.5	326.21	382.906	366.107	375.56	242.809	325.01
ENSMUSG00000019849.10	chr10	45067206	45158997	Prep	protein_coding	KNOWN	91792	1229.1	-0.263338	-0.280553	0.112132	-2.34847	0.0188508	0.0426642	1388.1	1306.79	1406.61	1049.75	1253.65	1066.08	1132.74
ENSMUSG00000019850.11	chr10	19000910	19015657	Tnfaip3	protein_coding	KNOWN	14748	285.57	-0.010972	-0.00552271	0.175806	-0.0624094	0.950237	0.967449	276.972	288.12	293.492	391.012	273.135	239.015	237.244
ENSMUSG00000019851.7	chr10	18845071	18857073	Perp	protein_coding	KNOWN	12003	107.812	-0.133929	-0.147939	0.215063	-0.622742	0.533454	0.642282	113.16	114.271	115.079	85.923	126.965	92.3181	106.965
ENSMUSG00000019852.6	chr10	18588011	18743758	Arfgef3	protein_coding	KNOWN	155748	9589.74	0.279976	0.295282	0.110281	2.53876	0.0111248	0.0272629	8270.38	8845.77	8348.18	10039.3	9430.62	12122.8	10071.2
ENSMUSG00000019853.5	chr10	18540123	18546076	Hebp2	protein_coding	KNOWN	5954	85.2676	-0.255816	-0.290748	0.229494	-1.1147	0.264981	0.375522	88.3725	90.831	106.386	83.4324	88.5554	55.6438	83.6524
ENSMUSG00000019854.16	chr10	18055861	18125155	Reps1	protein_coding	KNOWN	69295	3108.53	-0.103876	-0.105984	0.0867231	-1.19779	0.230999	0.337281	3323.67	3147.83	3247.46	3063.34	3120.78	2897.27	2959.37
ENSMUSG00000019856.13	chr10	53633145	53750909	Fam184a	protein_coding	KNOWN	117765	2125.93	0.0552209	0.0699325	0.109886	0.502528	0.615296	0.713241	2017.48	2166.27	2018.02	1970	2055.98	2477.41	2176.33
ENSMUSG00000019857.6	chr10	53596961	53609213	Asf1a	protein_coding	KNOWN	12253	732.144	-0.445147	-0.437217	0.146526	-3.03802	0.00238138	0.00726122	808.285	973.748	800.17	645.045	532.4	623.463	741.901
ENSMUSG00000019861.14	chr10	52337024	52382124	Gopc	protein_coding	KNOWN	45101	3611.11	-0.274098	-0.265815	0.101343	-2.70465	0.00683768	0.0180007	3939.04	4130.37	3916.4	3796.8	3386.45	2868.18	3240.5
ENSMUSG00000019863.6	chr10	43874188	43901745	Qrsl1	protein_coding	KNOWN	27558	761.113	-0.488035	-0.495642	0.11582	-4.21373	2.51193e-05	0.00012579	906.357	917.101	914.835	681.157	725.514	560.232	622.593
ENSMUSG00000019864.13	chr10	43901807	43947862	Rtn4ip1	protein_coding	KNOWN	46056	690.679	-0.48484	-0.506976	0.114766	-4.2246	2.39364e-05	0.000120526	899.891	744.229	850.258	520.519	593.215	625.993	600.652
ENSMUSG00000019865.9	chr10	14705591	14770850	Nmbr	protein_coding	KNOWN	65260	82.6361	-0.186907	-0.193074	0.279992	-0.667542	0.504426	0.616445	76.5177	120.131	70.3719	75.9609	48.012	102.435	85.0237
ENSMUSG00000019866.13	chr10	43950307	44148853	Aim1	protein_coding	KNOWN	198547	87.8897	-0.286268	-0.311852	0.231096	-1.23874	0.215443	0.319056	102.383	95.7144	98.5206	64.7535	78.953	104.964	69.9389
ENSMUSG00000019868.16	chr10	14654755	14705560	Vta1	protein_coding	KNOWN	50806	1239.87	-0.0493368	-0.0588292	0.101818	-0.48456	0.627988	0.723429	1271.7	1240.38	1294.43	1222.85	1247.24	1122.99	1279.47
ENSMUSG00000019872.13	chr10	57794335	57811830	Smpdl3a	protein_coding	KNOWN	17496	1537.07	0.348555	0.33861	0.10831	3.21813	0.0012903	0.00422297	1328.82	1284.33	1392.54	1656.2	1573.73	1598.49	1925.38
ENSMUSG00000019873.7	chr10	67009189	67096988	Reep3	protein_coding	KNOWN	87800	2837.64	0.476984	0.479465	0.103192	4.62228	3.79544e-06	2.26838e-05	2303.07	2300.08	2344.63	3333.56	3096.24	3533.38	2952.52
ENSMUSG00000019874.11	chr10	57784881	57788450	Fabp7	protein_coding	KNOWN	3570	2697.99	0.293856	0.287798	0.152076	1.9323	0.0533221	0.102744	2563.88	2067.63	2555.74	3565.18	2712.14	2383.83	3037.54
ENSMUSG00000019876.15	chr10	57631981	57741112	Pkib	protein_coding	KNOWN	109132	598.272	-0.00487167	-0.00292651	0.119141	-0.0408901	0.967383	0.979457	564.722	634.841	597.333	589.008	577.211	582.995	641.792
ENSMUSG00000019877.10	chr10	57515774	57532530	Serinc1	protein_coding	KNOWN	16757	65500.7	0.1675	0.17031	0.0823848	2.03315	0.0420377	0.0841997	60810	61550.2	61012.4	66683.7	69040.2	66223.7	73184.9
ENSMUSG00000019878.7	chr10	57486385	57513133	Hsf2	protein_coding	KNOWN	26749	2248.53	0.256004	0.256618	0.101664	2.51813	0.0117978	0.0286196	1985.15	2023.68	2061.48	2781.91	2466.75	2248.51	2172.22
ENSMUSG00000019880.9	chr10	29453109	29535867	Rspo3	protein_coding	KNOWN	82759	556.161	-0.476291	-0.505316	0.131461	-3.62305	0.000291153	0.0011307	613.219	690.511	703.719	417.162	475.852	522.293	470.373
ENSMUSG00000019883.10	chr10	29313166	29346661	Echdc1	protein_coding	KNOWN	33496	468.94	0.031085	0.0355766	0.117205	0.265219	0.790841	0.85167	458.028	470.759	458.245	476.935	461.982	478.031	478.601
ENSMUSG00000019888.15	chr10	101681487	102391469	Mgat4c	protein_coding	KNOWN	709983	743.843	0.380765	0.375605	0.133189	2.85883	0.00425201	0.0119128	660.639	581.123	665.635	856.739	823.672	704.4	914.691
ENSMUSG00000019889.9	chr10	28074820	28597397	Ptprk	protein_coding	KNOWN	522578	6291.97	0.0359635	0.0384853	0.0902653	0.39842	0.690321	0.773543	6300.32	6118.89	6169.54	6286.07	6223.42	6922.59	6022.97
ENSMUSG00000019891.13	chr10	52233619	52321378	Dcbld1	protein_coding	KNOWN	87760	702.129	-0.439799	-0.453907	0.112688	-3.90282	9.5078e-05	0.000417919	869.715	781.342	839.495	637.573	577.211	617.14	592.423
ENSMUSG00000019892.12	chr10	103063198	103236322	Lrriq1	protein_coding	KNOWN	173125	220.733	0.140346	0.154053	0.179953	0.779907	0.435445	0.551273	201.533	214.869	205.734	244.071	182.446	275.69	220.787
ENSMUSG00000019894.13	chr10	103367808	103419378	Slc6a15	protein_coding	KNOWN	51571	7474.13	-0.145867	-0.128104	0.0961935	-1.5164	0.129419	0.212635	7549.39	8482.45	7534.76	6809.08	6890.25	7414.53	7638.42
ENSMUSG00000019897.8	chr10	105841067	105847833	Ccdc59	protein_coding	KNOWN	6767	1624.78	0.240139	0.249885	0.0959151	2.50366	0.0122916	0.0296555	1421.5	1526.55	1450.9	1895.29	1821.25	1711.05	1546.88
ENSMUSG00000019899.15	chr10	26980036	27619758	Lama2	protein_coding	KNOWN	639723	1305.93	0.174166	0.180091	0.106522	1.63503	0.102043	0.175723	1205.96	1227.68	1207.5	1271.41	1382.75	1520.09	1326.1
ENSMUSG00000019906.14	chr10	107271843	107425143	Lin7a	protein_coding	KNOWN	153301	3425.41	0.223658	0.223559	0.0805166	2.77778	0.00547309	0.0148399	3058.55	3180.06	3139.41	3656.08	3640.38	3693.99	3609.39
ENSMUSG00000019907.9	chr10	108162400	108277575	Ppp1r12a	protein_coding	KNOWN	115176	6610.37	0.2785	0.285144	0.0886239	3.14249	0.00167515	0.00532471	5887.55	5861.04	5881.02	6862.63	6494.42	7448.68	7837.27
ENSMUSG00000019916.14	chr10	59323296	59373304	P4ha1	protein_coding	KNOWN	50009	9940.84	1.57594	1.58141	0.0899138	17.5272	8.88693e-69	3.84335e-66	4662.19	4494.67	4787.77	13502.4	15164.3	13584.7	13389.9
ENSMUSG00000019917.9	chr10	59164113	59221847	Sept10	protein_coding	KNOWN	57735	292.28	0.181668	0.174925	0.15854	1.14588	0.251844	0.361109	232.786	294.957	288.939	328.749	267.8	318.687	314.039
ENSMUSG00000019920.17	chr10	58323466	58424691	Lims1	protein_coding	KNOWN	101226	2426.5	0.358162	0.376379	0.0864965	4.14077	3.46141e-05	0.000167675	2054.12	2151.62	2014.29	2719.65	2597.98	2720.22	2727.62
ENSMUSG00000019923.13	chr10	72654845	72674964	Zwint	protein_coding	KNOWN	20120	58403.2	0.691882	0.731543	0.128646	5.37818	7.52442e-08	6.32547e-07	40523.1	45741.7	40940.3	55612.1	68612.3	78581.7	78811.5
ENSMUSG00000019927.6	chr10	71254980	71285262	Ube2d1	protein_coding	KNOWN	30283	2931.78	-0.166174	-0.158439	0.0844881	-1.96683	0.0492027	0.0961996	3102.74	3185.92	3062.42	2732.1	2714.28	2816.33	2908.63
ENSMUSG00000019929.15	chr10	97479500	97518162	Dcn	protein_coding	KNOWN	38663	1383.24	-0.585489	-0.639853	0.29707	-1.97088	0.0487377	0.0954221	1692.01	1810.76	1715	1326.2	1881	615.876	641.792
ENSMUSG00000019935.16	chr10	89574020	89621253	Slc17a8	protein_coding	KNOWN	47234	223.852	0.0504573	0.0537064	0.153067	0.329642	0.74167	0.813976	209.077	230.496	217.739	225.392	247.528	203.606	233.13
ENSMUSG00000019936.10	chr10	97644068	97682454	Epyc	protein_coding	KNOWN	38387	103.581	0.0612138	0.0619691	0.212671	0.287834	0.773474	0.838419	101.305	96.6911	105.144	110.828	110.961	82.201	117.936
ENSMUSG00000019943.9	chr10	98915152	99026143	Atp2b1	protein_coding	KNOWN	110992	62069.7	0.129109	0.117349	0.0821034	1.57252	0.115831	0.194538	60517.9	56453	60637.8	64441	62618.3	68063.7	61756
ENSMUSG00000019944.14	chr10	69151434	69291791	Rhobtb1	protein_coding	KNOWN	140358	364.581	0.461052	0.433663	0.145863	3.16087	0.00157301	0.00503394	303.915	260.773	346.478	400.974	449.179	428.71	362.037
ENSMUSG00000019945.9	chr10	68430953	68541896	1700040L02Rik	protein_coding	KNOWN	110944	63.7947	0.124383	0.145073	0.249741	0.49805	0.618449	0.715777	66.8183	58.6007	55.0557	78.4514	76.8192	51.8499	58.9681
ENSMUSG00000019947.9	chr10	68095593	68278726	Arid5b	protein_coding	KNOWN	183134	4400.31	1.95705	2.03872	0.137065	14.2782	2.99126e-46	5.29214e-44	1642.44	1467.95	1644.22	4626.14	5240.77	8904.27	7276.39
ENSMUSG00000019948.3	chr10	89711973	89732295	Actr6	protein_coding	KNOWN	20323	972.847	-0.390638	-0.396812	0.125982	-3.10074	0.00193039	0.00604038	1106.81	1140.76	1135.89	1007.42	881.287	693.018	844.752
ENSMUSG00000019951.9	chr10	89744991	89819869	Uhrf1bp1l	protein_coding	KNOWN	74879	6294.19	0.108997	0.0940634	0.0952622	1.14418	0.252549	0.361824	6192.54	5687.2	6302.84	7003.34	6642.72	6130.93	6099.77
ENSMUSG00000019952.14	chr10	99107036	99198074	Poc1b	protein_coding	KNOWN	91039	455.76	0.161926	0.155168	0.118651	1.36473	0.172339	0.267299	419.231	423.878	440.859	485.652	459.848	476.766	484.087
ENSMUSG00000019960.7	chr10	99263231	99267488	Dusp6	protein_coding	KNOWN	4258	9611.1	2.13113	2.97151	0.369074	5.77425	7.7295e-09	7.5829e-08	2039.03	1757.04	2075.56	5049.53	11062	17450.6	27843.9
ENSMUSG00000019961.16	chr10	91147571	91171582	Tmpo	protein_coding	KNOWN	24012	1564.93	-0.0140605	-0.00553664	0.115499	-0.121737	0.903107	0.934748	1544.36	1629.1	1531.62	1654.95	1458.5	1726.22	1409.75
ENSMUSG00000019966.17	chr10	100015630	100100413	Kitl	protein_coding	KNOWN	84784	16149.7	2.22693	2.94298	0.352363	6.31999	2.61574e-10	3.22187e-09	3357.08	3421.3	3267.33	11442.7	24036.9	42385.4	25136.9
ENSMUSG00000019970.15	chr10	21882184	21999903	Sgk1	protein_coding	KNOWN	117720	23960.5	2.47196	2.90881	0.287148	8.60864	7.39307e-18	2.51866e-16	5218.29	4841.39	5169.44	18845.8	31535.3	46060.4	56052.6
ENSMUSG00000019971.9	chr10	100488289	100573655	Cep290	protein_coding	KNOWN	85367	1437.18	0.0234213	0.0398782	0.114718	0.204164	0.838225	0.88808	1441.98	1421.07	1380.53	1380.99	1240.84	1711.05	1483.8
ENSMUSG00000019975.12	chr10	91082940	91102607	Ikbip	protein_coding	KNOWN	19668	762.017	-0.110475	-0.12978	0.10365	-1.06585	0.286492	0.399783	756.555	813.573	834.114	763.345	734.05	705.664	726.816
ENSMUSG00000019977.15	chr10	21295979	21368889	Hbs1l	protein_coding	KNOWN	72911	3749.8	0.24157	0.238747	0.0826998	2.92104	0.00348862	0.0100619	3450.84	3315.82	3433.73	4035.89	4025.54	4111.32	3875.44
ENSMUSG00000019978.15	chr10	25359798	25523519	Epb41l2	protein_coding	KNOWN	163722	5801.94	0.39017	0.380554	0.0765948	5.09395	3.50675e-07	2.59984e-06	5063.1	4704.66	5077.54	6134.15	6081.52	6830.27	6722.36
ENSMUSG00000019979.12	chr10	90989311	91082770	Apaf1	protein_coding	KNOWN	93460	1722.16	-0.287382	-0.2665	0.131328	-2.18828	0.0286493	0.0607271	1901.09	2007.07	1809.39	2040.98	1595.06	1430.3	1271.24
ENSMUSG00000019984.16	chr10	24869986	24913681	Med23	protein_coding	KNOWN	43696	2233.46	-0.649128	-0.664108	0.111442	-5.8248	5.7181e-09	5.73246e-08	2903.36	2713.21	2873.66	2011.1	1827.66	1751.51	1553.74
ENSMUSG00000019986.16	chr10	20952547	21080428	Ahi1	protein_coding	KNOWN	127882	19850.1	0.139474	0.143991	0.101042	1.38036	0.167477	0.261424	19042.1	18347.9	18790.9	18356.4	19877	24139.3	20397.5
ENSMUSG00000019988.6	chr10	92684746	92722420	Nedd1	protein_coding	KNOWN	37675	216.116	0.0538945	0.0760181	0.160761	0.335246	0.73744	0.810647	223.087	212.916	192.902	246.562	238.993	187.165	211.188
ENSMUSG00000019990.14	chr10	20398004	20725078	Pde7b	protein_coding	KNOWN	327075	2338.44	-0.524882	-0.534097	0.10236	-5.12779	2.9317e-07	2.20501e-06	2871.03	2800.14	2850.89	2085.81	1736.97	2006.97	2017.26
ENSMUSG00000019992.7	chr10	20347819	20361669	Mtfr2	protein_coding	KNOWN	13851	78.812	0.640356	0.697639	0.228276	2.80518	0.00502883	0.0137817	54.9634	61.5307	57.9533	83.4324	112.028	88.5242	93.2518
ENSMUSG00000019996.16	chr10	20148471	20281589	Map7	protein_coding	KNOWN	133119	5512.61	-0.145796	-0.135421	0.0891981	-1.63452	0.10215	0.175868	5745.29	6010.48	5674.46	5170.32	5071.13	5712.34	5204.28
ENSMUSG00000019997.11	chr10	24595442	24598683	Ctgf	protein_coding	KNOWN	3242	203.334	0.0100041	0.0287194	0.166991	0.0599081	0.952229	0.969097	188.6	234.403	180.069	193.015	250.729	185.901	190.618
ENSMUSG00000019998.5	chr10	24149317	24188959	Stx7	protein_coding	KNOWN	39643	6117.14	0.0760928	0.0808831	0.0908543	0.837526	0.402297	0.518963	5844.44	6047.59	5873.98	6313.47	6287.44	5786.95	6666.13
ENSMUSG00000020000.7	chr10	24223517	24302790	Moxd1	protein_coding	KNOWN	79274	1001.99	-0.0570777	-0.0681934	0.114535	-0.498343	0.618242	0.715751	1005.51	1011.84	1070.07	840.551	944.236	1109.08	1032.63
ENSMUSG00000020003.15	chr10	19859929	19907689	Pex7	protein_coding	KNOWN	47761	1098.91	0.165251	0.166331	0.119994	1.37716	0.168463	0.262569	985.031	1061.65	1034.88	1118.24	1178.96	1021.82	1291.81
ENSMUSG00000020009.12	chr10	19591949	19610229	Ifngr1	protein_coding	KNOWN	18281	785.09	0.126835	0.126831	0.106314	1.19303	0.232858	0.339644	752.244	735.438	750.082	808.174	817.271	773.954	858.465
ENSMUSG00000020014.15	chr10	92775619	93081618	Cfap54	protein_coding	KNOWN	306000	2189.68	0.17815	0.195963	0.136245	1.30758	0.191017	0.290623	1991.62	2116.46	1956.75	2192.9	2150.94	2875.77	2043.31
ENSMUSG00000020015.9	chr10	93160876	93241342	Cdk17	protein_coding	KNOWN	80467	16698.4	-0.146255	-0.13906	0.0967047	-1.51238	0.130436	0.213962	17531.2	17855.6	17484.5	18527	16305.9	14357.4	14827
ENSMUSG00000020019.4	chr10	93640681	93747207	Ntn4	protein_coding	KNOWN	106527	428.087	0.347744	0.33958	0.127916	2.71854	0.00655714	0.0173678	352.412	371.138	391.599	427.124	486.521	475.501	492.315
ENSMUSG00000020021.4	chr10	94036001	94145339	Fgd6	protein_coding	KNOWN	109339	1614.8	0.306933	0.314879	0.10219	3.00355	0.00266849	0.0080096	1406.42	1425.95	1419.44	1666.16	1632.41	1773.01	1980.23
ENSMUSG00000020022.16	chr10	94198955	94221443	Ndufa12	protein_coding	KNOWN	22489	2813.16	0.307164	0.326657	0.138573	2.21662	0.026649	0.0571407	2443.18	2542.29	2383.95	2910.17	3016.22	2596.29	3800.01
ENSMUSG00000020023.17	chr10	94311949	94590956	Tmcc3	protein_coding	KNOWN	279008	3323.49	0.0581503	0.0492303	0.108923	0.533864	0.593435	0.695094	3339.84	3099	3337.7	3743.25	3102.64	3146.4	3495.57
ENSMUSG00000020024.6	chr10	94688790	94790336	Cep83	protein_coding	KNOWN	101547	2035.54	0.23257	0.237324	0.0966386	2.4066	0.0161019	0.0373495	1730.81	1970.94	1838.78	2189.17	2117.86	2138.49	2262.73
ENSMUSG00000020027.18	chr10	95385362	95417180	Socs2	protein_coding	KNOWN	31819	1233.75	0.19498	0.184667	0.156719	1.24414	0.213447	0.316914	1135.91	1073.37	1224.06	1276.39	1421.15	976.296	1529.06
ENSMUSG00000020029.5	chr10	95547007	95564167	Nudt4	protein_coding	KNOWN	17161	5028.6	0.270475	0.274504	0.0848158	3.18897	0.00142778	0.00462144	4344.26	4649.96	4478.14	5499.07	5432.82	5159.7	5636.25
ENSMUSG00000020032.14	chr10	84370905	84440597	Nuak1	protein_coding	KNOWN	69693	2893.23	-0.616119	-0.603693	0.092769	-6.64142	3.10666e-11	4.5035e-10	3471.32	3855.92	3460.23	2714.67	2420.87	2206.78	2122.85
ENSMUSG00000020034.7	chr10	84576626	84614359	Tcp11l2	protein_coding	KNOWN	37734	1717.16	-0.390972	-0.395197	0.0890215	-4.39188	1.12375e-05	6.11309e-05	1891.39	2092.04	1985.32	1567.78	1523.58	1487.21	1472.83
ENSMUSG00000020037.15	chr10	84756062	84906538	Rfx4	protein_coding	KNOWN	150477	1163.44	0.536851	0.555459	0.106142	5.05784	4.24037e-07	3.09219e-06	954.855	899.52	897.449	1413.37	1206.7	1373.39	1398.78
ENSMUSG00000020038.9	chr10	85131702	85185054	Cry1	protein_coding	KNOWN	53353	1343.93	0.853109	0.903081	0.0973968	8.75911	1.96794e-18	6.96337e-17	839.539	1036.26	817.142	1884.08	1768.97	1470.77	1590.77
ENSMUSG00000020042.15	chr10	85386814	85660292	Btbd11	protein_coding	KNOWN	273479	737.339	0.0202963	0.0354918	0.109443	0.185451	0.852876	0.898709	725.301	756.925	698.751	706.063	791.664	728.428	754.243
ENSMUSG00000020044.13	chr10	86300372	86349506	Timp3	protein_coding	KNOWN	49135	4204.9	0.346697	0.337368	0.0949675	3.65069	0.000261533	0.00102771	3659.92	3538.5	3765.72	4191.55	4816.14	4905.51	4557
ENSMUSG00000020048.13	chr10	86690209	86705509	Hsp90b1	protein_coding	KNOWN	15301	19276.8	0.782642	0.782423	0.100094	7.8191	5.3204e-15	1.27632e-13	14203.2	12756.4	14013.1	20396.1	24821.1	23819.3	24928.4
ENSMUSG00000020052.7	chr10	87490819	87493660	Ascl1	protein_coding	KNOWN	2842	349.406	0.251261	0.266759	0.144157	1.74297	0.081339	0.14561	292.06	337.931	309.222	343.692	356.356	419.858	386.721
ENSMUSG00000020053.18	chr10	87858265	87937042	Igf1	protein_coding	KNOWN	78778	860.016	0.368565	0.372102	0.102144	3.6083	0.000308209	0.00118569	698.359	770.599	739.733	950.134	978.378	925.71	957.203
ENSMUSG00000020056.16	chr10	88201093	88246158	Ccdc53	protein_coding	KNOWN	45066	675.897	-0.0251388	-0.0225483	0.127688	-0.196877	0.843924	0.891992	680.038	688.558	677.226	661.233	659.365	596.906	767.956
ENSMUSG00000020057.2	chr10	88322804	88379080	Dram1	protein_coding	KNOWN	56277	127.575	0.47949	0.526223	0.201061	2.3848	0.0170885	0.0392484	105.616	110.365	89.8276	165.62	158.973	154.285	108.337
ENSMUSG00000020059.9	chr10	88459569	88473236	Sycp3	protein_coding	KNOWN	13668	68.0449	-0.478272	-0.545471	0.284865	-1.67894	0.0931634	0.163101	88.3725	81.0643	79.4788	67.2441	42.6773	37.9389	79.5383
ENSMUSG00000020061.17	chr10	88518279	88605152	Mybpc1	protein_coding	KNOWN	86874	52.1176	0.48184	0.571602	0.29439	1.63674	0.101684	0.17528	40.9531	37.1138	44.2929	59.7725	96.024	45.5267	41.1405
ENSMUSG00000020063.16	chr10	63319005	63381704	Sirt1	protein_coding	KNOWN	62700	2188.11	0.718438	0.742937	0.110125	6.52382	6.85367e-11	9.29484e-10	1587.47	1604.68	1547.77	2790.63	2876.45	2693.67	2216.1
ENSMUSG00000020064.8	chr10	63243797	63317881	Herc4	protein_coding	KNOWN	74085	4049.16	1.37365	1.60956	0.28528	4.8151	1.47128e-06	9.57624e-06	1900.01	1846.9	1844.99	3341.03	5243.98	8663.99	5503.23
ENSMUSG00000020069.16	chr10	63014664	63024217	Hnrnph3	protein_coding	KNOWN	9554	3050.61	0.530783	0.529404	0.0932571	5.69161	1.25846e-08	1.19251e-07	2539.09	2282.5	2480.4	3268.81	3341.63	3970.94	3470.89
ENSMUSG00000020070.18	chr10	62980223	63017210	Rufy2	protein_coding	KNOWN	36988	5202.93	-0.346426	-0.347976	0.0867783	-3.99208	6.54954e-05	0.000298594	5849.83	6020.24	5917.03	5007.19	4758.52	4624.76	4242.96
ENSMUSG00000020072.14	chr10	63024315	63077962	Pbld2	protein_coding	KNOWN	53648	65.9185	-0.159279	-0.1669	0.237708	-0.670061	0.502819	0.614907	79.7508	70.3208	60.851	52.3009	61.8821	74.6133	61.7108
ENSMUSG00000020074.6	chr10	62743928	62792368	Ccar1	protein_coding	KNOWN	48441	5728.56	0.232558	0.248118	0.103745	2.24162	0.0249859	0.0542168	5217.21	5193	5111.07	7196.36	6253.29	5503.68	5625.28
ENSMUSG00000020075.7	chr10	62580248	62602298	Ddx21	protein_coding	KNOWN	22051	3538.94	0.676239	0.70872	0.110321	6.12975	8.80164e-10	1.00464e-08	2591.9	2697.58	2502.76	3727.06	4054.35	4940.92	4258.04
ENSMUSG00000020076.6	chr10	62616023	62651218	Ddx50	protein_coding	KNOWN	35196	7325.48	0.90645	0.944461	0.11441	7.9228	2.32226e-15	5.86936e-14	4693.44	5011.33	4675.18	7683.26	8660.3	10550.8	10004
ENSMUSG00000020077.14	chr10	62493833	62527451	Srgn	protein_coding	KNOWN	33619	279.018	0.585851	0.610017	0.159751	3.66727	0.000245158	0.000970719	212.31	213.892	217.325	307.579	313.678	293.395	394.949
ENSMUSG00000020078.15	chr10	62454843	62486805	Vps26a	protein_coding	KNOWN	31963	3305.13	-0.0626067	-0.0664931	0.0933618	-0.670582	0.502487	0.614695	3298.88	3455.49	3422.97	3426.96	3356.57	2878.3	3296.73
ENSMUSG00000020079.15	chr10	62429209	62449738	Supv3l1	protein_coding	KNOWN	20530	1232.13	-0.434785	-0.440961	0.100565	-4.32343	1.5362e-05	8.09376e-05	1421.5	1473.81	1455.87	1192.96	1080.8	1001.59	998.343
ENSMUSG00000020080.8	chr10	62383137	62422491	Hkdc1	protein_coding	KNOWN	39355	193.957	-0.175297	-0.18198	0.191334	-0.916182	0.359571	0.47648	200.455	218.776	204.906	185.544	208.052	131.522	208.445
ENSMUSG00000020083.13	chr10	62107655	62143920	2010107G23Rik	protein_coding	KNOWN	36266	986.37	-0.502542	-0.508006	0.108632	-4.62609	3.72634e-06	2.2305e-05	1201.65	1183.73	1178.11	848.022	837.542	760.044	895.492
ENSMUSG00000020085.15	chr10	61715263	61739260	Aifm2	protein_coding	KNOWN	23998	287.387	0.0657481	0.0726813	0.13889	0.473384	0.635939	0.729351	273.739	290.073	273.622	287.655	322.214	283.277	281.127
ENSMUSG00000020086.6	chr10	61738665	61784147	H2afy2	protein_coding	KNOWN	45483	616.442	-0.448954	-0.453272	0.127967	-3.50834	0.000450905	0.00166354	667.105	808.689	710.342	509.311	545.203	495.736	578.71
ENSMUSG00000020087.4	chr10	61695514	61702773	Tysnd1	protein_coding	KNOWN	7260	896.679	-0.407098	-0.404344	0.110018	-3.70029	0.000215351	0.000865908	1056.16	1048.95	1021.63	885.38	791.664	729.692	743.272
ENSMUSG00000020088.9	chr10	61680310	61693295	Sar1a	protein_coding	KNOWN	12986	9891.48	0.440889	0.452262	0.0833081	5.29227	1.20806e-07	9.78581e-07	8135.66	8303.72	8077.04	10666.9	11007.5	11100.9	11948.6
ENSMUSG00000020089.8	chr10	61648552	61674168	Ppa1	protein_coding	KNOWN	25617	3508.71	0.163918	0.173207	0.100414	1.63243	0.10259	0.176469	3236.38	3354.89	3219.72	3661.07	3796.15	3315.86	3976.92
ENSMUSG00000020090.7	chr10	61595492	61628565	Npffr1	protein_coding	KNOWN	33074	290.386	0.0877172	0.098726	0.14539	0.603323	0.546294	0.653847	274.817	290.073	272.381	317.541	277.403	278.219	322.267
ENSMUSG00000020091.14	chr10	61432497	61452669	Eif4ebp2	protein_coding	KNOWN	20173	2030.85	0.071157	0.084499	0.107283	0.663261	0.507163	0.618956	1878.46	2089.11	1921.98	1926.42	1968.49	2137.23	2294.27
ENSMUSG00000020092.8	chr10	61319657	61383523	Pald1	protein_coding	KNOWN	63867	1368.15	-0.285033	-0.279264	0.110409	-2.58161	0.00983401	0.0245598	1468.92	1598.82	1495.61	1151.87	1174.69	1292.45	1394.66
ENSMUSG00000020096.19	chr10	61171954	61188841	Tbata	protein_coding	KNOWN	16888	526.357	0.062119	0.0514821	0.151558	0.409869	0.681902	0.766924	516.225	486.386	544.347	557.877	584.679	413.534	581.453
ENSMUSG00000020097.14	chr10	61098642	61147703	Sgpl1	protein_coding	KNOWN	49062	3177.72	0.494834	0.50932	0.0829108	5.96827	2.39778e-09	2.53952e-08	2437.79	2710.28	2528.01	3993.55	3941.25	3315.86	3317.3
ENSMUSG00000020098.6	chr10	61089343	61094328	Pcbd1	protein_coding	KNOWN	4986	242.723	0.294458	0.293199	0.174502	1.68742	0.0915225	0.160807	218.776	195.336	230.985	234.109	280.603	223.84	315.411
ENSMUSG00000020099.7	chr10	60762610	60831581	Unc5b	protein_coding	KNOWN	68972	900.824	0.452711	0.462981	0.137602	3.29	0.00100187	0.00338427	773.799	694.418	753.807	932.7	942.102	1287.39	921.548
ENSMUSG00000020100.15	chr10	60712072	60752794	Slc29a3	protein_coding	KNOWN	40723	906.428	-0.189997	-0.187527	0.104255	-1.82243	0.0683893	0.126156	1033.53	929.797	959.541	785.759	858.881	858.685	918.805
ENSMUSG00000020101.14	chr10	60346851	60372684	Vsir	protein_coding	KNOWN	25834	1840.59	0.414056	0.427329	0.0891941	4.64219	3.44737e-06	2.07629e-05	1592.86	1507.99	1512.17	1925.17	2050.65	2175.17	2120.11
ENSMUSG00000020102.15	chr10	125219270	125389465	Slc16a7	protein_coding	KNOWN	170196	5503.36	0.136747	0.137433	0.107804	1.26847	0.204629	0.30648	5220.45	5147.09	5250.57	5510.28	5359.2	6683.58	5352.38
ENSMUSG00000020105.8	chr10	125966219	126015359	Lrig3	protein_coding	KNOWN	49141	114.896	0.0291484	0.0426209	0.190566	0.152957	0.878432	0.918026	113.16	123.061	102.66	114.564	128.032	106.229	116.565
ENSMUSG00000020107.10	chr10	59987409	60003135	Anapc16	protein_coding	KNOWN	15727	2833.9	-0.00845406	-0.00785398	0.0994781	-0.0849841	0.932274	0.955283	2809.6	2879.25	2839.3	2897.72	2769.76	2584.91	3056.74
ENSMUSG00000020108.3	chr10	59949675	59951770	Ddit4	protein_coding	KNOWN	2096	4117.33	-0.183278	-0.182097	0.111604	-1.64221	0.100546	0.173797	4429.4	4374.54	4445.85	4668.48	3907.11	3534.64	3461.29
ENSMUSG00000020109.13	chr10	59879556	59899302	Dnajb12	protein_coding	KNOWN	19747	2411.87	-0.0688782	-0.0719016	0.0858687	-0.802134	0.422475	0.538876	2491.67	2458.3	2492.41	2373.47	2450.75	2349.69	2266.84
ENSMUSG00000020111.15	chr10	59702477	59864132	Micu1	protein_coding	KNOWN	161656	5979.52	0.234866	0.238631	0.0832362	2.82168	0.00477728	0.0131935	5432.76	5399.08	5434.78	5933.67	6150.87	6706.34	6799.16
ENSMUSG00000020114.12	chr10	119199255	119240055	Cand1	protein_coding	KNOWN	40801	10935.9	-0.146337	-0.151329	0.0973956	-1.50251	0.132966	0.217293	11815	11158.5	11813.8	11265.9	11361.8	9692.14	9444.49
ENSMUSG00000020115.2	chr10	121546455	121586794	Tbk1	protein_coding	KNOWN	40340	3771.77	-0.135479	-0.126494	0.0939351	-1.44226	0.149228	0.23834	4053.28	3938.94	3893.22	3952.46	3753.47	3515.68	3295.36
ENSMUSG00000020121.15	chr10	121780991	122047315	Srgap1	protein_coding	KNOWN	266325	897.74	0.0528452	0.0608998	0.100491	0.525871	0.598978	0.699744	896.658	871.197	860.607	876.663	935.7	923.181	920.176
ENSMUSG00000020124.9	chr10	123113244	123196935	Usp15	protein_coding	KNOWN	83692	5409.13	0.13318	0.156239	0.0896954	1.4848	0.137597	0.223127	5140.7	5205.69	4885.46	6301.02	5809.45	5241.9	5279.7
ENSMUSG00000020130.8	chr10	115197877	115251493	Tbc1d15	protein_coding	KNOWN	53617	2682.89	-0.287906	-0.280547	0.0983259	-2.92807	0.00341069	0.00987925	2951.86	3094.12	2906.77	2677.31	2282.17	2473.62	2394.38
ENSMUSG00000020131.14	chr10	80321283	80329498	Pcsk4	protein_coding	KNOWN	8216	112.651	-0.14784	-0.14981	0.224603	-0.658226	0.510393	0.622117	104.538	148.455	105.144	95.885	113.095	89.7888	131.65
ENSMUSG00000020132.9	chr10	115289863	115315591	Rab21	protein_coding	KNOWN	25729	4298.44	0.231387	0.234172	0.0870589	2.65781	0.00786491	0.0202495	3795.71	4017.08	3902.74	4639.84	4645.43	4302.28	4786.01
ENSMUSG00000020133.8	chr10	80318254	80320537	2310011J03Rik	protein_coding	KNOWN	2284	1204.64	-0.284879	-0.293622	0.103431	-2.75428	0.00588208	0.0158166	1310.5	1367.35	1361.08	1155.6	1110.68	987.677	1139.59
ENSMUSG00000020135.13	chr10	80295977	80318263	Apc2	protein_coding	KNOWN	22287	7023.66	-0.562579	-0.564184	0.0762433	-7.37873	1.59807e-13	3.17351e-12	8733.79	8554.72	8563.84	5769.29	5806.25	5976.65	5761.04
ENSMUSG00000020137.4	chr10	115369966	115384435	Thap2	protein_coding	KNOWN	14470	957.837	-0.672363	-0.673643	0.133591	-5.03298	4.82907e-07	3.48322e-06	1264.16	1197.41	1190.53	935.191	796.999	682.901	637.678
ENSMUSG00000020140.15	chr10	115450311	115587780	Lgr5	protein_coding	KNOWN	137470	73.1301	0.832664	0.922665	0.251482	3.31102	0.000929557	0.00317166	49.5748	42.9738	52.5719	82.1872	119.496	91.0535	74.0529
ENSMUSG00000020150.13	chr10	80258151	80261012	Gamt	protein_coding	KNOWN	2862	446.677	0.141765	0.125659	0.124325	1.14027	0.254172	0.36358	440.785	386.764	446.241	449.539	467.317	445.15	490.943
ENSMUSG00000020151.16	chr10	116018213	116274932	Ptprr	protein_coding	KNOWN	256720	1034.22	-0.16614	-0.152031	0.104726	-1.58642	0.112644	0.19013	1091.72	1144.67	1054.34	1049.75	1001.85	886.507	1010.69
ENSMUSG00000020153.14	chr10	80249121	80256794	Ndufs7	protein_coding	KNOWN	7674	3075.41	0.0560921	0.0674488	0.0951319	0.589625	0.555442	0.661694	2950.78	3091.19	2938.65	2915.15	3051.43	3157.78	3422.89
ENSMUSG00000020154.9	chr10	116301374	116389538	Ptprb	protein_coding	KNOWN	88165	2906.61	0.240141	0.22923	0.109966	2.18379	0.0289778	0.0612567	2772.96	2431.93	2733.74	2925.12	3207.2	3444.86	2830.47
ENSMUSG00000020156.16	chr10	80226434	80243903	Mum1	protein_coding	KNOWN	17470	1964.05	-0.651894	-0.665024	0.0937092	-6.95656	3.48678e-12	5.80596e-11	2526.16	2429	2513.1	1586.46	1643.08	1584.58	1465.97
ENSMUSG00000020163.12	chr10	80402997	80406830	Uqcr11	protein_coding	KNOWN	3834	3680.34	0.383735	0.401695	0.130294	2.94514	0.00322806	0.00942212	3071.48	3181.04	3076.91	3733.29	3864.43	3725.6	5109.65
ENSMUSG00000020166.14	chr10	116485161	116581511	Cnot2	protein_coding	KNOWN	96351	4163.43	-0.155915	-0.151512	0.0792892	-1.96641	0.0492508	0.0962479	4373.36	4500.53	4370.92	4161.66	4071.42	3848.27	3817.84
ENSMUSG00000020167.14	chr10	80409514	80433647	Tcf3	protein_coding	KNOWN	24134	1402.05	0.0117533	0.0130038	0.0938589	0.125223	0.900347	0.932821	1381.63	1410.32	1392.54	1461.94	1349.67	1412.59	1405.63
ENSMUSG00000020169.4	chr10	116986314	117025040	Best3	protein_coding	KNOWN	38727	265.45	-0.0937979	-0.092753	0.195136	-0.480679	0.630745	0.725103	232.786	327.187	265.757	220.411	248.595	327.54	235.872
ENSMUSG00000020170.3	chr10	117070129	117148474	Frs2	protein_coding	KNOWN	78346	4839.01	-0.11182	-0.111521	0.107684	-1.03841	0.299079	0.413091	5088.97	5007.43	5065.12	5465.45	4500.32	4282.04	4463.75
ENSMUSG00000020171.7	chr10	117215142	117224507	Yeats4	protein_coding	KNOWN	9366	1427.03	-0.127763	-0.110665	0.100087	-1.27652	0.201773	0.303178	1476.47	1553.89	1439.31	1550.35	1455.3	1216.58	1297.3
ENSMUSG00000020175.13	chr10	75037058	75054748	Rab36	protein_coding	KNOWN	17691	2145	-0.0994795	-0.101241	0.0954296	-1.04244	0.297209	0.411055	2250.27	2202.41	2241.55	1983.7	1968.49	2314.28	2054.28
ENSMUSG00000020178.5	chr10	75316943	75334788	Adora2a	protein_coding	KNOWN	17846	83.2849	0.034511	0.0446386	0.240376	0.143571	0.885839	0.923142	94.8388	81.0643	69.544	88.4135	81.0869	104.964	63.0821
ENSMUSG00000020180.9	chr10	75517551	75537373	Snrpd3	protein_coding	KNOWN	19823	3364.08	0.152167	0.158171	0.0960564	1.58415	0.113161	0.190836	3046.7	3291.4	3127.41	3505.41	3488.87	3295.63	3793.16
ENSMUSG00000020181.15	chr10	109682660	110456204	Nav3	protein_coding	KNOWN	773545	5332.44	-0.112425	-0.119817	0.0894068	-1.25745	0.20859	0.311276	5555.62	5544.6	5660.38	4991	5101.01	4906.77	5567.68
ENSMUSG00000020183.11	chr10	117629500	117687352	Cpm	protein_coding	KNOWN	57853	986.541	0.340917	0.313324	0.112303	3.03569	0.00239982	0.00730884	886.959	773.529	938.844	1102.06	1143.75	1045.85	1014.8
ENSMUSG00000020184.14	chr10	117688888	117710758	Mdm2	protein_coding	KNOWN	21871	5125.36	0.296236	0.307888	0.0817115	3.62539	0.000288524	0.00112273	4494.07	4606.01	4435.91	5758.08	5627	5679.46	5276.96
ENSMUSG00000020186.6	chr10	110920177	110939599	Csrp2	protein_coding	KNOWN	19423	296.152	0.113827	0.125482	0.136588	0.833355	0.404645	0.521062	292.06	279.33	273.208	306.334	310.478	292.13	319.525
ENSMUSG00000020189.13	chr10	111164802	111297247	Osbpl8	protein_coding	KNOWN	132446	8594.44	0.311278	0.319559	0.0915055	3.40174	0.000669579	0.00237971	7392.04	7733.34	7458.18	9896.08	8793.66	9829.98	9057.77
ENSMUSG00000020190.13	chr10	80665327	80678112	Mknk2	protein_coding	KNOWN	12786	14368.7	2.38599	2.89439	0.307828	7.75105	9.11386e-15	2.10838e-13	3090.88	3089.23	3035.93	10679.4	19251.7	32239.3	29194.7
ENSMUSG00000020196.9	chr10	75646110	75764357	Cabin1	protein_coding	KNOWN	118248	6378.01	-0.099517	-0.0929359	0.0947833	-1.04994	0.293745	0.407386	6654.88	6674.62	6511.88	5668.43	6304.51	6775.9	6055.88
ENSMUSG00000020198.7	chr10	80706978	80742211	Ap3d1	protein_coding	KNOWN	35234	12531.3	0.0224212	0.0190631	0.0843636	0.265769	0.790417	0.851391	12782.8	12007.3	12520.4	11648.2	12918.4	13220.5	12621.9
ENSMUSG00000020205.8	chr10	111506286	111508645	Phlda1	protein_coding	KNOWN	2360	300.554	0.634302	0.675836	0.174563	3.63366	0.000279424	0.00109195	227.398	215.846	228.916	244.071	347.82	399.624	440.204
ENSMUSG00000020211.15	chr10	80798198	80804924	Sf3a2	protein_coding	KNOWN	6727	1574.1	-0.160568	-0.173215	0.091704	-1.75094	0.0799566	0.143465	1662.91	1666.21	1719.56	1474.39	1567.32	1489.74	1438.55
ENSMUSG00000020212.13	chr10	118141787	118168997	Mdm1	protein_coding	KNOWN	27211	382.279	-0.202438	-0.209633	0.155905	-1.29847	0.194127	0.294176	448.329	378.951	415.608	359.88	425.706	338.921	308.554
ENSMUSG00000020216.13	chr10	80808496	80813498	Jsrp1	protein_coding	KNOWN	5003	145.802	0.619231	0.627593	0.173784	3.56323	0.000366326	0.00138593	111.005	96.6911	125.841	160.639	160.04	175.784	190.618
ENSMUSG00000020218.11	chr10	121033960	121100650	Wif1	protein_coding	KNOWN	66691	35.5206	0.258197	0.324205	0.32377	0.797469	0.425178	0.541593	26.9428	35.1604	31.0464	34.8673	35.2088	27.8219	57.5967
ENSMUSG00000020219.6	chr10	80899450	80900969	Timm13	protein_coding	KNOWN	1520	2199.78	0.16196	0.163864	0.109084	1.48473	0.137615	0.223133	2090.77	2019.77	2064.38	2230.26	2312.04	2086.64	2594.6
ENSMUSG00000020224.14	chr10	120227070	120232071	Llph	protein_coding	KNOWN	5002	510.53	-0.0429159	-0.0338242	0.12416	-0.345652	0.729605	0.804633	523.769	522.523	505.85	550.405	534.533	438.827	497.8
ENSMUSG00000020225.10	chr10	120201590	120224917	Tmbim4	protein_coding	KNOWN	23328	1474.83	0.153857	0.153796	0.108122	1.42299	0.154739	0.245204	1389.17	1372.23	1395.85	1527.93	1583.33	1382.24	1673.05
ENSMUSG00000020228.11	chr10	120083608	120112987	Helb	protein_coding	KNOWN	29380	282.453	-0.27153	-0.285507	0.1463	-1.85598	0.0634564	0.118787	336.247	290.073	317.915	252.788	245.395	293.395	241.358
ENSMUSG00000020230.14	chr10	76207222	76237865	Prmt2	protein_coding	KNOWN	30644	3010.73	0.108056	0.11424	0.0915573	1.1802	0.237921	0.345219	2942.16	2836.27	2847.58	2956.25	3113.31	3006.03	3373.52
ENSMUSG00000020231.15	chr10	76259429	76345291	Dip2a	protein_coding	KNOWN	85863	3731.68	-0.0404847	-0.0259957	0.097423	-0.415556	0.677735	0.763451	3689.01	3974.1	3647.33	3527.82	3656.38	4050.61	3576.48
ENSMUSG00000020232.17	chr10	81346048	81350480	Hmg20b	protein_coding	KNOWN	4433	815.147	0.136	0.13464	0.109922	1.23725	0.215995	0.319576	770.565	761.809	783.612	779.533	818.338	944.68	847.495
ENSMUSG00000020235.16	chr10	81366222	81378516	Fzr1	protein_coding	KNOWN	12295	3100.21	-0.222857	-0.228458	0.0917373	-2.42929	0.0151282	0.035477	3282.72	3461.35	3406	2991.12	2981.01	2608.93	2970.35
ENSMUSG00000020238.14	chr10	81486249	81496392	Ncln	protein_coding	KNOWN	10144	2805.73	-0.216207	-0.233496	0.0835666	-2.58724	0.00967482	0.0242049	3034.84	3010.12	3158.04	2608.82	2708.94	2534.32	2585
ENSMUSG00000020241.13	chr10	76595762	76623630	Col6a2	protein_coding	KNOWN	27869	312.086	0.0255055	0.0300674	0.196949	0.129503	0.89696	0.930282	321.159	288.12	315.846	322.522	402.234	326.275	208.445
ENSMUSG00000020246.13	chr10	82696160	82742428	Hcfc2	protein_coding	KNOWN	46269	2830.92	-0.695864	-0.686722	0.127109	-5.47454	4.38639e-08	3.81731e-07	3533.82	3848.11	3456.5	2931.34	2217.09	1891.89	1937.72
ENSMUSG00000020248.18	chr10	82748701	82764144	Nfyb	protein_coding	KNOWN	15444	3498.75	-0.288698	-0.280969	0.100391	-2.87574	0.00403083	0.0114081	3811.87	4079.58	3785.59	3439.41	3171.99	2841.63	3361.18
ENSMUSG00000020250.9	chr10	82859206	82897724	Txnrd1	protein_coding	KNOWN	38519	6760.87	0.564923	0.58567	0.0783264	7.21242	5.49666e-13	1.02734e-11	5111.6	5561.2	5097.41	8107.89	8224.99	7398.09	7824.93
ENSMUSG00000020251.13	chr10	82650433	82690650	Glt8d2	protein_coding	KNOWN	40218	509.121	-0.744201	-0.77196	0.154269	-4.82406	1.40668e-06	9.20196e-06	622.919	711.021	667.291	428.37	331.816	452.738	349.694
ENSMUSG00000020255.8	chr10	83360221	83488505	D10Wsu102e	protein_coding	KNOWN	128285	4797.85	0.67112	0.709665	0.168221	3.98951	6.62094e-05	0.000301584	3602.8	3487.72	3468.92	4957.38	5488.3	7989.94	4589.91
ENSMUSG00000020256.14	chr10	83487450	83534140	Aldh1l2	protein_coding	KNOWN	46691	375.801	0.482902	0.48333	0.140287	3.44224	0.000576924	0.0020744	331.936	263.703	322.883	372.333	386.23	531.145	422.376
ENSMUSG00000020260.8	chr10	77259300	77269586	Pofut2	protein_coding	KNOWN	10287	1402.95	0.311829	0.310673	0.092976	3.35387	0.00079691	0.00277068	1236.14	1216.94	1247.65	1546.61	1596.13	1511.23	1465.97
ENSMUSG00000020262.15	chr10	77290726	77418270	Adarb1	protein_coding	KNOWN	127545	16619.8	0.0390382	0.0327768	0.0742996	0.525416	0.599294	0.700008	16548.3	16030.2	16634.7	16230.7	15960.3	17429.2	17505.3
ENSMUSG00000020263.14	chr10	83600033	83648738	Appl2	protein_coding	KNOWN	48706	9040.11	0.228481	0.23843	0.10066	2.26983	0.0232178	0.0509626	8081.78	8426.78	8086.14	9811.41	9084.93	10744.3	9045.43
ENSMUSG00000020265.15	chr10	77606097	77641543	Sumo3	protein_coding	KNOWN	35447	6333.62	-0.0367049	-0.0225712	0.0983975	-0.373027	0.709128	0.789109	6174.22	6830.88	6165.82	6395.66	6253.29	5730.05	6785.44
ENSMUSG00000020277.9	chr10	77986947	78010083	Pfkl	protein_coding	KNOWN	23137	14730.1	-0.0841378	-0.0992403	0.0874315	-0.962329	0.335885	0.452325	15604.2	14598.4	15732.7	13286.9	14886.9	14051.3	14950.5
ENSMUSG00000020284.16	chr10	77978524	77986905	1810043G02Rik	protein_coding	KNOWN	8382	1657.42	-0.340527	-0.33971	0.104436	-3.26062	0.0011117	0.00370938	1845.05	1950.43	1854.09	1478.12	1532.12	1341.77	1600.37
ENSMUSG00000020307.14	chr10	79682195	79688394	Cdc34	protein_coding	KNOWN	6200	1624	0.220655	0.228647	0.109678	2.01184	0.0442366	0.0879703	1474.31	1492.36	1469.94	1820.57	1810.59	1485.94	1814.3
ENSMUSG00000020308.5	chr10	79669410	79676126	Tpgs1	protein_coding	KNOWN	6717	1373.31	-0.225143	-0.218354	0.100201	-2.2469	0.0246461	0.0535727	1493.71	1526.55	1459.18	1307.52	1271.78	1191.28	1363.12
ENSMUSG00000020312.11	chr10	79617940	79637918	Shc2	protein_coding	KNOWN	19979	4187.22	-0.208905	-0.204476	0.0906027	-2.30572	0.0211262	0.0470482	4647.1	4476.11	4464.48	3903.89	4157.84	4005.09	3656.02
ENSMUSG00000020323.14	chr10	79781474	79790961	Prss57	protein_coding	KNOWN	9488	52.3666	-0.300358	-0.346311	0.265805	-1.12999	0.258479	0.368354	65.7406	52.7406	60.437	39.8483	52.2797	54.3792	41.1405
ENSMUSG00000020329.12	chr10	79736123	79746581	Polrmt	protein_coding	KNOWN	10459	1462.74	-0.304024	-0.315924	0.0995544	-3.05384	0.00225929	0.00694058	1649.98	1611.52	1682.3	1449.48	1350.74	1259.57	1235.59
ENSMUSG00000020331.9	chr10	79716634	79736108	Hcn2	protein_coding	KNOWN	19475	5000.15	0.0753446	0.0796527	0.103445	0.728354	0.466397	0.580814	4918.69	4786.7	4823.79	5096.85	4692.37	4844.8	5837.84
ENSMUSG00000023068.14	chr10	52417547	52440192	Nus1	protein_coding	KNOWN	22646	6876.93	-0.0696081	-0.0593598	0.100832	-0.690337	0.489983	0.602761	6955.57	7263.55	6898.1	7559.98	6832.64	5818.57	6810.13
ENSMUSG00000023175.15	chr10	79704491	79711969	Bsg	protein_coding	KNOWN	7479	19899.4	0.346906	0.342258	0.0854865	4.05802	4.94904e-05	0.000231386	17522.6	16710	17544.1	20995.1	22129.3	20963.8	23430.9
ENSMUSG00000025348.8	chr10	128933813	128958277	Itga7	protein_coding	KNOWN	24465	2383.6	-0.0861801	-0.118503	0.138084	-0.624112	0.532554	0.641347	2705.06	2094.97	2688.21	2192.9	2436.87	2625.37	1941.83
ENSMUSG00000025350.15	chr10	128913593	128922888	Rdh5	protein_coding	KNOWN	9296	115.677	0.119296	0.116508	0.194991	0.611803	0.540668	0.64901	111.005	102.551	117.562	119.545	114.162	136.58	108.337
ENSMUSG00000025351.13	chr10	128908919	128912816	Cd63	protein_coding	KNOWN	3898	3044.68	0.468911	0.480261	0.0928072	5.05253	4.3599e-07	3.17045e-06	2502.45	2480.76	2468.81	3237.68	3319.23	3461.3	3842.52
ENSMUSG00000025352.6	chr10	128882295	128891718	Gdf11	protein_coding	KNOWN	9424	1920.98	0.0119153	0.00954019	0.10855	0.109767	0.912594	0.9415	1951.74	1859.59	1929.85	2143.09	1831.92	1764.16	1966.52
ENSMUSG00000025353.4	chr10	128817457	128821631	Ormdl2	protein_coding	KNOWN	4175	121.122	-0.0160521	-0.00680646	0.18628	-0.0861719	0.93133	0.954757	135.792	117.201	111.353	122.036	119.496	122.669	119.307
ENSMUSG00000025354.4	chr10	128805676	128819446	Dnajc14	protein_coding	KNOWN	13771	2840.51	-0.572549	-0.572396	0.114894	-4.98326	6.25203e-07	4.3925e-06	3399.11	3654.73	3429.59	2679.8	2458.21	1885.57	2376.55
ENSMUSG00000025355.6	chr10	128790953	128800824	Mmp19	protein_coding	KNOWN	9872	82.1105	-0.571141	-0.633312	0.224311	-2.5462	0.0108903	0.0267473	80.8285	115.248	113.009	83.4324	68.2837	63.2316	50.74
ENSMUSG00000025357.7	chr10	128720141	128744056	Dgka	protein_coding	KNOWN	23916	1197.59	-0.03247	-0.0471385	0.133565	-0.243102	0.807926	0.864568	1285.71	1110.48	1263.8	1017.38	1252.58	1383.51	1069.65
ENSMUSG00000025358.15	chr10	128697939	128705051	Cdk2	protein_coding	KNOWN	7113	154.658	0.392343	0.417679	0.184582	2.12558	0.0335385	0.0693256	135.792	125.991	127.497	199.242	171.776	178.313	143.992
ENSMUSG00000025362.5	chr10	128624530	128626506	Rps26	protein_coding	KNOWN	1977	5239.94	0.409268	0.425398	0.1156	3.54037	0.000399563	0.00149353	4397.07	4433.14	4313.8	5515.26	5693.15	5362.04	6965.09
ENSMUSG00000025364.12	chr10	128557766	128565934	Pa2g4	protein_coding	KNOWN	8169	4147.03	0.157331	0.164284	0.0873507	1.80114	0.0716802	0.131297	3951.98	3847.13	3839.82	4399.5	4420.3	4068.32	4502.14
ENSMUSG00000025366.7	chr10	128510248	128525859	Esyt1	protein_coding	KNOWN	15612	498.032	0.438767	0.429463	0.126505	3.46837	0.000523618	0.00190195	397.676	404.345	444.999	489.387	546.27	623.463	580.081
ENSMUSG00000025369.14	chr10	128459236	128490173	Smarcc2	protein_coding	KNOWN	30938	19700.6	0.107474	0.106173	0.0739851	1.45264	0.146324	0.234664	19138	18506.1	18986.3	19361.3	19651.8	20951.1	21309.4
ENSMUSG00000025373.13	chr10	128411616	128441438	Rnf41	protein_coding	KNOWN	29823	3965.69	0.201071	0.211129	0.0891364	2.25576	0.0240854	0.0525559	3627.59	3705.52	3581.1	4084.45	4269.87	4015.2	4476.09
ENSMUSG00000025374.13	chr10	128401395	128411492	Nabp2	protein_coding	KNOWN	10098	1923.8	-0.147141	-0.147388	0.0986867	-1.49099	0.135964	0.221102	2103.7	1976.8	2030.02	1719.7	1820.19	1774.28	2041.94
ENSMUSG00000025381.2	chr10	128322459	128327187	Cnpy2	protein_coding	KNOWN	4729	1516.15	-0.171773	-0.162659	0.11454	-1.49968	0.133698	0.218146	1641.36	1634.96	1567.22	1357.33	1411.55	1331.66	1668.93
ENSMUSG00000025393.12	chr10	128083273	128090391	Atp5b	protein_coding	KNOWN	7119	67450.7	0.275147	0.288249	0.088753	3.10014	0.0019343	0.00604963	58952	61962.4	58734.4	68268.9	74056.9	71817.2	78363.1
ENSMUSG00000025395.14	chr10	128015168	128030037	Prim1	protein_coding	KNOWN	14870	284.761	-0.214811	-0.217093	0.14314	-1.5007	0.133433	0.217781	298.527	322.304	307.567	262.75	243.261	283.277	275.641
ENSMUSG00000025400.10	chr10	127724478	127731767	Tac2	protein_coding	KNOWN	7290	95.9568	-0.0645076	-0.0691119	0.2365	-0.272759	0.785038	0.847062	74.3623	132.828	88.5858	98.3756	108.827	64.4962	104.223
ENSMUSG00000025401.8	chr10	127705170	127720887	Myo1a	protein_coding	KNOWN	15718	54.8704	0.180531	0.182524	0.265522	0.67991	0.496562	0.608882	57.1188	33.207	62.5068	48.5652	60.8152	67.0255	54.854
ENSMUSG00000025402.12	chr10	127660918	127668568	Nab2	protein_coding	KNOWN	7651	4628.74	2.1914	2.23324	0.123461	17.7498	1.7299e-70	7.69508e-68	1544.36	1385.91	1527.07	6059.44	7553.89	7931.77	6398.72
ENSMUSG00000025403.4	chr10	127517123	127522444	Shmt2	protein_coding	KNOWN	5322	1032.67	-0.260278	-0.251097	0.10462	-2.48785	0.0128519	0.0308118	1152.08	1159.32	1097.8	901.568	1032.79	948.474	936.632
ENSMUSG00000025404.15	chr10	127380327	127499384	R3hdm2	protein_coding	KNOWN	119058	9756.22	0.182243	0.1868	0.084204	2.1643	0.0304414	0.0637877	9188.59	8850.65	9086.67	9390.51	9458.36	11278	11040.7
ENSMUSG00000025407.6	chr10	127329889	127341589	Gli1	protein_coding	KNOWN	11701	166.108	0.230596	0.243717	0.17897	1.28846	0.197586	0.298401	148.725	149.432	152.748	153.167	169.642	216.252	172.79
ENSMUSG00000025408.15	chr10	127290774	127296288	Ddit3	protein_coding	KNOWN	5515	2551.55	1.57969	1.63726	0.13164	12.0001	3.54756e-33	3.4957e-31	1207.04	1149.55	1113.12	3190.36	3523.01	3222.28	4455.52
ENSMUSG00000025409.14	chr10	127281956	127289018	Mbd6	protein_coding	KNOWN	7063	3271.09	0.473054	0.475301	0.109052	4.33788	1.43861e-05	7.62089e-05	2761.1	2521.78	2741.19	4099.4	3878.3	3648.46	3247.36
ENSMUSG00000025410.9	chr10	127266262	127281959	Dctn2	protein_coding	KNOWN	15698	13808.3	0.151041	0.161219	0.0970636	1.5561	0.119684	0.199631	12579.1	13522.1	12702.1	13621.9	14860.2	13654.2	15718.4
ENSMUSG00000025417.7	chr10	127197067	127211622	Pip4k2c	protein_coding	KNOWN	14556	6061.18	0.0442242	0.0417859	0.131355	0.336676	0.736361	0.80969	5983.47	5833.7	6066.06	6227.55	6750.49	4814.45	6752.53
ENSMUSG00000025422.8	chr10	127078907	127093169	Agap2	protein_coding	KNOWN	14263	104212	0.361071	0.373089	0.0914295	3.94918	7.84197e-05	0.000351444	88967.4	89804.6	88749.3	106627	105954	119533	129850
ENSMUSG00000025436.11	chr10	126868430	126901371	Xrcc6bp1	protein_coding	KNOWN	32942	238.201	-0.681208	-0.688554	0.159367	-4.27445	1.91611e-05	9.87372e-05	287.75	345.744	279.004	222.902	176.044	169.461	186.504
ENSMUSG00000025795.7	chr10	121410350	121476250	Rassf3	protein_coding	KNOWN	65901	897.681	0.409596	0.455104	0.137855	2.9712	0.0029664	0.00875523	714.524	834.083	673.5	998.699	833.275	1106.55	1123.14
ENSMUSG00000028630.8	chr10	118859349	118868903	Dyrk2	protein_coding	KNOWN	9555	1260.17	-0.0507745	-0.0348833	0.104485	-0.485949	0.627003	0.722722	1278.17	1313.63	1241.03	1405.9	1320.86	1167.25	1094.34
ENSMUSG00000032714.6	chr10	78584503	78591964	Syde1	protein_coding	KNOWN	7462	477.324	0.0883808	0.0940702	0.119329	0.740648	0.458907	0.573502	475.272	445.365	458.245	457.011	458.781	500.794	545.797
ENSMUSG00000032763.10	chr10	78574500	78584498	Ilvbl	protein_coding	KNOWN	9999	761.036	0.293093	0.292681	0.112569	2.60368	0.00922275	0.0232307	636.929	697.348	688.817	773.307	801.267	873.86	855.723
ENSMUSG00000032788.14	chr10	78436744	78464975	Pdxk	protein_coding	KNOWN	28232	10368.1	-0.000408784	-0.00625369	0.0865653	-0.00472226	0.996232	0.997289	10391.3	10196.5	10593.5	9259.76	9977.96	11092.1	11065.4
ENSMUSG00000032834.10	chr10	78170910	78185149	Pwp2	protein_coding	KNOWN	14240	1746.29	-0.550217	-0.552692	0.110626	-4.97368	6.56946e-07	4.5886e-06	2188.84	2082.28	2132.27	1610.12	1611.07	1291.19	1308.27
ENSMUSG00000032977.8	chr10	77486656	77515813	Fam207a	protein_coding	KNOWN	29158	1514.15	0.541085	0.566445	0.12257	4.41449	1.01247e-05	5.55238e-05	1082.02	1329.26	1152.03	1592.69	1696.42	1851.42	1895.21
ENSMUSG00000033105.12	chr10	76531588	76557138	Lss	protein_coding	KNOWN	25551	2652.61	0.255297	0.278016	0.137474	1.85705	0.0633035	0.118558	2278.29	2466.11	2351.66	2202.87	2734.55	3473.94	3060.85
ENSMUSG00000033126.4	chr10	76459569	76469114	Ybey	protein_coding	KNOWN	9546	200.63	-1.26209	-1.31112	0.188102	-6.70962	1.95136e-11	2.93251e-10	288.827	329.14	295.562	170.601	139.768	87.2596	93.2518
ENSMUSG00000033208.7	chr10	76253853	76261159	S100b	protein_coding	KNOWN	7307	5533.05	0.466772	0.483876	0.110677	4.21742	2.47119e-05	0.000124069	4537.18	4538.62	4444.61	5885.1	5960.95	5918.48	7446.43
ENSMUSG00000033307.6	chr10	75859353	75860250	Mif	protein_coding	KNOWN	898	4877.02	0.348204	0.379526	0.120332	2.8937	0.00380732	0.0108485	4144.89	4383.33	3956.14	4637.35	5241.84	5300.07	6475.52
ENSMUSG00000033318.6	chr10	75831845	75834881	Gstt2	protein_coding	KNOWN	3037	81.869	0.0813413	0.0960274	0.225208	0.361184	0.717962	0.795461	75.44	85.9477	74.9254	79.6967	81.0869	75.8779	100.109
ENSMUSG00000033416.14	chr10	75351111	75517972	Gucd1	protein_coding	KNOWN	166862	628.636	-0.596677	-0.600277	0.142566	-4.18527	2.84831e-05	0.000140734	784.576	784.272	772.435	656.252	533.467	422.387	447.06
ENSMUSG00000033444.13	chr10	75212073	75312399	Specc1l	protein_coding	KNOWN	100327	3844	-0.24645	-0.249399	0.0895728	-2.75139	0.00593423	0.0159375	4264.51	4184.09	4233.9	3725.82	3633.97	3599.14	3266.56
ENSMUSG00000034024.7	chr10	117050998	117063814	Cct2	protein_coding	KNOWN	12817	9451.6	0.174908	0.175807	0.0884735	1.97696	0.0480463	0.0943533	8763.97	8811.59	8824.22	9380.55	10222.3	9574.52	10584.1
ENSMUSG00000034057.7	chr10	116776545	116896879	Myrfl	protein_coding	KNOWN	120335	71.7438	-0.167993	-0.181478	0.249019	-0.67462	0.499917	0.612061	66.8183	82.0409	81.9625	59.7725	54.4136	87.2596	69.9389
ENSMUSG00000034163.10	chr10	115384959	115432772	Zfc3h1	protein_coding	KNOWN	47814	7433.43	0.190093	0.184488	0.107606	1.76657	0.0772998	0.139583	7031.01	6616.99	7039.67	8196.3	7558.15	8633.64	6958.23
ENSMUSG00000034453.7	chr10	84622437	84727177	Polr3b	protein_coding	KNOWN	104741	1294.53	-0.229818	-0.231083	0.0977055	-2.35215	0.0186653	0.0423061	1447.37	1388.84	1406.2	1159.34	1210.97	1286.13	1162.91
ENSMUSG00000034560.5	chr10	83543941	83596469	A230046K03Rik	protein_coding	KNOWN	52529	4252.26	-0.364905	-0.361623	0.120054	-3.03951	0.00236966	0.00723396	4802.29	4996.68	4808.47	4694.63	3684.12	3562.47	3217.19
ENSMUSG00000034591.5	chr10	83230848	83337882	Slc41a2	protein_coding	KNOWN	107035	1143.72	-0.29935	-0.293571	0.106886	-2.80065	0.00510002	0.0139523	1298.65	1283.35	1252.62	1090.85	1153.35	1001.59	925.662
ENSMUSG00000034602.13	chr10	122992061	123076505	Mon2	protein_coding	KNOWN	84445	9396.67	0.393846	0.406487	0.111505	3.53209	0.000412283	0.00153597	7894.25	7835.89	8039.37	8757.92	9658.94	12622.3	10968.1
ENSMUSG00000034612.7	chr10	82985498	83195900	Chst11	protein_coding	KNOWN	210403	6087.85	0.141736	0.1223	0.0800124	1.77143	0.0764895	0.13835	5873.54	5481.12	6030.04	5934.91	6111.39	6388.92	6795.04
ENSMUSG00000034613.12	chr10	122678762	122945795	Ppm1h	protein_coding	KNOWN	267034	6354.62	-0.216669	-0.220775	0.0752506	-2.8793	0.00398564	0.0112967	7024.54	6776.19	6945.29	5821.59	5814.78	6071.5	6028.46
ENSMUSG00000034620.17	chr10	122078114	122097371	Tmem5	protein_coding	KNOWN	19258	1230.33	-0.153445	-0.169567	0.10698	-1.43433	0.151477	0.240968	1296.49	1287.26	1356.94	1178.02	1140.55	1074.94	1278.1
ENSMUSG00000034667.7	chr10	121587380	121626316	Xpot	protein_coding	KNOWN	38937	7222.56	-0.0274627	-0.0247004	0.0795582	-0.34519	0.729952	0.804803	7330.61	7281.13	7268.17	6867.61	6924.4	7280.48	7605.51
ENSMUSG00000034674.18	chr10	82629828	82650799	Tdg	protein_coding	KNOWN	20972	740.912	-0.0729721	-0.0591707	0.124662	-0.585362	0.558304	0.664341	764.099	782.319	728.556	821.872	738.318	742.339	608.88
ENSMUSG00000034707.6	chr10	121365090	121397245	Gns	protein_coding	KNOWN	32156	5183.14	-0.277291	-0.274354	0.0804665	-3.44605	0.000568848	0.00204914	5714.04	5854.21	5688.95	4653.54	4952.7	4646.26	4772.3
ENSMUSG00000034748.16	chr10	81621785	81627797	Sirt6	protein_coding	KNOWN	6013	735.156	-0.560665	-0.576088	0.106987	-5.24052	1.60128e-07	1.26229e-06	930.067	871.197	915.248	603.951	617.754	620.934	586.938
ENSMUSG00000034758.12	chr10	81590904	81601073	Tle6	protein_coding	KNOWN	10170	80.0109	-0.0100635	-0.0140874	0.224221	-0.044882	0.964201	0.97713	91.6057	67.3908	82.3765	59.7725	78.953	93.5827	86.3951
ENSMUSG00000034771.15	chr10	81574561	81590845	Tle2	protein_coding	KNOWN	16285	970.619	0.132392	0.130036	0.121067	1.09355	0.274153	0.385956	944.077	882.917	935.946	895.342	1014.65	1171.05	950.346
ENSMUSG00000034781.5	chr10	81528724	81545190	Gna11	protein_coding	KNOWN	16467	8413.28	-0.0831225	-0.0712384	0.0973862	-0.853535	0.393363	0.509886	8416.95	9149.52	8387.91	8605.99	8170.57	7386.71	8775.27
ENSMUSG00000034792.8	chr10	81502306	81524225	Gna15	protein_coding	KNOWN	21920	102.798	0.399399	0.431362	0.201867	1.97853	0.0478692	0.0940766	78.6731	95.7144	82.7905	129.507	110.961	116.346	105.594
ENSMUSG00000034813.16	chr10	119454034	120087261	Grip1	protein_coding	KNOWN	633228	1949.94	0.0611018	0.0656387	0.0893273	0.684022	0.493961	0.606266	1930.19	1884.99	1883.07	1963.78	2027.17	2048.7	1911.66
ENSMUSG00000034818.16	chr10	81459227	81482709	Celf5	protein_coding	KNOWN	23483	11940.4	-0.167596	-0.18481	0.0873514	-1.91864	0.0550304	0.1055	13089.9	12173.3	13200.5	11143.8	11469.5	11877.4	10628
ENSMUSG00000034854.8	chr10	81357491	81366225	Mfsd12	protein_coding	KNOWN	8735	1754.31	0.0209425	0.0168275	0.10025	0.208903	0.834524	0.885303	1710.33	1754.11	1763.44	1890.31	1754.04	1590.91	1817.04
ENSMUSG00000034872.5	chr10	81337762	81343266	Gipc3	protein_coding	KNOWN	5505	86.8205	0.167477	0.20345	0.24386	0.686774	0.492225	0.60466	80.8285	81.0643	77.823	68.4893	77.8861	87.2596	134.392
ENSMUSG00000034881.7	chr10	81328732	81335171	Tbxa2r	protein_coding	KNOWN	6440	45.5776	-0.445227	-0.514741	0.283917	-1.56816	0.116844	0.19586	57.1188	50.7872	57.1254	46.0746	41.6104	26.5573	39.7692
ENSMUSG00000034889.7	chr10	81321103	81326251	Cactin	protein_coding	KNOWN	5149	1455.53	-0.235672	-0.230207	0.101275	-2.32704	0.0199631	0.0448884	1615.49	1589.05	1563.91	1473.14	1405.15	1322.8	1219.13
ENSMUSG00000034902.17	chr10	81292963	81319973	Pip5k1c	protein_coding	KNOWN	27011	23123	0.132771	0.134327	0.0895256	1.48305	0.138062	0.223658	21914.2	21885.4	21905.5	24029.8	24261	22175.3	25689.5
ENSMUSG00000034917.7	chr10	81273207	81291267	Tjp3	protein_coding	KNOWN	18061	68.7857	0.169288	0.209116	0.319349	0.530101	0.596042	0.697151	59.2743	69.3441	60.851	67.2441	76.8192	34.145	113.822
ENSMUSG00000034932.4	chr10	81264713	81266934	Mrpl54	protein_coding	KNOWN	2222	749.039	0.369038	0.39293	0.115855	3.18535	0.00144579	0.004671	643.395	653.397	609.338	803.193	816.204	786.601	931.147
ENSMUSG00000034949.18	chr10	81233155	81252123	Zfr2	protein_coding	KNOWN	18969	2917.32	0.0294825	0.0114818	0.0999729	0.294905	0.768067	0.834091	2977.72	2709.3	3025.16	2658.63	2888.19	3322.19	2840.07
ENSMUSG00000034958.11	chr10	81204508	81230833	Atcay	protein_coding	KNOWN	26326	10874.9	0.0393673	0.0441008	0.0763412	0.515675	0.606081	0.70529	10588.5	10870.4	10597.2	10881.1	11449.3	10750.6	10987.3
ENSMUSG00000034974.12	chr10	81183007	81193197	Dapk3	protein_coding	KNOWN	10191	1512.02	0.2008	0.205718	0.114568	1.75267	0.079658	0.143094	1352.53	1405.44	1412.82	1380.99	1518.25	1665.52	1848.58
ENSMUSG00000034994.9	chr10	81176631	81182507	Eef2	protein_coding	KNOWN	5877	78862.3	0.386608	0.401016	0.0992544	3.89512	9.81506e-05	0.000429605	66834.4	66265.6	66870.7	74530.1	81319.5	99307.7	96907.9
ENSMUSG00000035011.15	chr10	81135220	81152995	Zbtb7a	protein_coding	KNOWN	17776	6786.53	0.138776	0.146241	0.0796692	1.7419	0.0815261	0.145879	6264.75	6599.41	6325.6	7462.85	7195.4	7031.35	6626.37
ENSMUSG00000035027.17	chr10	81105915	81124697	Map2k2	protein_coding	KNOWN	18783	4250.02	0.340604	0.3514	0.0858949	3.96536	7.32853e-05	0.000331295	3690.09	3704.54	3619.6	4664.75	4730.78	4435.06	4905.32
ENSMUSG00000035041.8	chr10	81084324	81098874	Creb3l3	protein_coding	KNOWN	14551	47.2916	-0.172541	-0.205086	0.27419	-0.629274	0.52917	0.638358	60.352	38.0904	55.0557	39.8483	43.7443	40.4682	53.4827
ENSMUSG00000035189.16	chr10	88948994	89344762	Ano4	protein_coding	KNOWN	395769	649.662	0.144216	0.164415	0.113201	1.27398	0.202671	0.304134	583.043	660.234	579.947	752.137	689.239	672.784	610.251
ENSMUSG00000035206.9	chr10	80855275	80868705	Sppl2b	protein_coding	KNOWN	13431	1601.24	-0.362394	-0.366779	0.0936706	-3.86881	0.000109369	0.000472464	1893.54	1782.44	1834.64	1469.41	1429.69	1364.54	1434.43
ENSMUSG00000035215.8	chr10	80852825	80855209	Lsm7	protein_coding	KNOWN	2385	832.552	0.109952	0.121098	0.134969	0.814647	0.415274	0.531812	780.265	821.386	776.988	857.984	805.534	761.308	1024.4
ENSMUSG00000035242.15	chr10	80826656	80829290	Oaz1	protein_coding	KNOWN	2635	11430.7	0.755688	0.783411	0.110325	6.84963	7.40438e-12	1.17752e-10	8056.99	8233.39	7993.83	11772.7	13154.2	14410.5	16393.1
ENSMUSG00000035262.4	chr10	80805248	80807648	Amh	protein_coding	KNOWN	2401	93.1939	-0.38571	-0.408699	0.221379	-1.74231	0.081455	0.145784	106.694	118.178	100.59	90.904	101.359	78.4072	56.2254
ENSMUSG00000035278.8	chr10	80796100	80798626	Plekhj1	protein_coding	KNOWN	2527	1000.03	-0.0523794	-0.0617032	0.115893	-0.451963	0.651295	0.742043	1038.92	987.421	1047.3	1031.08	960.24	873.86	1061.43
ENSMUSG00000035311.16	chr10	88379132	88447329	Gnptab	protein_coding	KNOWN	68198	4455.96	-0.232508	-0.22826	0.0946932	-2.45538	0.0140736	0.0332947	5052.32	4723.21	4812.2	4472.98	4318.94	3857.13	3954.97
ENSMUSG00000035351.15	chr10	88146992	88178388	Nup37	protein_coding	KNOWN	31397	181.19	-0.927402	-0.982077	0.193864	-4.78378	1.72027e-06	1.10582e-05	275.895	227.566	253.753	159.393	133.367	110.023	108.337
ENSMUSG00000035370.7	chr10	80602880	80615783	Adat3	protein_coding	KNOWN	12904	212.917	-0.0971399	-0.107922	0.176076	-0.551694	0.581158	0.684887	210.154	224.636	231.399	254.033	198.45	209.929	161.819
ENSMUSG00000035397.8	chr10	80567124	80577321	Klf16	protein_coding	KNOWN	10198	5430.16	1.14572	1.22055	0.147488	7.7682	7.96096e-15	1.86663e-13	3012.21	3347.07	2895.6	5301.07	6685.4	9024.41	7745.39
ENSMUSG00000035459.15	chr10	86841198	87008025	Stab2	protein_coding	KNOWN	166828	234.902	1.38497	1.51162	0.20732	6.68033	2.38398e-11	3.54636e-10	122.859	104.505	115.079	179.317	301.942	416.064	404.548
ENSMUSG00000035478.14	chr10	80392539	80399550	Mbd3	protein_coding	KNOWN	7012	5269.46	0.146197	0.151892	0.110488	1.3232	0.185769	0.284249	4996.28	4942.97	4926.03	5289.87	5422.15	4963.68	6345.24
ENSMUSG00000035486.14	chr10	80356459	80365489	Plk5	protein_coding	KNOWN	9031	2436.21	-0.0297211	-0.00637709	0.135171	-0.219877	0.825967	0.8791	2303.07	2738.6	2285.43	2226.53	2221.35	2955.44	2323.07
ENSMUSG00000035504.16	chr10	80329953	80336441	Reep6	protein_coding	KNOWN	6489	409.076	-0.0607745	-0.0454424	0.134588	-0.451558	0.651587	0.742158	422.464	433.645	393.255	392.257	417.171	360.42	444.318
ENSMUSG00000035529.9	chr10	85891970	85916945	Prdm4	protein_coding	KNOWN	24976	1703.41	-0.296811	-0.295606	0.109834	-2.70236	0.00688494	0.0180975	1886	1920.15	1909.15	1800.65	1643.08	1313.95	1450.89
ENSMUSG00000035595.6	chr10	80172944	80175146	1600002K03Rik	protein_coding	KNOWN	2203	127.565	-0.189875	-0.19131	0.184847	-1.0272	0.304324	0.418961	157.346	125.015	129.567	119.545	102.426	131.522	127.536
ENSMUSG00000035620.14	chr10	84917616	85016446	Ric8b	protein_coding	KNOWN	98831	2683.57	0.28584	0.298917	0.0854098	3.34669	0.000817827	0.00283328	2380.67	2408.49	2325.58	3024.74	2979.94	2918.77	2746.82
ENSMUSG00000035621.13	chr10	80148272	80158368	Midn	protein_coding	KNOWN	10097	10075.3	2.66583	3.32747	0.325628	8.18672	2.68445e-16	7.61979e-15	1702.79	1488.46	1711.69	6825.27	14877.3	23547.4	20374.2
ENSMUSG00000035640.18	chr10	80130451	80140835	Cbarp	protein_coding	KNOWN	10385	21603.3	1.25631	1.31136	0.136265	9.2196	2.9821e-20	1.25822e-18	11912	11496.5	11686.3	20472.1	27836.3	35017.6	32802.7
ENSMUSG00000035673.9	chr10	80057416	80102698	Sbno2	protein_coding	KNOWN	45283	1170.4	0.0228004	0.016878	0.124699	0.182844	0.854921	0.900133	1207.04	1096.81	1183.9	1232.81	1210.97	1268.43	992.858
ENSMUSG00000035681.6	chr10	112271123	112466304	Kcnc2	protein_coding	KNOWN	195182	6384.29	0.0198685	0.0142376	0.102316	0.194188	0.846029	0.893611	6424.25	6156	6464.69	6652.18	6826.24	5573.23	6593.45
ENSMUSG00000035697.14	chr10	80016653	80031472	Hmha1	protein_coding	KNOWN	14820	331.064	0.13411	0.136787	0.140678	0.953311	0.340433	0.456638	337.324	289.097	313.362	357.39	363.824	330.069	326.381
ENSMUSG00000035722.15	chr10	79996494	80015572	Abca7	protein_coding	KNOWN	19079	933.392	0.130382	0.121476	0.116046	1.12354	0.261208	0.371427	903.124	840.92	922.286	900.323	884.487	1143.23	939.375
ENSMUSG00000035754.7	chr10	79960152	79969246	Wdr18	protein_coding	KNOWN	9095	2961.12	-0.0547186	-0.0576568	0.0944708	-0.579211	0.562447	0.668147	2988.5	3054.07	3044.2	2943.8	2934.07	2672.17	3091.02
ENSMUSG00000035759.3	chr10	111298679	111301736	Bbs10	protein_coding	KNOWN	3058	223.754	-1.02093	-1.07331	0.165436	-6.17114	6.78012e-10	7.91302e-09	331.936	296.91	329.92	174.336	155.772	141.639	135.764
ENSMUSG00000035773.5	chr10	79916971	79922273	Kiss1r	protein_coding	KNOWN	5303	366.76	0.146532	0.18666	0.135959	1.07776	0.28114	0.393728	350.257	365.278	304.255	349.918	353.155	409.741	434.718
ENSMUSG00000035781.13	chr10	79910053	79917006	R3hdm4	protein_coding	KNOWN	6954	14234	0.228832	0.229808	0.0930898	2.45818	0.0139643	0.0330763	13238.6	12549.3	13078.8	14080.2	14355.6	14947.9	17387.4
ENSMUSG00000035798.13	chr10	110941782	111010066	Zdhhc17	protein_coding	KNOWN	68285	7157.01	-0.210077	-0.219631	0.0888229	-2.36512	0.0180242	0.0410621	7691.64	7740.17	7923.87	7373.19	6625.65	6266.25	6478.26
ENSMUSG00000035835.14	chr10	79860475	79874634	Plppr3	protein_coding	KNOWN	14160	2134.32	0.183676	0.18471	0.106025	1.73238	0.0832057	0.148524	1985.15	1938.71	2015.53	1889.06	2207.48	2449.59	2454.72
ENSMUSG00000035852.10	chr10	79821021	79830452	Misp	protein_coding	KNOWN	9432	39.1206	0.321878	0.382975	0.294256	1.09387	0.274012	0.385827	28.0206	32.2304	39.7394	31.1315	41.6104	53.1145	47.9973
ENSMUSG00000035863.13	chr10	79793572	79820896	Palm	protein_coding	KNOWN	27325	13578.9	0.0132041	0.0263769	0.0988651	0.133557	0.893753	0.927815	12925	14300.5	13086.3	13158.7	12983.5	13465.8	15132.9
ENSMUSG00000035864.14	chr10	108497650	109010982	Syt1	protein_coding	KNOWN	513333	80094.9	-0.0267644	-0.0327265	0.0826648	-0.32377	0.746112	0.817294	81359.9	80007.5	82037.1	76381.8	83210.1	76118.2	81550.1
ENSMUSG00000035873.7	chr10	108332189	108414391	Pawr	protein_coding	KNOWN	82203	88.5789	0.424023	0.467222	0.207626	2.04225	0.0411271	0.0825565	81.9063	73.2508	62.9207	97.1303	91.7562	107.494	105.594
ENSMUSG00000035890.8	chr10	79758515	79766952	Rnf126	protein_coding	KNOWN	8438	2759.26	0.130834	0.142399	0.096078	1.36175	0.173278	0.268488	2627.47	2632.15	2554.91	2931.34	3051.43	2577.32	2940.18
ENSMUSG00000036009.16	chr10	105763189	105841380	Mettl25	protein_coding	KNOWN	78192	305.442	0.0193218	0.0355414	0.13326	0.144993	0.884716	0.922346	312.537	305.7	285.213	298.862	307.277	319.952	308.554
ENSMUSG00000036019.8	chr10	105187663	105574451	Tmtc2	protein_coding	KNOWN	386789	890.025	0.245577	0.240595	0.109646	2.23973	0.0251086	0.054445	793.197	798.922	827.077	937.681	1066.93	890.301	916.062
ENSMUSG00000036099.16	chr10	93939165	94035817	Vezt	protein_coding	KNOWN	96653	5458.5	-0.297211	-0.280221	0.101787	-2.91994	0.00350098	0.0100957	6066.45	6256.6	5889.71	5897.55	5238.64	4384.48	4476.09
ENSMUSG00000036112.14	chr10	93858489	93897093	Metap2	protein_coding	KNOWN	38605	6837.68	0.192969	0.195633	0.0764775	2.52321	0.0116289	0.0282892	6352.05	6282.97	6306.15	7056.89	7094.04	7498	7273.64
ENSMUSG00000036168.15	chr10	93540632	93584327	Ccdc38	protein_coding	KNOWN	43696	42.5513	0.46423	0.537332	0.284509	1.63169	0.102745	0.176664	31.2537	37.1138	33.1162	58.5272	49.0789	53.1145	35.6551
ENSMUSG00000036446.4	chr10	97565501	97572703	Lum	protein_coding	KNOWN	7203	473.318	0.0899585	0.088217	0.1221	0.736757	0.46127	0.575672	410.609	500.059	459.901	496.859	503.592	454.003	488.201
ENSMUSG00000036478.7	chr10	96617001	96622813	Btg1	protein_coding	KNOWN	5813	4753.64	1.04373	1.34612	0.335941	3.1069	0.00189063	0.00593332	2382.83	2842.13	2355.39	3135.57	4799.06	7424.65	10335.9
ENSMUSG00000036499.8	chr10	95940663	96045518	Eea1	protein_coding	KNOWN	104856	5434.17	-0.038501	-0.0279361	0.0968098	-0.397697	0.690853	0.773972	5455.39	5614.92	5412.84	6122.95	5530.98	5172.34	4729.79
ENSMUSG00000036676.14	chr10	100443902	100487350	Tmtc3	protein_coding	KNOWN	43449	1315.26	-0.46543	-0.458686	0.151629	-3.06954	0.00214386	0.00663048	1540.05	1604.68	1528.31	1564.05	1123.48	872.596	973.659
ENSMUSG00000036764.11	chr10	63382443	63408840	Dnajc12	protein_coding	KNOWN	26398	453.055	-0.0621942	-0.0546063	0.147457	-0.42178	0.673186	0.759425	439.707	501.036	447.896	443.313	429.974	386.977	522.485
ENSMUSG00000036875.15	chr10	62947026	62974185	Dna2	protein_coding	KNOWN	27160	114.012	-0.741573	-0.783555	0.196777	-3.76859	0.00016417	0.000678695	141.181	164.082	144.469	79.6967	89.6224	88.5242	90.5091
ENSMUSG00000036923.12	chr10	62659043	62726128	Stox1	protein_coding	KNOWN	67086	133.648	-0.409926	-0.434217	0.180783	-2.2675	0.0233597	0.0512379	154.113	158.222	158.544	118.3	124.831	104.964	116.565
ENSMUSG00000036955.16	chr10	62538626	62578457	Kif1bp	protein_coding	KNOWN	39832	9372.6	-0.262875	-0.264296	0.096385	-2.72734	0.0063847	0.0169544	10381.6	10387.9	10322.3	8671.99	9013.45	7699.08	9131.82
ENSMUSG00000037012.18	chr10	62268855	62379908	Hk1	protein_coding	KNOWN	111054	19531.1	-0.08971	-0.106379	0.0896853	-1.00028	0.317177	0.432411	21020.8	19083.3	20970	17226.9	19732.9	18955.6	19728.2
ENSMUSG00000037031.9	chr10	62185396	62231218	Tspan15	protein_coding	KNOWN	45823	1239.59	0.124803	0.146799	0.113018	1.10428	0.26947	0.38081	1133.76	1246.24	1124.29	1216.62	1167.22	1417.65	1371.35
ENSMUSG00000037151.7	chr10	61475833	61582226	Lrrc20	protein_coding	KNOWN	106394	1507.81	-0.428551	-0.414804	0.0951348	-4.50467	6.64758e-06	3.77999e-05	1760.98	1830.29	1685.61	1408.39	1323	1221.63	1324.72
ENSMUSG00000037370.13	chr10	24637914	24712159	Enpp1	protein_coding	KNOWN	74246	257.929	0.161721	0.170295	0.161039	1.00423	0.315266	0.430673	259.729	222.683	239.678	282.674	309.411	255.456	235.872
ENSMUSG00000037455.16	chr10	23796986	23827968	Slc18b1	protein_coding	KNOWN	30983	1576.12	-0.286995	-0.295132	0.0882037	-3.25377	0.00113883	0.00378693	1795.47	1713.09	1778.75	1412.13	1419.02	1459.38	1455
ENSMUSG00000037490.5	chr10	22645011	22704285	Slc2a12	protein_coding	KNOWN	59275	251.938	-0.416014	-0.465562	0.156215	-2.66309	0.00774258	0.0199907	292.06	271.516	333.646	209.204	247.528	216.252	193.36
ENSMUSG00000037608.15	chr10	20312469	20344613	Bclaf1	protein_coding	KNOWN	32145	13930.4	0.0128434	0.0173582	0.10219	0.125681	0.899984	0.932693	13640.6	14019.2	13844.2	16352.8	13943.7	13415.2	12296.9
ENSMUSG00000037710.8	chr10	71330480	71344954	Cisd1	protein_coding	KNOWN	14475	3838.25	-0.038648	-0.0414827	0.111802	-0.345681	0.729582	0.804633	3825.88	3954.57	3923.85	3764.42	3746	3353.8	4299.18
ENSMUSG00000037747.9	chr10	70557682	70655965	Phyhipl	protein_coding	KNOWN	98284	11583.4	0.362727	0.370575	0.0932632	3.88929	0.000100539	0.000438213	9934.37	9923.05	9910.85	11288.3	12918.4	13459.5	13649.1
ENSMUSG00000037762.6	chr10	70245100	70285968	Slc16a9	protein_coding	KNOWN	40869	53.509	-0.279239	-0.331477	0.278936	-1.00109	0.316784	0.432026	72.2068	45.9039	63.7486	46.0746	59.7482	42.9975	43.8832
ENSMUSG00000037846.18	chr10	67979570	68059740	Rtkn2	protein_coding	KNOWN	80171	117.156	0.19842	0.208766	0.19074	1.04026	0.298219	0.412195	98.072	116.225	108.455	133.243	128.032	127.728	108.337
ENSMUSG00000037855.15	chr10	67886103	67912662	Zfp365	protein_coding	KNOWN	26560	27362.4	0.190355	0.20775	0.0975813	1.95073	0.0510887	0.0990782	23974.8	27212.2	24225.7	31064.3	27269.7	27414.7	30375.4
ENSMUSG00000037868.15	chr10	67535475	67542188	Egr2	protein_coding	KNOWN	6714	9817	1.92083	7.61849	0.418899	4.58542	4.53072e-06	2.66687e-05	79.7508	93.7611	87.7579	1361.07	12722.1	23947.1	30427.5
ENSMUSG00000037876.16	chr10	67096125	67256326	Jmjd1c	protein_coding	KNOWN	160202	24827.3	1.58707	1.66519	0.142907	11.1056	1.17762e-28	8.9002e-27	11092.9	11057	11087.7	25991.1	29964.8	47431.3	37166.3
ENSMUSG00000037990.18	chr10	58813359	59138916	Sh3rf3	protein_coding	KNOWN	325558	2730.6	0.0683384	0.0645519	0.0862712	0.792134	0.428282	0.544409	2724.46	2574.52	2684.07	2780.67	2682.27	2936.47	2731.73
ENSMUSG00000038010.8	chr10	58497970	58576242	Ccdc138	protein_coding	KNOWN	78273	242.268	0.504819	0.538704	0.165822	3.04435	0.00233184	0.00712969	202.61	180.685	194.144	214.185	246.462	362.949	294.84
ENSMUSG00000038039.13	chr10	58255497	58305599	Gcc2	protein_coding	KNOWN	50103	5147.36	-0.54143	-0.543602	0.091929	-5.88966	3.86995e-09	3.9875e-08	6267.98	6286.88	6263.1	4804.21	4439.51	3938.06	4031.77
ENSMUSG00000038122.8	chr10	56014298	56228689	Tbc1d32	protein_coding	KNOWN	214392	1620.35	0.0606471	0.0762723	0.0975409	0.621761	0.534099	0.642787	1592.86	1602.73	1519.2	1686.08	1608.93	1767.95	1564.71
ENSMUSG00000038160.6	chr10	44268358	44364291	Atg5	protein_coding	KNOWN	95934	1435.11	-0.214416	-0.217228	0.115397	-1.85808	0.0631576	0.118441	1500.18	1612.5	1566.4	1499.29	1399.82	1098.96	1368.61
ENSMUSG00000038214.14	chr10	43479140	43515396	Bend3	protein_coding	KNOWN	36257	553.772	-0.114963	-0.142907	0.116444	-0.987285	0.323503	0.438959	593.82	539.126	622.998	539.198	496.124	564.026	521.113
ENSMUSG00000038240.13	chr10	43221486	43464882	Pdss2	protein_coding	KNOWN	243397	760.538	0.114074	0.102941	0.108246	1.05385	0.291954	0.405697	699.436	735.438	754.221	804.438	763.924	744.868	821.439
ENSMUSG00000038248.8	chr10	43002500	43174530	Sobp	protein_coding	KNOWN	172031	5914.82	-0.0452093	-0.0341942	0.08522	-0.530501	0.595765	0.696956	5790.56	6345.48	5849.15	5863.93	5800.91	5673.14	6080.57
ENSMUSG00000038280.12	chr10	42583822	42702459	Ostm1	protein_coding	KNOWN	118638	3116.79	-0.338243	-0.340749	0.0943328	-3.58563	0.000336261	0.00128346	3540.29	3557.06	3530.6	2933.83	2786.83	2552.03	2916.86
ENSMUSG00000038302.14	chr10	42312585	42478565	Lace1	protein_coding	KNOWN	165981	976.475	0.0318429	0.0219281	0.0997841	0.319118	0.749637	0.819773	965.632	947.378	991.002	1002.43	977.311	940.886	1010.69
ENSMUSG00000038332.12	chr10	41810574	41908424	Sesn1	protein_coding	KNOWN	97851	3605.53	-1.02213	-1.01024	0.102161	-10.0051	1.44716e-23	7.9515e-22	4795.83	5672.54	4717.81	2923.87	2446.48	2433.15	2249.01
ENSMUSG00000038417.3	chr10	41188172	41303241	Fig4	protein_coding	KNOWN	115070	2218.48	-0.189117	-0.204791	0.0940452	-2.01091	0.0443346	0.0880977	2449.64	2286.4	2463.84	2004.87	2213.89	2038.59	2072.11
ENSMUSG00000038446.7	chr10	40831626	40883143	Cdc40	protein_coding	KNOWN	51518	4121.83	-0.615986	-0.609538	0.148672	-4.14325	3.42415e-05	0.000166231	5092.2	5159.79	5145.43	4647.31	3560.36	2474.88	2772.87
ENSMUSG00000038481.12	chr10	40349308	40483818	Cdk19	protein_coding	KNOWN	134511	4207.41	-0.0285421	-0.0345274	0.0919157	-0.310525	0.756162	0.824533	4179.37	4300.31	4315.45	4379.58	4054.35	4352.86	3869.95
ENSMUSG00000038510.12	chr10	40223246	40247036	Rpf2	protein_coding	KNOWN	23791	793.026	-0.437277	-0.450508	0.131142	-3.33438	0.000854904	0.00294534	893.425	970.818	945.467	752.137	704.176	550.115	735.044
ENSMUSG00000038583.12	chr10	53337686	53345999	Pln	protein_coding	KNOWN	8314	57.4148	0.50959	0.595811	0.276059	1.84594	0.0649003	0.12098	49.5748	46.8805	36.8418	74.7156	98.1578	51.8499	43.8832
ENSMUSG00000038587.8	chr10	4266329	4359468	Akap12	protein_coding	KNOWN	93140	1369.01	0.890672	0.936314	0.144919	6.14598	7.9471e-10	9.15151e-09	936.533	885.847	875.923	1346.13	1663.35	2228.28	1646.99
ENSMUSG00000038594.8	chr10	53278081	53379851	Cep85l	protein_coding	KNOWN	101771	1154.06	0.288124	0.304547	0.124001	2.32355	0.0201495	0.0452046	1000.12	1063.6	988.518	1332.43	1207.77	1401.21	1084.74
ENSMUSG00000038602.7	chr10	52690533	53111622	Slc35f1	protein_coding	KNOWN	421090	2239.47	0.0497371	0.0753445	0.100961	0.492635	0.62227	0.71897	2049.81	2436.81	2032.09	2186.68	2462.48	2200.46	2307.98
ENSMUSG00000038774.8	chr10	50592669	50851202	Ascc3	protein_coding	KNOWN	258534	2049.3	0.0177453	0.0321703	0.0921447	0.19258	0.847288	0.894455	1982.99	2126.23	1960.48	2165.51	2005.83	2116.99	1987.09
ENSMUSG00000038822.15	chr10	45577829	45712345	Hace1	protein_coding	KNOWN	134517	5671.71	-0.282862	-0.284896	0.104927	-2.6958	0.00702201	0.0183926	6234.58	6427.52	6294.14	4929.99	5055.13	5919.74	4840.87
ENSMUSG00000038876.11	chr10	29344178	29362442	Rnf146	protein_coding	KNOWN	18265	2961.56	-0.120535	-0.111433	0.118516	-1.01703	0.309137	0.423995	3048.85	3168.34	3061.59	3455.6	2914.86	2330.72	2750.93
ENSMUSG00000038916.6	chr10	29143996	29199630	Soga3	protein_coding	KNOWN	55635	5167.9	-0.0319106	-0.0371046	0.0803775	-0.397009	0.691361	0.774374	5180.57	5248.67	5302.73	5023.38	4887.62	5244.43	5287.93
ENSMUSG00000039031.15	chr10	26753421	26918648	Arhgap18	protein_coding	KNOWN	165228	470.601	0.216902	0.239314	0.128878	1.683	0.0923744	0.162048	405.22	469.782	404.845	510.557	472.651	537.468	493.686
ENSMUSG00000039089.14	chr10	26274468	26375185	L3mbtl3	protein_coding	KNOWN	100718	1138.14	-0.282381	-0.303337	0.0955831	-2.9543	0.00313378	0.0091883	1319.12	1190.57	1319.68	997.454	1026.39	1066.08	1047.71
ENSMUSG00000039116.5	chr10	14402583	14545179	Adgrg6	protein_coding	KNOWN	142597	100.825	0.0790172	0.0848263	0.213924	0.369371	0.711852	0.790939	109.927	88.8777	93.5532	99.6208	118.43	106.229	89.1378
ENSMUSG00000039166.15	chr10	25169090	25307870	Akap7	protein_coding	KNOWN	138781	2019.28	-0.863476	-0.863261	0.0954697	-9.0445	1.50348e-19	5.91104e-18	2697.52	2801.11	2657.99	1425.82	1425.42	1619.99	1507.11
ENSMUSG00000039462.4	chr10	34389981	34397085	Col10a1	protein_coding	KNOWN	7105	376.042	1.82326	6.20877	0.418955	4.35192	1.34952e-05	7.21026e-05	10.7771	4.88339	10.7628	23.6599	224.056	1453.06	905.091
ENSMUSG00000039480.13	chr10	34288288	34418552	Nt5dc1	protein_coding	KNOWN	130265	144.634	-0.0670612	-0.0490258	0.200162	-0.335035	0.737598	0.810738	151.958	156.268	134.121	124.526	117.363	189.695	138.506
ENSMUSG00000039485.7	chr10	34297442	34301320	Tspyl4	protein_coding	KNOWN	3879	20525.6	-0.126183	-0.129634	0.081696	-1.54455	0.122456	0.203319	21585.5	21494.7	21676.6	18944.1	20502.2	19104.8	20371.4
ENSMUSG00000039497.7	chr10	34151394	34207551	Dse	protein_coding	KNOWN	56158	397.511	-0.520305	-0.531509	0.175893	-2.95808	0.00309565	0.00909362	496.826	476.619	473.975	455.765	315.812	260.514	303.068
ENSMUSG00000039531.7	chr10	33926936	33951212	Zufsp	protein_coding	KNOWN	24277	628.188	-0.215523	-0.216363	0.118639	-1.81663	0.0692736	0.127545	646.628	717.858	683.021	694.855	601.75	536.204	516.999
ENSMUSG00000039552.13	chr10	33905111	33916021	Rsph4a	protein_coding	KNOWN	10911	92.7676	-0.21488	-0.226851	0.216172	-0.994022	0.320212	0.435595	104.538	102.551	96.4509	99.6208	91.7562	87.2596	67.1962
ENSMUSG00000039697.15	chr10	30645584	30803107	Ncoa7	protein_coding	KNOWN	157524	4069.22	-0.0890402	-0.0923414	0.0888704	-1.00191	0.316387	0.431749	4333.49	4076.65	4245.91	4108.11	4101.29	3723.08	3896.01
ENSMUSG00000039810.11	chr10	128541963	128547774	Zc3h10	protein_coding	KNOWN	5812	421.475	-0.0900381	-0.0904577	0.12582	-0.715608	0.474233	0.587939	436.474	437.552	435.892	453.275	413.97	393.3	379.864
ENSMUSG00000039824.3	chr10	128494157	128498685	Myl6b	protein_coding	KNOWN	4529	412.446	0.165674	0.17785	0.133278	1.24308	0.21384	0.317437	379.355	394.578	377.111	384.785	437.443	432.504	481.344
ENSMUSG00000039835.16	chr10	18318985	18533892	Nhsl1	protein_coding	KNOWN	214908	4118.07	-0.634282	-0.650658	0.0842217	-7.5311	5.0313e-14	1.05569e-12	5212.9	5080.68	5294.04	3338.54	3291.49	3165.37	3443.46
ENSMUSG00000039879.8	chr10	17900466	17948067	Heca	protein_coding	KNOWN	47602	4422.97	1.53906	1.62113	0.141586	10.8701	1.60034e-27	1.10736e-25	2039.03	2027.58	2002.29	4423.16	5338.93	8031.67	7098.11
ENSMUSG00000039891.6	chr10	17796226	17845665	Txlnb	protein_coding	KNOWN	49440	53.3111	0.198591	0.228113	0.257006	0.77271	0.439694	0.555109	45.264	58.6007	41.8092	54.7915	54.4136	60.7023	57.5967
ENSMUSG00000039910.9	chr10	17723228	17725673	Cited2	protein_coding	KNOWN	2446	2812.92	1.17492	1.2726	0.176314	6.66381	2.66826e-11	3.92277e-10	1563.76	1537.29	1563.5	2212.83	3279.75	4326.3	5207.02
ENSMUSG00000039914.5	chr10	128363097	128370032	Coq10a	protein_coding	KNOWN	6936	1415.8	0.0311448	0.0430492	0.105177	0.296117	0.76714	0.833469	1332.05	1492.36	1350.73	1410.88	1521.45	1298.78	1504.37
ENSMUSG00000039994.15	chr10	128232065	128252941	Timeless	protein_coding	KNOWN	20877	224.806	-0.144148	-0.158028	0.149059	-0.967055	0.333517	0.449763	245.719	223.659	247.543	202.977	200.583	236.486	216.673
ENSMUSG00000040006.13	chr10	7767947	7792824	Ginm1	protein_coding	KNOWN	24878	726.043	0.0508904	0.0528328	0.114583	0.444136	0.656944	0.746229	733.923	687.581	711.17	774.552	777.794	667.725	729.558
ENSMUSG00000040009.5	chr10	74967177	75016907	Gnaz	protein_coding	KNOWN	49731	3305.15	-0.541526	-0.553954	0.117028	-4.62732	3.70427e-06	2.21815e-05	3959.52	4091.3	4073.7	2958.74	2873.25	2243.46	2936.06
ENSMUSG00000040021.12	chr10	7681209	7716458	Lats1	protein_coding	KNOWN	35250	5718.61	0.499024	0.512773	0.0992798	5.02644	4.99676e-07	3.59162e-06	4561.96	4676.33	4553.89	7396.85	6460.28	6528.03	5852.92
ENSMUSG00000040033.15	chr10	128270576	128292849	Stat2	protein_coding	KNOWN	22274	1379.82	-0.530923	-0.550506	0.095949	-5.53339	3.14103e-08	2.79284e-07	1668.3	1659.38	1728.25	1139.41	1209.9	1165.99	1087.48
ENSMUSG00000040034.15	chr10	7667503	7678881	Nup43	protein_coding	KNOWN	11379	198.38	-0.430244	-0.440193	0.166772	-2.57984	0.00988457	0.0246653	226.32	245.146	228.916	210.449	177.111	141.639	159.077
ENSMUSG00000040043.15	chr10	128129470	128180297	Rbms2	protein_coding	KNOWN	50828	1063.7	0.660873	0.636259	0.0995873	6.63611	3.22061e-11	4.64275e-10	840.617	716.882	865.988	1226.58	1218.44	1308.89	1268.5
ENSMUSG00000040054.15	chr10	128092783	128129303	Baz2a	protein_coding	KNOWN	36521	5775.76	-0.133068	-0.136525	0.0902377	-1.47464	0.140309	0.226746	6007.18	6129.63	6133.12	5897.55	5739.03	5573.23	4950.58
ENSMUSG00000040195.11	chr10	127666901	127701049	Tmem194	protein_coding	KNOWN	34149	495.266	-0.0108505	-0.0220934	0.125919	-0.08617	0.931331	0.954757	517.303	464.899	516.612	432.105	481.187	566.555	488.201
ENSMUSG00000040249.15	chr10	127538161	127621148	Lrp1	protein_coding	KNOWN	82988	27945.4	0.0233741	0.0181818	0.101528	0.230224	0.817918	0.872801	28385.9	26570.5	28276.7	25012.3	27078.8	32943.6	27350.2
ENSMUSG00000040258.6	chr10	127525473	127534559	Nxph4	protein_coding	KNOWN	9087	51.9722	0.366086	0.416533	0.270164	1.35505	0.1754	0.271075	38.7977	41.9971	50.0882	43.5841	59.7482	56.9084	72.6816
ENSMUSG00000040280.9	chr10	127514939	127517152	Ndufa4l2	protein_coding	KNOWN	2214	82.0975	0.281027	0.308752	0.217284	1.29336	0.195886	0.296409	71.1291	78.1342	67.4742	87.1682	99.2248	79.6718	91.8805
ENSMUSG00000040287.9	chr10	127501686	127508823	Stac3	protein_coding	KNOWN	7138	119.297	0.162291	0.167989	0.225375	0.720092	0.471468	0.585762	122.859	91.8077	119.632	80.9419	134.434	160.608	124.793
ENSMUSG00000040354.14	chr10	127296221	127311786	Mars	protein_coding	KNOWN	15566	3142.5	0.0859003	0.0610566	0.087546	0.981202	0.326493	0.442208	3118.9	2855.81	3225.52	2908.93	3194.4	3408.18	3285.76
ENSMUSG00000040415.15	chr10	127190378	127195728	Dtx3	protein_coding	KNOWN	5351	11286.2	0.194701	0.173631	0.0795503	2.44752	0.0143841	0.0339519	10747	9834.17	10971.4	11016.8	11679.7	12727.3	12026.7
ENSMUSG00000040441.8	chr10	127172426	127180645	Slc26a10	protein_coding	KNOWN	8220	861.267	-0.0561582	-0.0697979	0.101812	-0.551587	0.581231	0.684922	933.3	810.643	911.523	790.74	779.928	933.298	869.436
ENSMUSG00000040462.12	chr10	127094259	127121160	Os9	protein_coding	KNOWN	26902	7245.87	0.141186	0.141644	0.0964203	1.46427	0.143119	0.230402	6834.86	6790.84	6901.83	6657.16	7575.22	8303.57	7657.62
ENSMUSG00000040502.5	chr10	127055011	127060184	March9	protein_coding	KNOWN	5174	1049.37	-0.270674	-0.262526	0.124891	-2.16728	0.0302133	0.0634347	1077.71	1292.14	1108.98	1070.92	996.515	779.013	1020.28
ENSMUSG00000040521.11	chr10	127011572	127030840	Tsfm	protein_coding	KNOWN	19269	669.712	-0.453585	-0.448956	0.123407	-3.67551	0.000237374	0.000943255	797.508	816.503	757.533	592.744	613.486	494.471	615.736
ENSMUSG00000040540.5	chr10	130412499	130413312	Gm9770	pseudogene	KNOWN	814	185.8	0.272532	0.288935	0.161059	1.69212	0.0906224	0.15937	142.258	191.429	161.027	234.109	214.454	185.901	171.419
ENSMUSG00000040624.17	chr10	3740364	3967303	Plekhg1	protein_coding	KNOWN	226940	1109.92	0.354151	0.333781	0.109015	3.24864	0.00115959	0.00384611	1017.36	857.523	1023.7	1275.15	1106.41	1231.75	1257.53
ENSMUSG00000040653.5	chr10	3366150	3464975	Ppp1r14c	protein_coding	KNOWN	98826	1210.68	-0.162724	-0.149587	0.112164	-1.45076	0.146846	0.235356	1265.24	1355.63	1227.78	1100.81	1229.11	1049.64	1246.56
ENSMUSG00000040675.17	chr10	3973118	4167081	Mthfd1l	protein_coding	KNOWN	193964	870.821	0.0302385	0.0347291	0.136643	0.221296	0.824862	0.878224	810.441	920.031	846.118	785.759	980.511	776.484	976.402
ENSMUSG00000042570.14	chr10	79540245	79555199	Mier2	protein_coding	KNOWN	14955	2030.99	-0.280495	-0.278417	0.0913592	-3.07024	0.00213888	0.00661899	2240.57	2288.36	2243.21	2018.57	1953.55	1750.25	1722.42
ENSMUSG00000042846.8	chr10	63928472	64090277	Lrrtm3	protein_coding	KNOWN	161806	973.398	-0.252576	-0.257865	0.111897	-2.25723	0.0239939	0.0524066	1035.68	1112.44	1073.38	904.059	902.625	973.766	811.839
ENSMUSG00000043259.14	chr10	70440668	70558731	Fam13c	protein_coding	KNOWN	118064	5661.52	0.0939478	0.104336	0.0915602	1.02608	0.304855	0.419488	5399.35	5507.49	5379.72	5314.77	5463.76	6242.22	6323.3
ENSMUSG00000043670.4	chr10	81019589	81025662	Diras1	protein_coding	KNOWN	6074	4464.96	-0.334356	-0.327177	0.0902988	-3.70277	0.000213257	0.000858156	4866.96	5361.96	4922.72	4075.74	4125.83	3707.9	4193.59
ENSMUSG00000043822.18	chr10	80339110	80348412	Adamtsl5	protein_coding	KNOWN	9303	218.63	-0.0776721	-0.0737725	0.159394	-0.487297	0.626048	0.72208	216.621	235.379	223.12	194.261	199.516	218.781	242.729
ENSMUSG00000044005.13	chr10	128194457	128210004	Gls2	protein_coding	KNOWN	15548	1207.78	0.586484	0.613825	0.149772	3.91585	9.00872e-05	0.00039891	895.58	921.007	964.095	1124.47	1235.51	1894.42	1419.35
ENSMUSG00000044071.7	chr10	123264076	123741204	Fam19a2	protein_coding	KNOWN	477129	7282.58	-0.171799	-0.166749	0.0934414	-1.83858	0.0659774	0.122476	7649.61	7937.46	7714	6628.52	6254.36	7541	7253.07
ENSMUSG00000044475.13	chr10	60002805	60099990	Ascc1	protein_coding	KNOWN	97186	811.527	0.0428536	0.0513752	0.103561	0.413802	0.679019	0.764345	795.353	808.689	781.128	780.778	829.007	840.98	844.752
ENSMUSG00000044499.11	chr10	36506814	36834397	Hs3st5	protein_coding	KNOWN	327584	70.1781	0.185725	0.20146	0.238027	0.780265	0.435235	0.551132	61.4297	65.4374	67.0603	62.263	83.2208	69.5547	82.281
ENSMUSG00000044617.7	chr10	127739538	127747335	Zbtb39	protein_coding	KNOWN	7798	868.512	-0.298335	-0.276822	0.12449	-2.39646	0.0165541	0.0381696	947.311	1039.19	907.797	963.832	847.145	744.868	629.45
ENSMUSG00000044770.14	chr10	42860370	42960780	Scml4	protein_coding	KNOWN	100411	417.314	-0.0629305	-0.0649057	0.177985	-0.353571	0.72366	0.800303	425.697	423.878	434.65	377.314	532.4	303.512	423.747
ENSMUSG00000044921.4	chr10	102512222	102546560	Rassf9	protein_coding	KNOWN	34339	49.1465	0.127723	0.145562	0.265899	0.480345	0.630982	0.725269	47.4194	46.8805	44.7068	57.282	46.9451	56.9084	43.8832
ENSMUSG00000044937.14	chr10	86705811	86776843	Ttc41	protein_coding	KNOWN	71033	166.096	0.377333	0.382128	0.190667	1.97901	0.0478143	0.0939926	142.258	123.061	159.372	166.865	161.107	244.074	165.933
ENSMUSG00000045008.1	chr10	43174704	43176562	9030612E09Rik	protein_coding	KNOWN	1859	67.2224	0.0317987	0.037096	0.241028	0.131929	0.89504	0.92893	60.352	71.2975	67.0603	63.5083	62.949	80.9364	64.4535
ENSMUSG00000045193.13	chr10	80165985	80172786	Cirbp	protein_coding	KNOWN	6802	3279.33	-0.0179268	0.0124457	0.122459	-0.14639	0.883614	0.921926	3033.76	3764.12	2991.63	2925.12	3183.73	3510.62	3546.31
ENSMUSG00000045555.3	chr10	40683282	40811083	Mettl24	protein_coding	KNOWN	127802	125.2	0.0775616	0.0913066	0.182675	0.424589	0.671136	0.757717	116.393	131.852	113.837	138.224	142.969	113.817	119.307
ENSMUSG00000045867.9	chr10	95174746	95324097	Cradd	protein_coding	KNOWN	149352	216.634	-0.0454447	-0.0440534	0.181547	-0.250319	0.802341	0.860306	197.222	250.03	214.013	196.751	235.792	175.784	246.843
ENSMUSG00000045912.8	chr10	79606857	79614025	C2cd4c	protein_coding	KNOWN	7169	1515.7	-0.917633	-0.914713	0.118593	-7.73766	1.01265e-14	2.32879e-13	2056.28	2134.04	2024.23	1318.73	1225.91	966.178	884.521
ENSMUSG00000046463.4	chr10	37139402	37151315	5930403N24Rik	processed_transcript	KNOWN	11914	126.653	0.0122762	0.0177909	0.192859	0.0636536	0.949246	0.966795	129.326	125.015	122.944	144.45	109.894	131.522	123.422
ENSMUSG00000046567.9	chr10	100572274	100589259	4930430F08Rik	protein_coding	KNOWN	16986	801.643	-0.446572	-0.446653	0.118446	-3.77026	0.000163074	0.000674523	885.881	1030.4	920.216	763.345	687.105	603.229	721.33
ENSMUSG00000046807.9	chr10	75550125	75560330	Lrrc75b	protein_coding	KNOWN	10206	1094.67	0.0765757	0.0852097	0.107804	0.710322	0.477505	0.591148	999.041	1136.85	1037.78	1180.51	1078.67	1055.97	1173.88
ENSMUSG00000046822.12	chr10	81028538	81037426	Slc39a3	protein_coding	KNOWN	8889	4366.87	-0.48557	-0.485514	0.0919478	-5.28093	1.2853e-07	1.03469e-06	5338.99	5155.88	5162.4	3944.98	3792.95	3404.39	3768.47
ENSMUSG00000046841.4	chr10	84526305	84534036	Ckap4	protein_coding	KNOWN	7732	1041.77	-0.522594	-0.535507	0.0974909	-5.36044	8.30213e-08	6.94178e-07	1258.77	1257.96	1281.6	894.097	910.094	840.98	848.866
ENSMUSG00000047090.13	chr10	128800036	128804370	Tmem198b	protein_coding	KNOWN	4335	522.927	0.0859694	0.0590964	0.126853	0.67771	0.497956	0.610351	502.215	478.572	551.384	488.142	558.006	582.995	499.172
ENSMUSG00000047139.8	chr10	43579169	43584262	Cd24a	protein_coding	KNOWN	5094	527.62	0.689192	0.689979	0.146435	4.70647	2.52047e-06	1.5634e-05	400.91	350.627	420.576	537.952	683.904	576.672	722.702
ENSMUSG00000047146.15	chr10	62804570	62899118	Tet1	protein_coding	KNOWN	94549	1009.61	-0.776661	-0.805138	0.113536	-6.84067	7.8821e-12	1.24712e-10	1368.7	1263.82	1375.98	784.514	757.522	828.334	688.418
ENSMUSG00000047417.17	chr10	80540922	80561560	Rexo1	protein_coding	KNOWN	20639	3382.96	-0.230897	-0.232752	0.0870395	-2.65278	0.00798313	0.0205166	3656.68	3733.84	3702.8	3423.22	3165.59	2970.62	3027.94
ENSMUSG00000047514.6	chr10	34282190	34285275	Tspyl1	protein_coding	KNOWN	3086	13598.6	0.432167	0.443834	0.094358	4.58008	4.64806e-06	2.73181e-05	11318.2	11170.3	11343.5	13435.1	14005.6	16674.2	17243.4
ENSMUSG00000047648.13	chr10	11281330	11298052	Fbxo30	protein_coding	KNOWN	16723	677.803	0.242542	0.256789	0.113472	2.13745	0.0325613	0.0675654	572.266	662.188	595.263	824.362	719.113	681.636	689.789
ENSMUSG00000047669.7	chr10	56106917	56116880	Msl3l2	protein_coding	KNOWN	9964	557.404	-1.02369	-1.04989	0.127357	-8.03801	9.13078e-16	2.44256e-14	779.187	791.109	803.067	447.048	397.966	335.127	348.323
ENSMUSG00000047712.7	chr10	8204753	8518825	Ust	protein_coding	KNOWN	314073	3741.12	-0.00668464	-0.0166277	0.0833385	-0.0802108	0.93607	0.958164	3761.22	3693.8	3842.3	3520.35	3718.26	3740.78	3911.09
ENSMUSG00000048240.14	chr10	80948624	81014945	Gng7	protein_coding	KNOWN	66322	23714.6	0.32703	0.352536	0.0990751	3.30083	0.000963977	0.00327475	20124.2	21483	19820.4	24120.7	23562.1	28521.2	28370.5
ENSMUSG00000048661.14	chr10	120923413	120979332	Lemd3	protein_coding	KNOWN	55920	7248.37	1.3616	1.61551	0.279506	4.87146	1.10778e-06	7.39579e-06	3352.77	3332.42	3291.75	5608.65	6685.4	15555	12912.6
ENSMUSG00000048696.10	chr10	80380355	80387659	Mex3d	protein_coding	KNOWN	7305	872.8	0.287205	0.304254	0.105976	2.71009	0.00672656	0.0177622	714.524	850.686	743.458	961.341	970.909	915.593	953.089
ENSMUSG00000048701.13	chr10	70097121	70193200	Ccdc6	protein_coding	KNOWN	96080	4513.17	-0.0249684	-0.0198908	0.0870674	-0.286771	0.774288	0.838951	4407.85	4732.98	4505.46	4284.94	4429.91	4576.7	4654.36
ENSMUSG00000048756.11	chr10	42181841	42276755	Foxo3	protein_coding	KNOWN	94915	7928.02	0.821554	0.881529	0.138816	5.91829	3.25302e-09	3.38998e-08	5169.79	5706.73	5179.37	7731.82	8237.79	12253	11217.6
ENSMUSG00000049038.2	chr10	85119435	85128027	Mterf2	protein_coding	KNOWN	8593	783.414	-0.170771	-0.164991	0.115578	-1.47754	0.139532	0.225639	843.85	838.966	822.109	648.781	734.05	765.102	831.038
ENSMUSG00000049420.8	chr10	25991186	26079052	Tmem200a	protein_coding	KNOWN	87867	645.449	-0.14655	-0.130171	0.137127	-1.06872	0.285195	0.398118	645.551	716.882	674.328	762.099	723.381	451.473	544.426
ENSMUSG00000049422.6	chr10	75935573	75937725	Chchd10	protein_coding	KNOWN	2153	4149.23	0.200828	0.204995	0.102228	1.96452	0.0494698	0.0965884	3776.31	3850.06	3822.44	3991.06	4419.24	4255.48	4930
ENSMUSG00000049764.7	chr10	76032654	76043234	Zfp280b	protein_coding	KNOWN	10581	1106.01	-1.38413	-1.41	0.165125	-8.38227	5.19151e-17	1.6037e-15	1734.04	1725.79	1695.55	917.757	699.908	509.646	459.402
ENSMUSG00000049858.7	chr10	128669887	128673918	Suox	protein_coding	KNOWN	4032	645.318	-0.424152	-0.437578	0.125148	-3.3892	0.000700967	0.00247796	700.514	808.689	767.054	509.311	562.274	605.758	563.625
ENSMUSG00000049872.7	chr10	34091352	34096519	Fam26e	protein_coding	KNOWN	5168	327.13	-0.23827	-0.239887	0.150087	-1.58755	0.112388	0.189821	371.811	350.627	353.101	334.975	324.348	247.868	307.183
ENSMUSG00000050035.6	chr10	85097019	85102495	Fhl4	protein_coding	KNOWN	5477	49.9777	-0.913254	-1.02941	0.264705	-3.45008	0.000560419	0.00202112	65.7406	77.1576	68.7161	39.8483	36.2757	27.8219	34.2838
ENSMUSG00000050663.7	chr10	114398823	114802307	Trhde	protein_coding	KNOWN	403485	4045.35	-0.00651353	-0.0284349	0.0980507	-0.0664303	0.947035	0.96501	4210.63	3772.91	4289.37	4095.66	4229.32	3702.84	4016.69
ENSMUSG00000050953.9	chr10	56377300	56390419	Gja1	protein_coding	KNOWN	13120	19767.8	0.347246	0.362087	0.0752183	4.61652	3.90236e-06	2.32514e-05	17090.4	17257.9	16642.5	21317.6	21127.4	22384	22554.6
ENSMUSG00000051067.7	chr10	80832807	80844039	Lingo3	protein_coding	KNOWN	11233	3154.43	0.0448484	0.0658742	0.166296	0.26969	0.787399	0.848962	3266.55	2794.28	3156.39	4439.35	3337.37	2624.11	2462.95
ENSMUSG00000051236.13	chr10	120781096	120899101	Msrb3	protein_coding	KNOWN	118006	297.537	0.394416	0.395345	0.144301	2.73329	0.00627058	0.0167055	266.195	228.543	261.618	308.825	325.415	378.125	314.039
ENSMUSG00000051346.8	chr10	128209908	128211794	Spryd4	protein_coding	KNOWN	1887	338.661	-0.0396772	-0.045518	0.163073	-0.243309	0.807766	0.864457	353.49	328.164	352.687	407.2	295.54	341.45	292.098
ENSMUSG00000051652.4	chr10	77897575	77902536	Lrrc3	protein_coding	KNOWN	4962	330.035	-0.160307	-0.168483	0.147511	-1.08675	0.277147	0.389362	333.014	367.231	356.413	312.56	355.289	257.985	327.753
ENSMUSG00000051736.8	chr10	39118804	39133914	Fam229b	protein_coding	KNOWN	15111	604.759	-0.188078	-0.187696	0.112112	-1.67759	0.0934278	0.163436	667.105	637.771	645.352	536.707	554.805	570.349	621.222
ENSMUSG00000052151.11	chr10	79526430	79533787	Plpp2	protein_coding	KNOWN	7358	145.884	0.367565	0.387707	0.17222	2.13427	0.0328205	0.0680583	126.093	123.061	122.944	160.639	157.906	161.873	168.676
ENSMUSG00000052291.7	chr10	116581281	116583515	5330438D12Rik	pseudogene	KNOWN	2235	357.418	-0.492244	-0.504109	0.132992	-3.70131	0.000214485	0.00086265	434.319	426.808	428.441	321.277	314.745	271.896	304.44
ENSMUSG00000052302.5	chr10	121263824	121311189	Tbc1d30	protein_coding	KNOWN	47366	3112.83	-0.791081	-0.798647	0.0867487	-9.11922	7.56645e-20	3.08382e-18	4068.37	4162.6	4103.92	2464.37	2421.94	2381.3	2187.3
ENSMUSG00000052613.16	chr10	73099342	74649737	Pcdh15	protein_coding	KNOWN	1550396	1360.64	0.138864	0.146698	0.111505	1.24536	0.213001	0.316435	1251.23	1331.21	1264.21	1450.73	1463.83	1527.67	1235.59
ENSMUSG00000052681.7	chr10	117814471	117845935	Rap1b	protein_coding	KNOWN	31465	6204.39	1.11713	1.15204	0.112479	9.93192	3.02366e-23	1.61771e-21	3586.63	3729.93	3642.37	6708.22	7517.61	9196.4	9049.54
ENSMUSG00000052798.12	chr10	117750624	117792705	Nup107	protein_coding	KNOWN	42082	850.859	-0.57043	-0.579254	0.101496	-5.62022	1.90717e-08	1.75593e-07	1003.35	1095.83	1048.13	714.779	719.113	674.049	700.76
ENSMUSG00000053329.6	chr10	78162067	78169768	D10Jhu81e	protein_coding	KNOWN	7702	3417.33	-0.137311	-0.126748	0.0959583	-1.43094	0.152446	0.242212	3525.2	3754.35	3490.03	3327.34	3397.11	2960.5	3466.77
ENSMUSG00000053684.8	chr10	121739937	121752878	BC048403	protein_coding	KNOWN	12942	455.522	-0.720563	-0.75716	0.150881	-4.77572	1.7907e-06	1.14777e-05	595.976	560.613	625.896	438.332	332.883	308.57	326.381
ENSMUSG00000053825.14	chr10	106470310	106933467	Ppfia2	protein_coding	KNOWN	463158	21878.2	-0.111416	-0.101789	0.0894813	-1.24513	0.213084	0.316516	22454.2	23606.3	22232.5	21584.1	20736.9	22692.5	19840.7
ENSMUSG00000054027.7	chr10	86779005	86838389	Nt5dc3	protein_coding	KNOWN	59385	27463.9	0.599313	0.591829	0.0882006	6.79489	1.08398e-11	1.67193e-10	21970.3	20009.2	21899.7	29242.4	32735.6	34548.5	31841.4
ENSMUSG00000054206.2	chr10	79689020	79695261	Gzmm	protein_coding	KNOWN	6242	106.542	-0.367583	-0.392112	0.208248	-1.76511	0.0775445	0.139976	128.248	119.155	122.53	107.092	98.1578	74.6133	95.9945
ENSMUSG00000054452.9	chr10	81559494	81566362	Aes	protein_coding	KNOWN	6869	21293.5	0.240462	0.248496	0.110935	2.1676	0.0301894	0.0633961	19040	19433	19211.5	20916.6	21880.7	21525.3	27047.1
ENSMUSG00000054708.17	chr10	81628540	81647610	Ankrd24	protein_coding	KNOWN	19071	1870.71	-0.148772	-0.151018	0.100833	-1.47544	0.140095	0.22647	2021.79	1947.5	1980.76	1663.67	1943.95	1764.16	1773.16
ENSMUSG00000054934.10	chr10	116417861	116473878	Kcnmb4	protein_coding	KNOWN	56018	276.011	1.08702	1.10909	0.149642	7.26416	3.75373e-13	7.12705e-12	158.424	153.338	186.692	303.844	306.21	413.534	410.034
ENSMUSG00000055053.17	chr10	81396186	81431005	Nfic	protein_coding	KNOWN	34820	4159.39	-0.164602	-0.169105	0.0926881	-1.77587	0.0757544	0.137269	4398.15	4456.58	4465.3	4145.47	3895.37	3625.7	4129.14
ENSMUSG00000055493.4	chr10	11343404	11459644	Epm2a	protein_coding	KNOWN	116241	2318.39	-0.271104	-0.266194	0.107134	-2.5305	0.0113898	0.0278075	2477.66	2716.14	2502.34	2074.6	2180.81	1934.89	2342.27
ENSMUSG00000055531.12	chr10	117344673	117380015	Cpsf6	protein_coding	KNOWN	35343	15912.8	0.560948	0.587213	0.116455	4.81688	1.45824e-06	9.50724e-06	12252.5	12726.1	12112.7	16946.7	16693.2	22581.3	18077.1
ENSMUSG00000055862.6	chr10	80702693	80705382	Izumo4	protein_coding	KNOWN	2690	1089.65	0.0517688	0.0667377	0.106112	0.487868	0.625644	0.72169	1070.17	1086.07	1026.6	1013.64	1136.28	1098.96	1195.82
ENSMUSG00000055958.3	chr10	58812574	58813142	Gm9987	pseudogene	KNOWN	569	207.686	-0.0033009	-0.000937034	0.179097	-0.0184307	0.985295	0.990001	206.921	206.079	210.288	217.921	163.241	249.132	200.217
ENSMUSG00000056073.14	chr10	49099460	49788766	Grik2	protein_coding	KNOWN	689307	10118.6	0.211489	0.223501	0.0952805	2.21965	0.0264428	0.0567846	9141.17	9506.01	9056.03	10882.3	10275.6	11814.2	10154.9
ENSMUSG00000056316.2	chr10	29143282	29144194	Gm9996	protein_coding	KNOWN	913	59.839	-0.133796	-0.141924	0.246698	-0.542347	0.587579	0.69026	61.4297	67.3908	60.851	48.5652	55.4805	60.7023	64.4535
ENSMUSG00000056888.11	chr10	111985448	112002631	Glipr1	protein_coding	KNOWN	17184	84.983	0.945829	1.04027	0.238806	3.96066	7.47415e-05	0.000337095	52.808	41.9971	64.1626	82.1872	94.957	102.435	156.334
ENSMUSG00000057134.4	chr10	67544512	67548955	Ado	protein_coding	KNOWN	4444	2552.99	-0.316839	-0.317857	0.0949043	-3.33851	0.000842277	0.00290763	2878.57	2889.01	2867.03	2549.05	2278.97	2152.4	2255.87
ENSMUSG00000057337.13	chr10	60181532	60219260	Chst3	protein_coding	KNOWN	37729	222.382	0.659498	0.700739	0.175898	3.74932	0.000177318	0.000725916	165.968	153.338	172.204	209.204	219.788	359.155	277.013
ENSMUSG00000058297.16	chr10	60106219	60135198	Spock2	protein_coding	KNOWN	28980	46236.1	0.0257693	0.0179131	0.0910991	0.282871	0.777276	0.840842	47491.6	43337.1	46896.2	39865.8	46425.5	49781	49855.4
ENSMUSG00000058298.7	chr10	53536329	53630439	Mcm9	protein_coding	KNOWN	94111	534.061	-0.29403	-0.293525	0.114306	-2.57231	0.0101023	0.0251331	619.686	580.147	590.71	449.539	455.58	529.881	512.885
ENSMUSG00000058396.7	chr10	127747276	127751732	Gpr182	protein_coding	KNOWN	4457	110.659	-0.405951	-0.446766	0.214823	-1.8897	0.0587984	0.111502	134.714	118.178	138.674	95.885	121.63	85.9949	79.5383
ENSMUSG00000058589.14	chr10	89873509	90973300	Anks1b	protein_coding	KNOWN	1099792	20013.9	-0.227465	-0.235365	0.0823861	-2.76096	0.00576314	0.0155433	22077	21478.1	22137.3	18676.4	18880.4	17518.9	19329.2
ENSMUSG00000058799.14	chr10	111473192	111498142	Nap1l1	protein_coding	KNOWN	24951	14027.3	0.41445	0.424778	0.0892316	4.64465	3.40648e-06	2.05564e-05	11625.3	11875.4	11695.4	14239.6	15147.2	16621.1	16986.9
ENSMUSG00000058806.14	chr10	61838236	61979108	Col13a1	protein_coding	KNOWN	140873	135.683	0.352233	0.361104	0.208095	1.69266	0.090521	0.159209	134.714	90.831	124.6	114.564	167.508	169.461	148.106
ENSMUSG00000059406.7	chr10	80879720	80899441	Tmprss9	protein_coding	KNOWN	19722	76.0721	-0.228675	-0.250409	0.230553	-0.991853	0.321269	0.436765	81.9063	75.2042	93.9672	51.0557	61.8821	83.4657	85.0237
ENSMUSG00000059554.12	chr10	18213676	18234998	Ccdc28a	protein_coding	KNOWN	21323	1021.33	-0.430484	-0.426773	0.113332	-3.79842	0.000145621	0.000609453	1209.2	1215.96	1164.03	943.907	933.566	763.837	918.805
ENSMUSG00000059602.14	chr10	86055125	86498896	Syn3	protein_coding	KNOWN	443772	824.451	-0.168564	-0.167369	0.118685	-1.42026	0.155531	0.246113	858.938	910.264	869.3	769.571	752.188	882.713	728.187
ENSMUSG00000059901.12	chr10	61197112	61273438	Adamts14	protein_coding	KNOWN	76327	204.518	-0.0174167	-0.0531642	0.192139	-0.0906462	0.927774	0.952113	216.621	168.965	240.92	164.374	243.261	213.723	183.761
ENSMUSG00000060002.14	chr10	88452745	88504073	Chpt1	protein_coding	KNOWN	51329	4120.26	0.228181	0.2199	0.0829281	2.75155	0.00593133	0.0159325	3766.61	3685.98	3845.2	4485.43	4190.91	4349.07	4518.6
ENSMUSG00000060181.5	chr10	117733679	117746358	Slc35e3	protein_coding	KNOWN	12680	1665.44	-0.283862	-0.280886	0.10756	-2.6391	0.00831262	0.021279	1883.84	1835.18	1839.19	1682.35	1632.41	1317.75	1467.35
ENSMUSG00000060301.5	chr10	79064374	79097600	2610008E11Rik	protein_coding	KNOWN	33227	1972.52	-1.0713	-1.0827	0.152586	-7.02097	2.20331e-12	3.7531e-11	2831.15	2805.02	2837.23	1830.53	1445.69	1077.47	980.516
ENSMUSG00000060487.5	chr10	9627259	9675208	Samd5	protein_coding	KNOWN	47950	440.738	0.316618	0.333076	0.124096	2.5514	0.0107293	0.0264143	367.5	409.228	374.627	541.688	477.986	461.59	452.546
ENSMUSG00000060733.13	chr10	71347763	71433327	Ipmk	protein_coding	KNOWN	85565	4939.73	0.376201	0.388114	0.0878202	4.28376	1.83761e-05	9.52386e-05	4082.38	4365.75	4149.04	5995.93	5655.81	4921.95	5407.23
ENSMUSG00000060843.11	chr10	63430098	65003667	Ctnna3	protein_coding	KNOWN	1573570	58.7111	0.497752	0.557773	0.249542	1.99466	0.0460803	0.0909974	43.1086	48.8339	46.7766	63.5083	61.8821	79.6718	67.1962
ENSMUSG00000060904.14	chr10	88730858	88744094	Arl1	protein_coding	KNOWN	13237	6602.78	0.0171915	0.0309174	0.102388	0.167905	0.866658	0.909477	6396.23	6821.12	6348.79	7252.4	6928.66	5625.08	6847.15
ENSMUSG00000060935.5	chr10	85102627	85117747	Tmem263	protein_coding	KNOWN	15121	4129.32	1.1874	1.20465	0.0960094	12.3675	3.91745e-35	4.26509e-33	2337.56	2387.98	2371.12	5654.73	5819.05	5537.82	4796.98
ENSMUSG00000061032.8	chr10	78400362	78413043	Rrp1	protein_coding	KNOWN	12682	19642.3	0.374959	0.38036	0.0977903	3.83432	0.000125911	0.000537219	16901.8	16484.4	16876.4	18624.1	22030	23123.8	23455.6
ENSMUSG00000061315.13	chr10	128035346	128048637	Naca	protein_coding	KNOWN	13292	10053.7	0.289035	0.301932	0.102966	2.8071	0.00499897	0.0137143	8644.34	9229.61	8745.98	10493.8	10308.7	10517.9	12435.4
ENSMUSG00000061371.7	chr10	82048123	82064745	Zfp873	protein_coding	KNOWN	16623	407.192	-0.872355	-0.904145	0.162098	-5.38164	7.38098e-08	6.20823e-07	560.411	541.08	562.975	387.276	287.005	242.809	268.785
ENSMUSG00000061589.14	chr10	80755206	80795461	Dot1l	protein_coding	KNOWN	40256	22349.2	1.75687	2.0186	0.268225	6.54998	5.75445e-11	7.8796e-10	8259.6	7920.86	8254.21	20524.4	27039.3	51634.9	32810.9
ENSMUSG00000061759.15	chr10	4432467	4455141	Armt1	protein_coding	KNOWN	22675	1304.64	-0.649881	-0.65315	0.0990361	-6.56206	5.307e-11	7.31839e-10	1647.82	1661.33	1633.04	1126.96	1111.74	957.326	994.229
ENSMUSG00000061904.12	chr10	91116574	91124059	Slc25a3	protein_coding	KNOWN	7486	36983.9	1.41418	1.48929	0.146607	9.64605	5.10837e-22	2.4623e-20	18455.9	17831.2	18292.1	33896	46389.2	64473.4	59549.5
ENSMUSG00000061983.6	chr10	23785211	23787195	Rps12	protein_coding	KNOWN	1985	9747.56	0.431183	0.451863	0.110463	3.9034	9.4851e-05	0.000417275	7963.23	8364.27	7836.53	10619.6	10390.9	10230.9	12827.6
ENSMUSG00000062075.13	chr10	80901203	80918245	Lmnb2	protein_coding	KNOWN	17043	1756.34	0.146896	0.15616	0.0891371	1.64797	0.099358	0.17205	1624.11	1697.47	1624.35	1820.57	1799.92	1845.1	1882.86
ENSMUSG00000062561.3	chr10	63924866	63927434	Gm10118	protein_coding	KNOWN	2569	66.4072	-0.675204	-0.742187	0.240566	-2.80673	0.00500474	0.0137253	87.2948	86.9243	84.4463	46.0746	50.1459	61.9669	47.9973
ENSMUSG00000062866.15	chr10	13207717	13474396	Phactr2	protein_coding	KNOWN	266680	1886.45	-0.0232988	-0.0322419	0.102403	-0.22752	0.820019	0.874264	1935.57	1843.97	1952.2	1911.47	1971.69	1673.11	1917.15
ENSMUSG00000062931.15	chr10	82224850	82241280	Zfp938	protein_coding	KNOWN	16431	1104.98	-0.203077	-0.200442	0.0985437	-2.06078	0.0393236	0.0794373	1145.61	1249.17	1185.56	1159.34	1088.27	949.738	957.203
ENSMUSG00000062981.4	chr10	95480806	95501927	Mrpl42	protein_coding	KNOWN	21122	1242.33	0.0503614	0.0482758	0.133586	0.376996	0.706176	0.786517	1189.8	1229.64	1236.48	1221.6	1217.37	1088.85	1512.6
ENSMUSG00000063320.11	chr10	82619851	82623228	1190007I07Rik	protein_coding	KNOWN	3378	182.335	-0.384838	-0.386416	0.177257	-2.17108	0.0299254	0.0628841	205.843	228.543	197.455	164.374	131.233	171.99	176.904
ENSMUSG00000063334.16	chr10	111972664	111988432	Krr1	protein_coding	KNOWN	15769	2029.76	-0.330438	-0.322715	0.114629	-2.88268	0.00394306	0.0111902	2215.78	2416.3	2244.86	2191.66	1878.87	1497.32	1763.56
ENSMUSG00000063428.7	chr10	40630011	40649931	Ddo	protein_coding	KNOWN	19921	884.753	-0.42136	-0.427897	0.103221	-4.0821	4.46305e-05	0.000210881	1049.69	1019.65	1041.09	706.063	744.719	827.069	804.983
ENSMUSG00000063457.14	chr10	80292453	80294114	Rps15	protein_coding	KNOWN	1662	15184	0.459123	0.479126	0.122529	3.74706	0.000178916	0.000731499	11964.8	12954.7	12263.3	15527.2	16105.4	16421.2	21051.6
ENSMUSG00000063760.9	chr10	31493193	31609184	Rnf217	protein_coding	KNOWN	115992	15297.3	2.5473	3.21141	0.324268	7.85553	3.98077e-15	9.7219e-14	2726.62	2630.19	2664.2	10883.6	13422	37516.6	37237.7
ENSMUSG00000063804.7	chr10	45376620	45470201	Lin28b	protein_coding	KNOWN	93582	104.866	-0.00374327	-0.00180425	0.208613	-0.0179436	0.985684	0.990199	98.072	110.365	106.386	114.564	86.4216	111.288	106.965
ENSMUSG00000063953.2	chr10	35708691	35711891	Amd2	protein_coding	KNOWN	3201	535.255	0.573284	0.594747	0.125345	4.57367	4.79264e-06	2.81042e-05	420.308	416.065	406.915	677.422	632.691	548.85	644.535
ENSMUSG00000064030.14	chr10	128747879	128766568	Pym1	protein_coding	KNOWN	18690	766.846	-0.122367	-0.11193	0.131316	-0.931852	0.351413	0.4683	784.576	841.896	776.574	828.098	788.463	581.73	766.585
ENSMUSG00000064065.15	chr10	6885796	7052478	Ipcef1	protein_coding	KNOWN	166683	2941.21	-1.01102	-1.01314	0.129573	-7.80265	6.0621e-15	1.44756e-13	3942.28	4567.92	3887.84	2649.91	1913.01	1898.21	1729.27
ENSMUSG00000064181.5	chr10	116905784	116950380	Rab3ip	protein_coding	KNOWN	44597	3644.61	0.0414203	0.0550316	0.11985	0.3456	0.729643	0.804633	3587.71	3593.2	3515.28	4312.34	3876.17	2959.24	3668.36
ENSMUSG00000069516.7	chr10	117277334	117282274	Lyz2	protein_coding	KNOWN	4941	337.066	0.319715	0.333698	0.188403	1.69697	0.0897022	0.158055	308.226	260.773	311.292	491.878	341.419	357.891	287.984
ENSMUSG00000069520.5	chr10	115340739	115362262	Tmem19	protein_coding	KNOWN	21524	1782.51	-0.312675	-0.320086	0.0942704	-3.31679	0.00091059	0.00311103	2057.36	1952.38	2023.81	1586.46	1693.22	1536.53	1627.79
ENSMUSG00000069539.11	chr10	89638721	89686285	Scyl2	protein_coding	KNOWN	47565	3628.16	0.854241	0.864451	0.103601	8.24547	1.64506e-16	4.82333e-15	2463.65	2452.44	2493.65	4223.92	4582.48	5007.94	4173.02
ENSMUSG00000069565.12	chr10	80261486	80288408	Dazap1	protein_coding	KNOWN	26923	2543.38	0.118823	0.109991	0.0882832	1.34593	0.178325	0.274861	2498.14	2321.56	2479.99	2586.41	2665.2	2712.63	2539.74
ENSMUSG00000069601.13	chr10	69533772	70027438	Ank3	protein_coding	KNOWN	493667	30152.7	-0.224213	-0.240888	0.0934462	-2.39938	0.0164228	0.0379358	34350	30889.4	33933.3	27322.3	28204.4	30285.4	26084.5
ENSMUSG00000069662.5	chr10	37133375	37138920	Marcks	protein_coding	KNOWN	5546	8253.75	-0.126101	-0.139644	0.0871681	-1.44665	0.147996	0.236784	8921.32	8293.95	8923.98	8323.32	7792.88	7981.09	7539.68
ENSMUSG00000069670.7	chr10	31689310	32890462	Nkain2	protein_coding	KNOWN	1201153	5320.38	0.0311376	0.0435693	0.0907168	0.34324	0.731418	0.805449	5138.54	5444.98	5102.79	5274.92	5225.84	5235.57	5820.01
ENSMUSG00000069682.5	chr10	29698746	29699380	Gm10275	transcribed_processed_pseudogene	KNOWN	635	57.7158	-0.0400639	-0.0624272	0.260714	-0.15367	0.87787	0.917705	49.5748	45.9039	81.9625	54.7915	37.3427	64.4962	69.9389
ENSMUSG00000070601.4	chr10	130385316	130394241	Vmn2r84	protein_coding	KNOWN	8926	96.7052	-0.0179441	-0.0251692	0.215826	-0.0831415	0.933739	0.956462	92.6834	97.6678	102.66	108.338	88.5554	107.494	79.5383
ENSMUSG00000071072.12	chr10	128058954	128077272	Ptges3	protein_coding	KNOWN	18319	6580.37	0.598673	0.603181	0.092488	6.47298	9.60894e-11	1.2646e-09	4990.89	5123.65	5110.65	7597.33	7780.08	7157.81	8302.16
ENSMUSG00000071253.8	chr10	62920633	62946498	Slc25a16	protein_coding	KNOWN	25866	2922.65	-0.319305	-0.306097	0.0935567	-3.41296	0.000642622	0.00229367	3198.66	3482.83	3161.77	2820.51	2756.95	2345.89	2691.96
ENSMUSG00000071317.3	chr10	45335762	45369708	Bves	protein_coding	KNOWN	33947	455.831	0.851525	0.885283	0.151089	5.63591	1.74138e-08	1.60995e-07	320.081	290.073	311.292	423.389	575.077	670.255	600.652
ENSMUSG00000071324.11	chr10	41914990	42018442	Armc2	protein_coding	KNOWN	103453	401.488	-0.485074	-0.496522	0.148776	-3.26044	0.00111241	0.00371097	515.147	461.969	467.766	341.201	345.686	392.036	286.612
ENSMUSG00000071359.13	chr10	22703879	22731938	Tbpl1	protein_coding	KNOWN	28060	4256.41	0.123393	0.132131	0.107016	1.15303	0.248897	0.357942	3856.06	4212.41	4037.28	4106.87	3939.12	4894.12	4748.99
ENSMUSG00000071369.10	chr10	19934472	20142753	Map3k5	protein_coding	KNOWN	208282	2653.71	0.0117476	-0.00756112	0.0851589	0.137949	0.890281	0.926028	2722.31	2495.41	2767.27	2506.71	2506.23	2883.36	2694.7
ENSMUSG00000073427.4	chr10	82354255	82422882	Gm4924	protein_coding	KNOWN	68628	532.222	-0.483815	-0.492335	0.117382	-4.12173	3.76039e-05	0.000180696	647.706	629.957	635.003	484.406	436.376	446.415	445.689
ENSMUSG00000074657.4	chr10	127225696	127263363	Kif5a	protein_coding	KNOWN	37668	104989	0.271914	0.283247	0.100428	2.70754	0.00677835	0.0178721	92211.4	95999.6	92017.9	114759	106348	106407	127178
ENSMUSG00000074748.3	chr10	112925430	112929001	Atxn7l3b	protein_coding	KNOWN	3572	11467.5	-0.113834	-0.122918	0.076333	-1.49128	0.135887	0.221023	11820.4	12049.3	12217	11264.6	11352.2	10509.1	11059.9
ENSMUSG00000074781.4	chr10	95515162	95545658	Ube2n	protein_coding	KNOWN	30497	10155.6	0.20753	0.218529	0.0835533	2.4838	0.0129989	0.0311354	9261.87	9476.71	9124.34	10536.1	11034.2	10323.2	11332.8
ENSMUSG00000074785.4	chr10	94790866	94944578	Plxnc1	protein_coding	KNOWN	153713	3919.8	0.029865	0.0269875	0.0822186	0.363239	0.716426	0.794278	3875.46	3856.9	3901.5	3804.27	4036.21	4053.14	3911.09
ENSMUSG00000074802.10	chr10	89408823	89443967	Gas2l3	protein_coding	KNOWN	35145	126.01	-0.581239	-0.620836	0.221947	-2.61882	0.00882339	0.0223914	168.123	155.292	149.023	125.771	81.0869	83.4657	119.307
ENSMUSG00000074862.11	chr10	81606270	81620703	BC025920	protein_coding	KNOWN	14434	85.3701	-0.50615	-0.545257	0.21918	-2.30929	0.0209276	0.0466794	107.771	100.598	103.902	75.9609	59.7482	79.6718	69.9389
ENSMUSG00000075000.11	chr10	67266689	67285305	Nrbf2	protein_coding	KNOWN	18617	905.817	0.14973	0.156471	0.103584	1.44549	0.148322	0.237111	815.829	892.684	841.979	981.265	913.295	937.092	958.574
ENSMUSG00000075232.4	chr10	40287458	40302188	Amd1	protein_coding	KNOWN	14731	8222.7	0.588813	0.609482	0.0833485	7.06447	1.61226e-12	2.79525e-11	6271.22	6524.21	6174.1	10513.7	10031.3	8790.45	9253.87
ENSMUSG00000075266.4	chr10	30196011	30200540	Cenpw	protein_coding	KNOWN	4530	171.603	0.0161722	0.0223913	0.172093	0.0939736	0.92513	0.950277	155.191	189.476	165.581	160.639	177.111	169.461	183.761
ENSMUSG00000075327.9	chr10	4367074	4388108	Zbtb2	protein_coding	KNOWN	21035	1323.26	0.53345	0.547991	0.101502	5.25556	1.47572e-07	1.17222e-06	1008.74	1097.79	1034.05	1610.12	1640.94	1532.73	1338.44
ENSMUSG00000075706.10	chr10	80047166	80056439	Gpx4	protein_coding	KNOWN	9274	7704.03	0.446574	0.477457	0.135689	3.29115	0.000997772	0.00337189	6147.28	6757.63	5974.99	8158.95	8353.02	7656.08	10880.3
ENSMUSG00000077167.1	chr10	91118291	91118536	Gm24119	snoRNA	KNOWN	246	69.5673	1.29769	1.50496	0.265078	4.8955	9.80572e-07	6.5987e-06	34.4868	34.1837	33.1162	58.5272	71.4845	112.552	142.62
ENSMUSG00000077440.1	chr10	23786470	23786543	Gm23130	snoRNA	KNOWN	74	54.6441	0.211608	0.247621	0.278343	0.76024	0.447111	0.56203	42.0308	57.624	48.4324	58.5272	48.012	77.1425	50.74
ENSMUSG00000078348.4	chr10	13005343	13009183	Sf3b5	protein_coding	KNOWN	3841	1027.24	-0.0393991	-0.0312591	0.116645	-0.337768	0.735538	0.809022	1002.27	1099.74	1017.91	1003.68	976.244	948.474	1142.33
ENSMUSG00000078427.2	chr10	128821771	128877638	Sarnp	protein_coding	KNOWN	55868	1724.99	0.208749	0.21943	0.114553	1.82228	0.0684122	0.126183	1534.66	1644.73	1551.49	1921.44	1861.8	1566.88	1993.94
ENSMUSG00000078429.8	chr10	126978717	126999975	Ctdsp2	protein_coding	KNOWN	21259	8111.61	0.161649	0.176198	0.106088	1.52372	0.127578	0.21032	7556.93	7586.83	7509.51	10126.5	8881.15	7395.56	7724.82
ENSMUSG00000078435.5	chr10	82128013	82153065	AU041133	protein_coding	KNOWN	25053	327.487	-0.733817	-0.761176	0.170742	-4.29781	1.72493e-05	8.98779e-05	448.329	417.041	417.678	320.032	213.387	242.809	233.13
ENSMUSG00000078439.9	chr10	81393051	81395392	Smim24	protein_coding	KNOWN	2342	51.1111	0.379655	0.431702	0.273151	1.38991	0.164556	0.257691	47.4194	36.1371	44.2929	72.2251	51.2128	54.3792	52.1113
ENSMUSG00000078440.9	chr10	81384428	81391560	Dohh	protein_coding	KNOWN	7133	2952.62	0.102463	0.107076	0.0956561	1.07116	0.284097	0.396763	2701.83	2973.01	2809.49	2930.1	3031.16	2963.03	3259.7
ENSMUSG00000078451.4	chr10	41490439	41514284	Ppil6	protein_coding	KNOWN	23846	281.384	-0.261312	-0.271253	0.140163	-1.86434	0.0622744	0.117039	315.77	306.677	313.362	249.052	257.131	279.484	248.214
ENSMUSG00000078453.2	chr10	18011263	18023252	Abracl	protein_coding	KNOWN	11990	251.34	0.0401453	0.0390477	0.212552	0.188873	0.850193	0.896427	265.118	222.683	254.581	252.788	280.603	168.196	315.411
ENSMUSG00000084849.1	chr10	81461159	81462972	Gm16105	antisense	KNOWN	1814	79.7361	-0.254402	-0.292781	0.25411	-1.00115	0.316754	0.432023	96.9943	74.2275	96.0369	87.1682	74.6853	79.6718	49.3686
ENSMUSG00000084899.1	chr10	86692119	86693095	Gm15344	processed_transcript	KNOWN	977	214.32	0.551299	0.585636	0.167168	3.29788	0.000974194	0.00330657	158.424	173.849	167.651	318.787	267.8	216.252	197.474
ENSMUSG00000085282.8	chr10	105573953	105583874	Gm15663	processed_transcript	KNOWN	9922	337.989	0.0733009	0.0597463	0.139138	0.526823	0.598316	0.69921	345.946	298.863	345.236	341.201	368.092	323.746	342.838
ENSMUSG00000085666.3	chr10	42054113	42055306	Gm9855	processed_pseudogene	KNOWN	1194	450.065	-0.10449	-0.0920509	0.121225	-0.861952	0.388714	0.505503	472.039	480.526	447.068	447.048	468.384	403.417	431.975
ENSMUSG00000085687.1	chr10	4409033	4423369	Gm16153	processed_transcript	KNOWN	14337	184.242	-1.34939	-1.41812	0.186783	-7.22438	5.03389e-13	9.44249e-12	300.682	280.307	279.418	136.979	101.359	93.5827	97.3659
ENSMUSG00000085779.1	chr10	81194609	81210877	Atcayos	antisense	KNOWN	16269	246.07	0.24283	0.237344	0.152749	1.58973	0.111896	0.189154	233.864	201.196	234.711	276.448	273.135	261.779	241.358
ENSMUSG00000085837.8	chr10	116473163	116475319	Kcnmb4os2	antisense	KNOWN	2157	315.622	1.21745	1.31804	0.196959	6.18124	6.3601e-10	7.45636e-09	162.735	166.035	182.139	267.731	364.891	467.914	597.909
ENSMUSG00000086915.7	chr10	39558496	39613682	Gm16365	antisense	KNOWN	55187	106.451	0.188572	0.194283	0.212082	0.889144	0.373926	0.490905	92.6834	94.7378	107.628	133.243	91.7562	111.288	113.822
ENSMUSG00000087014.1	chr10	39556071	39558062	Gm16364	antisense	KNOWN	1992	155.815	0.247533	0.245476	0.182904	1.35335	0.175944	0.271835	139.025	130.875	152.748	180.563	158.973	185.901	142.62
ENSMUSG00000087177.7	chr10	39621412	39732007	E130307A14Rik	processed_transcript	KNOWN	110596	1869.18	0.187651	0.198898	0.103417	1.81451	0.0695993	0.128039	1753.44	1723.84	1693.48	1886.57	1922.61	2228.28	1876.01
ENSMUSG00000087481.7	chr10	82178235	82198385	Gm15608	antisense	KNOWN	20151	48.0895	-0.853122	-0.971971	0.272675	-3.12871	0.00175577	0.00555375	63.5851	69.3441	67.4742	42.3389	30.9411	34.145	28.7984
ENSMUSG00000087651.2	chr10	83722865	83762761	1500009L16Rik	protein_coding	KNOWN	39897	465.879	-0.0267006	-0.0214171	0.149935	-0.178081	0.858659	0.90285	453.718	497.129	458.659	442.067	503.592	379.389	526.599
ENSMUSG00000087672.1	chr10	80282444	80283006	Gm15122	antisense	KNOWN	563	158.063	-0.327641	-0.351505	0.211115	-1.55196	0.120672	0.200893	197.222	159.198	184.623	180.563	144.036	136.58	104.223
ENSMUSG00000087819.1	chr10	111481493	111481636	Gm25117	snoRNA	KNOWN	144	51.813	0.428831	0.488152	0.282348	1.5188	0.128812	0.211906	29.0983	48.8339	48.4324	51.0557	65.0829	70.8194	49.3686
ENSMUSG00000089855.1	chr10	105238134	105238292	Gm15662	unprocessed_pseudogene	KNOWN	159	112.347	0.724915	0.814188	0.223805	3.23905	0.0011993	0.00396264	64.6628	119.155	51.3301	202.977	157.906	116.346	74.0529
ENSMUSG00000089959.1	chr10	86839094	86874954	Gm16268	antisense	KNOWN	35861	52.477	1.01548	1.17004	0.274457	3.69997	0.000215623	0.000866778	30.176	35.1604	26.4929	48.5652	66.1498	77.1425	83.6524
ENSMUSG00000090035.3	chr10	99108159	99113247	Galnt4	protein_coding	KNOWN	5089	352.177	0.118093	0.0989719	0.13529	0.872886	0.382725	0.499702	348.102	306.677	360.552	369.842	365.958	378.125	335.981
ENSMUSG00000090112.8	chr10	11149427	11217595	Shprh	protein_coding	KNOWN	68169	4562.85	-0.794496	-0.800465	0.0959094	-8.28382	1.19284e-16	3.55164e-15	6026.58	6056.38	6007.69	3882.72	3525.15	3344.95	3096.51
ENSMUSG00000090247.7	chr10	128917882	128924035	Bloc1s1	protein_coding	KNOWN	6154	64.6763	0.089983	0.106774	0.244775	0.367615	0.71316	0.791768	54.9634	71.2975	59.6091	63.5083	59.7482	69.5547	74.0529
ENSMUSG00000090622.1	chr10	69209762	69213098	A930033H14Rik	protein_coding	KNOWN	3337	250.445	0.497455	0.506194	0.145965	3.40804	0.000654304	0.00233262	191.833	204.126	209.874	271.467	281.67	288.336	305.811
ENSMUSG00000090666.1	chr10	33994989	33995054	Gm17567	protein_coding	KNOWN	66	69.3094	-0.480708	-0.535011	0.258888	-1.85682	0.0633372	0.118607	92.6834	80.0876	79.8928	77.2061	53.3467	59.4377	42.5119
ENSMUSG00000090761.1	chr10	128391842	128395563	Gm17201	antisense	KNOWN	3722	251.701	0.260731	0.266875	0.162397	1.60552	0.108379	0.184411	248.952	198.266	229.33	298.862	281.67	257.985	246.843
ENSMUSG00000090841.1	chr10	128490860	128493875	Myl6	protein_coding	KNOWN	3016	13905	0.805423	0.835779	0.127964	6.29414	3.09111e-10	3.76275e-09	9453.71	9756.04	9589.62	14057.7	16303.8	16822.1	21351.9
ENSMUSG00000091455.3	chr10	107762223	107912134	Otogl	protein_coding	KNOWN	149912	90.9484	-0.0291648	-0.0369276	0.213859	-0.136374	0.891526	0.926394	86.2171	93.7611	96.8648	89.6587	98.1578	74.6133	97.3659
ENSMUSG00000091511.2	chr10	130471332	130497379	Vmn2r87	protein_coding	KNOWN	26048	134.904	0.231273	0.248924	0.215772	1.07184	0.283792	0.396422	114.238	126.968	124.186	136.979	134.434	190.959	116.565
ENSMUSG00000091994.1	chr10	79851381	79854956	E130317F20Rik	processed_transcript	KNOWN	3576	187.024	-0.14946	-0.149376	0.18107	-0.825424	0.409131	0.525774	178.901	222.683	192.902	176.827	161.107	166.931	209.817
ENSMUSG00000093674.7	chr10	128548114	128549305	Rpl41	protein_coding	KNOWN	1192	11233	0.884335	0.928635	0.142419	6.20939	5.319e-10	6.30704e-09	7283.19	7421.77	7519.86	11177.5	12054.2	14156.3	19017.9
ENSMUSG00000093798.1	chr10	14745362	14746117	Gm8355	processed_pseudogene	KNOWN	756	133.575	1.46234	1.55437	0.208964	6.99806	2.59534e-12	4.38253e-11	54.9634	50.7872	84.4463	125.771	171.776	208.664	238.615
ENSMUSG00000094906.1	chr10	5357173	5357279	Gm23573	snRNA	KNOWN	107	89.2645	1.84895	2.12371	0.276715	6.68177	2.36068e-11	3.52044e-10	28.0206	35.1604	28.5627	136.979	147.237	170.725	78.167
ENSMUSG00000095123.1	chr10	4391587	4396424	Gm21781	lincRNA	KNOWN	4838	1515.63	-0.389442	-0.408306	0.137277	-2.8369	0.00455541	0.0126558	1804.09	1686.72	1801.52	1415.86	1258.98	1547.91	1094.34
ENSMUSG00000096054.2	chr10	5020203	5550692	Syne1	protein_coding	KNOWN	530490	53051.6	0.940002	0.963369	0.127545	7.36997	1.70664e-13	3.37191e-12	34509.5	34124.1	34527.8	69925.1	68555.8	76032.2	53687
ENSMUSG00000096687.7	chr10	39890018	39899238	Mfsd4b4	protein_coding	KNOWN	9221	629.792	-1.18467	-1.20953	0.129089	-9.17718	4.42513e-20	1.8372e-18	949.466	920.031	926.839	465.727	419.305	385.713	341.466
ENSMUSG00000096795.4	chr10	81704825	81726686	Zfp433	protein_coding	KNOWN	21862	106.812	-0.400807	-0.412639	0.203969	-1.96504	0.0494099	0.0965076	133.637	131.852	108.042	105.847	87.4885	99.9059	80.9097
ENSMUSG00000096841.1	chr10	29349585	29349691	Gm25596	snRNA	KNOWN	107	55.8301	0.0360705	0.0380898	0.267395	0.134896	0.892694	0.927254	59.2743	49.8106	55.8836	64.7535	61.8821	59.4377	39.7692
ENSMUSG00000096924.1	chr10	39864859	39866332	Gm26824	lincRNA	KNOWN	1474	65.3751	0.908991	1.05193	0.27683	3.28357	0.00102503	0.003455	31.2537	43.9505	46.3627	75.9609	62.949	117.611	79.5383
ENSMUSG00000096991.1	chr10	63292286	63295793	Gm26789	lincRNA	KNOWN	3508	417.123	1.74892	2.29518	0.349189	5.0085	5.48563e-07	3.90337e-06	128.248	130.875	127.911	306.334	521.73	1119.2	585.567
ENSMUSG00000097134.1	chr10	66912489	66920258	1110002J07Rik	lincRNA	KNOWN	7770	44.5428	0.0576911	0.0615528	0.273397	0.211016	0.832875	0.884101	46.3417	38.0904	45.9487	47.3199	43.7443	50.5853	39.7692
ENSMUSG00000097164.1	chr10	94673493	94688613	Cep83os	lincRNA	KNOWN	15121	1788.33	-0.644359	-0.632063	0.090874	-7.09069	1.33443e-12	2.34224e-11	2168.36	2403.6	2157.11	1598.91	1531.05	1362.01	1297.3
ENSMUSG00000097331.1	chr10	127195249	127202643	F420014N23Rik	lincRNA	KNOWN	7395	187.001	0.204302	0.227294	0.185487	1.10144	0.270706	0.38214	188.6	158.222	164.339	220.411	237.926	169.461	170.047
ENSMUSG00000097348.8	chr10	92071037	92165170	Rmst	lincRNA	KNOWN	94134	49.9691	-0.0696806	-0.0796604	0.279844	-0.248998	0.803362	0.861046	49.5748	56.6473	48.4324	39.8483	52.2797	63.2316	39.7692
ENSMUSG00000097353.1	chr10	128499364	128504242	A430046D13Rik	lincRNA	KNOWN	4879	932.25	-0.291348	-0.280895	0.114208	-2.55102	0.0107408	0.0264385	1002.27	1105.6	1003.42	811.91	782.062	901.682	918.805
ENSMUSG00000097372.1	chr10	128645884	128649811	Gm26876	lincRNA	KNOWN	3928	48.2423	-0.714224	-0.823758	0.285005	-2.50601	0.0122103	0.0295007	64.6628	65.4374	62.5068	47.3199	29.8741	40.4682	27.427
ENSMUSG00000097383.1	chr10	89686371	89700866	1500026H17Rik	lincRNA	KNOWN	14496	100.608	-0.139051	-0.144372	0.211756	-0.656656	0.511402	0.623006	107.771	102.551	108.869	87.1682	82.1538	92.3181	123.422
ENSMUSG00000097412.1	chr10	86685601	86694806	1810014B01Rik	lincRNA	KNOWN	9206	144.543	-0.222354	-0.228273	0.17632	-1.26109	0.207278	0.309733	157.346	163.105	152.748	130.752	144.036	123.934	139.878
ENSMUSG00000097869.1	chr10	106466939	106470768	C230021G24Rik	lincRNA	KNOWN	3830	190.198	0.558276	0.594673	0.192598	2.89866	0.00374756	0.0107214	153.035	134.782	153.99	159.393	212.32	298.453	219.416
ENSMUSG00000097889.1	chr10	80681838	80687176	Gm26541	lincRNA	KNOWN	5339	134.353	1.63091	1.8089	0.210215	7.75831	8.6066e-15	2.00293e-13	63.5851	48.8339	53.3998	110.828	133.367	263.043	267.413
ENSMUSG00000098188.1	chr10	59221953	59226434	Sowahc	protein_coding	KNOWN	4482	935.128	0.679747	0.748619	0.171473	3.96417	7.36508e-05	0.00033281	663.872	680.744	675.57	759.609	917.562	1589.64	1258.9
ENSMUSG00000100201.1	chr10	80587965	80589790	Gm29093	sense_intronic	KNOWN	1826	152.372	0.107986	0.112032	0.18454	0.585166	0.558436	0.664397	131.481	160.175	145.297	153.167	172.843	171.99	131.65
ENSMUSG00000104443.1	chr10	118860826	118863542	4932442E05Rik	TEC	KNOWN	2717	117.592	0.361627	0.381714	0.230373	1.56975	0.116473	0.195364	92.6834	96.6911	111.353	129.507	141.902	161.873	89.1378
ENSMUSG00000109776.1	chr10	78747130	78767585	RP23-416G20.2	processed_transcript	KNOWN	20456	49.1985	-0.759456	-0.867577	0.275979	-2.75186	0.00592584	0.0159233	65.7406	70.3208	62.9207	31.1315	42.6773	29.0865	42.5119
ENSMUSG00000000056.7	chr11	121237253	121255856	Narf	protein_coding	KNOWN	18604	2974.25	-0.688481	-0.688242	0.111968	-6.14889	7.80276e-10	9.00528e-09	3720.27	3936.01	3736.33	2663.61	2567.04	1883.04	2313.47
ENSMUSG00000000093.6	chr11	85832551	85841948	Tbx2	protein_coding	KNOWN	9398	103.857	0.0213939	0.0138041	0.209082	0.102323	0.9185	0.945838	94.8388	104.505	110.525	90.904	108.827	121.405	95.9945
ENSMUSG00000000125.5	chr11	103774150	103817957	Wnt3	protein_coding	KNOWN	43808	118.47	0.306439	0.316324	0.188318	1.62724	0.103686	0.177982	105.616	97.6678	108.455	127.017	134.434	134.051	122.05
ENSMUSG00000000126.11	chr11	59306928	59333552	Wnt9a	protein_coding	KNOWN	26625	290.112	-1.3892	-1.43949	0.155579	-8.92922	4.29023e-19	1.60951e-17	444.018	462.945	454.52	205.468	162.174	146.697	154.963
ENSMUSG00000000142.15	chr11	108920349	108950783	Axin2	protein_coding	KNOWN	30435	1423.04	-0.534798	-0.557281	0.140156	-3.81574	0.000135775	0.000574581	1724.34	1674.03	1827.6	1509.26	1159.76	1109.08	957.203
ENSMUSG00000000202.9	chr11	114791217	114795945	Btbd17	protein_coding	KNOWN	4729	986.785	0.326564	0.321461	0.111081	2.93986	0.00328363	0.00957177	891.269	800.876	898.69	896.587	1033.86	1234.28	1151.93
ENSMUSG00000000275.16	chr11	88999376	89020293	Trim25	protein_coding	KNOWN	20918	410.128	0.400289	0.424029	0.138639	2.88728	0.0038859	0.0110401	323.314	376.998	329.092	468.218	438.509	509.646	425.119
ENSMUSG00000000276.11	chr11	89035179	89066850	Dgke	protein_coding	KNOWN	31672	5518.04	-0.667734	-0.670799	0.0944068	-7.07294	1.51684e-12	2.64454e-11	7135.54	6907.07	6977.99	4875.19	4563.27	4117.64	4049.6
ENSMUSG00000000278.10	chr11	88924020	88955465	Scpep1	protein_coding	KNOWN	31446	485.378	-0.199778	-0.211002	0.122765	-1.62733	0.103668	0.177969	531.313	512.756	534.826	418.407	470.517	486.883	442.946
ENSMUSG00000000282.12	chr11	74830920	74845725	Mnt	protein_coding	KNOWN	14806	3066.59	0.310982	0.320172	0.115738	2.68695	0.00721075	0.0188079	2737.39	2603.82	2714.7	2703.46	3288.29	3939.33	3479.12
ENSMUSG00000000301.16	chr11	59970614	60046489	Pemt	protein_coding	KNOWN	75876	84.5921	0.154259	0.168704	0.218415	0.706266	0.480022	0.593321	87.2948	72.2742	77.4091	69.7346	90.6893	97.3766	97.3659
ENSMUSG00000000317.11	chr11	70224128	70229798	Bcl6b	protein_coding	KNOWN	5671	145.46	1.44893	1.56726	0.200659	7.22084	5.16681e-13	9.68015e-12	65.7406	86.9243	52.9859	173.091	198.45	233.957	207.074
ENSMUSG00000000378.15	chr11	6546887	6596744	Ccm2	protein_coding	KNOWN	49858	2466.88	0.740622	0.774342	0.122585	6.04168	1.52519e-09	1.67341e-08	1734.04	1823.46	1706.31	2522.9	2915.93	2995.91	3569.63
ENSMUSG00000000384.15	chr11	6615598	6626067	Tbrg4	protein_coding	KNOWN	10470	1860.06	0.127877	0.121946	0.105062	1.21716	0.223543	0.328581	1742.66	1759.97	1809.8	2036	2011.17	1990.53	1670.3
ENSMUSG00000000538.18	chr11	60226714	60352905	Tom1l2	protein_coding	KNOWN	126192	16689.5	0.0323193	0.0378651	0.0789528	0.409349	0.682283	0.767298	16262.7	16753.9	16302.3	16103.7	16627.1	17236.9	17539.6
ENSMUSG00000000567.5	chr11	112782224	112787760	Sox9	protein_coding	KNOWN	5537	2301.76	1.20284	1.25372	0.140052	8.58854	8.80813e-18	2.98117e-16	1301.88	1239.4	1313.88	2169.24	2840.18	3849.54	3398.21
ENSMUSG00000000581.8	chr11	17257579	17269176	C1d	protein_coding	KNOWN	11598	2162.95	-0.0653231	-0.0623327	0.110553	-0.590878	0.554602	0.660996	2142.5	2303.98	2203.05	2326.15	2182.94	1775.54	2206.5
ENSMUSG00000000594.7	chr11	55098115	55113029	Gm2a	protein_coding	KNOWN	14915	3625.02	0.23492	0.225901	0.0911053	2.57856	0.00992138	0.0247462	3247.15	3261.13	3406.41	3500.43	3775.88	4015.2	4168.91
ENSMUSG00000000631.20	chr11	77763246	77865980	Myo18a	protein_coding	KNOWN	102735	10153.4	-0.139425	-0.140631	0.079315	-1.75786	0.0787707	0.141729	10953.9	10495.4	10718.1	9498.85	9615.2	10276.4	9515.8
ENSMUSG00000000632.13	chr11	77930800	77979048	Sez6	protein_coding	KNOWN	48249	4410.89	-0.116179	-0.109639	0.0901778	-1.28833	0.197631	0.29844	4591.06	4657.78	4561.34	4497.88	4651.83	3824.25	4092.11
ENSMUSG00000000751.13	chr11	75298166	75348324	Rpa1	protein_coding	KNOWN	50159	3804.03	0.166189	0.172337	0.0957468	1.73571	0.082615	0.147588	3551.07	3539.48	3550.05	3519.11	3881.5	4197.31	4389.69
ENSMUSG00000000753.15	chr11	75409769	75422701	Serpinf1	protein_coding	KNOWN	12933	935.539	0.442855	0.46704	0.116343	3.80647	0.000140966	0.000593163	784.576	769.622	749.254	915.266	1002.92	1235.54	1091.59
ENSMUSG00000000782.15	chr11	52252371	52283014	Tcf7	protein_coding	KNOWN	30644	131.229	-0.0813385	-0.102978	0.196426	-0.414094	0.678806	0.76418	140.103	121.108	148.609	122.036	152.571	117.611	116.565
ENSMUSG00000000804.14	chr11	84984442	85140161	Usp32	protein_coding	KNOWN	155720	12184.9	0.242371	0.248362	0.0836279	2.89821	0.00375297	0.0107329	10891.4	11144.9	10974.7	14227.1	13352.7	12677.9	12025.4
ENSMUSG00000000805.18	chr11	84957786	84966044	Car4	protein_coding	KNOWN	8259	3198.59	0.309315	0.296377	0.0925805	3.34104	0.000834643	0.00288383	2843.01	2710.28	2936.16	3289.98	3370.44	3385.42	3854.87
ENSMUSG00000000861.15	chr11	24078056	24174123	Bcl11a	protein_coding	KNOWN	96068	4160.19	-0.35964	-0.390234	0.088966	-4.04244	5.28974e-05	0.000245952	4938.09	4443.88	5053.53	3517.86	3807.88	3753.43	3606.65
ENSMUSG00000000869.12	chr11	53602982	53618669	Il4	protein_coding	KNOWN	15688	597.934	-0.165788	-0.185354	0.118037	-1.40454	0.160158	0.251947	626.152	626.051	674.328	598.97	629.49	512.176	518.37
ENSMUSG00000000976.13	chr11	83753696	83783754	Heatr6	protein_coding	KNOWN	30059	1431.84	-0.816854	-0.845291	0.124439	-6.56432	5.22721e-11	7.22758e-10	1954.97	1808.81	1989.45	1234.05	1095.74	1047.11	892.749
ENSMUSG00000001029.15	chr11	106377656	106388075	Icam2	protein_coding	KNOWN	10420	111.261	0.378795	0.419378	0.199177	1.9018	0.0571975	0.108886	108.849	89.8544	81.1346	129.507	101.359	137.845	130.278
ENSMUSG00000001034.17	chr11	61488812	61494406	Mapk7	protein_coding	KNOWN	5595	1643.36	-0.294245	-0.289577	0.116858	-2.51797	0.0118034	0.0286287	1920.49	1781.46	1799.86	1745.85	1486.24	1420.18	1349.41
ENSMUSG00000001036.17	chr11	61517249	61579687	Epn2	protein_coding	KNOWN	62439	11008.3	-0.505817	-0.511512	0.0870991	-5.80738	6.3459e-09	6.31306e-08	13327	13140.2	13349.5	10185	9561.85	8676.64	8817.78
ENSMUSG00000001039.12	chr11	61505144	61512931	B9d1	protein_coding	KNOWN	7788	996.079	-0.136665	-0.14797	0.10341	-1.32159	0.186306	0.2849	1037.84	1042.12	1084.55	909.04	884.487	975.031	1039.48
ENSMUSG00000001053.15	chr11	51643063	51650842	N4bp3	protein_coding	KNOWN	7780	353.515	0.142955	0.137652	0.135017	1.05879	0.289694	0.403133	314.692	342.814	345.65	395.993	340.352	373.066	362.037
ENSMUSG00000001054.9	chr11	51623671	51635896	Rmnd5b	protein_coding	KNOWN	12226	3006.28	0.0939943	0.134698	0.141281	0.665302	0.505857	0.617847	2829	2992.54	2719.67	2331.13	2715.34	3523.26	3933.03
ENSMUSG00000001056.3	chr11	51619735	51623714	Nhp2	protein_coding	KNOWN	3980	1098.86	0.174839	0.189098	0.135198	1.29321	0.195938	0.296458	959.165	1104.62	988.518	1140.66	1114.94	1015.5	1368.61
ENSMUSG00000001100.10	chr11	78512193	78522736	Poldip2	protein_coding	KNOWN	10544	4989.83	0.0110234	0.0221788	0.102456	0.107592	0.914319	0.942718	4979.04	5032.82	4826.27	4806.7	4982.58	4650.05	5651.34
ENSMUSG00000001103.7	chr11	78503447	78505081	Sebox	protein_coding	KNOWN	1635	268.894	0.169885	0.170655	0.171138	0.99268	0.320866	0.43637	272.662	221.706	258.306	322.522	251.796	245.339	309.925
ENSMUSG00000001105.15	chr11	78536361	78541737	Ift20	protein_coding	KNOWN	5377	2248.39	-0.0943075	-0.0852423	0.105374	-0.894983	0.370796	0.487867	2259.97	2449.51	2264.32	2202.87	2163.74	1994.32	2403.98
ENSMUSG00000001123.15	chr11	78962974	78984946	Lgals9	protein_coding	KNOWN	21973	307.974	0.415171	0.42874	0.135941	3.05404	0.00225782	0.00693744	265.118	250.03	256.236	352.409	330.749	335.127	366.151
ENSMUSG00000001240.13	chr11	101246028	101259546	Ramp2	protein_coding	KNOWN	13519	1192.27	-0.151836	-0.169226	0.129011	-1.17692	0.239227	0.34664	1328.82	1171.04	1318.44	1085.87	1208.84	971.237	1261.64
ENSMUSG00000001313.12	chr11	101464999	101471853	Rnd2	protein_coding	KNOWN	6855	5488.73	0.477029	0.49492	0.118672	4.01973	5.82642e-05	0.000268139	4509.16	4442.91	4393.28	5703.29	6030.31	5765.45	7576.71
ENSMUSG00000001323.17	chr11	74906359	74925948	Srr	protein_coding	KNOWN	19590	3893.61	-0.0735354	-0.0713572	0.0832502	-0.883306	0.377071	0.493991	3917.49	4112.79	3981.81	3849.1	3689.45	3911.51	3793.16
ENSMUSG00000001440.5	chr11	97159714	97187881	Kpnb1	protein_coding	KNOWN	28168	15518.3	0.364441	0.36575	0.0768675	4.74115	2.12506e-06	1.34274e-05	13544.7	13044.5	13376	17427.4	17591.6	16957.4	16686.6
ENSMUSG00000001441.13	chr11	97205842	97280638	Npepps	protein_coding	KNOWN	74797	9310.64	-0.0613984	-0.0713607	0.0829943	-0.739791	0.459427	0.574057	9761.93	9211.05	9751.06	9325.75	9273.78	9197.66	8653.22
ENSMUSG00000001445.10	chr11	97041560	97049213	Mrpl10	protein_coding	KNOWN	7654	1884.8	-0.231185	-0.223119	0.0923945	-2.50215	0.0123442	0.0297688	2095.08	2058.84	2004.77	1730.91	1758.31	1680.7	1865.04
ENSMUSG00000001493.9	chr11	101877510	101894374	Meox1	protein_coding	KNOWN	16865	86.4649	0.325221	0.35478	0.212628	1.52953	0.126134	0.208451	76.5177	75.2042	72.0277	103.357	89.6224	89.7888	98.7372
ENSMUSG00000001506.10	chr11	94936224	94953042	Col1a1	protein_coding	KNOWN	16819	330.211	0.217119	0.193872	0.172346	1.25979	0.207746	0.310224	342.713	229.519	343.166	361.125	383.029	318.687	333.238
ENSMUSG00000001507.16	chr11	95044474	95076801	Itga3	protein_coding	KNOWN	32328	590.109	-0.188904	-0.205446	0.110168	-1.7147	0.0864005	0.153208	604.598	652.421	658.598	561.612	587.88	534.939	530.713
ENSMUSG00000001552.14	chr11	100368958	100397763	Jup	protein_coding	KNOWN	28806	1015.97	-0.0853038	-0.0941318	0.108222	-0.788227	0.430564	0.546475	1094.96	993.281	1073.79	902.814	955.972	1125.52	965.431
ENSMUSG00000001555.10	chr11	100415697	100424824	Fkbp10	protein_coding	KNOWN	9128	304.651	0.254536	0.26361	0.147569	1.72486	0.0845522	0.150393	269.428	277.377	273.208	282.674	354.222	330.069	345.58
ENSMUSG00000001751.9	chr11	101070012	101077672	Naglu	protein_coding	KNOWN	7661	354.294	-0.538665	-0.563411	0.130825	-4.11746	3.83079e-05	0.000183682	440.785	412.158	450.794	290.146	265.666	300.982	319.525
ENSMUSG00000001755.12	chr11	101082565	101086619	Coasy	protein_coding	KNOWN	4055	958.334	-0.348551	-0.355442	0.0991594	-3.51506	0.000439659	0.00162823	1096.04	1089	1099.87	879.154	830.074	844.774	869.436
ENSMUSG00000001891.16	chr11	21321138	21371201	Ugp2	protein_coding	KNOWN	50064	4838.96	0.32049	0.325399	0.0973492	3.29217	0.000994172	0.00336265	4107.17	4349.15	4226.87	5672.16	5214.1	4757.54	5545.74
ENSMUSG00000001901.15	chr11	106008124	106034549	Kcnh6	protein_coding	KNOWN	26426	106.268	-0.209653	-0.207784	0.197084	-1.06378	0.287431	0.400735	122.859	123.061	99.3485	98.3756	112.028	93.5827	94.6232
ENSMUSG00000001983.7	chr11	106066061	106073612	Taco1	protein_coding	KNOWN	7552	507.358	-0.795602	-0.809618	0.127649	-6.23273	4.58389e-10	5.4771e-09	684.348	670.001	662.738	392.257	436.376	362.949	342.838
ENSMUSG00000002052.6	chr11	78206746	78245987	Supt6	protein_coding	KNOWN	39242	21845.7	0.393892	0.400248	0.116277	3.38754	0.000705216	0.00248855	18819	17620.2	18973.5	19455.9	23512	29572.1	24966.8
ENSMUSG00000002055.9	chr11	78301529	78322457	Spag5	protein_coding	KNOWN	20929	1081.86	0.347949	0.354985	0.134752	2.58215	0.00981876	0.0245256	957.01	857.523	984.792	968.813	1014.65	1582.05	1208.16
ENSMUSG00000002058.13	chr11	78343482	78349164	Unc119	protein_coding	KNOWN	5683	1073.25	-0.197996	-0.188701	0.130295	-1.5196	0.128612	0.211644	1099.27	1256.98	1106.08	1097.07	1069.07	795.453	1088.85
ENSMUSG00000002059.18	chr11	78188430	78192193	Rab34	protein_coding	KNOWN	3764	1036.67	-0.525108	-0.541124	0.119816	-4.3826	1.1727e-05	6.34611e-05	1292.18	1199.36	1295.26	996.208	906.893	787.865	778.927
ENSMUSG00000002064.10	chr11	78245746	78255496	Sdf2	protein_coding	KNOWN	9751	2545.49	0.135455	0.145437	0.0975664	1.38834	0.165033	0.258335	2333.25	2511.04	2355.8	2710.93	2649.19	2431.89	2826.35
ENSMUSG00000002129.11	chr11	4160350	4182541	Sf3a1	protein_coding	KNOWN	22192	4283.82	-0.595305	-0.60045	0.106548	-5.58723	2.30722e-08	2.09575e-07	5331.45	5241.83	5382.21	4074.49	3778.01	3094.55	3084.17
ENSMUSG00000002580.7	chr11	98437708	98438991	Mien1	protein_coding	KNOWN	1284	459.25	0.267783	0.267239	0.134856	1.98569	0.0470683	0.0927114	403.065	407.275	423.887	475.689	490.789	447.68	566.368
ENSMUSG00000002699.13	chr11	34046920	34092295	Lcp2	protein_coding	KNOWN	45376	165.466	0.288711	0.287537	0.167544	1.7232	0.0848526	0.150842	135.792	146.502	158.544	202.977	189.914	168.196	156.334
ENSMUSG00000002741.9	chr11	5955693	5967780	Ykt6	protein_coding	KNOWN	12088	4694.79	0.0132176	0.0246723	0.0886308	0.149132	0.88145	0.920285	4577.05	4826.74	4543.13	4898.85	4868.42	4293.42	4855.95
ENSMUSG00000002812.4	chr11	60714123	60727263	Flii	protein_coding	KNOWN	13141	2258.47	-0.0565332	-0.0641034	0.0901278	-0.627255	0.530492	0.639408	2391.45	2210.22	2346.28	2214.07	2290.71	2196.66	2159.88
ENSMUSG00000002814.15	chr11	60740058	60777365	Top3a	protein_coding	KNOWN	37308	282.552	-0.975554	-1.01174	0.158831	-6.14208	8.14494e-10	9.35167e-09	398.754	393.601	398.222	239.09	200.583	187.165	160.448
ENSMUSG00000003119.14	chr11	98203059	98278504	Cdk12	protein_coding	KNOWN	75446	3868.39	0.696748	0.709205	0.110224	6.32122	2.59499e-10	3.20536e-09	2867.8	2790.37	2857.51	5252.51	4520.6	4733.52	4056.45
ENSMUSG00000003518.13	chr11	101971143	101987013	Dusp3	protein_coding	KNOWN	15871	7938.02	0.260313	0.250985	0.0884699	2.94239	0.00325684	0.00949903	7096.75	6992.04	7392.77	7601.07	8267.66	9195.14	9020.74
ENSMUSG00000003581.14	chr11	4135202	4141172	Rnf215	protein_coding	KNOWN	5971	1341.71	-0.332796	-0.326181	0.0938732	-3.54516	0.000392372	0.00147165	1477.55	1586.12	1487.74	1312.5	1280.32	1104.02	1143.71
ENSMUSG00000003585.13	chr11	4097039	4123415	Sec14l2	protein_coding	KNOWN	26377	4937.25	-0.253432	-0.248423	0.0993262	-2.55151	0.0107257	0.0264098	5402.58	5475.26	5405.8	5044.55	5003.92	3893.8	4334.84
ENSMUSG00000003934.5	chr11	69554092	69560205	Efnb3	protein_coding	KNOWN	6114	8152.4	-0.298958	-0.290317	0.088525	-3.3771	0.000732541	0.00257157	8985.98	9413.22	8901.63	7081.8	7164.46	8058.23	7461.52
ENSMUSG00000003948.17	chr11	90249456	90278589	Mmd	protein_coding	KNOWN	29134	17847	0.144893	0.126014	0.0884693	1.63777	0.101469	0.175025	17461.1	15789	17636.9	17895.6	19298.7	17717.5	19130.3
ENSMUSG00000003949.16	chr11	90336536	90390895	Hlf	protein_coding	KNOWN	54360	9558.27	-0.441115	-0.433587	0.0839436	-5.25489	1.4811e-07	1.17529e-06	10934.5	11790.5	10944.1	8092.95	8359.42	8111.35	8675.16
ENSMUSG00000004018.9	chr11	26386135	26471876	Fancl	protein_coding	KNOWN	85742	393.798	-0.05585	-0.0546833	0.141233	-0.395447	0.692513	0.77533	366.423	439.505	401.12	349.918	380.895	405.947	412.776
ENSMUSG00000004040.16	chr11	100885098	100939540	Stat3	protein_coding	KNOWN	54443	6335.83	1.24016	1.43507	0.262785	4.7193	2.36662e-06	1.47839e-05	3365.7	3084.35	3180.4	4700.86	6904.12	12920.7	10194.6
ENSMUSG00000004043.14	chr11	100859351	100885169	Stat5a	protein_coding	KNOWN	25819	117.503	0.133522	0.129817	0.210593	0.63403	0.526061	0.635642	120.704	93.7611	120.046	119.545	115.229	151.756	101.48
ENSMUSG00000004044.9	chr11	100956733	100970887	Ptrf	protein_coding	KNOWN	14155	884.659	0.611038	0.612009	0.129345	4.7241	2.31132e-06	1.44576e-05	696.203	634.841	707.444	980.02	1105.34	1160.93	907.834
ENSMUSG00000004393.10	chr11	6258919	6267772	Ddx56	protein_coding	KNOWN	8854	1920.5	0.0384369	0.0351195	0.0997183	0.385454	0.699901	0.781466	1851.51	1908.43	1921.57	2148.07	1983.43	1716.1	1914.41
ENSMUSG00000004394.12	chr11	6270369	6274870	Tmed4	protein_coding	KNOWN	4502	4036.33	-0.00246091	-0.00364733	0.0877558	-0.0280428	0.977628	0.985565	3997.24	4076.65	4052.59	3862.8	4126.9	3893.8	4244.33
ENSMUSG00000004748.5	chr11	4091480	4095445	Mtfp1	protein_coding	KNOWN	3966	4243.03	-0.235801	-0.237645	0.0952109	-2.47662	0.0132634	0.0316812	4467.12	4845.3	4626.33	3810.5	4193.05	3642.14	4116.79
ENSMUSG00000004798.14	chr11	61775649	61855073	Ulk2	protein_coding	KNOWN	79425	8093.36	-0.171293	-0.160595	0.0879366	-1.94792	0.0514245	0.0996177	8547.35	8897.54	8390.4	8175.13	7620.04	7102.17	7920.92
ENSMUSG00000004837.2	chr11	61653265	61672784	Grap	protein_coding	KNOWN	19520	331.688	0.340533	0.358988	0.156642	2.17396	0.0297084	0.0625295	268.351	302.77	285.627	361.125	320.08	347.774	436.089
ENSMUSG00000005043.13	chr11	119343425	119355536	Sgsh	protein_coding	KNOWN	12112	398.649	-0.129163	-0.142911	0.124854	-1.03451	0.300899	0.415052	431.086	397.508	435.478	342.447	373.427	404.682	405.92
ENSMUSG00000005198.15	chr11	69733997	69758637	Polr2a	protein_coding	KNOWN	24641	11341.3	0.832103	0.8672	0.120578	6.90094	5.16589e-12	8.38568e-11	8020.35	7248.9	7861.78	10212.4	12434	16980.2	16631.7
ENSMUSG00000005204.12	chr11	69673115	69682084	Senp3	protein_coding	KNOWN	8970	5746.18	0.266587	0.263819	0.076173	3.49977	0.000465668	0.00171071	5177.34	5084.58	5203.38	6221.32	6122.06	6243.49	6171.08
ENSMUSG00000005237.14	chr11	69420809	69549110	Dnah2	protein_coding	KNOWN	128302	453.484	0.269056	0.280094	0.169385	1.58843	0.112189	0.189587	426.775	375.044	410.227	439.577	452.38	657.608	412.776
ENSMUSG00000005267.13	chr11	62700356	62731905	Zfp287	protein_coding	KNOWN	31550	915.455	-0.758876	-0.769912	0.14436	-5.25684	1.46549e-07	1.16534e-06	1169.32	1224.75	1202.12	922.738	723.381	631.051	534.827
ENSMUSG00000005417.17	chr11	59661305	59780860	Mprip	protein_coding	KNOWN	119556	28083.7	0.0406057	0.0359231	0.0780389	0.520326	0.602836	0.702786	27876.1	27222.9	27955.4	28075.6	27656	30029.9	27769.8
ENSMUSG00000005917.15	chr11	21994764	22002897	Otx1	protein_coding	KNOWN	8134	336.984	0.647319	0.713139	0.17526	3.69349	0.0002212	0.000886681	240.33	266.633	233.469	305.089	340.352	446.415	526.599
ENSMUSG00000005949.9	chr11	73183596	73199042	Ctns	protein_coding	KNOWN	15447	1077.16	-0.534132	-0.540293	0.116046	-4.60275	4.16949e-06	2.46918e-05	1318.04	1295.07	1320.51	1046.02	963.441	803.041	794.012
ENSMUSG00000005950.14	chr11	73160421	73172685	P2rx5	protein_coding	KNOWN	12265	423.201	-0.173257	-0.222977	0.135413	-1.27947	0.200733	0.301982	497.904	371.138	513.715	369.842	380.895	447.68	381.235
ENSMUSG00000005951.13	chr11	73199460	73224511	Shpk	protein_coding	KNOWN	25052	199.186	-0.969829	-0.984679	0.160442	-6.04473	1.49663e-09	1.64555e-08	271.584	310.584	250.855	161.884	151.504	117.611	130.278
ENSMUSG00000006057.15	chr11	96068852	96075670	Atp5g1	protein_coding	KNOWN	6819	6778.19	0.116871	0.126216	0.10726	1.08961	0.275886	0.387846	6300.32	6699.03	6325.6	6851.42	7113.24	6290.28	7867.44
ENSMUSG00000006058.10	chr11	96034885	96047430	Snf8	protein_coding	KNOWN	12546	2804.87	0.142066	0.139185	0.101675	1.39726	0.162334	0.254703	2643.63	2625.31	2685.31	2844.17	2881.79	2703.78	3250.1
ENSMUSG00000006127.9	chr11	75630988	75648871	Inpp5k	protein_coding	KNOWN	17884	3555.27	0.238051	0.248972	0.113854	2.09084	0.0365424	0.0745549	3224.52	3188.85	3216	3236.43	3630.77	4561.53	3828.81
ENSMUSG00000006169.19	chr11	45852051	45910625	Clint1	protein_coding	KNOWN	58575	4494.76	0.103357	0.109244	0.089453	1.15544	0.247912	0.356854	4294.69	4335.47	4274.06	5020.89	4690.24	4241.57	4606.37
ENSMUSG00000006575.14	chr11	102393403	102402555	Rundc3a	protein_coding	KNOWN	9153	19721.6	0.287911	0.294716	0.0980085	2.93762	0.00330744	0.00962315	17199.2	17745.3	17436.5	20026.3	20757.2	20671.7	24215.3
ENSMUSG00000006782.16	chr11	100574904	100591729	Cnp	protein_coding	KNOWN	16826	8030.86	0.371649	0.365161	0.091655	4.05487	5.01622e-05	0.000234246	6841.33	6788.89	7057.47	9019.42	8652.83	9574.52	8281.59
ENSMUSG00000006784.14	chr11	100545607	100572568	Ttc25	protein_coding	KNOWN	26962	59.6578	-0.178781	-0.192405	0.245837	-0.727237	0.467081	0.581573	64.6628	63.4841	64.5766	46.0746	52.2797	60.7023	65.8248
ENSMUSG00000006920.14	chr11	101191115	101226463	Ezh1	protein_coding	KNOWN	35349	5460.53	-0.432789	-0.434689	0.077311	-5.59803	2.16806e-08	1.9728e-07	6414.55	6437.28	6390.18	4704.59	4866.28	4689.25	4721.56
ENSMUSG00000006930.15	chr11	100347327	100356128	Hap1	protein_coding	KNOWN	8802	15555.4	0.0145255	0.0221129	0.102516	0.14169	0.887325	0.924065	15613.9	15207.9	15436.3	13010.5	15021.3	17789.6	16808.6
ENSMUSG00000006931.15	chr11	100408456	100414836	P3h4	protein_coding	KNOWN	6381	512.965	0.16839	0.174969	0.127912	1.31645	0.188024	0.286994	427.852	532.289	473.147	535.462	524.931	552.644	544.426
ENSMUSG00000007646.13	chr11	87376645	87404954	Rad51c	protein_coding	KNOWN	28310	279.134	-0.422047	-0.422025	0.144655	-2.9176	0.00352732	0.0101679	340.558	329.14	309.636	263.995	248.595	245.339	216.673
ENSMUSG00000007653.12	chr11	42419757	42629028	Gabrb2	protein_coding	KNOWN	209272	9672.05	-0.421118	-0.41062	0.106993	-3.93595	8.28681e-05	0.000369148	10974.4	12075.6	10750.3	9410.43	7673.38	8833.45	7986.75
ENSMUSG00000007739.10	chr11	22990519	23003780	Cct4	protein_coding	KNOWN	13262	6669.37	0.132259	0.145093	0.0914379	1.44643	0.148055	0.236831	6144.05	6569.14	6154.23	7516.39	7096.17	6165.08	7040.51
ENSMUSG00000007777.9	chr11	51685386	51688874	0610009B22Rik	protein_coding	KNOWN	3489	575.537	-0.682734	-0.700014	0.159463	-4.28147	1.85666e-05	9.61303e-05	765.177	716.882	730.626	547.915	474.785	332.598	460.774
ENSMUSG00000007850.16	chr11	50376990	50386528	Hnrnph1	protein_coding	KNOWN	9539	27433.2	0.578604	0.578304	0.0959555	6.02992	1.64043e-09	1.786e-08	21704.1	20721.2	21782.6	31319.5	32295	34949.4	29260.5
ENSMUSG00000008855.17	chr11	102194432	102230166	Hdac5	protein_coding	KNOWN	35735	12639.8	0.721441	0.768631	0.142586	5.05968	4.19958e-07	3.06532e-06	8782.29	9529.45	8733.15	11638.2	14548.7	19434.9	15811.7
ENSMUSG00000009073.16	chr11	4765845	4849536	Nf2	protein_coding	KNOWN	83692	8530.84	0.147892	0.154849	0.0854698	1.73034	0.0835695	0.148952	7937.36	8170.89	7928.01	8965.87	8723.24	8518.56	9471.92
ENSMUSG00000009075.2	chr11	4736892	4746778	Cabp7	protein_coding	KNOWN	9887	15815.1	0.188859	0.187383	0.117424	1.60835	0.107758	0.183475	14987.8	14107.1	14866.3	16774.9	15733	14663.4	19573.3
ENSMUSG00000009076.10	chr11	4704678	4737669	Zmat5	protein_coding	KNOWN	32992	400.277	0.12818	0.136076	0.14684	0.872921	0.382706	0.499702	409.531	351.604	375.455	367.352	403.301	383.183	511.514
ENSMUSG00000009079.16	chr11	5069689	5099266	Ewsr1	protein_coding	KNOWN	29578	17650.8	0.104142	0.0920026	0.0942016	1.10553	0.268931	0.380186	17257.4	16255.8	17518.9	18852	18430.2	18864.5	16376.7
ENSMUSG00000009090.17	chr11	4986824	5042791	Ap1b1	protein_coding	KNOWN	55968	9101.84	-0.0240487	-0.0256059	0.0864313	-0.278241	0.780828	0.84378	9135.78	9223.75	9223.27	8820.18	8963.3	8637.43	9709.16
ENSMUSG00000009894.15	chr11	59407134	59451186	Snap47	protein_coding	KNOWN	44053	16897.1	0.0315895	0.0357051	0.098516	0.320653	0.748473	0.818845	16473.9	16966.8	16534.9	15827.3	17648.1	16100	18728.5
ENSMUSG00000010021.13	chr11	114765388	114790739	Kif19a	protein_coding	KNOWN	25352	192.741	0.252873	0.248413	0.16904	1.49594	0.13467	0.219433	199.377	140.642	182.139	210.449	195.249	207.4	213.931
ENSMUSG00000010025.19	chr11	61223417	61267464	Aldh3a2	protein_coding	KNOWN	44048	2664.47	-0.21199	-0.231884	0.0938112	-2.25975	0.023837	0.0521233	2919.53	2800.14	3014.81	2374.71	2640.66	2369.92	2531.51
ENSMUSG00000010080.15	chr11	94489599	94499974	Epn3	protein_coding	KNOWN	10376	58.4277	-0.201876	-0.221203	0.257758	-0.783197	0.433511	0.549439	60.352	65.4374	64.9905	72.2251	58.6813	37.9389	49.3686
ENSMUSG00000010086.17	chr11	61448442	61454131	Rnf112	protein_coding	KNOWN	5690	28769.3	-0.282308	-0.3203	0.0952874	-2.9627	0.00304949	0.00897495	34211	28602	34574.5	25182.9	25894.5	28216.5	24703.5
ENSMUSG00000010142.12	chr11	61126755	61149372	Tnfrsf13b	protein_coding	KNOWN	22618	97.8378	-0.094354	-0.101889	0.206291	-0.457382	0.647396	0.738465	105.616	99.6211	100.176	85.923	106.693	93.5827	93.2518
ENSMUSG00000010277.7	chr11	78261752	78290623	2610507B11Rik	protein_coding	KNOWN	28872	25231.4	0.0853377	0.0804935	0.074824	1.14051	0.254073	0.363571	24882.3	23703	24705.9	25151.8	24619.5	26153.8	27403.7
ENSMUSG00000010358.13	chr11	101448407	101458698	Ifi35	protein_coding	KNOWN	10292	113.453	0.223746	0.243215	0.215115	1.04012	0.298284	0.412249	109.927	96.6911	101.418	127.017	132.3	91.0535	135.764
ENSMUSG00000010362.9	chr11	101627195	101636100	Rdm1	protein_coding	KNOWN	8906	182.06	0.498507	0.50977	0.173949	2.86582	0.00415937	0.0117186	144.414	136.735	158.544	205.468	195.249	187.165	246.843
ENSMUSG00000010392.8	chr11	76726602	76763579	Gosr1	protein_coding	KNOWN	36978	3262.61	-0.484989	-0.472608	0.111305	-4.3573	1.31675e-05	7.0497e-05	3783.85	4076.65	3786.42	3420.73	2960.74	2285.19	2524.66
ENSMUSG00000010554.14	chr11	74770830	74828525	Mettl16	protein_coding	KNOWN	57696	2241.44	-0.2267	-0.230953	0.0940766	-2.40974	0.015964	0.0370795	2479.82	2403.6	2461.77	2255.17	2096.52	1952.59	2040.57
ENSMUSG00000010803.13	chr11	42130939	42182930	Gabra1	protein_coding	KNOWN	51992	15156	-0.207992	-0.194452	0.0991755	-2.09721	0.0359747	0.0736477	15708.8	17526.5	15763.3	14350.4	12904.6	15154.1	14684.4
ENSMUSG00000011254.16	chr11	45946843	45955494	Thg1l	protein_coding	KNOWN	8652	547.392	0.00337535	-0.010892	0.141102	0.0239213	0.980915	0.987871	555.023	514.709	579.533	562.858	603.884	443.886	571.853
ENSMUSG00000011256.16	chr11	46055992	46147343	Adam19	protein_coding	KNOWN	91352	747.545	0.0792633	0.0629615	0.111575	0.710407	0.477452	0.591129	747.933	679.768	759.188	754.628	802.334	767.631	721.33
ENSMUSG00000011877.13	chr11	77493562	77507786	Git1	protein_coding	KNOWN	14225	21967.2	0.377519	0.399508	0.120374	3.13621	0.00171145	0.00542724	17941.8	19870.5	17927	25343.5	21807	22497.8	28382.8
ENSMUSG00000013483.14	chr11	119307768	119345375	Card14	protein_coding	KNOWN	37608	45.2288	-1.12402	-1.34507	0.306344	-3.66912	0.000243383	0.000964916	77.5954	54.694	75.3393	12.4526	30.9411	35.4097	30.1697
ENSMUSG00000013646.17	chr11	58330724	58347728	Sh3bp5l	protein_coding	KNOWN	17005	2724.76	-0.348577	-0.347606	0.0851118	-4.09552	4.2123e-05	0.000199943	3125.37	3110.72	3077.74	2566.48	2432.61	2367.39	2393.01
ENSMUSG00000014177.10	chr11	62879455	62916780	Tvp23b	protein_coding	KNOWN	37326	1551.34	-0.0672261	-0.065709	0.108429	-0.619999	0.535259	0.643758	1599.33	1591.98	1584.2	1630.05	1495.84	1349.36	1608.59
ENSMUSG00000014195.15	chr11	100582818	100620168	Dnajc7	protein_coding	KNOWN	37351	8074.11	0.0445611	0.0449148	0.0750867	0.593463	0.552872	0.659591	7982.63	7878.86	7930.91	8180.12	8262.33	8054.44	8229.47
ENSMUSG00000014243.5	chr11	62267224	62281375	Zswim7	protein_coding	KNOWN	14152	309.478	0.372703	0.382252	0.138617	2.68872	0.00717256	0.0187239	252.185	272.493	266.585	347.428	335.017	323.746	368.893
ENSMUSG00000014245.8	chr11	62458460	62514417	Pigl	protein_coding	KNOWN	55958	473.843	-0.459865	-0.477798	0.126073	-3.64761	0.000264696	0.00103831	562.567	555.73	576.222	435.841	373.427	423.652	389.464
ENSMUSG00000014349.7	chr11	96047432	96065388	Ube2z	protein_coding	KNOWN	17957	5828.04	0.0195976	0.0263793	0.0914386	0.214326	0.830293	0.882137	5723.74	5829.79	5748.14	6415.58	6311.98	5177.4	5589.62
ENSMUSG00000014606.14	chr11	70644196	70647479	Slc25a11	protein_coding	KNOWN	3284	4787.38	-0.125688	-0.117235	0.0953899	-1.31762	0.187629	0.286438	5009.21	5124.63	4898.71	4446.82	4775.59	4289.63	4967.03
ENSMUSG00000015542.17	chr11	115182832	115187859	Nat9	protein_coding	KNOWN	5028	523.37	-0.0995481	-0.101086	0.121878	-0.816787	0.41405	0.530651	545.323	544.01	543.933	453.275	522.797	539.998	514.256
ENSMUSG00000015837.15	chr11	50199366	50210827	Sqstm1	protein_coding	KNOWN	11462	23681.5	0.384464	0.393057	0.0899884	4.27237	1.93404e-05	9.95407e-05	20159.7	20106.9	19993.9	23562.8	26766.1	27164.3	28016.7
ENSMUSG00000015869.16	chr11	116470845	116494202	Prpsap1	protein_coding	KNOWN	23358	1733.76	-0.389567	-0.391157	0.117093	-3.32698	0.000877937	0.00301203	2022.87	1975.82	2019.26	1765.78	1654.81	1263.37	1434.43
ENSMUSG00000016559.14	chr11	116021912	116027962	H3f3b	protein_coding	KNOWN	6051	20268.1	1.50072	1.53952	0.11376	13.192	9.75918e-40	1.36883e-37	9616.44	9721.85	9758.92	22931.5	26595.4	29975.6	33277.2
ENSMUSG00000016940.18	chr11	115420128	115431274	Kctd2	protein_coding	KNOWN	11147	2458.9	-0.40928	-0.401472	0.0974155	-4.20139	2.65283e-05	0.000132039	2719.07	3067.75	2778.86	2387.16	2267.23	1850.16	2142.05
ENSMUSG00000016984.7	chr11	17938756	17953875	Etaa1	protein_coding	KNOWN	15120	338.111	-1.3762	-1.42409	0.170012	-8.09471	5.73999e-16	1.57058e-14	537.779	531.313	512.059	256.524	197.383	147.962	183.761
ENSMUSG00000017119.19	chr11	101552149	101581951	Nbr1	protein_coding	KNOWN	29803	11877.3	-0.303609	-0.305426	0.0839046	-3.61851	0.00029631	0.00114719	13465	13235.9	13291.2	10463.9	11070.5	11318.5	10296.1
ENSMUSG00000017132.17	chr11	118132019	118248592	Cyth1	protein_coding	KNOWN	116574	7259.66	-0.421625	-0.416189	0.0849341	-4.96415	6.9004e-07	4.77902e-06	8440.66	8647.51	8330.79	6049.47	6106.06	6825.22	6417.92
ENSMUSG00000017146.12	chr11	101488764	101551955	Brca1	protein_coding	KNOWN	63192	124.821	0.257983	0.267845	0.185363	1.39178	0.163991	0.256987	117.471	101.574	116.321	122.036	123.764	156.814	135.764
ENSMUSG00000017167.6	chr11	101170523	101190724	Cntnap1	protein_coding	KNOWN	20202	19213.1	0.129386	0.11955	0.0789067	1.63973	0.10106	0.174435	19096	17102.6	18728.9	17814.7	19314.7	21293.9	21140.7
ENSMUSG00000017176.17	chr11	100422321	100441808	Nt5c3b	protein_coding	KNOWN	19488	2285.61	0.0107152	0.000438866	0.0893548	0.119918	0.904548	0.935728	2314.93	2204.36	2336.35	2275.09	2142.4	2448.33	2277.81
ENSMUSG00000017188.3	chr11	101277968	101279114	Coa3	protein_coding	KNOWN	1147	1947.05	-0.144901	-0.144243	0.110616	-1.30995	0.190214	0.289679	2073.52	2056.88	2046.58	1891.55	1977.03	1603.55	1980.23
ENSMUSG00000017210.14	chr11	98704591	98729435	Med24	protein_coding	KNOWN	24845	6476.65	-0.192096	-0.195491	0.083939	-2.28852	0.0221075	0.0489325	7220.68	6733.22	6992.9	5873.89	6355.72	6105.64	6054.51
ENSMUSG00000017221.14	chr11	98682554	98695979	Psmd3	protein_coding	KNOWN	13426	6496.63	0.0565067	0.0569607	0.0818719	0.690184	0.490078	0.602831	6280.92	6419.7	6350.86	6384.45	6939.33	6476.18	6624.99
ENSMUSG00000017286.15	chr11	76120987	76243725	Glod4	protein_coding	KNOWN	122739	2690.04	0.113104	0.130813	0.11863	0.953423	0.340376	0.456601	2434.56	2777.67	2442.73	2866.59	2612.92	2528	3167.82
ENSMUSG00000017288.15	chr11	76046226	76179647	Vps53	protein_coding	KNOWN	133422	3959.57	-0.0308066	-0.0390315	0.0873954	-0.352497	0.724465	0.800892	4025.26	3946.76	4090.68	3608.76	3956.19	3951.97	4137.36
ENSMUSG00000017291.13	chr11	77529162	77607815	Taok1	protein_coding	KNOWN	78654	17210.8	0.000395865	0.0217371	0.118825	0.0033315	0.997342	0.998047	16856.5	17684.7	16647.1	22024.9	17402.7	15197.1	14662.5
ENSMUSG00000017314.12	chr11	102057015	102088515	Mpp2	protein_coding	KNOWN	31501	15060.8	0.597379	0.621658	0.0980951	6.08979	1.13057e-09	1.2709e-08	11227.6	12140.1	11180.9	15897	17555.3	19199.6	18225.2
ENSMUSG00000017344.4	chr11	78499091	78502324	Vtn	protein_coding	KNOWN	3234	2586.13	0.353006	0.333507	0.116553	3.02872	0.00245596	0.00745524	2328.94	2016.84	2408.79	2709.69	3233.87	2645.61	2759.16
ENSMUSG00000017376.15	chr11	78567168	78697373	Nlk	protein_coding	KNOWN	130206	3524.06	-0.194841	-0.19297	0.0854146	-2.28112	0.0225413	0.0497372	3783.85	3825.65	3777.31	3561.44	3401.38	3108.46	3210.33
ENSMUSG00000017386.10	chr11	78158499	78165589	Traf4	protein_coding	KNOWN	7091	511.96	-0.0261775	-0.0301473	0.116555	-0.224593	0.822296	0.876211	553.945	479.549	520.752	504.33	482.254	512.176	530.713
ENSMUSG00000017390.15	chr11	78322968	78327781	Aldoc	protein_coding	KNOWN	4814	41574	0.33607	0.34906	0.098405	3.41518	0.000637407	0.00227662	35591.5	36723.1	35537.4	40743.7	45450.3	45832.8	51139
ENSMUSG00000017400.10	chr11	98036623	98053462	Stac2	protein_coding	KNOWN	16840	3912.77	0.294852	0.271034	0.114116	2.58378	0.00977231	0.0244214	3698.71	3063.84	3735.92	4274.98	3836.69	3901.39	4877.89
ENSMUSG00000017404.12	chr11	98026710	98030492	Rpl19	protein_coding	KNOWN	3783	6878.29	0.460666	0.475701	0.121977	3.77667	0.000158939	0.000659873	5537.29	5706.73	5625.61	6943.57	7487.74	7312.1	9535
ENSMUSG00000017405.14	chr11	78166106	78176675	Nek8	protein_coding	KNOWN	10570	178.234	0.33308	0.344866	0.164301	2.02725	0.0426369	0.0851698	160.579	141.618	161.027	179.317	168.575	206.135	230.387
ENSMUSG00000017417.14	chr11	97923238	97986444	Plxdc1	protein_coding	KNOWN	63207	321.928	0.167546	0.183205	0.150036	1.11671	0.264119	0.374642	256.496	358.441	281.488	331.239	353.155	349.038	323.639
ENSMUSG00000017421.18	chr11	80383279	80405733	Zfp207	protein_coding	KNOWN	22455	10550.8	-0.249899	-0.243714	0.105609	-2.36627	0.0179684	0.040953	11711.5	11554.1	11472.3	11339.3	10051.6	9331.72	8395.41
ENSMUSG00000017428.16	chr11	80428615	80473248	Psmd11	protein_coding	KNOWN	44634	4389.32	0.253528	0.248555	0.0799142	3.17251	0.00151129	0.00486344	3973.53	3894.99	4021.96	4825.38	4805.47	4589.35	4614.59
ENSMUSG00000017446.14	chr11	118428203	118449963	C1qtnf1	protein_coding	KNOWN	21761	72.9889	0.0639071	0.0708975	0.235118	0.271808	0.785769	0.847616	66.8183	78.1342	67.8882	75.9609	87.4885	78.4072	56.2254
ENSMUSG00000017453.4	chr11	77880615	77894096	Pipox	protein_coding	KNOWN	13482	62.0735	0.364007	0.409354	0.262264	1.38794	0.165154	0.258447	47.4194	60.554	48.8464	53.5462	88.5554	67.0255	68.5675
ENSMUSG00000017466.9	chr11	118301069	118355740	Timp2	protein_coding	KNOWN	54672	12640.2	0.0578988	0.0596685	0.107947	0.536364	0.591707	0.694115	12373.2	12311	12342.8	11965.7	14601	11649.8	13237.6
ENSMUSG00000017493.12	chr11	99041244	99054392	Igfbp4	protein_coding	KNOWN	13149	1551.64	0.312811	0.30791	0.122719	2.549	0.0108033	0.0265714	1364.39	1297.03	1436.41	1717.21	2014.37	1592.17	1439.92
ENSMUSG00000017548.15	chr11	79993106	80034123	Suz12	protein_coding	KNOWN	41018	3780.82	0.164376	0.182461	0.0992655	1.65592	0.0977371	0.169621	3540.29	3576.59	3414.28	4566.37	3971.12	3639.61	3757.5
ENSMUSG00000017550.14	chr11	80089400	80135794	Atad5	protein_coding	KNOWN	46395	446.394	-0.842247	-0.875114	0.150872	-5.58251	2.37074e-08	2.14969e-07	615.375	580.147	613.891	400.974	308.344	326.275	279.755
ENSMUSG00000017561.16	chr11	80046493	80080991	Crlf3	protein_coding	KNOWN	34499	1014.6	-0.447386	-0.454123	0.101643	-4.40154	1.07484e-05	5.87163e-05	1142.38	1250.15	1206.67	945.153	959.173	767.631	831.038
ENSMUSG00000017615.12	chr11	78522850	78536332	Tnfaip1	protein_coding	KNOWN	13483	2738.61	-0.0949119	-0.100846	0.0835654	-1.13578	0.256048	0.365492	2798.82	2865.57	2881.11	2798.1	2724.95	2531.79	2569.91
ENSMUSG00000017631.18	chr11	76416734	76622314	Abr	protein_coding	KNOWN	205581	62011.1	-0.0316108	-0.0344327	0.071472	-0.442282	0.658285	0.747327	63103.4	62320.8	63150.5	61698.9	60378.8	61252.4	62172.9
ENSMUSG00000017639.13	chr11	79591212	79698023	Rab11fip4	protein_coding	KNOWN	106812	21520.9	-0.0842224	-0.0739265	0.0823614	-1.02259	0.306499	0.421024	21897	22892.4	21670.4	20978.9	20563	20396	22248.8
ENSMUSG00000017677.11	chr11	79239372	79254671	Wsb1	protein_coding	KNOWN	15300	12066.2	1.00602	1.01539	0.0875304	11.4934	1.42379e-30	1.19821e-28	7517.05	7686.45	7653.56	15687.8	15274.2	16301.1	14343
ENSMUSG00000017686.16	chr11	80209019	80267907	Rhot1	protein_coding	KNOWN	58889	4937.24	-0.168587	-0.160216	0.0957043	-1.76154	0.0781477	0.140836	5322.83	5285.78	5149.57	5123	4728.65	4208.69	4742.13
ENSMUSG00000017692.8	chr11	80300912	80355955	Rhbdl3	protein_coding	KNOWN	55044	1389.6	-0.221387	-0.199954	0.116028	-1.90804	0.056386	0.107596	1380.55	1709.19	1411.99	1591.44	1356.07	1038.26	1239.7
ENSMUSG00000017713.9	chr11	117867952	117873481	Tha1	protein_coding	KNOWN	5530	160.271	-0.924688	-0.978412	0.191213	-4.83589	1.32548e-06	8.71838e-06	231.709	210.962	226.432	135.733	125.898	91.0535	100.109
ENSMUSG00000017715.11	chr11	117986292	118024011	Pgs1	protein_coding	KNOWN	37720	3899.41	0.0754944	0.0761892	0.0997844	0.756575	0.449304	0.564313	3804.33	3753.37	3788.91	4028.42	3820.69	3693.99	4406.15
ENSMUSG00000017716.15	chr11	117849251	117855743	Birc5	protein_coding	KNOWN	6493	55.9537	-0.348257	-0.404607	0.27222	-1.27932	0.200783	0.302028	78.6731	49.8106	66.6463	57.282	43.7443	54.3792	41.1405
ENSMUSG00000017718.15	chr11	117825924	117839908	Afmid	protein_coding	KNOWN	13985	53.5065	-0.396214	-0.44192	0.26838	-1.47632	0.139858	0.226135	56.0411	71.2975	61.6789	43.5841	38.4096	56.9084	46.6259
ENSMUSG00000017724.14	chr11	101769742	101785371	Etv4	protein_coding	KNOWN	15630	659.732	0.309497	0.315279	0.12035	2.57165	0.0101215	0.0251648	585.199	559.636	591.952	651.271	636.959	849.832	743.272
ENSMUSG00000017747.13	chr11	100766032	100770957	Ghdc	protein_coding	KNOWN	4926	298.289	0.00311203	0.0352409	0.13768	0.0226033	0.981967	0.988264	320.081	302.77	259.548	296.372	299.808	285.807	323.639
ENSMUSG00000017774.19	chr11	75650504	75673910	Myo1c	protein_coding	KNOWN	23407	792.943	-0.0505377	-0.0536557	0.116282	-0.434612	0.663844	0.751432	827.684	784.272	817.556	793.231	871.684	749.926	706.246
ENSMUSG00000017776.15	chr11	75679259	75706908	Crk	protein_coding	KNOWN	27650	11735.3	0.151649	0.162182	0.096041	1.579	0.114336	0.192464	10865.5	11172.2	10927.1	14050.3	12776.5	10708.9	11646.9
ENSMUSG00000017781.17	chr11	75588097	75628804	Pitpna	protein_coding	KNOWN	40708	24004.1	0.932083	0.987471	0.136484	6.82923	8.53692e-12	1.33848e-10	15205.5	15685.4	15225.2	22129.5	27150.2	37252.2	35380.8
ENSMUSG00000017801.15	chr11	101087277	101092207	Mlx	protein_coding	KNOWN	4931	1318.36	-0.136009	-0.131372	0.115945	-1.17305	0.240776	0.348483	1435.51	1360.51	1366.04	1305.03	1362.47	1083.79	1315.13
ENSMUSG00000017802.14	chr11	101096322	101119893	Fam134c	protein_coding	KNOWN	23572	5039.18	-0.0961648	-0.0895511	0.0850475	-1.13072	0.258174	0.368053	5111.6	5401.03	5143.36	5218.89	4942.03	4527.38	4930
ENSMUSG00000017830.15	chr11	100694884	100704271	Dhx58	protein_coding	KNOWN	9388	46.1952	-0.420917	-0.488082	0.291967	-1.44166	0.149398	0.238502	57.1188	55.6706	52.9859	54.7915	36.2757	40.4682	26.0557
ENSMUSG00000017837.12	chr11	100619244	100627607	Nkiras2	protein_coding	KNOWN	8364	398.322	-0.419507	-0.418883	0.136735	-3.06804	0.00215467	0.00665861	468.806	480.526	446.654	391.012	316.879	356.626	327.753
ENSMUSG00000018012.11	chr11	120721470	120723969	Rac3	protein_coding	KNOWN	2500	841.197	0.0847747	0.0924686	0.136681	0.620238	0.535101	0.643668	821.218	810.643	799.756	772.061	889.822	766.367	1028.51
ENSMUSG00000018068.13	chr11	86210681	86257575	Ints2	protein_coding	KNOWN	46895	2092.22	-0.64153	-0.660269	0.1183	-5.42291	5.86381e-08	5.01839e-07	2758.95	2505.18	2679.51	1738.38	1713.49	1821.07	1428.95
ENSMUSG00000018160.15	chr11	98152154	98193293	Med1	protein_coding	KNOWN	41140	4998.48	-0.232289	-0.239472	0.107765	-2.15552	0.0311214	0.0650201	5641.83	5258.43	5531.23	5068.21	4589.95	4830.89	4068.8
ENSMUSG00000018167.10	chr11	98358368	98381112	Stard3	protein_coding	KNOWN	22745	1314.02	-0.0878395	-0.0822154	0.107454	-0.817463	0.413664	0.530287	1382.71	1350.75	1337.48	1333.67	1347.54	1126.79	1319.24
ENSMUSG00000018171.9	chr11	86583865	86683836	Vmp1	protein_coding	KNOWN	99972	6757.81	0.919858	1.07484	0.265891	3.45953	0.00054111	0.00195911	4180.45	4175.3	4064.6	5094.36	6851.84	9771.81	13166.3
ENSMUSG00000018217.12	chr11	63128982	63159547	Pmp22	protein_coding	KNOWN	30566	1081.94	0.583152	0.593662	0.0990341	5.88839	3.89969e-09	4.01285e-08	836.306	841.896	836.184	1250.24	1215.24	1343.04	1250.67
ENSMUSG00000018239.9	chr11	53324679	53333301	Zcchc10	protein_coding	KNOWN	8623	364.521	-0.824255	-0.850686	0.14175	-5.81486	6.06848e-09	6.05642e-08	481.738	492.246	493.017	311.315	262.466	235.221	275.641
ENSMUSG00000018286.6	chr11	70525367	70527858	Psmb6	protein_coding	KNOWN	2492	4307.14	0.418593	0.429775	0.0999371	4.18857	2.80721e-05	0.000138924	3555.38	3661.57	3566.2	4541.46	4774.53	4628.55	5422.32
ENSMUSG00000018287.12	chr11	70663771	70669416	Spag7	protein_coding	KNOWN	5646	1908.21	-0.0267006	-0.0215904	0.106117	-0.251614	0.801339	0.859587	1868.76	2006.1	1898.8	1917.7	1871.4	1719.9	2074.85
ENSMUSG00000018293.4	chr11	70651850	70654644	Pfn1	protein_coding	KNOWN	2795	8713.82	0.6728	0.692825	0.118961	5.65566	1.5525e-08	1.44909e-07	6590.22	6215.58	6525.96	8110.38	10096.4	10970.7	12487.5
ENSMUSG00000018334.17	chr11	79013440	79146407	Ksr1	protein_coding	KNOWN	132968	7959.08	-0.538455	-0.543576	0.0816261	-6.59661	4.20675e-11	5.92714e-10	9661.71	9732.59	9702.63	6626.03	7036.42	6300.39	6653.79
ENSMUSG00000018339.11	chr11	54902453	54910377	Gpx3	protein_coding	KNOWN	7925	148.464	-0.252267	-0.267776	0.208174	-1.21181	0.225585	0.330989	172.434	151.385	169.306	149.431	171.776	97.3766	127.536
ENSMUSG00000018340.13	chr11	54979108	55033445	Anxa6	protein_coding	KNOWN	54338	7858.18	-0.0866368	-0.0933668	0.0918902	-0.942829	0.345768	0.462083	8503.16	7716.73	8230.2	6953.53	7985.99	7629.52	7988.12
ENSMUSG00000018347.16	chr11	65807175	65829239	Zkscan6	protein_coding	KNOWN	22065	984.732	-0.540241	-0.563934	0.152597	-3.54032	0.000399643	0.00149353	1286.79	1113.41	1224.06	745.911	772.459	1064.82	685.675
ENSMUSG00000018362.14	chr11	106988629	106999541	Kpna2	protein_coding	KNOWN	10913	1046.9	-0.00306554	-0.00114574	0.116289	-0.0263615	0.978969	0.986701	1005.51	1093.88	1042.75	1041.04	1034.93	945.944	1164.28
ENSMUSG00000018363.16	chr11	106820066	106920715	Smurf2	protein_coding	KNOWN	100650	3453.4	0.24752	0.263958	0.101884	2.42942	0.015123	0.0354701	3024.07	3262.1	3007.78	3996.04	3365.11	3693.99	3824.7
ENSMUSG00000018372.13	chr11	106789252	106819930	Cep95	protein_coding	KNOWN	30679	883.493	-0.228918	-0.216057	0.124032	-1.84564	0.0649445	0.121005	1001.2	951.284	926.839	692.365	779.928	999.059	833.781
ENSMUSG00000018377.10	chr11	88068279	88084729	Vezf1	protein_coding	KNOWN	16451	2145.99	0.361446	0.353563	0.0886688	4.07637	4.5745e-05	0.000215167	1841.81	1812.71	1901.7	2240.22	2320.58	2524.2	2380.66
ENSMUSG00000018378.13	chr11	88098058	88194140	Cuedc1	protein_coding	KNOWN	96083	2186.01	0.180203	0.183513	0.0965357	1.8667	0.0619434	0.116586	1975.45	2072.51	2038.3	2115.7	2232.02	2407.86	2460.2
ENSMUSG00000018379.17	chr11	88047373	88053755	Srsf1	protein_coding	KNOWN	6383	14270.9	0.286094	0.283146	0.0832811	3.43528	0.000591949	0.00212547	12904.5	12348.1	12840	15244.5	15311.6	16459.2	14788.6
ENSMUSG00000018387.12	chr11	53457205	53467766	Shroom1	protein_coding	KNOWN	10562	361.441	-0.352507	-0.376616	0.134378	-2.62325	0.00870962	0.0221496	455.873	364.301	428.027	297.617	324.348	337.657	322.267
ENSMUSG00000018395.19	chr11	53567379	53601967	Kif3a	protein_coding	KNOWN	34589	10148	-0.0789842	-0.0804338	0.0814884	-0.96927	0.332411	0.448583	10478.6	10450.5	10488.3	9927.22	10186	10168.9	9336.15
ENSMUSG00000018398.18	chr11	53519257	53549565	Sept8	protein_coding	KNOWN	30309	15970.8	0.0527137	0.0430187	0.0766418	0.687793	0.491583	0.604109	15913.5	15185.4	15998.8	15421.3	16087.2	16188.5	17000.6
ENSMUSG00000018401.17	chr11	87592162	87616302	Mtmr4	protein_coding	KNOWN	24141	6200.24	-0.468092	-0.457727	0.129455	-3.61588	0.00029933	0.00115668	7451.31	7257.69	7312.88	6309.73	6278.9	4036.7	4754.47
ENSMUSG00000018405.7	chr11	84813061	84819515	Mrm1	protein_coding	KNOWN	6455	456.16	-0.146856	-0.120443	0.132045	-1.11216	0.266068	0.37672	484.971	507.872	441.273	399.729	393.698	502.059	463.516
ENSMUSG00000018411.17	chr11	104231390	104332090	Mapt	protein_coding	KNOWN	100701	25897.2	0.0230003	0.0163835	0.0772916	0.297579	0.766025	0.832489	25919	25196.3	26072.4	24449.4	26279.6	26733	26630.3
ENSMUSG00000018412.16	chr11	104333229	104468861	Kansl1	protein_coding	KNOWN	135633	5891.46	-0.255618	-0.247966	0.097894	-2.61117	0.00902341	0.0228002	6437.19	6563.28	6427.02	6203.89	5863.86	5035.76	4709.22
ENSMUSG00000018415.14	chr11	60417145	60450927	Gid4	protein_coding	KNOWN	33783	6121.69	-0.044773	-0.0316426	0.0881144	-0.508123	0.611367	0.709903	6039.51	6528.11	6027.97	6140.38	5707.02	6165.08	6243.76
ENSMUSG00000018425.18	chr11	86768846	86807746	Dhx40	protein_coding	KNOWN	38901	2574.35	-0.148109	-0.148678	0.0997147	-1.48532	0.137458	0.222948	2705.06	2747.39	2728.36	2785.65	2396.33	2366.13	2291.53
ENSMUSG00000018427.7	chr11	86936425	86993707	Ypel2	protein_coding	KNOWN	57283	2266.81	-0.399875	-0.403161	0.103421	-3.86646	0.000110426	0.00047637	2599.45	2670.24	2631.49	2278.83	1969.56	1783.13	1934.98
ENSMUSG00000018428.15	chr11	88830792	88864586	Akap1	protein_coding	KNOWN	33795	2197.75	-1.03894	-1.05954	0.0960058	-10.8217	2.71795e-27	1.85595e-25	3074.72	3112.67	3194.88	1628.8	1614.27	1351.89	1407.01
ENSMUSG00000018433.14	chr11	107166663	107189381	Nol11	protein_coding	KNOWN	22719	1579.07	-0.194455	-0.193476	0.11443	-1.69933	0.0892561	0.157554	1726.5	1669.14	1707.55	1676.12	1598.27	1425.24	1250.67
ENSMUSG00000018442.13	chr11	71007164	71019841	Derl2	protein_coding	KNOWN	12678	1866.87	-0.852798	-0.859683	0.14018	-6.08357	1.17533e-09	1.31645e-08	2502.45	2520.81	2509.79	1841.74	1427.56	1150.81	1114.91
ENSMUSG00000018446.8	chr11	70977836	70983026	C1qbp	protein_coding	KNOWN	5191	2596.25	-0.198508	-0.186774	0.0859326	-2.31005	0.0208856	0.0466257	2762.18	2890.97	2716.35	2554.03	2575.58	2262.43	2412.21
ENSMUSG00000018449.12	chr11	70970213	70977833	Rpain	protein_coding	KNOWN	7621	607.656	-0.445151	-0.449897	0.14131	-3.15017	0.00163176	0.0052038	701.592	736.415	714.482	626.366	558.006	398.359	518.37
ENSMUSG00000018451.6	chr11	71031941	71033513	6330403K07Rik	lincRNA	KNOWN	1573	6179.36	0.125077	0.107409	0.08923	1.40174	0.160994	0.253056	6005.02	5596.36	6152.57	5847.74	6388.79	6305.45	6959.6
ENSMUSG00000018470.8	chr11	69326258	69333042	Kcnab3	protein_coding	KNOWN	6785	654.768	0.0265389	0.0325806	0.108577	0.244424	0.806902	0.86371	613.219	689.535	636.245	662.479	680.703	652.55	648.649
ENSMUSG00000018474.17	chr11	69343273	69369406	Chd3	protein_coding	KNOWN	26134	69861.9	0.246536	0.254346	0.083464	2.9538	0.00313889	0.0091998	62941.7	63093.4	62752.3	69978.7	69965.2	81353.7	78948.6
ENSMUSG00000018476.7	chr11	69398508	69413675	Kdm6b	protein_coding	KNOWN	15168	21626.1	3.06691	3.55853	0.278012	11.0316	2.6904e-28	1.96652e-26	3127.53	3039.42	2892.7	18994	31751.9	50640.9	40936.2
ENSMUSG00000018481.9	chr11	85187262	85235130	Appbp2	protein_coding	KNOWN	47869	7681.72	0.104704	0.11654	0.0802099	1.30538	0.191763	0.291502	7276.72	7524.33	7187.04	8495.17	8005.2	7785.07	7498.54
ENSMUSG00000018486.2	chr11	103727364	103749821	Wnt9b	protein_coding	KNOWN	22458	128	0.511348	0.551825	0.206968	2.47066	0.0134864	0.0321251	92.6834	113.295	97.2788	122.036	165.375	168.196	137.135
ENSMUSG00000018500.2	chr11	62248984	62266453	Adora2b	protein_coding	KNOWN	17470	490.881	0.308027	0.32193	0.141653	2.17452	0.0296665	0.0624496	436.474	427.785	424.301	551.65	535.6	451.473	608.88
ENSMUSG00000018501.17	chr11	62316426	62458541	Ncor1	protein_coding	KNOWN	142116	22450.6	-0.0148219	-0.0173364	0.0771761	-0.192053	0.847701	0.894739	22671.9	22416.7	22726	21945.2	21594.7	23623.3	22176.1
ENSMUSG00000018507.16	chr11	62574486	62600515	Trpv2	protein_coding	KNOWN	26030	647.991	0.0288569	0.0245049	0.118058	0.244431	0.806897	0.86371	633.696	640.701	650.733	581.537	683.904	681.636	663.734
ENSMUSG00000018509.8	chr11	62524946	62539261	Cenpv	protein_coding	KNOWN	14316	1267.95	-0.1679	-0.171083	0.0938432	-1.78916	0.0735896	0.134096	1389.17	1316.56	1357.76	1212.88	1140.55	1220.37	1238.33
ENSMUSG00000018537.16	chr11	97688823	97700497	Pcgf2	protein_coding	KNOWN	11675	1153.89	-0.341182	-0.33083	0.0940595	-3.6273	0.000286401	0.00111558	1280.32	1374.19	1266.28	1104.55	1076.54	983.883	991.486
ENSMUSG00000018541.10	chr11	97745481	97766556	Cwc25	protein_coding	KNOWN	21076	2851.33	1.17811	1.50462	0.332576	3.54237	0.000396545	0.00148373	1321.28	1457.2	1394.19	1943.85	2875.38	6638.05	4329.35
ENSMUSG00000018543.8	chr11	97771481	97775918	1700001P01Rik	protein_coding	KNOWN	4438	53.4006	0.0877992	0.0990695	0.257056	0.341557	0.732684	0.806388	52.808	49.8106	51.3301	49.8104	52.2797	67.0255	50.74
ENSMUSG00000018547.8	chr11	97715157	97744704	Pip4k2b	protein_coding	KNOWN	29548	10034.1	-0.258793	-0.264314	0.0871611	-2.96913	0.00298641	0.00881095	11211.5	10909.5	11165.5	9686.88	9256.71	8547.64	9460.95
ENSMUSG00000018548.15	chr11	87127077	87220683	Trim37	protein_coding	KNOWN	93607	25998.5	0.184518	0.195761	0.0884605	2.08588	0.0369892	0.0752738	23497.4	24897.5	23620.1	26785.5	26086.5	27326.2	29776.1
ENSMUSG00000018554.13	chr11	69935796	69941605	Ybx2	protein_coding	KNOWN	5810	359.73	0.260709	0.26729	0.143019	1.8229	0.0683187	0.12604	321.159	308.63	336.957	327.503	338.218	474.237	411.405
ENSMUSG00000018559.16	chr11	69981156	69990601	Ctdnep1	protein_coding	KNOWN	9446	3317.33	0.275586	0.271388	0.0997615	2.76245	0.00573695	0.0154798	2878.57	2994.49	3026.41	3294.96	3685.19	3451.18	3890.52
ENSMUSG00000018565.17	chr11	69968222	69982517	Elp5	protein_coding	KNOWN	14296	4323.96	1.15869	1.22175	0.148538	7.80059	6.16206e-15	1.46246e-13	2407.61	2542.29	2415	4063.28	5498.97	6223.25	7117.31
ENSMUSG00000018566.14	chr11	69942539	69948188	Slc2a4	protein_coding	KNOWN	5650	122.579	0.379957	0.418747	0.215291	1.76485	0.0775887	0.140023	93.7611	118.178	96.4509	113.319	145.103	123.934	167.305
ENSMUSG00000018567.14	chr11	69991143	69994951	Gabarap	protein_coding	KNOWN	3809	6961.1	0.450594	0.464152	0.106998	4.21123	2.53987e-05	0.000127108	5704.34	5787.79	5669.49	7145.3	7865.43	7486.62	9068.74
ENSMUSG00000018572.10	chr11	69995777	70000009	Phf23	protein_coding	KNOWN	4233	3231.14	0.795472	0.823393	0.0893951	8.89839	5.66638e-19	2.10047e-17	2132.8	2405.56	2194.36	4485.43	4443.78	3405.65	3550.43
ENSMUSG00000018574.14	chr11	70010183	70015411	Acadvl	protein_coding	KNOWN	5229	1302.5	0.203529	0.21122	0.0940521	2.164	0.0304643	0.063827	1157.46	1245.26	1181.83	1408.39	1361.41	1398.68	1364.49
ENSMUSG00000018583.5	chr11	55469685	55504838	G3bp1	protein_coding	KNOWN	35154	5222.08	0.0319073	0.0277501	0.0897351	0.355572	0.722161	0.798872	5142.85	5096.31	5255.12	5753.1	5537.38	4920.68	4849.1
ENSMUSG00000018585.9	chr11	55446641	55461239	Atox1	protein_coding	KNOWN	14599	1109.24	0.326889	0.336985	0.123968	2.63689	0.00836694	0.0214005	937.611	981.561	973.616	1094.58	1137.35	1184.96	1455
ENSMUSG00000018593.12	chr11	55394500	55420080	Sparc	protein_coding	KNOWN	25581	10721	0.331269	0.318594	0.098929	3.34856	0.000812338	0.00281677	9587.34	8847.72	9748.16	10410.4	12514.1	11657.4	12281.8
ENSMUSG00000018599.5	chr11	60728398	60732951	Mief2	protein_coding	KNOWN	4554	768.888	-0.913159	-0.933666	0.128132	-7.12672	1.02788e-12	1.83522e-11	1115.43	993.281	1060.96	607.687	608.152	490.677	506.028
ENSMUSG00000018634.10	chr11	104132855	104175523	Crhr1	protein_coding	KNOWN	42669	539.312	0.0858038	0.107405	0.12382	0.692971	0.488328	0.60139	511.914	544.986	492.603	643.8	571.876	479.295	530.713
ENSMUSG00000018648.15	chr11	84048041	84069261	Dusp14	protein_coding	KNOWN	21221	3561.58	0.920608	1.18625	0.342263	2.68977	0.00715011	0.018681	1990.54	2224.87	1964.62	2306.22	4699.84	7255.19	4489.8
ENSMUSG00000018651.14	chr11	84078920	84129600	Tada2a	protein_coding	KNOWN	50681	1533.35	-0.435578	-0.429738	0.0916794	-4.7511	2.02314e-06	1.28669e-05	1737.27	1904.52	1752.26	1341.15	1421.15	1312.69	1264.39
ENSMUSG00000018654.17	chr11	11685003	11772926	Ikzf1	protein_coding	KNOWN	87924	318.324	0.304155	0.304282	0.135219	2.24936	0.0244896	0.0532884	278.05	275.423	288.525	326.258	361.69	337.657	360.665
ENSMUSG00000018659.12	chr11	96937825	96943986	Pnpo	protein_coding	KNOWN	6162	1234.45	0.141893	0.159265	0.109749	1.29288	0.196052	0.296547	1129.44	1229.64	1112.7	1234.05	1366.74	1186.22	1382.32
ENSMUSG00000018661.17	chr11	113649169	113667054	Cog1	protein_coding	KNOWN	17886	2682.1	-0.505451	-0.514201	0.0957491	-5.27891	1.29956e-07	1.04401e-06	3279.48	3163.46	3266.91	2461.88	2349.39	2181.49	2072.11
ENSMUSG00000018666.13	chr11	96789127	96808640	Cbx1	protein_coding	KNOWN	19514	2448.13	-0.0765305	-0.0821212	0.104321	-0.733604	0.46319	0.57756	2554.18	2454.39	2575.61	2703.46	2418.74	2278.87	2151.65
ENSMUSG00000018669.14	chr11	96907426	96916496	Cdk5rap3	protein_coding	KNOWN	9071	1671.08	0.146353	0.158129	0.119398	1.22576	0.22029	0.324721	1481.86	1674.03	1546.11	1541.63	1716.7	1751.51	1985.72
ENSMUSG00000018672.15	chr11	96849870	96861203	Copz2	protein_coding	KNOWN	11334	302.554	0.248273	0.241179	0.148315	1.67395	0.0941404	0.164405	294.216	240.263	287.697	300.108	324.348	300.982	370.265
ENSMUSG00000018677.9	chr11	102402985	102407946	Slc25a39	protein_coding	KNOWN	4962	2615.51	0.0598312	0.0679368	0.102075	0.586152	0.557773	0.663811	2590.82	2541.32	2504	2692.25	2707.88	2395.21	2877.09
ENSMUSG00000018678.13	chr11	96953341	96982959	Sp2	protein_coding	KNOWN	29619	822.222	0.0184803	0.0113826	0.110178	0.167732	0.866794	0.909558	834.151	782.319	839.081	729.723	794.865	932.033	843.381
ENSMUSG00000018697.14	chr11	84422855	84513522	Aatf	protein_coding	KNOWN	90668	713.178	-0.355403	-0.350962	0.107923	-3.29313	0.000990802	0.00335343	830.917	817.479	792.305	655.007	655.097	596.906	644.535
ENSMUSG00000018727.19	chr11	113698172	113710017	Cpsf4l	protein_coding	KNOWN	11846	251.384	-1.04692	-1.0889	0.173985	-6.01733	1.77318e-09	1.91557e-08	355.646	382.858	343.166	186.789	172.843	192.224	126.164
ENSMUSG00000018733.10	chr11	83294642	83302586	Pex12	protein_coding	KNOWN	7945	1093.92	0.690046	0.760692	0.196048	3.51978	0.000431913	0.0016022	767.332	772.552	809.691	1003.68	967.708	1219.1	2117.37
ENSMUSG00000018736.14	chr11	68821434	68871858	Ndel1	protein_coding	KNOWN	50425	9208.82	1.5951	1.69229	0.146226	10.9084	1.05084e-27	7.40298e-26	3971.38	4202.64	3968.15	9447.79	10511.4	16275.8	16084.6
ENSMUSG00000018740.14	chr11	68968131	68974365	Slc25a35	protein_coding	KNOWN	6235	301.84	-0.368238	-0.394093	0.146629	-2.51136	0.0120266	0.0291065	348.102	335.977	364.692	246.562	269.934	303.512	244.1
ENSMUSG00000018750.14	chr11	69765912	69784023	Zbtb4	protein_coding	KNOWN	18112	10369.4	0.316306	0.328521	0.0891872	3.54654	0.000390321	0.00146502	8931.02	9250.12	8960.82	10610.9	10616	12298.5	11918.4
ENSMUSG00000018761.14	chr11	69656697	69662642	Mpdu1	protein_coding	KNOWN	5946	2170.4	0.284338	0.280757	0.101328	2.80612	0.00501426	0.0137466	1900.01	1909.41	1989.87	2058.42	2266.17	2464.77	2604.19
ENSMUSG00000018765.5	chr11	69632990	69653297	Fxr2	protein_coding	KNOWN	20308	7008.53	0.054506	0.0514234	0.0836353	0.65171	0.514588	0.625273	6619.32	7068.22	6910.93	7140.32	7194.33	6740.49	7386.09
ENSMUSG00000018774.13	chr11	69664213	69666153	Cd68	protein_coding	KNOWN	1941	451.792	0.893097	0.914529	0.140019	6.37839	1.78962e-10	2.27079e-09	338.402	252.96	308.808	423.389	549.47	628.522	660.991
ENSMUSG00000018800.14	chr11	110269369	110337716	Abca5	protein_coding	KNOWN	68348	8951.42	1.26013	1.31208	0.125763	10.0199	1.24602e-23	6.90368e-22	4780.74	5033.8	4721.54	10350.6	10641.6	15070.6	12061
ENSMUSG00000018809.2	chr11	75348433	75405705	Smyd4	protein_coding	KNOWN	57273	1408.94	0.778544	0.866211	0.189122	4.11662	3.84463e-05	0.000184289	946.233	973.748	954.988	981.265	1523.58	2374.98	2107.77
ENSMUSG00000018841.17	chr11	82876434	82890614	Rad51d	protein_coding	KNOWN	14181	811.873	-0.610754	-0.626188	0.107092	-5.70306	1.17677e-08	1.12056e-07	972.098	1045.05	1031.98	732.213	670.034	598.171	633.564
ENSMUSG00000018844.6	chr11	82892124	82900801	Fndc8	protein_coding	KNOWN	8678	178.611	-1.25782	-1.34255	0.214508	-5.86376	4.52501e-09	4.59256e-08	284.516	258.82	276.106	129.507	142.969	89.7888	68.5675
ENSMUSG00000018845.14	chr11	82910550	82943403	Unc45b	protein_coding	KNOWN	32854	89.9835	0.555217	0.603811	0.218264	2.54378	0.0109659	0.0269117	64.6628	72.2742	71.1998	103.357	94.957	98.6413	124.793
ENSMUSG00000018846.8	chr11	35769484	35791285	Pank3	protein_coding	KNOWN	21802	7085.4	-0.0730756	-0.0616248	0.0974519	-0.749862	0.453338	0.568141	7172.19	7506.75	7097.63	8009.51	6809.17	6636.79	6365.81
ENSMUSG00000018848.4	chr11	35808381	35834506	Rars	protein_coding	KNOWN	26126	2559.71	-0.00874339	-0.00740513	0.0934266	-0.0935857	0.925438	0.950531	2562.8	2565.73	2573.13	2780.67	2635.32	2316.8	2483.52
ENSMUSG00000018849.6	chr11	35838400	35980527	Wwc1	protein_coding	KNOWN	142128	6231.39	0.0652365	0.086022	0.0963043	0.677399	0.498153	0.610544	5883.24	6424.59	5752.28	6342.11	6204.22	6055.06	6958.23
ENSMUSG00000018858.15	chr11	115403752	115412674	Ict1	protein_coding	KNOWN	8923	1132.61	-0.331836	-0.354131	0.116189	-2.85601	0.00429	0.0120084	1288.95	1240.38	1351.14	1073.41	1066.93	862.479	1044.97
ENSMUSG00000018861.8	chr11	115268024	115277050	Fdxr	protein_coding	KNOWN	9027	606.69	-0.143659	-0.155711	0.11538	-1.24509	0.213098	0.316516	690.815	586.983	655.286	535.462	574.01	631.051	573.225
ENSMUSG00000018882.12	chr11	97315716	97329920	Mrpl45	protein_coding	KNOWN	14205	1420.53	-0.494956	-0.484342	0.120917	-4.09336	4.25161e-05	0.000201563	1684.47	1758.02	1648.77	1438.28	1329.4	954.797	1129.99
ENSMUSG00000018899.16	chr11	53770014	53778374	Irf1	protein_coding	KNOWN	8361	484.491	-0.359808	-0.378045	0.121965	-2.95009	0.00317679	0.00929688	544.246	554.753	574.98	422.143	406.501	469.178	419.633
ENSMUSG00000018900.7	chr11	53864542	53891660	Slc22a5	protein_coding	KNOWN	27119	966.982	-0.0928839	-0.0902399	0.110232	-0.842622	0.39944	0.515961	1055.08	961.051	988.932	1007.42	875.952	971.237	909.205
ENSMUSG00000018906.14	chr11	54100095	54131665	P4ha2	protein_coding	KNOWN	31571	1149.5	0.125274	0.117706	0.100929	1.24121	0.21453	0.318138	1146.69	1023.56	1118.5	1095.83	1168.29	1310.16	1183.48
ENSMUSG00000018920.11	chr11	70453983	70459984	Cxcl16	protein_coding	KNOWN	6002	65.0656	0.37411	0.412226	0.238882	1.56608	0.117329	0.196516	46.3417	61.5307	56.2975	73.4704	70.4176	73.3486	74.0529
ENSMUSG00000018921.11	chr11	70392883	70410031	Pelp1	protein_coding	KNOWN	17149	2056.55	-0.347599	-0.353073	0.0982329	-3.53852	0.000402371	0.00150228	2369.89	2306.91	2366.57	2003.62	1931.15	1751.51	1666.19
ENSMUSG00000018923.13	chr11	70451919	70453727	Med11	protein_coding	KNOWN	1809	289.243	-0.25658	-0.267086	0.169101	-1.51732	0.129187	0.212436	311.459	320.35	328.678	308.825	295.54	189.695	270.156
ENSMUSG00000018927.3	chr11	83587882	83593087	Ccl6	protein_coding	KNOWN	5206	113.699	1.46624	1.657	0.237093	6.18423	6.24061e-10	7.33837e-09	58.1966	42.9738	51.744	90.904	113.095	177.048	261.928
ENSMUSG00000018931.3	chr11	60902246	60914750	Natd1	protein_coding	KNOWN	12505	779.244	-0.405192	-0.412861	0.106443	-3.80664	0.000140869	0.000592914	884.803	929.797	910.695	647.535	690.306	686.695	704.874
ENSMUSG00000018932.9	chr11	60932033	60952811	Map2k3	protein_coding	KNOWN	20779	1326.99	1.01561	1.22387	0.304384	3.33662	0.000848037	0.00292557	724.224	756.925	776.574	881.644	1708.16	2361.07	2080.34
ENSMUSG00000019122.8	chr11	83572919	83578636	Ccl9	protein_coding	KNOWN	5718	97.1725	1.60595	1.93229	0.292137	5.49724	3.85775e-08	3.37993e-07	29.0983	34.1837	48.4324	63.5083	99.2248	164.402	241.358
ENSMUSG00000019173.11	chr11	100715009	100738215	Rab5c	protein_coding	KNOWN	23207	7171.95	0.230959	0.22977	0.0806356	2.86424	0.00418016	0.0117602	6368.21	6645.32	6570.25	7662.09	7640.31	7384.18	7933.26
ENSMUSG00000019189.13	chr11	44518964	44565520	Rnf145	protein_coding	KNOWN	46557	5551.46	-0.12998	-0.127262	0.0791775	-1.64163	0.100667	0.173968	5674.16	6013.41	5811.06	5738.16	5600.33	5006.68	5016.4
ENSMUSG00000019302.16	chr11	101009452	101063719	Atp6v0a1	protein_coding	KNOWN	54268	38894.9	0.254709	0.248129	0.0954301	2.66907	0.00760627	0.0196878	36178.9	33048.8	36155.8	35715.3	40701.4	47664	42799.8
ENSMUSG00000019303.14	chr11	101091823	101095436	Psmc3ip	protein_coding	KNOWN	3614	488.025	-0.238126	-0.236995	0.142877	-1.66664	0.0955852	0.16648	518.38	564.52	519.924	476.935	424.639	392.036	519.742
ENSMUSG00000019368.13	chr11	4031462	4048024	Sec14l4	protein_coding	KNOWN	16563	54.8082	-0.178417	-0.202731	0.258903	-0.689127	0.490743	0.603458	63.5851	53.7173	60.437	53.5462	54.4136	41.7328	56.2254
ENSMUSG00000019373.11	chr11	59817795	59839838	Cops3	protein_coding	KNOWN	22044	2449.84	0.131493	0.13533	0.0886351	1.48353	0.137932	0.223508	2270.74	2373.33	2314.41	2485.54	2445.41	2596.29	2663.16
ENSMUSG00000019437.17	chr11	78176711	78181909	Tlcd1	protein_coding	KNOWN	5199	876.779	0.374762	0.388433	0.112609	3.328	0.000874703	0.00300358	711.291	789.156	735.179	951.379	944.236	943.415	1062.8
[truncated: 13,581 more rows]
