# Supplementary material for: Forniceal deep brain stimulation induces gene expression and splicing changes that promote neurogenesis and plasticity
Source: eLife. 2018 Mar 23;7:e34031. doi: 10.7554/eLife.34031 (PMC5906096; doi:10.7554/eLife.34031)
Supplement: Figure 1—source data 2. [file elife-34031-fig1-data2.xlsx]

## Sheet: DBS upreg. DEG_GO
ID	Term	Pvalue	FDR	No.ofGenes
GO:0009892	negative regulation of metabolic process	0	0	129
GO:0009890	negative regulation of biosynthetic process	5.48e-13	2.35e-10	84
GO:0031327	negative regulation of cellular biosynthetic process	5.51e-13	2.35e-10	83
GO:0031325	positive regulation of cellular metabolic process	1.83e-14	1.43e-11	134
GO:0031324	negative regulation of cellular metabolic process	0	0	125
GO:0023057	negative regulation of signaling	3.72e-12	1.39e-09	73
GO:0010629	negative regulation of gene expression	6.62e-12	2.22e-09	81
GO:0010648	negative regulation of cell communication	3.33e-12	1.3e-09	73
GO:0070887	cellular response to chemical stimulus	0	0	126
GO:0010941	regulation of cell death	2.1e-13	1.09e-10	86
GO:0042981	regulation of apoptotic process	7.59e-14	4.45e-11	82
GO:0009719	response to endogenous stimulus	6.42e-14	4.01e-11	86
GO:0010605	negative regulation of macromolecule metabolic process	0	0	121
GO:2000113	negative regulation of cellular macromolecule biosynthetic process	3.08e-13	1.44e-10	79
GO:0043067	regulation of programmed cell death	1.33e-13	7.35e-11	82
GO:0043066	negative regulation of apoptotic process	6.22e-15	6.48e-12	62
GO:0006366	transcription from RNA polymerase II promoter	1.74e-14	1.43e-11	103
GO:0043069	negative regulation of programmed cell death	1.35e-14	1.27e-11	62
GO:0071495	cellular response to endogenous stimulus	4.59e-12	1.66e-09	69
GO:0060548	negative regulation of cell death	3.71e-14	2.67e-11	65
GO:0006915	apoptotic process	6.63e-12	2.22e-09	92
GO:0009888	tissue development	0	0	107
GO:0071310	cellular response to organic substance	2.66e-15	3.12e-12	107
GO:0051172	negative regulation of nitrogen compound metabolic process	1.32e-12	5.37e-10	84
GO:0010033	response to organic substance	0	0	134
GO:0009605	response to external stimulus	2.2e-13	1.09e-10	96
GO:0009725	response to hormone	9.93e-12	3.21e-09	53
GO:0006357	regulation of transcription from RNA polymerase II promoter	1.55e-15	2.08e-12	103
GO:0010558	negative regulation of macromolecule biosynthetic process	6.17e-14	4.01e-11	83
