# Supplementary material for: Forniceal deep brain stimulation induces gene expression and splicing changes that promote neurogenesis and plasticity
Source: eLife. 2018 Mar 23;7:e34031. doi: 10.7554/eLife.34031 (PMC5906096; doi:10.7554/eLife.34031)
Supplement: Figure 1—source data 3. — The following information is provided in this table: coef.1 is the noise, coef.2 is the normalized population specific expression, coef.3 is the normalized relative differences between DBS and sham treatment, and pvalue.1, pvalue.2, and pvalue.3 indicate significance of coef.1, 2, or 3, respectively, as determined by the F-test in the linear regression analysis. [file elife-34031-fig1-data3.xlsx]

## Sheet: NPC specific DBS-altered genes
Gene name	coef.1	coef.2	coef.3	pvalue.1	pvalue.2	pvalue.3
Sdccag8	745.224	1376.65	-132.454	0.00960715	0.00109941	0.00118921
Colgalt2	-231.359	752.447	-92.4951	0.105966	0.002722	0.00116788
Igsf8	-3517.49	12435.3	-1388.03	0.191884	0.005644	0.00354255
Susd4	3268.93	7076.96	-771.358	0.0246992	0.00176449	0.00118846
Plekhm3	1000.9	2558.39	-319.132	0.0593327	0.00286299	0.00116318
Armc9	6.67809	2034.77	-337.251	0.988352	0.00988281	0.00146019
Smpd2	-209.018	1261.11	-120.835	0.430418	0.00669489	0.00730931
Cabin1	-0.874823	6759.21	-655.027	0.999529	0.00903087	0.00946206
Os9	-2184.01	9224.29	354.094	0.0314907	0.000180191	0.00637753
Ddo	61.2449	996.929	-298.684	0.782674	0.0093927	0.000138907
Nat9	-31.9165	588.955	-57.9863	0.49573	0.000174961	0.000173273
Prkar1a	-1401.15	45343.2	12317	0.820539	0.00156754	2.94717e-05
Blmh	540.559	3423.38	981.783	0.462821	0.00741345	0.00012655
Fasn	671.402	15644.7	3131.17	0.842398	0.00849256	0.000599999
Fn3k	-54.0205	1167.71	-322.953	0.432603	5.14001e-05	8.31507e-07
Trim17	62.3528	290.751	-59.6558	0.300548	0.00566147	0.000349766
Jag2	636.374	1282.38	-542.416	0.0638234	0.0074826	2.74775e-05
Mthfd1	-208.185	2801.54	-441.233	0.528148	0.000820931	0.000130249
Cdca7l	-20.9319	104.897	-38.3576	0.240518	0.00252907	1.49949e-05
Aldh6a1	719.91	3823.18	559.383	0.396618	0.00794561	0.00184814
Sstr1	-264.69	1583.91	-643.842	0.34996	0.00348871	1.39012e-05
Wdr35	-864.979	4406.34	-737.337	0.403128	0.00969395	0.00137878
Ppp6r2	1856.55	4568.61	-750.138	0.112599	0.00822222	0.00123874
Hdac10	-319.948	1161.6	-149.442	0.186565	0.00485496	0.00178593
Mgrn1	-7195.94	19091.7	4455.08	0.102201	0.00542839	0.000202015
Pot1b	85.5603	251.59	-112.827	0.0746629	0.00234035	6.1236e-06
Cyp4f14	-111.005	564.545	109.94	0.394802	0.00911131	0.000720668
Vars2	506.984	906.723	-311.005	0.0133118	0.00178323	1.33526e-05
Mapk14	-188.732	8221.32	-865.757	0.906018	0.00589945	0.00458566
Hsd17b4	1631	1805.88	-201.071	0.00775881	0.00588145	0.00372902
Lmnb1	-9.84768	539.582	-219.635	0.933273	0.0088596	3.87172e-05
Cep120	991.835	3515.22	-967.647	0.175999	0.00474116	9.09872e-05
Gnpda1	-8.48463	862.355	-287.252	0.963396	0.0083696	8.02979e-05
Nrxn2	5921.66	10329.2	1130.53	0.0231377	0.00365662	0.00244784
Hnrnpul2	5128.13	13474	2787.16	0.0200126	0.00065562	3.5186e-05
Ctsf	-513.729	3367.39	-237.873	0.346325	0.00241108	0.00799639
Cybrd1	69.8108	676.306	140.694	0.61724	0.00690334	0.000411336
Dhx35	-279.861	1506.23	-345.609	0.261395	0.00235728	8.8353e-05
Spg11	-379.334	2166.68	-235.394	0.398776	0.00624608	0.00433786
Tbr1	97.1152	3432.22	-1502.42	0.893615	0.00795941	2.57024e-05
Dclk2	2450.85	5575.41	-944.151	0.0429603	0.00289076	0.00036103
Aco1	28.9877	2147.41	-235.651	0.927631	0.00220156	0.00144882
Fam219a	344.185	5037.05	1196.64	0.665972	0.00265994	8.75271e-05
Cntfr	-1042.42	3840.12	438.309	0.0544648	0.000635678	0.000354747
Gba2	164.34	6043.81	-1442.18	0.839044	0.00147161	4.61283e-05
Ccdc30	-266.429	1297.52	-204.996	0.279683	0.00402933	0.000670274
Khdrbs1	-3414.41	11695.2	1774.51	0.171951	0.00513712	0.00101212
Pdp1	-2004.14	8628.35	1994.93	0.0654644	0.000450775	1.5396e-05
Prkag2	2017.1	5522.19	-393.554	0.0720667	0.0029038	0.00923553
Sparcl1	-17343.6	140056	17475.2	0.577348	0.00880244	0.00372689
Mkrn1	-1020.85	8352.78	845.879	0.583337	0.00890656	0.00799869
Dctn1	5477.46	18060.5	-1992.45	0.205473	0.00826898	0.00546653
Iqsec1	4645.69	5515.04	-924.679	0.00293949	0.00169197	0.000214616
H1fx	-129.601	735.734	-87.5625	0.420052	0.00762076	0.00381351
Adck2	211.219	700.271	-327.481	0.213407	0.00874549	2.19882e-05
D630045J12Rik	297.973	5024.94	-1120.98	0.773938	0.00718335	0.000327302
Eif3c	887.903	10227	2106.36	0.620213	0.00381209	0.000225181
9030624J02Rik	1447.53	2120.33	-239.033	0.0163262	0.00468393	0.00282195
Cog7	157.609	2958.61	-446.965	0.471282	0.000129288	2.35119e-05
Isoc2b	56.9446	282.402	-99.2783	0.350258	0.00690624	5.23181e-05
Slc35e1	1624.55	2591.53	1316.5	0.0333788	0.00770615	1.37111e-05
Itgb1	950.344	2954.64	1438.28	0.175701	0.00755852	1.58975e-05
Mast1	1363.54	1717.75	-597.544	0.00900359	0.00429733	3.23643e-05
Sidt2	-57.6783	5093.95	927.548	0.955465	0.0068698	0.000685569
Xylb	13.3341	443.446	-65.1012	0.857031	0.00336814	0.00073703
Ppcdc	259.016	473.034	-51.9077	0.00441468	0.000495933	0.000322097
Wdr6	-487.834	9305.25	-1703.19	0.762175	0.00380444	0.000356373
Mbtps2	1404.6	1930.38	-577.106	0.0154718	0.00556407	7.82191e-05
A230072C01Rik	-2.28178	427.49	44.7833	0.977206	0.00512413	0.00405239

## Sheet: NSC specific DBS-altered genes
Gene name	coef.1	coef.2	coef.3	pvalue.1	pvalue.2	pvalue.3
Dcbld1	200.762	794.349	-443.612	0.125787	0.00375656	0.000483056
Pitrm1	985.878	1462.79	-540.477	0.00655103	0.00363837	0.00226427
A330102I10Rik	-86.4345	517.312	-280.474	0.0437891	0.000160054	2.11678e-05
Card6	-164.545	1118.85	-890.383	0.344188	0.00445855	0.000145247
Dnph1	-18.3258	232.807	-119.882	0.614025	0.0053294	0.000957001
Tars2	1020.56	1654.37	-957.853	0.0136498	0.00568233	0.000652792
Elovl1	31.8555	545.283	-167.439	0.69425	0.00457649	0.00562918
Klhdc7a	-510.711	2111.75	-748.471	0.208977	0.00802199	0.00590399
Atp2b2	14160.8	24780.5	-14150.3	0.0279824	0.0094601	0.0011963
Iglon5	586.247	1784.86	-909.489	0.12673	0.00971299	0.00189575
Josd2	129.928	1593.19	-657.008	0.507882	0.00212319	0.000860636
Siae	299.88	1133.97	-660.733	0.0416316	0.000893314	9.16729e-05
Pdzd3	-44.4305	313.652	-193.094	0.416707	0.00716132	0.000661379
Hemk1	82.3531	933.763	-494.303	0.551458	0.00429261	0.000684197
Zcchc5	113.535	860.438	-863.382	0.415221	0.00548729	7.2972e-05

## Sheet: Mossy cell specific DBS genes
Gene name	coef.1	coef.2	coef.3	pvalue.1	pvalue.2	pvalue.3
Lancl1	4299.66	6622.33	-1026.14	0.00131185	0.000420173	0.00226443
Serpine2	3933.33	6041.2	1288.89	0.0176275	0.00642996	0.00982879
Acsl3	6465.69	5819.86	1294.06	0.00235114	0.00570556	0.00756573
Hes6	67.1336	730.685	-346.565	0.636601	0.0083488	0.00067004
Gm16701	56.8886	300.815	-34.712	0.0895356	0.000502391	0.00784165
Mterf2	95.4752	842.345	-247.491	0.515804	0.00539309	0.00259337
Fam229b	252.08	453.346	-161.355	0.0315132	0.00701551	0.00166348
Ccm2	-909.845	3035.08	547.611	0.0785799	0.002392	0.0068528
Igfbp3	-244.268	1214.64	-310.898	0.179692	0.00213763	0.00169508
Wbp2	6303.47	14238.7	-2237.83	0.013972	0.0011883	0.005789
Pdk2	1320.09	4871.35	-1579.92	0.1348	0.00382972	0.00125325
Cd300lf	4.89608	95.5351	-17.6384	0.703051	0.00222129	0.00588087
Selm	-1016.49	5008.05	-1089.91	0.113419	0.000966463	0.00141856
Galnt16	4532.04	10580.6	-2758.91	0.0671041	0.00706271	0.00530033
4930427A07Rik	-16.8517	133.913	-29.6082	0.487542	0.0061006	0.0082424
Gm5441	-22.7713	187.829	-55.9624	0.507341	0.00636221	0.00292175
Cd83	-124.162	915.797	-159.834	0.197828	0.000577944	0.00197232
Tbc1d7	58.3493	651.913	-239.905	0.6225	0.00654726	0.00136184
Psmg4	44.4161	283.907	-58.2335	0.162244	0.000673101	0.0012426
Clybl	467.83	440.802	127.12	0.00190751	0.00394787	0.002017
Grid1	1884.1	3206.34	-1236.67	0.0255594	0.00672246	0.00117143
Ubac2	543.786	2163.69	-268.574	0.0114889	0.000104927	0.00137541
Selk	-1275	5667.81	1103.47	0.178983	0.00321981	0.00694831
Sult4a1	7827.59	10482.4	2853.29	0.0123199	0.00716193	0.00460142
Wnt7b	1205.41	2386.22	-1236.29	0.0548532	0.00972649	0.000563934
Tfap4	10.4981	239.91	-179.71	0.768783	0.00329411	4.05433e-05
Brd2	-6977.8	25042.5	13050.8	0.0747123	0.00168865	8.39877e-05
Pacsin1	10255	14902.9	-3159.4	0.00250177	0.00101863	0.00165035
Smim3	-344.358	1536.16	-416.405	0.0343183	0.000252143	0.000158102
A730017C20Rik	1127.58	1717.6	-830.249	0.0178795	0.00672488	0.000491421
Pcdhac1	-64.7092	428.751	-174.493	0.330748	0.00306947	0.000414696
Rps6ka4	709.36	2386.34	-854.884	0.183884	0.00923902	0.002179
Ak1	2302.3	3339.12	-1361.61	0.000561491	0.000224206	2.7938e-05
Tspan18	435.785	5225.65	-2436.92	0.659844	0.00767343	0.000652132
Syt13	5315.71	12498.4	-6096.81	0.0662498	0.00677061	0.00047785
Psma7	1605.46	2882.89	357.434	0.00244732	0.000440075	0.00537366
Zhx3	3231.54	5302.1	-1269.73	0.0137426	0.00386496	0.00393563
Trp53i11	2948.56	5871.21	-1870.45	0.0348184	0.00547863	0.00194695
Myh7b	-284.417	1367.58	-192.394	0.1255	0.00125832	0.00904191
Ankef1	42.704	75.5163	-34.9133	0.0404565	0.00995956	0.000898121
Zfp362	609.651	1369.02	-1046.73	0.0601039	0.00701556	8.53362e-05
Grhpr	162.218	1341.97	-381.455	0.528213	0.00759598	0.00417467
Thap3	199.261	770.707	-471.212	0.232704	0.00902084	0.000272134
Yipf1	401.711	1728.84	-356.939	0.0455312	0.000420903	0.000761824
Gm13127	-25.4129	117.794	-42.6986	0.297654	0.00840768	0.0018839
Nudt9	528.293	1677.65	-505.958	0.102637	0.00427598	0.00185028
Magi2	3222.65	5602.16	-1600.49	0.0224598	0.0053856	0.00287415
Svop	3778.59	6971.15	-2264.83	0.00369204	0.000609354	0.00018915
Lamtor4	-199.775	1864.93	-365.587	0.519555	0.00454916	0.00944934
Npy	-139.259	1949.27	339.327	0.445227	0.000495007	0.0017131
Wdr54	255.748	453.044	-146.132	0.0221037	0.00494125	0.00166819
Pianp	3817.99	5219.43	-2229.37	0.00991121	0.0053049	0.000614163
Elmod3	24.9515	1668.34	-545.693	0.937663	0.00829911	0.00272948
Clip3	11628.9	14189.5	-3934.93	0.000367863	0.000287929	0.000165195
Ttyh1	13241.4	15405.4	8309.53	0.00764694	0.00724786	0.000348215
Coro1a	1068.58	3749.36	1242.89	0.149977	0.00552462	0.00169084
Capn5	21.9495	5869.29	-1267.81	0.978794	0.00273225	0.00407085
B4galnt4	1629.16	4198.02	-1504.01	0.0695333	0.00520263	0.00118191
Rps13	1679.13	2603.57	637.807	0.00667208	0.00220449	0.00206248
Gpt2	-1123.56	6569.42	-1557.62	0.288478	0.00336143	0.00355127
Pgbd5	6177.27	15346.6	-9242.14	0.032774	0.00225627	6.42997e-05
P4htm	1234.43	2935.19	-1224.35	0.0758197	0.00780204	0.00101958
Panx1	-10.1055	1122.7	-222.712	0.951693	0.00334157	0.00673699
Ppib	934.801	1128.52	-252.306	0.00765352	0.00635997	0.00825757
Morf4l1	3522.99	6190.94	1222.07	0.0103203	0.00219636	0.00456837
Lage3	172.964	430.524	-216.73	0.0967652	0.00934836	0.000603117
Tceal3	2049.27	5216.85	-1229.59	0.087386	0.00746738	0.00803782
Mageh1	-179.31	2883.53	-600.787	0.708253	0.00486172	0.00813907

## Sheet: Granule cell specific DBS genes
Gene name	coef.1	coef.2	coef.3	pvalue.1	pvalue.2	pvalue.3
Arpc2	-3240.44	24706.7	12809.9	0.403556	0.00374728	0.000590472
Obsl1	670.509	1100.64	318.952	0.0134875	0.00413653	0.00580194
Ptma	-1081.07	16782.1	13320.6	0.716628	0.00674036	0.000211393
Kif26b	1131.02	4921.77	-2687.47	0.151888	0.00281048	0.000356848
B3galt2	-955.63	5643.23	-1852.31	0.0855093	0.00033479	0.000296375
Igsf8	3656.25	5767.03	-2085.36	0.0162165	0.00583234	0.00366247
Cnst	1507.86	2397.03	-1324.88	0.000336904	0.000102669	1.14806e-05
Bag2	159.762	307.797	-142.081	0.00408359	0.000630273	0.000147439
Gm5069	39.6802	237.609	-110.342	0.346345	0.0055536	0.00136473
Asb18	110.374	265.346	-134.665	0.0614647	0.00618292	0.00109034
Pttg1ip	621.839	3651.4	3018.25	0.313475	0.00450686	0.000116136
Moxd1	390.577	737.214	-200.061	0.0272126	0.00543958	0.00955691
Eef2	24300.4	48904.2	8997.14	6.11263e-05	7.18973e-06	6.3373e-05
Tspyl1	5515.46	6652.33	2275.35	0.00835318	0.00760506	0.005876
Foxo3	-1740.43	8190.44	2350.41	0.226678	0.00462522	0.00670425
Rap1b	1707.93	2246.09	3578.66	0.00142966	0.000928393	1.60043e-06
Polr2a	-3349.54	12768.2	3057.58	0.0434987	0.000696885	0.00205727
Ttc25	12.103	60.1969	-20.104	0.189433	0.00259932	0.00216802
Hap1	4777.88	12286.1	-2398.92	0.0237347	0.00147223	0.00881135
Pitpna	-7045.83	25885.4	8212.98	0.00940107	0.000125938	0.000127294
Hbq1a	-54.9927	224.631	-93.9652	0.0589288	0.000806932	0.000278971
Slc9a3r1	1317.64	1536.52	391.85	0.00125952	0.001294	0.00297166
Tmem107	64.0872	423.776	-178.728	0.426293	0.00759075	0.00272547
Myh10	-11013.7	31501.8	6572.05	0.0128624	0.000479134	0.00239942
Alyref	45.2733	1751.11	340.348	0.737196	0.000290417	0.00193246
Emid1	136.219	204.176	51.4837	0.00852856	0.00354493	0.00819181
Tbkbp1	9.22401	7625.42	720.85	0.977235	2.8351e-05	0.00315111
Mgat5b	1671.68	4302.66	-1318.27	0.00322105	0.000158258	0.000183499
4933415A04Rik	-2.63038	108.254	-89.6339	0.901678	0.00995172	0.000276495
Camk2b	52181.7	79086	-9909.65	0.00079315	0.000294899	0.00967122
Gm11944	21.2274	97.3898	-40.5483	0.0362344	0.000266842	9.26771e-05
Cdca7l	24.2851	66.3144	-45.9674	0.0353581	0.00190581	9.30457e-05
Sstr1	359.515	1068.81	-767.969	0.0339961	0.00131531	5.47971e-05
Arid4a	57.6171	4351.87	-1196.86	0.917901	0.00212567	0.00365173
F730043M19Rik	1504.69	5519.85	-2968.66	0.109207	0.00303366	0.000410186
Plekhd1	111.883	748.24	-321.851	0.314299	0.00281311	0.000899202
Wdr35	1502.64	2244.46	-1007.99	0.0134315	0.0057972	0.0016211
2810029C07Rik	10.1215	601.861	-317.225	0.906955	0.00324123	0.000475586
Gm16596	-16.211	94.482	-32.7639	0.225209	0.0020673	0.00149347
Klf6	-261.201	1854.88	373.627	0.289443	0.00179934	0.00951168
Wnk2	2775.02	5011.84	-987.887	0.000112837	2.05162e-05	0.000136529
Cmya5	88.161	224.608	-52.8321	0.0294802	0.0019782	0.0060099
Zfp459	23.5218	178.941	-120.003	0.38201	0.00313939	0.000179447
Stc1	71.4458	749.548	-537.935	0.572726	0.00539771	0.000246049
Gdf10	286.566	950.083	-481.388	0.000587558	9.80745e-06	1.53239e-06
Slc1a3	22511.6	27723.9	7495.31	0.00101099	0.000842643	0.00156819
Atad2	357.23	742.797	-357.866	0.0571902	0.00940813	0.00208331
Josd1	767.858	4383.34	855.755	0.139263	0.000860691	0.00534758
Card10	465.804	1084.92	-425.158	0.0450282	0.00464906	0.00215203
Tmem74	-995.834	2431	1110.16	0.0328537	0.00264811	0.000670916
Chadl	210.505	439.008	-113.007	0.0302054	0.00427818	0.00912071
Krt2	-39.765	1101.64	-248.794	0.78348	0.00227374	0.00792508
Tfap4	54.6664	192.176	-172.627	0.0802957	0.00222417	3.92575e-05
Bcl6	-521.259	5647.64	-1642.91	0.39978	0.000967332	0.00136134
Mcm4	41.5621	833.048	-299.966	0.544358	0.000350463	0.000215968
Arl6	295.66	1207.25	667.354	0.230719	0.00798468	0.00103568
Cldnd1	166.851	3872.19	3161.8	0.675672	0.000879817	2.17339e-05
Ece2	728.156	2885.21	-947.442	0.214885	0.00766328	0.00684982
Senp2	2743.8	4621.1	3434.94	0.0168964	0.0048135	0.000189384
Dyrk1a	2269.45	5204.32	2372.61	0.0421401	0.00452897	0.00118141
Ubald1	-1652.88	7583.05	2404.6	0.221842	0.00484418	0.00490223
Chaf1a	73.7524	145.199	-65.3756	0.035409	0.00635791	0.0017697
Map3k4	2118.68	3921.73	-2016.08	0.00386325	0.000693778	0.000106403
Ppp1r18	151.43	228.498	153.523	0.0196245	0.00838624	0.000515353
Tcf19	43.3683	65.6745	-27.6773	0.0169715	0.00708415	0.00254176
Impact	-5277.89	18942.2	3062.11	0.00033688	4.04062e-06	5.96754e-05
Cidea	60.3048	455.194	-56.4685	0.0978534	0.000158629	0.00572611
Isoc1	900.953	1372.58	-407.566	0.00365475	0.0013804	0.00179244
Ablim3	1605.67	3140.33	-671.612	0.00637313	0.000955356	0.00423935
Ctdp1	638.94	642.734	207.324	0.00208284	0.00370271	0.00351952
Apcdd1	1016.08	1784.56	-1079.05	0.0261176	0.00671924	0.00060812
Tle4	2799.42	2822.55	1204.67	0.0014555	0.00258357	0.000848608
Gldc	1613.44	1556.15	456.583	0.000506885	0.00108227	0.00147301
Pip5k1b	2024.96	2922.25	-590.66	0.00248047	0.00113911	0.00614056
Plcb3	667.224	602.765	223.851	0.00385231	0.00984278	0.00569604
Aldh18a1	-325.997	1843.15	-195.532	0.0357837	0.000115563	0.00750892
Gfra1	2781.57	5440.36	-1795.49	0.0355756	0.00654486	0.00573933
Pi4k2a	2341.09	2994.01	1652.66	0.00595551	0.004376	0.000546005
Fgfbp3	-91.8806	460.374	-105.444	0.162822	0.00188497	0.00631401
Chp1	2738.48	5887.49	1900.08	0.0642167	0.00970929	0.00923747
Dhtkd1	119.923	582.988	-144.093	0.193573	0.00295517	0.00738798
Ppp6c	-83.1198	5450.26	2643.9	0.867768	0.00058241	0.000111886
Pfkfb3	1107.64	2618.12	676.045	0.0408931	0.00390643	0.00826936
Grb14	802.768	2107.54	-938.178	0.0575018	0.0041175	0.0011712
Fastkd1	42.2215	1478.09	-561.449	0.878645	0.00834066	0.00442131
Tspan18	1792.98	3730.36	-2198.16	0.0340797	0.00498025	0.000486535
Slc27a2	49.0619	414.065	-159.065	0.414008	0.00281873	0.00138765
Tbr1	1249.58	2547.49	-1813	0.00158274	0.000187558	7.71851e-06
Zscan29	299.287	438.807	-149.685	0.00945831	0.00428395	0.00331684
Plekho1	-596.62	1774.43	405.887	0.0387803	0.00155093	0.00526927
Lrrcc1	861.349	1399.44	-815.941	0.0160667	0.00518995	0.000529867
Extl2	1609.21	4966.52	-1826.02	0.107387	0.00555615	0.0032778
Tdo2	247.721	1123.44	-591.654	0.181473	0.00336323	0.000495991
Egf	21.1831	115.097	-74.8382	0.324106	0.00652658	0.000444584
P2ry13	445.515	392.069	224.745	0.00245676	0.00704172	0.000786142
Ankrd13c	-74.2409	7890.32	2984.49	0.895926	0.000227785	0.000115384
Npnt	1580.89	6800.4	-3278.52	0.083639	0.00110102	0.000219806
Foxo1	226.34	5085.64	-1564.76	0.734932	0.00225655	0.00255684
Ube2d3	7164.08	10106.6	10480.2	0.000942549	0.000464488	4.34265e-06
Fam188b2-ps	16.3371	130.818	-73.9584	0.518783	0.0085358	0.00102194
Sdcbp	4610.93	14537.3	13675.4	0.0901041	0.0039466	6.03617e-05
Tex10	101.401	1623.57	423.14	0.643924	0.00243775	0.00507739
Txndc12	-195.723	1467.17	427.262	0.375842	0.00314369	0.00435031
Hivep3	246.612	4937.8	1780.03	0.784155	0.00752322	0.00480761
Ccdc30	442.833	647.187	-282.986	0.00687795	0.00310828	0.00093622
Cap1	6966.12	13488.5	7487.13	0.0213229	0.00375064	0.000453718
Ppt1	2739.94	4985.02	879.43	0.004125	0.000794378	0.00713249
Tal1	-15.1879	116.516	88.0862	0.26008	0.00102119	3.44389e-05
Yrdc	-249.771	1427.33	555.231	0.0424238	0.000138866	6.27932e-05
Grhpr	610.1	842.482	-296.384	0.01345	0.00767938	0.00536302
Marcksl1	60.5401	8046.16	5205.06	0.958021	0.00317267	0.00020902
Fam110b	-183.376	2935.34	-907.517	0.583422	0.00125108	0.00139497
Sepn1	395.589	1371.63	-579.959	0.12078	0.00438626	0.0015213
Gm13127	6.19692	82.867	-37.0885	0.528902	0.00142869	0.000383945
Ccl27a	481.718	1655.09	276.234	0.00286793	4.4685e-05	0.000562788
Cyp51	-2990.91	7520.73	5926.75	0.08811	0.00860294	0.000284915
Ppp1cc	1615.59	4552.69	1506.45	0.0889588	0.00582068	0.00505202
Sbds	-666.811	3749.23	1709.73	0.303882	0.00485691	0.00126995
Plb1	25.0374	238.44	-84.3235	0.531436	0.00516321	0.00350972
Adamts3	557.438	1347.42	-325.575	0.0279411	0.00225886	0.00619516
3110082I17Rik	133.824	421.09	-161.093	0.0812061	0.00341367	0.00171497
Gm3510	14.1616	176.427	-68.0705	0.568673	0.00276213	0.00133692
D130017N08Rik	280.929	665.27	-217.628	0.0609274	0.00645033	0.00583841
Gm42984	18.283	82.0275	-41.7042	0.236597	0.00602986	0.0010543
Crhr2	-55.9216	232.305	-77.9537	0.233573	0.00771298	0.00638246
Calu	-4083.23	11421.2	5323.01	0.1048	0.00760646	0.00187924
Tspan11	115.017	272.546	-137.864	0.0271943	0.00235562	0.000399669
Lrrn1	3161.16	8227.75	-5671.23	0.0828373	0.00698386	0.000381528
Ntf3	-159.933	1302.64	-719.863	0.467984	0.00513852	0.000645073
Nap1l5	-6208.73	19149.5	3521.4	0.0197259	0.000588409	0.00464646
Elmod3	514.457	1125.82	-457.098	0.0210034	0.00234215	0.000929263
Gm19265	5.90736	56.8531	-18.3811	0.458224	0.00255298	0.00240412
Zim1	209.83	781.101	-326.306	0.181644	0.0068931	0.00255198
Paf1	2055.07	1491.81	1024.7	0.000515653	0.00320689	0.000167064
Ppp4c	557.588	1168.68	557.467	0.0175629	0.00224254	0.000477055
Abhd2	98.0414	8089.24	6148.42	0.920729	0.00174043	5.87727e-05
Inpp5f	-3241.23	9986.02	3217.37	0.0944508	0.00460434	0.00439757
Ntn5	254.659	520.183	-195.692	0.0116015	0.00155336	0.000819189
Gm10605	265.918	501.265	-373.313	0.0102475	0.00183617	6.73889e-05
Samd4b	-1135.45	6141.56	3656.56	0.0205062	6.82115e-05	5.65176e-06
Nfix	6185.39	9648.76	-3415.78	0.00202531	0.000686366	0.000453873
Saraf	85.7466	14728.5	3906.78	0.920839	0.000101824	0.000208215
Smarca5	1881.81	3566.07	7278.09	0.0126496	0.00226672	1.5241e-06
Cotl1	801.919	4025.65	-1068.68	0.0174755	7.55201e-05	0.000154194
Chst5	2.35322	65.4543	-27.676	0.811602	0.0038137	0.00131558
Acd	-379.809	2173.79	244.664	0.0143417	3.55241e-05	0.00203217
Gm26721	-15.8303	331.037	-132.796	0.787305	0.00680656	0.0029283
Grm2	-669.457	9074.99	-5830.95	0.682762	0.00709546	0.000510031
Sc5d	323.939	2765.59	1668.58	0.480929	0.00485543	0.000432004
Rab27a	159.82	979.092	-383.776	0.305342	0.00359599	0.00165034
Zbtb38	1451.75	3473.01	-2347.1	0.0287456	0.00242932	0.000132727
Arhgap20	3781.55	6604.98	-4463.65	8.35567e-05	1.73144e-05	8.57973e-07
Ddx3x	-3618.24	23585.9	13771.2	0.313678	0.00307647	0.000302189
Otud5	2792.3	3296.01	1474.62	0.00416416	0.00408777	0.00114027
Gm4779	-33.9862	149.865	-72.6117	0.242244	0.00675408	0.00142957
Zcchc5	86.8931	817.666	-796.408	0.53675	0.00566402	7.79747e-05
Jpx	172.089	305.744	-206.027	0.0295811	0.00743068	0.000445968
