# Supplementary material for: Forniceal deep brain stimulation induces gene expression and splicing changes that promote neurogenesis and plasticity
Source: eLife. 2018 Mar 23;7:e34031. doi: 10.7554/eLife.34031 (PMC5906096; doi:10.7554/eLife.34031)
Supplement: Figure 2—source data 1. [file elife-34031-fig2-data1.xlsx]

## Sheet: WT.WT
TranscriptID	GeneID	Type	DESeq_Log2FC	DESeq_AdjP	Sleuth_Log2FC	Sleuth_AdjP
ENSMUST00000151129	Prdx1	protein_coding	0.641261	0.106844	0.870297	0.239254
ENSMUST00000110582	Jrkl	protein_coding	-0.829817	0.000227298	-0.891817	0.000396958
ENSMUST00000110583	Ccdc82	protein_coding	0.0951095	0.758735	0.0683475	0.873918
ENSMUST00000188330	Ktn1	protein_coding	0.77461	0.262098	0.931881	0.907444
ENSMUST00000110586	Casc4	protein_coding	0.438489	0.622253	0.617643	0.8948
ENSMUST00000192677	Pcdh11x	protein_coding	-0.205613	0.845442	-1.46556	0.791834
ENSMUST00000151121	Arhgef1	protein_coding	-0.902299	0.10812	-1.01948	0.334362
ENSMUST00000151120	Ctsd	protein_coding	0.212038	0.0274342	0.210188	0.0967361
ENSMUST00000166083	Vwa3a	protein_coding	-0.981821	0.063274	-1.2199	0.197157
ENSMUST00000135552	Slc25a19	protein_coding	-0.489618	0.0679936	-0.496568	0.092389
ENSMUST00000151127	Fbxo44	protein_coding	-0.342467	0.225166	-0.356422	0.204998
ENSMUST00000018851	Dync1h1	protein_coding	-0.0510947	0.786008	-0.0558236	0.815538
ENSMUST00000110585	Skp2	protein_coding	-1.00251	0.000630917	-1.09739	0.00147627
ENSMUST00000207020	Fam57b	protein_coding	-0.427311	0.304306	-0.409464	0.457047
ENSMUST00000165826	Lrch3	protein_coding	-0.188797	0.771368	-0.317061	0.79018
ENSMUST00000090457	4930451G09Rik	protein_coding	-0.477272	0.0885029	-0.488076	0.116796
ENSMUST00000134824	Srsf1	protein_coding	0.305767	0.128882	0.334002	0.130223
ENSMUST00000196740	Slc35f6	protein_coding	1.05267	0.0011719	1.11975	0.00321048
ENSMUST00000196742	Camkk2	protein_coding	0.0763959	0.9143	0.0379992	0.971005
ENSMUST00000196745	Dclk1	protein_coding	-0.365175	0.00855202	-0.361942	0.229706
ENSMUST00000166082	Chid1	protein_coding	-0.375861	0.515227	-0.524782	0.782552
ENSMUST00000169196	Hmgcr	protein_coding	2.78431	2.45428e-12	3.44219	1.0456e-06
ENSMUST00000178238	Tmem52	protein_coding	0.0507085	0.962806	-0.0853972	0.982053
ENSMUST00000169190	Bend4	protein_coding	0.869395	0.218634	2.69067	0.511142
ENSMUST00000178235	Aamp	protein_coding	0.171711	0.554076	0.172078	0.681684
ENSMUST00000178231	Adat3	protein_coding	-0.169002	0.619102	-0.160498	0.727897
ENSMUST00000169198	Gpr35	protein_coding	0.269469	0.662013	0.319493	0.736092
ENSMUST00000052431	Armcx6	protein_coding	0.437013	0.00815309	0.449155	0.0430291
ENSMUST00000052437	Lrrc25	protein_coding	0.51672	0.438175	0.643387	0.61315
ENSMUST00000090095	Oxr1	protein_coding	0.0839671	0.943232	-1.56758	0.813753
ENSMUST00000092969	Sat2	protein_coding	-0.316775	0.738348	-2.10761	0.71718
ENSMUST00000049836	Specc1	protein_coding	-0.167005	0.317942	-0.165331	0.436845
ENSMUST00000166580	Elmod1	protein_coding	-0.244323	0.60473	-0.275129	0.80852
ENSMUST00000195258	Ptch1	protein_coding	0.459806	0.0984478	0.434628	0.177666
ENSMUST00000212869	Sash1	protein_coding	0.00350617	0.995542	-0.0660234	0.940952
ENSMUST00000007130	Ctnnb1	protein_coding	0.179627	0.116219	0.174093	0.261759
ENSMUST00000111187	Bcl7b	protein_coding	0.257649	0.736062	0.253747	0.861807
ENSMUST00000111186	Dnmt3a	protein_coding	-0.305482	0.745383	-2.42598	0.735343
ENSMUST00000111183	Pdhx	protein_coding	0.0990525	0.845267	0.106184	0.890613
ENSMUST00000090180	Sema3g	protein_coding	0.34164	0.234646	0.395331	0.0983183
ENSMUST00000165829	Rgag1	protein_coding	-0.188579	0.652231	-0.227186	0.630742
ENSMUST00000123879	Txndc16	protein_coding	0.323959	0.559206	0.368674	0.728503
ENSMUST00000043961	Abca5	protein_coding	1.22443	3.53736e-18	1.23797	1.3604e-13
ENSMUST00000043962	Cdc16	protein_coding	-0.0955811	0.602566	-0.104378	0.613428
ENSMUST00000094604	Galk2	protein_coding	0.142893	0.48924	0.13587	0.585933
ENSMUST00000043964	Wfs1	protein_coding	0.0597361	0.88159	-0.00817455	0.991906
ENSMUST00000123874	Coro1b	protein_coding	-0.112794	0.88647	-0.224461	0.80387
ENSMUST00000043966	Mrpl47	protein_coding	-0.378813	0.129754	-0.397109	0.163186
ENSMUST00000091132	Phyhd1	protein_coding	0.330756	0.310585	0.400675	0.358308
ENSMUST00000201077	Rogdi	protein_coding	-0.495883	0.340725	-0.426486	0.72505
ENSMUST00000020243	Ascl1	protein_coding	0.18609	0.563512	0.184425	0.583507
ENSMUST00000020463	Ncln	protein_coding	-0.226396	0.200715	-0.232027	0.29612
ENSMUST00000040986	Rubcn	protein_coding	0.367319	0.635583	0.184202	0.964104
ENSMUST00000160369	Ercc1	protein_coding	0.2118	0.57622	0.294546	0.497252
ENSMUST00000076810	Kalrn	protein_coding	-0.124584	0.734695	-0.170654	0.789769
ENSMUST00000176278	Zbtb25	protein_coding	-0.186476	0.788441	-0.292191	0.770867
ENSMUST00000160360	Hipk2	protein_coding	-0.0313515	0.955611	-0.0746283	0.945743
ENSMUST00000019026	Mrpl45	protein_coding	-0.45695	0.00373573	-0.476645	0.00128584
ENSMUST00000174259	Psme1	protein_coding	0.127842	0.515189	0.106751	0.705692
ENSMUST00000076813	Iah1	protein_coding	-0.013323	0.974168	-0.0277353	0.962405
ENSMUST00000207023	Kdm3a	protein_coding	-0.0039925	0.996075	-0.242261	0.962405
ENSMUST00000115259	Tmem60	protein_coding	-0.399539	0.0742719	-0.418453	0.0338162
ENSMUST00000115258	Zcchc12	protein_coding	0.283308	0.324146	0.267363	0.56923
ENSMUST00000065600	BC048403	protein_coding	-0.866882	0.000177343	-0.920901	2.99111e-05
ENSMUST00000115251	Tnpo3	protein_coding	-0.652047	0.187258	-0.981378	0.720389
ENSMUST00000115250	Tspan33	protein_coding	-0.710033	0.0184126	-0.786352	0.0641291
ENSMUST00000115256	Zcchc12	protein_coding	1.00319	0.00127501	1.04579	0.0483821
ENSMUST00000143249	Nmd3	protein_coding	0.113249	0.922319	0.041275	0.990608
ENSMUST00000064099	Ppp6r1	protein_coding	0.111409	0.294946	0.110235	0.518773
ENSMUST00000089161	Tnfrsf13c	protein_coding	-0.168837	0.760876	-0.196689	0.756106
ENSMUST00000198029	Camkk2	protein_coding	-0.449129	0.00796326	-0.464885	0.00402965
ENSMUST00000025601	Lpxn	protein_coding	0.214887	0.671033	0.206005	0.751173
ENSMUST00000198027	Rbm8a	protein_coding	0.537642	0.378656	0.663257	0.539883
ENSMUST00000064091	Ptpn4	protein_coding	-0.100424	0.507998	-0.107963	0.545764
ENSMUST00000205316	Cd2bp2	protein_coding	0.486102	0.313301	0.41295	0.872315
ENSMUST00000197901	Tdrkh	protein_coding	-0.206371	0.802873	-0.538106	0.966489
ENSMUST00000119161	Tpr	protein_coding	-0.162243	0.783268	-0.0725569	0.969314
ENSMUST00000136451	Araf	protein_coding	0.0301386	0.922968	0.0202589	0.97096
ENSMUST00000114694	Zbtb20	protein_coding	0.027854	0.938885	0.0174222	0.980468
ENSMUST00000093375	4930432K21Rik	protein_coding	-0.108826	0.922469	1.85804	0.690231
ENSMUST00000093374	Nf2	protein_coding	-0.110524	0.839183	-0.0840442	0.923939
ENSMUST00000200840	N4bp2l1	protein_coding	-0.13116	0.737907	-0.17319	0.7049
ENSMUST00000040687	Tax1bp3	protein_coding	0.000916248	0.998241	-0.00472051	0.995084
ENSMUST00000040689	Atg9a	protein_coding	-0.0946081	0.777175	-0.091451	0.880523
ENSMUST00000159026	Lmo7	protein_coding	-0.495989	0.151383	-0.616896	0.149784
ENSMUST00000073054	Mppe1	protein_coding	-0.654456	9.60088e-07	-0.671039	2.7744e-05
ENSMUST00000010506	Rdm1	protein_coding	0.500731	0.106028	0.572955	0.0404031
ENSMUST00000065329	Tmem248	protein_coding	-0.141659	0.765056	-0.118151	0.941403
ENSMUST00000010502	Ifi35	protein_coding	0.185542	0.718846	0.156855	0.793965
ENSMUST00000188489	Zfp207	protein_coding	-0.240483	0.226349	-0.239813	0.29465
ENSMUST00000199377	Eif3b	protein_coding	0.436661	0.0302965	0.438498	0.12927
ENSMUST00000048054	Chtf18	protein_coding	0.163515	0.830704	0.148637	0.895041
ENSMUST00000020969	Cmpk2	protein_coding	-0.467656	0.0017293	-0.469739	0.00178982
ENSMUST00000048050	Tmem45b	protein_coding	0.0961088	0.928361	0.0485041	0.980791
ENSMUST00000048052	Fam26d	protein_coding	0.720543	0.00636235	0.693708	0.00771276
ENSMUST00000076258	Ppm1m	protein_coding	-0.578856	0.372832	-0.86345	0.48213
ENSMUST00000040538	Sccpdh	protein_coding	0.182723	0.367164	0.175717	0.477587
ENSMUST00000163048	Krr1	protein_coding	-0.342649	0.0155153	-0.359986	0.00696491
ENSMUST00000163047	Luc7l2	protein_coding	0.328122	0.226065	0.256317	0.74319
ENSMUST00000153194	Phtf2	protein_coding	0.329603	0.619102	0.301612	0.815262
ENSMUST00000153191	Chid1	protein_coding	0.423433	0.535971	0.445748	0.855824
ENSMUST00000174282	Syncrip	protein_coding	0.371708	0.0206753	0.365055	0.0261278
ENSMUST00000051477	Cdc42	protein_coding	0.370087	7.91634e-08	0.367566	0.000818863
ENSMUST00000020967	Pfn4	protein_coding	-0.262756	0.29493	-0.296771	0.311744
ENSMUST00000102914	Zmiz2	protein_coding	0.0258723	0.921053	0.0170198	0.963679
ENSMUST00000020964	Fkbp1b	protein_coding	0.133206	0.729816	0.115363	0.864993
ENSMUST00000004560	Bid	protein_coding	-0.338296	0.210844	-0.432556	0.151083
ENSMUST00000004565	Ralb	protein_coding	0.222386	0.264141	0.212336	0.348315
ENSMUST00000160752	Gtf2h4	protein_coding	-0.610138	0.312846	-4.99792	0.0911422
ENSMUST00000022140	Ocln	protein_coding	-1.12942	1.03926e-09	-1.17103	0.00722461
ENSMUST00000124417	Irak1	protein_coding	-0.301111	0.710299	-0.648203	0.839651
ENSMUST00000156613	Zfp142	protein_coding	0.483189	0.258448	0.576531	0.378326
ENSMUST00000153222	Lrrc61	protein_coding	-0.593585	0.444506	-0.934001	0.513769
ENSMUST00000153224	Exosc8	protein_coding	-0.572204	0.240776	-0.640479	0.390713
ENSMUST00000156617	Tor2a	protein_coding	-0.675377	0.193127	-0.904263	0.394134
ENSMUST00000109496	Homer1	protein_coding	3.65699	1.10762e-12	6.86626	5.36051e-08
ENSMUST00000050709	Dok7	protein_coding	-0.352623	0.440893	-0.368109	0.505194
ENSMUST00000169942	Pdzrn4	protein_coding	-0.173163	0.652379	-0.172753	0.785191
ENSMUST00000109547	Nup93	protein_coding	-0.0644297	0.904595	-0.172387	0.814932
ENSMUST00000169948	Rchy1	protein_coding	-0.205985	0.300831	-0.220726	0.509441
ENSMUST00000058856	Scd4	protein_coding	0.125408	0.852657	0.236377	0.72841
ENSMUST00000151098	Col23a1	protein_coding	0.116707	0.915956	0.27337	0.933282
ENSMUST00000045473	Tmcc2	protein_coding	0.107684	0.566759	0.103691	0.679762
ENSMUST00000121564	Fam118b	protein_coding	0.333821	0.496706	0.466515	0.676719
ENSMUST00000212009	Ces5a	protein_coding	0.121259	0.912428	0.057283	0.985394
ENSMUST00000212005	Tecr	protein_coding	-0.214465	0.43876	-0.216578	0.554966
ENSMUST00000160758	Mycbp2	protein_coding	-0.151649	0.420239	-0.152024	0.558133
ENSMUST00000212000	Zfp821	protein_coding	-0.0479701	0.880514	-0.0399936	0.930973
ENSMUST00000212001	Mast3	protein_coding	0.282423	0.719046	0.57706	0.623441
ENSMUST00000109544	Vcan	protein_coding	0.511403	0.000403771	0.534169	0.00698763
ENSMUST00000042664	Slc16a2	protein_coding	0.259694	0.00632265	0.257154	0.0423327
ENSMUST00000127492	Map6	protein_coding	-0.274586	0.0233596	-0.277554	0.0869428
ENSMUST00000206038	Ctf2	protein_coding	-0.033294	0.954759	-0.0807334	0.916981
ENSMUST00000206039	Zfp710	protein_coding	-0.30419	0.493398	-0.398857	0.556979
ENSMUST00000113440	Ccdc88b	protein_coding	-0.178495	0.366913	-0.179158	0.541233
ENSMUST00000206034	Sox6	protein_coding	0.154512	0.525074	0.182846	0.515888
ENSMUST00000206030	Fxyd1	protein_coding	0.0776406	0.898032	0.0809597	0.929006
ENSMUST00000094870	Zfp787	protein_coding	0.0536613	0.830528	0.0499797	0.907314
ENSMUST00000022377	Txndc16	protein_coding	0.0206583	0.942744	0.0328556	0.944454
ENSMUST00000071937	Kcnj14	protein_coding	0.716205	0.000893199	0.785887	0.00042682
ENSMUST00000071935	Myo9b	protein_coding	-0.0207701	0.940034	-0.0306237	0.943822
ENSMUST00000019843	Akt3	protein_coding	0.184436	0.799325	0.110089	0.944766
ENSMUST00000131888	Trim41	protein_coding	1.31202	7.16491e-09	1.39175	9.4389e-08
ENSMUST00000163955	Glud1	protein_coding	0.278667	0.488319	0.198837	0.776266
ENSMUST00000076623	Arap2	protein_coding	0.227214	0.0444256	0.224752	0.0907009
ENSMUST00000170662	Sox21	protein_coding	0.388603	0.0689095	0.365427	0.125715
ENSMUST00000007131	Acly	protein_coding	0.0184883	0.983059	-0.24219	0.96132
ENSMUST00000087871	Gnas	protein_coding	0.451331	0.000396804	0.454717	0.000247874
ENSMUST00000087879	C77370	protein_coding	-0.261133	0.0931059	-0.28067	0.146452
ENSMUST00000132283	Trim2	protein_coding	-0.343852	0.401876	-0.388343	0.453691
ENSMUST00000132282	Zswim1	protein_coding	-0.440816	0.615716	-2.32293	0.53002
ENSMUST00000132280	Ace	protein_coding	-0.119851	0.873613	-0.0497516	0.970167
ENSMUST00000078374	U2surp	protein_coding	0.535852	6.32113e-05	0.547098	0.00255168
ENSMUST00000007139	Eif1b	protein_coding	-0.0222481	0.937102	-0.0302848	0.937935
ENSMUST00000208782	Zfand6	protein_coding	0.0488059	0.955748	0.0853963	0.982881
ENSMUST00000173483	Dtnb	protein_coding	0.393013	0.178524	0.445952	0.156786
ENSMUST00000042662	Mzt1	protein_coding	-0.180757	0.146091	-0.189941	0.181862
ENSMUST00000042790	Hspb2	protein_coding	0.41098	0.565179	0.569747	0.661106
ENSMUST00000209787	Primpol	protein_coding	0.402772	0.632114	0.804368	0.802785
ENSMUST00000042792	Scn7a	protein_coding	0.168876	0.758054	0.218811	0.773754
ENSMUST00000165460	Whamm	protein_coding	-0.52834	0.0227519	-0.572899	0.024758
ENSMUST00000136614	Shcbp1l	protein_coding	-0.0831506	0.893683	-0.0707475	0.927905
ENSMUST00000165469	Sorbs1	protein_coding	0.466579	0.28649	0.486771	0.446684
ENSMUST00000162602	Pard3	protein_coding	0.0388304	0.97055	-2.8177	0.543626
ENSMUST00000162600	Gulp1	protein_coding	0.524515	0.515227	2.93559	0.299324
ENSMUST00000162606	Pcmt1	protein_coding	-0.0531292	0.874657	-0.0582147	0.903043
ENSMUST00000031862	Cbx3	protein_coding	-0.24595	0.0389776	-0.248737	0.10489
ENSMUST00000029991	Ppp3r2	protein_coding	0.173132	0.850309	0.172151	0.921049
ENSMUST00000200069	Nras	protein_coding	-0.115746	0.915012	-0.391396	0.911958
ENSMUST00000031866	Mtpn	protein_coding	0.0648327	0.614071	0.0606889	0.786999
ENSMUST00000186049	Armc8	protein_coding	0.20029	0.594684	0.175426	0.837017
ENSMUST00000126100	Zbtb20	protein_coding	0.279343	0.666335	0.375675	0.653675
ENSMUST00000043227	Rcbtb1	protein_coding	-0.245505	0.0509982	-0.254011	0.111922
ENSMUST00000186045	Srrm2	protein_coding	0.241833	0.507805	0.247513	0.636199
ENSMUST00000161557	Nwd1	protein_coding	0.381131	0.414688	0.418811	0.706724
ENSMUST00000161553	Parp4	protein_coding	0.188019	0.522241	0.194497	0.537238
ENSMUST00000086058	Bscl2	protein_coding	0.0932244	0.699588	0.114529	0.818573
ENSMUST00000113099	Gapvd1	protein_coding	-0.243952	0.193662	-0.26464	0.194006
ENSMUST00000079961	Nup93	protein_coding	0.186217	0.517309	0.227293	0.510125
ENSMUST00000184574	Kcng2	protein_coding	-0.417263	0.492276	-0.599261	0.421514
ENSMUST00000086056	Piwil1	protein_coding	0.483699	0.495508	0.737241	0.557787
ENSMUST00000080853	Pecam1	protein_coding	0.582239	0.0152104	0.752934	0.0825448
ENSMUST00000092940	Spns3	protein_coding	-0.301326	0.751309	-1.46697	0.779419
ENSMUST00000035813	Ppp1r9a	protein_coding	-0.135937	0.209989	-0.140518	0.35219
ENSMUST00000113095	Morf4l2	protein_coding	1.45533	0.0184703	5.45517	0.0276776
ENSMUST00000125454	Timm17a	protein_coding	0.0294203	0.968347	-0.0501148	0.96153
ENSMUST00000108453	Zfp296	protein_coding	-0.290799	0.705027	-0.434524	0.700419
ENSMUST00000108450	Nectin2	protein_coding	0.978889	1.03902e-05	1.01023	6.87379e-07
ENSMUST00000186598	Plch2	protein_coding	-0.202796	0.679367	-0.194911	0.756023
ENSMUST00000123680	Pigyl	protein_coding	-0.296196	0.170563	-0.308036	0.156786
ENSMUST00000027846	Tada1	protein_coding	-0.367403	0.0070836	-0.375674	0.00459952
ENSMUST00000123682	Aasdh	protein_coding	-0.689664	0.0479795	-0.724803	0.0444115
ENSMUST00000186591	Nck1	protein_coding	-0.154117	0.76455	-0.204187	0.742396
ENSMUST00000176018	Cers6	protein_coding	-0.0238531	0.958132	-0.0405376	0.942799
ENSMUST00000026469	Nab2	protein_coding	1.75011	1.21257e-38	1.78104	8.01999e-32
ENSMUST00000089559	Ddrgk1	protein_coding	0.250557	0.0397784	0.248355	0.0893995
ENSMUST00000123876	St7l	protein_coding	-0.858991	0.213506	-1.67574	0.443185
ENSMUST00000026466	Tac2	protein_coding	-0.0857318	0.908185	-0.139764	0.873965
ENSMUST00000026461	Prim1	protein_coding	-0.186161	0.544062	-0.200133	0.580856
ENSMUST00000096753	Hnrnpul2	protein_coding	0.218268	0.0100695	0.21616	0.0835209
ENSMUST00000122156	Cspp1	protein_coding	0.106163	0.867831	0.0781686	0.944069
ENSMUST00000081702	Trabd	protein_coding	-0.877116	2.30921e-10	-0.913656	3.87943e-05
ENSMUST00000075491	Fkbp8	protein_coding	0.246545	0.150167	0.23825	0.294321
ENSMUST00000108985	Gm14306	protein_coding	-0.12442	0.736573	-0.14224	0.769247
ENSMUST00000108987	Sept8	protein_coding	0.232973	0.0423935	0.231177	0.354281
ENSMUST00000108981	Gm14305	protein_coding	-0.343883	0.126293	-0.386926	0.116258
ENSMUST00000108980	Gm14305	protein_coding	0.0136249	0.962057	0.0107335	0.982881
ENSMUST00000074653	8030462N17Rik	protein_coding	-0.327171	0.043794	-0.347046	0.0296649
ENSMUST00000134939	Qars	protein_coding	-0.0368505	0.903775	-0.0461311	0.946039
ENSMUST00000160609	Wbscr17	protein_coding	-0.373009	0.203323	-0.442383	0.251362
ENSMUST00000061143	Map7d1	protein_coding	0.754402	9.24586e-06	0.717199	0.000546896
ENSMUST00000027592	Ubxn4	protein_coding	0.143419	0.16935	0.139622	0.388071
ENSMUST00000164733	Tmem176b	protein_coding	-0.100752	0.920754	-0.481576	0.751493
ENSMUST00000176509	Zbtb25	protein_coding	-0.401736	0.379176	-0.393263	0.457643
ENSMUST00000175977	Cct8	protein_coding	0.322512	0.732881	-0.419075	0.960754
ENSMUST00000080857	Plec	protein_coding	-0.244754	0.638948	-6.29101	0.140046
ENSMUST00000030800	Fastk	protein_coding	0.0354029	0.898516	0.0322292	0.930561
ENSMUST00000030803	Uts2	protein_coding	-0.652687	0.338232	-0.862404	0.561835
ENSMUST00000030805	Park7	protein_coding	0.2242	0.190972	0.215358	0.289628
ENSMUST00000030806	Kif1b	protein_coding	1.49034	2.56386e-47	1.50281	1.49368e-41
ENSMUST00000106464	Ccdc163	protein_coding	-0.126349	0.911443	-1.17039	0.80641
ENSMUST00000106466	Rwdd3	protein_coding	-0.256276	0.202244	-0.23923	0.403363
ENSMUST00000106467	Rwdd3	protein_coding	-0.162257	0.862966	-0.364053	0.900937
ENSMUST00000040941	Erv3	protein_coding	0.248868	0.704623	0.328952	0.69665
ENSMUST00000057185	Pcdh1	protein_coding	0.900034	1.50375e-05	1.05679	0.00473312
ENSMUST00000126943	Numb	protein_coding	0.0512651	0.959384	0.0109893	0.99595
ENSMUST00000070713	Ints10	protein_coding	-0.417501	0.000311157	-0.419468	0.0091928
ENSMUST00000126811	Tceal7	protein_coding	-0.0741541	0.944352	-0.201159	0.923325
ENSMUST00000106822	Bcl2l15	protein_coding	-0.0126832	0.98405	0.0021123	0.998017
ENSMUST00000015358	Mtmr1	protein_coding	-0.0409945	0.831757	-0.0419339	0.880442
ENSMUST00000027337	Fam135a	protein_coding	0.0504815	0.846678	0.0323454	0.928039
ENSMUST00000008594	Nutf2	protein_coding	0.0464438	0.899165	0.0494894	0.930306
ENSMUST00000027338	Sdhaf4	protein_coding	-0.0402239	0.923433	-0.0527434	0.927533
ENSMUST00000027339	Smap1	protein_coding	-0.0169824	0.946924	-0.020635	0.949645
ENSMUST00000138133	Uck1	protein_coding	-1.18301	0.00707314	-1.48221	0.00096932
ENSMUST00000140843	Stard9	protein_coding	-0.0870425	0.879725	-0.270374	0.765747
ENSMUST00000176506	Meis3	protein_coding	-0.137992	0.820344	-0.0959312	0.932837
ENSMUST00000063788	Slc25a42	protein_coding	-0.509262	0.488701	-0.970342	0.539327
ENSMUST00000063782	Fam118b	protein_coding	-0.361352	0.288749	-0.397434	0.346598
ENSMUST00000066496	Nudcd3	protein_coding	0.087471	0.589158	0.0804997	0.701113
ENSMUST00000174779	Csnk2b	protein_coding	0.90225	0.199317	4.93645	0.0560313
ENSMUST00000071703	Zcchc6	protein_coding	0.703159	4.92037e-05	0.718712	0.00164597
ENSMUST00000059428	Ccdc149	protein_coding	-0.036244	0.878075	-0.0450789	0.880057
ENSMUST00000185767	Taf9	protein_coding	0.677244	0.0877965	0.752556	0.0942445
ENSMUST00000101118	Rybp	protein_coding	1.01572	8.77896e-41	1.01715	5.60789e-26
ENSMUST00000033575	Magee2	protein_coding	-1.20417	2.53297e-16	-1.22015	8.27852e-16
ENSMUST00000177232	Med23	protein_coding	-0.371436	0.115232	-0.394229	0.167156
ENSMUST00000177236	Rnf141	protein_coding	-0.0444086	0.770645	-0.0488245	0.848334
ENSMUST00000140596	Macf1	protein_coding	-0.0815671	0.816135	-0.0887516	0.832155
ENSMUST00000140594	Pqlc1	protein_coding	0.749147	0.00302935	0.796062	0.00195716
ENSMUST00000140592	Dpm2	protein_coding	-0.787871	0.00133086	-0.830404	0.000181984
ENSMUST00000021652	Acot4	protein_coding	-0.720584	0.00784311	-0.787794	0.00138886
ENSMUST00000049714	Synrg	protein_coding	-0.252661	0.287912	-0.219226	0.506175
ENSMUST00000021659	Fam161b	protein_coding	-0.886058	0.00114699	-1.00664	0.00103689
ENSMUST00000171699	Spats2l	protein_coding	-0.103446	0.919117	-0.468985	0.92825
ENSMUST00000093833	Fam219b	protein_coding	-0.522424	0.0197418	-0.576516	0.0404252
ENSMUST00000165924	Sp1	protein_coding	0.488921	0.544607	0.823819	0.81278
ENSMUST00000031477	Golga3	protein_coding	-0.245232	0.0412957	-0.251366	0.131348
ENSMUST00000171691	Mdga1	protein_coding	0.189346	0.0843653	0.184149	0.325839
ENSMUST00000171690	A830018L16Rik	protein_coding	-0.225634	0.354725	-0.257669	0.38754
ENSMUST00000165929	Asb14	protein_coding	-0.0297878	0.979546	-0.147827	0.955521
ENSMUST00000171696	Ttpal	protein_coding	1.16918	1.79433e-15	1.19614	1.7285e-11
ENSMUST00000173929	Abl2	protein_coding	-0.193186	0.663481	-0.236558	0.657976
ENSMUST00000173920	Egfl7	protein_coding	0.14408	0.841299	0.125031	0.910103
ENSMUST00000173924	Brsk2	protein_coding	-0.832635	0.137805	-1.27965	0.505608
ENSMUST00000135719	Ccnl1	protein_coding	1.9686	2.1165e-13	2.09125	2.87893e-06
ENSMUST00000135713	Phex	protein_coding	0.612721	0.112878	0.582267	0.136033
ENSMUST00000101615	Thoc5	protein_coding	-0.282786	0.683442	-0.364674	0.857501
ENSMUST00000001599	Klhl10	protein_coding	-0.29585	0.723621	-0.437496	0.771711
ENSMUST00000160366	Apopt1	protein_coding	-0.389154	0.671232	-1.02347	0.877746
ENSMUST00000053106	Amigo2	protein_coding	1.16112	1.25783e-10	1.19835	3.38226e-07
ENSMUST00000004868	Mtfp1	protein_coding	-0.261593	0.0522178	-0.271462	0.0342785
ENSMUST00000053109	Fbxo46	protein_coding	0.110465	0.661614	0.105665	0.750231
ENSMUST00000196506	Tm4sf1	protein_coding	0.497757	0.283003	0.626354	0.547048
ENSMUST00000131412	Armc9	protein_coding	-0.209501	0.370842	-0.240163	0.367776
ENSMUST00000186867	Pfkfb2	protein_coding	-0.805059	0.0314226	-0.955268	0.00999782
ENSMUST00000131415	Coro1a	protein_coding	0.658627	0.0596116	0.748345	0.0486155
ENSMUST00000020308	Ddit4	protein_coding	-0.215051	0.217931	-0.222487	0.275679
ENSMUST00000020309	Dnajb12	protein_coding	-0.0280846	0.94074	-0.0705274	0.926397
ENSMUST00000139660	Zmat3	protein_coding	0.546783	0.377692	0.707391	0.451411
ENSMUST00000101613	Ap1b1	protein_coding	-0.0602451	0.754395	-0.068402	0.792741
ENSMUST00000154426	Trp53bp1	protein_coding	-0.13103	0.813591	-0.117793	0.871104
ENSMUST00000154424	Reps2	protein_coding	0.00113308	0.995525	0.00468731	0.988576
ENSMUST00000154428	Unc45a	protein_coding	1.01388	0.00346135	1.29723	0.324299
ENSMUST00000056558	Zfp366	protein_coding	-0.111037	0.795737	-0.120508	0.806672
ENSMUST00000190837	Sytl2	protein_coding	-0.310112	0.657352	-0.650324	0.903712
ENSMUST00000149249	Mbtps2	protein_coding	-0.415556	0.430885	-0.453606	0.503752
ENSMUST00000149248	Spg7	protein_coding	-0.481559	0.325293	-0.627249	0.847667
ENSMUST00000058488	Tmed3	protein_coding	-0.233027	0.224075	-0.255606	0.187259
ENSMUST00000025379	Dpysl3	protein_coding	-0.0182457	0.964836	0.0336285	0.959033
ENSMUST00000115740	Foxp3	protein_coding	-0.641715	0.380544	-0.95938	0.754455
ENSMUST00000025375	Tcerg1	protein_coding	0.0632947	0.790668	0.0691444	0.832105
ENSMUST00000025377	Ppp2r2b	protein_coding	0.0915232	0.830288	0.0708097	0.928039
ENSMUST00000183330	Sipa1l3	protein_coding	-0.629559	0.103563	-0.62729	0.334053
ENSMUST00000183335	Nucb2	protein_coding	-0.853746	0.167088	-1.09789	0.402967
ENSMUST00000036928	Ephx1	protein_coding	0.104595	0.741991	0.0932931	0.835748
ENSMUST00000183338	Elf2	protein_coding	0.454085	0.443262	0.380833	0.73236
ENSMUST00000126334	Tm6sf1	protein_coding	-0.150652	0.868283	-0.218466	0.945406
ENSMUST00000115744	Usp27x	protein_coding	-0.0614547	0.834878	-0.0777511	0.827064
ENSMUST00000170271	Dlk2	protein_coding	0.5482	0.0933729	0.499296	0.197297
ENSMUST00000024979	Spag9	protein_coding	-0.00462965	0.995972	0.341371	0.898094
ENSMUST00000038563	Golim4	protein_coding	0.235036	0.244284	0.247411	0.275237
ENSMUST00000038562	Spsb1	protein_coding	1.06285	9.78546e-08	1.0606	0.000191599
ENSMUST00000109142	Hnrnph1	protein_coding	-0.0263025	0.960699	-0.0295853	0.977903
ENSMUST00000024976	Spsb3	protein_coding	-0.0297156	0.948339	-0.0768591	0.905151
ENSMUST00000100832	Recql	protein_coding	-0.327518	0.559475	-0.23708	0.919542
ENSMUST00000204202	Zfp638	protein_coding	-0.946313	0.135576	-1.26244	0.622134
ENSMUST00000022682	Sorbs3	protein_coding	0.423278	0.000125423	0.429615	0.00387474
ENSMUST00000133256	Dcaf11	protein_coding	-0.137566	0.84437	-0.146069	0.89257
ENSMUST00000145451	Zfp322a	protein_coding	-0.347889	0.709582	-1.80734	0.661106
ENSMUST00000021119	Aspa	protein_coding	0.507789	0.0571245	0.505708	0.048002
ENSMUST00000029507	Dram2	protein_coding	-0.0636713	0.904759	-0.0483937	0.962443
ENSMUST00000029502	Slc16a4	protein_coding	-0.488122	0.047796	-0.520212	0.048424
ENSMUST00000093245	Bean1	protein_coding	0.334923	0.394277	0.395171	0.426139
ENSMUST00000061925	Plcxd3	protein_coding	-0.195417	0.487703	-0.21895	0.478927
ENSMUST00000211128	Grtp1	protein_coding	0.413712	0.606374	0.569558	0.71322
ENSMUST00000211121	Snrnp70	protein_coding	0.31966	0.328365	0.256194	0.550435
ENSMUST00000211127	Lmtk3	protein_coding	0.0106598	0.988268	0.0026976	0.998017
ENSMUST00000187051	Apbb1	protein_coding	-0.142436	0.877897	-0.408453	0.800625
ENSMUST00000187057	Apbb1	protein_coding	2.56414	4.19205e-06	7.949	0.00386308
ENSMUST00000187058	Dnajb2	protein_coding	1.28629	0.000109206	1.37884	0.0477165
ENSMUST00000054955	Eml1	protein_coding	-0.0973177	0.788663	-0.141125	0.792178
ENSMUST00000020948	Abca8b	protein_coding	-0.0539901	0.871683	-0.0693755	0.897433
ENSMUST00000063347	Arf2	protein_coding	1.01112	0.0310451	1.04412	0.112213
ENSMUST00000031322	Cxcl15	protein_coding	0.0190443	0.961798	0.00742658	0.989876
ENSMUST00000207461	Gm45208	protein_coding	-0.38353	0.668302	-1.78675	0.717233
ENSMUST00000031320	Pf4	protein_coding	0.363565	0.625578	0.439299	0.771542
ENSMUST00000059997	A430105I19Rik	protein_coding	-0.207448	0.510323	-0.187279	0.69109
ENSMUST00000031327	Cxcl1	protein_coding	2.0868	0.000119422	3.92214	0.000111951
ENSMUST00000064257	Tchh	protein_coding	0.282136	0.40052	0.292192	0.371368
ENSMUST00000063344	Lmf1	protein_coding	-0.31696	0.687806	-0.078057	0.988658
ENSMUST00000118566	Tpm3	protein_coding	0.493416	0.0130934	0.506247	0.0706195
ENSMUST00000193023	Mpzl1	protein_coding	-0.120308	0.907853	-0.33182	0.855496
ENSMUST00000055390	Rhoj	protein_coding	0.75235	0.00387222	0.817193	0.000669065
ENSMUST00000155486	Ncor1	protein_coding	-0.322056	0.095113	-0.327765	0.0943613
ENSMUST00000161817	Rnf182	protein_coding	-0.187189	0.777584	-0.214694	0.830626
ENSMUST00000192998	Pomt1	protein_coding	-1.30574	0.0392297	-2.61087	0.3216
ENSMUST00000192995	1700102P08Rik	protein_coding	0.64358	0.21169	0.611735	0.414432
ENSMUST00000192991	Cep170	protein_coding	-0.208854	0.803018	-0.365771	0.818949
ENSMUST00000026854	Agbl1	protein_coding	0.0816368	0.933105	0.0407574	0.983243
ENSMUST00000177595	Fut8	protein_coding	-0.47951	0.417935	-0.751668	0.812456
ENSMUST00000022535	Dcp1a	protein_coding	-0.447742	0.0611147	-0.481815	0.160118
ENSMUST00000191104	Tns1	protein_coding	0.199655	0.345978	0.208302	0.49448
ENSMUST00000177592	Ddi2	protein_coding	2.04158	5.88451e-08	2.14116	0.324299
ENSMUST00000184863	Dexi	protein_coding	-0.211582	0.565027	-0.208615	0.599171
ENSMUST00000026858	Plk4	protein_coding	-0.403357	0.554721	-0.614888	0.847667
ENSMUST00000026859	Mfsd8	protein_coding	-0.356537	0.00582052	-0.363069	0.0218901
ENSMUST00000117179	Fgfr1	protein_coding	0.825967	2.6077e-08	0.835603	5.65087e-06
ENSMUST00000147024	A630010A05Rik	protein_coding	-0.382623	0.40092	-0.515427	0.33697
ENSMUST00000091672	Dusp22	protein_coding	-0.0679335	0.874918	-0.0679853	0.891472
ENSMUST00000096482	Skp2	protein_coding	-0.672732	0.0146339	-0.770066	0.0150701
ENSMUST00000112227	Gpm6b	protein_coding	-0.490874	0.459005	-0.844365	0.59053
ENSMUST00000112226	Gpm6b	protein_coding	-0.225215	0.76885	-0.459675	0.831573
ENSMUST00000112225	Trpv4	protein_coding	0.175132	0.855009	0.277745	0.946039
ENSMUST00000112224	Gpm6b	protein_coding	0.529004	1.65718e-14	0.529779	1.39564e-06
ENSMUST00000112223	Gpm6b	protein_coding	0.259081	0.00194071	0.255333	0.0615647
ENSMUST00000112221	Rad51ap1	protein_coding	-0.301382	0.592359	-0.357309	0.64876
ENSMUST00000112220	Rad51ap1	protein_coding	-0.380542	0.660455	-0.55208	0.841588
ENSMUST00000112229	Gpm6b	protein_coding	-0.998463	0.0512179	-1.52761	0.266187
ENSMUST00000030491	Cmpk1	protein_coding	0.489561	0.00231226	0.4908	0.0116768
ENSMUST00000030490	Stil	protein_coding	2.63185	9.50909e-09	2.90468	0.00434978
ENSMUST00000065124	Ginm1	protein_coding	0.114428	0.884328	0.0632726	0.965235
ENSMUST00000210650	Zscan18	protein_coding	-0.379493	0.0174491	-0.393171	0.214542
ENSMUST00000210655	Abcc8	protein_coding	-0.169813	0.576951	-0.141287	0.734213
ENSMUST00000210656	Ap3m2	protein_coding	-0.184202	0.11373	-0.190404	0.180507
ENSMUST00000210381	Gm4924	protein_coding	-0.861259	0.000238771	-0.910635	1.04372e-05
ENSMUST00000188142	Peak1	protein_coding	-0.1759	0.51345	-0.16996	0.70157
ENSMUST00000188145	Edem3	protein_coding	0.0839582	0.899359	0.133448	0.87427
ENSMUST00000091246	Flcn	protein_coding	-0.192091	0.335506	-0.204048	0.330054
ENSMUST00000024978	Nme3	protein_coding	0.0427906	0.905291	0.0361728	0.94121
ENSMUST00000024894	Cyp1b1	protein_coding	0.594325	0.0163775	0.658711	0.00530927
ENSMUST00000107471	Ttc23	protein_coding	0.197179	0.701186	0.124237	0.888936
ENSMUST00000037649	Rab3gap1	protein_coding	-0.0426107	0.803687	-0.0447156	0.864894
ENSMUST00000107473	Rara	protein_coding	1.85894	8.85838e-08	2.26769	1.54621e-06
ENSMUST00000064107	Tbc1d30	protein_coding	-0.820673	3.1137e-25	-0.829512	4.73381e-14
ENSMUST00000107475	Rara	protein_coding	1.42368	0.00605965	1.93795	0.14484
ENSMUST00000107478	Adamts17	protein_coding	-0.334203	0.324248	-0.341278	0.445988
ENSMUST00000107479	Rapgefl1	protein_coding	-0.647795	6.31079e-10	-0.661004	2.08038e-10
ENSMUST00000037646	Prdm4	protein_coding	-0.325307	0.0430015	-0.336572	0.0262374
ENSMUST00000037644	Cbl	protein_coding	0.0364409	0.97427	0.49492	0.899389
ENSMUST00000051672	Bst2	protein_coding	0.227987	0.667016	0.144672	0.839401
ENSMUST00000051671	Mkrn1	protein_coding	0.996558	0.110858	5.99076	0.0186992
ENSMUST00000030145	Dcaf12	protein_coding	0.096438	0.513473	0.094277	0.654795
ENSMUST00000030140	Ikbkap	protein_coding	0.0352224	0.852533	0.0326676	0.907676
ENSMUST00000030143	Ubap2	protein_coding	0.128537	0.754315	0.10395	0.941674
ENSMUST00000030142	Epb41l4b	protein_coding	1.16646	0.0255429	1.56968	0.0230018
ENSMUST00000150459	1500009L16Rik	protein_coding	-0.0469301	0.918549	-0.0737299	0.896366
ENSMUST00000054048	Mrgpre	protein_coding	-0.405417	0.0257497	-0.417334	0.0278295
ENSMUST00000152136	Iqck	protein_coding	0.592098	0.166988	0.763028	0.305391
ENSMUST00000152135	Ttpal	protein_coding	0.250274	0.686376	0.308323	0.640001
ENSMUST00000113575	Tmem198	protein_coding	2.0964	1.28034e-52	2.12666	1.96465e-38
ENSMUST00000202315	Sema6c	protein_coding	-0.388918	0.481855	-0.662666	0.66401
ENSMUST00000141857	N4bp2l2	protein_coding	0.116053	0.892137	0.0977543	0.947795
ENSMUST00000202313	Brca2	protein_coding	-0.444921	0.0587493	-0.449367	0.0622867
ENSMUST00000141852	Tada2a	protein_coding	-0.870706	0.0455614	-1.11501	0.0258251
ENSMUST00000060752	Mrps10	protein_coding	-0.142345	0.900342	3.98147	0.333855
ENSMUST00000144826	Noct	protein_coding	1.05734	1.41438e-08	1.08464	0.000123522
ENSMUST00000144825	Grip1	protein_coding	0.292652	0.756608	0.639876	0.85493
ENSMUST00000153427	Adam22	protein_coding	-0.195379	0.739279	-0.170293	0.841695
ENSMUST00000153424	Drp2	protein_coding	-0.0554629	0.675643	-0.0599564	0.813302
ENSMUST00000153425	Sfi1	protein_coding	-0.490748	0.2713	-0.667294	0.314259
ENSMUST00000153428	Phf12	protein_coding	-0.139456	0.800102	-0.176426	0.834399
ENSMUST00000120760	Dis3l	protein_coding	0.194875	0.803687	0.593291	0.591128
ENSMUST00000146088	Ttc38	protein_coding	-0.391114	0.0405607	-0.399671	0.0545932
ENSMUST00000052937	Asphd1	protein_coding	0.340277	0.66382	0.474561	0.891384
ENSMUST00000041317	Ammecr1	protein_coding	-0.303342	0.407422	-0.341081	0.351661
ENSMUST00000146085	Ccdc9	protein_coding	0.704793	0.0147195	0.78287	0.00327135
ENSMUST00000039758	Cox8a	protein_coding	0.438155	0.042203	0.428097	0.230736
ENSMUST00000057631	Sgsm2	protein_coding	0.203426	0.0554727	0.199983	0.180336
ENSMUST00000057632	Larp4	protein_coding	0.268356	0.565117	0.409941	0.612759
ENSMUST00000057634	Nrxn3	protein_coding	-0.0246866	0.959384	0.0107007	0.988658
ENSMUST00000106701	Scp2	protein_coding	0.212815	0.316201	0.205866	0.409134
ENSMUST00000106704	Rgs9	protein_coding	0.381582	0.307697	0.351623	0.406528
ENSMUST00000142505	Amy1	protein_coding	-0.103831	0.909963	-0.477276	0.684189
ENSMUST00000098825	AI429214	protein_coding	-0.681647	0.00454997	-0.732058	0.00340113
ENSMUST00000106709	Podn	protein_coding	-0.319985	0.729529	-2.20593	0.681441
ENSMUST00000106708	Podn	protein_coding	-0.125465	0.911284	-1.97874	0.756277
ENSMUST00000036031	Gsap	protein_coding	0.284777	0.117426	0.309663	0.216126
ENSMUST00000099452	Ctxn2	protein_coding	0.125845	0.747927	0.125762	0.791025
ENSMUST00000099457	Slc30a4	protein_coding	0.430554	0.607779	0.953484	0.673965
ENSMUST00000099454	AI606181	protein_coding	-0.460411	0.0329677	-0.460011	0.0480531
ENSMUST00000023133	Ppp1r1a	protein_coding	0.459155	0.000588912	0.454899	0.00157676
ENSMUST00000092486	Adamts14	protein_coding	-0.100931	0.856886	-0.0398113	0.962536
ENSMUST00000137296	Rnf31	protein_coding	-0.517646	0.158627	-0.557567	0.204455
ENSMUST00000127234	Gm16286	protein_coding	0.959393	0.0120405	1.07086	0.0476584
ENSMUST00000035100	Ttc21a	protein_coding	0.425222	0.582299	0.663424	0.688215
ENSMUST00000034783	Irak1bp1	protein_coding	-0.535083	0.20283	-0.689933	0.239306
ENSMUST00000047322	Rbbp8	protein_coding	0.907009	7.35208e-06	0.958825	8.95257e-06
ENSMUST00000047321	Arntl	protein_coding	-0.34944	0.0118687	-0.368028	0.0276218
ENSMUST00000109401	Tnpo1	protein_coding	-0.0476654	0.756608	-0.0571531	0.81066
ENSMUST00000035106	Slc25a38	protein_coding	-0.317992	0.0548016	-0.33017	0.0612189
ENSMUST00000047328	Igfbp2	protein_coding	0.44377	0.00401226	0.465457	0.000987284
ENSMUST00000088935	Zdhhc9	protein_coding	1.2206	0.0340567	1.97558	0.739005
ENSMUST00000154853	Aamdc	protein_coding	0.0566533	0.898231	0.0273608	0.96666
ENSMUST00000035105	Rpsa	protein_coding	0.673043	3.11737e-05	0.678919	0.00181827
ENSMUST00000013759	Fnbp4	protein_coding	0.174486	0.155552	0.168496	0.273863
ENSMUST00000056946	Neurl3	protein_coding	-0.0192349	0.959299	-0.0252926	0.960172
ENSMUST00000114249	Rbm11	protein_coding	-0.586175	0.455848	-3.28586	0.154636
ENSMUST00000182276	Dclre1a	protein_coding	-0.86203	0.000136824	-0.906648	0.000174966
ENSMUST00000200333	Sec24d	protein_coding	0.0453327	0.96501	-0.0559911	0.97903
ENSMUST00000110177	Ngb	protein_coding	-0.132664	0.899031	-0.19271	0.955521
ENSMUST00000206540	Cbl	protein_coding	0.392654	0.5976	0.375948	0.798683
ENSMUST00000180522	Gm4707	protein_coding	-0.359067	0.590457	-0.492475	0.641719
ENSMUST00000180521	1810049J17Rik	protein_coding	0.532337	0.112941	0.513932	0.196848
ENSMUST00000110179	Smox	protein_coding	0.0738854	0.923626	0.0722917	0.959033
ENSMUST00000037923	Rbm24	protein_coding	-1.27583	1.28753e-11	-1.3334	3.24943e-10
ENSMUST00000159367	Rps6kc1	protein_coding	0.41241	0.274095	0.439808	0.791337
ENSMUST00000159366	Phf21a	protein_coding	0.0173052	0.987251	-0.0538962	0.981395
ENSMUST00000017276	Cyth1	protein_coding	-0.622522	0.018019	-0.687994	0.0808954
ENSMUST00000159364	Fcor	protein_coding	0.213651	0.672778	0.227855	0.6912
ENSMUST00000147840	Rgs10	protein_coding	0.288192	0.615716	0.333672	0.682946
ENSMUST00000049312	Tmem55b	protein_coding	-0.0814226	0.690571	-0.0853667	0.754455
ENSMUST00000147842	Rcn2	protein_coding	-0.140178	0.895189	-0.465588	0.796808
ENSMUST00000055858	2410002F23Rik	protein_coding	-0.211415	0.185387	-0.219404	0.225612
ENSMUST00000098414	Svip	protein_coding	-0.168452	0.266733	-0.178288	0.265514
ENSMUST00000017188	Serpinb6a	protein_coding	0.476246	0.409945	1.27507	0.577456
ENSMUST00000111228	Tagln2	protein_coding	0.756452	0.161873	0.809487	0.4947
ENSMUST00000034648	Abcg4	protein_coding	-0.679523	8.07594e-05	-0.70968	0.000230594
ENSMUST00000111222	Ldlrad3	protein_coding	0.869425	0.0239616	0.524786	0.945406
ENSMUST00000090227	March6	protein_coding	0.218819	0.073985	0.21794	0.0860038
ENSMUST00000111220	Cadm3	protein_coding	-0.0027182	0.990035	-0.00648539	0.983602
ENSMUST00000111221	Wbscr27	protein_coding	1.97269	0.000665395	4.97621	0.179677
ENSMUST00000155811	Dnajc24	protein_coding	-0.238455	0.814464	-0.494066	0.820887
ENSMUST00000006452	Osgep	protein_coding	0.270159	0.573255	0.362566	0.729978
ENSMUST00000006451	Ttc5	protein_coding	-0.238023	0.0179661	-0.244444	0.0991053
ENSMUST00000169547	Slc43a2	protein_coding	-0.596674	0.00638796	-0.652746	0.0216537
ENSMUST00000161711	Opa3	protein_coding	1.11807	0.0368476	1.54354	0.0888281
ENSMUST00000161713	Dusp26	protein_coding	-0.327532	0.407623	-0.348474	0.643873
ENSMUST00000078615	BC051142	protein_coding	0.198277	0.76074	0.234041	0.771364
ENSMUST00000117687	Ppp2r2b	protein_coding	0.098943	0.662083	0.091057	0.755481
ENSMUST00000034785	Glce	protein_coding	0.933693	0.0026444	1.32154	0.00966106
ENSMUST00000095760	Lsmem1	protein_coding	-0.0518223	0.958418	-0.310852	0.853827
ENSMUST00000095762	Trdn	protein_coding	-0.389323	0.596481	-0.563829	0.565877
ENSMUST00000162335	Rnf146	protein_coding	-0.287668	0.0906956	-0.315288	0.11507
ENSMUST00000168631	Pkp4	protein_coding	-0.124775	0.901368	0.115357	0.989281
ENSMUST00000163626	Ovgp1	protein_coding	-0.0110109	0.990035	0.00240235	0.998212
ENSMUST00000163623	Nedd9	protein_coding	1.36023	4.91494e-16	1.394	3.16051e-14
ENSMUST00000114081	Mtcp1	protein_coding	-0.550515	0.377527	-0.693544	0.507748
ENSMUST00000114082	Sec16a	protein_coding	0.024119	0.908754	0.0125292	0.982623
ENSMUST00000114085	F8	protein_coding	0.368363	0.317751	0.484827	0.166091
ENSMUST00000114086	Klf7	protein_coding	0.67166	0.00865951	0.687065	0.130173
ENSMUST00000166298	Gnpda2	protein_coding	-0.0189558	0.986141	0.0881358	0.987777
ENSMUST00000110793	Rpap1	protein_coding	-0.130153	0.759766	-0.164874	0.786862
ENSMUST00000166294	Il1rap	protein_coding	-0.300775	0.0185555	-0.30612	0.187146
ENSMUST00000097945	Mier1	protein_coding	0.0582406	0.926041	0.464487	0.972722
ENSMUST00000201130	Ppef2	protein_coding	0.250597	0.652379	0.287067	0.606699
ENSMUST00000097949	Pde4b	protein_coding	-0.968468	3.72581e-07	-1.02134	1.41062e-06
ENSMUST00000201134	Nsg1	protein_coding	0.52907	0.484517	0.725799	0.596568
ENSMUST00000122312	Araf	protein_coding	-0.732688	0.000271371	-0.744978	0.00347964
ENSMUST00000160448	Zfpl1	protein_coding	0.173058	0.85734	0.201883	0.911945
ENSMUST00000114338	Add1	protein_coding	-0.0220613	0.93191	-0.031025	0.941674
ENSMUST00000022499	Rnaseh2b	protein_coding	0.0552998	0.921032	0.0645418	0.931123
ENSMUST00000160443	Nwd1	protein_coding	-0.108603	0.905968	-0.351345	0.864294
ENSMUST00000114337	Nif3l1	protein_coding	-0.487943	0.240818	-0.572811	0.167376
ENSMUST00000114336	Tprn	protein_coding	-0.180153	0.411083	-0.1925	0.465175
ENSMUST00000114335	Add1	protein_coding	0.439494	0.224383	0.508912	0.336808
ENSMUST00000085668	Gm5113	protein_coding	-0.437216	0.000908244	-0.454899	0.00157856
ENSMUST00000016631	Ppfibp1	protein_coding	-0.0694516	0.820344	-0.0936996	0.877186
ENSMUST00000178065	Gm4791	protein_coding	0.188029	0.728524	0.276697	0.620444
ENSMUST00000085661	Zfp655	protein_coding	1.0079	0.0803175	1.67858	0.161474
ENSMUST00000016638	Cd34	protein_coding	0.233964	0.444533	0.203858	0.615876
ENSMUST00000057325	Ccdc125	protein_coding	0.0811617	0.937593	-0.00357287	0.999235
ENSMUST00000162975	Rnf32	protein_coding	-0.241478	0.735274	-0.401752	0.679746
ENSMUST00000116247	Cracr2b	protein_coding	0.505199	0.441209	0.60484	0.528525
ENSMUST00000162973	Tle3	protein_coding	0.314566	0.729249	0.621014	0.92712
ENSMUST00000095544	Npw	protein_coding	0.456668	0.47574	0.750504	0.299789
ENSMUST00000023088	Naga	protein_coding	-0.0922712	0.698993	-0.0815026	0.818949
ENSMUST00000044003	Abca6	protein_coding	0.248618	0.453806	0.301308	0.405633
ENSMUST00000044000	4930447C04Rik	protein_coding	0.441692	0.467622	1.13921	0.337676
ENSMUST00000044007	Oxld1	protein_coding	-0.522118	0.122778	-0.579893	0.0427117
ENSMUST00000064759	Strip1	protein_coding	-0.116817	0.422392	-0.121148	0.492104
ENSMUST00000044009	Camk1d	protein_coding	-0.231981	0.134746	-0.238238	0.224191
ENSMUST00000160197	Exoc6b	protein_coding	-0.0295048	0.884481	-0.0273109	0.924838
ENSMUST00000131540	Nfrkb	protein_coding	-0.259115	0.756027	-0.45565	0.645351
ENSMUST00000008801	Cyp4f15	protein_coding	-0.011218	0.976226	-0.050021	0.909363
ENSMUST00000000145	Acsl6	protein_coding	0.250566	0.469401	0.23667	0.645324
ENSMUST00000164639	Htr7	protein_coding	-0.0305357	0.977673	-0.335285	0.943479
ENSMUST00000124250	Slc25a36	protein_coding	0.0765927	0.790867	0.0675331	0.843409
ENSMUST00000069705	Agbl5	protein_coding	-0.622465	0.108783	-0.721156	0.0604484
ENSMUST00000131547	Mpdz	protein_coding	-0.527091	0.407817	-0.727693	0.743813
ENSMUST00000069709	Aasdh	protein_coding	0.393696	0.664544	3.64157	0.241956
ENSMUST00000150941	Rab34	protein_coding	-0.639526	0.403731	-2.31219	0.598103
ENSMUST00000005532	Nid1	protein_coding	0.0438619	0.910927	0.06241	0.893889
ENSMUST00000152547	Cul1	protein_coding	-0.435534	0.467817	-0.656097	0.421514
ENSMUST00000041569	Ccdc113	protein_coding	-0.227427	0.738625	-0.317013	0.7311
ENSMUST00000021416	Mbip	protein_coding	-0.666493	0.000170669	-0.699942	9.12454e-05
ENSMUST00000021410	Ppp2r3c	protein_coding	-0.0993741	0.650082	-0.108046	0.669253
ENSMUST00000021412	Psma6	protein_coding	0.0603955	0.820148	0.0465637	0.911149
ENSMUST00000199125	Rilpl1	protein_coding	-0.332304	0.667893	-0.605503	0.715243
ENSMUST00000199124	Odf2l	protein_coding	-0.00503582	0.995319	-0.0117712	0.99415
ENSMUST00000078061	Ehmt2	protein_coding	0.939218	0.125291	2.61046	0.102384
ENSMUST00000041565	Ift172	protein_coding	0.183657	0.363225	0.185236	0.482997
ENSMUST00000168507	Kctd20	protein_coding	0.422778	0.460593	0.306783	0.833756
ENSMUST00000194066	Slc2a8	protein_coding	-0.459703	0.360764	-0.568497	0.382623
ENSMUST00000068250	Gm9958	protein_coding	-0.318793	0.555909	-0.411126	0.444173
ENSMUST00000194069	Mbnl1	protein_coding	0.548988	0.210613	1.12465	0.660767
ENSMUST00000166905	Dag1	protein_coding	0.870487	0.216347	3.62105	0.322938
ENSMUST00000168501	Phf8	protein_coding	0.248468	0.528413	0.238966	0.692354
ENSMUST00000088653	Ccdc87	protein_coding	-0.640117	0.121368	-0.778411	0.0517233
ENSMUST00000039011	Uchl4	protein_coding	0.0205323	0.983204	0.0587756	0.974339
ENSMUST00000039013	Abca3	protein_coding	0.117423	0.700471	0.0588434	0.927458
ENSMUST00000118793	Gm16181	protein_coding	-0.562237	0.379751	-0.774273	0.338929
ENSMUST00000039016	Lzts2	protein_coding	-0.370086	0.605662	-0.743371	0.812634
ENSMUST00000134402	Pak3	protein_coding	-0.100136	0.87667	-0.0620572	0.944243
ENSMUST00000109864	Fam110a	protein_coding	0.26443	0.769389	4.45029	0.206329
ENSMUST00000109867	Znrf3	protein_coding	-0.156114	0.427398	-0.158985	0.549053
ENSMUST00000109861	Slc52a3	protein_coding	0.110185	0.917518	-1.62494	0.832141
ENSMUST00000109860	Eml1	protein_coding	-0.48209	0.163909	-0.529626	0.324726
ENSMUST00000190247	Ptprn2	protein_coding	-0.0249311	0.935878	-0.0376966	0.928264
ENSMUST00000109869	Psmf1	protein_coding	-0.113672	0.622253	-0.126405	0.724342
ENSMUST00000109868	Idnk	protein_coding	0.320328	0.168229	0.338255	0.192709
ENSMUST00000120204	Adgrb2	protein_coding	0.175399	0.539723	0.164459	0.761549
ENSMUST00000046518	Itpk1	protein_coding	-0.0972151	0.61208	-0.103762	0.615876
ENSMUST00000120201	Zmym3	protein_coding	-0.201932	0.25509	-0.201341	0.581002
ENSMUST00000046513	Phyhipl	protein_coding	0.28865	0.029456	0.284431	0.0405585
ENSMUST00000046515	Nceh1	protein_coding	-0.528174	9.72177e-12	-0.533301	3.29374e-07
ENSMUST00000046514	Eprs	protein_coding	0.753501	3.52166e-06	0.762715	0.00044489
ENSMUST00000005394	Ufd1l	protein_coding	-0.166481	0.270625	-0.177668	0.259444
ENSMUST00000016498	Srms	protein_coding	0.284781	0.736282	0.30008	0.863771
ENSMUST00000005399	Zfp287	protein_coding	-1.0874	6.98248e-06	-1.19161	8.28049e-08
ENSMUST00000118919	Fam131a	protein_coding	-0.164954	0.167194	-0.169677	0.441889
ENSMUST00000002549	Abhd3	protein_coding	0.219099	0.559932	0.181808	0.825635
ENSMUST00000105700	Tardbp	protein_coding	-0.0870263	0.907838	-0.0124267	0.996334
ENSMUST00000105701	Masp2	protein_coding	0.125033	0.810084	0.189264	0.733344
ENSMUST00000105705	Fbxo44	protein_coding	0.179468	0.505814	0.192067	0.530304
ENSMUST00000105706	Fbxo6	protein_coding	0.0567877	0.95049	0.0966015	0.945169
ENSMUST00000105707	Mad2l2	protein_coding	-0.299439	0.718846	-0.625408	0.772831
ENSMUST00000038760	Lad1	protein_coding	0.251445	0.586703	0.227579	0.7071
ENSMUST00000132899	Pbx4	protein_coding	-0.0583311	0.960261	-1.08312	0.859864
ENSMUST00000038765	Inhbb	protein_coding	0.170544	0.594406	0.148945	0.716928
ENSMUST00000066791	Tmem179	protein_coding	-0.201922	0.278851	-0.213181	0.379881
ENSMUST00000103426	Ighm	IG_C_gene	0.231773	0.59181	0.289157	0.712763
ENSMUST00000020444	Llph	protein_coding	-0.0890874	0.685898	-0.0932875	0.739011
ENSMUST00000035222	Slc25a20	protein_coding	0.402104	0.0786273	0.424354	0.0882208
ENSMUST00000201908	Ociad2	protein_coding	0.0553245	0.941908	0.0266973	0.983996
ENSMUST00000035227	Nicn1	protein_coding	-0.116969	0.525836	-0.12485	0.552057
ENSMUST00000201902	Ccnd2	protein_coding	0.720033	0.0197952	0.859461	0.041379
ENSMUST00000113007	Rbm41	protein_coding	-0.383992	0.599777	-0.522381	0.881786
ENSMUST00000130671	Abcc1	protein_coding	0.119153	0.91501	-1.13885	0.871774
ENSMUST00000040532	Smim14	protein_coding	1.9311	5.40315e-24	2.03008	1.26514e-17
ENSMUST00000104942	AK157302	protein_coding	0.064426	0.952092	0.262318	0.85934
ENSMUST00000040531	Samd4b	protein_coding	0.574149	0.481611	2.07307	0.372909
ENSMUST00000080152	Gm10131	protein_coding	-0.162081	0.564217	-0.200344	0.773783
ENSMUST00000203212	Vopp1	protein_coding	-0.183322	0.846252	-0.346475	0.853203
ENSMUST00000034056	Tlr3	protein_coding	0.79931	0.0315383	0.921629	0.116722
ENSMUST00000102950	Osbp2	protein_coding	0.32127	0.678246	0.233879	0.955145
ENSMUST00000102951	Thnsl1	protein_coding	0.353127	0.698901	2.90456	0.42111
ENSMUST00000102952	Thnsl1	protein_coding	-0.70137	0.281088	-3.84989	0.364548
ENSMUST00000102953	Atp8b5	protein_coding	-0.106278	0.91877	0.160583	0.946039
ENSMUST00000102955	Cetn4	protein_coding	0.124639	0.870693	0.00079415	0.999528
ENSMUST00000102956	Slmap	protein_coding	-0.0402457	0.858357	-0.0359383	0.917571
ENSMUST00000102957	Ccl19	protein_coding	-0.062915	0.947701	0.0103112	0.996614
ENSMUST00000162109	Ppp4r1	protein_coding	0.0668438	0.95598	0.193834	0.978949
ENSMUST00000162108	Pgm2l1	protein_coding	-1.08534	0.0275	-1.56749	0.273743
ENSMUST00000162101	Auts2	protein_coding	0.023585	0.960815	0.0385755	0.952349
ENSMUST00000034051	Ufsp2	protein_coding	-0.0834067	0.766424	-0.115144	0.706723
ENSMUST00000029078	Car2	protein_coding	0.394286	0.000120188	0.391008	0.000340858
ENSMUST00000029076	Car3	protein_coding	-0.44739	0.537001	-0.524963	0.730178
ENSMUST00000029075	Dok5	protein_coding	0.30955	0.0760795	0.309874	0.0846744
ENSMUST00000029071	Car13	protein_coding	0.250963	0.791849	0.44218	0.792607
ENSMUST00000075670	Slbp	protein_coding	0.178037	0.379989	0.175648	0.611215
ENSMUST00000075671	Nfatc2ip	protein_coding	-0.465871	0.0264204	-0.489907	0.0103694
ENSMUST00000030684	Gnl2	protein_coding	0.608684	6.38263e-06	0.613503	2.80486e-05
ENSMUST00000033166	Mfsd13b	protein_coding	-0.507227	0.10689	-0.569764	0.0643419
ENSMUST00000099355	Tmpo	protein_coding	-0.00611536	0.990407	-0.109501	0.874423
ENSMUST00000009972	Ick	protein_coding	-0.492421	0.494251	-0.601245	0.68449
ENSMUST00000022330	Ldb3	protein_coding	0.356153	0.633794	0.423488	0.760727
ENSMUST00000148020	D630023F18Rik	protein_coding	-0.289378	0.470892	-0.312987	0.385386
ENSMUST00000148021	Rab11fip3	protein_coding	0.23142	0.78318	0.511816	0.693529
ENSMUST00000159608	Pde8b	protein_coding	-0.72705	0.234598	-1.13079	0.392784
ENSMUST00000149996	Lancl1	protein_coding	0.0631717	0.945501	-0.0624003	0.971607
ENSMUST00000152096	Map2k4	protein_coding	-0.285487	0.317749	-0.337821	0.18744
ENSMUST00000149992	Cnot7	protein_coding	0.500866	0.0185656	0.502338	0.0414261
ENSMUST00000056124	Fbrsl1	protein_coding	0.453162	0.123115	0.483846	0.238793
ENSMUST00000200744	Mpv17	protein_coding	-0.0421442	0.879384	-0.0374438	0.937606
ENSMUST00000112025	2310009B15Rik	protein_coding	0.273962	0.498748	0.203655	0.675899
ENSMUST00000112024	Chn1	protein_coding	0.249347	0.0929074	0.251974	0.143048
ENSMUST00000186659	Tubgcp4	protein_coding	-0.612687	0.183441	-0.900483	0.77229
ENSMUST00000112026	Lhx9	protein_coding	-0.555523	0.489912	-2.53	0.660985
ENSMUST00000112028	Erlin1	protein_coding	-0.987	1.86904e-05	-1.08049	0.111198
ENSMUST00000043074	Fau	protein_coding	0.210848	0.537612	0.191291	0.730178
ENSMUST00000161452	Ephx4	protein_coding	0.947008	0.134254	1.12879	0.419953
ENSMUST00000161450	Lmo3	protein_coding	-0.663639	0.141165	-0.855612	0.186088
ENSMUST00000151978	Kremen1	protein_coding	-0.0204933	0.979786	-0.0555773	0.955939
ENSMUST00000161455	Ctc1	protein_coding	0.206148	0.824481	1.9818	0.7369
ENSMUST00000161458	Zfp949	protein_coding	-0.286514	0.03058	-0.283792	0.0913735
ENSMUST00000161459	Setdb2	protein_coding	-0.795576	0.000165215	-0.814456	0.00015782
ENSMUST00000008088	Ttc9b	protein_coding	0.0833599	0.800736	0.064023	0.909231
ENSMUST00000176453	Taz	protein_coding	-0.26059	0.777162	-0.246415	0.952672
ENSMUST00000139848	Rasd2	protein_coding	-0.425832	0.00256202	-0.441865	0.00158339
ENSMUST00000188382	2410002F23Rik	protein_coding	0.681447	0.0450597	0.661977	0.141147
ENSMUST00000188381	R3hdm1	protein_coding	0.106441	0.89636	0.0886962	0.952287
ENSMUST00000139840	Pqlc2	protein_coding	-0.765394	1.19612e-05	-0.808082	5.35703e-05
ENSMUST00000044111	Rras	protein_coding	0.349862	0.132293	0.378587	0.0986139
ENSMUST00000107674	Gatb	protein_coding	0.255632	0.604711	0.191332	0.801976
ENSMUST00000107675	Fbxw7	protein_coding	1.12968	8.01121e-55	1.13313	1.97062e-30
ENSMUST00000107672	Gatb	protein_coding	-0.317411	0.702129	-0.398923	0.924838
ENSMUST00000112793	Cacna1c	protein_coding	-0.201792	0.716759	-0.167957	0.877746
ENSMUST00000107678	Fbxw7	protein_coding	0.544563	0.12684	0.56037	0.372533
ENSMUST00000107679	Fbxw7	protein_coding	0.390226	0.000940257	0.38644	0.0185731
ENSMUST00000133292	Wdr13	protein_coding	0.413741	0.000280568	0.404924	0.0476265
ENSMUST00000133297	Pi4kb	protein_coding	-0.105779	0.806819	-0.037985	0.960428
ENSMUST00000133298	Dlgap2	protein_coding	-0.0448213	0.762987	-0.0497618	0.853939
ENSMUST00000030303	Cyp2j6	protein_coding	0.228231	0.139145	0.220972	0.248628
ENSMUST00000074103	Pde4d	protein_coding	0.586131	0.46927	3.82783	0.132811
ENSMUST00000060427	Ier2	protein_coding	2.28398	1.09925e-05	3.11748	0.00374079
ENSMUST00000030306	Hook1	protein_coding	-0.352339	0.00158629	-0.364547	0.00129648
ENSMUST00000030305	Cyp2j13	protein_coding	-0.242905	0.614926	-0.299095	0.580457
ENSMUST00000030309	Eqtn	protein_coding	-0.0220792	0.985312	-0.126094	0.974571
ENSMUST00000044116	Spg20	protein_coding	-0.430989	0.000226768	-0.439848	0.0186217
ENSMUST00000132743	Tmcc3	protein_coding	-0.201156	0.838935	-0.329416	0.884286
ENSMUST00000128238	Shc1	protein_coding	0.07186	0.940337	-0.0779444	0.968579
ENSMUST00000113778	Eda	protein_coding	0.15357	0.789041	0.130083	0.921196
ENSMUST00000113779	Eda	protein_coding	-0.38268	0.46777	-0.462594	0.913311
ENSMUST00000145767	Fgf13	protein_coding	0.181463	0.854393	-0.0330116	0.989724
ENSMUST00000128231	Dad1	protein_coding	0.705575	0.000982579	0.750732	0.000106582
ENSMUST00000125640	Chka	protein_coding	0.649533	0.0971547	0.760978	0.0998013
ENSMUST00000125647	Echdc2	protein_coding	0.57847	0.4662	0.479335	0.938111
ENSMUST00000128234	Spg7	protein_coding	0.0284519	0.972195	0.0766694	0.9562
ENSMUST00000125645	Nrd1	protein_coding	0.938835	0.000601661	0.977411	0.00463617
ENSMUST00000128236	Fam213a	protein_coding	0.064612	0.94177	-0.0520239	0.969143
ENSMUST00000134744	Nsmf	protein_coding	-0.0738799	0.855804	-0.018128	0.983242
ENSMUST00000139593	Ndufb5	protein_coding	-0.279416	0.565481	-0.300386	0.648806
ENSMUST00000134748	2700049A03Rik	protein_coding	-0.770562	0.24974	-1.22175	0.290261
ENSMUST00000018087	Gdap1l1	protein_coding	0.0748306	0.746451	0.0713115	0.842918
ENSMUST00000190207	Tpp2	protein_coding	1.5125	1.43811e-13	1.60458	1.39667e-12
ENSMUST00000033025	Lcmt1	protein_coding	0.0243215	0.921662	0.015904	0.963114
ENSMUST00000052012	Phka1	protein_coding	0.362254	0.0120389	0.366944	0.0561882
ENSMUST00000020408	Mdm2	protein_coding	0.214172	0.0656097	0.209059	0.292275
ENSMUST00000050687	Jdp2	protein_coding	3.86505	4.20588e-49	4.27356	2.84523e-25
ENSMUST00000020400	Lrrtm1	protein_coding	-0.780778	0.00014525	-0.823741	0.000928158
ENSMUST00000020403	Csrp2	protein_coding	0.101408	0.751857	0.0891053	0.849188
ENSMUST00000042724	Usp38	protein_coding	2.08696	7.92284e-06	2.49741	0.00178899
ENSMUST00000156920	Ppp1r16a	protein_coding	-0.367679	0.642467	-0.436754	0.924614
ENSMUST00000156921	Rpl27a	protein_coding	0.966094	1.13009e-05	1.00205	0.00071505
ENSMUST00000156922	Trim32	protein_coding	0.183797	0.843004	0.768507	0.773783
ENSMUST00000050833	Ino80e	protein_coding	-0.0872652	0.935617	-0.130178	0.982881
ENSMUST00000059383	Fhl4	protein_coding	-0.942117	0.0219971	-1.09884	0.0300753
ENSMUST00000170846	Fam214a	protein_coding	-0.529846	2.0534e-06	-0.553354	0.00384546
ENSMUST00000170845	Adgrb1	protein_coding	0.864204	1.80735e-05	0.951382	0.00165835
ENSMUST00000037330	Inha	protein_coding	-0.184678	0.175308	-0.188411	0.356655
ENSMUST00000037337	Tbc1d19	protein_coding	0.149706	0.200887	0.14886	0.476437
ENSMUST00000183410	Zfp280d	protein_coding	-0.288291	0.720816	-0.884995	0.691681
ENSMUST00000170840	Parg	protein_coding	0.0913205	0.845108	0.173129	0.802785
ENSMUST00000101632	Osbp2	protein_coding	-0.249878	0.776708	-2.09759	0.753424
ENSMUST00000101637	Dtnb	protein_coding	0.224787	0.129381	0.220657	0.303772
ENSMUST00000172996	Smarca4	protein_coding	-0.409301	0.0151984	-0.444744	0.0351367
ENSMUST00000172992	Akap5	protein_coding	-0.835411	0.00882259	-0.882649	0.0375214
ENSMUST00000058383	Paip2b	protein_coding	-0.0272636	0.877468	-0.0348463	0.905151
ENSMUST00000179526	Tmem215	protein_coding	-0.661205	0.171907	-0.719813	0.248692
ENSMUST00000179525	1600014C10Rik	protein_coding	0.628851	0.403014	0.144053	0.983953
ENSMUST00000066283	Lif	protein_coding	1.28308	0.0435308	4.1903	0.0742243
ENSMUST00000066285	Hspa12a	protein_coding	-0.53424	1.3042e-09	-0.543577	6.60647e-08
ENSMUST00000100942	Vamp1	protein_coding	-0.400871	0.0401657	-0.429309	0.0661541
ENSMUST00000042581	6430571L13Rik	protein_coding	0.0891887	0.860402	0.0857836	0.895145
ENSMUST00000109491	Lbp	protein_coding	-0.554005	0.371087	-0.657409	0.512851
ENSMUST00000061483	Bmyc	protein_coding	-0.339169	0.00887608	-0.3568	0.0179235
ENSMUST00000130242	Ergic2	protein_coding	-0.281327	0.770006	-0.817515	0.800349
ENSMUST00000178136	Abcc3	protein_coding	-0.0389575	0.974168	-1.60383	0.836409
ENSMUST00000109493	Homer1	protein_coding	4.96467	1.64933e-33	6.27659	4.50984e-22
ENSMUST00000082319	Wdr33	protein_coding	0.531918	0.0106197	0.529576	0.00465197
ENSMUST00000167778	Gnb1l	protein_coding	-0.310332	0.700588	-4.12263	0.453691
ENSMUST00000188484	Ddx3y	protein_coding	1.20241	5.75112e-05	1.22134	0.0208416
ENSMUST00000021750	Ryr2	protein_coding	0.0357714	0.853648	0.0348073	0.897883
ENSMUST00000021757	Aoah	protein_coding	-0.186193	0.814969	-0.265709	0.828683
ENSMUST00000175734	Psd2	protein_coding	0.0759048	0.940307	3.56748	0.354738
ENSMUST00000123614	Ptgr2	protein_coding	0.205362	0.12068	0.209339	0.199952
ENSMUST00000032218	Lrrc23	protein_coding	0.311173	0.734677	1.28301	0.78411
ENSMUST00000066133	Apc	protein_coding	-0.00303846	0.996095	0.108041	0.918747
ENSMUST00000032217	Lag3	protein_coding	0.414223	0.065991	0.408642	0.100127
ENSMUST00000032216	Ptms	protein_coding	0.408004	0.00101605	0.406436	0.00306901
ENSMUST00000066134	Rpia	protein_coding	-0.597062	0.0266339	-0.654967	0.0353326
ENSMUST00000059650	Npsr1	protein_coding	0.317609	0.502635	0.292351	0.577456
ENSMUST00000000365	Mcts1	protein_coding	0.125835	0.580435	0.118449	0.676579
ENSMUST00000101094	Otub2	protein_coding	-0.164308	0.872395	-0.685167	0.736143
ENSMUST00000101095	Ctps2	protein_coding	0.529207	0.0621015	0.617139	0.0437981
ENSMUST00000072505	Acot5	protein_coding	-0.67694	0.301018	-0.949503	0.612057
ENSMUST00000072503	Rpl18	protein_coding	0.33633	0.0277958	0.329266	0.0646312
ENSMUST00000101099	Unc79	protein_coding	0.039542	0.863743	0.0391101	0.914112
ENSMUST00000094018	Plpp4	protein_coding	0.162436	0.642517	0.169264	0.662823
ENSMUST00000182763	Nktr	protein_coding	0.0589918	0.940157	-0.0260331	0.982645
ENSMUST00000162821	Exoc6b	protein_coding	-0.603522	0.26539	-0.957038	0.0988737
ENSMUST00000101587	Phf6	protein_coding	0.167678	0.715915	0.14153	0.799854
ENSMUST00000210871	Hmgb2	protein_coding	1.44297	0.00299992	1.76648	0.0451014
ENSMUST00000098252	Rab6a	protein_coding	1.00795	0.0060498	1.12865	0.110748
ENSMUST00000098250	Fchsd2	protein_coding	0.159254	0.494251	0.163445	0.573183
ENSMUST00000098257	Runx1t1	protein_coding	-0.959959	0.110449	-1.72776	0.401921
ENSMUST00000098256	Runx1t1	protein_coding	-0.861839	0.179837	-1.3415	0.675003
ENSMUST00000170507	Vsir	protein_coding	0.456394	0.576068	0.712298	0.822084
ENSMUST00000193792	Sec61a2	protein_coding	0.611319	6.38914e-07	0.618425	0.000235844
ENSMUST00000053718	Rlbp1	protein_coding	0.361068	0.202888	0.349061	0.323425
ENSMUST00000101581	Cacna2d1	protein_coding	-0.400514	0.0862128	-0.452878	0.151602
ENSMUST00000173713	Ube2i	protein_coding	0.0538642	0.958066	-0.0762358	0.976951
ENSMUST00000208718	Slc35a2	protein_coding	-0.0653597	0.953421	-0.415422	0.932218
ENSMUST00000060992	Rtn4	protein_coding	0.197876	0.220475	0.188551	0.354661
ENSMUST00000177005	Glmp	protein_coding	-0.0642399	0.795647	-0.0634755	0.874973
ENSMUST00000182491	Rxfp1	protein_coding	0.127507	0.90274	-0.0568007	0.984263
ENSMUST00000182490	Mzf1	protein_coding	-1.1133	3.40428e-07	-1.18076	1.21883e-06
ENSMUST00000025120	Elp2	protein_coding	-0.243144	0.00433166	-0.249418	0.0444115
ENSMUST00000131620	Sema6c	protein_coding	0.0695453	0.941309	0.434016	0.835931
ENSMUST00000055922	Lurap1l	protein_coding	0.348712	0.209074	0.33488	0.510207
ENSMUST00000139038	Abi1	protein_coding	0.735132	0.000288157	0.774495	0.000971218
ENSMUST00000055921	Npdc1	protein_coding	0.30435	0.141552	0.324019	0.186052
ENSMUST00000067426	Cdkn3	protein_coding	0.00617736	0.995244	-0.0273287	0.990887
ENSMUST00000067425	Zfp747	protein_coding	-0.720012	0.00063659	-0.757665	0.000141944
ENSMUST00000028062	Vim	protein_coding	0.373596	0.0350514	0.39475	0.0477752
ENSMUST00000135904	Chn1	protein_coding	0.216966	0.429996	0.216548	0.554318
ENSMUST00000135907	Lrp11	protein_coding	0.255278	0.735981	0.204412	0.877186
ENSMUST00000056290	Nf2	protein_coding	0.136268	0.469891	0.122756	0.672952
ENSMUST00000028069	4930426L09Rik	protein_coding	-0.0683167	0.946496	-0.183946	0.922479
ENSMUST00000154381	Glmp	protein_coding	-0.0958412	0.826994	-0.0937007	0.870207
ENSMUST00000154650	Bcas1	protein_coding	0.658377	0.00021626	0.70815	0.000860999
ENSMUST00000154652	Cdon	protein_coding	0.341644	0.367164	0.347903	0.495124
ENSMUST00000107394	Mesp2	protein_coding	-0.778892	0.0209375	-0.875354	0.00526887
ENSMUST00000107397	Nt5c3b	protein_coding	0.253588	0.802766	1.19096	0.724769
ENSMUST00000056749	Nhlrc3	protein_coding	-0.488877	0.0786413	-0.563417	0.0851977
ENSMUST00000178312	Gm21897	protein_coding	0.132443	0.659305	0.120558	0.83224
ENSMUST00000137500	Acaca	protein_coding	0.124271	0.87497	0.00851109	0.996133
ENSMUST00000155385	Cryz	protein_coding	0.268808	0.709237	0.22685	0.867076
ENSMUST00000144258	Pkn1	protein_coding	-0.0741443	0.837887	-0.0760609	0.883589
ENSMUST00000155387	Dgcr6	protein_coding	-0.275354	0.462206	-0.30601	0.475008
ENSMUST00000155381	Rab11fip4	protein_coding	-0.144747	0.782044	-0.230229	0.649019
ENSMUST00000144251	Phldb1	protein_coding	-0.0209057	0.95928	-0.0256145	0.978953
ENSMUST00000155389	Zbtb48	protein_coding	0.123032	0.910363	0.416906	0.892934
ENSMUST00000144254	Scn2a1	protein_coding	-0.137588	0.678621	-0.0986693	0.891915
ENSMUST00000160082	Mrpl30	protein_coding	0.220507	0.552672	0.217536	0.628319
ENSMUST00000189711	Cfap77	protein_coding	-0.0783197	0.925168	-0.00846047	0.995527
ENSMUST00000016033	Lta4h	protein_coding	0.000532408	0.997494	-0.00730083	0.983856
ENSMUST00000097281	Heatr5b	protein_coding	-0.35738	0.000190399	-0.362703	0.00276896
ENSMUST00000189718	Cd22	protein_coding	-0.544309	0.477883	-0.85676	0.526664
ENSMUST00000022428	Rnase4	protein_coding	0.48018	0.0190922	0.476685	0.0281369
ENSMUST00000192544	Fbxo28	protein_coding	0.455004	0.446817	0.755613	0.448737
ENSMUST00000204436	Krcc1	protein_coding	0.0798284	0.803333	0.0563568	0.918479
ENSMUST00000204433	Ldhb	protein_coding	-0.5866	0.0575555	-0.633658	0.102235
ENSMUST00000142363	Timm10b	protein_coding	0.146379	0.786042	0.146959	0.816112
ENSMUST00000201631	Tcf4	protein_coding	-0.783956	0.111193	-1.09237	0.566545
ENSMUST00000022470	Parg	protein_coding	-0.167232	0.249659	-0.174729	0.370175
ENSMUST00000022476	Glt8d1	protein_coding	0.0218188	0.959709	0.0527921	0.928039
ENSMUST00000037502	Fam117a	protein_coding	-0.818233	2.70382e-06	-0.85468	2.24437e-06
ENSMUST00000048223	Map2k2	protein_coding	0.886169	0.00160093	0.887502	0.0057414
ENSMUST00000048222	Zufsp	protein_coding	-0.24789	0.187081	-0.258076	0.254556
ENSMUST00000147781	Rptor	protein_coding	0.128471	0.757998	0.157176	0.81742
ENSMUST00000029336	Dhx36	protein_coding	-0.282023	0.0125698	-0.285318	0.016614
ENSMUST00000029331	P2ry1	protein_coding	-0.168617	0.719046	-0.207778	0.792741
ENSMUST00000064190	Rai1	protein_coding	0.489259	0.163318	0.671541	0.239688
ENSMUST00000141557	Trappc13	protein_coding	-0.201277	0.446859	-0.225669	0.468887
ENSMUST00000176878	Ugt3a1	protein_coding	-1.01757	0.0139124	-1.14084	0.00837659
ENSMUST00000176879	Arhgef2	protein_coding	-0.199488	0.806552	-0.547363	0.791817
ENSMUST00000141553	Dcun1d4	protein_coding	-0.42288	0.636344	-0.838593	0.710316
ENSMUST00000211087	Erc2	protein_coding	0.307039	0.681945	0.510188	0.757839
ENSMUST00000144781	Trmt10b	protein_coding	-0.494674	0.51741	-0.794242	0.671271
ENSMUST00000144788	Rab3il1	protein_coding	-0.432321	0.530936	-0.689756	0.545239
ENSMUST00000135373	6430573F11Rik	protein_coding	0.102306	0.868842	0.0511607	0.962522
ENSMUST00000119206	Rgma	protein_coding	0.119929	0.802308	0.149059	0.884225
ENSMUST00000040019	Sox10	protein_coding	0.504784	0.000300028	0.511119	0.000283471
ENSMUST00000049658	Pitpnm1	protein_coding	0.190954	0.111687	0.188983	0.183335
ENSMUST00000090591	Il3ra	protein_coding	0.24482	0.606484	0.287274	0.479965
ENSMUST00000040010	Rbm3	protein_coding	1.49745	8.12359e-10	1.53552	4.19894e-05
ENSMUST00000031170	Cenpc1	protein_coding	-0.251805	0.0344293	-0.262527	0.114265
ENSMUST00000040017	Mios	protein_coding	-0.657392	4.35369e-07	-0.670508	2.47996e-07
ENSMUST00000155520	Bcas2	protein_coding	0.0411774	0.921662	0.0234506	0.971973
ENSMUST00000055211	Lrrc3b	protein_coding	-1.50038	3.492e-07	-1.74305	1.28757e-07
ENSMUST00000155527	Cdh8	protein_coding	-0.0458782	0.938107	-0.0539102	0.957405
ENSMUST00000191939	Sox17	protein_coding	0.268276	0.644599	0.280403	0.743445
ENSMUST00000049575	Cltb	protein_coding	0.670728	5.61876e-13	0.670364	1.59623e-10
ENSMUST00000049572	Lipa	protein_coding	-0.205896	0.141947	-0.205508	0.304862
ENSMUST00000041769	Dync1li2	protein_coding	-0.0327999	0.800951	-0.0368301	0.88754
ENSMUST00000045229	Tmco3	protein_coding	0.0326159	0.863519	0.0284378	0.932805
ENSMUST00000034529	Cul5	protein_coding	-0.470153	0.0471714	-0.542424	0.0799319
ENSMUST00000041761	Prss23	protein_coding	0.0682093	0.897823	0.086507	0.90838
ENSMUST00000034522	Clmp	protein_coding	-0.259115	0.152439	-0.257522	0.221627
ENSMUST00000034521	Jhy	protein_coding	0.0584748	0.953773	0.0368674	0.983413
ENSMUST00000045224	Acer2	protein_coding	0.486391	0.0172937	0.502845	0.00993822
ENSMUST00000041767	Tbc1d2b	protein_coding	-0.29858	0.0211581	-0.30557	0.100556
ENSMUST00000034524	Rexo2	protein_coding	0.235058	0.0607141	0.231588	0.137878
ENSMUST00000147251	Celsr2	protein_coding	-0.257095	0.540772	-0.21297	0.787958
ENSMUST00000140206	Trmt2a	protein_coding	0.174879	0.667849	0.221395	0.611723
ENSMUST00000176824	Sik2	protein_coding	1.9902	3.9376e-14	2.09646	4.8043e-07
ENSMUST00000002198	Sf3a1	protein_coding	-0.624682	1.964e-06	-0.633075	4.81991e-06
ENSMUST00000205474	Hspbp1	protein_coding	0.0392119	0.973616	0.0967148	0.971763
ENSMUST00000146125	Sclt1	protein_coding	0.155021	0.796869	0.103814	0.946039
ENSMUST00000051822	Wdr61	protein_coding	0.303956	0.382784	0.319119	0.577456
ENSMUST00000049680	Zfp710	protein_coding	-0.80022	0.00149842	-0.848839	0.00394637
ENSMUST00000049681	Itgbl1	protein_coding	-0.00170331	0.996969	-0.0194862	0.982881
ENSMUST00000210024	Oplah	protein_coding	0.537058	0.38041	0.712333	0.341607
ENSMUST00000210025	Gm4924	protein_coding	0.277159	0.636064	0.425743	0.527392
ENSMUST00000113987	Kansl1l	protein_coding	0.254114	0.311465	0.239493	0.56827
ENSMUST00000111859	Rgl1	protein_coding	-0.345262	0.000539337	-0.350909	0.00604298
ENSMUST00000143573	Sec23b	protein_coding	-0.25588	0.528952	-0.245378	0.690653
ENSMUST00000111855	Wbp1l	protein_coding	0.1676	0.808601	2.25232	0.83659
ENSMUST00000111857	Rgl1	protein_coding	-0.332046	0.0256354	-0.347551	0.0280821
ENSMUST00000046751	Zmym6	protein_coding	-0.0872774	0.692331	-0.0936579	0.722795
ENSMUST00000046750	Tspan33	protein_coding	-0.453267	0.000167644	-0.469735	0.00405958
ENSMUST00000120040	Bola3	protein_coding	0.01062	0.991566	0.16827	0.944375
ENSMUST00000060705	Gm5084	protein_coding	-0.0149795	0.990143	-0.183218	0.941188
ENSMUST00000046755	Cobl	protein_coding	-0.650994	0.368496	-1.63093	0.724221
ENSMUST00000130139	Trim12c	protein_coding	0.153145	0.810756	0.165178	0.85009
ENSMUST00000095143	Rbm12b2	protein_coding	0.589852	0.456074	0.258002	0.977535
ENSMUST00000095144	Pdp1	protein_coding	0.1742	0.750476	0.321126	0.76335
ENSMUST00000095147	Dhtkd1	protein_coding	-0.0958303	0.754389	-0.121349	0.695291
ENSMUST00000155207	Morf4l2	protein_coding	-0.0121462	0.990407	-2.43116	0.813971
ENSMUST00000199450	Mef2c	protein_coding	0.263895	0.783864	2.83833	0.471617
ENSMUST00000004936	Ccl24	protein_coding	0.581712	0.119451	0.570672	0.143206
ENSMUST00000195136	Rnf149	protein_coding	0.276841	0.696436	0.137594	0.911149
ENSMUST00000177939	Fkbp5	protein_coding	0.0947047	0.907922	0.43436	0.971232
ENSMUST00000202291	N4bp2l1	protein_coding	-0.296035	0.68826	-0.411177	0.742962
ENSMUST00000202294	Ppm1g	protein_coding	-0.0188082	0.987485	2.89288	0.319609
ENSMUST00000155559	Fam20a	protein_coding	-0.06381	0.940824	-0.177975	0.90348
ENSMUST00000202298	Vkorc1l1	protein_coding	0.343223	0.684561	0.547121	0.801448
ENSMUST00000160699	Rnf214	protein_coding	-0.511294	0.000176914	-0.50975	0.0148968
ENSMUST00000117748	Ifnar1	protein_coding	0.993846	0.0227097	1.2898	0.670862
ENSMUST00000120594	Cadm2	protein_coding	0.521458	0.0128471	0.512029	0.296809
ENSMUST00000120595	Eml2	protein_coding	0.174123	0.473658	0.167582	0.640978
ENSMUST00000085840	Ttbk2	protein_coding	0.111583	0.828975	0.170989	0.875752
ENSMUST00000120591	Pisd	protein_coding	1.03667	0.000226768	1.41118	0.000569284
ENSMUST00000135887	Igfbp3	protein_coding	-0.266125	0.768049	-0.336697	0.82754
ENSMUST00000102569	0610010K14Rik	protein_coding	0.101661	0.929988	-0.999439	0.905425
ENSMUST00000046285	C1qa	protein_coding	0.549855	1.64336e-07	0.556843	1.58768e-05
ENSMUST00000046288	Ndufv3	protein_coding	-0.415523	0.00478461	-0.427424	0.00777002
ENSMUST00000097773	Klhl21	protein_coding	-0.939613	1.18846e-15	-0.961864	1.15467e-13
ENSMUST00000097774	Camta1	protein_coding	-0.201573	0.765979	-0.372756	0.759584
ENSMUST00000097776	Cnnm3	protein_coding	-0.936922	1.09547e-10	-0.966159	1.20286e-08
ENSMUST00000097778	Arid5a	protein_coding	4.2059	6.22154e-41	4.31668	2.03968e-13
ENSMUST00000150545	Pdrg1	protein_coding	0.411729	0.639844	3.17122	0.24018
ENSMUST00000101695	Tfe3	protein_coding	0.168048	0.857424	-1.06837	0.916353
ENSMUST00000041582	Snx25	protein_coding	1.38894	0.0188576	6.65961	0.00229357
ENSMUST00000160475	Opa1	protein_coding	0.593661	0.215296	0.88938	0.266949
ENSMUST00000202122	Clock	protein_coding	-0.158459	0.788215	-0.263154	0.819415
ENSMUST00000202123	G3bp2	protein_coding	-0.25345	0.574393	-0.267031	0.626214
ENSMUST00000114513	Gls	protein_coding	-0.00365537	0.98649	-0.00290588	0.992692
ENSMUST00000114512	Gls	protein_coding	1.18565	5.82332e-06	1.26445	0.00259746
ENSMUST00000114510	Gls	protein_coding	1.12692	2.17722e-08	1.16911	9.80546e-06
ENSMUST00000048766	Pex11b	protein_coding	-0.477111	0.10232	-0.557309	0.0862429
ENSMUST00000202129	Nsg1	protein_coding	0.182954	0.665907	0.107395	0.883359
ENSMUST00000114515	Bre	protein_coding	-0.164481	0.879471	-1.63156	0.817209
ENSMUST00000211861	Kif16b	protein_coding	-0.164155	0.863567	-0.67912	0.796262
ENSMUST00000211860	Ralyl	protein_coding	0.103818	0.816933	0.0896332	0.867508
ENSMUST00000211863	Hmgxb4	protein_coding	-0.529135	0.436356	-0.786025	0.567021
ENSMUST00000211862	Cpt1c	protein_coding	0.0428673	0.966136	-0.124403	0.962625
ENSMUST00000211866	Tmem231	protein_coding	-0.521726	0.379803	-0.995651	0.638
ENSMUST00000099646	Arl6	protein_coding	0.414204	0.0205327	0.394853	0.160123
ENSMUST00000203450	Syn2	protein_coding	-0.0457449	0.840235	-0.0475321	0.88807
ENSMUST00000088744	Adam22	protein_coding	-0.283877	0.428077	-0.366881	0.731217
ENSMUST00000203455	Zfp638	protein_coding	-0.671303	0.000851053	-0.719706	0.000650433
ENSMUST00000203459	Phf14	protein_coding	0.164781	0.773761	0.125271	0.879442
ENSMUST00000151636	Ablim2	protein_coding	-0.286356	0.720209	-0.332027	0.846782
ENSMUST00000167199	Mrpl16	protein_coding	-0.246051	0.0981603	-0.262446	0.170097
ENSMUST00000167196	Nle1	protein_coding	-0.453877	0.57411	-0.573029	0.836873
ENSMUST00000092694	Gm11559	protein_coding	0.74518	0.158631	0.894137	0.128408
ENSMUST00000090929	Rusc1	protein_coding	-0.2483	0.289019	-0.301437	0.332821
ENSMUST00000162342	Ap1s3	protein_coding	0.211261	0.432074	0.208352	0.515766
ENSMUST00000047488	Rap1gap2	protein_coding	-0.0665696	0.871041	-0.0535278	0.948465
ENSMUST00000162349	Apbb2	protein_coding	0.0972848	0.806364	0.093365	0.85574
ENSMUST00000047485	Rundc3b	protein_coding	-0.446481	2.48357e-06	-0.455729	0.000327567
ENSMUST00000090924	Trim46	protein_coding	-0.376911	0.0351221	-0.404114	0.111125
ENSMUST00000090927	Clk2	protein_coding	-0.480698	0.209031	-0.550034	0.35799
ENSMUST00000090697	Syt6	protein_coding	-0.067687	0.936732	-0.204996	0.942615
ENSMUST00000047157	Setd1a	protein_coding	0.295148	0.0670732	0.302341	0.0906538
ENSMUST00000019439	Tmem129	protein_coding	-0.594558	3.04065e-05	-0.61736	1.84138e-05
ENSMUST00000006397	Epor	protein_coding	-1.73121	1.10008e-12	-1.83108	3.97388e-13
ENSMUST00000002837	Tmed5	protein_coding	0.366761	0.00400807	0.362603	0.00598563
ENSMUST00000006391	Serpinb9	protein_coding	0.0511019	0.910003	0.0126733	0.986402
ENSMUST00000091348	Ehmt1	protein_coding	-0.640062	0.408946	-2.20967	0.475965
ENSMUST00000203982	H2afj	protein_coding	0.852384	0.000832462	0.854099	0.0022864
ENSMUST00000178925	Casp8ap2	protein_coding	-1.2729	7.669e-08	-1.37971	8.1531e-06
ENSMUST00000203988	Atf7ip	protein_coding	-0.209036	0.821777	-0.388918	0.812028
ENSMUST00000042509	Ppip5k2	protein_coding	0.285433	0.732881	0.880308	0.930707
ENSMUST00000159448	Actr1b	protein_coding	0.578678	0.146829	0.616951	0.287124
ENSMUST00000159440	Gls2	protein_coding	0.314897	0.295436	0.368493	0.446684
ENSMUST00000042503	Usp6nl	protein_coding	0.103239	0.806457	0.0575971	0.950522
ENSMUST00000159446	Kcnip2	protein_coding	-0.736815	0.00929713	-0.787079	0.0123005
ENSMUST00000159447	Ubn2	protein_coding	-0.987524	0.047469	-1.04195	0.597343
ENSMUST00000042506	Sgsm3	protein_coding	-0.299974	0.424005	-0.213408	0.880442
ENSMUST00000167446	Fancb	protein_coding	-0.494294	0.243385	-0.623682	0.123542
ENSMUST00000109492	Homer1	protein_coding	5.45188	1.26156e-41	6.88146	2.7208e-29
ENSMUST00000081265	Ebf1	protein_coding	0.0495236	0.932346	0.0852316	0.899072
ENSMUST00000127061	Polg2	protein_coding	0.0227863	0.977673	-0.0752996	0.969733
ENSMUST00000212511	Map1s	protein_coding	0.265038	0.74243	0.237547	0.851724
ENSMUST00000167449	Nisch	protein_coding	-0.369965	0.602982	-0.366804	0.779675
ENSMUST00000167448	Arel1	protein_coding	-0.261358	0.663658	-0.37449	0.533389
ENSMUST00000081260	Grip1	protein_coding	-0.200606	0.802734	-0.0436209	0.983602
ENSMUST00000160871	Rb1cc1	protein_coding	-0.33838	0.585806	-0.473966	0.684079
ENSMUST00000160870	Apbb2	protein_coding	-0.225653	0.390209	-0.201978	0.592002
ENSMUST00000006646	Nsmf	protein_coding	-0.0667779	0.853814	-0.0847308	0.908219
ENSMUST00000164189	Oplah	protein_coding	0.0456539	0.945301	0.234331	0.802785
ENSMUST00000164186	Nol4	protein_coding	-0.110277	0.845755	-0.210982	0.850511
ENSMUST00000123760	Borcs8	protein_coding	-0.418461	0.0526526	-0.45224	0.0289733
ENSMUST00000043675	Atp5l	protein_coding	0.4154	0.0325446	0.411458	0.139255
ENSMUST00000164181	Myl6	protein_coding	0.758458	5.38785e-06	0.763964	0.000739006
ENSMUST00000043676	Sspo	protein_coding	-0.161822	0.868049	-0.0882187	0.988194
ENSMUST00000117725	Foxred2	protein_coding	0.462242	0.449859	1.1143	0.83569
ENSMUST00000052904	Ccdc169	protein_coding	0.0709896	0.940413	-0.0710686	0.960704
ENSMUST00000117726	Abhd3	protein_coding	0.592676	0.422053	0.785096	0.710316
ENSMUST00000159194	Hddc2	protein_coding	-0.329475	0.705704	-0.702245	0.618473
ENSMUST00000159196	Wnk2	protein_coding	-0.131425	0.596468	-0.126944	0.646476
ENSMUST00000093270	Commd1	protein_coding	-0.0349177	0.954456	-0.0452266	0.95762
ENSMUST00000093271	Adgrg1	protein_coding	0.338962	0.00618586	0.344841	0.00819859
ENSMUST00000111072	Adam28	protein_coding	0.192686	0.70707	0.203132	0.72639
ENSMUST00000166312	Luc7l3	protein_coding	-0.323433	0.0686837	-0.341416	0.111904
ENSMUST00000209378	Rnh1	protein_coding	-0.273674	0.783324	-0.959797	0.770867
ENSMUST00000018743	Mief2	protein_coding	-0.932	9.10452e-08	-0.95658	1.40123e-09
ENSMUST00000018744	Shmt1	protein_coding	-0.0745806	0.789691	-0.0595831	0.899301
ENSMUST00000018748	Tbx3	protein_coding	-0.15397	0.86347	-0.376692	0.920143
ENSMUST00000174128	Abcf1	protein_coding	0.0231397	0.977188	0.164931	0.914052
ENSMUST00000003876	Brd8	protein_coding	-0.619942	0.000242013	-0.624131	0.00145892
ENSMUST00000168408	Rad1	protein_coding	-0.651921	0.327753	-1.02166	0.796865
ENSMUST00000003870	Mxi1	protein_coding	0.689436	6.74336e-05	0.706552	0.000102359
ENSMUST00000174120	Trak2	protein_coding	0.212971	0.567142	0.118314	0.856216
ENSMUST00000021324	Map3k14	protein_coding	1.51324	7.6325e-06	1.60931	0.00851202
ENSMUST00000174126	Mtx1	protein_coding	-0.0752937	0.876502	-0.228055	0.734998
ENSMUST00000168401	Lpl	protein_coding	-0.51007	0.165499	-0.663531	0.473147
ENSMUST00000134506	Paqr7	protein_coding	0.663655	0.0431695	0.711973	0.0887493
ENSMUST00000134507	Atrx	protein_coding	-0.042676	0.92985	-0.0663491	0.922495
ENSMUST00000134503	Ggt1	protein_coding	0.484881	0.460089	0.700397	0.788084
ENSMUST00000074834	Plec	protein_coding	0.217876	0.831768	0.596209	0.869367
ENSMUST00000205806	Kif22	protein_coding	-0.349867	0.697946	-0.656161	0.778888
ENSMUST00000205807	Fxyd1	protein_coding	0.497147	0.457716	0.594664	0.526617
ENSMUST00000205803	Fbrs	protein_coding	1.23463	0.00249192	1.61283	0.0127256
ENSMUST00000205800	Gpi1	protein_coding	0.164579	0.384934	0.173441	0.746865
ENSMUST00000118707	Dixdc1	protein_coding	-0.181264	0.832807	-0.233974	0.873916
ENSMUST00000187317	Cacna1c	protein_coding	0.316894	0.727839	1.71914	0.764432
ENSMUST00000157065	Slc1a3	protein_coding	0.671264	0.248068	0.584322	0.47108
ENSMUST00000020643	Rufy1	protein_coding	-0.415306	8.23207e-06	-0.423773	0.00162451
ENSMUST00000198199	Mef2c	protein_coding	-1.25938	0.000520718	-1.54435	0.0196376
ENSMUST00000075995	Cand2	protein_coding	0.164283	0.468544	0.170277	0.579335
ENSMUST00000075994	Pdzrn3	protein_coding	-0.26085	0.332204	-0.290689	0.262149
ENSMUST00000125339	Fam129c	protein_coding	0.182928	0.83073	0.50028	0.644071
ENSMUST00000075992	Pkib	protein_coding	-0.601281	0.0095219	-0.622854	0.01787
ENSMUST00000055966	Gabra3	protein_coding	-0.24323	0.120934	-0.267693	0.12927
ENSMUST00000027144	Cps1	protein_coding	0.133266	0.899519	0.209763	0.92825
ENSMUST00000027146	Ikzf2	protein_coding	-0.0642026	0.863921	-0.0722068	0.871877
ENSMUST00000027149	Lancl1	protein_coding	0.157063	0.815768	0.128107	0.922424
ENSMUST00000087315	Vars	protein_coding	-0.118838	0.343161	-0.122006	0.602029
ENSMUST00000082026	Dennd4c	protein_coding	-0.179743	0.139918	-0.183785	0.329501
ENSMUST00000082024	Mpp5	protein_coding	-0.0674799	0.738711	-0.073997	0.750774
ENSMUST00000089906	Zfp951	protein_coding	-0.86774	0.189031	-1.49682	0.513536
ENSMUST00000049130	Bex2	protein_coding	0.26385	0.120691	0.260819	0.236915
ENSMUST00000179721	Phlpp2	protein_coding	-0.437691	0.000291894	-0.449544	0.000130214
ENSMUST00000004097	Cux1	protein_coding	0.223209	0.191804	0.226176	0.263901
ENSMUST00000080771	Zbtb24	protein_coding	-0.500108	0.00107522	-0.519613	0.00178001
ENSMUST00000198445	Crb1	protein_coding	0.293341	0.691732	0.533972	0.507124
ENSMUST00000210523	Samd1	protein_coding	-0.311597	0.158437	-0.317909	0.130564
ENSMUST00000198440	Pmvk	protein_coding	1.21521	0.0395439	1.66308	0.355031
ENSMUST00000146482	Eef2k	protein_coding	-0.570537	0.479846	-1.08943	0.658627
ENSMUST00000033325	Swap70	protein_coding	0.138782	0.37464	0.133514	0.624566
ENSMUST00000033326	Wee1	protein_coding	-1.22364	1.71736e-15	-1.26924	2.21047e-17
ENSMUST00000112400	Adgrg2	protein_coding	-0.0398441	0.961853	-0.219999	0.98579
ENSMUST00000172607	Calu	protein_coding	0.204362	0.833269	0.450425	0.809877
ENSMUST00000172602	Fam161a	protein_coding	-0.232941	0.813109	-1.79779	0.749442
ENSMUST00000175656	Naaa	protein_coding	0.246282	0.759766	1.77671	0.834517
ENSMUST00000121052	Pomgnt1	protein_coding	-0.573494	0.429608	-0.239366	0.973719
ENSMUST00000045140	Tcaf1	protein_coding	0.79546	0.000355172	0.812884	0.0185909
ENSMUST00000021592	Cdca7l	protein_coding	-0.683112	0.0830567	-0.741788	0.0702438
ENSMUST00000021595	Psmc1	protein_coding	0.132935	0.382116	0.12479	0.45164
ENSMUST00000021596	Nrde2	protein_coding	-1.16567	8.54664e-25	-1.1799	7.79534e-18
ENSMUST00000009344	Xpo6	protein_coding	0.362089	0.0371966	0.386623	0.465175
ENSMUST00000179893	Ryr1	protein_coding	0.121801	0.76891	0.121832	0.888857
ENSMUST00000179891	Trappc13	protein_coding	-0.151688	0.791982	-5.77387	0.209856
ENSMUST00000019734	Cyb561	protein_coding	-0.259511	0.223143	-0.283946	0.230718
ENSMUST00000147928	Zrsr2	protein_coding	0.950782	1.59594e-05	1.00643	6.08609e-05
ENSMUST00000194740	Rab3gap2	protein_coding	0.134892	0.429608	0.130005	0.528918
ENSMUST00000120904	Hecw2	protein_coding	-0.523222	0.391871	-0.608806	0.891949
ENSMUST00000194746	Rpl31	protein_coding	0.510852	0.0302136	0.504701	0.165918
ENSMUST00000120902	Depdc5	protein_coding	-0.131883	0.778589	-0.21033	0.790669
ENSMUST00000154184	Shisa5	protein_coding	-0.0182791	0.962385	-0.0213089	0.972583
ENSMUST00000025163	Pfdn6	protein_coding	0.220035	0.245422	0.213112	0.271721
ENSMUST00000001116	Luzp1	protein_coding	0.0409262	0.914297	-0.00405997	0.996042
ENSMUST00000164408	Gm3591	protein_coding	-0.511718	0.0085744	-0.532364	0.00285146
ENSMUST00000001112	Grk4	protein_coding	0.170281	0.709632	0.185574	0.737827
ENSMUST00000164404	Vars2	protein_coding	-0.165906	0.83488	-0.000691276	0.999767
ENSMUST00000081828	Bbof1	protein_coding	-0.417283	0.102348	-0.446037	0.0561342
ENSMUST00000143010	Gpld1	protein_coding	-0.359224	0.695974	-2.38683	0.716072
ENSMUST00000084852	Numa1	protein_coding	-0.291478	0.063356	-0.303347	0.0914982
ENSMUST00000199710	Gm43064	protein_coding	-0.297985	0.527863	-0.403292	0.586648
ENSMUST00000069579	Tceb2	protein_coding	0.372473	0.0285531	0.368821	0.0790949
ENSMUST00000173554	Rxrb	protein_coding	0.162779	0.845345	0.00401382	0.997912
ENSMUST00000173550	Bag6	protein_coding	0.425786	0.000118355	0.415098	0.0120641
ENSMUST00000210785	Unc5d	protein_coding	-0.0185456	0.98733	-0.176569	0.97832
ENSMUST00000087600	Gda	protein_coding	-0.577293	1.69138e-05	-0.591033	0.000182229
ENSMUST00000003922	Syce2	protein_coding	0.20802	0.774768	0.310412	0.709104
ENSMUST00000072079	Rrs1	protein_coding	-0.151813	0.49571	-0.155072	0.531515
ENSMUST00000039608	Dym	protein_coding	-0.0455298	0.861173	-0.0511285	0.868756
ENSMUST00000160322	Sgtb	protein_coding	-0.349004	0.696795	-0.696686	0.713001
ENSMUST00000039601	Snrnp25	protein_coding	0.180257	0.631248	0.162297	0.770006
ENSMUST00000101551	Adam17	protein_coding	-0.0345024	0.963388	-0.115211	0.945662
ENSMUST00000147630	Zfp97	protein_coding	-0.908169	0.000102233	-0.971103	0.000127833
ENSMUST00000038973	Gnptg	protein_coding	0.204143	0.0568118	0.204954	0.188094
ENSMUST00000112522	Mbtps2	protein_coding	-0.910825	0.0773596	-0.707598	0.549512
ENSMUST00000131024	Ifi35	protein_coding	0.228214	0.783591	0.29776	0.831504
ENSMUST00000032585	Pop4	protein_coding	0.265212	0.0833333	0.271205	0.146539
ENSMUST00000131028	Aire	protein_coding	0.0177382	0.977673	0.02505	0.97783
ENSMUST00000130999	Eml1	protein_coding	-0.051153	0.953004	0.0263788	0.988194
ENSMUST00000130998	Gad1	protein_coding	1.76755	1.40932e-05	1.93575	0.0146645
ENSMUST00000130995	Tor1aip1	protein_coding	0.00957862	0.992456	0.0232269	0.990898
ENSMUST00000130994	Wdr77	protein_coding	-0.292522	0.220384	-0.274309	0.298737
ENSMUST00000130997	Zfp60	protein_coding	-1.02799	0.0790739	-1.48955	0.117145
ENSMUST00000176543	Fbxw17	protein_coding	-0.925329	0.121375	-1.34054	0.170145
ENSMUST00000130990	Mycn	protein_coding	-0.0622253	0.957852	2.96502	0.549642
ENSMUST00000130992	Atp6v1g2	protein_coding	-0.179507	0.792617	-0.140326	0.905883
ENSMUST00000023237	Naprt	protein_coding	0.218554	0.36926	0.212451	0.442485
ENSMUST00000001806	Coasy	protein_coding	-0.0964837	0.667124	-0.0710756	0.887492
ENSMUST00000001801	Tcirg1	protein_coding	0.203032	0.34373	0.177253	0.644008
ENSMUST00000001802	Naglu	protein_coding	-0.548426	0.00230431	-0.554969	0.00985216
ENSMUST00000163272	Suz12	protein_coding	0.651999	0.0822421	0.850328	0.146229
ENSMUST00000035053	Nme6	protein_coding	-0.483603	0.266949	-0.578662	0.329683
ENSMUST00000035055	Map4	protein_coding	0.481751	0.0183601	0.48528	0.0812683
ENSMUST00000035058	Cspg5	protein_coding	0.267496	0.275945	0.268768	0.443979
ENSMUST00000148238	Mto1	protein_coding	-0.183933	0.808437	-4.08751	0.401971
ENSMUST00000128869	Mapk10	protein_coding	0.272131	0.459394	0.243992	0.650518
ENSMUST00000076316	Arhgap10	protein_coding	-0.062546	0.820344	-0.0773973	0.864294
ENSMUST00000128860	Cdh8	protein_coding	-0.811037	3.35592e-08	-0.833438	2.04271e-08
ENSMUST00000128861	Pogk	protein_coding	0.325436	0.211804	0.304827	0.377293
ENSMUST00000128862	Nr3c2	protein_coding	-0.493195	0.514153	-0.808274	0.550259
ENSMUST00000082254	Jakmip2	protein_coding	-0.132378	0.156959	-0.137153	0.43352
ENSMUST00000028880	Slc20a1	protein_coding	0.360912	0.000827548	0.359255	0.00320195
ENSMUST00000028883	Pdyn	protein_coding	0.262558	0.36823	0.252889	0.623621
ENSMUST00000028882	Il1a	protein_coding	1.24862	0.00857784	1.43427	0.00351538
ENSMUST00000107303	Mlx	protein_coding	0.0280849	0.977938	-0.239967	0.952877
ENSMUST00000187485	Adgrb1	protein_coding	0.607309	8.32926e-09	0.611299	7.7545e-08
ENSMUST00000137079	Ccdc167	protein_coding	-0.283033	0.748332	-0.391439	0.835116
ENSMUST00000187486	Dst	protein_coding	0.377217	0.593125	0.513238	0.900497
ENSMUST00000152410	Mettl10	protein_coding	0.10916	0.827425	0.165751	0.784291
ENSMUST00000137075	Tle1	protein_coding	0.0627793	0.952092	0.424268	0.837017
ENSMUST00000137074	Scly	protein_coding	-0.426903	0.512824	-0.631599	0.636285
ENSMUST00000137071	Ehmt2	protein_coding	-0.0610538	0.915012	0.00460432	0.996614
ENSMUST00000137070	Gdap1l1	protein_coding	-0.401914	0.585153	-0.536497	0.692306
ENSMUST00000149547	Sgip1	protein_coding	0.169772	0.783591	0.112818	0.916751
ENSMUST00000118313	Osbpl1a	protein_coding	-0.0186393	0.953806	-0.000778865	0.998452
ENSMUST00000029131	Ggt7	protein_coding	0.0783137	0.561962	0.0756293	0.723772
ENSMUST00000029135	Acss2	protein_coding	0.0852981	0.587857	0.0842356	0.735885
ENSMUST00000105511	Col10a1	protein_coding	3.43981	1.66396e-11	5.20707	0.00311072
ENSMUST00000105510	Hdac2	protein_coding	-0.625263	0.0728799	-0.738093	0.170083
ENSMUST00000105512	Nt5dc1	protein_coding	-0.0690317	0.944951	1.16272	0.921207
ENSMUST00000105516	Themis	protein_coding	-0.612535	0.197904	-0.74881	0.106155
ENSMUST00000105519	L3mbtl3	protein_coding	-0.326006	0.122778	-0.321521	0.155502
ENSMUST00000165466	2610042L04Rik	protein_coding	-0.533626	0.368273	-0.598588	0.593775
ENSMUST00000022108	Hapln1	protein_coding	0.292636	0.00181873	0.292727	0.0256751
ENSMUST00000187733	Trip12	protein_coding	0.787539	0.00544692	0.823828	0.0163704
ENSMUST00000119043	Osbpl1a	protein_coding	0.953166	0.0450364	1.18119	0.763753
ENSMUST00000022100	Slc6a3	protein_coding	-0.272099	0.779759	-0.560062	0.771471
ENSMUST00000119047	Tmem128	protein_coding	0.126239	0.874294	0.0456379	0.976592
ENSMUST00000022104	Tert	protein_coding	-0.672618	0.0110885	-0.756799	0.00394567
ENSMUST00000031779	Calu	protein_coding	1.18803	5.86089e-14	1.21857	1.90655e-09
ENSMUST00000031773	Pon3	protein_coding	0.310809	0.52415	0.467329	0.280117
ENSMUST00000108161	U2af1l4	protein_coding	0.272131	0.632531	0.335913	0.828979
ENSMUST00000108165	Proser3	protein_coding	-0.323309	0.308646	-0.332216	0.277873
ENSMUST00000108164	Lin37	protein_coding	-0.0947656	0.868255	-0.126654	0.880166
ENSMUST00000023856	Msrb2	protein_coding	-0.215069	0.395785	-0.225847	0.46542
ENSMUST00000186282	Usp37	protein_coding	1.09156	0.0564247	1.48747	0.0867219
ENSMUST00000170146	Kcnb2	protein_coding	0.0711944	0.66462	0.0630958	0.823508
ENSMUST00000114740	Maats1	protein_coding	-0.105292	0.786783	-0.111429	0.786999
ENSMUST00000170142	Dfna5	protein_coding	-0.472455	0.0434504	-0.509116	0.0686112
ENSMUST00000173369	Trim39	protein_coding	0.362408	0.371533	0.405724	0.571981
ENSMUST00000170141	Orc6	protein_coding	-0.0851227	0.898222	-0.0707894	0.941205
ENSMUST00000133316	Cenpa	protein_coding	5.55055	8.78012e-120	5.75745	6.91271e-73
ENSMUST00000133317	Bptf	protein_coding	-0.363329	0.684731	-0.591674	0.762462
ENSMUST00000170149	Camk2d	protein_coding	-0.114476	0.911235	-0.371744	0.86549
ENSMUST00000034728	Dock6	protein_coding	0.225894	0.209304	0.228945	0.257301
ENSMUST00000119598	Egfem1	protein_coding	0.682232	0.00161226	0.703031	0.00185721
ENSMUST00000060389	Rspry1	protein_coding	0.0609196	0.817541	0.0448466	0.928316
ENSMUST00000069837	Slit3	protein_coding	-0.0248882	0.916885	-0.0303414	0.917571
ENSMUST00000034720	Polr2m	protein_coding	0.094995	0.648805	0.0859163	0.775934
ENSMUST00000034722	Rab27a	protein_coding	-0.27615	0.320799	-0.280496	0.408437
ENSMUST00000161847	Tmem63a	protein_coding	0.299086	0.732702	0.229822	0.919091
ENSMUST00000114741	Pstpip2	protein_coding	0.0161763	0.965212	-0.0140716	0.981395
ENSMUST00000124812	6430550D23Rik	protein_coding	-0.68585	0.154338	-0.860266	0.0617632
ENSMUST00000031868	Slc13a4	protein_coding	-0.329019	0.540013	-0.21879	0.865052
ENSMUST00000107724	Spop	protein_coding	-0.29817	0.200366	-0.289507	0.570983
ENSMUST00000108295	Unc119	protein_coding	-0.327206	0.567658	-0.408794	0.588299
ENSMUST00000034592	Dscaml1	protein_coding	0.0692986	0.701065	0.0687098	0.759123
ENSMUST00000108297	Pdp1	protein_coding	0.0332141	0.834945	0.0279712	0.934868
ENSMUST00000185398	Mdm4	protein_coding	0.0266979	0.97416	-0.0273067	0.985305
ENSMUST00000108293	Tmem67	protein_coding	-0.516392	0.00145329	-0.532824	0.00210651
ENSMUST00000185393	Tceb1	protein_coding	0.219506	0.547733	0.263573	0.566052
ENSMUST00000161842	Mcoln1	protein_coding	-0.370073	0.364755	-0.429524	0.409426
ENSMUST00000108299	Pdp1	protein_coding	0.0491969	0.93345	-0.0615917	0.954799
ENSMUST00000108298	Ect2	protein_coding	-0.343612	0.633088	-4.79847	0.24271
ENSMUST00000200062	Ak5	protein_coding	-0.0690773	0.85223	-0.0447161	0.952515
ENSMUST00000189999	Bcl2	protein_coding	0.097803	0.901583	0.130022	0.907444
ENSMUST00000112618	Gpd2	protein_coding	0.269352	0.75404	2.2693	0.715186
ENSMUST00000136840	Lrrc14	protein_coding	-0.133969	0.905291	-0.306484	0.929338
ENSMUST00000107725	Tgfbr1	protein_coding	0.0075293	0.97999	0.0101331	0.982308
ENSMUST00000112616	Galnt5	protein_coding	0.114562	0.86064	0.13454	0.85039
ENSMUST00000136848	Numb	protein_coding	0.316585	0.730517	1.10589	0.790329
ENSMUST00000034594	Il10ra	protein_coding	0.594146	0.0151048	0.592185	0.0160528
ENSMUST00000041717	Tcf7l2	protein_coding	-0.0842109	0.944629	0.387699	0.96074
ENSMUST00000209630	Rrm1	protein_coding	-0.507018	0.499169	-0.958938	0.757105
ENSMUST00000118110	Arrdc4	protein_coding	0.00123546	0.998545	-0.0160322	0.989708
ENSMUST00000181779	Gm2916	protein_coding	0.0497004	0.948151	0.118389	0.896828
ENSMUST00000209634	Slc17a7	protein_coding	-0.0721221	0.868104	-0.119859	0.877579
ENSMUST00000209637	Cd163l1	protein_coding	0.424129	0.51491	0.389808	0.91437
ENSMUST00000209639	Numa1	protein_coding	-0.250201	0.617868	-0.353151	0.799836
ENSMUST00000118117	Syt6	protein_coding	0.497107	0.562283	1.56952	0.416673
ENSMUST00000173199	Dtnb	protein_coding	-0.0169083	0.965233	-0.0449963	0.935011
ENSMUST00000070004	Ldhd	protein_coding	0.220623	0.265595	0.221905	0.398341
ENSMUST00000185644	Tfdp2	protein_coding	0.741566	0.171882	0.982703	0.635483
ENSMUST00000176140	Pou6f1	protein_coding	1.16709	0.00061754	1.61222	0.135127
ENSMUST00000070000	Arhgap24	protein_coding	0.0844165	0.860158	0.0971258	0.864163
ENSMUST00000108831	Helz2	protein_coding	0.525497	0.0217554	0.532197	0.059702
ENSMUST00000107824	Zcchc7	protein_coding	0.262061	0.127963	0.25058	0.198993
ENSMUST00000107821	Luc7l3	protein_coding	0.22248	0.174844	0.200196	0.306953
ENSMUST00000108838	Pcbp2	protein_coding	0.14451	0.199447	0.143716	0.410525
ENSMUST00000107829	Nosip	protein_coding	2.94813e-05	0.999937	-0.0976967	0.948423
ENSMUST00000027422	Slc16a14	protein_coding	-0.555478	0.0316379	-0.597841	0.0125247
ENSMUST00000027421	Trip12	protein_coding	-0.0765852	0.56541	-0.0755266	0.858269
ENSMUST00000027426	4933407L21Rik	protein_coding	0.158313	0.816259	0.140562	0.892608
ENSMUST00000166626	Wdr4	protein_coding	-0.345586	0.668307	-0.546789	0.769925
ENSMUST00000027425	Itm2c	protein_coding	0.105718	0.483921	0.103547	0.576363
ENSMUST00000027429	2810459M11Rik	protein_coding	0.543573	0.0960645	0.604281	0.0981515
ENSMUST00000060652	Eny2	protein_coding	-0.195656	0.14734	-0.210135	0.143992
ENSMUST00000060655	Nod1	protein_coding	-0.0936631	0.875632	-0.165812	0.864993
ENSMUST00000106190	1110065P20Rik	protein_coding	0.0961384	0.893015	0.0705248	0.951397
ENSMUST00000106192	Odf2l	protein_coding	-0.497668	0.559743	-3.10273	0.468248
ENSMUST00000106193	Mtf1	protein_coding	-0.122307	0.896359	-0.38447	0.906903
ENSMUST00000106197	Arhgdia	protein_coding	0.161626	0.207056	0.159914	0.270386
ENSMUST00000103116	Ppp1r16b	protein_coding	-0.237652	0.418997	-0.131094	0.895846
ENSMUST00000103115	Plcg1	protein_coding	-0.069398	0.866044	-0.0710427	0.897149
ENSMUST00000103114	Stat3	protein_coding	1.14526	0.000185106	1.45597	7.07575e-06
ENSMUST00000023572	Cxadr	protein_coding	0.861648	9.62184e-07	0.877861	9.31784e-05
ENSMUST00000103112	Zhx3	protein_coding	-0.0317321	0.914536	-0.031193	0.947071
ENSMUST00000103111	Zhx3	protein_coding	-0.539999	0.187258	-0.775817	0.301541
ENSMUST00000103110	Atp6v0a1	protein_coding	0.291357	0.144865	0.286499	0.293677
ENSMUST00000076922	Trim30a	protein_coding	0.131634	0.779723	0.120902	0.845185
ENSMUST00000103119	Zfp385c	protein_coding	-0.0527582	0.954962	-0.111929	0.928283
ENSMUST00000103118	Kat2a	protein_coding	-0.285872	0.299784	-0.317294	0.349399
ENSMUST00000050970	Polr1d	protein_coding	0.436828	0.00828733	0.436898	0.00357943
ENSMUST00000050975	Lingo4	protein_coding	0.123375	0.64908	0.118904	0.728818
ENSMUST00000033040	Pak1	protein_coding	0.0378923	0.868666	0.0345025	0.916751
ENSMUST00000061522	Dnd1	protein_coding	1.19813	3.35759e-06	1.29039	4.74468e-08
ENSMUST00000033044	BC017158	protein_coding	-0.268652	0.0426632	-0.277134	0.10989
ENSMUST00000013497	4931406B18Rik	protein_coding	0.304044	0.611834	0.337203	0.621295
ENSMUST00000033049	Cox6a2	protein_coding	0.0865512	0.929761	0.179738	0.902337
ENSMUST00000190436	CN725425	protein_coding	0.0625375	0.954759	-0.0836172	0.985528
ENSMUST00000190430	Pcbp4	protein_coding	-0.766157	0.156981	-1.07987	0.0877297
ENSMUST00000184112	Trim14	protein_coding	-0.114047	0.911284	-0.14905	0.941674
ENSMUST00000036497	Prkar2b	protein_coding	-0.562854	7.5889e-08	-0.581506	3.28951e-06
ENSMUST00000036493	Atp1a1	protein_coding	0.703918	2.47507e-05	0.70813	0.0031347
ENSMUST00000184118	Meaf6	protein_coding	0.0941298	0.875738	0.106399	0.895145
ENSMUST00000128005	Wdr77	protein_coding	-0.0887827	0.850403	-0.14051	0.844222
ENSMUST00000128003	Cope	protein_coding	0.131539	0.801477	0.141248	0.872315
ENSMUST00000188641	Tceb1	protein_coding	0.188643	0.244554	0.180682	0.329501
ENSMUST00000085790	Mfsd2b	protein_coding	0.129491	0.799186	0.152131	0.806239
ENSMUST00000135009	Col12a1	protein_coding	-0.342066	0.620177	-0.637637	0.710878
ENSMUST00000130037	Kif3a	protein_coding	-0.343718	0.56862	-0.304211	0.835222
ENSMUST00000130032	Carm1	protein_coding	-0.117243	0.853998	-0.284766	0.744053
ENSMUST00000135001	Ptgr2	protein_coding	0.261902	0.783547	1.75838	0.690078
ENSMUST00000037029	9430020K01Rik	protein_coding	0.0971548	0.567809	0.0960369	0.636645
ENSMUST00000154619	Ccdc136	protein_coding	0.0885227	0.89636	-0.0218266	0.990288
ENSMUST00000176254	Fam107b	protein_coding	2.07584	0.000117721	2.75642	0.0344736
ENSMUST00000114268	Snca	protein_coding	0.138736	0.522662	0.131563	0.707817
ENSMUST00000176250	Nptn	protein_coding	0.522375	0.00366895	0.526829	0.0132023
ENSMUST00000073062	Zfp663	protein_coding	-0.490793	0.51491	-0.478589	0.915909
ENSMUST00000176258	Akap7	protein_coding	0.641244	0.371643	1.17739	0.483852
ENSMUST00000142938	Mtmr14	protein_coding	-0.682104	0.205542	-0.942755	0.346293
ENSMUST00000113252	Trmt2b	protein_coding	0.498718	0.104326	0.596098	0.0897763
ENSMUST00000114618	Ezh2	protein_coding	1.15758	0.0230045	1.47735	0.590276
ENSMUST00000089085	Pde10a	protein_coding	-0.482069	6.1542e-05	-0.503706	3.75959e-05
ENSMUST00000114610	Etl4	protein_coding	-0.254677	0.46733	-0.306574	0.358351
ENSMUST00000114614	Etl4	protein_coding	-0.134649	0.901977	-1.31987	0.82659
ENSMUST00000206915	Prr14	protein_coding	0.565625	0.401478	0.430979	0.779819
ENSMUST00000110509	Katnal1	protein_coding	-0.109389	0.898231	-0.201095	0.887732
ENSMUST00000206916	Kdm3a	protein_coding	0.23129	0.709577	0.250111	0.760727
ENSMUST00000048962	Kif4	protein_coding	2.30098	9.50909e-09	2.44867	0.00117125
ENSMUST00000110501	Myef2	protein_coding	-0.78266	0.00140549	-0.799609	0.00149682
ENSMUST00000110504	Sub1	protein_coding	0.662304	3.87031e-06	0.669146	1.71958e-05
ENSMUST00000110505	Hmgb1	protein_coding	0.354056	0.00140178	0.351212	0.0086839
ENSMUST00000154814	Cdpf1	protein_coding	-0.612405	0.437709	-2.29365	0.551195
ENSMUST00000193869	Pcdhga2	protein_coding	0.0286238	0.943188	0.0270434	0.959877
ENSMUST00000085793	BC068281	protein_coding	-0.836207	0.000226739	-0.887685	0.000138269
ENSMUST00000063672	Whrn	protein_coding	-0.218658	0.794166	-0.575524	0.574648
ENSMUST00000053692	Slc38a10	protein_coding	-0.534768	0.315341	-0.6184	0.327735
ENSMUST00000053699	Secisbp2l	protein_coding	-0.442765	2.57553e-05	-0.447704	2.18711e-05
ENSMUST00000169116	Inpp4b	protein_coding	0.328646	0.69062	0.532809	0.908986
ENSMUST00000169114	Erap1	protein_coding	0.0149888	0.956962	0.00343608	0.994474
ENSMUST00000021527	Prkch	protein_coding	0.311689	0.33103	0.35324	0.27629
ENSMUST00000072334	Dnajc5	protein_coding	-0.0228125	0.907922	-0.025845	0.927328
ENSMUST00000191473	Rbpms	protein_coding	0.25592	0.757156	0.155493	0.978125
ENSMUST00000191471	Lmbrd1	protein_coding	0.168662	0.207424	0.168817	0.288058
ENSMUST00000138553	Hmgb1	protein_coding	-0.00390738	0.996041	0.0570156	0.981395
ENSMUST00000138552	Stxbp3	protein_coding	0.181999	0.790271	0.161702	0.864293
ENSMUST00000111678	Ctnnd1	protein_coding	1.9439	5.06446e-06	2.35787	0.159798
ENSMUST00000053521	Zfp27	protein_coding	-0.739445	0.00331408	-0.796886	0.00633854
ENSMUST00000025930	Smc3	protein_coding	-0.491209	0.000171653	-0.503409	0.000166765
ENSMUST00000111670	Ctnnd1	protein_coding	1.70353	2.75548e-10	1.81622	1.34227e-06
ENSMUST00000064545	Limd2	protein_coding	-0.675983	0.00351189	-0.706572	0.0303498
ENSMUST00000189698	Stk16	protein_coding	0.118865	0.631403	0.101108	0.819967
ENSMUST00000189697	Gpr35	protein_coding	-0.420874	0.226746	-0.453546	0.20707
ENSMUST00000028743	Snap23	protein_coding	-0.121457	0.87344	0.831082	0.927793
ENSMUST00000028740	Ttbk2	protein_coding	-0.937727	0.177034	-1.76937	0.5243
ENSMUST00000028741	Haus2	protein_coding	0.0281373	0.975224	-0.155879	0.933966
ENSMUST00000025931	Pdcd4	protein_coding	-0.479973	2.67335e-05	-0.493272	4.28034e-05
ENSMUST00000028748	Capn3	protein_coding	0.343415	0.606879	0.294453	0.883427
ENSMUST00000028749	Capn3	protein_coding	0.107283	0.667505	0.111194	0.685583
ENSMUST00000182511	Plekha7	protein_coding	-0.0272564	0.974202	-0.319866	0.949445
ENSMUST00000182515	Mzf1	protein_coding	0.153869	0.845414	0.264661	0.891472
ENSMUST00000017552	Cacnb1	protein_coding	0.486378	9.19892e-07	0.484665	5.73709e-06
ENSMUST00000115561	Gm5751	protein_coding	0.225607	0.806563	0.399973	0.838026
ENSMUST00000115560	Yeats2	protein_coding	-0.0861338	0.793073	-0.0968974	0.85448
ENSMUST00000115563	Gm6592	protein_coding	-0.440899	0.536131	-0.544599	0.630089
ENSMUST00000115562	Zfp426	protein_coding	0.426947	0.0991027	0.454936	0.18173
ENSMUST00000115567	Nr3c1	protein_coding	-0.470505	0.154106	-0.508242	0.398663
ENSMUST00000110636	Zmynd11	protein_coding	0.137744	0.735906	0.240446	0.848485
ENSMUST00000168247	Zfp110	protein_coding	-0.401062	0.183512	-0.491431	0.160638
ENSMUST00000015950	Qdpr	protein_coding	0.302576	0.1278	0.294153	0.299371
ENSMUST00000025713	Tm7sf2	protein_coding	0.203984	0.603184	0.198802	0.724342
ENSMUST00000208253	Med25	protein_coding	-0.217723	0.0300006	-0.220296	0.190209
ENSMUST00000025714	Rpp30	protein_coding	-0.140316	0.579848	-0.145264	0.658033
ENSMUST00000144429	Flna	protein_coding	2.27982	1.15454e-22	2.53531	8.40849e-06
ENSMUST00000118059	Unc50	protein_coding	-0.458675	0.575056	-1.04695	0.760254
ENSMUST00000208255	Pcf11	protein_coding	0.903197	1.90904e-06	0.935115	2.0575e-05
ENSMUST00000139200	Plekhh3	protein_coding	-0.112612	0.897221	-1.29087	0.895145
ENSMUST00000139204	Syne2	protein_coding	-0.785215	0.246524	-4.61114	0.144117
ENSMUST00000023147	Ciita	protein_coding	-0.372188	0.354129	-0.404824	0.2978
ENSMUST00000004327	G6pdx	protein_coding	0.136514	0.318294	0.135348	0.559875
ENSMUST00000190985	Kcnma1	protein_coding	0.614844	0.290467	1.19174	0.520125
ENSMUST00000119905	Gtf2a2	protein_coding	-0.219278	0.464801	-0.258099	0.444594
ENSMUST00000119902	Tspan2	protein_coding	-0.0290596	0.974146	-0.239493	0.917125
ENSMUST00000190983	Dock10	protein_coding	-0.186631	0.735871	-0.262817	0.83205
ENSMUST00000108459	Klc3	protein_coding	-0.32747	0.599818	-0.594596	0.741288
ENSMUST00000152993	Atpif1	protein_coding	0.116489	0.897842	0.171879	0.89975
ENSMUST00000108458	Klc3	protein_coding	0.287766	0.763255	3.24756	0.396259
ENSMUST00000023146	Nubp1	protein_coding	-0.123376	0.575167	-0.128454	0.655689
ENSMUST00000187389	Matr3	protein_coding	0.0284266	0.950361	-0.026671	0.979794
ENSMUST00000068825	Nub1	protein_coding	-0.0533992	0.752098	-0.0571764	0.821566
ENSMUST00000068822	Zfp37	protein_coding	-0.750104	2.7286e-06	-0.778227	8.22743e-07
ENSMUST00000213029	Aprt	protein_coding	0.31208	0.387521	0.307663	0.467599
ENSMUST00000213027	Ccdc149	protein_coding	-0.189894	0.401068	-0.221147	0.374243
ENSMUST00000123686	Myl12a	protein_coding	0.0108115	0.992951	-0.542665	0.923424
ENSMUST00000189528	Cntn2	protein_coding	-0.0642011	0.898247	-0.0794246	0.916245
ENSMUST00000187382	Vgf	protein_coding	2.45654	8.89602e-21	2.61584	4.22159e-13
ENSMUST00000197452	Ttyh3	protein_coding	0.576156	0.109289	0.677418	0.307988
ENSMUST00000065630	Ddx10	protein_coding	0.306899	0.00240362	0.302287	0.0357072
ENSMUST00000197459	Gbp5	protein_coding	-0.0344202	0.948824	-0.0969993	0.899072
ENSMUST00000069195	Zfp46	protein_coding	-0.844673	1.6044e-16	-0.857398	2.33446e-13
ENSMUST00000040603	Agl	protein_coding	-0.219982	0.24465	-0.211229	0.413493
ENSMUST00000040607	Lsm3	protein_coding	0.193106	0.636473	0.202702	0.68642
ENSMUST00000112936	Rc3h2	protein_coding	-0.0190587	0.9861	-2.18331	0.714149
ENSMUST00000112935	Nmnat3	protein_coding	0.25804	0.77816	0.413094	0.90601
ENSMUST00000112934	Rc3h2	protein_coding	-0.17742	0.388911	-0.189067	0.538319
ENSMUST00000094868	Zfyve28	protein_coding	-0.39042	4.213e-05	-0.399026	0.002182
ENSMUST00000112932	Zbtb6	protein_coding	-0.844792	0.000726693	-0.872201	0.083129
ENSMUST00000112931	Col4a5	protein_coding	0.467667	0.326825	0.713025	0.31151
ENSMUST00000205391	Cebpa	protein_coding	-0.0962167	0.904299	0.195334	0.899301
ENSMUST00000094867	Fam193a	protein_coding	-0.431977	0.0322121	-0.469246	0.0396665
ENSMUST00000112939	Hnrnpd	protein_coding	0.862039	0.000147759	0.89057	0.0075008
ENSMUST00000118896	Sgcz	protein_coding	0.442499	0.372832	0.426054	0.507468
ENSMUST00000197980	Spata1	protein_coding	0.373098	0.618273	0.420522	0.882398
ENSMUST00000051160	Gp1bb	protein_coding	0.271349	0.550661	0.294559	0.542571
ENSMUST00000207351	Mettl9	protein_coding	0.176368	0.648142	0.163097	0.836752
ENSMUST00000204667	Gpr162	protein_coding	0.488163	1.09192e-06	0.488434	0.0051006
ENSMUST00000051169	Edrf1	protein_coding	-0.21639	0.242568	-0.211249	0.405515
ENSMUST00000121291	Pex1	protein_coding	-0.377949	0.00787612	-0.382855	0.00862835
ENSMUST00000212378	Rpl18a	protein_coding	-0.293763	0.656674	-0.545057	0.959257
ENSMUST00000167220	Kdm3a	protein_coding	0.570151	0.210163	0.608839	0.877353
ENSMUST00000212374	Afap1	protein_coding	0.675947	0.163749	0.840959	0.0673017
ENSMUST00000212376	Dock9	protein_coding	-0.183969	0.0398372	-0.185102	0.189655
ENSMUST00000045388	Lyplal1	protein_coding	0.0864424	0.726003	0.0931763	0.792741
ENSMUST00000202622	Eif4h	protein_coding	0.173064	0.313933	0.157207	0.478675
ENSMUST00000043584	Tubb4b	protein_coding	0.423716	0.00202489	0.424912	0.00755584
ENSMUST00000149440	Pde10a	protein_coding	-0.572168	0.453567	-1.35678	0.73956
ENSMUST00000088823	Mapk11	protein_coding	-0.127453	0.613243	-0.114013	0.68642
ENSMUST00000176828	Frmd4a	protein_coding	0.0343401	0.914709	0.0119411	0.982645
ENSMUST00000089558	Snrpg	protein_coding	0.529435	0.0121184	0.575872	0.00169216
ENSMUST00000211549	Fam160a2	protein_coding	0.255793	0.795664	2.93662	0.40347
ENSMUST00000088827	Mapk12	protein_coding	-0.0730173	0.863095	-0.0854934	0.857424
ENSMUST00000101588	Ccdc160	protein_coding	-0.748858	0.0793132	-0.725158	0.113707
ENSMUST00000051784	Fastkd3	protein_coding	-0.648476	0.00052356	-0.68296	7.73864e-05
ENSMUST00000212086	Kcnn1	protein_coding	-0.222951	0.457274	-0.231616	0.507379
ENSMUST00000080371	Mtss1	protein_coding	0.0190448	0.92666	0.0168683	0.962291
ENSMUST00000212084	Kcnn1	protein_coding	-0.235262	0.810428	-0.282177	0.901781
ENSMUST00000212081	Cmtm3	protein_coding	0.405403	0.539655	0.652846	0.745154
ENSMUST00000153117	Taf6	protein_coding	-0.586963	0.448121	-0.739309	0.824193
ENSMUST00000153115	D1Ertd622e	protein_coding	-0.192832	0.56305	-0.234147	0.592407
ENSMUST00000153112	Rtel1	protein_coding	0.295899	0.748918	0.347973	0.866274
ENSMUST00000209123	Uvrag	protein_coding	0.431531	0.203658	0.352065	0.558156
ENSMUST00000205531	Hddc3	protein_coding	-0.0161085	0.986203	-0.0523614	0.96989
ENSMUST00000205537	Klk8	protein_coding	0.328995	0.580266	0.385666	0.7369
ENSMUST00000145467	Gak	protein_coding	1.63368	4.77709e-09	1.75098	0.000247812
ENSMUST00000117146	Ube2w	protein_coding	0.108457	0.435468	0.105884	0.588799
ENSMUST00000205538	Slc3a2	protein_coding	-0.386009	0.643121	-0.683643	0.738221
ENSMUST00000077200	Pak7	protein_coding	-0.252632	0.399694	-0.270014	0.458285
ENSMUST00000033695	Abcb7	protein_coding	-0.203304	0.0787594	-0.20774	0.154212
ENSMUST00000048192	Haus1	protein_coding	0.179242	0.644939	0.206336	0.609955
ENSMUST00000057784	Slc7a2	protein_coding	0.0240552	0.958132	0.00195971	0.997883
ENSMUST00000113637	Arhgap25	protein_coding	-0.188403	0.797299	-0.233031	0.846321
ENSMUST00000041262	Churc1	protein_coding	0.17148	0.375284	0.174886	0.446804
ENSMUST00000041264	Zfp938	protein_coding	-0.516013	0.0164975	-0.540101	0.047272
ENSMUST00000041266	Fndc4	protein_coding	0.307652	0.20285	0.318607	0.239938
ENSMUST00000057783	Gpr22	protein_coding	0.950538	1.325e-20	0.954182	5.64697e-23
ENSMUST00000127924	Flna	protein_coding	1.64294	0.00424067	2.55824	0.0615281
ENSMUST00000127921	Zfp142	protein_coding	0.329011	0.484613	0.558199	0.415815
ENSMUST00000109418	Fitm2	protein_coding	-0.518899	0.000494023	-0.532819	0.000190896
ENSMUST00000093844	Chrna5	protein_coding	-0.0873863	0.881631	-0.0879434	0.891472
ENSMUST00000098814	Lig1	protein_coding	0.42987	0.0401343	0.47547	0.0620649
ENSMUST00000098817	Vps37a	protein_coding	0.300488	0.00835382	0.300346	0.0101366
ENSMUST00000098816	Slc7a2	protein_coding	-0.0751029	0.889791	-0.140339	0.855423
ENSMUST00000156690	Mef2a	protein_coding	-0.194334	0.0585247	-0.198283	0.127457
ENSMUST00000109415	Bod1	protein_coding	0.8186	0.00531513	0.908602	0.00293621
ENSMUST00000156695	Ica1	protein_coding	0.148014	0.877766	0.379231	0.911161
ENSMUST00000113631	Rgag4	protein_coding	1.46107	5.55099e-06	1.56074	0.0041822
ENSMUST00000166578	Nhp2l1	protein_coding	1.57	0.00032265	1.90088	0.000246119
ENSMUST00000134933	Zfp444	protein_coding	-0.226769	0.77048	-0.260976	0.8635
ENSMUST00000110987	Slc12a6	protein_coding	0.0436647	0.910126	0.0328558	0.953743
ENSMUST00000159879	Trove2	protein_coding	-0.313202	0.00807066	-0.323269	0.00637768
ENSMUST00000092551	Lrp2	protein_coding	-0.202218	0.698733	-0.222559	0.726584
ENSMUST00000159871	Coq9	protein_coding	-0.884237	0.138812	-1.35418	0.190229
ENSMUST00000057258	Zfp518b	protein_coding	-0.634374	0.00750231	-0.751931	0.812161
ENSMUST00000097709	Idh1	protein_coding	0.147648	0.298512	0.143444	0.473888
ENSMUST00000057256	6030458C11Rik	protein_coding	-0.608653	5.91802e-06	-0.623456	2.28162e-06
ENSMUST00000057257	Jkamp	protein_coding	-0.238527	0.346421	-0.244193	0.431554
ENSMUST00000047835	Scaf11	protein_coding	-0.508258	1.63551e-07	-0.517586	1.81275e-06
ENSMUST00000076155	Eno1b	protein_coding	0.145677	0.305828	0.144392	0.359321
ENSMUST00000002112	Trappc6a	protein_coding	0.26798	0.407188	0.279039	0.3852
ENSMUST00000120653	Kcnu1	protein_coding	-0.0065699	0.990927	-0.0114791	0.98714
ENSMUST00000142676	Pccb	protein_coding	-0.236262	0.790219	-0.0522685	0.984192
ENSMUST00000046122	Lap3	protein_coding	0.27496	0.0444741	0.272251	0.049875
ENSMUST00000120655	Mmp12	protein_coding	-0.482174	0.519659	-3.32968	0.388943
ENSMUST00000005830	Bcas2	protein_coding	-0.0805957	0.768243	-0.0885849	0.80464
ENSMUST00000108988	Usp10	protein_coding	-0.033669	0.882174	-0.041394	0.897383
ENSMUST00000165175	Sv2b	protein_coding	-0.238533	0.328109	-0.245932	0.559773
ENSMUST00000165177	Rsl24d1	protein_coding	0.125316	0.905291	0.293077	0.894613
ENSMUST00000132207	St18	protein_coding	-0.150039	0.891643	-0.354898	0.878532
ENSMUST00000132202	Wbp1l	protein_coding	-0.395736	0.0386442	-0.367178	0.358467
ENSMUST00000191973	Kmt2d	protein_coding	0.157131	0.751367	0.214003	0.727897
ENSMUST00000153800	Fcho1	protein_coding	-0.127097	0.883475	-0.402996	0.700614
ENSMUST00000097809	Rims1	protein_coding	-0.0701454	0.846368	-0.0819078	0.897598
ENSMUST00000153803	Dcaf10	protein_coding	0.689361	0.351961	0.568636	0.909984
ENSMUST00000090952	Fmnl2	protein_coding	0.116332	0.388031	0.115162	0.606918
ENSMUST00000110260	Lzts3	protein_coding	-0.399474	0.0161925	-0.41377	0.106701
ENSMUST00000110262	Fastkd5	protein_coding	0.0872254	0.791729	0.0724167	0.864294
ENSMUST00000151408	Rasgrf2	protein_coding	-0.546094	8.04497e-13	-0.551829	7.89779e-08
ENSMUST00000178882	Gm3893	protein_coding	5.21863e-05	0.999914	-0.00346412	0.997045
ENSMUST00000178884	Rasgrp1	protein_coding	-0.174872	0.385951	-0.176837	0.576946
ENSMUST00000159258	Lmo7	protein_coding	0.713903	0.0053338	0.759327	0.0372594
ENSMUST00000036992	Lmo1	protein_coding	-0.398867	0.37917	-0.488262	0.460764
ENSMUST00000159252	Phc1	protein_coding	0.387857	0.587369	0.687469	0.820327
ENSMUST00000074792	Mtfmt	protein_coding	-0.709377	6.55317e-05	-0.741553	2.93691e-06
ENSMUST00000159250	Zbtb37	protein_coding	-0.0197418	0.982489	0.0418177	0.997258
ENSMUST00000042717	Trim39	protein_coding	0.315886	0.216662	0.327838	0.30558
ENSMUST00000200575	Sez6l	protein_coding	-0.732921	0.118936	-0.786045	0.526758
ENSMUST00000200577	Krit1	protein_coding	-0.430267	0.160895	-0.525325	0.187706
ENSMUST00000085050	Serpina3c	protein_coding	-0.317758	0.70707	-0.436684	0.808982
ENSMUST00000167766	Zdhhc2	protein_coding	0.354052	0.541992	0.269457	0.830472
ENSMUST00000200570	Zzz3	protein_coding	0.525989	0.0258306	0.671021	0.17639
ENSMUST00000167764	Fgfr1	protein_coding	2.05989	4.1837e-09	2.58335	5.59637e-05
ENSMUST00000207708	Unc13b	protein_coding	0.0172442	0.960936	0.0124203	0.982623
ENSMUST00000208707	Eif3k	protein_coding	-0.000294008	0.999564	-0.00919457	0.990892
ENSMUST00000141722	Stxbp5	protein_coding	-0.0625048	0.734114	-0.070265	0.777862
ENSMUST00000094004	Abhd15	protein_coding	-0.389179	0.494272	-0.440051	0.494787
ENSMUST00000094002	D7Ertd443e	protein_coding	0.0120471	0.989668	-0.113137	0.929338
ENSMUST00000123351	Npr2	protein_coding	0.404823	0.303448	0.490438	0.225256
ENSMUST00000006562	Hyi	polymorphic_pseudogene	0.0233166	0.964305	0.0393125	0.96153
ENSMUST00000169656	Fbxo16	protein_coding	-0.533237	0.0279414	-0.558054	0.0359258
ENSMUST00000169657	B430203G13Rik	protein_coding	-0.405077	0.273379	-0.443708	0.418754
ENSMUST00000169651	Nlrx1	protein_coding	-0.0502551	0.953995	0.137737	0.979976
ENSMUST00000169652	Tifab	protein_coding	0.224336	0.629189	0.291451	0.489641
ENSMUST00000006565	Cdc20	protein_coding	0.365152	0.59479	0.44389	0.677863
ENSMUST00000133154	Fnip2	protein_coding	-0.436634	0.000545341	-0.451649	0.000222898
ENSMUST00000133157	Polr1e	protein_coding	-0.109169	0.849728	-0.169196	0.791982
ENSMUST00000133150	Zfp62	protein_coding	-0.000146703	0.999898	-0.0129333	0.993592
ENSMUST00000169659	Pfkfb2	protein_coding	-0.0959508	0.749045	-0.100096	0.799807
ENSMUST00000164225	Med12l	protein_coding	-0.021054	0.949792	0.0135959	0.98152
ENSMUST00000161080	Nmrk1	protein_coding	-0.37863	0.446209	-0.444341	0.49105
ENSMUST00000161085	Herpud1	protein_coding	0.671927	0.212045	0.908741	0.540564
ENSMUST00000201623	Zeb2	protein_coding	-0.0868021	0.909929	-0.172605	0.88008
ENSMUST00000201621	Khk	protein_coding	0.888679	0.0293439	0.994389	0.142885
ENSMUST00000201627	Tcf4	protein_coding	0.122801	0.816318	0.130954	0.854623
ENSMUST00000089003	Atp2b2	protein_coding	-0.487565	7.81366e-12	-0.491972	4.54108e-06
ENSMUST00000162682	Pcmt1	protein_coding	0.44477	0.343081	0.561009	0.267586
ENSMUST00000162681	Pam	protein_coding	2.03853	1.65447e-18	2.20362	1.77818e-08
ENSMUST00000162686	Tyw5	protein_coding	0.164603	0.693644	0.208247	0.720772
ENSMUST00000162685	Cnih3	protein_coding	-0.839275	0.048037	-1.09855	0.480254
ENSMUST00000038842	Ppp1r32	protein_coding	0.287648	0.626341	0.382914	0.592456
ENSMUST00000160930	Sepp1	protein_coding	0.340951	0.0654735	0.354663	0.041679
ENSMUST00000160937	Dlx6	protein_coding	0.101185	0.774724	0.0884075	0.855423
ENSMUST00000160934	Tnik	protein_coding	1.30776	6.97287e-16	1.40267	3.89396e-14
ENSMUST00000160507	Sucla2	protein_coding	0.212498	0.139145	0.211815	0.151702
ENSMUST00000161339	Adra1a	protein_coding	0.248618	0.72219	0.127493	0.964941
ENSMUST00000161338	Man2c1	protein_coding	-0.717252	0.280072	-0.86621	0.495798
ENSMUST00000121357	Gramd1b	protein_coding	0.354398	0.0015576	0.353776	0.00151304
ENSMUST00000161331	Rnf6	protein_coding	-0.274898	0.698901	-0.316127	0.799383
ENSMUST00000161330	Ric1	protein_coding	0.841632	0.00245414	0.863172	0.0356976
ENSMUST00000161336	Agl	protein_coding	-0.419541	0.212739	-0.476818	0.173039
ENSMUST00000161335	Aebp2	protein_coding	0.215643	0.619665	0.321857	0.579982
ENSMUST00000026173	Wdr45b	protein_coding	0.664738	8.04821e-10	0.666597	1.98181e-10
ENSMUST00000017610	Timp2	protein_coding	0.0343701	0.901368	0.0261928	0.95455
ENSMUST00000122409	Lrp3	protein_coding	-0.151104	0.424715	-0.158857	0.460063
ENSMUST00000026175	Fn3k	protein_coding	-0.231525	0.240603	-0.240318	0.278304
ENSMUST00000176149	Evi5l	protein_coding	-0.0416133	0.764299	-0.0469651	0.864294
ENSMUST00000122402	Farp2	protein_coding	-0.408152	0.256092	-0.502854	0.183588
ENSMUST00000181573	Zfp87	protein_coding	0.250455	0.768873	0.471066	0.785876
ENSMUST00000200390	Pisd	protein_coding	-0.0912266	0.728241	-0.115348	0.72505
ENSMUST00000200393	Ints1	protein_coding	0.0975114	0.677286	0.122242	0.78929
ENSMUST00000200392	Fxr1	protein_coding	0.200475	0.340266	0.209059	0.429554
ENSMUST00000200397	St6galnac3	protein_coding	0.176208	0.363953	0.172458	0.408936
ENSMUST00000160684	Bid	protein_coding	-0.476389	0.472833	-4.61603	0.375045
ENSMUST00000160681	Hcfc2	protein_coding	-0.815548	7.39686e-07	-0.855252	2.78661e-07
ENSMUST00000160682	Ubl5	protein_coding	0.344311	0.137904	0.323883	0.347869
ENSMUST00000075540	Mcm9	protein_coding	-0.287104	0.100075	-0.298354	0.189458
ENSMUST00000106460	Itgb4	protein_coding	0.114433	0.906994	0.153472	0.964688
ENSMUST00000087360	Rbpj	protein_coding	0.493156	0.0980677	0.434326	0.658033
ENSMUST00000087366	Creb1	protein_coding	-0.129787	0.661446	-0.140517	0.78203
ENSMUST00000023525	Gtf2e1	protein_coding	-0.418924	0.00115782	-0.429141	0.00432292
ENSMUST00000143052	Vezf1	protein_coding	0.0777998	0.906887	0.141723	0.895901
ENSMUST00000095874	9230019H11Rik	protein_coding	0.0533046	0.955906	-0.0164235	0.991126
ENSMUST00000122006	Ramp2	protein_coding	-0.441627	0.231718	-0.487622	0.398684
ENSMUST00000176144	Has3	protein_coding	0.296624	0.566502	0.347537	0.687924
ENSMUST00000170048	A930033H14Rik	protein_coding	0.471664	0.0467662	0.508601	0.0304878
ENSMUST00000202781	Mthfd2l	protein_coding	0.111572	0.861967	0.0535086	0.960111
ENSMUST00000163799	Stard10	protein_coding	0.0385287	0.958132	0.105866	0.916195
ENSMUST00000170046	Mtbp	protein_coding	-0.692981	0.207222	-0.853408	0.421038
ENSMUST00000019649	Ubb	protein_coding	0.521553	0.000805287	0.52341	0.0129823
ENSMUST00000198768	Fbrsl1	protein_coding	-0.0885448	0.928472	-2.21558	0.793117
ENSMUST00000134310	Plcb4	protein_coding	0.465185	0.581327	1.25521	0.754369
ENSMUST00000139803	Rev3l	protein_coding	0.584916	0.00774073	0.640175	0.0247576
ENSMUST00000033283	Rrm1	protein_coding	-0.0697424	0.74435	-0.0757704	0.81335
ENSMUST00000033282	Bccip	protein_coding	0.160589	0.279371	0.154307	0.399198
ENSMUST00000033289	Stim1	protein_coding	0.0355315	0.828375	0.0357439	0.907229
ENSMUST00000124763	Bsn	protein_coding	0.181945	0.6394	0.237777	0.771711
ENSMUST00000124764	Plpp5	protein_coding	-0.161751	0.769114	-0.183867	0.844825
ENSMUST00000030882	Pmpcb	protein_coding	-0.0223829	0.925837	-0.0285218	0.928627
ENSMUST00000124768	Hexdc	protein_coding	-0.101275	0.848681	-0.064423	0.938957
ENSMUST00000030884	Mfn2	protein_coding	-0.132973	0.656402	-0.14022	0.826083
ENSMUST00000030886	Miip	protein_coding	-0.634116	9.62633e-05	-0.635478	0.000910213
ENSMUST00000043870	Polr2l	protein_coding	0.232893	0.339319	0.221045	0.450629
ENSMUST00000076939	C1qtnf7	protein_coding	-0.635174	0.30688	-0.749984	0.510864
ENSMUST00000066412	Agtr1a	protein_coding	-0.494174	0.437614	-0.565038	0.527341
ENSMUST00000163246	Slc25a3	protein_coding	2.00081	3.53736e-18	2.07273	6.35031e-08
ENSMUST00000171562	Plec	protein_coding	-0.165605	0.800565	-4.72105	0.575452
ENSMUST00000175714	Apobec3	protein_coding	0.120645	0.893683	0.0491671	0.984263
ENSMUST00000085206	Slc25a36	protein_coding	0.316154	0.0103662	0.33141	0.0383187
ENSMUST00000021963	Caml	protein_coding	-0.546556	0.00533821	-0.567933	0.0143103
ENSMUST00000124499	Lcp1	protein_coding	0.448786	0.611054	3.14195	0.300617
ENSMUST00000001155	Araf	protein_coding	-0.064235	0.893373	-0.0593366	0.921059
ENSMUST00000212545	Pkd1l3	protein_coding	-0.0502973	0.937164	0.132074	0.901484
ENSMUST00000184053	Zfp280d	protein_coding	-0.255772	0.74788	-0.489946	0.761068
ENSMUST00000042470	Zkscan2	protein_coding	-0.455547	0.00379084	-0.4636	0.00621928
ENSMUST00000020382	Yeats4	protein_coding	-0.159333	0.347665	-0.172467	0.393709
ENSMUST00000020383	Atp8b3	protein_coding	-0.14273	0.888476	-0.297514	0.882184
ENSMUST00000020381	Frs2	protein_coding	-0.142181	0.450068	-0.149814	0.507023
ENSMUST00000185985	Gramd1a	protein_coding	0.301262	0.00467302	0.301839	0.0157082
ENSMUST00000172035	Gemin5	protein_coding	-0.544323	0.00173745	-0.553523	0.00133104
ENSMUST00000042477	Vps25	protein_coding	-0.00857894	0.980823	-0.014169	0.979976
ENSMUST00000172031	Inpp4b	protein_coding	0.313885	0.133518	0.286905	0.215849
ENSMUST00000179919	Samd11	protein_coding	0.298701	0.389493	0.25214	0.542056
ENSMUST00000004681	Pnpla6	protein_coding	-0.0659074	0.702805	-0.0700249	0.84651
ENSMUST00000004684	Arhgef18	protein_coding	-0.370911	0.000160295	-0.379087	0.00249846
ENSMUST00000004686	Pex11g	protein_coding	-0.132681	0.799146	-0.116671	0.849505
ENSMUST00000073884	Nrg1	protein_coding	-0.101189	0.90805	-0.270516	0.884435
ENSMUST00000032629	Cyfip1	protein_coding	-0.142855	0.449858	-0.140387	0.558156
ENSMUST00000073889	Polg	protein_coding	0.125073	0.234286	0.12209	0.576716
ENSMUST00000032627	Tubgcp5	protein_coding	-0.528381	0.000618583	-0.562684	0.000872189
ENSMUST00000032622	Zfp773	protein_coding	-1.11003	7.95598e-05	-1.22231	1.48356e-05
ENSMUST00000105230	Sarnp	protein_coding	0.176386	0.435978	0.16542	0.574915
ENSMUST00000170767	Gcc1	protein_coding	-0.210483	0.72308	-0.266102	0.745489
ENSMUST00000109993	Tcn2	protein_coding	0.0273728	0.96529	0.157762	0.846412
ENSMUST00000105233	Ikzf4	protein_coding	-0.91606	0.149748	-1.16559	0.702981
ENSMUST00000109995	Slc35e4	protein_coding	0.739768	0.239404	4.6982	0.266753
ENSMUST00000105235	Smarcc2	protein_coding	-0.00518395	0.984421	-0.00967866	0.979976
ENSMUST00000109997	Zfp961	protein_coding	-0.631424	0.216379	-0.856169	0.770006
ENSMUST00000105238	Stat2	protein_coding	-0.34201	0.633969	-0.365815	0.941674
ENSMUST00000075884	Msln	protein_coding	0.202627	0.778345	0.276216	0.797536
ENSMUST00000038874	Scai	protein_coding	-0.0269682	0.899704	-0.0371188	0.88945
ENSMUST00000063888	Pld4	protein_coding	0.240267	0.221281	0.228405	0.351362
ENSMUST00000130541	Fggy	protein_coding	0.425498	0.518683	0.535279	0.580576
ENSMUST00000072133	Gm10226	protein_coding	-0.541222	0.408713	-0.698209	0.545791
ENSMUST00000061995	Spryd4	protein_coding	-0.0477761	0.917852	-0.0483819	0.928152
ENSMUST00000021381	Pnn	protein_coding	0.266763	0.0221159	0.265053	0.025422
ENSMUST00000021380	Trappc6b	protein_coding	-0.148663	0.47529	-0.169508	0.492441
ENSMUST00000035931	Pcdh18	protein_coding	-0.281877	0.660498	-0.482014	0.822335
ENSMUST00000035930	Zfp800	protein_coding	0.765949	0.00651807	0.787724	0.0069084
ENSMUST00000035935	Ccdc40	protein_coding	-0.170912	0.775868	-0.129262	0.88445
ENSMUST00000035934	Exoc3	protein_coding	-0.155263	0.206277	-0.160962	0.276253
ENSMUST00000110063	Macrod2	protein_coding	0.685295	0.339034	1.05859	0.474752
ENSMUST00000138134	Gramd4	protein_coding	-0.361076	0.383647	-0.451305	0.469779
ENSMUST00000029588	Larp7	protein_coding	0.448306	1.07753e-05	0.449138	0.00133742
ENSMUST00000029587	Neurog2	protein_coding	0.504789	0.363108	0.532281	0.492104
ENSMUST00000176645	Evi5l	protein_coding	0.462039	0.401911	0.622783	0.252665
ENSMUST00000176640	Senp6	protein_coding	-0.39	0.452825	-0.489761	0.38783
ENSMUST00000002655	Mien1	protein_coding	0.244276	0.143984	0.24463	0.125489
ENSMUST00000180252	Tmem151b	protein_coding	0.32528	0.00923257	0.328995	0.0117124
ENSMUST00000140842	Xaf1	protein_coding	-0.241438	0.710869	-0.418426	0.576864
ENSMUST00000136263	Ogg1	protein_coding	-0.249134	0.636537	-0.329569	0.581229
ENSMUST00000031562	Zfp513	protein_coding	0.678038	0.0991907	0.797951	0.16965
ENSMUST00000110066	Gpr68	protein_coding	-1.06586	7.16216e-05	-1.21036	2.72899e-05
ENSMUST00000028187	Lamc3	protein_coding	0.058622	0.907961	0.0773924	0.900515
ENSMUST00000028188	Fibcd1	protein_coding	-0.513372	0.132007	-0.468287	0.520183
ENSMUST00000052631	Snai1	protein_coding	-0.177813	0.860932	0.017132	0.995245
ENSMUST00000021039	Lig3	protein_coding	-1.08663	0.0708577	-2.09165	0.590022
ENSMUST00000009689	Kcnq1	protein_coding	0.418214	0.563845	0.323275	0.859492
ENSMUST00000021033	Rad51d	protein_coding	-0.646964	0.299898	-5.2933	0.0636016
ENSMUST00000078856	Kl	protein_coding	-0.722636	1.03381e-10	-0.729522	1.99185e-07
ENSMUST00000132945	Pkn1	protein_coding	-0.398722	0.477305	-0.550299	0.512918
ENSMUST00000140743	Hnrnph3	protein_coding	0.577039	0.00704646	0.579422	0.0179756
ENSMUST00000174863	Ciao1	protein_coding	-0.601425	0.10812	-0.681837	0.364528
ENSMUST00000121685	Tfam	protein_coding	-0.749031	0.181841	-1.06191	0.23876
ENSMUST00000155778	Zdhhc3	protein_coding	0.138046	0.836125	0.0686671	0.954392
ENSMUST00000183914	St7l	protein_coding	-0.389727	0.279192	-0.487662	0.436418
ENSMUST00000183913	Col27a1	protein_coding	0.234117	0.678266	0.289334	0.750923
ENSMUST00000059914	1110037F02Rik	protein_coding	-0.219821	0.158489	-0.224736	0.169749
ENSMUST00000117989	Ngrn	protein_coding	-0.459163	0.00317364	-0.481651	0.000764805
ENSMUST00000183918	Tcf12	protein_coding	-0.602299	0.00133671	-0.624093	0.105401
ENSMUST00000173073	Kmt2c	protein_coding	-0.0524479	0.951159	-0.0316119	0.985234
ENSMUST00000173072	Rnf39	protein_coding	0.0681574	0.944542	0.0248962	0.988658
ENSMUST00000115619	Rbm3	protein_coding	1.42481	1.64336e-07	1.4922	7.12197e-06
ENSMUST00000173078	Otud4	protein_coding	-0.41132	0.000196557	-0.423955	0.00605049
ENSMUST00000148517	Mfap5	protein_coding	0.504661	0.493659	1.03107	0.391043
ENSMUST00000148515	Speg	protein_coding	-0.260602	0.476087	-0.307155	0.507199
ENSMUST00000022600	Mtrf1	protein_coding	-0.782798	0.00313501	-0.836628	0.00146259
ENSMUST00000022603	Lect1	protein_coding	1.24224	0.0135209	1.41296	0.154799
ENSMUST00000039476	Arhgef11	protein_coding	-0.135582	0.461727	-0.146467	0.545366
ENSMUST00000142064	Dpy19l1	protein_coding	-0.135699	0.394275	-0.140101	0.534875
ENSMUST00000182063	Gm5493	protein_coding	-0.0638478	0.937391	-0.0822508	0.948423
ENSMUST00000182064	Ank2	protein_coding	-0.264635	0.0124539	-0.270134	0.0241559
ENSMUST00000182066	Arhgap12	protein_coding	-0.253967	0.442819	-0.291384	0.503205
ENSMUST00000021048	Ftsj3	protein_coding	-0.212315	0.249675	-0.226399	0.2532
ENSMUST00000137133	Fam107a	protein_coding	0.141365	0.666484	0.124109	0.750048
ENSMUST00000111899	Pprc1	protein_coding	0.695918	6.78956e-07	0.729067	4.74325e-06
ENSMUST00000169061	Drosha	protein_coding	-0.0209198	0.976373	0.105426	0.92825
ENSMUST00000189327	Nop58	protein_coding	0.225046	0.817361	0.0497806	0.983413
ENSMUST00000189324	Pdzd2	protein_coding	0.235205	0.791866	0.185088	0.928642
ENSMUST00000066497	Zfp24	protein_coding	0.168324	0.0986087	0.165993	0.337125
ENSMUST00000115616	Rbm3	protein_coding	0.417387	0.128115	0.378911	0.441889
ENSMUST00000066498	Tmem255a	protein_coding	-0.311365	0.130326	-0.367498	0.151603
ENSMUST00000115615	Rbm3	protein_coding	0.654458	0.0159221	0.607736	0.209071
ENSMUST00000177517	Unc13a	protein_coding	0.247344	0.281596	0.245613	0.501512
ENSMUST00000112176	Tmsb4x	protein_coding	0.781813	0.0040921	0.899959	0.00453193
ENSMUST00000030412	Ppt1	protein_coding	0.31521	0.0119271	0.316776	0.00954088
ENSMUST00000030417	Cdc42	protein_coding	0.375782	0.00354198	0.370642	0.00738045
ENSMUST00000126226	Kcnu1	protein_coding	-0.000908361	0.998898	-0.00345664	0.998132
ENSMUST00000152200	Cetn2	protein_coding	0.280506	0.745409	0.796197	0.565063
ENSMUST00000152205	Clk2	protein_coding	-0.438085	0.397999	-0.494145	0.422311
ENSMUST00000084027	Fgfr1	protein_coding	0.993937	1.34034e-09	1.02839	4.55407e-07
ENSMUST00000152207	Trim56	protein_coding	0.423663	0.594855	0.621238	0.717392
ENSMUST00000043709	Gna15	protein_coding	0.289098	0.453639	0.301993	0.490502
ENSMUST00000098548	Scn1b	protein_coding	0.218229	0.328135	0.205174	0.589822
ENSMUST00000063824	Rasal3	protein_coding	0.276149	0.718235	0.183388	0.96153
ENSMUST00000064831	Entpd4	protein_coding	-0.307379	0.0921215	-0.319379	0.147386
ENSMUST00000063820	F10	protein_coding	0.113307	0.846628	0.0930011	0.909231
ENSMUST00000186368	Nmnat2	protein_coding	0.505868	0.024562	0.477812	0.11376
ENSMUST00000186360	Adgrb1	protein_coding	1.62477	3.61132e-06	2.07765	0.0103705
ENSMUST00000186364	Plscr1	protein_coding	0.269448	0.632291	0.354627	0.632657
ENSMUST00000123766	Lpcat1	protein_coding	-0.370288	0.687253	-2.82354	0.589714
ENSMUST00000116586	Robo2	protein_coding	0.273523	0.371413	0.214068	0.632938
ENSMUST00000119650	Atxn7l2	protein_coding	-0.274722	0.745097	-0.258022	0.947795
ENSMUST00000205433	2610021A01Rik	protein_coding	-1.15788	0.0166049	-1.38995	0.0550466
ENSMUST00000113869	Tsc1	protein_coding	-0.575068	0.42308	-4.29357	0.299789
ENSMUST00000202421	Supt7l	protein_coding	-0.364767	0.391871	-0.4362	0.246421
ENSMUST00000202422	Nsun5	protein_coding	-0.311611	0.739545	-0.529405	0.82239
ENSMUST00000113862	Kcnj15	protein_coding	-0.0697458	0.944352	-0.3116	0.851506
ENSMUST00000204197	Pthlh	protein_coding	0.298592	0.742033	-0.663881	0.942154
ENSMUST00000113867	Tsc1	protein_coding	-0.0761615	0.821247	-0.029205	0.964558
ENSMUST00000113864	Las1l	protein_coding	0.255681	0.473145	0.28685	0.575911
ENSMUST00000113865	Rbpj	protein_coding	0.850252	0.000223592	0.830651	0.00837919
ENSMUST00000107162	Tenm4	protein_coding	-0.0514782	0.907132	-0.0706293	0.906914
ENSMUST00000108315	Dll3	protein_coding	-0.0136255	0.976162	-0.0338906	0.95809
ENSMUST00000107160	Arnt	protein_coding	-0.345774	0.494599	-0.464294	0.424025
ENSMUST00000107161	Arnt	protein_coding	-0.164098	0.759766	-0.217673	0.79856
ENSMUST00000108318	Ints8	protein_coding	0.270495	0.779354	2.74002	0.403562
ENSMUST00000108319	Ints8	protein_coding	-0.0973392	0.567967	-0.104453	0.662119
ENSMUST00000107168	Mpp3	protein_coding	-0.00511875	0.989845	0.019061	0.979457
ENSMUST00000146092	E2f3	protein_coding	0.151418	0.861392	0.219365	0.870512
ENSMUST00000172856	Znrf1	protein_coding	-0.0123725	0.975317	-0.043266	0.944844
ENSMUST00000023652	Grik1	protein_coding	-0.106807	0.83544	-0.168057	0.836752
ENSMUST00000146374	Tbkbp1	protein_coding	0.327248	0.404164	0.259546	0.612759
ENSMUST00000146377	Ptgr2	protein_coding	0.120019	0.812843	-0.0567706	0.981395
ENSMUST00000147401	Prmt3	protein_coding	-0.0741455	0.950005	-0.343675	0.924454
ENSMUST00000034915	Ctsh	protein_coding	0.171084	0.749486	0.352962	0.933282
ENSMUST00000034912	Rasgrf1	protein_coding	0.0602184	0.766193	0.0546815	0.847317
ENSMUST00000034913	Fam195b	protein_coding	-0.0016539	0.994812	-0.00850539	0.982119
ENSMUST00000034910	Mlip	protein_coding	0.23925	0.800479	-0.275587	0.975079
ENSMUST00000115160	Tmem209	protein_coding	-0.456445	0.00654951	-0.473646	0.00401752
ENSMUST00000086555	Dhx57	protein_coding	-0.307299	0.111277	-0.314881	0.206652
ENSMUST00000202394	Gpn1	protein_coding	0.704553	0.0675258	0.766748	0.0196267
ENSMUST00000016463	Slc25a5	protein_coding	0.445067	0.000884541	0.444996	0.00334963
ENSMUST00000033577	Pbdc1	protein_coding	0.115223	0.638488	0.116642	0.717233
ENSMUST00000129254	Smap1	protein_coding	-0.154306	0.800914	-0.247967	0.851124
ENSMUST00000129256	Vps53	protein_coding	0.20228	0.702448	0.228568	0.690256
ENSMUST00000189817	Dopey1	protein_coding	-0.176942	0.413825	-0.183494	0.494535
ENSMUST00000100672	Samd4	protein_coding	0.0935726	0.883806	-0.034354	0.981823
ENSMUST00000129252	Nab2	protein_coding	0.18154	0.778199	0.304658	0.725934
ENSMUST00000129253	Fbxo44	protein_coding	-0.451511	0.0915266	-0.495892	0.12122
ENSMUST00000138370	Edrf1	protein_coding	-0.000138309	0.999898	-0.146162	0.937608
ENSMUST00000205583	Zfp771	protein_coding	-0.555358	0.329944	-0.680649	0.327066
ENSMUST00000106789	Trim3	protein_coding	-0.146448	0.235939	-0.153166	0.384373
ENSMUST00000065871	Zfp229	protein_coding	0.225302	0.774129	0.0308852	0.992613
ENSMUST00000106781	Pars2	protein_coding	-1.08057	0.000935011	-1.19491	0.00112828
ENSMUST00000106780	Timm10b	protein_coding	0.227438	0.668767	0.289674	0.634107
ENSMUST00000106783	Timm10b	protein_coding	-0.552086	0.00220926	-0.567196	0.00423283
ENSMUST00000103092	Ctsa	protein_coding	-0.328309	0.266736	-0.293777	0.434186
ENSMUST00000103093	Ctsa	protein_coding	0.119823	0.401056	0.116117	0.561078
ENSMUST00000103091	Elmo2	protein_coding	-0.876126	3.95876e-08	-0.893675	3.353e-08
ENSMUST00000103094	Acot8	protein_coding	0.125052	0.6265	0.132156	0.698182
ENSMUST00000070215	Npm3	protein_coding	0.00582504	0.988175	-0.0127292	0.982881
ENSMUST00000103098	Nbr1	protein_coding	0.50894	0.141032	0.613713	0.651814
ENSMUST00000103099	Nbr1	protein_coding	-0.37823	0.359798	-0.490454	0.787958
ENSMUST00000050542	Epc1	protein_coding	0.980609	0.0229377	1.14643	0.0173181
ENSMUST00000150804	Dhodh	protein_coding	-0.605826	0.437845	-1.98227	0.662278
ENSMUST00000112408	Adgrg2	protein_coding	0.581426	0.424144	5.18015	0.208589
ENSMUST00000107786	Cacna1g	protein_coding	-0.369086	0.604413	-0.562561	0.775158
ENSMUST00000021653	Acot3	protein_coding	-1.93811	0.00075565	-4.01162	0.0760027
ENSMUST00000107789	Cacna1g	protein_coding	-0.0113603	0.984638	-0.021029	0.984263
ENSMUST00000178973	Nim1k	protein_coding	0.0829267	0.864839	0.0759384	0.897961
ENSMUST00000068933	Gjc1	protein_coding	0.748143	0.205729	0.997455	0.610477
ENSMUST00000110398	Lrrc16a	protein_coding	0.0707084	0.819667	0.100283	0.818573
ENSMUST00000115832	Dtna	protein_coding	-0.0952782	0.366174	-0.0999433	0.578326
ENSMUST00000115830	Mapre2	protein_coding	1.09712	2.89221e-05	1.174	0.00456504
ENSMUST00000057018	Atp13a4	protein_coding	0.339972	0.709047	-0.324036	0.968454
ENSMUST00000057019	Aplnr	protein_coding	0.39656	0.496152	0.683065	0.290657
ENSMUST00000115835	Grin2a	protein_coding	0.360397	0.535818	0.314041	0.816112
ENSMUST00000115839	Abat	protein_coding	0.198563	0.803173	0.354813	0.795985
ENSMUST00000171001	Dhrs3	protein_coding	0.709118	0.000773066	0.750252	0.00034464
ENSMUST00000057421	Rhno1	protein_coding	-0.498383	0.338555	-0.635788	0.379899
ENSMUST00000139421	Magt1	protein_coding	-0.583062	0.307035	-0.754393	0.790963
ENSMUST00000062067	Lamtor4	protein_coding	-0.0286266	0.937584	-0.040599	0.932394
ENSMUST00000139425	Srrm4	protein_coding	1.24099	2.29855e-05	1.26053	0.00193041
ENSMUST00000062069	Ptgs1	protein_coding	0.283393	0.0731811	0.289029	0.143658
ENSMUST00000117754	Fgfr2	protein_coding	0.0708243	0.933721	0.582226	0.96549
ENSMUST00000139428	Tmem62	protein_coding	-0.11036	0.919925	-1.1891	0.901308
ENSMUST00000180037	Birc6	protein_coding	-0.187558	0.692915	-0.119036	0.971763
ENSMUST00000180036	Oaz1	protein_coding	0.743731	3.68963e-08	0.755796	9.05962e-07
ENSMUST00000165922	E2f5	protein_coding	1.22852	0.0278112	1.25224	0.71597
ENSMUST00000096386	Rnf41	protein_coding	0.16918	0.189251	0.163579	0.300985
ENSMUST00000096385	Mroh1	protein_coding	0.36208	0.0242848	0.398618	0.0314118
ENSMUST00000101254	Ccdc142	protein_coding	-1.28017	0.000308958	-1.48051	0.00307328
ENSMUST00000117757	Gapdh	protein_coding	0.310505	0.012932	0.307868	0.0261278
ENSMUST00000101253	Gm42688	protein_coding	-0.870932	1.40019e-08	-0.901749	2.45852e-07
ENSMUST00000101250	Phykpl	protein_coding	0.125825	0.800102	0.11651	0.849535
ENSMUST00000117577	Btbd10	protein_coding	1.5241	2.98597e-20	1.57235	5.22879e-16
ENSMUST00000039861	Cd33	protein_coding	0.416471	0.619992	1.00878	0.666824
ENSMUST00000108910	Scn8a	protein_coding	-0.230964	0.0108481	-0.232945	0.0703288
ENSMUST00000039867	Zbtb41	protein_coding	0.25229	0.080307	0.246289	0.0960568
ENSMUST00000107723	Grwd1	protein_coding	0.115505	0.684893	0.0966231	0.794898
ENSMUST00000207901	Zfp524	protein_coding	-0.314912	0.715044	-0.151359	0.953324
ENSMUST00000137906	Arid5a	protein_coding	2.06982	6.40945e-20	2.12823	1.01566e-15
ENSMUST00000192287	Pcdh7	protein_coding	0.601633	0.427523	0.841132	0.923244
ENSMUST00000206893	Fbxl19	protein_coding	0.0402329	0.908018	0.0468783	0.924894
ENSMUST00000088313	Emd	protein_coding	1.7453	3.34769e-05	2.2949	8.40819e-05
ENSMUST00000151249	Ndufaf4	protein_coding	-0.219774	0.750083	-0.230539	0.845185
ENSMUST00000088310	Phf3	protein_coding	-0.107296	0.783268	-0.0782494	0.926628
ENSMUST00000151244	Zbtb20	protein_coding	0.422094	0.579291	0.583557	0.692306
ENSMUST00000151246	Fbxo44	protein_coding	-0.31522	0.71874	-0.445313	0.85934
ENSMUST00000166163	Jakmip3	protein_coding	-0.633093	0.0361193	-0.707301	0.0491306
ENSMUST00000151243	Hfe	protein_coding	-0.0627169	0.915444	-0.0461615	0.947018
ENSMUST00000151285	Wapl	protein_coding	0.26139	0.711178	0.143322	0.944681
ENSMUST00000098763	Cttnbp2nl	protein_coding	0.228973	0.0901017	0.232797	0.203148
ENSMUST00000058230	Ensa	protein_coding	-0.0815531	0.685085	-0.099257	0.669259
ENSMUST00000098761	Kcnd3	protein_coding	-0.132094	0.192366	-0.137204	0.381997
ENSMUST00000058232	Xpa	protein_coding	0.825015	0.161873	1.40687	0.241956
ENSMUST00000090558	Celsr2	protein_coding	-0.410843	1.47469e-11	-0.414319	7.69737e-05
ENSMUST00000090559	Cry2	protein_coding	1.08311	4.71943e-10	1.10076	9.39226e-06
ENSMUST00000058237	Ugt1a7c	protein_coding	0.200832	0.804436	0.161501	0.929006
ENSMUST00000090554	Trp53i11	protein_coding	-0.170394	0.276587	-0.177377	0.29963
ENSMUST00000098768	AI593442	protein_coding	-0.899968	3.44869e-13	-0.911092	4.89795e-11
ENSMUST00000050958	Tmie	protein_coding	0.0872567	0.882263	0.0531021	0.946748
ENSMUST00000090553	Sars	protein_coding	-0.0107677	0.968136	-0.0176134	0.967896
ENSMUST00000037198	Osgin2	protein_coding	0.953737	7.66554e-13	0.966597	7.78481e-15
ENSMUST00000110718	Ankrd61	protein_coding	-0.543763	0.346894	-0.574177	0.584984
ENSMUST00000110711	Snap23	protein_coding	0.193218	0.35629	0.201808	0.621156
ENSMUST00000110713	Eapp	protein_coding	-0.264771	0.695714	-0.331569	0.92771
ENSMUST00000178573	Wdr53	protein_coding	-0.273396	0.438459	-0.240872	0.572336
ENSMUST00000056053	Setd1b	protein_coding	-1.42307	0.00290095	-1.98423	0.414463
ENSMUST00000056051	Car7	protein_coding	-0.548918	0.116868	-0.610929	0.148315
ENSMUST00000056050	Pdp1	protein_coding	0.90696	0.17653	6.58284	0.0330863
ENSMUST00000154148	Gm37240	protein_coding	-0.328852	0.669851	-0.0470504	0.987777
ENSMUST00000154149	Dennd2a	protein_coding	-0.0368778	0.959519	-0.0659687	0.954503
ENSMUST00000098495	Snap91	protein_coding	0.0779831	0.831768	0.101682	0.83494
ENSMUST00000098496	Erich3	protein_coding	-0.282521	0.172982	-0.293983	0.213482
ENSMUST00000207278	Med25	protein_coding	0.18949	0.304251	0.186173	0.47512
ENSMUST00000207274	Gabra1	protein_coding	-0.112438	0.896055	-4.23506	0.389895
ENSMUST00000207272	Cdkl3	protein_coding	0.131869	0.897157	-0.0838659	0.971005
ENSMUST00000207270	Lyrm1	protein_coding	0.242475	0.343296	0.244924	0.312031
ENSMUST00000183070	Nktr	protein_coding	0.29523	0.0917448	0.287274	0.0908078
ENSMUST00000120080	Adcy9	protein_coding	-0.0969162	0.655933	-0.104047	0.720617
ENSMUST00000211368	Pde2a	protein_coding	0.238598	0.381544	0.22077	0.730365
ENSMUST00000211369	Chmp2a	protein_coding	0.750731	0.277832	1.26713	0.32448
ENSMUST00000114001	Itsn1	protein_coding	0.611995	0.268638	0.871167	0.622297
ENSMUST00000114003	Cacfd1	protein_coding	-0.174164	0.835574	-0.23619	0.877497
ENSMUST00000166472	BC052040	protein_coding	0.00808023	0.993364	-0.118438	0.970437
ENSMUST00000114005	Cacfd1	protein_coding	0.0179006	0.974168	0.0654948	0.928987
ENSMUST00000114004	Cacfd1	protein_coding	-0.381762	0.0604507	-0.411088	0.0438664
ENSMUST00000114007	Cacfd1	protein_coding	-0.173399	0.426925	-0.178007	0.470473
ENSMUST00000114006	Cacfd1	protein_coding	0.230905	0.781948	1.97521	0.830318
ENSMUST00000136743	Map2k2	protein_coding	-0.0559024	0.961716	2.15138	0.550957
ENSMUST00000136740	Myo9a	protein_coding	-0.0574955	0.716419	-0.0623267	0.851724
ENSMUST00000066804	Sirt5	protein_coding	-0.303229	0.105682	-0.321518	0.154636
ENSMUST00000169324	Pogk	protein_coding	0.283551	0.191672	0.290272	0.276625
ENSMUST00000165680	Gm17509	protein_coding	-0.416599	0.359355	-0.517081	0.169387
ENSMUST00000144099	Cdk5rap2	protein_coding	0.0766022	0.754395	0.073682	0.824713
ENSMUST00000145944	Podxl2	protein_coding	0.192887	0.393359	0.167234	0.631896
ENSMUST00000173696	Kpna1	protein_coding	1.24225	2.07046e-05	1.43205	0.000182417
ENSMUST00000149232	Nde1	protein_coding	-0.276511	0.56885	-0.325071	0.617075
ENSMUST00000068167	Lrrfip1	protein_coding	0.0144073	0.979916	0.00567437	0.996856
ENSMUST00000057907	Fbxo44	protein_coding	0.0958499	0.777666	0.0786111	0.875344
ENSMUST00000193669	Tsga10	protein_coding	0.954579	0.000876894	0.92761	0.279479
ENSMUST00000068168	Kansl1l	protein_coding	0.990839	1.10747e-05	1.03425	0.000519801
ENSMUST00000155230	Fam149a	protein_coding	0.36458	0.103272	0.358082	0.0891522
ENSMUST00000055506	Gtf3c1	protein_coding	-0.176364	0.165257	-0.182139	0.177613
ENSMUST00000155237	Strbp	protein_coding	0.294021	0.450703	0.345019	0.520183
ENSMUST00000019708	Arid3a	protein_coding	-0.782735	0.00131841	-0.82201	0.00692139
ENSMUST00000067801	Cbs	protein_coding	0.142424	0.634391	0.154085	0.660767
ENSMUST00000182304	Rbm5	protein_coding	-0.79587	0.0615325	-1.20952	0.145936
ENSMUST00000182309	Rsrc2	protein_coding	-0.02228	0.948184	-0.0323516	0.946039
ENSMUST00000103031	Fbf1	protein_coding	0.000248736	0.999027	0.0169666	0.981395
ENSMUST00000015858	Cers2	protein_coding	0.00358881	0.985948	0.0045845	0.990152
ENSMUST00000207858	Arhgap33	protein_coding	-0.0730325	0.860922	-0.0524897	0.95809
ENSMUST00000103032	Llgl2	protein_coding	-0.227187	0.771656	-0.371404	0.70299
ENSMUST00000103033	Tmem94	protein_coding	0.229263	0.412585	0.265436	0.70157
ENSMUST00000207856	Gm29797	protein_coding	0.263844	0.736179	0.423715	0.721482
ENSMUST00000015855	Prune	protein_coding	-0.366093	0.00347575	-0.377132	0.0139284
ENSMUST00000068783	Gm9881	protein_coding	0.0717539	0.934449	0.239051	0.838826
ENSMUST00000143472	Capn7	protein_coding	-0.730216	0.0223853	-0.849304	0.0388292
ENSMUST00000043604	Gna11	protein_coding	-0.108885	0.528554	-0.12142	0.522125
ENSMUST00000043605	Kif27	protein_coding	-0.432426	0.150675	-0.470696	0.0829037
ENSMUST00000112871	Cxcl12	protein_coding	-0.0911364	0.906363	-3.38178	0.699333
ENSMUST00000112877	Nr6a1	protein_coding	-0.572494	0.10045	-0.776037	0.259692
ENSMUST00000112874	Nck1	protein_coding	-0.265372	0.220054	-0.303097	0.118013
ENSMUST00000051087	Nrep	protein_coding	0.137127	0.658176	0.165743	0.760216
ENSMUST00000174366	Dhx16	protein_coding	-0.0481534	0.966435	-1.16378	0.897961
ENSMUST00000147540	Trp53bp1	protein_coding	0.198653	0.20261	0.200492	0.218125
ENSMUST00000097352	Pknox1	protein_coding	0.152098	0.40017	0.156545	0.612454
ENSMUST00000147545	Ccdc6	protein_coding	-0.0627405	0.682263	-0.0671488	0.777273
ENSMUST00000115068	Slc37a2	protein_coding	0.21587	0.579291	0.222134	0.709913
ENSMUST00000163486	Naa16	protein_coding	-0.765914	0.10736	-1.06323	0.0534471
ENSMUST00000139487	Wnk4	protein_coding	0.0795802	0.941606	0.196879	0.963214
ENSMUST00000093142	Rasgef1c	protein_coding	-0.0816468	0.897432	-0.162131	0.801448
ENSMUST00000093140	Anapc11	protein_coding	0.238169	0.174264	0.240685	0.166132
ENSMUST00000011398	Thg1l	protein_coding	0.102228	0.753519	0.118356	0.738474
ENSMUST00000065408	Ly6c1	protein_coding	0.320705	0.272717	0.352474	0.433727
ENSMUST00000069782	9030617O03Rik	protein_coding	-0.523002	0.0334417	-0.533895	0.110305
ENSMUST00000048393	Atg101	protein_coding	1.66331	7.17892e-13	1.7318	2.59264e-06
ENSMUST00000057410	Fbln1	protein_coding	-1.06021	5.80331e-07	-1.08859	6.73763e-07
ENSMUST00000048391	Clspn	protein_coding	-1.72691	4.66844e-05	-2.14318	0.000154804
ENSMUST00000194392	Mrpl41	protein_coding	-0.440786	0.335296	-0.490542	0.223544
ENSMUST00000198834	Fbrsl1	protein_coding	0.431992	0.0477747	0.426591	0.0948984
ENSMUST00000166980	Ddr1	protein_coding	2.26989	2.03877e-11	4.02517	0.0291552
ENSMUST00000163483	Rab1a	protein_coding	0.24311	0.659775	0.00683545	0.99714
ENSMUST00000166984	Fubp1	protein_coding	0.18485	0.295525	0.18738	0.408122
ENSMUST00000146634	Ctu2	protein_coding	0.675206	0.188903	1.06252	0.202925
ENSMUST00000146637	Sbf1	protein_coding	0.0639885	0.936588	-0.0940593	0.952349
ENSMUST00000079764	Wdr83os	protein_coding	0.174619	0.343969	0.179706	0.379936
ENSMUST00000014812	Chfr	protein_coding	0.61937	0.17067	0.478966	0.790392
ENSMUST00000142701	Brap	protein_coding	0.531965	0.0576099	0.537917	0.023886
ENSMUST00000142704	Acsl3	protein_coding	0.322567	0.0135563	0.323802	0.0168258
ENSMUST00000074969	Cage1	protein_coding	0.249359	0.801516	1.21771	0.765397
ENSMUST00000142706	Polr1c	protein_coding	1.13065	0.0606529	1.87063	0.226838
ENSMUST00000195620	Sema4c	protein_coding	1.71993	0.000738761	2.71256	0.246581
ENSMUST00000074963	Bbs5	protein_coding	-0.138936	0.421884	-0.14923	0.59941
ENSMUST00000020307	Anapc16	protein_coding	0.0933379	0.850746	0.0376771	0.971005
ENSMUST00000114823	Mkrn1	protein_coding	0.215254	0.662603	0.201479	0.814802
ENSMUST00000114822	Mkrn1	protein_coding	0.774356	0.00195365	0.753937	0.00776091
ENSMUST00000114821	C1qtnf5	protein_coding	0.482212	0.18653	0.533536	0.239179
ENSMUST00000153306	Usp5	protein_coding	0.241441	0.761623	-0.00589832	0.997822
ENSMUST00000050067	Hectd3	protein_coding	-0.297757	0.00323354	-0.305825	0.0181596
ENSMUST00000105032	Fam43b	protein_coding	-0.655667	5.32186e-05	-0.661376	1.13724e-05
ENSMUST00000120289	Pfn2	protein_coding	0.385866	0.254955	0.411135	0.459551
ENSMUST00000156159	Sptbn5	protein_coding	0.339049	0.554288	0.370411	0.601571
ENSMUST00000156158	Trafd1	protein_coding	-0.145307	0.628792	-0.138512	0.698768
ENSMUST00000120286	Cmc4	protein_coding	-0.49448	0.29446	-0.502296	0.293118
ENSMUST00000152233	Ankzf1	protein_coding	-0.373662	0.154815	-0.413229	0.166749
ENSMUST00000050069	Rbm12b1	protein_coding	-0.268802	0.460327	-0.275487	0.648047
ENSMUST00000164859	Senp6	protein_coding	0.093799	0.655933	0.0990954	0.781275
ENSMUST00000164853	Ccdc24	protein_coding	-0.0780104	0.934103	0.0944963	0.952618
ENSMUST00000164855	A730015C16Rik	protein_coding	1.21687	0.00668648	1.44753	0.00427009
ENSMUST00000212129	Rpl18a	protein_coding	0.394626	0.0780517	0.386292	0.222422
ENSMUST00000121484	Helz2	protein_coding	1.37765	0.000632486	1.59068	0.744207
ENSMUST00000121489	P2rx7	protein_coding	-0.292596	0.758474	-1.79162	0.750458
ENSMUST00000212124	Polr2c	protein_coding	0.993353	0.143801	1.47181	0.723278
ENSMUST00000212121	Eps15l1	protein_coding	-0.137999	0.615502	-0.153022	0.724872
ENSMUST00000127889	B9d1	protein_coding	-0.946999	0.11027	-1.51581	0.159602
ENSMUST00000201984	Ube2k	protein_coding	0.555406	0.319242	0.551115	0.689084
ENSMUST00000127886	Frem1	protein_coding	0.255242	0.770012	0.789877	0.578924
ENSMUST00000122063	Ift88	protein_coding	-0.217045	0.148136	-0.222536	0.281392
ENSMUST00000105780	Fhad1	protein_coding	0.574288	0.224106	0.585726	0.480432
ENSMUST00000105782	Rsc1a1	protein_coding	-0.205461	0.481312	-0.237638	0.568831
ENSMUST00000105784	Fblim1	protein_coding	0.0504425	0.940292	0.103775	0.975784
ENSMUST00000105786	Spen	protein_coding	0.391462	0.0521521	0.368664	0.433049
ENSMUST00000105388	Agpat3	protein_coding	0.039193	0.968347	1.358	0.908929
ENSMUST00000122066	Zfp629	protein_coding	-0.879003	0.023394	-1.11288	0.0674174
ENSMUST00000001675	Stk38l	protein_coding	1.67419	5.09238e-25	1.70742	7.74731e-17
ENSMUST00000077433	Theg	protein_coding	0.644755	0.362155	1.04298	0.690356
ENSMUST00000121739	Kdm2b	protein_coding	-0.24962	0.308157	-0.269026	0.549348
ENSMUST00000121738	Srr	protein_coding	-0.07968	0.565462	-0.0882175	0.717392
ENSMUST00000121733	Papln	protein_coding	-0.0979721	0.928698	-0.119443	0.978303
ENSMUST00000045644	Actr5	protein_coding	-0.228795	0.516919	-0.286983	0.451264
ENSMUST00000122065	Cgnl1	protein_coding	0.0603097	0.947241	-0.0177985	0.993982
ENSMUST00000162185	Lmo3	protein_coding	-0.975867	0.0805529	-1.28118	0.163303
ENSMUST00000150655	Naa60	protein_coding	-0.14578	0.705273	-0.162719	0.777862
ENSMUST00000150650	Gm14325	protein_coding	-0.232334	0.395449	-0.237219	0.488549
ENSMUST00000162183	Alg12	protein_coding	-0.557715	0.00383033	-0.572566	0.00817638
ENSMUST00000127775	4931428L18Rik	protein_coding	-0.406234	0.281596	-0.470808	0.14719
ENSMUST00000022916	Lrp12	protein_coding	0.249954	0.000830082	0.249698	0.051242
ENSMUST00000162188	Phf21a	protein_coding	-0.0870553	0.929291	-0.0477945	0.988194
ENSMUST00000075363	Acot7	protein_coding	0.0968219	0.60178	0.0949667	0.690485
ENSMUST00000131968	Dohh	protein_coding	-0.364813	0.550188	-0.396956	0.701425
ENSMUST00000131966	Ccdc81	protein_coding	-0.120549	0.88546	-0.25333	0.801617
ENSMUST00000002327	Def6	protein_coding	0.217336	0.642467	0.241674	0.674306
ENSMUST00000002320	Ppard	protein_coding	1.46363	1.03058e-27	1.47145	3.23959e-29
ENSMUST00000203162	Clec1a	protein_coding	-0.807893	0.0011102	-0.866214	0.000147239
ENSMUST00000073456	Nsa2	protein_coding	-0.142975	0.353926	-0.155812	0.33698
ENSMUST00000095254	Tom1l2	protein_coding	-0.0662981	0.726816	-0.0744433	0.745159
ENSMUST00000159939	Phf21b	protein_coding	2.9179	1.64279e-19	3.32955	3.34445e-08
ENSMUST00000087933	Tpp2	protein_coding	0.530763	0.0509864	0.608094	0.0922574
ENSMUST00000144148	Wdr45	protein_coding	0.377264	0.663107	0.461311	0.892526
ENSMUST00000159936	Luc7l2	protein_coding	0.323227	0.0173112	0.312368	0.0186283
ENSMUST00000095259	Gtpbp3	protein_coding	-0.209017	0.265623	-0.212717	0.433402
ENSMUST00000087938	Rtkn	protein_coding	0.0176117	0.981797	-0.0456005	0.973703
ENSMUST00000039152	Dhx8	protein_coding	-0.05589	0.695214	-0.0607067	0.819167
ENSMUST00000025823	Rce1	protein_coding	0.193693	0.278667	0.187436	0.420654
ENSMUST00000025826	Slc29a2	protein_coding	-0.626102	3.40937e-05	-0.646898	8.91283e-05
ENSMUST00000025827	Minpp1	protein_coding	0.319203	0.113293	0.318894	0.265762
ENSMUST00000203295	Plk4	protein_coding	0.166474	0.851561	1.69383	0.869532
ENSMUST00000163854	Map4k4	protein_coding	0.128099	0.40052	0.131713	0.524954
ENSMUST00000163858	Ankrd13d	protein_coding	-0.0677892	0.899327	-0.163344	0.828347
ENSMUST00000061280	Pcmtd1	protein_coding	-0.0627291	0.723543	-0.0630156	0.779819
ENSMUST00000206669	Ube2s	protein_coding	0.464892	0.307136	0.561788	0.873183
ENSMUST00000185168	1190007I07Rik	protein_coding	0.0294482	0.979849	0.167449	0.952592
ENSMUST00000161980	Etv1	protein_coding	0.350746	0.688756	0.23971	0.970629
ENSMUST00000161986	Gnpat	protein_coding	0.434213	0.490967	0.57882	0.72841
ENSMUST00000161987	Apaf1	protein_coding	0.139724	0.805945	0.0634654	0.932211
ENSMUST00000159687	Psme2	protein_coding	-0.0889873	0.935423	-0.13095	0.976218
ENSMUST00000143961	Tcp1	protein_coding	0.197608	0.519952	0.18471	0.644071
ENSMUST00000159683	Yars2	protein_coding	-0.358043	0.64289	-3.64175	0.52088
ENSMUST00000042692	Tcp11	protein_coding	0.117798	0.903005	0.192026	0.954558
ENSMUST00000132435	Tmcc2	protein_coding	-1.0865	8.36754e-11	-1.12611	1.79004e-08
ENSMUST00000132437	Taz	protein_coding	0.139468	0.896419	0.014546	0.997045
ENSMUST00000132430	Cep164	protein_coding	-0.301288	0.441108	-0.364732	0.294785
ENSMUST00000042699	Aldh8a1	protein_coding	0.40928	0.462161	0.530712	0.488549
ENSMUST00000178353	Gm21992	protein_coding	0.653211	0.0753007	0.669959	0.170168
ENSMUST00000008004	Ddx49	protein_coding	-0.0831187	0.659545	-0.0937706	0.727897
ENSMUST00000078528	C1qbp	protein_coding	-0.234339	0.0354472	-0.243811	0.0981645
ENSMUST00000043349	Grid1	protein_coding	-0.232965	0.0233817	-0.238172	0.0748497
ENSMUST00000043342	Dph5	protein_coding	-0.776453	0.0186998	-0.886137	0.00465711
ENSMUST00000123256	Mmab	protein_coding	-0.28779	0.677555	-0.268943	0.823822
ENSMUST00000085420	Car12	protein_coding	-0.164465	0.341233	-0.169767	0.382092
ENSMUST00000085774	Sdk1	protein_coding	0.118286	0.745017	0.156119	0.74575
ENSMUST00000105387	Agpat3	protein_coding	0.353125	0.106844	0.315652	0.248662
ENSMUST00000085425	Isg15	protein_coding	-0.129007	0.792048	-0.159741	0.778888
ENSMUST00000149243	Mrpl3	protein_coding	-0.100015	0.75829	-0.116915	0.757048
ENSMUST00000007207	Clcn2	protein_coding	-0.0129144	0.960754	-0.0171419	0.961747
ENSMUST00000188307	Nfasc	protein_coding	-0.0521369	0.931853	-0.139209	0.853293
ENSMUST00000188302	Tpp2	protein_coding	1.79512	0.000222873	2.22533	0.473888
ENSMUST00000044691	Bag2	protein_coding	-0.230953	0.372454	-0.244893	0.361477
ENSMUST00000208117	Josd2	protein_coding	-0.115545	0.89314	0.0106031	0.996766
ENSMUST00000203830	Chl1	protein_coding	-0.186849	0.847604	-0.720971	0.74522
ENSMUST00000105381	Bsg	protein_coding	0.324521	0.13822	0.356681	0.213622
ENSMUST00000089215	Cntn6	protein_coding	-0.237504	0.666028	-0.389831	0.82096
ENSMUST00000201471	Trpv6	protein_coding	0.0837584	0.871041	0.0438598	0.947595
ENSMUST00000209244	Pkhd1l1	protein_coding	-0.0648678	0.956311	-1.52035	0.839982
ENSMUST00000209245	Cyth2	protein_coding	0.0520905	0.877869	0.0799344	0.92825
ENSMUST00000022881	Fam134b	protein_coding	-0.0462537	0.793223	-0.0500309	0.864402
ENSMUST00000026703	Bach1	protein_coding	0.831704	1.93073e-11	0.838515	1.48727e-11
ENSMUST00000026704	Cct8	protein_coding	0.141791	0.321699	0.136436	0.398038
ENSMUST00000159073	Gng2	protein_coding	0.268699	0.650271	0.254252	0.7392
ENSMUST00000209248	Rnf223	protein_coding	-0.414631	0.367063	-0.507084	0.267557
ENSMUST00000081423	Nol4	protein_coding	-0.0276602	0.918308	-0.0273217	0.963021
ENSMUST00000134876	Stx16	protein_coding	-1.06813	0.0732606	-1.49972	0.216064
ENSMUST00000113878	Arhgef9	protein_coding	0.0535741	0.883036	0.083122	0.88008
ENSMUST00000108660	Cyb5d1	protein_coding	-0.0688227	0.794958	-0.0686637	0.868745
ENSMUST00000160762	Cpsf4	protein_coding	-0.223294	0.706165	-0.308426	0.70282
ENSMUST00000211846	Golga4	protein_coding	0.164838	0.732051	0.146082	0.788227
ENSMUST00000164079	Taf1d	protein_coding	-0.114401	0.631045	-0.126461	0.726253
ENSMUST00000077983	Sdccag3	protein_coding	0.244397	0.0180862	0.244921	0.118542
ENSMUST00000164076	Bean1	protein_coding	0.273378	0.774724	2.93204	0.483816
ENSMUST00000133474	Ndufv1	protein_coding	0.130521	0.857957	0.00868335	0.995282
ENSMUST00000038569	Spry1	protein_coding	-0.181148	0.76245	-0.22452	0.826253
ENSMUST00000143284	Nr3c2	protein_coding	-0.0953261	0.907922	-0.0277308	0.984263
ENSMUST00000165280	Bmpr1a	protein_coding	-0.127282	0.86498	-3.85277	0.611087
ENSMUST00000106549	Knop1	protein_coding	-0.174218	0.841966	-0.167699	0.927964
ENSMUST00000179030	Ankrd44	protein_coding	0.0233651	0.949419	-0.0164587	0.986694
ENSMUST00000106545	Cyp4x1	protein_coding	0.172918	0.448121	0.174225	0.539742
ENSMUST00000106542	Hid1	protein_coding	-0.0895538	0.571881	-0.106229	0.790893
ENSMUST00000106540	Amy1	protein_coding	0.215334	0.268588	0.209674	0.28908
ENSMUST00000044521	Ahdc1	protein_coding	-0.523018	0.409219	-0.957139	0.621454
ENSMUST00000040865	Tmem98	protein_coding	0.360422	0.180866	0.428786	0.102601
ENSMUST00000020954	Trappc12	protein_coding	-0.267801	0.0850832	-0.263002	0.265364
ENSMUST00000108703	Trim16	protein_coding	0.675771	0.313761	4.93869	0.220444
ENSMUST00000020959	Rnaseh1	protein_coding	-0.812778	6.53541e-07	-0.834487	6.46441e-06
ENSMUST00000020958	Klhl29	protein_coding	0.0603055	0.698524	0.0543555	0.827805
ENSMUST00000023289	Chkb	protein_coding	0.308745	0.0496297	0.297101	0.10746
ENSMUST00000061772	Rbm15	protein_coding	1.55756	7.81163e-47	1.56789	1.39748e-44
ENSMUST00000070458	Lrrc56	protein_coding	-0.188626	0.833509	-0.396783	0.924454
ENSMUST00000023283	Lmf2	protein_coding	0.0913941	0.723152	0.0958128	0.779544
ENSMUST00000027071	Lactb2	protein_coding	-0.224973	0.0806053	-0.236169	0.16524
ENSMUST00000023756	Racgap1	protein_coding	-0.238187	0.668302	-0.319982	0.836409
ENSMUST00000023758	Asic1	protein_coding	-0.386616	7.75201e-05	-0.393333	0.00415862
ENSMUST00000023759	Smarcd1	protein_coding	-0.278451	0.0012709	-0.284571	0.0196768
ENSMUST00000064821	Itgam	protein_coding	-0.0719699	0.893034	-0.221567	0.747766
ENSMUST00000107176	Etv4	protein_coding	0.266827	0.502206	0.543335	0.429569
ENSMUST00000124517	Plch2	protein_coding	-0.344246	0.441294	-0.491042	0.620984
ENSMUST00000107171	Setdb1	protein_coding	-0.572853	0.198551	-0.758282	0.345521
ENSMUST00000107170	Setdb1	protein_coding	-0.591627	4.82117e-07	-0.595793	1.17609e-05
ENSMUST00000020485	Glt8d2	protein_coding	-0.755253	0.00250761	-0.813167	0.00462462
ENSMUST00000020484	Txnrd1	protein_coding	0.534055	2.88106e-12	0.530125	4.16632e-07
ENSMUST00000171249	Nudt17	protein_coding	0.0406977	0.935638	0.00915029	0.990543
ENSMUST00000020488	D10Wsu102e	protein_coding	0.210249	0.253932	0.204747	0.45934
ENSMUST00000171244	Myg1	protein_coding	-0.0720853	0.951544	-1.8372	0.78411
ENSMUST00000171245	Prr13	protein_coding	-0.380018	0.341214	-0.384423	0.607408
ENSMUST00000134293	Ehbp1	protein_coding	0.72335	0.155478	1.10188	0.261863
ENSMUST00000059305	Snrpn	protein_coding	0.224274	0.166399	0.216296	0.318309
ENSMUST00000185533	Nudt16	protein_coding	-0.0346761	0.959659	-0.095972	0.909325
ENSMUST00000176467	Gm4070	protein_coding	0.643799	0.338232	4.95338	0.241018
ENSMUST00000185531	Lrrfip1	protein_coding	-0.0129172	0.983154	0.0616247	0.96195
ENSMUST00000108700	Pmp22	protein_coding	0.675991	0.0265583	0.722853	0.0916017
ENSMUST00000037912	Ssh2	protein_coding	0.167118	0.066712	0.16653	0.287062
ENSMUST00000072587	Mrps21	protein_coding	2.54242	3.84851e-06	5.64039	0.0554268
ENSMUST00000185539	Uchl5	protein_coding	0.225341	0.642315	0.325293	0.562078
ENSMUST00000101017	Ndel1	protein_coding	0.672181	0.0180493	0.655316	0.179961
ENSMUST00000177370	Ctage5	protein_coding	-0.0954823	0.898787	-0.166402	0.891915
ENSMUST00000037918	Tmem33	protein_coding	-0.266797	0.0495976	-0.264292	0.149671
ENSMUST00000212773	Dpep1	protein_coding	-0.147254	0.86683	-0.243932	0.850886
ENSMUST00000156616	Huwe1	protein_coding	-0.0407211	0.956946	-0.0386366	0.973197
ENSMUST00000066208	Aldh7a1	protein_coding	0.204604	0.0547612	0.205503	0.248141
ENSMUST00000165842	Pex11b	protein_coding	-0.473994	0.00511568	-0.49035	0.00296528
ENSMUST00000174548	Hnrnpl	protein_coding	0.140244	0.827003	0.0627896	0.958836
ENSMUST00000171794	Gtf2ird1	protein_coding	0.421937	0.345204	0.665364	0.710316
ENSMUST00000165848	Zscan4d	protein_coding	-0.0945996	0.917852	-0.23324	0.869599
ENSMUST00000171796	Kif1a	protein_coding	0.263458	0.000735189	0.261666	0.0390801
ENSMUST00000171797	Nap1l1	protein_coding	0.409022	1.5315e-05	0.409083	0.000161386
ENSMUST00000171791	Mast4	protein_coding	2.97398	3.86079e-166	3.02734	1.0399e-98
ENSMUST00000022680	Bin3	protein_coding	-0.0416193	0.890816	-0.0436873	0.920644
ENSMUST00000134127	Ctu2	protein_coding	0.513509	0.144559	0.492423	0.282871
ENSMUST00000139743	Fam229b	protein_coding	0.448173	0.426188	0.436147	0.750923
ENSMUST00000139742	Rhbdd3	protein_coding	0.0016791	0.997869	-0.114834	0.917958
ENSMUST00000173793	Nnat	protein_coding	1.21229	9.83528e-06	1.262	1.81275e-06
ENSMUST00000173790	H2afz	protein_coding	1.73125	1.45242e-09	1.93527	4.33966e-07
ENSMUST00000033749	Pir	protein_coding	0.254055	0.403459	0.256822	0.512196
ENSMUST00000033744	Atp2b3	protein_coding	-0.249495	0.387704	-0.279266	0.454303
ENSMUST00000021536	Atp6v1d	protein_coding	0.0985347	0.642912	0.0885799	0.781053
ENSMUST00000033740	Zfp92	protein_coding	-0.103345	0.831083	-0.142309	0.822972
ENSMUST00000033741	Bgn	protein_coding	0.269537	0.386854	0.316545	0.415317
ENSMUST00000177084	Trmt1	protein_coding	0.145394	0.866683	0.0847281	0.96132
ENSMUST00000177083	Asap1	protein_coding	0.769529	0.0424097	0.687263	0.830616
ENSMUST00000135455	Pop5	protein_coding	0.516857	0.276307	0.547887	0.476093
ENSMUST00000135454	0610037L13Rik	protein_coding	0.0798193	0.900182	0.116778	0.878429
ENSMUST00000172264	Mast4	protein_coding	0.797855	0.0887229	1.19387	0.265432
ENSMUST00000060918	Amz1	protein_coding	-0.0580636	0.884076	-0.0639806	0.915953
ENSMUST00000108705	Zfp286	protein_coding	-0.912355	5.67705e-05	-0.96246	6.02151e-06
ENSMUST00000053020	Neurl1b	protein_coding	-0.613081	1.8597e-07	-0.625932	2.70669e-08
ENSMUST00000105863	Tmem50a	protein_coding	-0.169104	0.795964	-0.199273	0.851176
ENSMUST00000079605	Zfp462	protein_coding	-0.262006	0.453582	-0.248867	0.692245
ENSMUST00000020220	Nuak1	protein_coding	-0.644015	4.59582e-11	-0.658603	7.84778e-09
ENSMUST00000186949	Bzw1	protein_coding	1.35884	2.61844e-12	1.50388	1.93822e-09
ENSMUST00000105646	Ajap1	protein_coding	-0.278213	0.0922429	-0.29462	0.0636988
ENSMUST00000079601	Etv5	protein_coding	1.10096	6.79858e-21	1.11298	1.10054e-21
ENSMUST00000196423	Anapc5	protein_coding	-0.739217	0.000123444	-0.772189	0.00434797
ENSMUST00000131518	Lrrc40	protein_coding	-0.0400436	0.959384	-0.128344	0.916101
ENSMUST00000062451	Muc6	protein_coding	0.172448	0.855946	1.4618	0.799958
ENSMUST00000135986	Ccdc13	protein_coding	0.173957	0.549844	0.184639	0.598912
ENSMUST00000154301	Spaca6	protein_coding	0.131658	0.820435	0.136365	0.849576
ENSMUST00000034909	Rasgrf1	protein_coding	1.19998	1.2903e-05	1.2491	0.0019599
ENSMUST00000135988	Desi1	protein_coding	0.384096	0.0889068	0.381691	0.1953
ENSMUST00000052774	Tyw3	protein_coding	-0.888456	2.83202e-07	-0.915993	3.50253e-07
ENSMUST00000109541	Atp6ap1l	protein_coding	0.221203	0.823897	0.54219	0.855423
ENSMUST00000053792	9030612E09Rik	protein_coding	0.0411111	0.953064	0.0720522	0.934912
ENSMUST00000154232	Brd2	protein_coding	1.40099	1.93978e-13	1.44756	8.97354e-08
ENSMUST00000153597	Whsc1l1	protein_coding	-0.0187399	0.980748	-0.0581482	0.966411
ENSMUST00000183277	Sos2	protein_coding	-0.419424	0.081719	-0.482705	0.0763103
ENSMUST00000183274	Xpnpep1	protein_coding	-0.0942444	0.731596	-0.0984366	0.806208
[truncated: 32,213 more rows]
