# Supplementary material for: Forniceal deep brain stimulation induces gene expression and splicing changes that promote neurogenesis and plasticity
Source: eLife. 2018 Mar 23;7:e34031. doi: 10.7554/eLife.34031 (PMC5906096; doi:10.7554/eLife.34031)
Supplement: Figure 2—source data 2. [file elife-34031-fig2-data2.xlsx]

## Sheet: DEI not DEG GO
ID	Term	Pvalue	FDR	No.ofGenes
GO:0051130	positive regulation of cellular component organization	0.00016901	0.0483825	44
GO:0016310	phosphorylation	0.000114822	0.040696	67
GO:0048468	cell development	5.55e-05	0.0344108	66
GO:0051128	regulation of cellular component organization	6.61e-06	0.00733969	80
GO:0060284	regulation of cell development	0.000127111	0.0411341	35
GO:0031175	neuron projection development	5.41e-05	0.0344108	38
GO:0007270	neuron-neuron synaptic transmission	0.000102119	0.040004	12
GO:0032984	macromolecular complex disassembly	0.00016436	0.0483825	12
GO:0000904	cell morphogenesis involved in differentiation	1.04e-06	0.00386164	36
GO:0000902	cell morphogenesis	6.9e-06	0.00733969	43
GO:0018193	peptidyl-amino acid modification	7.04e-07	0.00386164	49
GO:0032989	cellular component morphogenesis	1.18e-05	0.0109393	45
GO:0010769	regulation of cell morphogenesis involved in differentiation	8.5e-05	0.0395405	18
GO:0044093	positive regulation of molecular function	7.36e-05	0.0391521	57
GO:0048666	neuron development	2.7e-05	0.020133	43
GO:0048667	cell morphogenesis involved in neuron differentiation	1.82e-06	0.00450531	31
GO:0061564	axon development	0.000120791	0.0408658	24
GO:0030182	neuron differentiation	9.84e-05	0.040004	48
GO:0051091	positive regulation of sequence-specific DNA binding transcription factor activity	0.000132904	0.0412168	14
GO:0007409	axonogenesis	9.11e-05	0.0398681	23
GO:0022008	neurogenesis	0.000108118	0.040236	55
GO:0048858	cell projection morphogenesis	5.6e-06	0.00733969	32
GO:0048699	generation of neurons	8.11e-05	0.0395405	52
GO:0032990	cell part morphogenesis	1.32e-05	0.0109393	32
GO:0007399	nervous system development	6.4e-05	0.0366475	74
GO:0048812	neuron projection morphogenesis	2.79e-06	0.00519143	32
GO:0097300	programmed necrotic cell death	0.000176086	0.0485412	6
