# Supplementary material for: Forniceal deep brain stimulation induces gene expression and splicing changes that promote neurogenesis and plasticity
Source: eLife. 2018 Mar 23;7:e34031. doi: 10.7554/eLife.34031 (PMC5906096; doi:10.7554/eLife.34031)
Supplement: Figure 3—source data 1. [file elife-34031-fig3-data1.xlsx]

## Sheet: tc-d472_proteinquant
				Summed Signal to Noise									Normalized % Relative Abundance
				GFP#15-DBS	GFP#17-DBS	TG1#68-DBS	TG1#76-DBS	TG1#81-DBS	TF1#69-Sham	TG1#77-Sham	TG1#78-Sham	TG1#80-Sham	GFP#15-DBS	GFP#17-DBS	TG1#68-DBS	TG1#76-DBS	TG1#81-DBS	TF1#69-Sham	TG1#77-Sham	TG1#78-Sham	TG1#80-Sham
Protein ID (Uniprot)	Gene Symbol	Description	# quantified peptides	126	127C	128C	129C	130C	127N	128N	129N	130N	126	127C	128C	129C	130C	127N	128N	129N	130N
sp|P60710|ACTB_MOUSE	Actb	ACTB_MOUSE Actin, cytoplasmic 1	505	76737	83774.5	74614.2	89716.1	69768.4	69525.8	87001.6	80731.1	76173.3	11.3228	11.1178	10.7032	11.147	11.22	10.8791	11.777	11.0035	10.8296
sp|P16546|SPTN1_MOUSE	Sptan1	SPTN1_MOUSE Spectrin alpha chain, non-erythrocytic 1	454	55086.9	60920	56409.6	64769.1	50225.5	50150.5	58637.3	54583.8	54401.8	11.386	11.3251	11.335	11.2727	11.3144	10.9925	11.1188	10.4214	10.8342
sp|Q62261|SPTB2_MOUSE	Sptbn1	SPTB2_MOUSE Spectrin beta chain, non-erythrocytic 1	390	44713.7	49948.3	48799.1	54538.8	41609.4	43702.7	49813	48389.8	47951	10.8713	10.9226	11.5345	11.1657	11.0261	11.2681	11.1108	10.8677	11.2332
sp|Q6PIC6|AT1A3_MOUSE	Atp1a3	AT1A3_MOUSE Sodium/potassium-transporting ATPase subunit alpha-3	352	48188.7	57531.3	50899.2	59113.6	46624.6	45191.3	56464.9	53100.9	52033.1	10.7344	11.5265	11.0227	11.0881	11.3196	10.6754	11.5391	10.9263	11.1679
sp|P68368|TBA4A_MOUSE	Tuba4a	TBA4A_MOUSE Tubulin alpha-4A chain	306	43664.5	50168.2	39531.8	50224.8	43086.7	40190.4	47073.2	45821.6	43098.6	11.3082	11.6857	9.95313	10.9528	12.1618	11.038	11.1841	10.9617	10.7545
sp|P68372|TBB4B_MOUSE	Tubb4b	TBB4B_MOUSE Tubulin beta-4B chain	299	43437.4	51407.3	49764.3	55451	41129.5	44330.1	44821.8	47835.7	44994.1	10.7188	11.4096	11.9384	11.5221	11.0617	11.6007	10.1469	10.9038	10.698
sp|P16858|G3P_MOUSE	Gapdh	G3P_MOUSE Glyceraldehyde-3-phosphate dehydrogenase	282	39215.7	43160	39892.4	46852.1	30150.8	37691.4	40404.7	37255	37376.6	11.6507	11.5328	11.522	11.7209	9.76288	11.875	11.0125	10.2239	10.6993
sp|Q68FD5|CLH1_MOUSE	Cltc	CLH1_MOUSE Clathrin heavy chain 1	253	34243.4	38711.6	33540.1	40725.9	32292.9	31575.5	33984.7	34975.2	33317.9	11.4057	11.5971	10.8607	11.4224	11.723	11.1531	10.3846	10.7609	10.6926
sp|P56480|ATPB_MOUSE	Atp5b	ATPB_MOUSE ATP synthase subunit beta, mitochondrial	236	21136.4	22717.7	19503.7	23580.1	18206.2	19462.2	21177.8	20127.7	20012.2	11.863	11.468	10.6421	11.1442	11.137	11.5839	10.9045	10.4351	10.8223
sp|O08553|DPYL2_MOUSE	Dpysl2	DPYL2_MOUSE Dihydropyrimidinase-related protein 2	222	24905.5	27519.2	25775.1	29379.8	21979.4	23824.3	27600.8	26223.6	25496.8	11.1791	11.1099	11.2476	11.1046	10.7526	11.3405	11.3657	10.8729	11.0271
sp|Q9QXS1-6|PLEC_MOUSE	Plec	PLEC_MOUSE Isoform PLEC-0,1C of Plectin	218	32348.9	35275.4	32257.2	37285.1	27585.3	31746.8	35532	33772.8	34309.8	11.2551	11.0388	10.9109	10.9235	10.4605	11.7136	11.3415	10.8542	11.5019
sp|P63017|HSP7C_MOUSE	Hspa8	HSP7C_MOUSE Heat shock cognate 71 kDa protein	215	37849.6	41596.4	39413	44330.5	34506.9	34769.6	41112.1	38924.1	37150.9	11.3033	11.1727	11.4427	11.1477	11.2314	11.0114	11.2635	10.7375	10.6899
sp|Q9JHU4|DYHC1_MOUSE	Dync1h1	DYHC1_MOUSE Cytoplasmic dynein 1 heavy chain 1	210	32674.9	36076.8	35928.7	38337.4	29312.2	30433.3	37440.6	35258.3	34476.1	11.0131	10.9367	11.7729	10.8807	10.7679	10.8779	11.5771	10.9774	11.1963
sp|P09411|PGK1_MOUSE	Pgk1	PGK1_MOUSE Phosphoglycerate kinase 1	208	29398.8	32738.9	28384.3	33737.4	26430.3	26851.7	28870	29207.9	27236.9	11.6737	11.6924	10.9573	11.2805	11.4384	11.3071	10.5168	10.7132	10.4207
sp|P20357|MTAP2_MOUSE	Map2	MTAP2_MOUSE Microtubule-associated protein 2	208	29741.9	34145.8	33848.5	36168.6	26765.1	29662.5	37609.7	32989.5	33655.7	10.5525	10.8964	11.6754	10.8058	10.35	11.1607	12.2418	10.8119	11.5055
sp|Q7TMM9|TBB2A_MOUSE	Tubb2a	TBB2A_MOUSE Tubulin beta-2A chain	203	43080	46333.7	45316.2	49840.7	34496.4	40858.7	46059.1	42886.1	41211.6	11.5409	11.164	11.8022	11.2431	10.0722	11.6077	11.3198	10.6126	10.6376
sp|Q03265|ATPA_MOUSE	Atp5a1	ATPA_MOUSE ATP synthase subunit alpha, mitochondrial	201	34163.9	37826.4	31826.8	38762.6	34174	30365.6	36267.3	37048	32117.2	11.4011	11.3536	10.3257	10.8926	12.4297	10.7463	11.1034	11.4205	10.3271
sp|O88935|SYN1_MOUSE	Syn1	SYN1_MOUSE Synapsin-1	193	22538.6	24767.9	22934.6	26333.2	19923.8	20948.6	26417.2	24835.1	23442.2	11.1039	10.9749	10.9846	10.9242	10.6981	10.9447	11.9398	11.302	11.1278
sp|P14873|MAP1B_MOUSE	Map1b	MAP1B_MOUSE Microtubule-associated protein 1B	187	23066.3	25846.1	26053.9	27963.1	21335.4	22781.3	28512.1	27142.8	26428.7	10.5184	10.6005	11.5502	10.7373	10.6037	11.0167	11.9278	11.4332	11.6121
sp|Q8C8R3-4|ANK2_MOUSE	Ank2	ANK2_MOUSE Isoform 4 of Ankyrin-2	184	26594.4	30376.2	30687.1	33279.2	24832.7	25892.4	32505	30447.9	29797.7	10.5136	10.8008	11.7941	11.0784	10.6998	10.8551	11.7889	11.1189	11.3503
sp|P07901|HS90A_MOUSE	Hsp90aa1	HS90A_MOUSE Heat shock protein HSP 90-alpha	176	26491.8	28165.6	26315.5	29971.8	23850.9	23645.8	28046.2	26143.8	25698.5	11.601	11.0934	11.2032	11.0519	11.3835	10.981	11.2673	10.5754	10.8431
sp|O88737|BSN_MOUSE	Bsn	BSN_MOUSE Protein bassoon	172	17882.1	19670.2	21338.2	22233.6	16259.9	17957.1	24401.3	22464	22399.7	10.1301	10.0223	11.7517	10.6059	10.0392	10.7878	12.6815	11.755	12.2264
sp|P50516|VATA_MOUSE	Atp6v1a	VATA_MOUSE V-type proton ATPase catalytic subunit A	163	25895.7	28352.8	24940.2	29441.9	23023	23886.4	27637	26190	25192.7	11.5257	11.35	10.7916	11.0343	11.1683	11.2743	11.2847	10.7675	10.8037
sp|P46460|NSF_MOUSE	Nsf	NSF_MOUSE Vesicle-fusing ATPase	160	20709.3	23240.2	22934.3	26024.2	19102.7	21124.5	23509.6	22975.3	22297.6	10.7125	10.8125	11.5334	11.3356	10.7698	11.5881	11.1566	10.9781	11.1134
sp|Q9QYR6|MAP1A_MOUSE	Map1a	MAP1A_MOUSE Microtubule-associated protein 1A	160	23997.8	27003.2	27534	28994	21363.8	23196.6	31091.5	27555.8	28381	10.4943	10.6208	11.7057	10.6765	10.1823	10.7574	12.4734	11.1311	11.9584
tr|Q68FG2|Q68FG2_MOUSE	Sptbn2	Q68FG2_MOUSE Protein Sptbn2	158	20060.1	22266.7	20512.1	22969.9	17556.8	19212.3	21520.7	20033.1	20775.7	11.3241	11.3054	11.2571	10.9186	10.8019	11.5013	11.1452	10.4462	11.3002
sp|P17710|HXK1_MOUSE	Hk1	HXK1_MOUSE Hexokinase-1	148	18930.9	21587.4	19790.4	23192.2	17985.6	18389.5	19889.5	20895.9	20200.1	10.9281	11.2081	11.1064	11.2734	11.3158	11.2575	10.5331	11.1423	11.2354
sp|Q9R0K7|AT2B2_MOUSE	Atp2b2	AT2B2_MOUSE Plasma membrane calcium-transporting ATPase 2	144	18686.3	21708.9	19423.3	22009.2	17775.2	17127.7	19104.1	19305.9	19033.6	11.1986	11.7014	11.3164	11.1067	11.6102	10.8853	10.5034	10.6874	10.9906
sp|Q04447|KCRB_MOUSE	Ckb	KCRB_MOUSE Creatine kinase B-type	141	14701.3	17127.8	15268	18224.4	14816.1	15475.9	15740.7	16994.8	16292.5	10.5999	11.1073	10.7023	11.0647	11.6431	11.8332	10.4119	11.3189	11.3187
sp|O08599|STXB1_MOUSE	Stxbp1	STXB1_MOUSE Syntaxin-binding protein 1	136	25371.7	29050.8	28324.1	31646.4	24247.1	24515.2	29293.8	28387.4	27708.8	10.6647	10.9829	11.5745	11.2012	11.1083	10.9279	11.2963	11.0221	11.2222
sp|P62259|1433E_MOUSE	Ywhae	1433E_MOUSE 14-3-3 protein epsilon	130	14763.2	16177.1	12837.8	17094.1	14061.4	13505.5	14639.7	15449.6	14669.5	11.5634	11.3964	9.77557	11.2743	12.0039	11.218	10.5196	11.178	11.0709
tr|B1ARU1|B1ARU1_MOUSE	Macf1	B1ARU1_MOUSE Microtubule-actin cross-linking factor 1	130	18294.9	20804.6	20987.5	22548.5	16750	18047.1	22115.1	20637.3	21100.1	10.5462	10.7866	11.7618	10.9452	10.5237	11.0325	11.6954	10.989	11.7196
sp|Q9QYX7|PCLO_MOUSE	Pclo	PCLO_MOUSE Protein piccolo	130	19295.8	20896	22030.2	23244.3	16994.2	18852.9	24795.7	22622.2	22293.6	10.5603	10.2858	11.7214	10.712	10.1368	10.9419	12.4495	11.4364	11.7559
sp|P52480|KPYM_MOUSE	Pkm	KPYM_MOUSE Pyruvate kinase PKM	129	16275.9	17910.7	16866.2	18841	14787.1	15321.2	17707.8	17411.3	16608.4	11.1983	11.0836	11.2816	10.9157	11.0886	11.1789	11.1772	11.0657	11.0103
sp|P39053-4|DYN1_MOUSE	Dnm1	DYN1_MOUSE Isoform 4 of Dynamin-1	126	13900.8	14925.7	14061.8	15883.3	12515.4	13286.1	15368.9	14316.8	13719.3	11.3343	10.9459	11.1466	10.9052	11.1221	11.4882	11.4963	10.7831	10.7783
sp|Q6ZWR6|SYNE1_MOUSE	Syne1	SYNE1_MOUSE Nesprin-1	115	16233.6	17950.6	17490	18861	15019.9	14600.7	17756.5	18228.9	17485.6	11.0362	10.976	11.5596	10.7972	11.1291	10.5264	11.0745	11.4474	11.4537
sp|P17182|ENOA_MOUSE	Eno1	ENOA_MOUSE Alpha-enolase	108	16024.2	17531.5	15783.5	18989.7	14055.7	14935.6	19097.5	16921	15996.4	11.2176	11.0384	10.7417	11.1939	10.7242	11.0878	12.2648	10.9419	10.7897
sp|P12960|CNTN1_MOUSE	Cntn1	CNTN1_MOUSE Contactin-1	107	11960.7	13249.1	12337.8	14069.1	10837.1	10864.5	13192.5	12477.9	11887.5	11.2694	11.2277	11.3013	11.1622	11.1287	10.8556	11.4033	10.8599	10.7919
sp|E9Q401|RYR2_MOUSE	Ryr2	RYR2_MOUSE Ryanodine receptor 2	106	14654.6	15869.3	15944.3	17542.1	12741.2	14018.7	16433.9	15555.4	15567	11.0686	10.7805	11.7077	11.1568	10.4886	11.2287	11.3873	10.8528	11.3289
sp|P63101|1433Z_MOUSE	Ywhaz	1433Z_MOUSE 14-3-3 protein zeta/delta	105	12905.3	14450.2	13135.2	15188.6	11632.6	11031.8	14112.7	13108.4	12936.2	11.3845	11.4652	11.2649	11.2824	11.1843	10.3203	11.4213	10.6816	10.9955
sp|Q6PIE5|AT1A2_MOUSE	Atp1a2	AT1A2_MOUSE Sodium/potassium-transporting ATPase subunit alpha-2	104	15892.5	17805.6	17040.8	19198.4	14639.1	15471.9	17499.7	17368.8	17152.7	10.9131	10.997	11.3761	11.1009	10.9561	11.2668	11.0242	11.0171	11.3488
sp|Q91VR2|ATPG_MOUSE	Atp5c1	ATPG_MOUSE ATP synthase subunit gamma, mitochondrial	103	16225	17816.6	16025.1	19383.6	14724.7	16520.2	17574.7	17514.4	16412.1	11.1257	10.9882	10.6829	11.1922	11.0046	12.0132	11.0558	11.0938	10.8435
sp|Q8BPN8|DMXL2_MOUSE	Dmxl2	DMXL2_MOUSE DmX-like protein 2	101	14817	16292.8	15620.5	17759.4	13308.5	13818.2	16391.4	15600.8	15232.8	11.1494	11.0267	11.427	11.2527	10.9145	11.0266	11.3153	10.8437	11.0441
tr|S4R1P5|S4R1P5_MOUSE	Dst	S4R1P5_MOUSE Dystonin	101	12385	13407.5	14119.3	14763.2	11845.5	11654.6	15051.4	14691.3	14373	10.5765	10.298	11.7221	10.6161	11.0252	10.5546	11.7919	11.589	11.8265
sp|Q99KI0|ACON_MOUSE	Aco2	ACON_MOUSE Aconitate hydratase, mitochondrial	97	13155.8	14351.5	13447.6	15625.6	12133.9	13521.4	14412.6	14163.8	14282.2	10.97	10.7633	10.9013	10.9715	11.0275	11.9567	11.0253	10.9096	11.4748
sp|P26443|DHE3_MOUSE	Glud1	DHE3_MOUSE Glutamate dehydrogenase 1, mitochondrial	97	11786.9	13250.8	11638.2	14059.3	10543.1	11341.7	12442.1	12123	11516.8	11.3242	11.4502	10.8703	11.3739	11.0399	11.5554	10.9664	10.7587	10.6611
sp|P08249|MDHM_MOUSE	Mdh2	MDHM_MOUSE Malate dehydrogenase, mitochondrial	97	13068.6	15120.2	12030.5	15287.1	12005	11944.1	13604.3	13017.2	12392.7	11.521	11.9889	10.3108	11.3482	11.5348	11.1665	11.0027	10.6004	10.5266
sp|P13595|NCAM1_MOUSE	Ncam1	NCAM1_MOUSE Neural cell adhesion molecule 1	96	16013	18499.1	17132.1	19189.7	15064.3	14441.1	16668.9	16136.8	15237.7	11.2705	11.7107	11.7227	11.3731	11.556	10.7788	10.7632	10.4913	10.3336
sp|P60879|SNP25_MOUSE	Snap25	SNP25_MOUSE Synaptosomal-associated protein 25	95	7913.76	9089.63	8288.73	10187.5	7218.79	8383.88	8820.04	8519.73	8914.21	10.6892	11.0426	10.8843	11.587	10.6271	12.0091	10.9294	10.6299	11.6014
sp|P63011|RAB3A_MOUSE	Rab3a	RAB3A_MOUSE Ras-related protein Rab-3A	95	12429.9	14071.5	12218.4	14517.9	12104	10921.8	12228.5	12569.3	11350	11.5381	11.7482	11.0263	11.3478	12.2457	10.7513	10.4136	10.7776	10.1514
sp|P19096|FAS_MOUSE	Fasn	FAS_MOUSE Fatty acid synthase	94	15608.8	17586	16056.8	18183.1	13742.5	14407.7	16906.4	16182.1	16369.9	11.2427	11.3928	11.2437	11.0283	10.7883	11.0052	11.1716	10.7666	11.3608
sp|Q91ZX7|LRP1_MOUSE	Lrp1	LRP1_MOUSE Prolow-density lipoprotein receptor-related protein 1	92	10458.5	12391.4	11564.6	12812.6	9931.78	10396.3	10953.6	11515.1	11068.6	10.8003	11.5093	11.6103	11.1415	11.1784	11.3853	10.3773	10.9844	11.0134
sp|P46096|SYT1_MOUSE	Syt1	SYT1_MOUSE Synaptotagmin-1	92	15019.6	16475.3	15580.9	17600.4	13364.2	14061.8	17715.9	16086	15743.9	11.0793	10.9307	11.1736	10.9324	10.7444	11	11.9889	10.9608	11.1899
sp|Q3UNH4|GRIN1_MOUSE	Gprin1	GRIN1_MOUSE G protein-regulated inducer of neurite outgrowth 1	88	13497.7	15100	12862.5	15707.7	12930.5	12480.5	14550.1	14526.2	13675.7	11.2404	11.31	10.4134	11.0148	11.7361	11.0219	11.116	11.1742	10.9732
sp|Q9D6R2|IDH3A_MOUSE	Idh3a	IDH3A_MOUSE Isocitrate dehydrogenase [NAD] subunit alpha, mitochondrial	88	14037.9	15524.9	12566.2	16301.2	12574.4	12011.4	13511.3	13052.6	12762.3	11.9843	11.9206	10.4294	11.7184	11.6999	10.8744	10.582	10.2931	10.4978
sp|P10126|EF1A1_MOUSE	Eef1a1	EF1A1_MOUSE Elongation factor 1-alpha 1	87	19817.1	18858.8	19029.8	20475.6	17791.1	18106.7	20048.9	21296.7	17856.4	11.9105	10.1945	11.1191	10.3625	11.6541	11.5406	11.0546	11.8234	10.3406
sp|Q8VDN2|AT1A1_MOUSE	Atp1a1	AT1A1_MOUSE Sodium/potassium-transporting ATPase subunit alpha-1	87	13213.7	14371.3	13957.1	15617.5	11467.8	12382.6	14684	13819.6	13381.5	11.2343	10.9895	11.5362	11.1808	10.6265	11.1644	11.4532	10.8532	10.962
tr|D3YZ62|D3YZ62_MOUSE	Myo5a	D3YZ62_MOUSE Unconventional myosin-Va	87	12331.1	13908.2	13502.3	14919.5	11790.6	11204	14590.2	13644	13324.4	10.8083	10.9645	11.5056	11.0116	11.2637	10.4143	11.7322	11.0469	11.2529
sp|P05202|AATM_MOUSE	Got2	AATM_MOUSE Aspartate aminotransferase, mitochondrial	86	10545	11486.3	9786.3	12205.2	9617.32	10193.6	9739.86	10025.1	9628.42	11.791	11.5517	10.6382	11.4918	11.7205	12.0874	9.99123	10.3546	10.3734
sp|P17426|AP2A1_MOUSE	Ap2a1	AP2A1_MOUSE AP-2 complex subunit alpha-1	86	14601.3	16707.7	14946	17347.4	13961.6	14117.4	15424.3	16208.5	14981.3	11.0189	11.3403	10.9652	11.0235	11.4834	11.298	10.6786	11.2988	10.8933
sp|P05064|ALDOA_MOUSE	Aldoa	ALDOA_MOUSE Fructose-bisphosphate aldolase A	86	10978.8	11840.4	10371.6	12643.2	9974.07	10167	12336.4	11503.7	10886.5	11.3837	11.0422	10.4549	11.0389	11.2717	11.1795	11.7349	11.0181	10.8762
sp|Q9Z1G4|VPP1_MOUSE	Atp6v0a1	VPP1_MOUSE V-type proton ATPase 116 kDa subunit a isoform 1	85	11244.8	12214	11522.8	13064.2	9905	10734.5	12377.6	11734.7	11315.4	11.2775	11.0174	11.2348	11.0328	10.8269	11.4168	11.3883	10.8711	10.9344
sp|Q61879|MYH10_MOUSE	Myh10	MYH10_MOUSE Myosin-10	84	12145.1	13821.5	13490.1	14676.8	10799.1	12233.5	13472.1	13047.5	13008.6	10.8692	11.1253	11.737	11.0603	10.5334	11.6104	11.061	10.7861	11.2173
sp|Q60932|VDAC1_MOUSE	Vdac1	VDAC1_MOUSE Voltage-dependent anion-selective channel protein 1	84	9958.66	11092.9	9089.44	11653.9	9044.84	9084.13	9874.7	10009.1	9074.83	11.6988	11.7205	10.3806	11.5279	11.5805	11.3168	10.642	10.8612	10.2716
tr|Q3U2G2|Q3U2G2_MOUSE	Hspa4	Q3U2G2_MOUSE Heat shock 70 kDa protein 4	84	12445.1	14508.6	12992.9	15107.8	10942.3	11707.3	14501.6	13141	13470.6	10.9542	11.486	11.1182	11.1975	10.4973	10.928	11.7101	10.6844	11.4243
sp|Q9CQQ7|AT5F1_MOUSE	Atp5f1	AT5F1_MOUSE ATP synthase F(0) complex subunit B1, mitochondrial	84	15824.6	17006.4	14889.2	17893.5	14543	13816.8	16373.4	15404.9	14208.7	11.8	11.4057	10.7936	11.2353	11.8193	10.9259	11.2008	10.6108	10.2086
sp|Q02053|UBA1_MOUSE	Uba1	UBA1_MOUSE Ubiquitin-like modifier-activating enzyme 1	83	10010.8	10846.7	9804.41	11214.9	8772.19	8783.42	11135.7	10198.9	10034.6	11.5169	11.2234	10.9657	10.8643	10.9992	10.716	11.7529	10.8383	11.1232
sp|P35486|ODPA_MOUSE	Pdha1	ODPA_MOUSE Pyruvate dehydrogenase E1 component subunit alpha, somatic form, mitochondrial	81	11724.3	12954.5	11676.2	13987.6	10378.8	10802.4	11874.6	11475.7	11256.8	11.5382	11.4665	11.1711	11.5913	11.1323	11.2738	10.7209	10.432	10.674
sp|P62814|VATB2_MOUSE	Atp6v1b2	VATB2_MOUSE V-type proton ATPase subunit B, brain isoform	80	7851.65	8595.06	7494.23	8927.01	6577.54	7369.77	8252.15	7649.25	7907.29	11.6107	11.4316	10.7738	11.1158	10.601	11.5571	11.195	10.4486	11.2664
sp|Q64521|GPDM_MOUSE	Gpd2	GPDM_MOUSE Glycerol-3-phosphate dehydrogenase, mitochondrial	80	10845.7	11759.9	10443	12590.2	9739.35	9487.25	10628	10459	10163.2	11.7816	11.4897	11.0285	11.5164	11.5309	10.9291	10.5915	10.4948	10.6374
sp|P28652|KCC2B_MOUSE	Camk2b	KCC2B_MOUSE Calcium/calmodulin-dependent protein kinase type II subunit beta	79	7216.86	8203.85	7501.22	8790.64	7067.74	6973.77	8028.53	8193.79	7866.69	10.7871	11.029	10.9002	11.0641	11.5139	11.0541	11.0091	11.3131	11.3295
sp|Q8CAQ8|IMMT_MOUSE	Immt	IMMT_MOUSE Mitochondrial inner membrane protein	78	12486	13616.6	12181.9	14473.7	10684.8	11292.2	13674.9	12295	12511.2	11.5247	11.3041	10.9312	11.2493	10.7488	11.0531	11.5795	10.4827	11.1267
sp|Q7TSJ2|MAP6_MOUSE	Map6	MAP6_MOUSE Microtubule-associated protein 6	78	13781.2	15499.9	16514	17307.6	12369.8	13361.1	18300.5	16665.3	16191.1	10.301	10.4203	12.0003	10.8935	10.0772	10.5909	12.5492	11.5066	11.6609
sp|O35098|DPYL4_MOUSE	Dpysl4	DPYL4_MOUSE Dihydropyrimidinase-related protein 4	77	6911.22	7909.88	7741.38	8617.44	6508.22	7203.58	7734.16	7613.37	7267.11	10.6868	11.0008	11.6375	11.2205	10.9684	11.8125	10.9716	10.8746	10.8272
sp|Q8CI94|PYGB_MOUSE	Pygb	PYGB_MOUSE Glycogen phosphorylase, brain form	76	11086.7	12923.8	11671	13864.7	9677.99	10545.7	11607.7	11246.4	11474.9	11.136	11.6756	11.3968	11.7268	10.595	11.2332	10.6963	10.4348	11.1055
sp|P03995|GFAP_MOUSE	Gfap	GFAP_MOUSE Glial fibrillary acidic protein	75	7204.52	7361.79	5723.07	7669.11	5757.86	6825.05	6637.65	6759.62	8079.53	12.1127	11.1322	9.35431	10.8573	10.5508	12.1687	10.2379	10.4978	13.0883
sp|Q9Z2I9|SUCB1_MOUSE	Sucla2	SUCB1_MOUSE Succinyl-CoA ligase [ADP-forming] subunit beta, mitochondrial	75	9536.81	10838.6	9163.13	11140.5	8746.49	8614.13	9632.97	9274.13	8953.11	11.5917	11.8489	10.8276	11.4022	11.5868	11.1034	10.7415	10.4126	10.4853
sp|Q80TJ1-2|CAPS1_MOUSE	Cadps	CAPS1_MOUSE Isoform 2 of Calcium-dependent secretion activator 1	75	10178	11992	10508.2	12611.1	9994.32	9453.84	10432.2	10551.7	10131.4	11.0876	11.7497	11.1288	11.5682	11.8663	10.9215	10.4258	10.6179	10.6342
sp|P63328|PP2BA_MOUSE	Ppp3ca	PP2BA_MOUSE Serine/threonine-protein phosphatase 2B catalytic subunit alpha isoform	74	12279.2	12835.6	11705.8	13315.8	10650.7	11079.1	12273.5	11843.6	11243.5	11.9439	11.2293	11.0694	10.9065	11.2912	11.4283	10.9523	10.6415	10.5376
sp|Q9Z2H5|E41L1_MOUSE	Epb41l1	E41L1_MOUSE Band 4.1-like protein 1	74	9089.83	10086	9286.4	10685.3	7928.71	8504.38	9387.21	8950.63	8631.99	11.4997	11.4765	11.4215	11.383	10.9325	11.4097	10.895	10.4598	10.5221
sp|P10649|GSTM1_MOUSE	Gstm1	GSTM1_MOUSE Glutathione S-transferase Mu 1	74	9813.17	10616.3	9320.58	11494.5	8807.18	9066.22	9982.77	9988.47	9538.83	11.5597	11.2479	10.674	11.4017	11.3074	11.3257	10.7882	10.8687	10.8267
tr|J3QQ18|J3QQ18_MOUSE	Syngap1	J3QQ18_MOUSE Ras/Rap GTPase-activating protein SynGAP	74	9235.87	10355.1	10117.7	10977	8426.24	8892.86	10563.9	10172.6	9962.97	10.8746	10.966	11.5814	10.8832	10.8132	11.1039	11.4109	11.0639	11.3028
sp|P14094|AT1B1_MOUSE	Atp1b1	AT1B1_MOUSE Sodium/potassium-transporting ATPase subunit beta-1	74	11939	13957	13464	14943.1	11852.1	11906.5	14101.7	13907.7	13445.1	10.4319	10.9685	11.4371	10.9945	11.287	11.0326	11.3039	11.2251	11.3193
sp|O55143|AT2A2_MOUSE	Atp2a2	AT2A2_MOUSE Sarcoplasmic/endoplasmic reticulum calcium ATPase 2	74	11913.1	13563.8	12117.8	14192.8	11245.4	10617.3	12329.1	12046.4	11858	11.3217	11.5939	11.1958	11.3578	11.6479	10.7004	10.7493	10.5751	10.8582
tr|Q3UGX2|Q3UGX2_MOUSE	Sptb	Q3UGX2_MOUSE Spectrin beta 1	74	9075.7	9936.48	9364.9	10646.5	8049.46	8325.98	10493.8	10239.6	10266.8	10.9792	10.8115	11.0139	10.8452	10.6132	10.6814	11.6462	11.4424	11.9671
sp|O55131|SEPT7_MOUSE	2017-09-07	SEPT7_MOUSE Septin-7	73	11952.3	14018.3	12415	14511.5	11349.8	11950.5	12960.7	13284.5	11984.7	10.9052	11.5037	11.0122	11.1489	11.2864	11.5629	10.8485	11.1961	10.5359
sp|P11798|KCC2A_MOUSE	Camk2a	KCC2A_MOUSE Calcium/calmodulin-dependent protein kinase type II subunit alpha	72	11237	12433.5	11410.3	13484.1	10657	11746.5	13833	12961.8	11983.2	10.6868	10.6353	10.5497	10.7984	11.0463	11.8469	12.0691	11.3868	10.9807
sp|Q8VDD5|MYH9_MOUSE	Myh9	MYH9_MOUSE Myosin-9	72	8623.61	10124.7	9778.56	10155.7	7995.07	9098.68	9920.16	10448	10567.6	10.3793	10.9603	11.4419	10.2927	10.4879	11.6133	10.9536	11.6159	12.2551
tr|G5E829|G5E829_MOUSE	Atp2b1	G5E829_MOUSE MCG13663, isoform CRA_a	72	7542.25	8193.15	7737.93	8529.73	6825.34	7224.6	8444.06	7820.02	7966.35	11.1965	10.9394	11.1674	10.6624	11.0431	11.3735	11.4999	10.7233	11.3946
sp|P06745|G6PI_MOUSE	Gpi	G6PI_MOUSE Glucose-6-phosphate isomerase	72	9475.04	10350.7	9430.71	11404.7	8118.8	8775.4	10099.2	9494	9383.99	11.445	11.2451	11.0745	11.6	10.6884	11.2409	11.1914	10.5931	10.9215
tr|E9PUM4|E9PUM4_MOUSE	Tln2	E9PUM4_MOUSE Talin-2	72	10298.9	11978.8	11463.3	12482.6	9355.32	10049.8	11688.4	11326	10818.7	10.8192	11.3182	11.7074	11.042	10.7115	11.1959	11.2647	10.9906	10.9506
sp|P28660|NCKP1_MOUSE	Nckap1	NCKP1_MOUSE Nck-associated protein 1	72	9378.49	10366.6	10225.3	11144	8798.41	9021.86	10850.9	10143.3	10071	10.8784	10.8151	11.5307	10.8846	11.1231	11.0976	11.5468	10.8681	11.2556
tr|E9PWE8|E9PWE8_MOUSE	Dpysl3	E9PWE8_MOUSE Dihydropyrimidinase-related protein 3	71	6800.89	7807.55	8147.93	8892.36	6596.27	7525.21	7637.63	7652.1	7465.95	10.3561	10.6931	12.0621	11.4021	10.9475	12.152	10.6696	10.7634	10.9541
sp|Q80SW1|SAHH2_MOUSE	Ahcyl1	SAHH2_MOUSE Putative adenosylhomocysteinase 2	71	9023.1	10278.9	9079.59	10862.4	8349.75	8897.76	9322.14	9469.15	9395.77	11.1218	11.3953	10.88	11.2741	11.217	11.6305	10.5413	10.7813	11.1587
sp|Q9WV92-2|E41L3_MOUSE	Epb41l3	E41L3_MOUSE Isoform 2 of Band 4.1-like protein 3	71	9879.91	10889.8	9818.13	11294.2	8290.15	9013.21	10106.4	9155.68	9046.21	11.7943	11.6923	11.3945	11.3531	10.7862	11.4103	11.0682	10.096	10.4051
sp|Q9CZW5|TOM70_MOUSE	Tomm70a	TOM70_MOUSE Mitochondrial import receptor subunit TOM70	70	9394.64	10609.2	10068.2	11646.7	8548.13	8859.24	10637.7	10169.2	10027.5	10.9167	11.088	11.3739	11.396	10.826	10.9171	11.3401	10.9153	11.227
sp|Q8R081|HNRPL_MOUSE	Hnrnpl	HNRPL_MOUSE Heterogeneous nuclear ribonucleoprotein L	70	5754.36	6342.4	6196.35	7085.1	5600.44	5263.51	6689.73	7196.64	6492.23	10.6218	10.5297	11.1195	11.0125	11.2671	10.3033	11.3285	12.2708	11.5467
sp|P01942|HBA_MOUSE	Hba	HBA_MOUSE Hemoglobin subunit alpha	68	13412.2	13360.6	9798.56	12978.1	9784.23	11772.3	13696.7	13841.9	16171.7	12.1968	10.9278	8.66276	9.93798	9.69753	11.353	11.4268	11.6274	14.1698
sp|Q6ZQ38|CAND1_MOUSE	Cand1	CAND1_MOUSE Cullin-associated NEDD8-dissociated protein 1	68	9600.48	11388.9	10774.2	12058.8	9370.88	9366.11	10468.4	11303.9	10134.1	10.6167	11.3276	11.5832	11.229	11.2944	10.9839	10.6203	11.5469	10.798
sp|P17742|PPIA_MOUSE	Ppia	PPIA_MOUSE Peptidyl-prolyl cis-trans isomerase A	67	8647.4	9759.27	7601.62	9877.23	7592.51	8452.71	8139.21	8280.3	7699.19	11.8611	12.0398	10.1366	11.4082	11.3505	12.2952	10.242	10.4913	10.1753
sp|P30275|KCRU_MOUSE	Ckmt1	KCRU_MOUSE Creatine kinase U-type, mitochondrial	67	8771.67	9705.91	9391.17	10696.1	7614.65	8606.65	8760.51	8808.27	8742.57	11.2948	11.2407	11.7561	11.5974	10.6864	11.7525	10.3487	10.4768	10.8467
sp|P62983|RS27A_MOUSE	Rps27a	RS27A_MOUSE Ubiquitin-40S ribosomal protein S27a	67	8468.57	8577.68	8499.75	9951.84	7948.51	8369.97	9469.87	9208.61	8966.75	11.1137	10.1246	10.8443	10.9974	11.369	11.6486	11.4013	11.163	11.3382
sp|Q76MZ3|2AAA_MOUSE	Ppp2r1a	2AAA_MOUSE Serine/threonine-protein phosphatase 2A 65 kDa regulatory subunit A alpha isoform	67	9953.13	11409.3	10272.3	11940	9021.35	9382.83	10008.3	10162.7	9635.66	11.3243	11.6754	11.3623	11.4392	11.187	11.3211	10.4466	10.6808	10.5632
sp|P43006|EAA2_MOUSE	Slc1a2	EAA2_MOUSE Excitatory amino acid transporter 2	67	9047.32	11232.3	9514.66	10695.8	8797.04	9009.56	10162.9	10305.5	9924.63	10.6497	11.8917	10.8882	10.6015	11.286	11.2466	10.9748	11.2054	11.2562
sp|P50396|GDIA_MOUSE	Gdi1	GDIA_MOUSE Rab GDP dissociation inhibitor alpha	67	8231.59	9167.26	8140.29	9600.91	7545.98	7481.17	8571.69	8578.14	7933.91	11.4224	11.4413	10.9815	11.2183	11.4124	11.0089	10.912	10.9954	10.6078
sp|Q9EPN1|NBEA_MOUSE	Nbea	NBEA_MOUSE Neurobeachin	67	9519.55	10484.4	10426.3	11505.9	8913.29	8946.58	10149.4	10527.2	10151.3	10.9681	10.8648	11.6787	11.1629	11.1929	10.9314	10.728	11.2039	11.2694
sp|P62962|PROF1_MOUSE	Pfn1	PROF1_MOUSE Profilin-1	66	8032.73	8655.06	8091.21	9043.65	7705.55	7703.81	8436.1	8534.49	7708.04	11.3271	10.977	11.0921	10.7383	11.8425	11.5202	10.9133	11.1166	10.4727
sp|Q9D0M3|CY1_MOUSE	Cyc1	CY1_MOUSE Cytochrome c1, heme protein, mitochondrial	66	7203.85	7790.63	7262.29	8416.31	6097.52	6750.43	7713.78	7323.63	7005.14	11.4796	11.1659	11.2507	11.2933	10.5901	11.4075	11.2769	10.7802	10.7557
sp|A2AN08|UBR4_MOUSE	Ubr4	UBR4_MOUSE E3 ubiquitin-protein ligase UBR4	66	9359.46	10084.3	10609.4	10958.6	8942.64	9058.59	9704.37	10375.9	9401.6	11.028	10.6869	12.1529	10.8727	11.4841	11.3189	10.4899	11.293	10.6735
sp|P58252|EF2_MOUSE	Eef2	EF2_MOUSE Elongation factor 2	65	10238.8	9468.42	9888.1	9969.45	8892.87	10014.4	9471.44	10608.6	9472.24	12.0897	10.0555	11.3508	9.91236	11.4445	12.5398	10.2599	11.5709	10.7766
sp|Q01853|TERA_MOUSE	Vcp	TERA_MOUSE Transitional endoplasmic reticulum ATPase	65	8479	9606.33	9841.41	10882.5	7451.13	9058.91	9756.94	8746.58	9224.39	10.6659	10.8685	12.0353	11.5271	10.2155	12.0845	11.2597	10.1632	11.1802
sp|Q9QWI6|SRCN1_MOUSE	Srcin1	SRCN1_MOUSE SRC kinase signaling inhibitor 1	65	9094.85	10184.3	10148.9	11112.4	7546.31	8978.75	10584.8	9468.65	9219.4	11.0154	11.0942	11.95	11.3332	9.96151	11.5324	11.7611	10.5933	10.7589
sp|P63168|DYL1_MOUSE	Dynll1	DYL1_MOUSE Dynein light chain 1, cytoplasmic	65	4503.15	5113.86	4870.99	5801.01	4533.08	4259.93	4849.06	5382.75	4950.73	10.6277	10.8551	11.176	11.5283	11.6601	10.6617	10.4988	11.7346	11.2578
sp|Q9DBG3|AP2B1_MOUSE	Ap2b1	AP2B1_MOUSE AP-2 complex subunit beta	64	8428.54	8313.74	8162.77	8775.64	7296.29	7755.66	7882.98	8209.25	7379.44	12.1565	10.7849	11.4457	10.658	11.4696	11.8625	10.4306	10.9371	10.2552
sp|P18760|COF1_MOUSE	Cfl1	COF1_MOUSE Cofilin-1	64	11314.1	13591.5	12476.8	14471.1	10761.7	11381.3	12239.2	12177.7	11851.9	10.7193	11.5817	11.492	11.5448	11.1125	11.435	10.638	10.6574	10.8192
sp|P11499|HS90B_MOUSE	Hsp90ab1	HS90B_MOUSE Heat shock protein HSP 90-beta	64	7043.75	7422.89	7197.09	8101.94	6155.7	6588.5	7413.87	6999.95	7159.77	11.4717	10.8732	11.3953	11.1109	10.9266	11.3791	11.0772	10.5307	11.2353
sp|Q91VD9|NDUS1_MOUSE	Ndufs1	NDUS1_MOUSE NADH-ubiquinone oxidoreductase 75 kDa subunit, mitochondrial	64	9281.17	10552.2	9277.71	11110	8168.01	8466.06	9583.38	9102.57	9171.61	11.4491	11.7078	11.1265	11.5405	10.9818	11.0752	10.8455	10.3723	10.9013
sp|Q9D051|ODPB_MOUSE	Pdhb	ODPB_MOUSE Pyruvate dehydrogenase E1 component subunit beta, mitochondrial	64	10561.8	11376.5	9410.97	11451.9	8613.1	8790.01	10063.4	9041.24	8962.38	12.497	12.107	10.8255	11.41	11.1075	11.0296	10.9238	9.88183	10.2177
sp|P61264|STX1B_MOUSE	Stx1b	STX1B_MOUSE Syntaxin-1B	64	8199.99	9128.31	9222.37	10034.9	8172.21	8227.15	10699.7	9957.94	9712.3	10.2718	10.2846	11.2311	10.5849	11.1574	10.9291	12.2961	11.5225	11.7225
sp|Q8BL66|EEA1_MOUSE	Eea1	EEA1_MOUSE Early endosome antigen 1	63	10302.5	11519.5	10258.5	11863.7	9265.82	8781.51	11239.7	10504	10270.7	11.4539	11.5187	11.0876	11.1063	11.2274	10.3533	11.4637	10.7871	11.002
sp|Q61548|AP180_MOUSE	Snap91	AP180_MOUSE Clathrin coat assembly protein AP180	62	10641.5	11578.6	11198.7	12631.2	9567.05	9351.21	12566.9	11622.9	11200.5	11.0872	10.8502	11.3432	11.0816	10.8639	10.3321	12.0118	11.186	11.244
sp|P62737|ACTA_MOUSE	Acta2	ACTA_MOUSE Actin, aortic smooth muscle	61	4375.86	5675.66	4448.7	5132.76	4151.39	4695.17	5305.21	5162.62	4884.35	10.4253	12.162	10.304	10.2971	10.7797	11.8625	11.5955	11.3615	11.2123
tr|Q91VA7|Q91VA7_MOUSE	Idh3b	Q91VA7_MOUSE Isocitrate dehydrogenase 3 (NAD+) beta	61	8086.39	8871.71	8172.64	9902.33	7920.47	7794.12	9032.15	8531.59	8336.6	11.0099	10.8642	10.8177	11.3528	11.7534	11.2537	11.2818	10.73	10.9365
sp|P14152|MDHC_MOUSE	Mdh1	MDHC_MOUSE Malate dehydrogenase, cytoplasmic	61	6415.98	7292.23	6538.33	7907.49	6142.81	6141.54	7217.07	7106.78	6449.88	10.9492	11.1928	10.8475	11.3631	11.4254	11.1146	11.299	11.2029	10.6055
tr|E9PVY8|E9PVY8_MOUSE	Macf1	E9PVY8_MOUSE Microtubule-actin cross-linking factor 1	61	6426.36	7282.08	7198.45	8065.99	6093.26	6242.03	7031.19	7109.61	6917.81	10.7626	10.9691	11.7203	11.375	11.1222	11.0861	10.803	10.9987	11.1631
sp|P17427|AP2A2_MOUSE	Ap2a2	AP2A2_MOUSE AP-2 complex subunit alpha-2	61	9335.92	10567.8	9699.7	11208.5	8717.38	8615.11	10083.9	9905.33	9381.19	11.1426	11.3442	11.2547	11.2646	11.3397	10.9041	11.0413	10.9204	10.7882
sp|P84091|AP2M1_MOUSE	Ap2m1	AP2M1_MOUSE AP-2 complex subunit mu	60	11297.4	13279.5	11643.8	14016.7	10884.1	11267.2	11978.8	12171.3	11857.1	10.8805	11.503	10.9021	11.3672	11.4248	11.5076	10.5838	10.828	11.003
sp|D3Z7P3|GLSK_MOUSE	Gls	GLSK_MOUSE Glutaminase kidney isoform, mitochondrial	60	7098.94	8102	7580.29	8786.36	6509.77	6718.85	7749.55	7431.88	6799.59	11.1094	11.4038	11.5327	11.5783	11.1033	11.1505	11.1259	10.7433	10.2528
sp|O08788|DCTN1_MOUSE	Dctn1	DCTN1_MOUSE Dynactin subunit 1	60	7760.6	8787.79	8760.02	9629.11	7113.41	7321.54	9055.43	8402.84	8511.12	10.7672	10.966	11.8157	11.2495	10.7565	10.7723	11.526	10.769	11.3777
sp|P68254|1433T_MOUSE	Ywhaq	1433T_MOUSE 14-3-3 protein theta	60	5654.03	6533.83	6238.15	7016.62	5245.26	5385.87	6639.82	6700.9	6756.61	10.5243	10.9387	11.2886	10.9978	10.6412	10.6315	11.3385	11.5216	12.1179
sp|Q64514|TPP2_MOUSE	Tpp2	TPP2_MOUSE Tripeptidyl-peptidase 2	59	7618.61	8282.78	8086.76	8701.05	6923.81	7717.69	7797.78	8359.18	7746.92	11.1502	10.903	11.5061	10.723	11.0443	11.9783	10.4698	11.3009	10.9244
sp|Q8K0U4|HS12A_MOUSE	Hspa12a	HS12A_MOUSE Heat shock 70 kDa protein 12A	59	7841.96	8775.46	8102.1	9264.81	6858.18	7385.66	8251.6	7858.68	7599.42	11.3864	11.4602	11.4368	11.3276	10.8532	11.3724	10.9916	10.5403	10.6317
sp|Q3UQ44|IQGA2_MOUSE	Iqgap2	IQGA2_MOUSE Ras GTPase-activating-like protein IQGAP2	59	8108.55	8573.62	8094.96	9078.75	6985.61	7675.77	8883.94	8964.15	8624.48	11.2888	10.7357	10.9563	10.6431	10.5997	11.3325	11.3467	11.528	11.5691
tr|E9Q3L2|E9Q3L2_MOUSE	Pi4ka	E9Q3L2_MOUSE Protein Pi4ka	59	7498.97	8688.86	7594.64	9251.07	7159.48	7175.59	7501.78	7946.15	7905.01	11.0704	11.5369	10.8998	11.4999	11.5195	11.2337	10.1599	10.8358	11.2442
sp|P10637-2|TAU_MOUSE	Mapt	TAU_MOUSE Isoform Tau-A of Microtubule-associated protein tau	59	8627.65	9757.56	9516.55	10641.2	8285.13	8517.66	10078.7	9837.91	9205.82	10.6669	10.8505	11.4386	11.0784	11.1643	11.1678	11.4317	11.2354	10.9665
sp|Q60930|VDAC2_MOUSE	Vdac2	VDAC2_MOUSE Voltage-dependent anion-selective channel protein 2	59	7980.22	8796.28	7518.29	9221.21	7073.41	6947.14	7664.98	7476.89	7165.01	11.9314	11.8287	10.928	11.6092	11.5263	11.0149	10.5135	10.3261	10.3218
sp|Q9ERU9|RBP2_MOUSE	Ranbp2	RBP2_MOUSE E3 SUMO-protein ligase RanBP2	59	7536.25	8109.45	8791.58	8920.82	6956.17	6668.16	8862.29	9200.03	8491.36	10.7122	10.3676	12.1489	10.6775	10.7766	10.0515	11.5566	12.0796	11.6295
sp|Q80YX1|TENA_MOUSE	Tnc	TENA_MOUSE Tenascin	58	6706.94	8180.91	7457.17	8618.36	6537.28	7804.02	6857.7	6678.3	6647.21	10.6734	11.7096	11.5372	11.549	11.3387	13.1704	10.012	9.81718	10.1925
sp|O08638|MYH11_MOUSE	Myh11	MYH11_MOUSE Myosin-11	58	7769.51	12449.6	9461.51	8724.98	8494.91	9904.48	9825.29	11011.1	11174.9	9.11632	13.1384	10.7928	8.62045	10.8636	12.3242	10.5763	11.9343	12.6337
sp|Q9Z0E0|NCDN_MOUSE	Ncdn	NCDN_MOUSE Neurochondrin	58	6368.9	7379.94	6504.86	8103.25	5806.54	6624.9	6539.94	7065.67	7348.19	10.7738	11.2284	10.6977	11.5426	10.7056	11.8846	10.1494	11.0408	11.977
sp|B9EKR1|PRPTZ_MOUSE	Ptprz1	PRPTZ_MOUSE Receptor-type tyrosine-protein phosphatase zeta	58	7234.92	8239.28	6803.29	8206.49	6444.69	6811	7144.98	7036.42	7093.08	11.612	11.8939	10.6154	11.091	11.2736	11.5927	10.5205	10.4319	10.9691
sp|P05063|ALDOC_MOUSE	Aldoc	ALDOC_MOUSE Fructose-bisphosphate aldolase C	58	9782.29	10921.5	9497.86	11361	8748.26	8735.36	10153.9	9545.35	9430.94	11.5872	11.6354	10.9373	11.3317	11.294	10.9728	11.034	10.4441	10.7635
sp|Q8BX70|VP13C_MOUSE	Vps13c	VP13C_MOUSE Vacuolar protein sorting-associated protein 13C	58	8404.56	9176.25	8967.91	9668.39	7793.31	7793.58	9350	9155.64	8724.8	11.0998	10.9	11.5143	10.7521	11.2179	10.9154	11.3285	11.1694	11.1024
sp|P48962|ADT1_MOUSE	Slc25a4	ADT1_MOUSE ADP/ATP translocase 1	58	10454.1	11583	10053.1	12380.1	9962.43	9300.8	10537	10534.3	10199.6	11.4859	11.4462	10.7381	11.4536	11.9298	10.8368	10.6208	10.6912	10.7975
sp|P57780|ACTN4_MOUSE	Actn4	ACTN4_MOUSE Alpha-actinin-4	57	9298.74	10948.8	8938.62	10470.7	8140.95	8662.99	9498.5	9003.33	8859.17	11.583	12.2666	10.8246	10.9828	11.0524	11.4436	10.8546	10.3595	10.6329
sp|Q8C0T5|SI1L1_MOUSE	Sipa1l1	SI1L1_MOUSE Signal-induced proliferation-associated 1-like protein 1	57	6684.86	7542.6	7162.24	8036.08	6046.36	6508.73	7420.39	7257.54	7159.05	10.9408	11.103	11.396	11.0749	10.7854	11.2968	11.1415	10.972	11.2895
sp|Q8K1M6|DNM1L_MOUSE	Dnm1l	DNM1L_MOUSE Dynamin-1-like protein	57	10078.4	11102.3	10186.1	11708.3	9406.92	9364.49	10052.6	10578.3	9846.26	11.3893	11.2844	11.1908	11.1414	11.5862	11.2225	10.4219	11.0424	10.7211
sp|Q4KMM3|OXR1_MOUSE	Oxr1	OXR1_MOUSE Oxidation resistance protein 1	57	8701.95	9525.17	8503.27	10010.9	7503.36	7870.16	9063.79	8309.87	8404.29	11.6682	11.4874	11.0846	11.3032	10.9655	11.1911	11.1496	10.2925	10.858
sp|Q9WUA3|K6PP_MOUSE	Pfkp	K6PP_MOUSE 6-phosphofructokinase type C	57	8540.21	9499.8	8573.66	9752.04	7793.7	7901.48	8907.65	8785.89	8488.91	11.3912	11.3966	11.1177	10.9531	11.3301	11.1766	10.9	10.825	10.9098
sp|Q9QXS6|DREB_MOUSE	Dbn1	DREB_MOUSE Drebrin	57	6392.87	7307.86	5801.2	7209.3	5553.24	5709.76	6601.19	6334.1	6231.62	11.6882	12.0172	10.3114	11.0991	11.0659	11.0706	11.0723	10.6974	10.9778
sp|Q60864|STIP1_MOUSE	Stip1	STIP1_MOUSE Stress-induced-phosphoprotein 1	57	8972.3	10015.3	8872.57	10747.4	7957.33	7946.9	9035.97	8578.18	8808.76	11.5836	11.6296	11.1362	11.6838	11.1968	10.8802	10.7023	10.23	10.9576
sp|P62204|CALM_MOUSE	Calm1	CALM_MOUSE Calmodulin	57	5558.81	7878.31	4858.57	5233.31	3850.48	3996.81	3724.1	3696.39	3116.91	13.8817	17.6952	11.7955	11.0047	10.48	10.5846	8.53186	8.52668	7.49975
sp|Q9JMH9-6|MY18A_MOUSE	Myo18a	MY18A_MOUSE Isoform 6 of Unconventional myosin-XVIIIa	56	6836.95	7369.88	7373.95	8022.86	6072.37	6896.88	7855.1	7521.29	7484.54	10.9064	10.574	11.4357	10.7767	10.5575	11.6673	11.4956	11.0828	11.5039
sp|Q7TPR4|ACTN1_MOUSE	Actn1	ACTN1_MOUSE Alpha-actinin-1	56	6874.55	8066.32	6436.31	7869.9	6352.42	6513.8	6688.12	6859.15	6621.44	11.5158	12.1531	10.4818	11.101	11.5979	11.5714	10.2782	10.6136	10.6872
sp|Q9CZU6|CISY_MOUSE	Cs	CISY_MOUSE Citrate synthase, mitochondrial	56	7396.75	7997.49	7718.63	9122.81	6668.58	7210.83	8045.26	7888.18	7685.73	11.0791	10.774	11.2396	11.5062	10.8864	11.4538	11.0551	10.9139	11.092
sp|Q91V14|S12A5_MOUSE	Slc12a5	S12A5_MOUSE Solute carrier family 12 member 5	56	7974.97	9051.6	7232.93	9382.26	7546.7	7264.77	7266.69	7843.28	7596.36	11.6921	11.9357	10.3092	11.5827	12.0589	11.295	9.77375	10.6219	10.7308
tr|E9Q616|E9Q616_MOUSE	Ahnak	E9Q616_MOUSE Protein Ahnak	55	7690.6	10648.1	9498.07	8698.17	7894.99	10081.7	10990.3	13998.3	13279.3	8.64793	10.7692	10.3833	8.23606	9.67588	12.0223	11.3376	14.5401	14.3876
sp|P97427|DPYL1_MOUSE	Crmp1	DPYL1_MOUSE Dihydropyrimidinase-related protein 1	55	7964.87	8457.35	8471.32	9589.02	6692.95	7906.45	8427.73	7965.03	7977.61	11.3239	10.8147	11.7089	11.4797	10.3711	11.9207	10.9923	10.4604	10.9283
sp|Q60597-3|ODO1_MOUSE	Ogdh	ODO1_MOUSE Isoform 3 of 2-oxoglutarate dehydrogenase, mitochondrial	55	6311.05	7022.62	6188.8	7232.65	5360.53	6237.84	6804.61	6461.7	6560.97	11.3254	11.3348	10.797	10.9292	10.4845	11.871	11.2025	10.7112	11.3444
sp|P70398|USP9X_MOUSE	Usp9x	USP9X_MOUSE Probable ubiquitin carboxyl-terminal hydrolase FAF-X	55	8133.24	9507	8810.44	9847.48	7641.96	7889.64	8443.22	8943.33	8498.02	10.927	11.488	11.5076	11.1405	11.19	11.2408	10.4066	11.0989	11.0007
sp|Q9JIS5|SV2A_MOUSE	Sv2a	SV2A_MOUSE Synaptic vesicle glycoprotein 2A	55	8308.94	9254.21	8090.54	9756.17	7776.65	7627.77	8245.26	8631.44	7984.65	11.4593	11.4792	10.8476	11.33	11.6894	11.156	10.4322	10.996	10.6103
sp|D3YZU1|SHAN1_MOUSE	Shank1	SHAN1_MOUSE SH3 and multiple ankyrin repeat domains protein 1	55	6644.77	7407.88	7227.22	7881.9	6112.32	6401.47	7979.12	7317.05	7163.64	10.8217	10.851	11.4428	10.809	10.8494	11.0559	11.9215	11.0076	11.2411
sp|G5E8K5|ANK3_MOUSE	Ank3	ANK3_MOUSE Ankyrin-3	55	7391.91	7991.82	8388.24	9137.25	6362.96	7352.99	9516.15	8801.43	8972.27	10.4602	10.1717	11.5399	10.8878	9.81367	11.0344	12.354	11.5048	12.2335
sp|Q9QVP9|FAK2_MOUSE	Ptk2b	FAK2_MOUSE Protein-tyrosine kinase 2-beta	55	8558.75	9482.5	8790.46	10340.4	7797.43	7708.1	9378.22	9070.1	8759.54	11.1974	11.1581	11.1806	11.3916	11.1185	10.6944	11.2561	10.9613	11.0421
sp|P35564|CALX_MOUSE	Canx	CALX_MOUSE Calnexin	55	11195.7	12191.8	11164.9	13291	10196.8	9379.77	11405.6	11177.5	10196.2	11.6767	11.4367	11.3206	11.6726	11.591	10.3744	10.9131	10.7685	10.2464
sp|Q9DBJ1|PGAM1_MOUSE	Pgam1	PGAM1_MOUSE Phosphoglycerate mutase 1	54	5103.89	5459.75	4756.94	5768.29	4378.52	4760.08	4498.29	4595.76	4505.32	12.1436	11.6837	11.0033	11.5567	11.3543	12.0105	9.81875	10.1006	10.3284
sp|Q641P0|ARP3B_MOUSE	Actr3b	ARP3B_MOUSE Actin-related protein 3B	54	4924.18	5388.58	4729.23	5691.33	4531.65	4760.38	4982.72	5124.63	5098.38	11.3551	11.1761	10.6021	11.0512	11.3894	11.6412	10.5411	10.9159	11.3279
tr|E9Q3M9|E9Q3M9_MOUSE	2010300C02Rik	E9Q3M9_MOUSE Protein 2010300C02Rik	54	5981.63	6484.16	6309.16	7139.52	5300.21	6115.28	7339.65	6595.44	6967.36	10.7275	10.4591	11.0001	10.7817	10.36	11.6304	12.0758	10.926	12.0395
sp|P50518|VATE1_MOUSE	Atp6v1e1	VATE1_MOUSE V-type proton ATPase subunit E 1	54	5809.71	6230.41	5921.41	6816.58	5265.2	5636.32	6810.5	6412.24	6020.81	11.0455	10.6539	10.9446	10.9128	10.9102	11.3639	11.8787	11.2611	11.0293
sp|P61161|ARP2_MOUSE	Actr2	ARP2_MOUSE Actin-related protein 2	54	7982.95	8530.59	7495.25	8823.38	7018.88	7154.17	8036.22	7716.85	7389.06	11.8743	11.4126	10.8387	11.0514	11.3789	11.2851	10.9662	10.6029	10.59
sp|Q8BVE3|VATH_MOUSE	Atp6v1h	VATH_MOUSE V-type proton ATPase subunit H	54	8257.77	9359.17	8829.46	10147.6	7952.25	7875.2	8292.12	8738.91	8280.48	11.0871	11.302	11.5249	11.4725	11.6368	11.2129	10.2137	10.8381	10.7121
sp|P70336|ROCK2_MOUSE	Rock2	ROCK2_MOUSE Rho-associated protein kinase 2	54	10145.6	11323.3	11251.5	12185.2	8902.57	9751.93	11708.4	11074.1	11165.6	10.8739	10.9154	11.7237	10.9971	10.3994	11.084	11.5124	10.9637	11.5305
sp|Q64332|SYN2_MOUSE	Syn2	SYN2_MOUSE Synapsin-2	54	6663.06	7296.38	5969.95	7136.63	5692.75	5768.14	6805.17	6453.48	5848.44	12.0708	11.8886	10.5143	10.8867	11.2401	11.0815	11.31	10.7994	10.2086
sp|O55042|SYUA_MOUSE	Snca	SYUA_MOUSE Alpha-synuclein	54	9705.24	9881.17	7069.41	9214.12	7785.27	7550.67	9404.31	8312.71	7286.51	13.2869	12.1671	9.40911	10.6221	11.6166	10.9624	11.8116	10.5124	9.6117
sp|Q99PV0|PRP8_MOUSE	Prpf8	PRP8_MOUSE Pre-mRNA-processing-splicing factor 8	54	7424.88	7805.98	8704.02	8797.2	6801.21	6646.67	9502.84	9795.58	8943.69	10.434	9.86621	11.8913	10.4099	10.4168	9.90527	12.2511	12.7155	12.1099
sp|Q91XV3|BASP1_MOUSE	Basp1	BASP1_MOUSE Brain acid soluble protein 1	54	4304.88	6744.27	6741.17	5427.48	4190.76	5459.43	17841.3	15310.9	18139.1	5.39189	7.5976	8.20846	5.72424	5.72084	7.2515	20.5007	17.7142	21.8906
sp|Q8BTM8|FLNA_MOUSE	Flna	FLNA_MOUSE Filamin-A	53	6124.65	10489.8	6785.55	6127.71	6291.85	7836.94	6792.62	8265.24	8684.74	9.4635	14.578	10.193	7.97275	10.5959	12.8415	9.62873	11.7969	12.9297
sp|P63044|VAMP2_MOUSE	Vamp2	VAMP2_MOUSE Vesicle-associated membrane protein 2	53	3883.72	4109.67	4037.14	4579.48	3377.72	4210.11	4300.19	4219.1	4266.77	10.9522	10.4237	11.0682	10.8745	10.3816	12.5907	11.1251	10.9905	11.5935
sp|Q9DC07|LNEBL_MOUSE	Nebl	LNEBL_MOUSE LIM zinc-binding domain-containing Nebulette	53	5451.13	6056.6	4956.91	6304.58	4880.36	5361.72	5174.13	5253.79	5150.8	11.6992	11.6912	10.3425	11.3937	11.4158	12.2032	10.1875	10.4156	10.6514
sp|P18872|GNAO_MOUSE	Gnao1	GNAO_MOUSE Guanine nucleotide-binding protein G(o) subunit alpha	53	7048.9	8424.7	8132.79	9514.38	6553.8	7743.32	7593.61	7786.51	7985.8	10.4039	11.1838	11.6697	11.8248	10.5428	12.12	10.2822	10.616	11.3568
sp|A2CG49|KALRN_MOUSE	Kalrn	KALRN_MOUSE Kalirin	53	7962.16	9023.72	8225.86	9308.12	7277.13	7712.78	8242.62	8131.85	8175.69	11.2183	11.4352	11.2674	11.0433	11.1749	11.5241	10.6543	10.5835	11.099
sp|Q8CHC4|SYNJ1_MOUSE	Synj1	SYNJ1_MOUSE Synaptojanin-1	53	8023.9	9083.56	8348.27	9848.8	7093.24	8073.02	9358.38	9088.08	9042.43	10.7576	10.9534	10.8811	11.1187	10.3648	11.478	11.5105	11.255	11.6809
sp|P17156|HSP72_MOUSE	Hspa2	HSP72_MOUSE Heat shock-related 70 kDa protein 2	53	7469.88	8404.55	7983.97	9116.16	6567.02	7177.83	8197.66	7769.4	7741.32	11.0841	11.2166	11.5173	11.3904	10.6204	11.2948	11.1593	10.6492	11.0678
sp|P68404|KPCB_MOUSE	Prkcb	KPCB_MOUSE Protein kinase C beta type	53	5320.02	6506.68	5500.59	6500.95	5391.26	5014.85	4959.41	5395.93	5407.25	11.0991	12.2094	11.1565	11.4206	12.2589	11.0951	9.49215	10.3987	10.8695
sp|P62748|HPCL1_MOUSE	Hpcal1	HPCL1_MOUSE Hippocalcin-like protein 1	53	7990.31	8362.05	8447.64	9917.81	7501.26	7656.14	9946.13	9981.42	9380.32	10.5479	9.9283	10.8413	11.0244	10.7925	10.7179	12.0453	12.1712	11.9311
sp|Q8BKX1-2|BAIP2_MOUSE	Baiap2	BAIP2_MOUSE Isoform 2 of Brain-specific angiogenesis inhibitor 1-associated protein 2	52	7533.59	8262.93	7666.13	8790.53	6519.09	7323.97	7890.03	7663.69	7456.76	11.381	11.2272	11.259	11.1823	10.7337	11.7334	10.935	10.6944	10.854
sp|P26039|TLN1_MOUSE	Tln1	TLN1_MOUSE Talin-1	52	5668.9	7330.33	6462.43	6884.48	5657.32	6225.91	6508.32	7504.61	7478.56	9.90743	11.5225	10.9801	10.1315	10.7761	11.5389	10.435	12.1152	12.5934
sp|P63318|KPCG_MOUSE	Prkcg	KPCG_MOUSE Protein kinase C gamma type	52	5469.12	6912.9	6164.1	7150.9	5343.92	5570.8	5744.98	6113.72	5803.9	10.5291	11.97	11.5369	11.5924	11.213	11.3735	10.1467	10.8723	10.766
sp|Q9QYB8|ADDB_MOUSE	Add2	ADDB_MOUSE Beta-adducin	52	7125.88	8065.7	7721.44	8843.2	6750.5	7156.64	8307.74	8573.42	8096.69	10.5377	10.7278	11.1008	11.0118	10.8801	11.2232	11.2707	11.7113	11.5366
sp|P08553|NFM_MOUSE	Nefm	NFM_MOUSE Neurofilament medium polypeptide	52	9240.55	9257.53	8068.26	9696.45	7676.35	7908.22	9887.35	7960.72	8963.52	12.2571	11.0445	10.4044	10.8303	11.0977	11.1242	12.0318	9.75402	11.4559
sp|Q9JME5|AP3B2_MOUSE	Ap3b2	AP3B2_MOUSE AP-3 complex subunit beta-2	52	8788.97	9502.08	8817.31	10167.5	7797.08	7897.46	9446.32	8738.24	8464.24	11.5287	11.2105	11.2441	11.2305	11.1471	10.9858	11.3676	10.5879	10.6978
sp|P28663|SNAB_MOUSE	Napb	SNAB_MOUSE Beta-soluble NSF attachment protein	52	9046.83	9952.48	8561.2	10345.4	8308.93	7824.96	9225.08	9148.61	8467.97	11.6794	11.5562	10.745	11.2463	11.6911	10.7129	10.9259	10.9099	10.5333
sp|P56564|EAA1_MOUSE	Slc1a3	EAA1_MOUSE Excitatory amino acid transporter 1	52	4306.59	5996.11	5684.63	6632.05	4702.45	4473.41	5523.84	5681.9	5336	9.33431	11.6891	11.9784	12.1042	11.1086	10.2822	10.9838	11.3758	11.1436
sp|P06151|LDHA_MOUSE	Ldha	LDHA_MOUSE L-lactate dehydrogenase A chain	51	6818.84	7321.98	6536.12	7681.23	5975.38	6348.03	6887.92	6724.01	6628.72	11.6785	11.2788	10.8828	11.0776	11.1539	11.5296	10.8224	10.6376	10.9387
sp|P15105|GLNA_MOUSE	Glul	GLNA_MOUSE Glutamine synthetase	51	7500.15	9120.68	8042.75	10202.4	7261.26	7644.45	8053.33	8208.98	8198.97	10.5628	11.5531	11.0119	12.0991	11.1458	11.4171	10.4051	10.6793	11.1258
sp|Q64727|VINC_MOUSE	Vcl	VINC_MOUSE Vinculin	51	6915.62	9042.32	7301.39	8011.13	6367.2	6811.49	7619.25	7649.78	7847.78	10.6932	12.5752	10.9756	10.4306	10.7303	11.1691	10.8081	10.9261	11.6919
sp|Q9D6M3|GHC1_MOUSE	Slc25a22	GHC1_MOUSE Mitochondrial glutamate carrier 1	51	7149.52	7960.61	7150.17	8623.77	6746.14	6681.42	7758.95	7498.92	7113.39	11.1957	11.212	10.8852	11.3713	11.5138	11.0954	11.1465	10.8471	10.7328
sp|P08113|ENPL_MOUSE	Hsp90b1	ENPL_MOUSE Endoplasmin	51	7768.03	8077.63	7936.81	8783.67	6822.2	6865.91	7844.76	7743.94	7205.96	11.7421	10.982	11.6635	11.1802	11.2395	11.0061	10.8787	10.8128	10.4952
sp|P63038|CH60_MOUSE	Hspd1	CH60_MOUSE 60 kDa heat shock protein, mitochondrial	51	9550.72	10630.5	9554.18	11442.3	8687.73	8627.64	10008.8	9357.91	9163.47	11.4642	11.4769	11.1493	11.5654	11.3658	10.9825	11.0218	10.376	10.5981
sp|Q5SQX6|CYFP2_MOUSE	Cyfip2	CYFP2_MOUSE Cytoplasmic FMR1-interacting protein 2	51	7576.34	8476.55	7757.36	8846.27	6664.39	6881.09	8089.99	7603.28	7548.86	11.3981	11.4697	11.3458	11.2066	10.9275	10.9782	11.1656	10.5661	10.9425
sp|P38647|GRP75_MOUSE	Hspa9	GRP75_MOUSE Stress-70 protein, mitochondrial	51	7513.02	8278.11	6836.54	8282.94	6315.44	6264.93	7364.95	6624.11	6617.66	12.2445	12.1344	10.832	11.3671	11.2181	10.8279	11.0118	9.9723	10.3919
tr|D3Z2Z1|D3Z2Z1_MOUSE	Clip1	D3Z2Z1_MOUSE CAP-Gly domain-containing linker protein 1	51	7501.78	8472.14	7931.04	9013.38	7194.6	6807.19	8661.73	8237.21	7735.63	10.953	11.1256	11.2576	11.0814	11.4488	10.5399	11.602	11.1094	10.8824
tr|E9PVA8|E9PVA8_MOUSE	Gcn1l1	E9PVA8_MOUSE Protein Gcn1l1	51	5545	5925.44	6283.31	6657.43	5336.46	5051.23	6728.59	6781.43	6414.24	10.5863	10.1748	11.6621	10.7026	11.1041	10.2268	11.785	11.9593	11.7991
sp|P02088|HBB1_MOUSE	Hbb-b1	HBB1_MOUSE Hemoglobin subunit beta-1	50	7009.31	7354.01	5219.68	7326.42	5467.25	7332.53	7405.57	7650.48	9393.38	11.3947	10.7526	8.24934	10.0291	9.6869	12.641	11.0446	11.4884	14.7134
sp|Q6P9K8|CSKI1_MOUSE	Caskin1	CSKI1_MOUSE Caskin-1	50	5011.25	5791.47	5887.13	6493.09	4777.3	5149.14	6053.43	6037.08	5895.16	10.2504	10.6547	11.7069	11.1837	10.6503	11.1694	11.3594	11.4067	11.6185
sp|Q7TPH6|MYCB2_MOUSE	Mycbp2	MYCB2_MOUSE E3 ubiquitin-protein ligase MYCBP2	50	6992.89	7573.38	8191.83	8334.17	6363.01	6773.69	9297.94	9400.08	8627.09	10.219	9.95414	11.6381	10.2555	10.1345	10.4973	12.4653	12.6889	12.1473
sp|Q8BG05|ROA3_MOUSE	Hnrnpa3	ROA3_MOUSE Heterogeneous nuclear ribonucleoprotein A3	49	4138.41	4209.38	4510.23	5384.81	3264.65	4928.01	4692.38	4210.04	5107.69	10.6818	9.77213	11.3176	11.7036	9.18404	13.4891	11.1113	10.0378	12.7027
sp|Q9Z1S5|SEPT3_MOUSE	2017-09-03	SEPT3_MOUSE Neuronal-specific septin-3	49	7869.04	8999.28	8101.94	9468.25	6310.83	7213.75	8211.3	7503.22	7307.33	11.5985	11.9302	11.6095	11.7514	10.138	11.2756	11.1033	10.2157	10.3777
sp|P04370|MBP_MOUSE	Mbp	MBP_MOUSE Myelin basic protein	49	9186.98	9066.99	7533.23	10398.8	8264.19	8066.49	9648.31	9073.86	8903.77	11.9629	10.6191	9.53656	11.4021	11.7287	11.1391	11.5259	10.9143	11.1712
sp|Q8BYI9|TENR_MOUSE	Tnr	TENR_MOUSE Tenascin-R	49	5835.91	6430.1	5274.96	6136.69	4936.76	4891.73	5337.02	5059.42	5008.88	12.4489	12.3368	10.9393	11.0229	11.4776	11.0659	10.4444	9.96929	10.295
sp|P28738|KIF5C_MOUSE	Kif5c	KIF5C_MOUSE Kinesin heavy chain isoform 5C	49	7949.93	8929.31	8548.52	9376.81	7265.1	7252.28	8564.77	8331.69	7804.98	11.2176	11.3322	11.7266	11.1411	11.1728	10.852	11.0869	10.8595	10.6113
sp|Q5SNZ0|GRDN_MOUSE	Ccdc88a	GRDN_MOUSE Girdin	49	6995.47	7660.43	7565.86	8123.95	6337.89	6505.14	7959.86	7886.36	7467.02	10.9871	10.8214	11.5524	10.7442	10.8492	10.8349	11.4692	11.4416	11.3
sp|Q91V92|ACLY_MOUSE	Acly	ACLY_MOUSE ATP-citrate synthase	49	7359.21	8215.86	7519.73	8587.07	6519.66	6603.24	8224.22	7859.14	7869.7	11.1867	11.2327	11.1127	10.9914	10.8014	10.6445	11.469	11.0353	11.5263
sp|P17751|TPIS_MOUSE	Tpi1	TPIS_MOUSE Triosephosphate isomerase	48	8172.07	8856.69	8841.71	10172.6	7290.69	8681.39	9996.46	9176.46	8429.4	10.7215	10.451	11.2773	11.2382	10.4251	12.0785	12.0318	11.1209	10.6557
sp|Q61644|PACN1_MOUSE	Pacsin1	PACN1_MOUSE Protein kinase C and casein kinase substrate in neurons protein 1	48	7656.85	8726.27	7711.79	9256.01	6852.42	7275.06	7719.81	7766.88	7319.51	11.379	11.6639	11.1418	11.5829	11.099	11.4654	10.525	10.6621	10.4809
tr|F6VG99|F6VG99_MOUSE	Lmo7	F6VG99_MOUSE Protein Lmo7 (Fragment)	48	5776.08	6241.92	6123.46	6795.52	5037.54	5616.33	6547.12	6244.67	6219.12	11.0486	10.7387	11.3872	10.9455	10.5022	11.3927	11.4891	11.0338	11.4621
sp|P61922|GABT_MOUSE	Abat	GABT_MOUSE 4-aminobutyrate aminotransferase, mitochondrial	48	4605.02	5627.26	5017.91	6089.25	4799.26	4677.59	4747.55	5334.31	5020.64	10.4699	11.5071	11.0912	11.6577	11.8924	11.278	9.90239	11.2029	10.9984
sp|Q8BFR5|EFTU_MOUSE	Tufm	EFTU_MOUSE Elongation factor Tu, mitochondrial	48	8724.72	9783.37	8169.49	10031	7426.55	7790.35	9063.41	8281.34	8330.7	11.7489	11.8494	10.6952	11.3744	10.8998	11.1251	11.1969	10.3012	10.8091
sp|Q6PB66|LPPRC_MOUSE	Lrpprc	LPPRC_MOUSE Leucine-rich PPR motif-containing protein, mitochondrial	48	7250.58	8335.01	7485.11	8893.49	6865.43	6569.07	7566.74	7589	7384.77	11.1497	11.5281	11.1902	11.5161	11.5066	10.7126	10.6749	10.78	10.9418
sp|Q8VEM8|MPCP_MOUSE	Slc25a3	MPCP_MOUSE Phosphate carrier protein, mitochondrial	47	6314.56	6919.61	6096.87	7284.58	5581.35	5922.13	6383.67	6294.41	5920.37	11.6209	11.4535	10.9081	11.2886	11.195	11.5578	10.7778	10.7002	10.498
sp|Q91WS0|CISD1_MOUSE	Cisd1	CISD1_MOUSE CDGSH iron-sulfur domain-containing protein 1	47	6553.63	7156.17	6624.38	7837.63	6103.88	6316.52	7682.02	7705.87	7011.79	10.8679	10.6735	10.6796	10.9443	11.0321	11.1082	11.6869	11.8039	11.2035
tr|B8QI35|B8QI35_MOUSE	Ppfia3	B8QI35_MOUSE Liprin-alpha 3	47	7254.36	8274.34	7852.03	8631.2	6830.73	6772.81	7914.96	7683.08	7343.93	11.0485	11.3344	11.626	11.0691	11.3385	10.9389	11.0589	10.8088	10.7769
sp|Q01097|NMDE2_MOUSE	Grin2b	NMDE2_MOUSE Glutamate receptor ionotropic, NMDA 2B	47	8554.74	9602.73	8860.2	9901.57	7953.87	7884.26	9521.4	9084.12	8872.33	11.1321	11.2389	11.2088	10.8496	11.2806	10.88	11.3666	10.9192	11.1242
tr|E9PX29|E9PX29_MOUSE	Sptbn4	E9PX29_MOUSE Protein Sptbn4	47	4940.11	5181.1	5356.16	5852.18	4492.32	4661.32	5996.08	5801.34	5579.87	10.7838	10.1723	11.3667	10.757	10.6879	10.7906	12.0078	11.6978	11.736
sp|Q8K310|MATR3_MOUSE	Matr3	MATR3_MOUSE Matrin-3	47	6305.83	6971.13	7164.99	8103.85	6437.2	5878.59	8057.84	8692	7782.27	10.0837	10.0263	11.1388	10.9121	11.2192	9.96897	11.8211	12.8392	11.9907
sp|Q60875|ARHG2_MOUSE	Arhgef2	ARHG2_MOUSE Rho guanine nucleotide exchange factor 2	46	5033.91	5700.95	5559.42	6343.16	4207.3	5452.66	5349.28	5129.36	5482.76	10.895	11.0977	11.6977	11.5603	9.92461	12.515	10.6213	10.2548	11.4336
sp|O35643|AP1B1_MOUSE	Ap1b1	AP1B1_MOUSE AP-1 complex subunit beta-1	46	7946.13	8670.35	8434.21	9375.56	6707.3	7724.35	7916.5	7600.02	7408.5	11.5561	11.341	11.9246	11.4813	10.6314	11.9129	10.5621	10.2096	10.3812
sp|P17183|ENOG_MOUSE	Eno2	ENOG_MOUSE Gamma-enolase	46	5070.03	6326.07	5100.42	5941.68	4614.83	5124.78	5740.77	5422.55	5395.89	10.8658	12.194	10.6268	10.7226	10.7794	11.6473	11.2871	10.7348	11.1423
sp|Q99PU5|ACBG1_MOUSE	Acsbg1	ACBG1_MOUSE Long-chain-fatty-acid--CoA ligase ACSBG1	46	5158.66	5730.83	5227.88	6174.62	4346.96	4932.19	5366.25	4904.71	5075.63	11.4874	11.4779	11.3177	11.578	10.5501	11.6473	10.9627	10.0888	10.8902
sp|P12382|K6PL_MOUSE	Pfkl	K6PL_MOUSE 6-phosphofructokinase, liver type	46	6393.49	7248.38	6569.41	7632.53	6342.41	6188.79	6398.76	6770	6551.3	11.0924	11.3107	11.0806	11.1506	11.9931	11.3866	10.1847	10.8497	10.9516
sp|Q9Z1B3|PLCB1_MOUSE	Plcb1	PLCB1_MOUSE 1-phosphatidylinositol 4,5-bisphosphate phosphodiesterase beta-1	46	5503.17	6048.31	6394.98	6805.42	4673.85	5537.94	6901.81	5767.35	6320.29	10.6637	10.5412	12.0471	11.1043	9.87091	11.38	12.2693	10.3232	11.8003
sp|P16054|KPCE_MOUSE	Prkce	KPCE_MOUSE Protein kinase C epsilon type	46	7227.02	8597.43	7527.03	9172.46	7168.47	7251.51	7551.52	8093.53	8007.45	10.6872	11.4349	10.8212	11.4217	11.5536	11.3719	10.2447	11.0556	11.4093
sp|P58281|OPA1_MOUSE	Opa1	OPA1_MOUSE Dynamin-like 120 kDa protein, mitochondrial	46	7041.1	7641.42	7348.04	8448.55	6427.31	6437.39	7517.26	6908.56	6796.42	11.3878	11.1157	11.5536	11.506	11.3297	11.0411	11.1538	10.3212	10.5911
sp|Q9D172|ES1_MOUSE	D10Jhu81e	ES1_MOUSE ES1 protein homolog, mitochondrial	46	7868.04	8612.2	6848.98	8749.97	6903.07	6640.56	7481.38	6883.5	6791.28	12.2993	12.1084	10.4084	11.5175	11.7609	11.0082	10.7289	9.93946	10.2288
tr|A2ALL9|A2ALL9_MOUSE	Atp2b3	A2ALL9_MOUSE Protein Atp2b3	46	6648.99	7526.8	6987.12	7929.47	6189.37	6182.07	7271.98	7072.69	6692.28	11.1107	11.3125	11.3509	11.1576	11.2725	10.9552	11.1481	10.9172	10.7751
sp|P63085|MK01_MOUSE	Mapk1	MK01_MOUSE Mitogen-activated protein kinase 1	46	10159.4	11280.6	10326.9	12106.1	9141.51	9224.87	11071.8	11147.3	9412.37	11.3123	11.2973	11.1789	11.3508	11.094	10.8929	11.31	11.4655	10.0982
sp|Q8CGC7|SYEP_MOUSE	Eprs	SYEP_MOUSE Bifunctional glutamate/proline--tRNA ligase	46	7690.49	7872.64	8347.29	8908.38	7117.8	6995.68	8833.77	8823.84	8149.96	11.0382	10.1631	11.6476	10.7667	11.1346	10.6481	11.6319	11.6988	11.271
tr|E9Q7G0|E9Q7G0_MOUSE	Numa1	E9Q7G0_MOUSE Protein Numa1	46	4281.41	4793.05	4941.74	5217.96	3907.48	4205.08	5740.26	5838.9	5498.16	10.082	10.1516	11.3132	10.3467	10.0287	10.5011	12.4009	12.7008	12.475
sp|P04264|K2C1_HUMAN_contaminant	KRT1	K2C1_HUMAN_contaminant Keratin, type II cytoskeletal 1	46	6368.82	5017.67	4002.81	8973.59	11517.8	4151.07	3409.21	2910.74	4792.57	12.8096	9.07698	7.8269	15.1979	25.2484	8.85398	6.29062	5.40782	9.2877
sp|Q9D0K2|SCOT1_MOUSE	Oxct1	SCOT1_MOUSE Succinyl-CoA:3-ketoacid coenzyme A transferase 1, mitochondrial	45	7310.83	8416.33	8064.15	9370.84	6692.47	7307.44	7854.32	7699.86	7139.25	10.9359	11.3233	11.7272	11.8034	10.9109	11.5919	10.7785	10.6393	10.2897
sp|Q60931|VDAC3_MOUSE	Vdac3	VDAC3_MOUSE Voltage-dependent anion-selective channel protein 3	45	5466.15	6222.63	4941.97	6354.97	4999.83	5016	5068.41	5416.3	4918.57	11.7857	12.0673	10.3591	11.5379	11.7495	11.4692	10.0256	10.7875	10.2182
sp|Q99PT1|GDIR1_MOUSE	Arhgdia	GDIR1_MOUSE Rho GDP-dissociation inhibitor 1	45	4451.07	4852.84	4202.49	4868.95	4029.01	4041.32	4344.44	4232.1	3943.72	11.9099	11.6788	10.9319	10.9703	11.7497	11.4674	10.6644	10.4602	10.1674
sp|P47857|K6PF_MOUSE	Pfkm	K6PF_MOUSE 6-phosphofructokinase, muscle type	45	6011.83	6660.21	6347.54	7299.75	4947.48	5702.67	6443.13	5856.07	6199.2	11.3317	11.2912	11.6317	11.5861	10.1639	11.399	11.1416	10.1962	11.2587
sp|P08551|NFL_MOUSE	Nefl	NFL_MOUSE Neurofilament light polypeptide	45	8702.46	8633.23	6897.85	8937.52	6709	6994.65	8137.73	6749.57	7173.43	13.1774	11.7577	10.1542	11.3957	11.0721	11.2319	11.3045	9.44068	10.4659
sp|Q8QZT1|THIL_MOUSE	Acat1	THIL_MOUSE Acetyl-CoA acetyltransferase, mitochondrial	45	9987.27	11370	9840.55	11824.6	9166.63	9229.27	10169.8	10156.7	9875.33	11.3825	11.655	10.9033	11.3479	11.3864	11.1547	10.6332	10.6926	10.8444
sp|Q6VNB8|WDFY3_MOUSE	Wdfy3	WDFY3_MOUSE WD repeat and FYVE domain-containing protein 3	45	6421.24	7183.95	7315.99	7784.45	6131	6109.66	7340.35	7208.83	6873.02	10.751	10.8182	11.9083	10.9749	11.1879	10.848	11.2748	11.149	11.0877
sp|P42932|TCPQ_MOUSE	Cct8	TCPQ_MOUSE T-complex protein 1 subunit theta	45	8766.26	9582.68	8362.11	9960.49	7426.45	7385.58	9397.67	8649.19	8295.85	11.7775	11.5794	10.922	11.2683	10.8744	10.5226	11.583	10.7338	10.7389
sp|P14211|CALR_MOUSE	Calr	CALR_MOUSE Calreticulin	45	7200.94	7808.56	6622.17	7956.37	6556.22	5581.48	6800.61	6720.69	6519.19	12.1731	11.8725	10.8832	11.3257	12.0796	10.006	10.5468	10.4946	10.6186
sp|O88342|WDR1_MOUSE	Wdr1	WDR1_MOUSE WD repeat-containing protein 1	44	5567.1	6042.11	5392.15	6224.11	4878.07	5343.28	5913.85	5659.52	5397.9	11.5209	11.2462	10.8484	10.8461	11.0025	11.7264	11.2276	10.8187	10.7632
sp|P05201|AATC_MOUSE	Got1	AATC_MOUSE Aspartate aminotransferase, cytoplasmic	44	6332.68	6912.63	5863.95	7374.55	5204.7	5837.15	5916.46	5937.55	5828.39	11.982	11.7638	10.7865	11.7494	10.7331	11.7123	10.2699	10.3774	10.6256
sp|P16125|LDHB_MOUSE	Ldhb	LDHB_MOUSE L-lactate dehydrogenase B chain	44	8257.08	8815.46	7690.95	9525.01	6360.6	7421.84	8304.31	7237.14	7606.01	12.1216	11.6397	10.9764	11.7744	10.177	11.5544	11.1841	9.81392	10.7585
sp|Q6PH08|ERC2_MOUSE	Erc2	ERC2_MOUSE ERC protein 2	44	7499.69	8317.27	7942.58	8866.78	6731.61	7208.25	8202.29	7702.6	7410.42	11.2054	11.177	11.537	11.1555	10.962	11.4213	11.243	10.6307	10.6681
sp|Q9ES97|RTN3_MOUSE	Rtn3	RTN3_MOUSE Reticulon-3	44	5659.13	6588.67	6100.35	6840.67	5063.12	5574.18	6568.1	6000.47	6110.28	10.8493	11.3608	11.3698	11.0431	10.5793	11.3327	11.5519	10.6262	11.2869
sp|A2AGT5|CKAP5_MOUSE	Ckap5	CKAP5_MOUSE Cytoskeleton-associated protein 5	44	6202.17	6670.28	7055.84	7277.97	5656.97	6136.77	7227.36	7107.02	6845.65	10.7575	10.4058	11.8977	10.6296	10.694	11.2878	11.5003	11.3867	11.4405
sp|Q80TE7|LRRC7_MOUSE	Lrrc7	LRRC7_MOUSE Leucine-rich repeat-containing protein 7	44	5577.14	6115.39	5723.8	6430.34	5045.65	5326.92	6225.99	6030.35	5817.65	11.1337	10.9802	11.1086	10.8094	10.9782	11.2773	11.4024	11.1201	11.1902
sp|P62806|H4_MOUSE	Hist1h4a	H4_MOUSE Histone H4	44	7208.99	7886.13	7596.86	9043.6	6526.04	7294.52	8726.66	9445.93	8173.76	10.4846	10.3158	10.7413	11.0754	10.3446	11.2506	11.6436	12.69	11.4541
sp|Q91XM9-4|DLG2_MOUSE	Dlg2	DLG2_MOUSE Isoform 4 of Disks large homolog 2	44	6132.18	6610	6119.58	7021.71	5579.92	5709.81	6791.46	6436.83	5955.54	11.3579	11.0114	11.0192	10.9513	11.2641	11.2151	11.54	11.0127	10.6283
sp|P51881|ADT2_MOUSE	Slc25a5	ADT2_MOUSE ADP/ATP translocase 2	44	5090.95	6031.42	5232.87	6484.72	5065.48	4972.9	5346.49	5681.28	5468.26	10.7678	11.4738	10.76	11.5493	11.6771	11.1541	10.3742	11.0998	11.1439
tr|F8VPN4|F8VPN4_MOUSE	Agl	F8VPN4_MOUSE Protein Agl	44	5114.6	5919.66	5186.23	6079.53	4716.88	4834.77	5437.3	5412.05	5324.69	11.1221	11.578	10.9641	11.1323	11.1793	11.1494	10.8472	10.8712	11.1565
sp|P58871|TB182_MOUSE	Tnks1bp1	TB182_MOUSE 182 kDa tankyrase-1-binding protein	44	4644.95	5159.52	5161.16	5700.98	4204.79	4641.91	5850.05	5623.37	5231.7	10.5063	10.4963	11.3491	10.8582	10.3657	11.1343	12.1392	11.7491	11.4018
sp|Q8K2B3|SDHA_MOUSE	Sdha	SDHA_MOUSE Succinate dehydrogenase [ubiquinone] flavoprotein subunit, mitochondrial	44	6105.79	7116.84	6183.68	7418.54	5776.36	5558.15	5841.98	6083.38	5974.15	11.3723	11.9221	11.1969	11.6349	11.7259	10.9783	9.9822	10.4662	10.7212
sp|P48453|PP2BB_MOUSE	Ppp3cb	PP2BB_MOUSE Serine/threonine-protein phosphatase 2B catalytic subunit beta isoform	43	5322.47	5628.65	5059.17	6056.51	4698.57	5366.01	5184.01	5230.38	5203.49	11.6171	11.0497	10.7352	11.1313	11.1773	12.4204	10.3804	10.5453	10.9431
sp|Q9CVB6|ARPC2_MOUSE	Arpc2	ARPC2_MOUSE Actin-related protein 2/3 complex subunit 2	43	9113.11	9523.31	8681.48	9834.33	7528.31	8172.7	9037.5	8831.88	8338.15	12.0297	11.3068	11.1411	10.9314	10.8311	11.4408	10.9446	10.7692	10.6053
sp|Q9QXL2|KI21A_MOUSE	Kif21a	KI21A_MOUSE Kinesin-like protein KIF21A	43	5639.49	6535.21	6572.73	6924.54	5136.68	5554.95	6661.45	6424.75	6178.85	10.5952	11.0431	12.005	10.9547	10.5181	11.0675	11.4815	11.1498	11.1851
sp|O70318|E41L2_MOUSE	Epb41l2	E41L2_MOUSE Band 4.1-like protein 2	43	7437.25	8619.72	7477.95	8744.02	6759.39	6874.93	7798.03	7744.72	7359.9	11.2891	11.768	11.0351	11.1763	11.1826	11.0666	10.8591	10.8591	10.7642
sp|Q5H8C4|VP13A_MOUSE	Vps13a	VP13A_MOUSE Vacuolar protein sorting-associated protein 13A	43	6921.19	7749.07	7379.39	8182.76	6526.52	6473	7550.61	7550.04	7074.18	11.0474	11.1247	11.451	10.9981	11.3539	10.9568	11.0566	11.1319	10.8797
sp|P53994|RAB2A_MOUSE	Rab2a	RAB2A_MOUSE Ras-related protein Rab-2A	43	7162.24	7566.26	6759.82	8093.85	6445.29	6243.86	7539.62	7110.95	6732.04	11.7466	11.1611	10.7782	11.1779	11.5211	10.8597	11.3442	10.7729	10.6383
sp|Q04690|NF1_MOUSE	Nf1	NF1_MOUSE Neurofibromin	43	6022.09	6880.51	6715.1	7484.92	5742.44	5719.64	6786.38	6740.86	6385.64	10.7593	11.0565	11.6637	11.2607	11.182	10.8369	11.1234	11.1248	10.9927
tr|E9Q0N0|E9Q0N0_MOUSE	Itsn1	E9Q0N0_MOUSE Intersectin-1	43	6542	7185.52	7378.47	8042.07	5773.57	6200.61	7863.45	7512.18	7038.1	10.7683	10.6379	11.8072	11.1466	10.3578	10.8236	11.8744	11.422	11.1623
sp|Q3UHJ0|AAK1_MOUSE	Aak1	AAK1_MOUSE AP2-associated protein kinase 1	43	5543.03	6250.84	5952.38	6640.56	5021.48	5079.26	6224.66	6000.67	6033.72	10.9828	11.1395	11.4658	11.0792	10.8439	10.6725	11.3147	10.9826	11.5189
sp|O54774|AP3D1_MOUSE	Ap3d1	AP3D1_MOUSE AP-3 complex subunit delta-1	43	6128.35	7135.58	6830.66	7824.74	6059.85	5822.95	7060.29	6961.03	6712.66	10.5788	11.0786	11.4631	11.3737	11.401	10.6595	11.1809	11.0996	11.1648
sp|P62761|VISL1_MOUSE	Vsnl1	VISL1_MOUSE Visinin-like protein 1	43	3822.24	4085.7	3997.95	4522.91	3494.88	3606.69	4938.88	4747.86	4296.1	10.6522	10.2412	10.8319	10.614	10.6155	10.6593	12.6273	12.2225	11.5361
sp|Q62277|SYPH_MOUSE	Syp	SYPH_MOUSE Synaptophysin	43	5591.89	6230.16	5855.21	7032.08	5729.46	4954.06	6269.91	6133.88	5436.26	10.9724	10.9952	11.1694	11.6189	12.253	10.3087	11.2866	11.1178	10.2779
sp|Q6P4T2|U520_MOUSE	Snrnp200	U520_MOUSE U5 small nuclear ribonucleoprotein 200 kDa helicase	43	6326.52	6384.9	7261.9	7152.14	5802.53	5600.96	7175.04	7735.6	6986.33	10.9314	9.92259	12.1985	10.406	10.9273	10.263	11.3735	12.3465	11.6311
sp|P10853|H2B1F_MOUSE	Hist1h2bf	H2B1F_MOUSE Histone H2B type 1-F/J/L	42	6940.46	7330.78	6617.68	8474.84	6371.32	7437.71	9150.71	8910.82	8096.33	10.4584	9.93549	9.69461	10.7535	10.4639	11.8855	12.6501	12.4033	11.7551
sp|Q9R1Q8|TAGL3_MOUSE	Tagln3	TAGL3_MOUSE Transgelin-3	42	5893.2	6130.85	5347.93	6551.31	5014.81	5330.58	5818.81	5746.52	5607.41	11.956	11.187	10.5479	11.1918	11.0885	11.4685	10.83	10.7691	10.9612
sp|P23818|GRIA1_MOUSE	Gria1	GRIA1_MOUSE Glutamate receptor 1	42	6430.62	7202.91	6316.49	7330.4	5770.25	6089.35	6762.17	6570.93	6509.44	11.3787	11.4633	10.8658	10.9222	11.1281	11.4265	10.9771	10.7401	11.098
sp|P23819-4|GRIA2_MOUSE	Gria2	GRIA2_MOUSE Isoform 4 of Glutamate receptor 2	42	5728.16	6524.48	5778.42	6669.1	5055.78	5302.47	5961.9	5452.84	5696.36	11.4659	11.7463	11.2447	11.2409	11.0298	11.2557	10.9481	10.0822	10.9863
sp|Q9D6J6|NDUV2_MOUSE	Ndufv2	NDUV2_MOUSE NADH dehydrogenase [ubiquinone] flavoprotein 2, mitochondrial	42	4637.92	5012.14	4343.27	5399.14	3999.71	4275.87	5130.48	4880	4791.94	11.4122	11.0925	10.3898	11.1869	10.7266	11.1576	11.5815	11.0919	11.361
sp|Q9CQA3|SDHB_MOUSE	Sdhb	SDHB_MOUSE Succinate dehydrogenase [ubiquinone] iron-sulfur subunit, mitochondrial	42	5585.28	6864.5	6034.95	7295.85	5506.65	5396.4	5238.11	6065	5846.19	10.8378	11.9803	11.3846	11.921	11.6459	11.1046	9.32466	10.871	10.9303
sp|Q810U4-3|NRCAM_MOUSE	Nrcam	NRCAM_MOUSE Isoform 3 of Neuronal cell adhesion molecule	42	5513.59	6037.38	5367.41	6328.12	4770.46	4989.89	5966.1	5400.37	5427.94	11.5654	11.3903	10.9456	11.1774	10.9062	11.0999	11.481	10.4638	10.9704
sp|Q6ZPE2|MTMR5_MOUSE	Sbf1	MTMR5_MOUSE Myotubularin-related protein 5	42	5093.29	5709.03	5678.49	6099.76	4926.85	4930.06	5803.12	5932.53	5675.67	10.6654	10.7523	11.56	10.7555	11.2443	10.9479	11.1481	11.4752	11.4514
sp|P20029|GRP78_MOUSE	Hspa5	GRP78_MOUSE 78 kDa glucose-regulated protein	42	5406.33	5874.02	5580.47	6370.51	4839.82	4948.84	6155.76	5547	5627.15	11.2176	10.9621	11.2568	11.1304	10.9449	10.8893	11.7176	10.6315	11.2498
sp|P59764|DOCK4_MOUSE	Dock4	DOCK4_MOUSE Dedicator of cytokinesis protein 4	42	5843.64	6552.15	6027.95	7059.52	5685.05	5432.09	6371.3	6355.68	6099.7	11.0068	11.0999	11.038	11.1967	11.6707	10.8503	11.0094	11.0581	11.07
sp|Q920I9|WDR7_MOUSE	Wdr7	WDR7_MOUSE WD repeat-containing protein 7	42	5820.72	6676.28	6216.66	7056.98	5482.35	5458.29	6651.83	6232.24	6231.11	10.8924	11.2368	11.3097	11.12	11.1815	10.8319	11.4196	10.7729	11.2351
sp|Q810U3|NFASC_MOUSE	Nfasc	NFASC_MOUSE Neurofascin	42	5670.7	6264.3	5707.15	6397.2	4994.93	4856.76	5843.69	5521.67	5401.54	11.692	11.6168	11.4398	11.1066	11.2246	10.6194	11.0536	10.5163	10.7308
sp|Q64511|TOP2B_MOUSE	Top2b	TOP2B_MOUSE DNA topoisomerase 2-beta	42	5368.66	5878.53	6706.05	6652.33	5357.73	5138.42	7233.4	7615.91	7058.4	9.84399	9.69472	11.9541	10.2711	10.7071	9.9916	12.1677	12.8994	12.4702
sp|Q9QYC0-2|ADDA_MOUSE	Add1	ADDA_MOUSE Isoform 2 of Alpha-adducin	41	3924.8	4769.54	4837.83	5823.2	3340.42	5168.04	5180.02	4995.53	5533.58	9.42533	10.3019	11.2947	11.7755	8.74313	13.1615	11.4123	11.0816	12.804
sp|Q60625|ICAM5_MOUSE	Icam5	ICAM5_MOUSE Intercellular adhesion molecule 5	41	4848.85	5583.61	5475.27	6022.21	4225.68	5097.52	5610.06	4926.65	5774.1	10.6481	11.0283	11.6892	11.136	10.1139	11.8712	11.3022	9.9937	12.2174
sp|Q9DB77|QCR2_MOUSE	Uqcrc2	QCR2_MOUSE Cytochrome b-c1 complex subunit 2, mitochondrial	41	6353.69	6966.52	6131.39	7357.04	5401.91	5814.46	6551.91	6063.57	5962.84	11.7257	11.5635	11.0006	11.4329	10.8654	11.3795	11.0928	10.3367	10.603
sp|P48722|HS74L_MOUSE	Hspa4l	HS74L_MOUSE Heat shock 70 kDa protein 4L	41	6549.6	7601.66	6560.9	7908.56	5653.26	6123.09	6722.52	6464.69	6574.51	11.3801	11.8796	11.0826	11.571	10.7058	11.2825	10.7158	10.3758	11.0067
sp|Q8CHG7|RPGF2_MOUSE	Rapgef2	RPGF2_MOUSE Rap guanine nucleotide exchange factor 2	41	4405.62	4871.66	4943.19	5430.42	3986.33	4303.01	4927.06	4811.29	4866.23	10.8175	10.7587	11.7998	11.2278	10.6679	11.2045	11.0986	10.9125	11.5126
sp|Q8BG39|SV2B_MOUSE	Sv2b	SV2B_MOUSE Synaptic vesicle glycoprotein 2B	41	4612.47	5169.62	4448.95	5361.39	4271.29	4151.59	4356.8	4464.28	4328.28	11.6917	11.7859	10.9634	11.4435	11.8002	11.1598	10.1315	10.4529	10.5711
sp|P70296|PEBP1_MOUSE	Pebp1	PEBP1_MOUSE Phosphatidylethanolamine-binding protein 1	41	5473.41	5707.15	4596.1	5822.06	4674.12	4526.82	5016.96	4874.72	4767.22	12.5621	11.781	10.2551	11.2517	11.692	11.0178	10.5634	10.3346	10.5422
sp|Q8BH59|CMC1_MOUSE	Slc25a12	CMC1_MOUSE Calcium-binding mitochondrial carrier protein Aralar1	41	7390.37	8098.22	7050.89	8397.62	6774.91	6648.08	7665.36	7640.63	7145.57	11.5458	11.3791	10.709	11.0472	11.5358	11.0142	10.9863	11.0263	10.7562
sp|Q7TMY8|HUWE1_MOUSE	Huwe1	HUWE1_MOUSE E3 ubiquitin-protein ligase HUWE1	41	5156.17	5873.58	5573	6386.96	5020.16	4978.13	5559.87	5941.31	5569.32	10.7553	11.0194	11.3014	11.2184	11.413	11.0119	10.6395	11.4477	11.1933
sp|Q3U1J4|DDB1_MOUSE	Ddb1	DDB1_MOUSE DNA damage-binding protein 1	41	6067.57	6690.27	6367.53	7302.42	5254.27	5518.18	6300.3	6185.56	6005.27	11.3875	11.2932	11.618	11.5404	10.7476	10.9827	10.8477	10.7234	10.8595
sp|Q5SWU9|ACACA_MOUSE	Acaca	ACACA_MOUSE Acetyl-CoA carboxylase 1	41	5470.78	6091.06	5819.72	6397.21	5415.27	5152.77	5965.82	6124.52	5625.03	10.9612	10.9764	11.3359	10.7929	11.8254	10.9484	10.9658	11.335	10.8591
sp|P70206|PLXA1_MOUSE	Plxna1	PLXA1_MOUSE Plexin-A1	41	5728.98	6422.86	6450.46	7063.67	5592.54	5387.88	6240.07	6080.02	5819.81	10.916	11.0072	11.9488	11.3333	11.614	10.8869	10.9078	10.7012	10.6846
sp|Q8VEK3|HNRPU_MOUSE	Hnrnpu	HNRPU_MOUSE Heterogeneous nuclear ribonucleoprotein U	41	5843.92	6053.99	6329	6716.11	5281.13	5324.1	6594.95	7065.77	6354.33	10.9851	10.2353	11.5659	10.6305	10.8196	10.6132	11.3729	12.2687	11.5088
tr|E9QM99|E9QM99_MOUSE	Dock10	E9QM99_MOUSE Dedicator of cytokinesis protein 10	41	6072.01	6469.23	6466.85	7016.92	5493.89	5500.8	6908.96	6960.82	6528.01	11.047	10.5858	11.438	10.7497	10.8938	10.613	11.5315	11.698	11.4433
sp|P80316|TCPE_MOUSE	Cct5	TCPE_MOUSE T-complex protein 1 subunit epsilon	41	9151.01	9943.25	8974.24	10628	8031.93	7853.4	10400.9	9390.06	9239.67	11.4432	11.1833	10.91	11.1911	10.9468	10.4145	11.932	10.8465	11.1326
sp|Q05793|PGBM_MOUSE	Hspg2	PGBM_MOUSE Basement membrane-specific heparan sulfate proteoglycan core protein	41	3128.41	4060.22	4645.99	3619.45	3379.32	3426.88	4675.42	5765.83	5301.57	8.59797	10.0365	12.4136	8.37634	10.1225	9.98784	11.7884	14.6378	14.0391
sp|Q9WTT4|VATG2_MOUSE	Atp6v1g2	VATG2_MOUSE V-type proton ATPase subunit G 2	40	2415.94	2577.48	2561.49	2953.21	2230.91	2552.53	2850.8	2793.22	2666.55	10.6832	10.2512	11.0117	10.9964	10.7519	11.9698	11.565	11.4094	11.3613
sp|Q9EQF6|DPYL5_MOUSE	Dpysl5	DPYL5_MOUSE Dihydropyrimidinase-related protein 5	40	4065.98	4716.66	4804.81	5321.1	3843.76	4212.12	4558.93	4406.96	4518.86	10.5001	10.9553	12.0628	11.5709	10.8186	11.5353	10.8007	10.5125	11.2439
sp|P07724|ALBU_MOUSE	Alb	ALBU_MOUSE Serum albumin	40	7941.69	8672.8	6900.69	8617.08	6314.27	7361.59	7822.81	9046.45	8484.58	11.6612	11.4538	9.85072	10.6544	10.1051	11.4631	10.5379	12.2701	12.0039
sp|P99024|TBB5_MOUSE	Tubb5	TBB5_MOUSE Tubulin beta-5 chain	40	3304.84	3408.32	3326.33	3706.12	2835.45	3075.38	3638.47	3337.98	3204.51	11.5612	10.724	11.3127	10.9172	10.8109	11.4091	11.6771	10.7864	10.8013
sp|Q99P72|RTN4_MOUSE	Rtn4	RTN4_MOUSE Reticulon-4	40	7538	8272.7	7338.06	8362.89	6543.16	6884.22	7950.24	7234.36	7155.2	11.6947	11.5436	11.0677	10.9251	11.0638	11.3263	11.3155	10.3675	10.6958
sp|Q91ZA3|PCCA_MOUSE	Pcca	PCCA_MOUSE Propionyl-CoA carboxylase alpha chain, mitochondrial	40	5234.93	5758.44	4840.75	6031.48	4561.57	4771.45	5356.59	5170.9	4984.89	11.7049	11.5803	10.5224	11.3558	11.1162	11.3137	10.9877	10.6798	10.7392
tr|B2M1R6|B2M1R6_MOUSE	Hnrnpk	B2M1R6_MOUSE Heterogeneous nuclear ribonucleoprotein K	40	6050.69	6040.28	5964.42	6719.97	5240.39	5384.13	6140.94	6344.12	5421	11.8458	10.636	11.352	11.0781	11.1817	11.1783	11.0295	11.4728	10.2259
sp|Q8K0T0|RTN1_MOUSE	Rtn1	RTN1_MOUSE Reticulon-1	40	7230.74	8262.68	7133.69	8459.99	6650.79	6328.42	7407.56	7068.44	6750.02	11.5673	11.8887	11.0946	11.3962	11.5961	10.7361	10.8714	10.4452	10.4044
sp|Q9WTS5|TEN2_MOUSE	Tenm2	TEN2_MOUSE Teneurin-2	40	5666.11	6477.71	6075.74	6993.29	5427.91	5103.35	5905.74	5901.99	5475.03	11.1624	11.4777	11.6364	11.601	11.6545	10.6618	10.6735	10.7402	10.3925
sp|Q64436|ATP4A_MOUSE	Atp4a	ATP4A_MOUSE Potassium-transporting ATPase alpha chain 1	40	8964.28	9911.69	9208.65	10364.3	8493.29	8031.24	10171.6	9329.48	9299.29	11.1716	11.1098	11.1568	10.8762	11.5362	10.6141	11.6292	10.7398	11.1663
sp|Q99PL5|RRBP1_MOUSE	Rrbp1	RRBP1_MOUSE Ribosome-binding protein 1	40	4634.34	5190.55	5374.1	5558.05	4515.54	4519.16	6151.74	6372.57	5862.62	10.0527	10.1267	11.3331	10.1521	10.6756	10.3957	12.2421	12.7688	12.2532
sp|P70704|AT8A1_MOUSE	Atp8a1	AT8A1_MOUSE Probable phospholipid-transporting ATPase IA	40	5074.89	5846.32	5835.83	6364.19	4989.14	4566.82	6037.53	5766.27	5682.75	10.5755	10.9577	11.8229	11.1676	11.3315	10.0923	11.5424	11.0997	11.4103
sp|Q80YA9|CNKR2_MOUSE	Cnksr2	CNKR2_MOUSE Connector enhancer of kinase suppressor of ras 2	39	3341.43	3834.92	3582.69	4163.87	2963.09	3620.81	4369.38	4120.15	3891.63	10.3089	10.6413	10.7457	10.8172	9.96348	11.8464	12.3669	11.7418	11.5684
sp|P40124|CAP1_MOUSE	Cap1	CAP1_MOUSE Adenylyl cyclase-associated protein 1	39	7148.06	8003.37	7035.49	8453.07	6049.79	6735.3	6963.51	6715.37	7143.77	11.62	11.7018	11.1188	11.571	10.7188	11.6112	10.385	10.0839	11.1894
tr|Q6PGJ3|Q6PGJ3_MOUSE	L1cam	Q6PGJ3_MOUSE L1 cell adhesion molecule	39	6646.05	7805.4	7067.04	7987.85	5636.85	6353.54	7413.61	6533.49	6554.56	11.2082	11.8394	11.5866	11.3434	10.3609	11.3629	11.47	10.1779	10.6507
sp|Q9CWZ7|SNAG_MOUSE	Napg	SNAG_MOUSE Gamma-soluble NSF attachment protein	39	6540.99	7144.19	5891.48	7410.25	5533.67	5849.5	6792.54	6257.28	6201.9	11.8592	11.65	10.3844	11.3131	10.9348	11.2468	11.2981	10.4794	10.8342
sp|P06837|NEUM_MOUSE	Gap43	NEUM_MOUSE Neuromodulin	39	7254.26	9065.03	9319.82	9542.89	6427.38	7852.96	10430.4	8730.17	8957.87	9.78969	11.0029	12.2273	10.8441	9.45359	11.2385	12.9133	10.8828	11.6478
sp|B0V2N1|PTPRS_MOUSE	Ptprs	PTPRS_MOUSE Receptor-type tyrosine-protein phosphatase S	39	4133.93	4694.72	4309.25	5025.01	3896	3900.23	4249.81	4141.29	4230.35	11.185	11.4246	11.3349	11.4485	11.4889	11.1908	10.5488	10.3502	11.0283
sp|Q62417|SRBS1_MOUSE	Sorbs1	SRBS1_MOUSE Sorbin and SH3 domain-containing protein 1	39	5279.82	5918.42	5601.45	6318.91	4682.95	5055.81	6194.17	5660.28	5626.24	10.9615	11.0514	11.3057	11.0467	10.5964	11.1312	11.7976	10.855	11.2546
sp|Q91WD5|NDUS2_MOUSE	Ndufs2	NDUS2_MOUSE NADH dehydrogenase [ubiquinone] iron-sulfur protein 2, mitochondrial	39	5166.58	5638.74	4981.93	5915.06	4575.1	4646.57	5328.25	5197.24	4941.99	11.6294	11.4155	10.9018	11.2112	11.2238	11.0914	11.0027	10.8061	10.7181
sp|Q99NE5|RIMS1_MOUSE	Rims1	RIMS1_MOUSE Regulating synaptic membrane exocytosis protein 1	39	4227.91	4723.17	4667.12	5161.43	3883.41	4130.6	5029.27	4762.18	4712.18	10.6967	10.7477	11.4794	10.9959	10.7084	11.0825	11.6732	11.1293	11.487
sp|P27546|MAP4_MOUSE	Map4	MAP4_MOUSE Microtubule-associated protein 4	39	6578.03	7351.09	6900.92	7664.65	5708.84	6155.26	7720.76	7209.94	7482.38	10.9534	11.0094	11.1714	10.7469	10.3607	10.8692	11.7943	11.0898	12.0048
sp|O54988-2|SLK_MOUSE	Slk	SLK_MOUSE Isoform 2 of STE20-like serine/threonine-protein kinase	39	5320.93	5886.12	6129.72	6529.62	4601.2	4856.05	6133.96	5699.06	5538.88	10.9788	10.9234	12.2957	11.3447	10.3472	10.6255	11.611	10.862	11.0116
sp|Q9QYG0|NDRG2_MOUSE	Ndrg2	NDRG2_MOUSE Protein NDRG2	39	6471.75	6977.99	5944.93	7282.77	5667.98	5354.94	6199.06	6203.44	5765.67	12.0992	11.7335	10.8051	11.465	11.5492	10.6168	10.6322	10.713	10.386
sp|B2RSH2|GNAI1_MOUSE	Gnai1	GNAI1_MOUSE Guanine nucleotide-binding protein G(i) subunit alpha-1	38	7672.27	8255.45	7393.96	8985.64	6816.82	8266.72	7864.67	7860.24	8014.35	11.2421	10.8799	10.5328	11.0869	10.8866	12.8456	10.5722	10.639	11.3149
sp|Q9JI18|LRP1B_MOUSE	Lrp1b	LRP1B_MOUSE Low-density lipoprotein receptor-related protein 1B	38	3713.49	4235.68	4218.59	4637.71	3310.49	3743.18	3941.44	3956.41	3888.94	10.8821	11.1639	12.0183	11.4439	10.5733	11.6324	10.5961	10.7096	10.9805
sp|P16330|CN37_MOUSE	Cnp	CN37_MOUSE 2',3'-cyclic-nucleotide 3'-phosphodiesterase	38	9292.23	8913.52	7326.98	10193.7	7423.47	8046.3	9608.91	8476.13	8688.13	12.4468	10.7386	9.54131	11.4976	10.8375	11.4297	11.8079	10.4876	11.2131
sp|Q7TT50|MRCKB_MOUSE	Cdc42bpb	MRCKB_MOUSE Serine/threonine-protein kinase MRCK beta	38	6058.19	6697.01	6815.24	7450	5511.68	6095.84	7083.95	6687.78	6702.93	10.706	10.6445	11.7087	11.0861	10.6158	11.424	11.4847	10.9171	11.4132
sp|Q9WUM5|SUCA_MOUSE	Suclg1	SUCA_MOUSE Succinyl-CoA ligase [ADP/GDP-forming] subunit alpha, mitochondrial	38	7859.94	8933.96	7827.49	9549.52	7336.53	7558.31	7978.5	8294.34	7962.31	11.1948	11.4446	10.8384	11.453	11.3887	11.4162	10.4251	10.9124	10.9269
sp|O35927|CTND2_MOUSE	Ctnnd2	CTND2_MOUSE Catenin delta-2	38	4516.66	5157.01	4809.9	5279.34	4120.6	4421.01	5036.92	4993.48	4694.85	10.9593	11.2545	11.3461	10.7866	10.8972	11.3759	11.2122	11.1921	10.9761
sp|P53810|PIPNA_MOUSE	Pitpna	PIPNA_MOUSE Phosphatidylinositol transfer protein alpha isoform	38	6397.91	6934.74	5942.74	7157.02	5531.74	5697.21	6323.25	5946.6	5785.3	11.986	11.685	10.8235	11.2904	11.295	11.3188	10.8677	10.2907	10.443
sp|Q80U49|C170B_MOUSE	Cep170b	C170B_MOUSE Centrosomal protein of 170 kDa protein B	38	3539.76	3861.48	3759.85	4177.92	3306.52	3496.22	4163.11	4128.52	3883.04	10.7684	10.5655	11.1197	10.7023	10.9631	11.2791	11.6186	11.6014	11.3818
sp|Q9D6F9|TBB4A_MOUSE	Tubb4a	TBB4A_MOUSE Tubulin beta-4A chain	38	5131.74	5614.71	4826.54	5655.5	4575.8	4622.23	5304.46	4959.8	4786.17	11.7742	11.5866	10.7659	10.9264	11.4425	11.2466	11.1653	10.5117	10.5808
sp|Q6P5U7|NWD2_MOUSE	Nwd2	NWD2_MOUSE NACHT and WD repeat domain-containing protein 2	38	5555.04	6332.46	5642.21	6458.42	5023.4	5074.36	5702.12	5659.27	5364.1	11.4166	11.7053	11.2732	11.1768	11.2521	11.0594	10.751	10.7436	10.622
sp|Q8BRT1|CLAP2_MOUSE	Clasp2	CLAP2_MOUSE CLIP-associating protein 2	38	6124.79	6775.92	6745.13	7478.65	5436.46	5867.55	7235.86	6795.97	6875.09	10.7903	10.7368	11.5526	11.0945	10.4387	10.9623	11.6949	11.0595	11.6704
sp|Q61699|HS105_MOUSE	Hsph1	HS105_MOUSE Heat shock protein 105 kDa	38	6324.29	7052.39	6254.44	7145.99	5492.27	5478.82	6279.49	5673.77	5843.79	11.8892	11.9244	11.4308	11.3121	11.2533	10.9226	10.8299	9.85264	10.5851
sp|Q8VDJ3|VIGLN_MOUSE	Hdlbp	VIGLN_MOUSE Vigilin	38	5855.17	6293.05	6423.83	6981.19	5305.84	5563.59	7368.8	6902.28	6517.97	10.6967	10.3403	11.4091	10.7394	10.5646	10.7787	12.3501	11.6478	11.4732
sp|Q80XI3-2|IF4G3_MOUSE	Eif4g3	IF4G3_MOUSE Isoform 2 of Eukaryotic translation initiation factor 4 gamma 3	38	5270.95	5715.38	5950.72	6367.85	4628.76	4995.48	6950.08	6384.6	6255.3	10.4995	10.2397	11.5238	10.681	10.0492	10.5525	12.7008	11.7477	12.0058
sp|Q8CIE6|COPA_MOUSE	Copa	COPA_MOUSE Coatomer subunit alpha	38	7209.49	7936.41	7902.07	8619.49	6776.27	6417.87	8428.07	8520.78	7791.53	10.8268	10.7196	11.5367	10.8997	11.091	10.2208	11.6114	11.8199	11.274
tr|E9QNN1|E9QNN1_MOUSE	Dhx9	E9QNN1_MOUSE ATP-dependent RNA helicase A	38	4452.74	4952.09	4991.68	5460.28	4221.56	3976.62	4932.58	5531.48	5047.36	10.6848	10.6878	11.6448	11.033	11.0408	10.1194	10.8586	12.2609	11.6699
tr|E9PVZ8|E9PVZ8_MOUSE	Golgb1	E9PVZ8_MOUSE Protein Golgb1	38	3203.27	3436.63	3760.8	3928.89	3139.13	2980.04	4128.2	4267.02	3940.48	10.2126	9.85455	11.6565	10.5476	10.9079	10.0755	12.0744	12.5663	12.1047
sp|P12023|A4_MOUSE	App	A4_MOUSE Amyloid beta A4 protein	37	4993.61	5671.48	5382.51	5952.97	4440.5	5154.58	5912.17	5532.08	5509.06	10.7417	10.9727	11.2561	10.7828	10.4106	11.7585	11.6672	10.9923	11.4182
sp|Q6URW6|MYH14_MOUSE	Myh14	MYH14_MOUSE Myosin-14	37	3287.62	3656.9	3515.77	3898.26	3181.55	3393.84	3762.79	4012.23	3765.15	10.561	10.5657	10.9797	10.5447	11.1391	11.5615	11.089	11.9056	11.6538
sp|Q9CYT6|CAP2_MOUSE	Cap2	CAP2_MOUSE Adenylyl cyclase-associated protein 2	37	5385.95	5921.05	4984.37	5931.92	4703.74	5000.88	5474.98	5323.26	5183.62	11.7299	11.5982	10.5533	10.8784	11.1651	11.5499	10.9389	10.709	10.8774
sp|Q3UHD9|AGAP2_MOUSE	Agap2	AGAP2_MOUSE Arf-GAP with GTPase, ANK repeat and PH domain-containing protein 2	37	4240.39	4689.77	4598.74	5108.01	3912.66	4284.2	5023.7	4728.9	4891.36	10.6735	10.6173	11.2535	10.8266	10.734	11.436	11.6008	10.9952	11.863
sp|P11881|ITPR1_MOUSE	Itpr1	ITPR1_MOUSE Inositol 1,4,5-trisphosphate receptor type 1	37	5848.63	6834.03	6439.98	6598.62	4850.74	5662.75	6243.83	6449.38	6058.43	11.1133	11.6795	11.8965	10.558	10.0457	11.4108	10.8843	11.32	11.092
sp|Q9CS84|NRX1A_MOUSE	Nrxn1	NRX1A_MOUSE Neurexin-1	37	5084.12	5935.36	5278.88	6098.89	4665.88	4896.19	5539.42	5213.43	5079.74	11.1104	11.6661	11.2151	11.2229	11.1131	11.3468	11.1056	10.524	10.6959
tr|G3X9J0|G3X9J0_MOUSE	Sipa1l3	G3X9J0_MOUSE MCG122846	37	3846.41	4200.17	4102.9	4532.62	3602.13	3793.63	4374.51	4354.91	4294.12	10.8191	10.6259	11.2195	10.7356	11.0429	11.316	11.2883	11.315	11.6378
sp|P42859|HD_MOUSE	Htt	HD_MOUSE Huntingtin	37	4358.21	4805.27	4725.12	5245.31	3916.54	4294.91	4982.76	4937.68	4817.88	10.8176	10.7275	11.402	10.9631	10.5952	11.3051	11.3462	11.321	11.5223
sp|Q9Z140|CPNE6_MOUSE	Cpne6	CPNE6_MOUSE Copine-6	37	5191.86	5969.33	5413.43	6179.6	4700.7	4897.57	5453.7	5350.52	5091.64	11.2388	11.6221	11.3924	11.2641	11.0904	11.2429	10.8305	10.6988	10.6198
sp|P48678|LMNA_MOUSE	Lmna	LMNA_MOUSE Prelamin-A/C	37	5631.49	6620.59	5511.58	6483.12	4979.96	5294.8	5969.25	6064.6	5714.03	11.2562	11.9022	10.7101	10.9117	10.8488	11.2233	10.9459	11.1973	11.0046
sp|Q5DU25|IQEC2_MOUSE	Iqsec2	IQEC2_MOUSE IQ motif and SEC7 domain-containing protein 2	37	3227.21	3491.27	3504.43	3851.55	2868.83	3150.38	3778.69	3606.41	3648.72	10.8301	10.5378	11.4332	10.8838	10.4929	11.2116	11.6334	11.1794	11.7979
sp|Q9Z1G3|VATC1_MOUSE	Atp6v1c1	VATC1_MOUSE V-type proton ATPase subunit C 1	37	6245.19	6926.14	6340.15	7486.98	5378.79	5734.36	6675.55	6183.78	5915.25	11.4755	11.4466	11.3258	11.5843	10.772	11.174	11.2531	10.4959	10.4727
sp|Q812A2|SRGP3_MOUSE	Srgap3	SRGP3_MOUSE SLIT-ROBO Rho GTPase-activating protein 3	37	4770.85	5283.33	5246.71	5846.92	4265.41	4592.88	5546.54	5139.6	5052.11	10.8998	10.8565	11.6535	11.2483	10.6211	11.1277	11.6253	10.8465	11.1213
sp|P97807|FUMH_MOUSE	Fh	FUMH_MOUSE Fumarate hydratase, mitochondrial	37	6709.92	7214.72	6251.48	7544.01	5494.77	5840.22	6846.5	6185.44	6275.53	12.0137	11.6182	10.8815	11.3737	10.7225	11.0889	11.2457	10.2299	10.8261
sp|Q9EQ20|MMSA_MOUSE	Aldh6a1	MMSA_MOUSE Methylmalonate-semialdehyde dehydrogenase [acylating], mitochondrial	37	3912.76	4507.75	3721.03	4681.43	3497.82	3505.65	3898.22	3911.58	3751.59	11.5554	11.9736	10.6835	11.6418	11.2587	10.9792	10.5616	10.6708	10.6753
sp|Q9JLC8|SACS_MOUSE	Sacs	SACS_MOUSE Sacsin	37	4339.1	4677.53	4770.61	5026.03	4003.86	4063.48	4808.54	4701.74	4593.65	11.0495	10.7132	11.8103	10.7772	11.1124	10.9734	11.2335	11.0596	11.271
sp|P61982|1433G_MOUSE	Ywhag	1433G_MOUSE 14-3-3 protein gamma	37	7258.9	8016.89	7006.26	8811.51	6358.51	6794.78	8785.75	7960.23	8102.39	10.989	10.9157	10.3114	11.2325	10.4913	10.9084	12.2019	11.1315	11.8184
sp|Q11011|PSA_MOUSE	Npepps	PSA_MOUSE Puromycin-sensitive aminopeptidase	37	7975.07	9139.12	8051.5	9255.29	7095.23	7269.35	8861.12	8283.46	8265.98	11.232	11.5768	11.0241	10.9762	10.8912	10.8572	11.4491	10.7764	11.217
sp|O54983|CRYM_MOUSE	Crym	CRYM_MOUSE Ketimine reductase mu-crystallin	37	7184.08	8356.08	7195.2	9398.77	6585.53	6453.36	7663.28	6753.15	6670.76	11.3446	11.8681	11.0461	12.4977	11.3343	10.807	11.1018	9.85067	10.1497
sp|Q6A065|CE170_MOUSE	Cep170	CE170_MOUSE Centrosomal protein of 170 kDa	37	6138.83	6815.02	6982.98	7468.49	5627.12	5809.21	7513.47	7047.78	6722.66	10.6725	10.6564	11.8023	10.9334	10.6624	10.7102	11.9835	11.3181	11.2612
sp|Q9Z0J4|NOS1_MOUSE	Nos1	NOS1_MOUSE Nitric oxide synthase, brain	37	4903.06	5405.2	5292.36	5749.24	4731.52	4445.73	5315.48	5127.2	5180.57	11.0863	10.9923	11.6336	10.9463	11.6602	10.6601	11.0261	10.7087	11.2864
sp|Q70FJ1|AKAP9_MOUSE	Akap9	AKAP9_MOUSE A-kinase anchor protein 9	37	3351.98	3564.61	3695.74	3964.9	3182.61	3235.53	4140.44	4321.35	4168.96	10.411	9.95778	11.1593	10.3696	10.7736	10.657	11.7977	12.398	12.4761
sp|Q80UG2|PLXA4_MOUSE	Plxna4	PLXA4_MOUSE Plexin-A4	37	4665.74	5282.12	5474.88	5791.17	4611.29	4433.32	5399.63	5369.68	5361.86	10.503	10.6946	11.9816	10.9774	11.3136	10.5833	11.1511	11.1656	11.6297
sp|F6ZDS4|TPR_MOUSE	Tpr	TPR_MOUSE Nucleoprotein TPR	37	5938.14	6368.85	6600.49	6888.77	5384.33	5231.86	7692.52	7559.33	7018.37	10.5844	10.2103	11.4377	10.3394	10.4601	9.88944	12.579	12.4463	12.0535
sp|O88569|ROA2_MOUSE	Hnrnpa2b1	ROA2_MOUSE Heterogeneous nuclear ribonucleoproteins A2/B1	36	6266.65	4602.51	5459.84	5115.59	5613.1	6026.65	4419.15	6993.2	4458.69	13.2374	8.74425	11.2123	9.09917	12.9228	13.5003	8.5638	13.6453	9.07477
sp|Q7TQI3|OTUB1_MOUSE	Otub1	OTUB1_MOUSE Ubiquitin thioesterase OTUB1	36	3871.4	4364.28	3924.08	4721.6	3583.93	4004.65	3740.63	4654.92	4413.62	10.8368	10.9877	10.6787	11.1291	10.934	11.8877	9.60592	12.0361	11.9039
sp|P55066|NCAN_MOUSE	Ncan	NCAN_MOUSE Neurocan core protein	36	3363.05	3952.72	3659.8	4136.89	3159.19	3454.07	3493.13	3503.17	3600.75	10.857	11.4772	11.4863	11.2458	11.1158	11.8252	10.3456	10.4467	11.2004
sp|P70404|IDHG1_MOUSE	Idh3g	IDHG1_MOUSE Isocitrate dehydrogenase [NAD] subunit gamma 1, mitochondrial	36	4811.73	5566.96	4986.31	5994.79	4567.26	4896.01	4912.19	5255.16	5064.37	10.9049	11.3474	10.9861	11.4402	11.2814	11.7669	10.213	11.0013	11.0588
sp|Q0KL02|TRIO_MOUSE	Trio	TRIO_MOUSE Triple functional domain protein	36	5156.09	5813.5	5778.99	6147.55	4894.94	5343.21	5802.63	6023.64	5771.16	10.6029	10.7523	11.5532	10.645	10.9708	11.6521	10.9469	11.442	11.4348
sp|Q9JI91|ACTN2_MOUSE	Actn2	ACTN2_MOUSE Alpha-actinin-2	36	6041.37	6558.12	6160.8	7547.77	5380.28	5837.92	6795.95	5929.82	6008.95	11.2206	10.9552	11.1241	11.8043	10.8911	11.4985	11.5796	10.1733	10.7533
sp|Q9Z2Q6|SEPT5_MOUSE	2017-09-05	SEPT5_MOUSE Septin-5	36	5006.58	6586.88	5522.56	6824.47	5036.25	5098.86	5008.14	5671.8	5304.04	10.455	12.3716	11.2117	12.0003	11.4625	11.2916	9.59448	10.9407	10.6722
sp|P68369|TBA1A_MOUSE	Tuba1a	TBA1A_MOUSE Tubulin alpha-1A chain	36	2950.61	4953.14	3791.01	4789.42	3029.21	3613.58	4087.66	3387.27	5210.92	8.63826	13.0424	10.7899	11.8069	9.66564	11.219	10.9787	9.16021	14.6991
tr|E9Q912|E9Q912_MOUSE	Rap1gds1	E9Q912_MOUSE Protein Rap1gds1	36	6067	6879.3	5892.41	6847.2	5315.83	5384.01	6203.13	5844.94	5491.2	11.7503	11.9834	11.0947	11.1668	11.2211	11.0581	11.0217	10.4567	10.2472
sp|Q9QZQ1|AFAD_MOUSE	Mllt4	AFAD_MOUSE Afadin	36	4827.23	5353.38	5398.47	5891.45	4414.7	4661.36	5898.78	5457.45	5438.72	10.6563	10.6291	11.5858	10.9514	10.6218	10.9124	11.9463	11.1286	11.5682
sp|Q9DBP5|KCY_MOUSE	Cmpk1	KCY_MOUSE UMP-CMP kinase	36	4195.9	4579.03	3823.37	4697.68	3628.05	3568.28	4098.8	3959.37	3720	12.0824	11.8594	10.7034	11.3908	11.3865	10.8965	10.828	10.5317	10.3213
sp|Q8BGQ7|SYAC_MOUSE	Aars	SYAC_MOUSE Alanine--tRNA ligase, cytoplasmic	36	5411.31	5987.76	5601.8	6424.34	4586.79	4781.22	5695.34	5457.53	5253.13	11.5013	11.4464	11.5749	11.4977	10.6253	10.7766	11.1052	10.7147	10.7578
sp|Q9WU78|PDC6I_MOUSE	Pdcd6ip	PDC6I_MOUSE Programmed cell death 6-interacting protein	36	6442.74	7217.15	6562.52	7478.24	5645.41	5720.66	6973.46	6705.22	6524.49	11.3612	11.4467	11.2505	11.1043	10.8502	10.6979	11.2814	10.9221	11.0857
tr|H3BJZ7|H3BJZ7_MOUSE	Unc13a	H3BJZ7_MOUSE Protein unc-13 homolog A	36	5555.21	6497.25	6059.28	6829.09	5454.61	5022.91	5717.2	5748.94	5684.32	11.0345	11.6076	11.7009	11.4223	11.8087	10.5805	10.4183	10.5482	10.8791
tr|F7AAP4|F7AAP4_MOUSE	Atp2b4	F7AAP4_MOUSE Protein Atp2b4	36	4552.63	5680.69	5275.02	5895.06	4625.53	4378.78	5241.54	5499.97	4966.87	10.3202	11.5821	11.6251	11.2526	11.4281	10.5264	10.9005	11.5167	10.8485
tr|F8VQJ3|F8VQJ3_MOUSE	Lamc1	F8VQJ3_MOUSE Laminin subunit gamma-1	36	3514.32	4678.22	4320.95	4048.37	3342.16	3616	4872.75	5035.57	5279.39	9.49366	11.3667	11.348	9.20899	9.84026	10.3591	12.0761	12.5656	13.7416
sp|P47708|RP3A_MOUSE	Rph3a	RP3A_MOUSE Rabphilin-3A	35	4680.02	5642.09	5241.58	6088.74	4522.7	5120.66	4800.82	5305.72	5295.04	10.4595	11.3413	11.3886	11.4586	11.0166	12.1364	9.84328	10.9534	11.4023
sp|Q7TPD3|ROBO2_MOUSE	Robo2	ROBO2_MOUSE Roundabout homolog 2	35	3088.95	3527.98	3351.58	3699.19	2747.28	3214.85	3326.26	3344.93	3251.73	10.9099	11.2072	11.5082	11.0016	10.5755	12.0412	10.7777	10.9128	11.0659
sp|Q8C1B7|SEP11_MOUSE	2017-09-11	SEP11_MOUSE Septin-11	35	6344.24	7093.24	6254.77	7401.21	5701.38	6220.73	6496.77	6274.62	6076.96	11.4394	11.5035	10.9644	11.2374	11.2045	11.8951	10.7469	10.4509	10.5578
sp|O89053|COR1A_MOUSE	Coro1a	COR1A_MOUSE Coronin-1A	35	6727.33	7621.2	6881.28	8070.8	5980.59	6540.6	6975.64	7017.49	6720.71	11.2348	11.4474	11.1722	11.3495	10.8856	11.5835	10.6873	10.8254	10.8143
sp|Q91W50|CSDE1_MOUSE	Csde1	CSDE1_MOUSE Cold shock domain-containing protein E1	35	6023.66	6378.47	6274.02	6915.36	5159.85	5801.36	6698.61	6123.56	6129.02	11.3298	10.7905	11.4724	10.9526	10.5776	11.5716	11.5587	10.6392	11.1075
sp|Q64487|PTPRD_MOUSE	Ptprd	PTPRD_MOUSE Receptor-type tyrosine-protein phosphatase delta	35	4336.66	4829.18	4243.33	4986.61	3761.97	4082.49	4405.09	4181.79	4243.02	11.5872	11.6054	11.0224	11.2194	10.9553	11.5678	10.7979	10.3211	10.9235
sp|O08539|BIN1_MOUSE	Bin1	BIN1_MOUSE Myc box-dependent-interacting protein 1	35	4659.03	5083.45	4565.19	5482.42	3939.81	4473.71	5247.79	4713.46	4728.22	11.3502	11.1385	10.8121	11.2465	10.4609	11.5578	11.7286	10.6069	11.0985
sp|Q05920|PYC_MOUSE	Pc	PYC_MOUSE Pyruvate carboxylase, mitochondrial	35	5227.57	5865.22	5480.31	6315.85	4412.87	4933.46	5194.58	4988.12	5044.76	11.5083	11.6133	11.7291	11.708	10.5881	11.5176	10.4912	10.1435	10.7007
sp|Q99LC3|NDUAA_MOUSE	Ndufa10	NDUAA_MOUSE NADH dehydrogenase [ubiquinone] 1 alpha subcomplex subunit 10, mitochondrial	35	4680.35	5357.28	4414.77	5678.64	4258.76	4281.51	4419.66	4593.69	4422.07	11.61	11.9525	10.6465	11.8614	11.5139	11.2629	10.0578	10.5258	10.5692
sp|P12658|CALB1_MOUSE	Calb1	CALB1_MOUSE Calbindin	35	5113.55	5539.55	4584.44	5800.62	4234.63	4627.95	5440.58	5397.44	4840.75	11.7279	11.427	10.2219	11.2024	10.5852	11.2561	11.4473	11.4348	10.6973
sp|P28740|KIF2A_MOUSE	Kif2a	KIF2A_MOUSE Kinesin-like protein KIF2A	35	5796.64	6436.45	6334.24	7050.83	5332.9	5562.46	6272.07	6130.22	6012.34	11.0199	11.0054	11.7069	11.287	11.0497	11.2142	10.9389	10.7651	11.013
sp|P47757|CAPZB_MOUSE	Capzb	CAPZB_MOUSE F-actin-capping protein subunit beta	35	4513.54	4903.19	4437.68	5089.29	4191.83	4097.07	4699.86	4421.1	4412.45	11.5484	11.2835	11.0384	10.9648	11.6895	11.1167	11.0319	10.449	10.8779
tr|E9Q2E4|E9Q2E4_MOUSE	Gm15800	E9Q2E4_MOUSE Protein Gm15800	35	3323.35	3658.41	3683.09	3997.82	3008.56	3189.95	3805.65	3741.25	3643.37	10.8322	10.7249	11.6707	10.9724	10.6877	11.0262	11.3797	11.2641	11.4421
sp|Q91YM2|RHG35_MOUSE	Arhgap35	RHG35_MOUSE Rho GTPase-activating protein 35	35	5086.63	5778.68	5837.49	6297.65	4800.69	4958.23	5829.85	5739.01	5499.41	10.6636	10.8959	11.8972	11.1171	10.9689	11.023	11.2122	11.1135	11.1084
sp|Q9CZ13|QCR1_MOUSE	Uqcrc1	QCR1_MOUSE Cytochrome b-c1 complex subunit 1, mitochondrial	35	4438.59	4806.51	4087.53	5080.75	3869.64	3820.28	4216.91	4168.78	3963.55	12.0545	11.7408	10.7923	11.6191	11.4541	11.0027	10.5066	10.4582	10.3717
sp|P60202|MYPR_MOUSE	Plp1	MYPR_MOUSE Myelin proteolipid protein	35	4909.7	5018.51	4199.46	6147.62	4920.63	4237.58	5476.7	5387.43	4864.56	11.3578	10.4418	9.44452	11.9753	12.4065	10.3958	11.6231	11.5123	10.8429
sp|P21107|TPM3_MOUSE	Tpm3	TPM3_MOUSE Tropomyosin alpha-3 chain	34	5962.46	6699.98	6157.06	7103.57	5014.36	5924.74	6154.95	5247.26	5494.37	11.5795	11.703	11.6247	11.6166	10.6137	12.2021	10.966	9.41319	10.2812
sp|Q5DQR4|STB5L_MOUSE	Stxbp5l	STB5L_MOUSE Syntaxin-binding protein 5-like	34	6071.95	6968.21	6680.18	7080.56	5175.47	6186.23	6842.89	6264.79	6310.98	11.0114	11.3657	11.7774	10.8124	10.2294	11.8971	11.3846	10.4945	11.0274
sp|Q6NVE8|WDR44_MOUSE	Wdr44	WDR44_MOUSE WD repeat-containing protein 44	34	4294.69	4675	4390.74	5036.98	3840.25	4136.95	4691.08	4371.27	4069.92	11.3481	11.1105	11.2791	11.2073	11.0596	11.5924	11.3717	10.6694	10.3619
sp|Q6NXK7|DPP10_MOUSE	Dpp10	DPP10_MOUSE Inactive dipeptidyl peptidase 10	34	4840.28	5725.26	4865.68	5712.14	4185.29	4531.6	4684.4	4648.15	4374.39	11.6065	12.3478	11.3429	11.5338	10.9382	11.5235	10.305	10.2956	10.1068
sp|Q8BMF4|ODP2_MOUSE	Dlat	ODP2_MOUSE Dihydrolipoyllysine-residue acetyltransferase component of pyruvate dehydrogenase complex, mitochondrial	34	4786.2	5149.85	4377.09	5165.37	4000.37	4227.82	4709.69	4342.79	4338.51	12.1542	11.7623	10.8061	11.0453	11.0719	11.3855	10.9721	10.187	10.6155
sp|Q9ERD7|TBB3_MOUSE	Tubb3	TBB3_MOUSE Tubulin beta-3 chain	34	4648.88	6441.37	5710.5	6617.48	5376.59	5100.02	4523.96	5886.84	5581.1	9.72564	12.1202	11.6142	11.6574	12.2592	11.3147	8.6826	11.3761	11.25
sp|P19783|COX41_MOUSE	Cox4i1	COX41_MOUSE Cytochrome c oxidase subunit 4 isoform 1, mitochondrial	34	3433.7	3506.32	3172.05	3862.3	3234.23	3115.47	3538.72	3471.48	3292.72	11.688	10.7347	10.497	11.0704	11.9987	11.2461	11.0506	10.9152	10.7993
sp|Q8BGT8|PHIPL_MOUSE	Phyhipl	PHIPL_MOUSE Phytanoyl-CoA hydroxylase-interacting protein-like	34	6886.26	7276.23	6749.97	7982.48	5885.68	6269.32	7288.41	6852.11	6645.04	11.6329	11.0554	11.0855	11.3549	10.8365	11.2312	11.2954	10.6923	10.816
sp|P40142|TKT_MOUSE	Tkt	TKT_MOUSE Transketolase	34	5250.06	5943.42	5523.61	6389.23	4377.06	4862.2	5454.94	5378.93	5275.71	11.3322	11.5384	11.5909	11.6128	10.2972	11.1297	10.8019	10.7247	10.9722
sp|Q3UHK6|TEN4_MOUSE	Tenm4	TEN4_MOUSE Teneurin-4	34	3408.93	4051.48	3915.26	4578.51	3351.65	3336.41	3593.57	3725.6	3480.65	10.6537	11.3883	11.8957	12.0489	11.4164	11.0576	10.3032	10.7552	10.481
sp|Q9DB20|ATPO_MOUSE	Atp5o	ATPO_MOUSE ATP synthase subunit O, mitochondrial	34	4477.96	4939.71	4512.13	5367.67	4264.5	4148.93	4688.05	4744.23	4427.19	11.2444	11.1563	11.015	11.3496	11.6711	11.0482	10.7997	11.0043	10.7114
sp|P27773|PDIA3_MOUSE	Pdia3	PDIA3_MOUSE Protein disulfide-isomerase A3	34	6202.09	6509.37	6293.35	7453.79	5376.63	5775.38	7043.86	6523.74	6824.4	11.175	10.5489	11.0239	11.309	10.5586	11.0354	11.6434	10.8579	11.8477
sp|Q62108|DLG4_MOUSE	Dlg4	DLG4_MOUSE Disks large homolog 4	34	6058.31	6718.27	5976.35	6983.5	4937.47	5348.98	6262.92	5773.49	5769.73	11.7675	11.7369	11.2854	11.4221	10.4526	11.0181	11.1602	10.3589	10.7982
sp|Q8C1A5|THOP1_MOUSE	Thop1	THOP1_MOUSE Thimet oligopeptidase	34	5742.03	6201.86	5552.27	6767.02	4956.93	5111.25	5752.07	5795.14	5653.09	11.6434	11.3109	10.9454	11.5545	10.955	10.9911	10.7004	10.8547	11.0449
sp|Q8BGH2|SAM50_MOUSE	Samm50	SAM50_MOUSE Sorting and assembly machinery component 50 homolog	34	3453.38	3830.88	3447.23	3950.75	3027.7	3103.25	3697.15	3500.72	3408.78	11.4815	11.4555	11.1422	11.0605	10.9712	10.9414	11.2767	10.7511	10.9198
sp|Q9JLN9|MTOR_MOUSE	Mtor	MTOR_MOUSE Serine/threonine-protein kinase mTOR	34	4367.92	4818.7	4808.21	5251.69	4010.21	4127.1	5287.7	5065.29	4820.39	10.7266	10.6434	11.4794	10.8599	10.7335	10.7481	11.9128	11.4903	11.4059
sp|Q6P9K9|NRX3A_MOUSE	Nrxn3	NRX3A_MOUSE Neurexin-3	34	5696.04	6113.77	5186.35	6037.24	5044.49	4741.75	5659.83	5333.35	5089.94	12.1528	11.732	10.7575	10.8463	11.7302	10.7286	11.0781	10.511	10.4635
sp|Q922D8|C1TC_MOUSE	Mthfd1	C1TC_MOUSE C-1-tetrahydrofolate synthase, cytoplasmic	34	4978.47	5539.77	4932.56	5805.79	4509.98	4441.63	5280.92	5315.89	5065.59	11.3387	11.3481	10.9216	11.1345	11.1952	10.7278	11.0342	11.1837	11.1163
sp|Q61315|APC_MOUSE	Apc	APC_MOUSE Adenomatous polyposis coli protein	34	3898.06	4476.99	4704.24	4942.48	3695.51	3817.09	5156.79	4828	4529.76	10.1802	10.5161	11.9438	10.869	10.5188	10.5716	12.3551	11.647	11.3984
sp|Q2PFD7|PSD3_MOUSE	Psd3	PSD3_MOUSE PH and SEC7 domain-containing protein 3	34	6443.84	7434.48	7094.23	8014.38	5914.81	5681.04	7004.13	6552.35	6224.84	11.1634	11.5841	11.9482	11.6912	11.1681	10.4371	11.1318	10.4855	10.3906
sp|O70250|PGAM2_MOUSE	Pgam2	PGAM2_MOUSE Phosphoglycerate mutase 2	33	6089.2	6538.17	5550.71	6720.24	5067.56	5910.53	6185.17	6000	5614.25	11.837	11.4314	10.49	11.0003	10.7366	12.1845	11.0305	10.7739	10.5156
sp|P29341|PABP1_MOUSE	Pabpc1	PABP1_MOUSE Polyadenylate-binding protein 1	33	3710.92	3779.33	3826.19	4220.17	3249.34	3572.48	3971.2	3991.04	3622.36	11.4065	10.4483	11.4336	10.9229	10.8856	11.645	11.1983	11.3317	10.7281
sp|Q7TQF7|AMPH_MOUSE	Amph	AMPH_MOUSE Amphiphysin	33	5583.89	6653.43	5596.59	6876.35	5230.21	5507.57	5975.64	5842.39	5556.92	11.0412	11.8327	10.7584	11.4492	11.2716	11.5489	10.8399	10.6711	10.587
sp|Q63810|CANB1_MOUSE	Ppp3r1	CANB1_MOUSE Calcineurin subunit B type 1	33	4960.52	4852.5	5126.62	5645.83	4284.32	4831.93	5949.58	5524.19	5213.68	11.162	9.82068	11.2148	10.6975	10.5071	11.5302	12.2818	11.4822	11.3037
sp|Q61361|PGCB_MOUSE	Bcan	PGCB_MOUSE Brevican core protein	33	3554.52	4166	3325.03	4000.29	3171.49	3304.68	3467.8	3553.53	3190.76	11.6918	12.3248	10.6327	11.0798	11.3697	11.5274	10.4644	10.797	10.1124
sp|Q8C419|GP158_MOUSE	Gpr158	GP158_MOUSE Probable G-protein coupled receptor 158	33	5315.71	5915.46	5706.41	6247.05	4807.29	5254.18	6317.91	5810.85	5703.87	10.8672	10.8769	11.3414	10.754	10.7114	11.391	11.8493	10.9733	11.2354
sp|Q9R1V6-11|ADA22_MOUSE	Adam22	ADA22_MOUSE Isoform 9 of Disintegrin and metalloproteinase domain-containing protein 22	33	3793.93	4507.01	4080.06	4808.52	3537.1	3654.55	3784.15	4157.09	3879.25	10.9515	11.7012	11.4497	11.6878	11.128	11.1871	10.021	11.0844	10.7893
sp|O88307|SORL_MOUSE	Sorl1	SORL_MOUSE Sortilin-related receptor	33	4355.96	4867.57	4879.98	5089.55	4060.73	4132.67	4551.2	4767.62	4744.2	10.966	11.0214	11.9434	10.789	11.1418	11.033	10.5111	11.0868	11.5077
sp|Q8CAA7|PGM2L_MOUSE	Pgm2l1	PGM2L_MOUSE Glucose 1,6-bisphosphate synthase	33	5134.48	6030.27	5287.74	6016.08	4649.19	4689.67	5387.38	5514.35	5001.44	11.245	11.8784	11.2584	11.0947	11.0975	10.8919	10.8243	11.1557	10.554
sp|Q8BWF0|SSDH_MOUSE	Aldh5a1	SSDH_MOUSE Succinate-semialdehyde dehydrogenase, mitochondrial	33	5851.27	6386.79	5413.28	6593.04	5175.52	5051.05	6064.62	5663.39	5600.25	11.7973	11.5818	10.6106	11.1933	11.373	10.7998	11.2175	10.5475	10.8793
sp|Q9CU62|SMC1A_MOUSE	Smc1a	SMC1A_MOUSE Structural maintenance of chromosomes protein 1A	33	4368.4	4734.44	5050.83	5413.92	3904.13	4291.49	5449.64	5704.64	5235.13	10.348	10.087	11.6317	10.799	10.0796	10.7805	11.843	12.4825	11.9487
tr|B7ZCJ1|B7ZCJ1_MOUSE	Arhgap21	B7ZCJ1_MOUSE Rho GTPase-activating protein 21	33	3463.15	3859.85	3831.77	4201.79	3477.23	3261.82	4379.15	4145.09	4009.43	10.4449	10.4704	11.2351	10.671	11.4301	10.4326	12.1166	11.548	11.6513
sp|P35908|K22E_HUMAN_contaminant	KRT2	K22E_HUMAN_contaminant Keratin, type II cytoskeletal 2 epidermal	33	4535.56	3671.55	2845.61	5725.49	6651.92	2973.72	2274.09	2288.44	3147.96	13.7183	9.98801	8.3674	14.5821	21.9282	9.53825	6.31012	6.39365	9.17401
sp|P35527|K1C9_HUMAN_contaminant	KRT9	K1C9_HUMAN_contaminant Keratin, type I cytoskeletal 9	33	6668.75	4704.78	4232.75	9703.32	11866.2	4267.09	3692.07	3048.39	5309.54	12.8337	8.14341	7.91909	15.7241	24.8888	8.70839	6.51834	5.41898	9.8452
sp|Q8CGK3|LONM_MOUSE	Lonp1	LONM_MOUSE Lon protease homolog, mitochondrial	32	3743.99	4076.4	4066.31	4673.9	3301.75	3940.91	4157.33	3877.51	3909.75	10.9346	10.7079	11.5456	11.4944	10.5099	12.2058	11.1389	10.4607	11.0022
sp|Q62318|TIF1B_MOUSE	Trim28	TIF1B_MOUSE Transcription intermediary factor 1-beta	32	4684.08	4007.78	4694.03	4352.7	4287.05	4414.98	4368.83	5240.49	4105.85	12.1109	9.32001	11.799	9.47653	12.0808	12.1054	10.3628	12.516	10.2286
sp|P63040|CPLX1_MOUSE	Cplx1	CPLX1_MOUSE Complexin-1	32	3750.19	3628	4031.02	4471.48	3407.51	3997.84	5265.01	4507.09	4469.81	10.4314	9.07647	10.9006	10.4732	10.3303	11.7927	13.4354	11.5805	11.9795
sp|P62874|GBB1_MOUSE	Gnb1	GBB1_MOUSE Guanine nucleotide-binding protein G(I)/G(S)/G(T) subunit beta-1	32	3632.59	3950.54	3433.21	4168.24	3434.32	3496.33	3517.72	3748.19	3594.58	11.4821	11.2311	10.5499	11.0942	11.8313	11.7197	10.2006	10.9437	10.9475
sp|Q02248|CTNB1_MOUSE	Ctnnb1	CTNB1_MOUSE Catenin beta-1	32	5703.11	6311.05	5716.65	6544.5	4983.38	5418.65	5838.49	5797.86	5430.63	11.5052	11.451	11.2117	11.1173	10.957	11.5924	10.8055	10.8041	10.5559
sp|P62823|RAB3C_MOUSE	Rab3c	RAB3C_MOUSE Ras-related protein Rab-3C	32	3375.13	3805.41	3402	4169.45	2980.87	3159.14	3194.82	3133.97	2980.82	11.6734	11.8377	11.439	12.143	11.2366	11.5871	10.1371	10.0125	9.93354
sp|Q91ZJ5|UGPA_MOUSE	Ugp2	UGPA_MOUSE UTP--glucose-1-phosphate uridylyltransferase	32	6099.69	6683.87	5406.68	6406.85	5175.97	5586.3	6066.08	6056.77	5877.06	11.925	11.7528	10.2761	10.5472	11.0288	11.5818	10.8798	10.9379	11.0706
sp|P00920|CAH2_MOUSE	Ca2	CAH2_MOUSE Carbonic anhydrase 2	32	2734.59	2988.3	2488.21	3108.89	2544.06	2578.98	2813.59	2966.52	2782.05	11.4089	11.2134	10.0922	10.9219	11.5682	11.4104	10.769	11.4325	11.1835
sp|Q8BIJ6|SYIM_MOUSE	Iars2	SYIM_MOUSE Isoleucine--tRNA ligase, mitochondrial	32	4182.4	4773.5	4387.51	5125.94	3845.62	4077.03	4302.32	4502.56	4395.68	11.0313	11.324	11.2504	11.3845	11.0549	11.4037	10.4104	10.9699	11.1709
sp|Q62420|SH3G2_MOUSE	Sh3gl2	SH3G2_MOUSE Endophilin-A1	32	2937	3202.35	2853.12	3480.62	2638.95	2719.81	2995.29	2900.27	2759.85	11.5774	11.3537	10.9338	11.5532	11.3377	11.3696	10.8319	10.5605	10.4822
tr|E9Q9G6|E9Q9G6_MOUSE	Kif1a	E9Q9G6_MOUSE Kinesin-like protein KIF1A	32	4460.58	4943.35	4828.62	5262.82	4057.38	4395.27	5113.86	5071.38	4815.56	10.8446	10.8095	11.4128	10.7741	10.7512	11.3321	11.406	11.3891	11.2806
sp|Q61301|CTNA2_MOUSE	Ctnna2	CTNA2_MOUSE Catenin alpha-2	32	3840.72	4387.75	4000.46	4580.43	3636.1	3670.85	4036.86	3997.21	3772.79	11.1584	11.4655	11.2991	11.2056	11.5136	11.3098	10.7595	10.7272	10.5612
tr|A2AI20|A2AI20_MOUSE	Grin1	A2AI20_MOUSE Glutamate receptor ionotropic, NMDA 1	32	3988.22	4402.48	4055.2	4567.08	3558.31	3695.2	4154.34	3870.11	4083.97	11.4427	11.3607	11.3111	11.0338	11.127	11.2431	10.9348	10.2568	11.2899
sp|Q68FH0|PKP4_MOUSE	Pkp4	PKP4_MOUSE Plakophilin-4	32	3472.02	3875.86	3586.55	4148.3	3332.56	3409.17	3981.34	4030.41	3750.18	10.7913	10.8348	10.8371	10.8568	11.289	11.2367	11.3523	11.5713	11.2307
tr|F8WIT2|F8WIT2_MOUSE	Anxa6	F8WIT2_MOUSE Annexin	32	5199.73	5602.45	4967.18	5828.61	4366.12	4640.45	5359.51	4934.29	4952.85	11.8439	11.4776	10.9994	11.1794	10.8392	11.2092	11.1995	10.3819	10.87
sp|Q5SSL4|ABR_MOUSE	Abr	ABR_MOUSE Active breakpoint cluster region-related protein	32	5388.42	6031.34	5324.05	6329.69	4752.3	5010.26	5655.51	5560.72	5501.54	11.359	11.4354	10.911	11.2357	10.9186	11.2005	10.9373	10.828	11.1744
sp|Q8R1Q8|DC1L1_MOUSE	Dync1li1	DC1L1_MOUSE Cytoplasmic dynein 1 light intermediate chain 1	32	5332.94	6196.56	5519.93	6520.23	4501.78	5034.54	6473.24	5450.25	5675.2	11.0072	11.5032	11.0761	11.3321	10.127	11.0197	12.2572	10.3912	11.2863
sp|P70175|DLG3_MOUSE	Dlg3	DLG3_MOUSE Disks large homolog 3	32	4376.35	4909.56	4575.47	5083.95	4180.85	4126.99	4878.95	4759.68	4621.71	11.0013	11.1003	11.1819	10.7615	11.4547	11.0019	11.2518	11.0523	11.1943
sp|Q8BY87-2|UBP47_MOUSE	Usp47	UBP47_MOUSE Isoform 2 of Ubiquitin carboxyl-terminal hydrolase 47	32	4067.56	4643.74	4366.63	4893.73	3655.84	3827.11	4368.21	4666.32	4316.12	10.955	11.2488	11.4333	11.0983	10.7313	10.9308	10.793	11.609	11.2004
sp|Q8BMF3|MAON_MOUSE	Me3	MAON_MOUSE NADP-dependent malic enzyme, mitochondrial	32	6310.66	6897.52	6069.51	7352.7	5647.35	5662.32	6993.03	6310.04	6154.45	11.4864	11.2918	10.7401	11.2693	11.2032	10.9296	11.6771	10.6092	10.7934
sp|Q60902|EP15R_MOUSE	Eps15l1	EP15R_MOUSE Epidermal growth factor receptor substrate 15-like 1	32	5127.61	5578.44	4734.63	5891.83	4584.26	4529.81	5443.57	5081.5	4988.86	11.6526	11.402	10.4602	11.2745	11.3544	10.9166	11.3489	10.667	10.9237
sp|Q8BIK4|DOCK9_MOUSE	Dock9	DOCK9_MOUSE Dedicator of cytokinesis protein 9	32	4302.22	5051.48	4816.03	5283.14	4228.98	4060.58	4677.17	4659.15	4493.28	10.8054	11.4111	11.7593	11.1732	11.5763	10.8152	10.7768	10.8092	10.8736
sp|P19246|NFH_MOUSE	Nefh	NFH_MOUSE Neurofilament heavy polypeptide	32	6118.72	6320.95	5099.25	6301.48	4971.44	4952.48	6072.4	5352.51	5692.5	12.5544	11.6648	10.1716	10.8872	11.1174	10.776	11.4303	10.1446	11.2538
sp|Q8C1B1|CAMP2_MOUSE	Camsap2	CAMP2_MOUSE Calmodulin-regulated spectrin-associated protein 2	32	4068.7	4748.17	4633.52	5128.33	4201.48	3972.76	4715.66	4918.94	4556.71	10.3754	10.8902	11.487	11.012	11.6772	10.7434	11.032	11.5868	11.196
sp|Q91VR5|DDX1_MOUSE	Ddx1	DDX1_MOUSE ATP-dependent RNA helicase DDX1	32	4103.3	4460.4	4350.65	4968.78	3809.97	3758.98	4534.27	4773.08	4409.58	10.9465	10.7023	11.2835	11.1618	11.0778	10.6344	11.0972	11.762	11.3345
sp|P23116|EIF3A_MOUSE	Eif3a	EIF3A_MOUSE Eukaryotic translation initiation factor 3 subunit A	32	5348.26	5644.09	5935.41	6471.81	4774.46	4993.37	6919.52	6518.3	6189.15	10.5956	10.057	11.4317	10.7964	10.3092	10.4908	12.5763	11.9286	11.8143
sp|Q7TSC1|PRC2A_MOUSE	Prrc2a	PRC2A_MOUSE Protein PRRC2A	32	4237.14	4642.97	4975.02	5193.17	3952.82	4068.72	5975.69	5571.53	5270.04	10.1	9.95414	11.5289	10.4236	10.2693	10.285	13.0676	12.2677	12.1038
sp|Q8BLK3|LSAMP_MOUSE	Lsamp	LSAMP_MOUSE Limbic system-associated membrane protein	32	6213.67	6778.73	6619.29	7306.32	5777.05	5338.72	7448.31	6885.83	6241.69	11.0832	10.875	11.4783	10.9738	11.2308	10.0985	12.1881	11.3453	10.7271
sp|Q61543|GSLG1_MOUSE	Glg1	GSLG1_MOUSE Golgi apparatus protein 1	32	4132.29	4871.49	5070.68	5504.98	4411.34	3869.12	4619.72	5396.32	5029.76	10.0643	10.6712	12.0061	11.2898	11.7098	9.99318	10.3221	12.1403	11.8032
sp|Q61464|ZN638_MOUSE	Znf638	ZN638_MOUSE Zinc finger protein 638	32	3268.96	3431.62	4042.23	4081.67	3111.52	2993.2	4640.56	4666.79	4229.67	9.92666	9.37247	11.9333	10.4369	10.298	9.63895	12.9278	13.0904	12.3755
sp|P20152|VIME_MOUSE	Vim	VIME_MOUSE Vimentin	31	3395.48	3732.78	2422.04	3245.95	2937.38	3245.06	3148.97	3369.67	4278.62	11.8692	11.7358	8.2309	9.55434	11.1909	12.0294	10.0983	10.8805	14.4107
sp|O54991|CNTP1_MOUSE	Cntnap1	CNTP1_MOUSE Contactin-associated protein 1	31	3949.92	4518.82	3902.55	4792.37	3589.23	3918.46	4042.87	4166.52	4013.26	11.1783	11.502	10.737	11.4203	11.0708	11.7599	10.4964	10.8919	10.9433
sp|Q8K411|PREP_MOUSE	Pitrm1	PREP_MOUSE Presequence protease, mitochondrial	31	4500.98	5064.4	4897.82	5390.34	4227.9	4563.67	5166.36	4997.66	5115.38	10.694	10.8223	11.3131	10.7842	10.9482	11.4986	11.261	10.9683	11.7104
sp|Q9JLV5|CUL3_MOUSE	Cul3	CUL3_MOUSE Cullin-3	31	4009.18	4171.79	4072.55	4552.59	3559.25	3804.83	4228	4211.99	4039.5	11.4124	10.6809	11.2703	10.9124	11.0425	11.4857	11.0413	11.0752	11.0793
sp|Q62418|DBNL_MOUSE	Dbnl	DBNL_MOUSE Drebrin-like protein	31	6070.84	6878.71	5822.09	7152.27	5098.28	5622.35	5949.42	5974.08	5853.18	11.6578	11.8805	10.8691	11.5651	10.6703	11.4495	10.481	10.5969	10.8298
sp|Q8CJH3|PLXB1_MOUSE	Plxnb1	PLXB1_MOUSE Plexin-B1	31	3547.3	4017.34	3771.52	4220.98	3385.58	3440.42	3655.01	3680.56	3663.93	11.0842	11.2904	11.457	11.1061	11.53	11.4004	10.4775	10.6234	11.0311
sp|O35685|NUDC_MOUSE	Nudc	NUDC_MOUSE Nuclear migration protein nudC	31	6655.85	7248	6748.62	7768.27	5896.23	6186.62	6847.8	6796.91	6418.34	11.4738	11.2379	11.3101	11.2764	11.0781	11.3099	10.8297	10.8233	10.6608
sp|Q61036|PAK3_MOUSE	Pak3	PAK3_MOUSE Serine/threonine-protein kinase PAK 3	31	5033.43	5626.17	5467.89	6034.45	4454.96	4660.65	5365.23	5179.59	4928.07	11.2495	11.3095	11.8805	11.3565	10.8517	11.0463	11.0006	10.6931	10.6122
sp|P35700|PRDX1_MOUSE	Prdx1	PRDX1_MOUSE Peroxiredoxin-1	31	5192.5	5522.48	4772.2	5824.59	4183.54	4535.76	5290.28	5144.45	5095.05	11.9127	11.3954	10.6439	11.2523	10.4608	11.0353	11.1346	10.9022	11.2628
sp|Q3V3R1|C1TM_MOUSE	Mthfd1l	C1TM_MOUSE Monofunctional C1-tetrahydrofolate synthase, mitochondrial	31	4997.88	5525.59	5125.94	6083.23	4588.8	4616.92	5437.73	5176.02	5033.56	11.2084	11.1454	11.1757	11.4876	11.2161	10.9802	11.1876	10.7224	10.8766
sp|O35136|NCAM2_MOUSE	Ncam2	NCAM2_MOUSE Neural cell adhesion molecule 2	31	5834.14	6460.96	5957.5	6791.33	4989.66	5238.09	5957.26	5876.49	5823.56	11.5178	11.4723	11.4341	11.2898	10.7362	10.9664	10.7895	10.7164	11.0775
sp|Q61941|NNTM_MOUSE	Nnt	NNTM_MOUSE NAD(P) transhydrogenase, mitochondrial	31	5544.85	6458.93	5776.27	6562.36	4962.37	5421.06	7134.57	6464.04	6641.1	10.5479	11.051	10.6825	10.5118	10.2886	10.9361	12.4511	11.3586	12.1725
sp|P48318|DCE1_MOUSE	Gad1	DCE1_MOUSE Glutamate decarboxylase 1	31	2862.89	3221.1	2961.68	3680.58	2713.23	2699.41	3231.73	3066.66	2968.98	10.9202	11.0507	10.9827	11.8217	11.2797	10.9193	11.3089	10.8052	10.9117
sp|Q9ERK4|XPO2_MOUSE	Cse1l	XPO2_MOUSE Exportin-2	31	4940.57	5654.05	5296.69	5961.03	4634.97	4558.51	5290.49	5563.06	5126.29	10.9761	11.2977	11.4399	11.1514	11.2229	10.7397	10.7827	11.4163	10.9732
tr|E9PZP8|E9PZP8_MOUSE	Herc1	E9PZP8_MOUSE Protein Herc1	31	2572.87	2847.63	2922	3069.72	2481.11	2415.27	2938.24	2914.08	2745.12	10.7843	10.7354	11.907	10.8346	11.3347	10.736	11.2986	11.2828	11.0866
sp|Q3UGY8|BIG3_MOUSE	Arfgef3	BIG3_MOUSE Brefeldin A-inhibited guanine nucleotide-exchange protein 3	31	2972.29	3346.24	3409.47	3608.61	2996.75	2844.18	3255.11	3558.38	3325.9	10.5793	10.7123	11.7977	10.8155	11.6253	10.7355	10.629	11.6993	11.4061
sp|P39447|ZO1_MOUSE	Tjp1	ZO1_MOUSE Tight junction protein ZO-1	31	4668.44	5256.67	4968.29	5429.85	4334.38	4329.87	5575.83	5382.94	5383.48	10.7595	10.8966	11.132	10.5377	10.8876	10.5826	11.7893	11.4599	11.9548
sp|Q6P5E4|UGGG1_MOUSE	Uggt1	UGGG1_MOUSE UDP-glucose:glycoprotein glucosyltransferase 1	31	4660.86	4981.6	5041.65	5504.85	3913.33	4175.76	5493.96	5006.01	5002.95	11.1354	10.7045	11.71	11.0745	10.1899	10.5797	12.0416	11.0477	11.5166
sp|Q00PI9|HNRL2_MOUSE	Hnrnpul2	HNRL2_MOUSE Heterogeneous nuclear ribonucleoprotein U-like protein 2	31	5154.59	5559.63	5629.99	6344.61	4504.04	4798.87	6403.96	6196.98	5859.64	10.691	10.3713	11.3522	11.0808	10.1816	10.5552	12.1853	11.8726	11.71
sp|Q6A4J8|UBP7_MOUSE	Usp7	UBP7_MOUSE Ubiquitin carboxyl-terminal hydrolase 7	31	6246.06	6978.13	6828.02	7643.82	5521.81	5531.07	6781.59	6772.83	6411.97	11.1266	11.1804	11.8249	11.4658	10.7207	10.4488	11.0828	11.1447	11.0055
sp|Q9D8N0|EF1G_MOUSE	Eef1g	EF1G_MOUSE Elongation factor 1-gamma	31	6164.74	6465.74	6696.34	7531.32	5432.65	5384.32	6967.66	6535.84	6435.11	11.1897	10.5556	11.8165	11.5111	10.7474	10.3642	11.6026	10.9584	11.2544
tr|E9QKE4|E9QKE4_MOUSE	Rab3gap2	E9QKE4_MOUSE Rab3 GTPase-activating protein non-catalytic subunit	31	4976.7	5480.01	5502.79	5910.21	4474.61	4373.6	5854.78	5227.07	5153.63	11.081	10.9744	11.9115	11.081	10.8587	10.327	11.9594	10.7507	11.0563
sp|P46660|AINX_MOUSE	Ina	AINX_MOUSE Alpha-internexin	30	4908.58	4863.09	3904.97	5067.49	3768.4	4215.81	4674.04	3987.18	4319.98	12.8979	11.493	9.9753	11.2123	10.7921	11.7474	11.2672	9.67762	10.9372
sp|Q8K3H0|DP13A_MOUSE	Appl1	DP13A_MOUSE DCC-interacting protein 13-alpha	30	3537.26	4164.38	3598.7	4377.61	3258.78	3509.93	3580.42	3811.28	3723.8	11.0076	11.6557	10.8872	11.471	11.0527	11.5831	10.2217	10.9556	11.1654
tr|E9Q7L0|E9Q7L0_MOUSE	Ogdhl	E9Q7L0_MOUSE Protein Ogdhl	30	3165.4	3509.66	2931	3491.79	2710.18	2944.32	3250.85	3157.68	3030.44	11.7206	11.6882	10.5508	10.8871	10.9372	11.5613	11.0428	10.8002	10.8116
sp|Q8BVI4|DHPR_MOUSE	Qdpr	DHPR_MOUSE Dihydropteridine reductase	30	4672.6	5004.86	4025.22	5225.39	3964.89	4116.93	4472.07	4309.61	4183.59	12.2035	11.7565	10.2202	11.4917	11.2861	11.4024	10.715	10.3969	10.5277
sp|Q9WV34|MPP2_MOUSE	Mpp2	MPP2_MOUSE MAGUK p55 subfamily member 2	30	3837.14	4370.3	3741.12	4447.72	3541.54	3608.14	3752.37	4085.34	3773.3	11.3902	11.6679	10.7962	11.1173	11.4578	11.3581	10.2185	11.2019	10.7921
sp|Q3UVX5|GRM5_MOUSE	Grm5	GRM5_MOUSE Metabotropic glutamate receptor 5	30	4218.89	4739.2	4553.38	5071.17	3936.17	4108.76	4507.24	4513.06	4475.23	10.9749	11.0884	11.5155	11.1083	11.16	11.3348	10.7566	10.8446	11.217
sp|P63082|VATL_MOUSE	Atp6v0c	VATL_MOUSE V-type proton ATPase 16 kDa proteolipid subunit	30	4141.99	4518.73	3924.89	4915.06	3900.09	3811.23	4124.37	4211.69	3701.1	11.6044	11.3865	10.6902	11.5953	11.909	11.3234	10.6006	10.8996	9.99092
tr|F8WIG2|F8WIG2_MOUSE	Begain	F8WIG2_MOUSE Brain-enriched guanylate kinase-associated protein	30	3617.4	3981.66	3538.17	4073.03	3291.08	3355.82	3992.14	3671.84	3398.33	11.4684	11.3536	10.9052	10.8734	11.3719	11.2825	11.6111	10.7531	10.3809
sp|Q6ZPJ3|UBE2O_MOUSE	Ube2o	UBE2O_MOUSE Ubiquitin-conjugating enzyme E2 O	30	3507.69	4157.69	3973.5	4527.71	3398.74	3623.37	4217.89	4243.69	3980.04	10.2883	10.9682	11.3304	11.1826	10.865	11.2703	11.3496	11.4976	11.2479
sp|Q91YT0|NDUV1_MOUSE	Ndufv1	NDUV1_MOUSE NADH dehydrogenase [ubiquinone] flavoprotein 1, mitochondrial	30	4225.92	4742.6	4186.72	5033.17	3715.63	3852.61	4223	4071.4	3927.29	11.6243	11.7334	11.1961	11.658	11.1395	11.2383	10.6568	10.345	10.4088
sp|Q6PFD5|DLGP3_MOUSE	Dlgap3	DLGP3_MOUSE Disks large-associated protein 3	30	3646.9	3947.69	3809.78	4286.41	3311.99	3428.11	3959.61	4017.57	3680	11.1713	10.8764	11.3456	11.0564	11.0575	11.1361	11.1274	11.368	10.8615
tr|Q5SWZ5|Q5SWZ5_MOUSE	Mprip	Q5SWZ5_MOUSE Myosin phosphatase Rho-interacting protein	30	3141	3533.15	3434.87	3721.98	2962.62	3054.5	3507.62	3557.31	3493.61	10.7825	10.9088	11.4633	10.7589	11.0845	11.1197	11.0466	11.2802	11.5555
sp|P80314|TCPB_MOUSE	Cct2	TCPB_MOUSE T-complex protein 1 subunit beta	30	6290.3	6683.87	5744.99	7018.91	5294.46	5556.53	6740.48	6025.33	6051.93	11.8593	11.3339	10.5299	11.1429	10.8792	11.1094	11.6584	10.4933	10.9937
sp|Q61598|GDIB_MOUSE	Gdi2	GDIB_MOUSE Rab GDP dissociation inhibitor beta	30	5574.85	6340.68	5303.98	6455.21	4919.89	4971.46	5456.69	5472.88	5155.12	11.7285	11.9979	10.8482	11.4356	11.2811	11.0916	10.5317	10.6357	10.4498
sp|Q8R0Y6|AL1L1_MOUSE	Aldh1l1	AL1L1_MOUSE Cytosolic 10-formyltetrahydrofolate dehydrogenase	30	4300.38	4741.43	4167.99	4990.12	3705.55	3956.08	4849.3	4271.36	4613.46	11.3489	11.2543	10.6935	11.0892	10.6583	11.0717	11.7405	10.4125	11.731
sp|P10852|4F2_MOUSE	Slc3a2	4F2_MOUSE 4F2 cell-surface antigen heavy chain	30	5221.35	5970.3	5152.6	6145.81	4589.84	4668.26	5318.36	4980.9	4723.83	11.6652	11.9968	11.1913	11.5619	11.1762	11.0602	10.9005	10.2792	10.1687
sp|P70168|IMB1_MOUSE	Kpnb1	IMB1_MOUSE Importin subunit beta-1	30	3716.79	4241.72	3705.27	4505.89	3550.31	3429.29	3773.06	3817.5	3655.47	11.2821	11.5804	10.9342	11.517	11.7455	11.0389	10.5069	10.7039	10.6912
sp|O08749|DLDH_MOUSE	Dld	DLDH_MOUSE Dihydrolipoyl dehydrogenase, mitochondrial	30	6364.59	7018.82	6130.36	7250.59	5533.69	5514.64	6047.07	5920.85	5714.76	11.9759	11.8785	11.2142	11.4881	11.3485	11.0041	10.4386	10.2911	10.3609
sp|A2RSJ4|UH1BL_MOUSE	Uhrf1bp1l	UH1BL_MOUSE UHRF1-binding protein 1-like	30	4332.57	4825.17	4290.85	4877.8	3938.4	3898.67	4535.41	4366.13	4308.87	11.485	11.5043	11.058	10.888	11.3787	10.9598	11.0297	10.6911	11.0055
sp|Q9Z2I0|LETM1_MOUSE	Letm1	LETM1_MOUSE LETM1 and EF-hand domain-containing protein 1, mitochondrial	30	3949.17	4597.87	4034.36	4712.54	3752.8	3713.06	4530.61	4104.01	4170.31	10.9796	11.4974	10.9044	11.0325	11.3716	10.9475	11.5558	10.5397	11.1715
tr|Q68FL0|Q68FL0_MOUSE	Slc8a1	Q68FL0_MOUSE Slc8a1 protein	30	3325.03	3827.13	3336.41	3865.4	3065.15	2948.09	3380.07	3165.43	3099.3	11.5678	11.9754	11.2845	11.3237	11.6223	10.8767	10.788	10.1725	10.3891
tr|Q8K596|Q8K596_MOUSE	Slc8a2	Q8K596_MOUSE Protein Slc8a2	30	4123.92	4548.44	3968.88	4447.72	3747.31	3572.55	4098.27	4074.16	3968.44	11.7698	11.6757	11.0122	10.689	11.6564	10.8128	10.7305	10.7408	10.9129
sp|P24527|LKHA4_MOUSE	Lta4h	LKHA4_MOUSE Leukotriene A-4 hydrolase	30	5571.45	6068.38	5451.29	6528.33	4628.49	4822.87	5578.7	5547.86	5348.59	11.7587	11.5193	11.185	11.602	10.6468	10.7944	10.8015	10.8158	10.8766
sp|P02301|H3C_MOUSE	H3f3c	H3C_MOUSE Histone H3.3C	30	5282.92	5889.2	5626.79	6630.14	5078.82	5192.09	6388.62	7147.01	6236.6	10.329	10.3563	10.6953	10.9156	10.8227	10.7653	11.4592	12.9078	11.7488
sp|Q8CGY8|OGT1_MOUSE	Ogt	OGT1_MOUSE UDP-N-acetylglucosamine--peptide N-acetylglucosaminyltransferase 110 kDa subunit	30	6117.81	6872.07	6415.38	7115.42	5487.86	5476.47	6350.57	6392.98	6227.98	11.3192	11.4358	11.5395	11.0856	11.0665	10.7453	10.7794	10.9261	11.1027
sp|O08709|PRDX6_MOUSE	Prdx6	PRDX6_MOUSE Peroxiredoxin-6	30	5339.82	5799.77	4675.58	5952.16	4438.96	4540.16	5637.63	5501.07	5328.23	11.8258	11.5525	10.0667	11.0999	10.7145	10.6629	11.4542	11.2537	11.3697
sp|Q6PNC0|DMXL1_MOUSE	Dmxl1	DMXL1_MOUSE DmX-like protein 1	30	4012.25	4659.84	4549.92	5029.11	4012.37	3764.64	4507.27	4380.63	4212.87	10.7086	11.186	11.8058	11.3025	11.6717	10.6554	11.0362	10.8	10.8339
sp|P14685|PSMD3_MOUSE	Psmd3	PSMD3_MOUSE 26S proteasome non-ATPase regulatory subunit 3	30	5201.75	5571.66	5305.69	6081.32	4697.26	4654.58	5913.67	5719.87	5375.46	11.2021	10.7918	11.108	11.0277	11.025	10.6299	11.6833	11.3783	11.1539
sp|Q9Z1Q9|SYVC_MOUSE	Vars	SYVC_MOUSE Valine--tRNA ligase	30	3486.12	3626.57	3730.03	4168.02	3330.47	3196.73	4037.07	4153.22	3997.8	10.7943	10.0998	11.2283	10.8673	11.2395	10.4969	11.4678	11.879	11.9271
sp|P31786|ACBP_MOUSE	Dbi	ACBP_MOUSE Acyl-CoA-binding protein	30	2056.52	2162.63	1920.24	2387.84	1870.09	1764.03	2330.09	2162.64	2088.35	11.4662	10.845	10.4085	11.2106	11.3641	10.4302	11.9184	11.1381	11.2189
sp|Q78PY7|SND1_MOUSE	Snd1	SND1_MOUSE Staphylococcal nuclease domain-containing protein 1	30	4576.86	4701.01	4582.76	5187.55	4194.15	3906.94	5180.65	5035.08	4644.88	11.379	10.512	11.0767	10.8602	11.3649	10.3008	11.8163	11.5633	11.1268
sp|Q501J6|DDX17_MOUSE	Ddx17	DDX17_MOUSE Probable ATP-dependent RNA helicase DDX17	30	3885.52	4209.6	4195.28	4791.15	3687.86	3476.36	4429.22	4575.93	4201.79	10.8445	10.5672	11.3833	11.26	11.2181	10.2893	11.3409	11.7972	11.2994
sp|Q80U28-10|MADD_MOUSE	Madd	MADD_MOUSE Isoform 10 of MAP kinase-activating death domain protein	30	4104.17	4626.56	4589.66	4879.69	3722.22	3566.36	4984.91	4284.37	4570.08	10.9126	11.0643	11.864	10.9254	10.7868	10.0561	12.1597	10.5228	11.7082
sp|Q6PDQ2|CHD4_MOUSE	Chd4	CHD4_MOUSE Chromodomain-helicase-DNA-binding protein 4	30	3809.43	3959.26	4807.79	4566.33	3455.01	3537.03	5516.84	5562.67	4832.55	9.95619	9.30697	12.2159	10.0494	9.84168	9.8033	13.2277	13.4294	12.1695
sp|Q3UTJ2-2|SRBS2_MOUSE	Sorbs2	SRBS2_MOUSE Isoform 2 of Sorbin and SH3 domain-containing protein 2	29	3594.44	4766.36	3757.21	4414.23	3442.87	4099.64	3862.77	4194.59	4099.47	10.3529	12.3474	10.5206	10.7059	10.8078	12.522	10.2068	11.1599	11.3767
sp|O55106|STRN_MOUSE	Strn	STRN_MOUSE Striatin	29	3326.33	3676.98	3536.63	3949.35	2936.2	3338.74	3630.59	3446.03	3356.58	11.13	11.0658	11.5045	11.1274	10.7079	11.8471	11.1447	10.651	10.8215
sp|Q9JIA1|LGI1_MOUSE	Lgi1	LGI1_MOUSE Leucine-rich glioma-inactivated protein 1	29	3809.59	4197.63	3849.15	4528.78	3361.58	3724.02	3997	3797.92	3868.05	11.3193	11.2178	11.1187	11.3309	10.8861	11.7342	10.8953	10.4239	11.0738
sp|Q3UHL1|CAMKV_MOUSE	Camkv	CAMKV_MOUSE CaM kinase-like vesicle-associated protein	29	3753.6	4338.85	4123.18	4725.17	3540.74	3725.71	4064.34	3982.03	3687.84	10.9073	11.3398	11.6479	11.5618	11.2137	11.481	10.8348	10.6884	10.3253
sp|P80315|TCPD_MOUSE	Cct4	TCPD_MOUSE T-complex protein 1 subunit delta	29	2944.59	3123.67	2838.59	3434.94	2633.21	2765.64	3214.75	3203.71	3055.91	11.2984	10.78	10.5887	11.0982	11.012	11.2535	11.3162	11.355	11.2978
sp|Q6R891|NEB2_MOUSE	Ppp1r9b	NEB2_MOUSE Neurabin-2	29	3041.56	3341.86	3199.72	3667.36	2700.99	2841.52	3308.07	3039.04	2885.65	11.3382	11.2046	11.596	11.5118	10.9738	11.2331	11.3132	10.4647	10.3646
sp|Q9D4H8|CUL2_MOUSE	Cul2	CUL2_MOUSE Cullin-2	29	2936.29	3334.61	3045.16	3542.85	2711.13	2823.26	3098.78	3368.95	3074.07	10.9789	11.2142	11.0692	11.1546	11.0484	11.1947	10.6295	11.6358	11.0748
sp|Q8CDG3|VCIP1_MOUSE	Vcpip1	VCIP1_MOUSE Deubiquitinating protein VCIP135	29	4254.27	4615.95	4620.46	5057.15	3806.56	4105.69	4883.36	4802.26	4520.57	10.9278	10.6643	11.5383	10.9384	10.6568	11.1839	11.5077	11.3945	11.1883
sp|Q3TDD9|PPR21_MOUSE	Ppp1r21	PPR21_MOUSE Protein phosphatase 1 regulatory subunit 21	29	3467	3877.59	3739.09	4263.55	3074.86	3288.79	3896.32	3628.48	3583.38	11.0422	11.1078	11.5775	11.4344	10.6737	11.1081	11.3846	10.675	10.9966
sp|P48758|CBR1_MOUSE	Cbr1	CBR1_MOUSE Carbonyl reductase [NADPH] 1	29	3159.66	3419.19	2947.36	3566.35	2836.46	2789.1	3144.79	3069.11	2897.24	11.8498	11.5334	10.7461	11.2625	11.5941	11.0927	10.8199	10.6322	10.4693
sp|Q3TXX4|VGLU1_MOUSE	Slc17a7	VGLU1_MOUSE Vesicular glutamate transporter 1	29	4775.39	5356.64	4733.6	5321.43	4623.05	4360.93	5006.96	4953.84	4409.22	11.4361	11.5378	11.0206	10.7309	12.0666	11.0751	11.0003	10.9585	10.174
sp|Q9JM52|MINK1_MOUSE	Mink1	MINK1_MOUSE Misshapen-like kinase 1	29	4002.09	4462.91	4319.37	4861.08	3580.66	3838.4	4779.55	4473.3	4313.23	10.8298	10.8621	11.3632	11.0766	10.5605	11.015	11.8654	11.1816	11.246
sp|Q9Z0R6|ITSN2_MOUSE	Itsn2	ITSN2_MOUSE Intersectin-2	29	3308.61	3704.5	3336.59	3789.38	2937.3	3001.37	3563.86	3371.19	3237.12	11.424	11.5044	11.2001	11.0174	11.0537	10.9899	11.289	10.7522	10.7694
sp|Q8BUV3|GEPH_MOUSE	Gphn	GEPH_MOUSE Gephyrin	29	5261.98	5793.95	5121.8	6012.67	4775.88	4673.72	5482.21	5157.64	4980.46	11.6237	11.5115	10.9993	11.1841	11.4983	10.9486	11.1099	10.5241	10.6005
sp|P14733|LMNB1_MOUSE	Lmnb1	LMNB1_MOUSE Lamin-B1	29	3969.29	4387.1	4225.53	4759.82	3589.09	3768.68	4477.54	4585.67	4394.83	10.8695	10.8053	11.2493	10.9756	10.712	10.9443	11.2486	11.5996	11.5958
sp|Q8CIQ7|DOCK3_MOUSE	Dock3	DOCK3_MOUSE Dedicator of cytokinesis protein 3	29	4133.74	4505.95	4423.34	4734.86	3674.82	3868.37	4620.28	4730.04	4479.08	11.0219	10.8059	11.4659	10.6306	10.6791	10.9381	11.3017	11.6498	11.507
sp|Q8CC88|VWA8_MOUSE	Vwa8	VWA8_MOUSE von Willebrand factor A domain-containing protein 8	29	3493.92	3834.34	3527.05	3918.02	3193.96	3130.64	3757.71	3805.82	3466.28	11.3533	11.2063	11.1421	10.7205	11.3117	10.7881	11.202	11.4235	10.8526
sp|Q99JY9|ARP3_MOUSE	Actr3	ARP3_MOUSE Actin-related protein 3	29	3039.58	3418.63	3139.84	3578.49	2669.78	2679.18	3108.07	2967.81	2934.78	11.5347	11.6682	11.5837	11.4349	11.0422	10.7819	10.8204	10.4033	10.7307
sp|Q9D819|IPYR_MOUSE	Ppa1	IPYR_MOUSE Inorganic pyrophosphatase	29	4727.82	5088.29	4445.3	5508.66	4061.43	4158.28	5051.47	5095.22	4812.15	11.5093	11.1409	10.5205	11.2921	10.7759	10.735	11.2815	11.4576	11.2873
tr|E9PWG2|E9PWG2_MOUSE	Trappc8	E9PWG2_MOUSE Protein Trappc8	29	3020.2	3365.24	3308.03	3622.15	2898.14	2790.6	3239.56	3302.22	3238.98	10.953	10.9768	11.6631	11.0612	11.4552	10.7324	10.7782	11.0623	11.3179
sp|Q8R1B4|EIF3C_MOUSE	Eif3c	EIF3C_MOUSE Eukaryotic translation initiation factor 3 subunit C	29	4904.36	5309.52	5110.32	5909.26	4401.91	4522.6	5689.99	5654.74	5397.7	10.9321	10.6448	11.0743	11.0916	10.6943	10.6908	11.6358	11.6433	11.5929
sp|Q922B2|SYDC_MOUSE	Dars	SYDC_MOUSE Aspartate--tRNA ligase, cytoplasmic	29	3432.09	3818.08	3690.17	4246.91	3307.19	3247.74	4139.57	3834.92	3977.19	10.6419	10.648	11.1238	11.0886	11.1766	10.6793	11.7755	10.984	11.8823
sp|Q9Z0H8|CLIP2_MOUSE	Clip2	CLIP2_MOUSE CAP-Gly domain-containing linker protein 2	29	5147.73	5817.92	5394.96	6236	4802.76	4659.56	5665.58	5457.94	5224.86	11.112	11.2955	11.3217	11.335	11.2994	10.6665	11.2197	10.883	10.8671
sp|Q61292|LAMB2_MOUSE	Lamb2	LAMB2_MOUSE Laminin subunit beta-2	29	3109.89	4023.77	3900.8	3560.93	2898.91	3196.22	3977.2	4332.02	4401.93	9.73045	11.3235	11.8656	9.3819	9.88575	10.6054	11.4163	12.5204	13.2707
sp|O88844|IDHC_MOUSE	Idh1	IDHC_MOUSE Isocitrate dehydrogenase [NADP] cytoplasmic	29	3848.01	4336.62	3830.29	4655.87	3575.42	3369.75	3966.5	3883.4	3760	11.4144	11.5699	11.0457	11.6294	11.5593	10.6002	10.7941	10.6407	10.7465
sp|Q3TXS7|PSMD1_MOUSE	Psmd1	PSMD1_MOUSE 26S proteasome non-ATPase regulatory subunit 1	29	4988.91	5527.65	5200.78	5867.2	4400.78	4423.59	5567.22	5324.84	5161.74	11.2251	11.1863	11.3763	11.1162	10.792	10.555	11.4917	11.0671	11.1903
sp|Q9EQZ6|RPGF4_MOUSE	Rapgef4	RPGF4_MOUSE Rap guanine nucleotide exchange factor 4	29	5502.74	6261.41	5763.93	6534.12	5101.83	4785.94	5609.82	5407.62	5308.69	11.4325	11.7002	11.642	11.4311	11.5525	10.5446	10.6923	10.3779	10.627
sp|Q9DB05|SNAA_MOUSE	Napa	SNAA_MOUSE Alpha-soluble NSF attachment protein	29	3286.62	3770.82	2885.85	4089.6	3272.32	2808.62	2956.33	3327.75	3191.85	11.5996	11.9699	9.90181	12.1539	12.5874	10.5121	9.57213	10.8489	10.8542
sp|P09405|NUCL_MOUSE	Ncl	NUCL_MOUSE Nucleolin	29	4500.5	4740.27	5277.95	5632.55	3780.44	4258.59	5920.86	5680.14	5274	10.4578	9.90706	11.9232	11.0211	9.57437	10.4941	12.622	12.1922	11.8082
sp|Q61595-13|KTN1_MOUSE	Ktn1	KTN1_MOUSE Isoform 13 of Kinectin	29	4946.59	5374.85	5684.06	5941.8	4758.94	4449.73	6307.88	6217.15	5944.71	10.4197	10.1831	11.6401	10.5392	10.9257	9.93996	12.1898	12.0971	12.0654
sp|Q05D44|IF2P_MOUSE	Eif5b	IF2P_MOUSE Eukaryotic translation initiation factor 5B	29	3942.51	4421.63	4673.06	4937.07	3892.58	3622.33	5079.47	5231.87	4687.31	10.184	10.2728	11.7353	10.7388	10.959	9.92282	12.0372	12.4837	11.6663
sp|Q3UM45|PP1R7_MOUSE	Ppp1r7	PP1R7_MOUSE Protein phosphatase 1 regulatory subunit 7	28	2767.31	2623.07	2597.8	2751.34	2419.94	2621.02	2417.25	2673.06	2169.08	12.4864	10.6451	11.3955	10.4535	11.9007	12.5415	10.006	11.1411	9.43011
sp|Q80TV8|CLAP1_MOUSE	Clasp1	CLAP1_MOUSE CLIP-associating protein 1	28	4620.85	5231.37	5255.01	5892.69	4290.38	5138.75	5478.43	5278.31	5203.16	10.3986	10.5883	11.4967	11.1662	10.5229	12.2634	11.3102	10.972	11.2818
tr|D3YXJ0|D3YXJ0_MOUSE	Dgkh	D3YXJ0_MOUSE Diacylglycerol kinase	28	3620.59	4085.67	3888.55	4448.24	3304.21	3876.45	3892.59	4470.12	4219.51	10.5559	10.7137	11.0217	10.9205	10.4995	11.9853	10.4115	12.0386	11.8533
sp|Q60676|PPP5_MOUSE	Ppp5c	PPP5_MOUSE Serine/threonine-protein phosphatase 5	28	3881.98	4336.01	3952.45	4736.95	3366.05	3723.3	3667.28	3565.81	3572.92	11.6467	11.7005	11.5283	11.9671	11.0067	11.8462	10.0938	9.88213	10.3285
sp|P97434|MPRIP_MOUSE	Mprip	MPRIP_MOUSE Myosin phosphatase Rho-interacting protein	28	3325.08	3707.86	3643.01	4037.23	2897.59	3439.64	3834.44	3660.33	3678.81	10.7781	10.8099	11.4801	11.0195	10.2368	11.8237	11.4026	10.9597	11.4897
sp|P62715|PP2AB_MOUSE	Ppp2cb	PP2AB_MOUSE Serine/threonine-protein phosphatase 2A catalytic subunit beta isoform	28	1940.72	2285.63	1991.96	2485.39	1807.74	1947.01	1893.8	2070.49	1952.8	11.0316	11.6854	11.0079	11.8963	11.1995	11.7367	9.87579	10.8715	10.6954
sp|Q9Z0P4|PALM_MOUSE	Palm	PALM_MOUSE Paralemmin-1	28	2474.53	3128.57	2889.92	3233.31	2572.65	2865	3546.42	3470.85	3463.93	9.35199	10.6345	10.618	10.2896	10.5969	11.4825	12.296	12.1168	12.6137
tr|D3YUD3|D3YUD3_MOUSE	Inpp4a	D3YUD3_MOUSE Type I inositol 3,4-bisphosphate 4-phosphatase	28	3266.6	3708.6	3540.33	4065.4	3067.09	3243.29	3468.18	3616.8	3489.86	10.84	11.0689	11.4215	11.3599	11.0929	11.4135	10.5583	11.0866	11.1584
sp|Q8K212|PACS1_MOUSE	Pacs1	PACS1_MOUSE Phosphofurin acidic cluster sorting protein 1	28	3709.56	4116.71	3932.1	4318.8	3252.01	3568.43	4193.54	3936.63	3842.3	11.1112	11.0905	11.4501	10.8928	10.6164	11.3348	11.5234	10.8919	11.089
sp|P80318|TCPG_MOUSE	Cct3	TCPG_MOUSE T-complex protein 1 subunit gamma	28	3981.29	4362.08	4139.58	4878.49	3481.95	3776.56	4275.57	4145.09	4115.39	11.198	11.035	11.3193	11.5543	10.674	11.2646	11.0325	10.7694	11.153
tr|E9PWX1|E9PWX1_MOUSE	Dpp6	E9PWX1_MOUSE Dipeptidyl aminopeptidase-like protein 6	28	5652.14	6387.12	5725.93	6584.78	5000.32	5151.51	5603.7	5431.14	5237.17	11.624	11.8143	11.4481	11.4031	11.2079	11.2351	10.5725	10.3175	10.3777
sp|D3YVF0|AKAP5_MOUSE	Akap5	AKAP5_MOUSE A-kinase anchor protein 5	28	3186.87	3459.83	3175.74	3695.15	3202.28	3015.8	3458.55	3447.22	3223.47	11.1238	10.8619	10.7766	10.8608	12.1825	11.1633	11.0751	11.1148	10.8412
sp|Q5RJI5|BRSK1_MOUSE	Brsk1	BRSK1_MOUSE Serine/threonine-protein kinase BRSK1	28	3922.55	4520.19	4298.74	4903.84	3914.59	3967.43	4700.72	4875.7	4485.06	10.3475	10.7247	11.0244	10.8929	11.2549	11.0988	11.3761	11.8808	11.3998
sp|Q8BSS9|LIPA2_MOUSE	Ppfia2	LIPA2_MOUSE Liprin-alpha-2	28	3551.96	3876.83	3934.79	4407	3202.81	3436.94	4268.03	3888.36	3803.14	10.802	10.6041	11.6334	11.2855	10.6159	11.0843	11.9077	10.9231	11.144
sp|Q9CPV4|GLOD4_MOUSE	Glod4	GLOD4_MOUSE Glyoxalase domain-containing protein 4	28	5973.56	6560.45	5486.71	6857.79	5097.66	5292.12	6195.16	5777.45	5739.52	11.7819	11.6379	10.5206	11.3895	10.9582	11.0691	11.2097	10.5259	10.9073
tr|E9Q5W5|E9Q5W5_MOUSE	Zzef1	E9Q5W5_MOUSE Zinc finger ZZ-type and EF-hand domain-containing protein 1	28	3305.36	3819.87	3692.8	4078.69	3095.14	3208.21	3642.32	3739.39	3672.96	10.7053	11.1273	11.6274	11.1235	10.9257	11.0191	10.8223	11.1873	11.462
sp|A2AG50|MA7D2_MOUSE	Map7d2	MA7D2_MOUSE MAP7 domain-containing protein 2	28	4061.38	4577.75	4541.27	5299.92	3586.01	4066.58	5305.3	4926.31	4649.79	10.3672	10.51	11.2697	11.392	9.97672	11.0083	12.424	11.6159	11.4363
sp|Q3UU96|MRCKA_MOUSE	Cdc42bpa	MRCKA_MOUSE Serine/threonine-protein kinase MRCK alpha	28	4168.72	4857.42	4588.09	5160.56	4012.15	4036.33	4654.1	4589.07	4557.27	10.7175	11.232	11.4675	11.1719	11.2423	11.0047	10.9771	10.8982	11.289
sp|Q80TZ3|AUXI_MOUSE	Dnajc6	AUXI_MOUSE Putative tyrosine-protein phosphatase auxilin	28	3351.4	3912.45	3414.64	4115.54	3027.55	3069.71	3442.65	3457.66	3331.71	11.2565	11.8192	11.1499	11.6398	11.083	10.9339	10.608	10.7276	10.7822
sp|Q00493|CBPE_MOUSE	Cpe	CBPE_MOUSE Carboxypeptidase E	28	4923.1	5261.73	4639.47	5883.08	4164	4309.5	5375.21	4746.88	4492.26	11.7573	11.3021	10.7717	11.8308	10.8384	10.9143	11.7767	10.4717	10.337
sp|Q80Z38|SHAN2_MOUSE	Shank2	SHAN2_MOUSE SH3 and multiple ankyrin repeat domains protein 2	28	3257.9	3587.01	3556.1	3973.86	3033.53	3100.27	3906.22	3729.59	3478.66	10.7657	10.661	11.4241	11.0575	10.9254	10.8643	11.8419	11.3843	11.0758
sp|A2AAE1|K1109_MOUSE	Kiaa1109	K1109_MOUSE Uncharacterized protein KIAA1109	28	2104.18	2484.18	2454.69	2632.66	2145.16	2073.54	2443.44	2495.51	2299.9	10.3954	11.0383	11.7897	10.952	11.5506	10.8635	11.0744	11.3883	10.9478
sp|P26645|MARCS_MOUSE	Marcks	MARCS_MOUSE Myristoylated alanine-rich C-kinase substrate	28	3216.9	4557.37	4038.22	4151.43	3131.31	3650.57	5201.09	4654.39	4732.56	9.02295	11.497	11.0115	9.80501	9.57247	10.8586	13.3834	12.0591	12.7899
sp|O08810|U5S1_MOUSE	Eftud2	U5S1_MOUSE 116 kDa U5 small nuclear ribonucleoprotein component	28	3099.7	3329.67	3253.15	3667.42	2651.54	2827.93	3425.05	3504.59	3255.06	11.1701	10.792	11.397	11.1286	10.4142	10.8071	11.3231	11.6659	11.3021
sp|Q811P8|RHG32_MOUSE	Arhgap32	RHG32_MOUSE Rho GTPase-activating protein 32	28	2723.21	3254.91	3212.6	3489.19	2755.93	2722.02	3212.78	3478.62	3199.19	10.144	10.9051	11.634	10.9444	11.1888	10.7527	10.9792	11.9695	11.4823
sp|Q01815|CAC1C_MOUSE	Cacna1c	CAC1C_MOUSE Voltage-dependent L-type calcium channel subunit alpha-1C	28	3013.74	3257.47	3146.66	3569.16	2755.2	2721.78	3446.35	3218.48	3069.4	11.1663	10.8554	11.3345	11.1355	11.1262	10.6945	11.7146	11.0153	10.9577
sp|Q9D5V5|CUL5_MOUSE	Cul5	CUL5_MOUSE Cullin-5	28	4374.93	4773.97	4451.43	5018.31	4089.64	3895.86	4667.17	4808.32	4370.58	11.2916	11.0821	11.1694	10.9064	11.5042	10.6632	11.0509	11.4635	10.8688
sp|Q8VIJ6|SFPQ_MOUSE	Sfpq	SFPQ_MOUSE Splicing factor, proline- and glutamine-rich	28	3101.74	3308.13	3503.53	3910.15	2586.65	2871.8	3738.57	3539.55	3424.57	10.8303	10.3891	11.8929	11.4966	9.84375	10.6339	11.9758	11.4163	11.5214
sp|Q62351|TFR1_MOUSE	Tfrc	TFR1_MOUSE Transferrin receptor protein 1	28	4556.75	4803.78	4500.24	5266.52	3956.52	3757.81	4762.65	4515.19	3919.67	11.8972	11.2806	11.4228	11.5785	11.2587	10.4046	11.4077	10.8894	9.86052
tr|G3X8Y3|G3X8Y3_MOUSE	Naa15	G3X8Y3_MOUSE N-alpha-acetyltransferase 15, NatA auxiliary subunit	28	4796.96	5311.38	5297.8	5934.93	4600.34	4347.93	5311.48	5577.46	5199.04	10.8086	10.7639	11.605	11.2605	11.2974	10.3893	10.9794	11.6086	11.2872
tr|Q3UJB0|Q3UJB0_MOUSE	Sf3b2	Q3UJB0_MOUSE Protein Sf3b2	28	4276.15	4424.8	4911.36	5125.45	3867.02	4037.59	5858.77	5729.96	5328.02	10.2683	9.55649	11.4655	10.3637	10.1206	10.2817	12.9066	12.7097	12.3274
sp|P49025|CTRO_MOUSE	Cit	CTRO_MOUSE Citron Rho-interacting kinase	28	2462.13	2880.66	2929.6	3220.44	2603.56	2304.34	2901.54	3037.82	2655.31	10.2929	10.8313	11.9064	11.3366	11.8626	10.2158	11.128	11.7309	10.6956
sp|Q8BTI8|SRRM2_MOUSE	Srrm2	SRRM2_MOUSE Serine/arginine repetitive matrix protein 2	28	2615.93	2855.22	3251.61	3223.84	2514.68	2522.79	3888.63	3744.28	3430.23	9.75835	9.57968	11.7922	10.1266	10.224	9.98003	13.3079	12.9021	12.3292
sp|Q3TLH4|PRC2C_MOUSE	Prrc2c	PRC2C_MOUSE Protein PRRC2C	28	3138.43	3375.23	3812.38	3853.56	2959.15	2954.73	4417.23	4291.4	4122.97	9.97182	9.64553	11.7762	10.3101	10.2474	9.95589	12.8758	12.5951	12.6222
sp|Q3U0V1|FUBP2_MOUSE	Khsrp	FUBP2_MOUSE Far upstream element-binding protein 2	28	3902.63	3967.11	3637.78	4460.32	3234.05	3045.2	4362.27	4210.42	3856.08	11.7819	10.7719	10.6768	11.3387	10.6412	9.74932	12.0818	11.7415	11.2167
sp|P19536|COX5B_MOUSE	Cox5b	COX5B_MOUSE Cytochrome c oxidase subunit 5B, mitochondrial	27	3365.24	3803.25	4595.48	4480.96	4221.94	4704.74	5424.14	4996.04	5802.28	8.45554	8.59491	11.2254	9.4806	11.5618	12.5361	12.5031	11.5956	14.0471
tr|F7BJK1|F7BJK1_MOUSE	Pcdh1	F7BJK1_MOUSE Protein Pcdh1 (Fragment)	27	2546.34	2774.78	2622.76	2921.59	2444.82	2565.58	2778.5	2612.48	2557.21	11.1372	10.9156	11.1523	10.7601	11.6545	11.8999	11.1489	10.5549	10.7767
sp|B9EJA2|CTTB2_MOUSE	Cttnbp2	CTTB2_MOUSE Cortactin-binding protein 2	27	2722.26	3042.85	2944.21	3229.3	2194.42	2672.11	2928.18	2654.48	2712.41	11.3343	11.3948	11.9174	11.3218	9.95803	11.7984	11.1847	10.2091	10.8814
sp|Q60598|SRC8_MOUSE	Cttn	SRC8_MOUSE Src substrate cortactin	27	6391.55	6954.67	5508.37	6972.73	5014.19	5621.44	5980.91	5222.56	5453.61	12.5656	12.2975	10.528	11.543	10.744	11.7199	10.7871	9.48423	10.3306
sp|Q8BNW9|KBTBB_MOUSE	Kbtbd11	KBTBB_MOUSE Kelch repeat and BTB domain-containing protein 11	27	2276.01	2522.91	2168.39	2700.34	2062.64	2198.13	2220.65	2378.88	2269	11.4217	11.3873	10.5789	11.4108	11.2815	11.698	10.2235	11.0273	10.9712
tr|A7YQ68|A7YQ68_MOUSE	Prickle2	A7YQ68_MOUSE Prickle-like 2 (Drosophila)	27	3314.77	3788.81	3509.82	4086.26	3048.22	3378.35	3729.37	3619.04	3592.79	10.795	11.0977	11.1122	11.2056	10.8194	11.6674	11.1421	10.8869	11.2736
tr|H3BJD0|H3BJD0_MOUSE	Ppp1r9a	H3BJD0_MOUSE Protein Ppp1r9a	27	3452.96	3816.55	3579.04	4245.53	3013.02	3472.97	4004.03	3817.29	3755.8	10.884	10.82	10.9675	11.2685	10.3511	11.6091	11.5786	11.1146	11.4067
sp|Q03137|EPHA4_MOUSE	Epha4	EPHA4_MOUSE Ephrin type-A receptor 4	27	3900.62	4383.93	4022.03	4408.74	3507.46	3758.35	3997.22	3901.2	4037.75	11.3273	11.4503	11.3549	10.7807	11.1012	11.5741	10.649	10.4648	11.2978
tr|J3QN27|J3QN27_MOUSE	Kcnma1	J3QN27_MOUSE Calcium-activated potassium channel subunit alpha-1	27	3134.93	3665.49	3386.21	3934.4	2925.15	3163.74	3312.32	3504.79	3380.56	10.768	11.324	11.3075	11.3796	10.9507	11.5242	10.4376	11.1202	11.1882
sp|Q791T5|MTCH1_MOUSE	Mtch1	MTCH1_MOUSE Mitochondrial carrier homolog 1	27	3537.73	4303.55	3652.4	4639.17	3707.83	3610.91	3605.28	4035.25	3725.4	10.6045	11.6026	10.6437	11.7097	12.1136	11.4785	9.91442	11.1732	10.7597
sp|Q9QYA2|TOM40_MOUSE	Tomm40	TOM40_MOUSE Mitochondrial import receptor subunit TOM40 homolog	27	2712.74	2970.74	2750.27	3209.21	2341.08	2542.83	2834.75	2647.49	2532.21	11.5461	11.3724	11.3802	11.5017	10.86	11.4774	11.0688	10.4088	10.3846
sp|Q0VGY8|TANC1_MOUSE	Tanc1	TANC1_MOUSE Protein TANC1	27	2666.55	2851.85	2828.89	3046.99	2290.34	2585.67	2970.45	2992.05	2918.01	11.0708	10.6492	11.4181	10.6523	10.3638	11.3842	11.314	11.4747	11.6729
sp|A2A690|TANC2_MOUSE	Tanc2	TANC2_MOUSE Protein TANC2	27	4069.93	4582.19	4427.87	4821.04	3850.33	4023.43	4570.79	4622.82	4506.14	10.7602	10.896	11.3808	10.7328	11.0948	11.2805	11.0863	11.2897	11.4789
sp|P21278|GNA11_MOUSE	Gna11	GNA11_MOUSE Guanine nucleotide-binding protein subunit alpha-11	27	5031.08	5636.36	4819.9	6020.73	4519.32	4623.31	5224.52	4916.8	4680.58	11.5579	11.6461	10.7647	11.6468	11.3156	11.2635	11.011	10.4338	10.3605
tr|E9Q7C9|E9Q7C9_MOUSE	Klc1	E9Q7C9_MOUSE Kinesin light chain 1	27	4011.97	4532.99	3986.83	4731.72	3653.4	3797.67	4432.18	4193.28	4012	11.218	11.4	10.8376	11.1408	11.1338	11.261	11.3694	10.8306	10.8089
sp|E9Q8I9-2|FRY_MOUSE	Fry	FRY_MOUSE Isoform 2 of Protein furry homolog	27	3579.2	3851.03	4027.83	4204.02	3562.15	3539.55	3984.69	4216.12	3883.9	10.7075	10.3619	11.7144	10.5903	11.6145	11.2293	10.936	11.6508	11.1952
sp|Q91WG7|DGKG_MOUSE	Dgkg	DGKG_MOUSE Diacylglycerol kinase gamma	27	3261.81	3774.55	3592.64	4291.95	3140.79	3208.76	3482.95	3524.42	3389.81	10.7628	11.2019	11.5246	11.925	11.2951	11.228	10.5432	10.7422	10.7771
sp|Q4ACU6|SHAN3_MOUSE	Shank3	SHAN3_MOUSE SH3 and multiple ankyrin repeat domains protein 3	27	2911.63	3146.66	3181.6	3349.83	2592.1	2837.76	3604.98	3161.5	3250.37	10.8443	10.5408	11.5201	10.5057	10.5221	11.2083	12.3177	10.8767	11.6643
sp|Q91V41|RAB14_MOUSE	Rab14	RAB14_MOUSE Ras-related protein Rab-14	27	3399.65	3776.13	3218.9	3834.75	3157.18	3064.51	3290.25	3303.54	3199.77	11.7236	11.7121	10.7915	11.1353	11.8663	11.207	10.4092	10.5232	10.6318
sp|Q9D415|DLGP1_MOUSE	Dlgap1	DLGP1_MOUSE Disks large-associated protein 1	27	5027.7	5552.45	5054.62	6094.14	4303.7	4719.01	5518.65	5268	5170.07	11.2545	11.179	11	11.4871	10.4999	11.2023	11.3332	10.8929	11.151
sp|Q8JZN5|ACAD9_MOUSE	Acad9	ACAD9_MOUSE Acyl-CoA dehydrogenase family member 9, mitochondrial	27	3826.26	4298.69	4009.88	4567.67	3356.22	3575.67	4169.5	3964.55	3717.72	11.2682	11.3861	11.4804	11.327	10.7725	11.167	11.2648	10.7848	10.5492
sp|Q58A65-2|JIP4_MOUSE	Spag9	JIP4_MOUSE Isoform 2 of C-Jun-amino-terminal kinase-interacting protein 4	27	3889.75	4306.32	4049.53	4626.38	3498.7	3628.78	4132.65	4054.71	3874.49	11.2659	11.2179	11.4024	11.283	11.0443	11.1456	10.9808	10.8479	10.8123
sp|Q9JLB0-2|MPP6_MOUSE	Mpp6	MPP6_MOUSE Isoform Alpha of MAGUK p55 subfamily member 6	27	5030.64	5487.47	4788.64	5685.55	4638.53	4518.67	4935.32	4964.72	4805.21	11.6991	11.4779	10.8265	11.1337	11.757	11.144	10.5295	10.6651	10.7672
sp|P63158|HMGB1_MOUSE	Hmgb1	HMGB1_MOUSE High mobility group protein B1	27	4606.69	4833.64	4962.56	5566.58	4064.57	4601.56	5988.83	5787.88	5409.37	10.5107	9.91926	11.0077	10.6948	10.1075	11.134	12.5357	12.1984	11.8919
sp|P35436|NMDE1_MOUSE	Grin2a	NMDE1_MOUSE Glutamate receptor ionotropic, NMDA 2A	27	3296.02	3601.56	3219.17	3773.53	2858.1	3033.89	3689.5	3412.99	3384.56	11.376	11.1803	10.8017	10.967	10.7514	11.1046	11.6823	10.8812	11.2555
sp|P23242|CXA1_MOUSE	Gja1	CXA1_MOUSE Gap junction alpha-1 protein	27	2843.46	3263.34	2695.32	3519.72	2731.09	2588.12	2863.21	2928.94	2834.21	11.3073	11.6718	10.4201	11.7859	11.8369	10.9144	10.4455	10.7588	10.8594
sp|Q8R4U7|LUZP1_MOUSE	Luzp1	LUZP1_MOUSE Leucine zipper protein 1	27	2999.56	3243.8	3367.08	3545.21	2720.18	2837.14	3625.76	3267.1	3209.58	10.8735	10.5762	11.8662	10.8217	10.7473	10.9067	12.058	10.94	11.2105
sp|Q3UH68|LIMC1_MOUSE	Limch1	LIMC1_MOUSE LIM and calponin homology domains-containing protein 1	27	2988.67	3347.41	3091.54	3568.41	2794.7	2808.61	3292.27	3433.64	3263.56	10.9192	10.9998	10.9808	10.9781	11.1285	10.8819	11.035	11.588	11.4886
sp|Q64331|MYO6_MOUSE	Myo6	MYO6_MOUSE Unconventional myosin-VI	27	3641.42	4623.82	3873.68	4309.45	3386.87	3519.57	4253.7	4315.36	4130.98	10.5587	12.0587	10.9197	10.522	10.7035	10.8225	11.3153	11.5584	11.5413
sp|Q62095|DDX3Y_MOUSE	Ddx3y	DDX3Y_MOUSE ATP-dependent RNA helicase DDX3Y	27	3898.78	4250.34	4243.29	4800.56	3546.25	3631.16	4274.35	4355.79	4241.66	10.9403	10.7272	11.5758	11.3431	10.8457	10.8056	11.0036	11.2904	11.4683
sp|Q9D0F9|PGM1_MOUSE	Pgm1	PGM1_MOUSE Phosphoglucomutase-1	27	4489.31	4990.04	4632.46	5277.8	3895.65	4007.64	4891.33	4567.89	4443.84	11.3914	11.3884	11.4276	11.2769	10.7737	10.7842	11.3864	10.7067	10.8647
sp|Q8C2Q3|RBM14_MOUSE	Rbm14	RBM14_MOUSE RNA-binding protein 14	27	3883.36	4180.29	4062.88	4540.07	3400.69	3579.95	4621.13	4380.14	4211.8	11.0127	10.6624	11.2013	10.8415	10.5109	10.7662	12.0225	11.474	11.5084
sp|O55017|CAC1B_MOUSE	Cacna1b	CAC1B_MOUSE Voltage-dependent N-type calcium channel subunit alpha-1B	27	3576.36	3835.12	4091.36	4303.98	3416.84	3439.24	4431.13	4283.99	4085.7	10.5318	10.1578	11.7132	10.6726	10.9666	10.7405	11.9712	11.6534	11.5928
sp|Q80TK0|K1107_MOUSE	Kiaa1107	K1107_MOUSE Uncharacterized protein KIAA1107	27	3507.9	3965.12	4165.7	4429.71	3323.55	3396.6	4313.95	4263.76	3987.86	10.3732	10.5459	11.9757	11.0301	10.7116	10.6515	11.7031	11.6466	11.3623
sp|Q8BGN8|SYNPR_MOUSE	Synpr	SYNPR_MOUSE Synaptoporin	27	2981.47	3316.63	3158.59	3738.98	2942.57	2753.77	3431.14	3308.25	3072.04	10.8517	10.8574	11.1765	11.4594	11.673	10.6291	11.4569	11.1226	10.7735
sp|P61205|ARF3_MOUSE	Arf3	ARF3_MOUSE ADP-ribosylation factor 3	27	3750.54	3946.43	3039.97	3798.11	4261.96	3172.98	3620.66	4098.93	3445.07	11.7605	11.1301	9.26721	10.0286	14.5656	10.5512	10.4156	11.8726	10.4086
sp|Q9EPK7|XPO7_MOUSE	Xpo7	XPO7_MOUSE Exportin-7	27	3256.44	3770.54	3413.66	4028.69	3265.38	2966.93	3414.3	3675.68	3369.99	10.9135	11.3654	11.1221	11.369	11.9272	10.5445	10.4974	11.3788	10.882
sp|Q7TMK9|HNRPQ_MOUSE	Syncrip	HNRPQ_MOUSE Heterogeneous nuclear ribonucleoprotein Q	27	4102.23	4374.85	4408.47	5078.56	3834.94	3748.42	4744.43	4941.88	4620.1	10.7605	10.3213	11.2421	11.2174	10.9637	10.427	11.4171	11.9741	11.6768
sp|O55029|COPB2_MOUSE	Copb2	COPB2_MOUSE Coatomer subunit beta'	27	4542.24	4850.95	4450.33	5222.95	3965.29	3777.97	4735.9	4546.32	4368.9	11.7335	11.2705	11.1762	11.3609	11.164	10.3494	11.2233	10.8482	10.874
sp|Q6P5F9|XPO1_MOUSE	Xpo1	XPO1_MOUSE Exportin-1	26	5223.88	4956.96	5631.51	5352.73	4908.65	5356.89	4418.88	5721.83	4594.71	11.7492	10.0275	12.3136	10.1375	12.0327	12.777	9.11778	11.8875	9.95715
sp|P99029|PRDX5_MOUSE	Prdx5	PRDX5_MOUSE Peroxiredoxin-5, mitochondrial	26	5611.66	5709.52	5408.06	6248.21	4321.18	5301.55	5773.82	4920.86	5043.01	12.1204	11.0914	11.3557	11.3638	10.1722	12.1431	11.4407	9.81769	10.4949
sp|O55125|NIPS1_MOUSE	Nipsnap1	NIPS1_MOUSE Protein NipSnap homolog 1	26	2639.23	3792.89	3295.66	3883.73	2800.74	3236.25	3076.04	3881.08	3103.8	9.29078	12.009	11.2788	11.5123	10.7457	12.0814	9.93409	12.6203	10.5276
sp|Q9JLM8|DCLK1_MOUSE	Dclk1	DCLK1_MOUSE Serine/threonine-protein kinase DCLK1	26	2985.05	3372.61	3271.24	3676.29	2515.04	3098.35	3461.15	3185.34	3177.98	10.8544	11.0301	11.5641	11.2565	9.96748	11.9477	11.5461	10.6992	11.1344
sp|Q8CC35|SYNPO_MOUSE	Synpo	SYNPO_MOUSE Synaptopodin	26	1893.72	2096.1	1937.29	2343.35	1530.23	1922.16	2173.79	1976.2	2005.44	11.0784	11.029	11.018	11.5435	9.75675	11.9248	11.6665	10.6791	11.304
sp|Q9EQH3|VPS35_MOUSE	Vps35	VPS35_MOUSE Vacuolar protein sorting-associated protein 35	26	3807.45	4691.45	4478.97	5364.09	3358.63	3992.03	3941.96	4002.21	4003.24	10.5872	11.7332	12.108	12.5598	10.1788	11.7718	10.0559	10.2799	10.7256
sp|Q9R0Q6|ARC1A_MOUSE	Arpc1a	ARC1A_MOUSE Actin-related protein 2/3 complex subunit 1A	26	4360.28	4891.03	4252.24	4995.32	3690.48	4062.92	4312.94	4091.86	4096.71	11.7483	11.8528	11.1384	11.3335	10.8375	11.6091	10.6609	10.1841	10.6355
sp|Q8BKZ9|ODPX_MOUSE	Pdhx	ODPX_MOUSE Pyruvate dehydrogenase protein X component, mitochondrial	26	4308.94	4645.76	4029.39	4972.46	3628.02	3923.06	4331.58	3976.96	3896.54	11.9334	11.5721	10.8488	11.5959	10.951	11.5218	11.0053	10.1739	10.3977
sp|P97797|SHPS1_MOUSE	Sirpa	SHPS1_MOUSE Tyrosine-protein phosphatase non-receptor type substrate 1	26	2710.33	3061.43	2763.85	3142.58	2543.45	2635.39	2954.61	2949.97	2786.51	11.0697	11.246	10.9742	10.8078	11.322	11.4145	11.0707	11.1294	10.9657
sp|Q61768|KINH_MOUSE	Kif5b	KINH_MOUSE Kinesin-1 heavy chain	26	3879.67	4456.73	4344.03	4789.54	3457.35	3855.26	4451.75	4353.96	4212.65	10.7275	11.0836	11.6773	11.1515	10.4191	11.3046	11.2926	11.1206	11.2233
sp|Q99JY0|ECHB_MOUSE	Hadhb	ECHB_MOUSE Trifunctional enzyme subunit beta, mitochondrial	26	3331.29	3786.54	3410.28	4023.38	3045.73	3145.44	3453.11	3419.91	3221.56	11.2824	11.5343	11.2286	11.4741	11.2426	11.2972	10.729	10.699	10.5128
sp|Q80TL4|K1045_MOUSE	Kiaa1045	K1045_MOUSE Protein KIAA1045	26	4041.71	4600.9	4147.79	4653.27	3758.42	3832.37	4326.22	4353.42	4044.29	11.1717	11.4383	11.146	10.8306	11.3226	11.2337	10.9705	11.1155	10.7711
sp|Q921I1|TRFE_MOUSE	Tf	TRFE_MOUSE Serotransferrin	26	5237.15	5781.97	4400.17	5423.66	4382.43	4602.87	5064.76	5440.52	5057.54	12.0436	11.9591	9.83732	10.5025	10.9841	11.2251	10.6852	11.5569	11.2063
sp|P57746|VATD_MOUSE	Atp6v1d	VATD_MOUSE V-type proton ATPase subunit D	26	3955.04	4176.19	4082.68	4563.63	3523.92	3661.63	4308.57	4002.05	3864.36	11.4242	10.8497	11.4648	11.1001	11.094	11.2163	11.4175	10.6782	10.7551
sp|Q9D0E1|HNRPM_MOUSE	Hnrnpm	HNRPM_MOUSE Heterogeneous nuclear ribonucleoprotein M	26	3616.27	4169.96	3987.96	4559.44	3304.35	3578.98	3809.28	4302.2	4127.6	10.6594	11.0552	11.428	11.3168	10.6156	11.1875	10.3009	11.7139	11.7228
sp|Q61290|CAC1E_MOUSE	Cacna1e	CAC1E_MOUSE Voltage-dependent R-type calcium channel subunit alpha-1E	26	3599.71	3874.71	3675.59	3996.75	3258.43	3410.24	4134.63	4000.49	3819.11	11.1241	10.7695	11.0426	10.4002	10.9747	11.1759	11.7218	11.4196	11.3716
sp|P35762|CD81_MOUSE	Cd81	CD81_MOUSE CD81 antigen	26	1799.38	2075.44	1824.95	2197.12	1746.33	1699.35	1851.49	1904.65	1755.61	11.1449	11.5618	10.9888	11.459	11.7887	11.1619	10.5205	10.8971	10.4772
sp|O70589-3|CSKP_MOUSE	Cask	CSKP_MOUSE Isoform 3 of Peripheral plasma membrane protein CASK	26	4471.81	5159.19	4822.18	5418.08	4180.53	4311.52	4844.39	4894.37	4697.45	10.9115	11.3226	11.4391	11.1324	11.1178	11.1566	10.8443	11.0316	11.044
tr|B1ART1|B1ART1_MOUSE	Vps13d	B1ART1_MOUSE Protein Vps13d	26	2645.23	2825.18	2869.84	3054.28	2452.39	2506.79	3012.31	2835.15	2772.2	11.0527	10.6173	11.6576	10.7462	11.1682	11.1077	11.5469	10.9427	11.1607
sp|Q6ZPQ6|PITM2_MOUSE	Pitpnm2	PITM2_MOUSE Membrane-associated phosphatidylinositol transfer protein 2	26	3385.45	3553.44	3453.91	3863.49	2903.9	3211.3	3902.36	3993.75	3795.27	11.0315	10.4142	10.9414	10.6007	10.313	11.0968	11.6656	12.021	11.9158
tr|G3X922|G3X922_MOUSE	Dnajc13	G3X922_MOUSE MCG115602	26	2685.61	3127.06	2900.26	3303.43	2679.79	2604.79	2802.56	3061.05	2829.25	10.7825	11.2921	11.3204	11.1682	11.7264	11.0905	10.3227	11.3524	10.9449
sp|A2AWA9|RBGP1_MOUSE	Rabgap1	RBGP1_MOUSE Rab GTPase-activating protein 1	26	3574.09	4247.78	3959.02	4517.26	3392.4	3455.6	3809.51	3877.14	3697.29	10.8149	11.5606	11.6464	11.5099	11.1879	11.0887	10.5751	10.837	10.7796
sp|Q99MI1-2|RB6I2_MOUSE	Erc1	RB6I2_MOUSE Isoform 2 of ELKS/Rab6-interacting/CAST family member 1	26	3626.36	4051.29	4126.16	4501.61	3491.02	3477.22	3955.86	3831.74	3658.67	10.9036	10.9561	12.0613	11.3974	11.4404	11.0875	10.9119	10.6423	10.5995
sp|P41216|ACSL1_MOUSE	Acsl1	ACSL1_MOUSE Long-chain-fatty-acid--CoA ligase 1	26	3559.84	3982.51	3614.77	4129.75	3236.1	3248.84	3773.93	3780.87	3589.33	11.2943	11.3644	11.1495	11.033	11.1902	10.9309	10.9846	11.0806	10.9725
sp|Q9EPU0|RENT1_MOUSE	Upf1	RENT1_MOUSE Regulator of nonsense transcripts 1	26	3368.33	3582.79	3514.2	4018.89	2960.44	3125.38	3781.37	3813.03	3670.26	11.0583	10.5792	11.2162	11.1101	10.5929	10.8812	11.3889	11.5633	11.6099
sp|O08528|HXK2_MOUSE	Hk2	HXK2_MOUSE Hexokinase-2	26	2619.36	2863.64	2673.58	3004.85	2381.15	2364.64	2892.41	2797.74	2608.52	11.3008	11.1121	11.2138	10.9163	11.1967	10.8188	11.4482	11.1497	10.8435
tr|A2A7S7|A2A7S7_MOUSE	Yars	A2A7S7_MOUSE Tyrosine--tRNA ligase, cytoplasmic	26	5326.06	5588.6	5284.69	6162.86	4595.05	4698.67	5944.88	5449.25	5210.35	11.5337	10.8849	11.1257	11.2378	10.8452	10.7904	11.8104	10.9003	10.8715
sp|Q9JKY5|HIP1R_MOUSE	Hip1r	HIP1R_MOUSE Huntingtin-interacting protein 1-related protein	26	4633.78	5171.14	4728.42	5423.57	4282.3	4150.78	5096.68	4839.91	4486.71	11.3054	11.3475	11.2154	11.1423	11.3872	10.7395	11.4078	10.9076	10.5473
tr|E9QAU4|E9QAU4_MOUSE	Etl4	E9QAU4_MOUSE Sickle tail protein	26	4051.02	4518.9	4296.85	4828.93	3449.07	3624.9	4434.72	4329.86	4055.68	11.2723	11.3094	11.6237	11.3145	10.4601	10.6965	11.3207	11.1291	10.8736
sp|P80560|PTPR2_MOUSE	Ptprn2	PTPR2_MOUSE Receptor-type tyrosine-protein phosphatase N2	26	2595.51	2906.38	2698.18	3250.28	2339.06	2386.27	2954.42	2953.29	2710.62	10.9517	11.0299	11.0682	11.5483	10.7569	10.6777	11.4365	11.5108	11.0202
sp|P50247|SAHH_MOUSE	Ahcy	SAHH_MOUSE Adenosylhomocysteinase	26	6015.94	6609.8	5558.58	6698.23	5184.2	5158.36	6232.14	6209.2	5906.85	11.7338	11.5954	10.5401	11.0011	11.0206	10.6696	11.1515	11.187	11.1008
sp|Q9WVQ1|MAGI2_MOUSE	Magi2	MAGI2_MOUSE Membrane-associated guanylate kinase, WW and PDZ domain-containing protein 2	26	3586.97	3944.35	3418.77	4003.32	3179.15	3020.82	3602.68	3536.36	3677.17	11.7173	11.5888	10.8572	11.0119	11.3188	10.4647	10.7966	10.6708	11.5738
sp|Q6A0A9|F120A_MOUSE	FAM120A	F120A_MOUSE Constitutive coactivator of PPAR-gamma-like protein 1	26	3682.51	4184.86	4397.56	4729.64	3655.77	3614.03	4486.53	5054.86	4646.83	10.0112	10.2326	11.6225	10.8271	10.832	10.4192	11.1896	12.6938	12.172
sp|Q6P5D8|SMHD1_MOUSE	Smchd1	SMHD1_MOUSE Structural maintenance of chromosomes flexible hinge domain-containing protein 1	26	2915.81	3177.64	3302.07	3457.2	2856.18	2742.34	3576.18	3815.43	3371.86	10.4246	10.218	11.4772	10.408	11.1295	10.3974	11.7296	12.6005	11.6154
tr|S4R2K9|S4R2K9_MOUSE	Ank3	S4R2K9_MOUSE Ankyrin-3 (Fragment)	26	2556.58	2703.82	3005.91	3177.87	2263.15	2508.68	3808.35	3488.04	3326.73	9.97308	9.48656	11.3997	10.4387	9.6221	10.378	13.6291	12.5688	12.504
sp|Q5DTL9|S4A10_MOUSE	Slc4a10	S4A10_MOUSE Sodium-driven chloride bicarbonate exchanger	26	3918.82	4506.09	4540.73	4797.4	3656.04	3443.86	3982.54	4311.87	3672.1	11.1212	11.5016	12.5276	11.4642	11.3082	10.3644	10.3686	11.3033	10.0409
sp|Q6NZJ6|IF4G1_MOUSE	Eif4g1	IF4G1_MOUSE Eukaryotic translation initiation factor 4 gamma 1	26	2920.37	3319.27	3641.95	3742.3	2541.3	2825.38	3997.03	3732.13	3667.57	10.0662	10.2903	12.2041	10.8619	9.54704	10.3277	12.6393	11.8829	12.1805
sp|O35551|RABE1_MOUSE	Rabep1	RABE1_MOUSE Rab GTPase-binding effector protein 1	26	3414.37	3660.78	3029.92	3748.67	3033.59	2699.67	3447.34	3158.19	3027.83	12.2048	11.7694	10.5292	11.2833	11.8185	10.2337	11.3049	10.4279	10.4283
sp|Q9Z2D6|MECP2_MOUSE	Mecp2	MECP2_MOUSE Methyl-CpG-binding protein 2	26	4356.47	4671.51	4625.69	5327.21	4035.85	4017.35	5706.6	5735.09	5284.06	10.4162	10.046	10.7522	10.7254	10.5171	10.1862	12.5173	12.6664	12.1732
sp|Q61656|DDX5_MOUSE	Ddx5	DDX5_MOUSE Probable ATP-dependent RNA helicase DDX5	26	4537.42	4814.2	5055.16	5488.34	4162.02	3954.08	5418.36	5329.92	4850.75	10.8809	10.3834	11.7852	11.0825	10.8779	10.0555	11.9202	11.8064	11.208
sp|Q8VDP4|CCAR2_MOUSE	Ccar2	CCAR2_MOUSE Cell cycle and apoptosis regulator protein 2	26	4040.37	4381.65	4845.64	4954.36	3842.56	3737.59	5642.14	5575.7	5096.26	10.0376	9.79053	11.7032	10.3642	10.4044	9.8469	12.8592	12.7952	12.1989
sp|O09044|SNP23_MOUSE	Snap23	SNP23_MOUSE Synaptosomal-associated protein 23	25	2628.92	2759.81	2619.36	2976.47	2412.56	2875.07	3336.87	3307.81	3295.95	10.4593	9.87561	10.1313	9.9716	10.4614	12.1303	12.1794	12.1564	12.6347
sp|Q8BH95|ECHM_MOUSE	Echs1	ECHM_MOUSE Enoyl-CoA hydratase, mitochondrial	25	3952.7	4757.35	4002.07	5077.65	3697.15	4132.84	4038.12	4377.42	4092.48	10.8289	11.7224	10.6591	11.7136	11.0393	12.0071	10.1491	11.0777	10.8028
sp|Q9CQJ8|NDUB9_MOUSE	Ndufb9	NDUB9_MOUSE NADH dehydrogenase [ubiquinone] 1 beta subcomplex subunit 9	25	1922.19	2271.65	2220.39	2536.48	1714.59	2062.93	2133.89	2124.14	2161.4	10.4931	11.1535	11.7838	11.6595	10.2013	11.9425	10.6867	10.7111	11.3686
sp|Q60841|RELN_MOUSE	Reln	RELN_MOUSE Reelin	25	2473.03	2945.95	2543.74	3090.02	2309.74	2485.06	2499.37	2478.02	2271.88	11.1794	11.9778	11.1792	11.7623	11.3799	11.9132	10.3653	10.3475	9.89548
sp|Q99L47|F10A1_MOUSE	St13	F10A1_MOUSE Hsc70-interacting protein	25	3221.59	3442.37	3529.06	4099.87	2609.59	3413.79	4178.26	3856.39	4030.06	10.4111	10.0057	11.0875	11.1567	9.19149	11.6994	12.3875	11.5119	12.5487
sp|P12787|COX5A_MOUSE	Cox5a	COX5A_MOUSE Cytochrome c oxidase subunit 5A, mitochondrial	25	3087.58	3090.8	3304	3683.94	3085.84	3253.66	3983.76	3662.58	3703.89	10.4303	9.39097	10.8509	10.4793	11.3616	11.656	12.3462	11.429	12.0559
sp|Q9QXY6|EHD3_MOUSE	Ehd3	EHD3_MOUSE EH domain-containing protein 3	25	3343.3	3215.7	3368.61	3453.3	2948.59	3052.1	3269.99	3493	2989.3	11.9509	10.3386	11.7063	10.3944	11.4875	11.5697	10.7234	11.5336	10.2957
sp|Q9DCS9|NDUBA_MOUSE	Ndufb10	NDUBA_MOUSE NADH dehydrogenase [ubiquinone] 1 beta subcomplex subunit 10	25	2902.66	3275.86	2982.31	3711.27	2808.25	2856.83	2927.21	3051.29	2885.55	11.0586	11.2251	11.0459	11.906	11.6607	11.5422	10.231	10.7381	10.5924
sp|P31938|MP2K1_MOUSE	Map2k1	MP2K1_MOUSE Dual specificity mitogen-activated protein kinase kinase 1	25	6758.65	6894.98	6758.93	7661.55	4678.69	6012.73	6975.89	6100.26	6113.95	12.2033	11.1973	11.8643	11.6486	9.20724	11.513	11.5552	10.1744	10.6366
sp|P50580|PA2G4_MOUSE	Pa2g4	PA2G4_MOUSE Proliferation-associated protein 2G4	25	3526.86	3695.95	3825.29	4201.5	3224.21	3387.16	3530.68	3904.89	3507.93	11.2178	10.5732	11.8285	11.2528	11.1771	11.4249	10.3024	11.4728	10.7506
sp|P03911|NU4M_MOUSE	Mtnd4	NU4M_MOUSE NADH-ubiquinone oxidoreductase chain 4	25	3149.47	3287.32	3019.86	3504.51	2926.14	2951.62	3320.04	3345.04	3074.82	11.4899	10.7866	10.7106	10.7658	11.6349	11.4193	11.1118	11.2726	10.8084
sp|Q8CJ19|MICA3_MOUSE	Mical3	MICA3_MOUSE Protein-methionine sulfoxide oxidase MICAL3	25	2903.04	3213.81	3254.28	3473.21	2616.46	2895.64	3352.93	3316.57	3158.85	10.7569	10.7107	11.723	10.8369	10.5666	11.3784	11.3978	11.3518	11.2779
sp|A2ASQ1|AGRIN_MOUSE	Agrn	AGRIN_MOUSE Agrin	25	2131.56	2597.5	2351.76	2530.65	2025.11	2119.41	2237.7	2357.92	2289.38	10.7782	11.8131	11.5608	10.7751	11.1605	11.3648	10.3803	11.0133	11.1539
sp|Q925I1|ATAD3_MOUSE	Atad3	ATAD3_MOUSE ATPase family AAA domain-containing protein 3	25	4328.98	4785.51	4652.94	5312.38	3874.62	4241.14	4924.94	4642.35	4634.72	10.9255	10.8629	11.4165	11.2898	10.6579	11.3512	11.403	10.8227	11.2705
sp|Q5DTT2|PSD1_MOUSE	Psd	PSD1_MOUSE PH and SEC7 domain-containing protein 1	25	2869.16	3144.14	2883.96	3359.92	2469.17	2714.61	3147.84	3004.07	2909.57	11.311	11.1483	11.053	11.1536	10.6092	11.3489	11.3846	10.9395	11.0519
sp|P48193|41_MOUSE	Epb41	41_MOUSE Protein 4.1	25	3795.47	4174.83	3759.45	4365.72	3416.68	3544.69	3901.62	3820.14	3820.07	11.4483	11.326	11.0242	11.0884	11.2322	11.3385	10.7965	10.6438	11.1022
sp|Q9DCW4|ETFB_MOUSE	Etfb	ETFB_MOUSE Electron transfer flavoprotein subunit beta	25	4401.83	4936.2	4116.02	5307.04	4004.13	4027.34	4222.66	4355.99	3998.34	11.6769	11.7774	10.6149	11.8546	11.5768	11.3295	10.2764	10.6739	10.2196
sp|Q6PGN3-3|DCLK2_MOUSE	Dclk2	DCLK2_MOUSE Isoform 3 of Serine/threonine-protein kinase DCLK2	25	3073.77	3663.65	3555.42	3970.97	2862.36	3134.67	3619.61	3375.61	3455.47	10.4616	11.2151	11.7643	11.3806	10.6179	11.3141	11.3019	10.6126	11.3318
sp|Q62407|SPEG_MOUSE	Speg	SPEG_MOUSE Striated muscle-specific serine/threonine-protein kinase	25	2228.35	2572.1	2562.58	2807.58	2163.09	2313.75	2704.3	2728.7	2595.65	10.2638	10.6555	11.4749	10.8892	10.8589	11.3016	11.4272	11.6097	11.5194
sp|Q3UH60|DIP2B_MOUSE	Dip2b	DIP2B_MOUSE Disco-interacting protein 2 homolog B	25	3299.58	3827.37	3562.96	3977.96	3080.29	3207.16	3602.46	3547.24	3393.2	10.9385	11.412	11.483	11.1045	11.1296	11.2751	10.9562	10.8625	10.8385
sp|P27612|PLAP_MOUSE	Plaa	PLAP_MOUSE Phospholipase A-2-activating protein	25	4164.95	4880.62	4380.93	4944.81	3819.5	4017.08	4509.84	4355.62	4400.92	11.0179	11.6125	11.2669	11.0149	11.0125	11.2694	10.9449	10.6434	11.2175
sp|Q8BLR2|CPNE4_MOUSE	Cpne4	CPNE4_MOUSE Copine-4	25	2292.12	2765.92	2624.83	2937.83	2252.59	2320.79	2603.96	2580.06	2485.2	10.4719	11.3655	11.6583	11.3019	11.2165	11.244	10.914	10.8882	10.9398
sp|Q99K85|SERC_MOUSE	Psat1	SERC_MOUSE Phosphoserine aminotransferase	25	6178.91	6620.02	5304.31	6674.2	5007.64	5208.85	5943.4	5462.01	5465.9	12.4435	11.9908	10.3849	11.3179	10.9913	11.1243	10.9806	10.1607	10.606
sp|P68040|GBLP_MOUSE	Gnb2l1	GBLP_MOUSE Guanine nucleotide-binding protein subunit beta-2-like 1	25	4486.94	4862.67	4150.53	5427.55	3923.16	4016.07	4412.43	4428.16	4345.97	11.7072	11.4114	10.5281	11.9246	11.1564	11.1123	10.5619	10.6725	10.9257
sp|P52480-2|KPYM_MOUSE	Pkm	KPYM_MOUSE Isoform M1 of Pyruvate kinase PKM	25	1606.47	1705.72	1581.36	1829.49	1411.44	1410.53	1577.1	1442.13	1519.49	11.9036	11.3677	11.3915	11.4149	11.3987	11.0838	10.7207	9.87074	10.8484
sp|Q6ZWX6|IF2A_MOUSE	Eif2s1	IF2A_MOUSE Eukaryotic translation initiation factor 2 subunit 1	25	3416.01	3733.46	3364.59	4099.06	3032.25	3089.43	3492.67	3468	3304.64	11.5136	11.3178	11.0248	11.6336	11.1389	11.0426	10.7996	10.7972	10.7319
sp|Q7TMF3|NDUAC_MOUSE	Ndufa12	NDUAC_MOUSE NADH dehydrogenase [ubiquinone] 1 alpha subcomplex subunit 12	25	2628.65	2822.68	2487.6	3009.38	2362.43	2347.55	2732.1	2632.72	2516.61	11.6584	11.2597	10.7258	11.2388	11.4196	11.0413	11.1164	10.7857	10.7543
sp|Q9CQI3|GMFB_MOUSE	Gmfb	GMFB_MOUSE Glia maturation factor beta	25	4519.72	4931.2	4293.02	5201.53	4194.58	4061.6	4632.07	4554.28	4325.05	11.5858	11.3691	10.6985	11.2275	11.7189	11.041	10.893	10.7838	10.6823
sp|Q8K010|OPLA_MOUSE	Oplah	OPLA_MOUSE 5-oxoprolinase	25	2715.37	3186.88	2826.1	3190.88	2494.68	2549.63	3010.28	2867.04	2855.29	11.0381	11.6518	11.1686	10.9223	11.0527	10.9911	11.2262	10.7656	11.1835
sp|Q60610|TIAM1_MOUSE	Tiam1	TIAM1_MOUSE T-lymphoma invasion and metastasis-inducing protein 1	25	3467.78	3698.4	3874.01	4162.34	3187.24	3364.68	3965.64	4284.04	4019.88	10.6452	10.2113	11.5614	10.7592	10.6636	10.9534	11.1681	12.1478	11.8899
sp|Q6ZQ08|CNOT1_MOUSE	Cnot1	CNOT1_MOUSE CCR4-NOT transcription complex subunit 1	25	2820.38	3057.65	3114.39	3251.68	2575.41	2697.27	3388.34	3338	3067.36	10.785	10.5163	11.5779	10.4703	10.7336	10.938	11.8867	11.7907	11.3016
sp|A2ALS5|RPGP1_MOUSE	Rap1gap	RPGP1_MOUSE Rap1 GTPase-activating protein 1	25	4249.25	4734.48	4371.19	4918.35	3793.19	3874.37	4678.93	4414.25	4215.29	11.3093	11.3333	11.3102	11.0226	11.0031	10.9352	11.4244	10.8523	10.8097
sp|P68510|1433F_MOUSE	Ywhah	1433F_MOUSE 14-3-3 protein eta	25	3501.87	3910.17	3455.66	4161.67	3097.11	3177.98	3887.33	3660.49	3519.85	11.3083	11.3567	10.8486	11.3163	10.9003	10.883	11.5162	10.9188	10.9517
sp|Q921M3|SF3B3_MOUSE	Sf3b3	SF3B3_MOUSE Splicing factor 3B subunit 3	25	3023.73	3170.54	3274.8	3476.18	2484.65	2747.6	3429.73	3389.93	3135.99	11.2376	10.598	11.832	10.8785	10.0642	10.8289	11.6936	11.6375	11.2296
sp|Q9D8B3|CHM4B_MOUSE	Chmp4b	CHM4B_MOUSE Charged multivesicular body protein 4b	25	3522.03	3815.12	3659.17	4297.52	3270.01	3286.89	3975.01	4225.48	3667.29	10.9168	10.6358	11.0263	11.2165	11.0468	10.8041	11.3032	12.0981	10.9524
tr|E9PZ43|E9PZ43_MOUSE	Map4	E9PZ43_MOUSE Microtubule-associated protein	25	3960.49	4409.57	4228.81	4412.72	3807.81	3659.9	4389.6	4466.57	4484.57	10.9229	10.9382	11.3384	10.2479	11.4459	10.7043	11.1064	11.379	11.9171
sp|P21271|MYO5B_MOUSE	Myo5b	MYO5B_MOUSE Unconventional myosin-Vb	25	3474.22	3913.99	3792.85	4251.83	3502.93	3293.25	4091.51	4174.19	3732.88	10.5991	10.7397	11.2493	10.9226	11.6474	10.6546	11.4513	11.7632	10.9728
sp|Q8K3J1|NDUS8_MOUSE	Ndufs8	NDUS8_MOUSE NADH dehydrogenase [ubiquinone] iron-sulfur protein 8, mitochondrial	25	4049.04	4444.09	3763.31	4570.37	3609.46	3494.84	4265.81	4205.45	3957.15	11.6337	11.4845	10.5119	11.0575	11.3031	10.6486	11.2442	11.1614	10.955
tr|D3YUS5|D3YUS5_MOUSE	Rasal2	D3YUS5_MOUSE Protein Rasal2	25	2937.85	3204.86	3132.67	3529.2	2820.47	2681.8	3169.14	3353.93	3128	10.9723	10.7656	11.3745	11.099	11.481	10.6218	10.8586	11.5708	11.2564
sp|P08003|PDIA4_MOUSE	Pdia4	PDIA4_MOUSE Protein disulfide-isomerase A4	25	5915.38	6313.3	5848.02	6975.34	5308.1	5162.84	6598.04	5969.64	6040.79	11.4195	10.9618	10.9754	11.3388	11.1684	10.5695	11.6853	10.6452	11.2362
sp|Q5SV85-2|SYNRG_MOUSE	Synrg	SYNRG_MOUSE Isoform 2 of Synergin gamma	25	3230.32	3630.74	3243.31	3814.02	2842.91	2807.41	3623.42	3302.45	3150.91	11.3957	11.52	11.1232	11.3297	10.9306	10.5027	11.7267	10.7615	10.7101
sp|Q9CW03|SMC3_MOUSE	Smc3	SMC3_MOUSE Structural maintenance of chromosomes protein 3	25	2866	3157.25	3276.1	3452.93	2867.42	2744.74	3642.29	3716.06	3387.46	10.2827	10.1883	11.4271	10.4318	11.2127	10.4432	11.9885	12.3156	11.7103
sp|O88738|BIRC6_MOUSE	Birc6	BIRC6_MOUSE Baculoviral IAP repeat-containing protein 6	25	2538.43	2840.62	2946.09	3053.06	2411.19	2308.33	3014.72	2915.09	2743.37	10.708	10.7775	12.0819	10.8447	11.0857	10.3262	11.6668	11.3589	11.1504
sp|Q9Z1X4|ILF3_MOUSE	Ilf3	ILF3_MOUSE Interleukin enhancer-binding factor 3	25	2885.21	3115.13	3567.13	3863.65	2727.14	2778.99	3749.75	3740.14	3575.75	10.0643	9.77332	12.0968	11.3486	10.3681	10.28	11.9996	12.0513	12.018
tr|Q921K2|Q921K2_MOUSE	Parp1	Q921K2_MOUSE Poly (ADP-ribose) polymerase family, member 1	25	2903.63	3031.04	3315.15	3410.14	2767.6	2619.64	3391.51	3645.35	3245.72	10.7047	10.0505	11.8819	10.5864	11.1205	10.2418	11.4707	12.4141	11.5294
sp|Q99NB9|SF3B1_MOUSE	Sf3b1	SF3B1_MOUSE Splicing factor 3B subunit 1	25	3523.87	3766.17	3794.98	3997.68	3254.32	3062.08	4131.21	4198.11	3688.69	11.0179	10.5911	11.5355	10.5251	11.0899	10.1531	11.85	12.1248	11.1126
sp|Q8BXR1|S7A14_MOUSE	Slc7a14	S7A14_MOUSE Probable cationic amino acid transporter	25	3196.39	3399.69	3677.07	3935.55	2975.05	2808.6	3993.86	3874.51	3784.87	10.5653	10.107	11.816	10.9539	10.7178	9.84495	12.1109	11.8299	12.0541
sp|Q61687|ATRX_MOUSE	Atrx	ATRX_MOUSE Transcriptional regulator ATRX	25	2904.39	3037.65	3442.56	3432.01	2633.57	2581.34	3671.7	3995.69	3485.55	10.4105	9.79296	11.9962	10.3587	10.2884	9.81207	12.0738	13.2296	12.0378
tr|J3QQ16|J3QQ16_MOUSE	Col6a3	J3QQ16_MOUSE Protein Col6a3	24	1634.54	3008.95	2754.22	1946.38	1922.72	2791.31	3087.43	4349.29	4204.82	6.64056	10.9948	10.8781	6.6585	8.51358	12.0259	11.5072	16.3218	16.4596
sp|Q80UG5|SEPT9_MOUSE	2017-09-09	SEPT9_MOUSE Septin-9	24	2709.99	3197.62	2987.01	3375.24	2270.9	2760.1	2931.03	2899.22	2728.71	10.9582	11.6294	11.7423	11.4925	10.0082	11.8358	10.8731	10.8291	10.6314
sp|Q61553|FSCN1_MOUSE	Fscn1	FSCN1_MOUSE Fascin	24	3931.94	4583.78	3915.3	4669.4	3782.78	3827.42	3822.28	4091.57	3901.72	11.2277	11.7725	10.8691	11.2275	11.7728	11.5901	10.013	10.7923	10.735
tr|Q4VA93|Q4VA93_MOUSE	Prkca	Q4VA93_MOUSE Protein kinase C	24	2273.03	2683.08	2466.39	2988.02	2249.78	2375.3	2555.07	2532.15	2745.22	10.3795	11.0196	10.9491	11.4893	11.1969	11.5025	10.7038	10.6808	12.0784
sp|O70161|PI51C_MOUSE	Pip5k1c	PI51C_MOUSE Phosphatidylinositol 4-phosphate 5-kinase type-1 gamma	24	2599.26	2910.49	2707.63	3011.98	2334.63	2512	2909.09	2758.55	2620.2	11.1386	11.2178	11.2802	10.8686	10.904	11.4157	11.4367	10.9195	10.8188
sp|Q80U63|MFN2_MOUSE	Mfn2	MFN2_MOUSE Mitofusin-2	24	3118.01	3337.42	3345.63	3615.68	2959.04	2984.97	3199.11	3313.31	3045.89	11.2411	10.8219	11.7261	10.9764	11.627	11.4122	10.5808	11.034	10.5805
sp|Q91WC3|ACSL6_MOUSE	Acsl6	ACSL6_MOUSE Long-chain-fatty-acid--CoA ligase 6	24	2921.26	3342.32	2991.86	3556.94	2748.62	2846.18	2959.84	3161.54	3125.12	11.0269	11.3473	10.9792	11.3058	11.308	11.3932	10.2498	11.0236	11.3661
sp|O08532|CA2D1_MOUSE	Cacna2d1	CA2D1_MOUSE Voltage-dependent calcium channel subunit alpha-2/delta-1	24	3174.03	3602.31	3360.11	3884.36	2813.68	3075.72	3423.97	3319.61	3263.74	11.0856	11.3159	11.409	11.4237	10.7105	11.3918	10.9708	10.7096	10.9831
sp|Q61937|NPM_MOUSE	Npm1	NPM_MOUSE Nucleophosmin	24	4935.41	4933.81	4608.12	5517.03	4186.94	4521.15	5230	5294.15	5012.3	11.6472	10.4723	10.5723	10.9633	10.7692	11.3148	11.323	11.5408	11.3972
sp|Q5F2E8|TAOK1_MOUSE	Taok1	TAOK1_MOUSE Serine/threonine-protein kinase TAO1	24	3385.59	3858.11	3773.98	4270.93	3090.88	3422.35	3988.22	3938.04	3823.41	10.5472	10.8103	11.4301	11.2038	10.4947	11.3065	11.3984	11.3324	11.4766
sp|Q7TME0|LPPR4_MOUSE	Lppr4	LPPR4_MOUSE Lipid phosphate phosphatase-related protein type 4	24	2378.52	2549.47	2425.44	2771.98	2172.62	2224.87	2554.21	2385.53	2336.81	11.3862	10.977	11.2878	11.1739	11.3356	11.2948	11.2174	10.5487	10.7785
sp|Q69ZU6|THS7A_MOUSE	Thsd7a	THS7A_MOUSE Thrombospondin type-1 domain-containing protein 7A	24	2491.26	2919.25	2822	3306	2508.6	2575.91	2615.9	3128.83	2946.59	10.2778	10.8322	11.3184	11.4849	11.2798	11.2697	9.90069	11.9236	11.7129
sp|Q8VCT3|AMPB_MOUSE	Rnpep	AMPB_MOUSE Aminopeptidase B	24	3268.8	3692.34	3147.43	3582.73	2868.55	2965.22	3246.43	3248	3136.51	11.7002	11.8868	10.9523	10.7983	11.1906	11.2554	10.6603	10.7389	10.8171
sp|P06801|MAOX_MOUSE	Me1	MAOX_MOUSE NADP-dependent malic enzyme	24	3994.97	4315.26	4003.09	4630.87	3526.73	3706.94	4305.06	3986.3	4003.62	11.4366	11.1109	11.141	11.1631	11.0038	11.2538	11.3064	10.5413	11.0432
sp|O35382|EXOC4_MOUSE	Exoc4	EXOC4_MOUSE Exocyst complex component 4	24	3045.96	3483.37	3129.35	3595.24	2785.49	2929.36	3355.07	3257.23	3271.54	11.0241	11.3391	11.0108	10.9569	10.9877	11.2433	11.1399	10.8895	11.4086
sp|P09103|PDIA1_MOUSE	P4hb	PDIA1_MOUSE Protein disulfide-isomerase	24	5718.93	5678.41	5389.62	6066.09	4872.09	5133.57	6040.34	6051.52	5638.36	11.7936	10.5322	10.8052	10.5336	10.9505	11.2266	11.4275	11.5275	11.2033
sp|Q8JZQ2|AFG32_MOUSE	Afg3l2	AFG32_MOUSE AFG3-like protein 2	24	5191.26	5644.76	5123.09	6078.58	4392	4722.34	5459.4	4936.35	5062.59	11.6374	11.3813	11.1651	11.4743	10.7308	11.2264	11.2277	10.2219	10.935
tr|E9Q3V9|E9Q3V9_MOUSE	Lphn1	E9Q3V9_MOUSE Latrophilin-1	24	2052.89	2296.39	2084.08	2330.38	1936.79	1921.92	2108.71	2089.39	2118.98	11.3032	11.3722	11.1557	10.8044	11.6227	11.222	10.6516	10.6267	11.2415
sp|Q9Z1J3|NFS1_MOUSE	Nfs1	NFS1_MOUSE Cysteine desulfurase, mitochondrial	24	4030.7	4449.36	3962.43	4649.92	3562.12	3695.66	4367.89	4007.21	3763.13	11.5373	11.4547	11.0264	11.2075	11.1127	11.218	11.4698	10.5951	10.3785
sp|Q9Z1Q2|ABHGA_MOUSE	Abhd16a	ABHGA_MOUSE Abhydrolase domain-containing protein 16A	24	2050.86	2286.45	2159.47	2393.98	1914.78	1988.13	2380.61	2252.21	2253.79	10.8777	10.9074	11.1351	10.692	11.0689	11.1827	11.5838	11.0344	11.518
sp|P10630|IF4A2_MOUSE	Eif4a2	IF4A2_MOUSE Eukaryotic initiation factor 4A-II	24	4303.48	4534.56	4058.76	4984.21	3487.81	3842.2	4588.19	4181.79	4145.41	11.8011	11.184	10.8203	11.509	10.4242	11.1733	11.5426	10.5926	10.9529
sp|A2AP18-2|PLCH2_MOUSE	Plch2	PLCH2_MOUSE Isoform 2 of 1-phosphatidylinositol 4,5-bisphosphate phosphodiesterase eta-2	24	2999.13	3512.41	3591.17	4033.42	2936.28	3027.21	3533.07	3420.04	3304.26	10.3274	10.8783	12.022	11.6952	11.0199	11.0545	11.1611	10.8785	10.963
sp|P28271|ACOC_MOUSE	Aco1	ACOC_MOUSE Cytoplasmic aconitate hydratase	24	2931.65	3229.58	3100.87	3457.78	2486.96	2810.76	3563.68	3194.38	3415.02	10.8723	10.7725	11.1799	10.7981	10.0523	11.0543	12.1246	10.943	12.2029
sp|P11983|TCPA_MOUSE	Tcp1	TCPA_MOUSE T-complex protein 1 subunit alpha	24	4533.44	4978.15	4748.94	5565.31	4017.23	4141.27	4614.07	4526.46	4453.46	11.3936	11.2529	11.6032	11.7778	11.0039	11.0374	10.6385	10.5083	10.7843
sp|P26231|CTNA1_MOUSE	Ctnna1	CTNA1_MOUSE Catenin alpha-1	24	3054.3	3496.71	3332.83	3770.29	2832.92	2943.03	3322.41	3515.73	3284.14	10.7992	11.1199	11.4562	11.2252	10.9169	11.035	10.7769	11.4825	11.1883
sp|Q80TL0|PPM1E_MOUSE	Ppm1e	PPM1E_MOUSE Protein phosphatase 1E	24	2832.53	3308.79	2963.34	3422.91	2578.81	2633.8	3004.78	2849.63	2869.9	11.1827	11.7491	11.3737	11.3791	11.0963	11.027	10.883	10.3921	10.917
sp|Q9R111|GUAD_MOUSE	Gda	GUAD_MOUSE Guanine deaminase	24	4801.71	5464.24	4465.08	5562.73	4233.83	4195.46	4572.6	4547.77	4373.04	11.8812	12.1606	10.7409	11.5902	11.4179	11.0089	10.3798	10.3945	10.4258
sp|Q8R4H2|ARHGC_MOUSE	Arhgef12	ARHGC_MOUSE Rho guanine nucleotide exchange factor 12	24	3059.93	3283.49	3239.95	3594.03	2760.84	2851.61	3437.13	3236.97	3280.68	11.1162	10.7286	11.4427	10.9943	10.9313	10.9859	11.4552	10.8624	11.4834
tr|A2AEW8|A2AEW8_MOUSE	Gripap1	A2AEW8_MOUSE GRIP1-associated protein 1	24	2859.45	3233.32	2779.01	3363.41	2501.28	2631.47	3283.66	2883.72	3037.78	11.2482	11.4396	10.6277	11.1409	10.7239	10.9774	11.8501	10.4784	11.5138
sp|Q9CZ30|OLA1_MOUSE	Ola1	OLA1_MOUSE Obg-like ATPase 1	24	4437.56	4781.61	4369.8	5048.45	4239.28	4093.07	4930.63	4812.57	4541.26	11.2221	10.8759	10.7433	10.7505	11.6845	10.9769	11.4392	11.2421	11.0654
sp|A2A432|CUL4B_MOUSE	Cul4b	CUL4B_MOUSE Cullin-4B	24	4197.41	4941.44	4728.08	5520.52	4160.59	4193.72	4744.2	5044.08	4998.42	10.3139	10.9208	11.2946	11.4225	11.1425	10.928	10.6946	11.4489	11.8341
sp|P09671|SODM_MOUSE	Sod2	SODM_MOUSE Superoxide dismutase [Mn], mitochondrial	24	5847.26	6259.18	4637.1	6618.04	5198.9	4964.21	5882.92	5664.1	5291.78	12.1272	11.6758	9.34974	11.5578	11.7518	10.9184	11.1934	10.8512	10.5748
sp|P49443|PPM1A_MOUSE	Ppm1a	PPM1A_MOUSE Protein phosphatase 1A	24	3163.08	3627.99	3383.81	3837.4	2859.76	2958.31	3519.97	3377.16	3310.77	11.0059	11.3538	11.4463	11.2432	10.845	10.9158	11.2361	10.8544	11.0995
sp|P55937|GOGA3_MOUSE	Golga3	GOGA3_MOUSE Golgin subfamily A member 3	24	2459.62	2660.78	2697.93	2908.41	2347.92	2317.22	2834.57	2774.86	2643.89	10.8582	10.5648	11.5789	10.8115	11.297	10.8482	11.4799	11.3155	11.2459
sp|Q6NSW3|SPKAP_MOUSE	Sphkap	SPKAP_MOUSE A-kinase anchor protein SPHKAP	24	2596.93	2787.77	2810.85	3081.41	2368.71	2418.99	2885.16	2961.83	2826.54	10.9645	10.5864	11.5376	10.9552	10.9001	10.8309	11.1754	11.5513	11.4987
sp|Q3B7Z2|OSBP1_MOUSE	Osbp	OSBP1_MOUSE Oxysterol-binding protein 1	24	3353.46	3795.81	3505.14	4004.83	3018.54	3065.07	3844.87	3592.87	3490.55	11.0686	11.2685	11.2474	11.1307	10.8588	10.7285	11.6424	10.9542	11.1008
sp|Q9ESN6|TRIM2_MOUSE	Trim2	TRIM2_MOUSE Tripartite motif-containing protein 2	24	3895.74	4511.73	4214.15	4738.35	3558	3587.76	4395.32	4201.23	4007.78	10.9746	11.4315	11.5413	11.24	10.9243	10.7182	11.3593	10.9324	10.8784
sp|Q9Z1Z0|USO1_MOUSE	Uso1	USO1_MOUSE General vesicular transport factor p115	24	3652.64	3909.58	3678.89	4276.98	3230.18	3170.16	4012.08	3612.19	3641.8	11.5023	11.0731	11.2627	11.3411	11.0864	10.5867	11.5907	10.5073	11.0498
sp|P37040|NCPR_MOUSE	Por	NCPR_MOUSE NADPH--cytochrome P450 reductase	24	4978.67	5528.75	4946.17	5643.83	4591.87	4300.24	5210.78	5020.9	4849.17	11.5333	11.5193	11.1392	11.0091	11.5935	10.5641	11.074	10.7439	10.8235
sp|Q8VDM4|PSMD2_MOUSE	Psmd2	PSMD2_MOUSE 26S proteasome non-ATPase regulatory subunit 2	24	3504.82	3845.22	3687.42	4130.27	3101.25	3078.42	3810.03	3613.42	3564.24	11.3285	11.1787	11.5871	11.2415	10.9252	10.552	11.2979	10.7886	11.1003
sp|Q9WUA2|SYFB_MOUSE	Farsb	SYFB_MOUSE Phenylalanine--tRNA ligase beta subunit	24	2769.98	2864.96	2819.59	3145.21	2304.29	2363.75	3085.31	2870.34	2736.51	11.603	10.7937	11.4822	11.0938	10.52	10.5001	11.8564	11.1062	11.0446
sp|Q8BU30|SYIC_MOUSE	Iars	SYIC_MOUSE Isoleucine--tRNA ligase, cytoplasmic	24	3222.75	3346.21	3194.56	3686.39	2962.03	2835.36	3843.08	3603.18	3404.24	11.1857	10.446	10.7794	10.774	11.205	10.4362	12.237	11.5521	11.3846
sp|Q569Z5|DDX46_MOUSE	Ddx46	DDX46_MOUSE Probable ATP-dependent RNA helicase DDX46	24	3234.17	3341.5	3641.96	3857.31	3016.55	3026.23	4177.44	4138.89	3779.09	10.493	9.75081	11.4873	10.5381	10.6668	10.4121	12.434	12.404	11.8137
sp|P62192|PRS4_MOUSE	Psmc1	PRS4_MOUSE 26S protease regulatory subunit 4	24	3641.78	4184.67	4252.5	4445.82	3573.41	3505.03	4849.75	4565.4	4411.55	10.1692	10.5098	11.5442	10.4535	10.8753	10.3792	12.4237	11.7758	11.8693
sp|D3YXK2|SAFB1_MOUSE	Safb	SAFB1_MOUSE Scaffold attachment factor B1	24	3088.22	3364.08	3541.91	3878.56	2691.8	2915.56	4067.9	3958.38	3742.51	10.3481	10.1387	11.5382	10.9437	9.83067	10.3604	12.505	12.2521	12.0831
sp|P80313|TCPH_MOUSE	Cct7	TCPH_MOUSE T-complex protein 1 subunit eta	24	3974.12	4488.85	3908.4	4787.93	3732.24	3339.1	3855.43	3898.37	3744.19	11.6212	11.8061	11.111	11.7895	11.895	10.3547	10.3429	10.5301	10.5494
sp|Q07113|MPRI_MOUSE	Igf2r	MPRI_MOUSE Cation-independent mannose-6-phosphate receptor	24	2411.49	2735.87	2867.52	3079.51	2287.02	2258.07	2801.65	3094.93	2947.42	10.3014	10.5116	11.9087	11.0773	10.648	10.2294	10.9796	12.2125	12.1315
tr|D3YWX2|D3YWX2_MOUSE	Ylpm1	D3YWX2_MOUSE YLP motif-containing protein 1	24	2437.89	2519.65	2975.64	2939.31	2233.2	2305.53	3370.26	3417.02	3157.6	10.0566	9.34845	11.9334	10.2099	10.0404	10.0858	12.7545	13.0205	12.5504
sp|Q9CY58|PAIRB_MOUSE	Serbp1	PAIRB_MOUSE Plasminogen activator inhibitor 1 RNA-binding protein	24	4546.69	4956.52	4765.93	5287.95	4382.01	4005.7	5651.9	5641.8	5211.56	10.6899	10.4813	10.8936	10.469	11.2289	9.98749	12.1908	12.2528	11.8061
sp|O89001|CBPD_MOUSE	Cpd	CBPD_MOUSE Carboxypeptidase D	24	3127.63	3315.79	3308.74	3617.62	2714.31	2583.81	3524.61	3290.71	3274.4	11.3735	10.8449	11.6973	11.0774	10.7578	9.9641	11.7584	11.0537	11.4728
sp|P97379|G3BP2_MOUSE	G3bp2	G3BP2_MOUSE Ras GTPase-activating protein-binding protein 2	24	3373.72	3593.25	3524.02	4021.76	3103.91	2788.44	3841.31	3642.67	3413.61	11.2698	10.7958	11.4443	11.3126	11.3006	9.87796	11.7719	11.24	10.9871
sp|Q80X90|FLNB_MOUSE	Flnb	FLNB_MOUSE Filamin-B	23	2443.58	3455.76	2728.84	2761.81	2281.95	2839.79	2861.01	3191.92	3232.69	9.88631	12.5751	10.7333	9.40895	10.0624	12.1841	10.6191	11.9289	12.6018
sp|Q80TS3|LPHN3_MOUSE	Lphn3	LPHN3_MOUSE Latrophilin-3	23	2787.73	3225.71	2876.51	3187.68	2333.15	2759.7	2721.33	2835.4	2730.01	11.432	11.8976	11.4679	11.0074	10.428	12.0015	10.238	10.7406	10.7869
sp|P01831|THY1_MOUSE	Thy1	THY1_MOUSE Thy-1 membrane glycoprotein	23	2709.16	2862.05	2652.08	3111.07	2270.64	2640.35	2853.98	2680.28	2637.07	11.582	11.0049	11.0226	11.1995	10.58	11.9705	11.1934	10.5845	10.8626
sp|P51174|ACADL_MOUSE	Acadl	ACADL_MOUSE Long-chain specific acyl-CoA dehydrogenase, mitochondrial	23	3664.21	4240.4	3579.19	4303.14	3413.54	3659.97	3737.02	3876.51	3539.18	11.2392	11.6983	10.673	11.1142	11.4116	11.9051	10.5157	10.9834	10.4597
sp|Q61137|ASTN1_MOUSE	Astn1	ASTN1_MOUSE Astrotactin-1	23	2933.3	3317.64	2968.46	3569.04	2667.61	2850.68	3000.13	2840.12	2866.79	11.3356	11.5313	11.1523	11.6139	11.2356	11.6825	10.6362	10.1383	10.6744
sp|P30416|FKBP4_MOUSE	Fkbp4	FKBP4_MOUSE Peptidyl-prolyl cis-trans isomerase FKBP4	23	3919.33	4302.45	3903.95	4782.04	3341.95	3738.21	3865	3795.98	3901.48	11.5176	11.3717	11.1532	11.8332	10.7038	11.6497	10.4198	10.3042	11.0469
sp|P15924|DESP_HUMAN_contaminant	DSP	DESP_HUMAN_contaminant Desmoplakin	23	2240.32	2520.37	2045.64	3128.02	3139.7	2608.4	2809.36	2989.9	3252.03	9.41685	9.52843	8.35933	11.0715	14.3837	11.6271	10.8334	11.609	13.1708
sp|Q922S4|PDE2A_MOUSE	Pde2a	PDE2A_MOUSE cGMP-dependent 3',5'-cyclic phosphodiesterase	23	4196.08	5112.89	4424.24	5411.44	3824.79	4161.95	4191.17	4342.68	4214.8	10.9982	12.0533	11.2736	11.9435	10.9263	11.5685	10.078	10.5142	10.6443
sp|Q9CQZ5|NDUA6_MOUSE	Ndufa6	NDUA6_MOUSE NADH dehydrogenase [ubiquinone] 1 alpha subcomplex subunit 6	23	2961.09	3002.1	2749.15	3336.38	2561.81	2713.88	3079.19	2801.23	2848.14	11.8585	10.8135	10.7035	11.2511	11.1819	11.5258	11.313	10.3626	10.9901
sp|Q14BI2|GRM2_MOUSE	Grm2	GRM2_MOUSE Metabotropic glutamate receptor 2	23	3222.85	3884.26	3234.36	3797.11	2900.26	3149.33	3257.58	3442.14	3470.58	11.0861	12.0174	10.8162	10.9985	10.8734	11.4884	10.2801	10.9373	11.5028
sp|O55234|PSB5_MOUSE	Psmb5	PSB5_MOUSE Proteasome subunit beta type-5	23	4193.65	4581.61	3867.85	4815.79	3573.79	3850.65	4304.19	4135.61	4030.83	11.7269	11.5231	10.5149	11.3396	10.892	11.4189	11.0419	10.6824	10.8604
sp|Q8BH57|WDR48_MOUSE	Wdr48	WDR48_MOUSE WD repeat-containing protein 48	23	3440.1	3892.22	3732.95	4124.51	3169.48	3415.74	3809.19	3976.62	3592.18	10.8354	11.0264	11.4307	10.9392	10.8805	11.4093	11.007	11.5699	10.9017
sp|P63005|LIS1_MOUSE	Pafah1b1	LIS1_MOUSE Platelet-activating factor acetylhydrolase IB subunit alpha	23	4517.62	5120.5	4269.68	5247.58	4032.35	4025.59	3980.61	4137.69	3899.51	12.0189	12.2526	11.0432	11.7558	11.6923	11.3575	9.71548	10.1684	9.99597
sp|P80317|TCPZ_MOUSE	Cct6a	TCPZ_MOUSE T-complex protein 1 subunit zeta	23	4129.17	4362.08	4159.27	4789.2	3775.59	3911.18	4458.54	4454.01	4186.48	11.2727	10.7107	11.039	11.0095	11.2341	11.3233	11.1665	11.232	11.0122
sp|Q9ERS2|NDUAD_MOUSE	Ndufa13	NDUAD_MOUSE NADH dehydrogenase [ubiquinone] 1 alpha subcomplex subunit 13	23	2761.32	2995.41	2747.15	3255.77	2549.25	2545.9	2828.03	2685.72	2600.92	11.5404	11.2596	11.1618	11.4577	11.6119	11.2836	10.843	10.3683	10.4736
sp|Q02357-6|ANK1_MOUSE	Ank1	ANK1_MOUSE Isoform 6 of Ankyrin-1	23	2533.21	2797.55	2738.6	3000.03	2367.2	2513.39	2894.43	2942.9	2910.11	10.7062	10.6342	11.2523	10.6765	10.904	11.2648	11.2225	11.489	11.8505
sp|Q8CH77|NAV1_MOUSE	Nav1	NAV1_MOUSE Neuron navigator 1	23	2807.28	3212.82	3283.8	3463.46	2586.97	2811.37	3366.59	3229.71	2998.18	10.5666	10.8767	12.0164	10.9774	10.6128	11.222	11.6252	11.2294	10.8735
sp|Q9Z0U1|ZO2_MOUSE	Tjp2	ZO2_MOUSE Tight junction protein ZO-2	23	3420.34	3700.17	3596.82	3999.53	2947.06	3327.86	4046.64	4068.86	3847.28	10.8473	10.5544	11.0896	10.6807	10.1865	11.1922	11.7735	11.9197	11.7562
sp|B1AY13|UBP24_MOUSE	Usp24	UBP24_MOUSE Ubiquitin carboxyl-terminal hydrolase 24	23	3073.9	3434.17	3345.96	3674.65	2865.83	2958.19	3352.82	3426.88	3230.72	10.9296	10.9824	11.5659	11.0019	11.1058	11.1542	10.9367	11.2552	11.0681
sp|O35954|PITM1_MOUSE	Pitpnm1	PITM1_MOUSE Membrane-associated phosphatidylinositol transfer protein 1	23	2037.48	2287.72	2235.77	2482.72	1856.9	1929.72	2173.33	2145.23	2049.33	11.0856	11.1952	11.8261	11.3745	11.0114	11.1343	10.8481	10.7816	10.7434
sp|Q9EPJ9|ARFG1_MOUSE	Arfgap1	ARFG1_MOUSE ADP-ribosylation factor GTPase-activating protein 1	23	3251.27	3524.38	3179.05	3800.96	2949.44	2937.59	3378.57	3154.53	3073.12	11.6048	11.3143	11.0313	11.424	11.4739	11.1192	11.0631	10.4006	10.5688
sp|Q9CR16|PPID_MOUSE	Ppid	PPID_MOUSE Peptidyl-prolyl cis-trans isomerase D	23	3138.67	3472.79	3154.35	3688.54	2754	2862.87	3304.87	3160.3	3039.27	11.4752	11.4197	11.2117	11.3555	10.974	11.0998	11.0848	10.6729	10.7064
sp|Q91Z67|SRGP2_MOUSE	Srgap2	SRGP2_MOUSE SLIT-ROBO Rho GTPase-activating protein 2	23	3350.47	3800.7	3864.28	4133.1	3185	3291.13	3904.06	3622.63	3700.81	10.6495	10.8655	11.941	11.0622	11.0337	11.0936	11.3842	10.6363	11.334
sp|Q8BMS1|ECHA_MOUSE	Hadha	ECHA_MOUSE Trifunctional enzyme subunit alpha, mitochondrial	23	3888.28	4403.6	3902.55	4644.67	3570.25	3592.84	4130.79	4112.74	3867.65	11.2474	11.4568	10.9746	11.3133	11.2559	11.0213	10.962	10.9892	10.7796
tr|F8VPZ3|F8VPZ3_MOUSE	Usp32	F8VPZ3_MOUSE Ubiquitin carboxyl-terminal hydrolase	23	2904.3	3171.41	3033.43	3364.23	2785.65	2694.15	3159.37	3004.49	2945.46	11.1947	10.9947	11.3671	10.9193	11.7027	11.0127	11.172	10.6975	10.9392
sp|O35250|EXOC7_MOUSE	Exoc7	EXOC7_MOUSE Exocyst complex component 7	23	4068.04	4474.14	4093.14	4702.29	3828.68	3754.67	4437.98	4501.42	4144.86	11.1732	11.0526	10.9294	10.8753	11.4612	10.9362	11.1825	11.4205	10.969
sp|Q80UJ7|RB3GP_MOUSE	Rab3gap1	RB3GP_MOUSE Rab3 GTPase-activating protein catalytic subunit	23	4453.86	4986.2	4765.16	5309.12	4119.91	4143.19	4936.79	4811.87	4534.98	11.0602	11.1367	11.5041	11.1017	11.1507	10.911	11.2469	11.0378	10.8509
sp|Q9ES28|ARHG7_MOUSE	Arhgef7	ARHG7_MOUSE Rho guanine nucleotide exchange factor 7	23	3005.36	3341.94	3044.47	3443.85	2639.33	2673.11	3191.03	3017.6	2811.59	11.5564	11.558	11.3811	11.1509	11.0613	10.9004	11.2568	10.7183	10.4169
sp|Q93092|TALDO_MOUSE	Taldo1	TALDO_MOUSE Transaldolase	23	5038.13	5486.69	4423.06	5708.42	4144.26	4269.85	4934.58	4836.25	4646.04	12.1122	11.8638	10.3377	11.556	10.8589	10.8859	10.8834	10.74	10.7621
sp|Q8CI71|CC132_MOUSE	Ccdc132	CC132_MOUSE Coiled-coil domain-containing protein 132	23	3622.54	4044.62	3850.6	4414.17	3366.72	3316.18	3737.26	3770.11	3703.15	11.1855	11.2326	11.5589	11.477	11.3301	10.8588	10.5866	10.7532	11.0173
tr|Q3UE92|Q3UE92_MOUSE	Xpnpep1	Q3UE92_MOUSE X-prolyl aminopeptidase (Aminopeptidase P) 1, soluble, isoform CRA_b	23	3688.26	4018.95	3777.16	4331.08	3249.4	3261.65	3750.16	3746.42	3576.74	11.5367	11.3066	11.4861	11.4076	11.0777	10.8193	10.7615	10.8247	10.7798
sp|Q9WUC3|LY6H_MOUSE	Ly6h	LY6H_MOUSE Lymphocyte antigen 6H	23	2284.48	3186.12	3399.47	3872.36	2785.6	2722.21	2649.25	3628.87	3439.69	8.5448	10.7186	12.3615	12.1963	11.3559	10.7978	9.09072	12.538	12.3964
sp|Q80XK6|ATG2B_MOUSE	Atg2b	ATG2B_MOUSE Autophagy-related protein 2 homolog B	23	2625.04	2981.6	2784.73	3190.15	2505.41	2464.04	2995.55	2975.34	2811.98	10.825	11.0586	11.164	11.0775	11.2605	10.7755	11.3326	11.3336	11.1729
sp|Q9QUR6|PPCE_MOUSE	Prep	PPCE_MOUSE Prolyl endopeptidase	23	5074.33	5555.64	5031.5	5761.53	4540.4	4406.74	5200.75	5141.91	4827.45	11.6362	11.4585	11.217	11.1252	11.3478	10.7164	10.941	10.8917	10.6662
sp|P01027|CO3_MOUSE	C3	CO3_MOUSE Complement C3	23	2966.64	2934.29	2232.46	2766.21	2266.58	2412.13	2915.9	3270.51	3203.79	12.404	11.0347	9.07459	9.73916	10.3289	10.6954	11.1849	12.6314	12.9069
sp|Q61037-6|TSC2_MOUSE	Tsc2	TSC2_MOUSE Isoform E of Tuberin	23	2782.79	3171.25	3045.02	3414.69	2571.17	2589.48	3213.94	3142.26	2967	10.8158	11.0859	11.5057	11.1755	10.8917	10.6731	11.4598	11.2813	11.1111
sp|Q9R0P9|UCHL1_MOUSE	Uchl1	UCHL1_MOUSE Ubiquitin carboxyl-terminal hydrolase isozyme L1	23	3767.71	4154.74	3281.02	4272.42	3269.32	3127.17	3723.65	3616.15	3353.34	12.0919	11.9929	10.237	11.546	11.4357	10.6432	10.9635	10.7203	10.3695
sp|Q61191|HCFC1_MOUSE	Hcfc1	HCFC1_MOUSE Host cell factor 1	23	3446.72	3666.48	3706.07	4033.18	3096.7	3134.4	4011.96	4009.2	3711.02	10.976	10.5015	11.4736	10.815	10.748	10.5851	11.7208	11.7934	11.3866
sp|A2ALU4|SHRM2_MOUSE	Shroom2	SHRM2_MOUSE Protein Shroom2	23	2947.97	3242.26	2804.9	3308.6	2677.68	2511.34	3056.71	3028.52	2839.87	11.6536	11.5278	10.7796	11.0134	11.5367	10.5279	11.0854	11.0588	10.8168
sp|Q99K48|NONO_MOUSE	Nono	NONO_MOUSE Non-POU domain-containing octamer-binding protein	23	4180.9	4379.45	4114.6	4931.71	3867.2	3741.3	4839.08	4954.27	4484.22	11.0631	10.4228	10.5847	10.9886	11.1529	10.4985	11.7471	12.1095	11.4328
sp|A2A5R2|BIG2_MOUSE	Arfgef2	BIG2_MOUSE Brefeldin A-inhibited guanine nucleotide-exchange protein 2	23	3018.33	3528.03	3296.9	3730.56	3043.57	2810.81	3500.91	3550.89	3343.78	10.5722	11.1146	11.2267	11.0031	11.619	10.4408	11.2497	11.4889	11.2849
sp|P54823|DDX6_MOUSE	Ddx6	DDX6_MOUSE Probable ATP-dependent RNA helicase DDX6	23	2362.6	2647.84	2534.64	2886.52	2331.79	2126.99	2625.08	2694.15	2514.33	10.8598	10.9468	11.3265	11.1724	11.6818	10.3681	11.0697	11.4392	11.1357
sp|O88685|PRS6A_MOUSE	Psmc3	PRS6A_MOUSE 26S protease regulatory subunit 6A	23	4175.16	4613.63	3799.09	4611.56	3637	3333.98	4085.95	3804.55	3651.82	12.2144	12.1395	10.805	11.3602	11.5966	10.3434	10.9661	10.2812	10.2937
sp|Q8BYR5|CAPS2_MOUSE	Cadps2	CAPS2_MOUSE Calcium-dependent secretion activator 2	23	3069.27	3560.74	3348.62	3655.3	2905.15	2700.29	3246.75	3257.58	3189.98	11.0818	11.5632	11.7541	11.1132	11.4322	10.3392	10.7544	10.8645	11.0975
sp|O08808|DIAP1_MOUSE	Diaph1	DIAP1_MOUSE Protein diaphanous homolog 1	23	3049.22	3353.54	3441.79	3657.34	2870.5	2764.19	3647.43	3538.26	3326.97	10.7476	10.6313	11.7938	10.8549	11.0272	10.3321	11.7942	11.52	11.2988
sp|Q05816|FABP5_MOUSE	Fabp5	FABP5_MOUSE Fatty acid-binding protein, epidermal	22	1815.7	2220.49	1942.67	2391.16	1662.53	1982.59	1674.49	1878.53	1962.69	10.8129	11.8935	11.2472	11.9908	10.7908	12.5208	9.14835	10.3337	11.2619
sp|Q80XN0|BDH_MOUSE	Bdh1	BDH_MOUSE D-beta-hydroxybutyrate dehydrogenase, mitochondrial	22	3582.79	4054.8	3842.34	4495.54	3501.72	3817.7	3910.1	4034.32	3769.05	10.6754	10.8666	11.1303	11.2794	11.3719	12.0633	10.6884	11.1039	10.8208
tr|F8VQK3|F8VQK3_MOUSE	Gucy1a2	F8VQK3_MOUSE Protein Gucy1a2	22	2446.29	2794.61	2530.42	2887.1	2175.98	2455.11	2544.57	2620.96	2566.16	11.0922	11.3971	11.1545	11.0233	10.7536	11.8054	10.5849	10.9777	11.2113
sp|Q9QUP5|HPLN1_MOUSE	Hapln1	HPLN1_MOUSE Hyaluronan and proteoglycan link protein 1	22	3235.88	3687.49	3121.43	3943.21	3054.34	3164.35	3269.2	3145.35	3133.96	11.3475	11.6305	10.6416	11.6438	11.6738	11.7677	10.5174	10.1886	10.5892
sp|A2AJA9|CI172_MOUSE	Gm996	CI172_MOUSE Uncharacterized protein C9orf172 homolog	22	2850.24	3067.94	3045.51	3452.78	2330.16	2824.34	3168.04	2937.95	2967.6	11.1808	10.8243	11.6145	11.4052	9.96245	11.7493	11.4011	10.6458	11.2166
sp|P14231|AT1B2_MOUSE	Atp1b2	AT1B2_MOUSE Sodium/potassium-transporting ATPase subunit beta-2	22	2839.2	3114.27	2646.09	3380.23	2529.03	2687.82	2709.95	2821.95	2756.61	11.6291	11.4727	10.5366	11.6583	11.2899	11.6748	10.1829	10.6768	10.8789
sp|Q68FF6|GIT1_MOUSE	Git1	GIT1_MOUSE ARF GTPase-activating protein GIT1	22	3446.25	3996.06	3795.93	4233.45	3137.44	3426.36	3592.15	3593.82	3571.74	10.9735	11.4444	11.7507	11.351	10.8883	11.57	10.4934	10.5705	10.9582
sp|Q9JLZ3|AUHM_MOUSE	Auh	AUHM_MOUSE Methylglutaconyl-CoA hydratase, mitochondrial	22	3776.19	4112.75	3572.01	4472.9	3249.35	3514.32	3851.49	3778.36	3643.4	11.6131	11.3759	10.6796	11.583	10.8912	11.4613	10.8664	10.7334	10.796
sp|Q9CPW4|ARPC5_MOUSE	Arpc5	ARPC5_MOUSE Actin-related protein 2/3 complex subunit 5	22	3049.15	3781.41	2916.57	3424.92	3104.93	3093.12	3884.42	3224.35	3443.02	10.6267	11.8532	9.88186	10.051	11.7939	11.4319	12.4196	10.3801	11.5617
sp|Q60790|RASA3_MOUSE	Rasa3	RASA3_MOUSE Ras GTPase-activating protein 3	22	2688.1	3144.4	2911.53	3383.75	2618.32	2750.34	2947.4	3191.22	3019.39	10.5302	11.0788	11.0882	11.1617	11.179	11.4256	10.5924	11.5476	11.3966
sp|O35526|STX1A_MOUSE	Stx1a	STX1A_MOUSE Syntaxin-1A	22	2146.03	2483.88	2324.78	2616.01	2012.78	2103.95	2375.5	2249.55	2138.66	10.9571	11.4064	11.5395	11.247	11.2006	11.3918	11.1269	10.6095	10.5211
sp|Q3UHB1|NT5D3_MOUSE	Nt5dc3	NT5D3_MOUSE 5'-nucleotidase domain-containing protein 3	22	3892.28	4131	3759.69	4647.3	3415.55	3590.23	4100.31	3885.01	3633.65	11.5988	11.072	10.892	11.6614	11.0932	11.3457	11.2096	10.6941	10.4331
sp|P26040|EZRI_MOUSE	Ezr	EZRI_MOUSE Ezrin	22	3629.1	3967.11	3615.03	4236.6	3253.99	3518.77	4119.76	4000.95	4135.16	10.9917	10.8069	10.6445	10.8049	10.7416	11.302	11.4472	11.1936	12.0676
sp|Q64737|PUR2_MOUSE	Gart	PUR2_MOUSE Trifunctional purine biosynthetic protein adenosine-3	22	3685.33	4056.05	3559	4119.28	3122.19	3339.58	3698.7	3643.76	3643.35	11.7084	11.5901	10.9925	11.02	10.811	11.2516	10.7803	10.6933	11.1528
sp|Q8BKC5|IPO5_MOUSE	Ipo5	IPO5_MOUSE Importin-5	22	3128.27	3633.25	3263.88	3867.44	2990.35	2996.17	3140.14	3318.28	3277.72	11.0281	11.52	11.186	11.4805	11.4896	11.2012	10.1556	10.8056	11.1334
sp|Q9Z1T6|FYV1_MOUSE	Pikfyve	FYV1_MOUSE 1-phosphatidylinositol 3-phosphate 5-kinase	22	2177.15	2469.57	2465.35	2622.36	2169.94	2136.32	2252.56	2468.4	2348.97	10.7547	10.9722	11.8396	10.9079	11.6827	11.1912	10.2082	11.2633	11.1802
sp|O09111|NDUBB_MOUSE	Ndufb11	NDUBB_MOUSE NADH dehydrogenase [ubiquinone] 1 beta subcomplex subunit 11, mitochondrial	22	1944.16	2047.35	1944.6	2238.42	1724.52	1809.96	2226.61	2030.88	1992.15	11.3045	10.7071	10.9925	10.9598	10.9289	11.1606	11.8775	10.908	11.161
sp|Q8BGD9|IF4B_MOUSE	Eif4b	IF4B_MOUSE Eukaryotic translation initiation factor 4B	22	3874.23	4441.1	3970.16	4939.26	3427.11	3905.9	4869.59	4916.14	4663.16	10.3961	10.7185	10.3571	11.1605	10.023	11.1149	11.9877	12.1856	12.0566
tr|D3YXZ3|D3YXZ3_MOUSE	Klc2	D3YXZ3_MOUSE Kinesin light chain 2	22	3913.54	4342.82	4033.7	4656.43	3568.1	3573.71	4047.92	4022.71	3720.24	11.3916	11.3697	11.4147	11.4132	11.3198	11.0315	10.8095	10.8162	10.4339
tr|E9Q9B7|E9Q9B7_MOUSE	Kidins220	E9Q9B7_MOUSE Protein Kidins220	22	1956.09	2283.83	2183.66	2480.12	1899.9	1966.09	2341.12	2360.75	2286.35	10.345	10.8634	11.2272	11.0447	10.9511	11.0267	11.3586	11.5327	11.6505
sp|B2RXS4|PLXB2_MOUSE	Plxnb2	PLXB2_MOUSE Plexin-B2	22	2852.99	3380.38	3028.97	3603.23	2712.88	2741.96	2924.62	3263.52	3057.95	10.8147	11.525	11.1623	11.5012	11.208	11.0223	10.1705	11.4272	11.1687
sp|Q9CZC8|SCRN1_MOUSE	Scrn1	SCRN1_MOUSE Secernin-1	22	3023.24	3674.93	3030.56	3570.56	2953.31	2876.61	3210.31	3439.02	3161.64	10.9068	11.9243	10.629	10.8467	11.6123	11.0054	10.6251	11.4604	10.99
sp|Q64433|CH10_MOUSE	Hspe1	CH10_MOUSE 10 kDa heat shock protein, mitochondrial	22	5604.68	6118.37	4829.27	6312.51	5002.34	4786.69	5600.16	5095.49	5086.1	12.0813	11.8621	10.1203	11.4579	11.7523	10.9421	11.0745	10.1459	10.5636
sp|Q9ESN9|JIP3_MOUSE	Mapk8ip3	JIP3_MOUSE C-Jun-amino-terminal kinase-interacting protein 3	22	3029.76	3481.36	3252.95	3672.53	2843.02	2855.51	3293.28	3238.1	3270.66	10.9352	11.3013	11.4142	11.1616	11.1837	10.9296	10.9046	10.7957	11.3741
sp|Q0P5W1|VPS8_MOUSE	Vps8	VPS8_MOUSE Vacuolar protein sorting-associated protein 8 homolog	22	3524.1	4036.68	3744.21	4130.76	3308.58	3223.43	3525.38	3746.83	3472.77	11.2452	11.5852	11.6151	11.0991	11.5066	10.9078	10.3201	11.0439	10.6771
sp|Q3URD3|SLMAP_MOUSE	Slmap	SLMAP_MOUSE Sarcolemmal membrane-associated protein	22	3099.15	3327.01	3093.46	3524.14	2924.79	2803.36	3340.25	3250.11	3102.41	11.3593	10.9679	11.023	10.8768	11.684	10.8966	11.2318	11.004	10.9565
sp|Q9ER72|SYCC_MOUSE	Cars	SYCC_MOUSE Cysteine--tRNA ligase, cytoplasmic	22	2476.46	2686.49	2653.77	3032.94	2290.85	2312.67	2844.16	2696.08	2537.11	10.9966	10.7294	11.4562	11.3405	11.087	10.8904	11.5863	11.0587	10.855
sp|Q9QYS2|GRM3_MOUSE	Grm3	GRM3_MOUSE Metabotropic glutamate receptor 3	22	3097.45	3662.93	3181.42	3606.39	2883.16	2755.45	2864.59	3085.26	2880.23	11.5408	12.275	11.5239	11.3147	11.7081	10.8874	9.79163	10.6185	10.34
sp|P56399|UBP5_MOUSE	Usp5	UBP5_MOUSE Ubiquitin carboxyl-terminal hydrolase 5	22	2823.48	3212.7	2840.11	3329.53	2373.98	2557.09	3242.46	2718.77	3043.9	11.2958	11.5602	11.0462	11.2164	10.3513	10.8487	11.9006	10.0472	11.7334
sp|Q8BJ42|DLGP2_MOUSE	Dlgap2	DLGP2_MOUSE Disks large-associated protein 2	22	3921.66	4350.44	4001.68	4652.72	3489	3556.52	4277.46	4151.13	4000.26	11.2594	11.2342	11.1696	11.2485	10.9178	10.8286	11.2666	11.0092	11.0662
sp|Q3TPX4|EXOC5_MOUSE	Exoc5	EXOC5_MOUSE Exocyst complex component 5	22	3644.05	4515.56	4070.17	4848.73	3613	3457.24	3622.99	4029.18	3787.03	10.704	11.9298	11.6231	11.993	11.5669	10.7694	9.76314	10.9325	10.7182
sp|Q9DBE8|ALG2_MOUSE	Alg2	ALG2_MOUSE Alpha-1,3/1,6-mannosyltransferase ALG2	22	3238.37	3429.29	3072.04	3653.13	2849.93	2856.91	3725.49	3416.22	3153.31	11.5109	10.9635	10.6159	10.9343	11.0409	10.7692	12.1487	11.2169	10.7997
tr|B8QI36|B8QI36_MOUSE	Ppfia4	B8QI36_MOUSE Liprin-alpha 4	22	3463.59	3886.35	3884.22	4307.06	3219.41	3384.63	4671.19	4219.34	4050.3	10.325	10.42	11.2568	10.8115	10.4599	10.6998	12.7748	11.6185	11.6336
sp|O08917|FLOT1_MOUSE	Flot1	FLOT1_MOUSE Flotillin-1	22	2472.8	2689.79	2552.04	2888.52	2287.29	2158.16	2610.27	2446.2	2297.01	11.5258	11.2762	11.5642	11.337	11.6196	10.6676	11.1617	10.5321	10.3159
tr|E9QKT1|E9QKT1_MOUSE	Ube3a	E9QKT1_MOUSE Ubiquitin-protein ligase E3A	22	2344.9	2557.52	2391.72	2774.83	2190.94	2107.67	2665.43	2610.88	2324.62	11.152	10.9397	11.0582	11.1123	11.3565	10.6299	11.6294	11.4698	10.6522
sp|Q8BJ71|NUP93_MOUSE	Nup93	NUP93_MOUSE Nuclear pore complex protein Nup93	22	3540.83	3857.21	3742.21	4117.3	3377.8	3251.79	3973.07	4238.02	3818.07	10.9004	10.68	11.1998	10.6731	11.3333	10.616	11.2208	12.0515	11.3251
sp|Q9D6Z1|NOP56_MOUSE	Nop56	NOP56_MOUSE Nucleolar protein 56	22	2985.41	3305.58	3432.26	3818.22	2878.15	3021.11	4174.44	4336.1	3987.63	9.77916	9.73881	10.9301	10.5317	10.2754	10.4946	12.5446	13.1201	12.5856
sp|Q5PR69|K1211_MOUSE	Kiaa1211	K1211_MOUSE Uncharacterized protein KIAA1211	22	1385.68	1594.54	1688.44	1836.01	1446.24	1344.42	1754.61	1754.01	1636.54	10.0295	10.3804	11.8809	11.19	11.4089	10.3193	11.6509	11.7271	11.4131
sp|Q9WTU3|SCN8A_MOUSE	Scn8a	SCN8A_MOUSE Sodium channel protein type 8 subunit alpha	22	2108.53	2290.69	2266.31	2413.86	2002.03	1867.4	2518.81	2379.39	2218.85	10.9742	10.7231	11.4672	10.579	11.3566	10.3069	12.0267	11.4393	11.1271
sp|P17879|HS71B_MOUSE	Hspa1b	HS71B_MOUSE Heat shock 70 kDa protein 1B	22	3293.83	3761.73	3564.4	4067.61	3072.11	2803.1	3641.42	3271.08	3143.58	11.2496	11.5554	11.835	11.698	11.4356	10.1525	11.4095	10.3197	10.3448
sp|Q8BGZ1|HPCL4_MOUSE	Hpcal4	HPCL4_MOUSE Hippocalcin-like protein 4	22	1163.24	1297.62	1278.49	1450.6	1096.33	1044.93	1393.42	1432.69	1279.02	10.6408	10.6761	11.3697	11.1736	10.9304	10.1366	11.6936	12.106	11.2731
sp|Q8BI84|MIA3_MOUSE	Mia3	MIA3_MOUSE Melanoma inhibitory activity protein 3	22	2742.3	2926.14	2980.66	3151.57	2709.17	2426.03	3314.08	3423.95	3190.2	10.6588	10.2294	11.2629	10.3148	11.4767	9.99975	11.8173	12.2931	11.9474
sp|Q99JF8|PSIP1_MOUSE	Psip1	PSIP1_MOUSE PC4 and SFRS1-interacting protein	22	3736.25	3994.72	4036.44	4573.98	3373.19	3279.23	4966.47	4731.36	4651.9	10.4751	10.0733	11.0019	10.7984	10.3075	9.74981	12.7742	12.2532	12.5666
sp|P49312|ROA1_MOUSE	Hnrnpa1	ROA1_MOUSE Heterogeneous nuclear ribonucleoprotein A1	21	1862.25	1897.76	2053.99	2434.69	1444.29	2102.15	1944.49	1902.01	2096.93	10.9668	10.0518	11.7595	12.0733	9.27009	13.1282	10.5053	10.3466	11.8984
sp|Q8BWT1|THIM_MOUSE	Acaa2	THIM_MOUSE 3-ketoacyl-CoA thiolase, mitochondrial	21	3414.48	3673.8	3242.67	4022.07	2894.55	3587.68	3366.62	3244.13	3369.77	11.5551	11.1822	10.6684	11.4614	10.6762	12.8755	10.4521	10.1412	10.9878
sp|O35129|PHB2_MOUSE	Phb2	PHB2_MOUSE Prohibitin-2	21	3003.27	3154.94	2876.93	3376.03	2576.91	3116.05	3153.29	3173.74	2976.77	11.4252	10.795	10.6401	10.8147	10.6846	12.5712	11.0051	11.1528	10.9113
sp|Q99MR8|MCCA_MOUSE	Mccc1	MCCA_MOUSE Methylcrotonoyl-CoA carboxylase subunit alpha, mitochondrial	21	2870.8	3204.67	2967.29	3431.99	2602.7	3013.57	3008.05	2970.64	3027.53	11.0496	11.094	11.1033	11.1232	10.9183	12.3006	10.6216	10.5617	11.2278
sp|Q8BKX6|SMG1_MOUSE	Smg1	SMG1_MOUSE Serine/threonine-protein kinase SMG1	21	2224.15	1904.53	2385.25	2104.81	2074.65	2171.5	2148.63	2584.49	1958.04	11.807	9.0934	12.31	9.4087	12.0035	12.2247	10.4641	12.6734	10.0152
sp|P0C7L0|WIPF3_MOUSE	Wipf3	WIPF3_MOUSE WAS/WASL-interacting protein family member 3	21	2244.9	2505.84	2389.97	2672.61	2030.13	2444.7	2769.66	2647.82	2600.55	10.5048	10.5464	10.8725	10.5309	10.3538	12.1315	11.8899	11.4451	11.7251
sp|Q9WTQ5|AKA12_MOUSE	Akap12	AKA12_MOUSE A-kinase anchor protein 12	21	2790.16	3930.84	3129.46	3328.66	3108.88	3048.88	2712.68	3249.03	2933.06	10.2926	13.0419	11.2231	10.3396	12.4993	11.9271	9.18026	11.0711	10.425
sp|Q80VP0|TCPR1_MOUSE	Tecpr1	TCPR1_MOUSE Tectonin beta-propeller repeat-containing protein 1	21	2133.46	2408.51	2373.95	2655.68	1860.17	2163.97	2263.39	2137.67	2247.23	11.0072	11.1764	11.9072	11.5374	10.46	11.8398	10.7131	10.1877	11.1713
sp|Q9ESJ4|SPN90_MOUSE	Nckipsd	SPN90_MOUSE NCK-interacting protein with SH3 domain	21	3186.14	3430.38	3188.51	3685.41	3179.51	3192.83	3489.19	3432.61	3204.73	11.0686	10.7184	10.7686	10.7808	12.0385	11.7626	11.1202	11.0152	10.727
sp|Q99LC5|ETFA_MOUSE	Etfa	ETFA_MOUSE Electron transfer flavoprotein subunit alpha, mitochondrial	21	4117.02	4648.46	3611.91	4724.44	3663.16	3839.17	3808.38	3969.55	3748.14	11.8909	12.0754	10.1418	11.49	11.5312	11.7589	10.0909	10.5904	10.4306
sp|P50544|ACADV_MOUSE	Acadvl	ACADV_MOUSE Very long-chain specific acyl-CoA dehydrogenase, mitochondrial	21	2024.61	2257.46	2031.51	2427.01	1809.49	1965.62	1976.85	2089.01	1925.49	11.4199	11.4525	11.14	11.5274	11.1241	11.7576	10.2295	10.8843	10.4646
sp|Q9QYB5|ADDG_MOUSE	Add3	ADDG_MOUSE Gamma-adducin	21	2662.19	2956.69	2944.22	3453.67	2708.49	2821.84	3018.93	3128.92	3115.22	10.3596	10.3483	11.1383	11.3168	11.4873	11.6449	10.7775	11.247	11.6803
sp|Q8K394|PLCL2_MOUSE	Plcl2	PLCL2_MOUSE Inactive phospholipase C-like protein 2	21	2873.12	3201.31	3115.73	3457.08	2605.52	2919.78	3277.35	3286.88	3097.14	10.7787	10.8019	11.3636	10.9209	10.6535	11.6161	11.2796	11.3903	11.1952
sp|P21619|LMNB2_MOUSE	Lmnb2	LMNB2_MOUSE Lamin-B2	21	2407.86	2601.9	2753.93	3017	1722.58	2394.24	2950.29	2528.93	2656.89	10.9523	10.6445	12.178	11.5555	8.53968	11.549	12.3112	10.6256	11.6442
tr|A2AE27|A2AE27_MOUSE	Ampd2	A2AE27_MOUSE AMP deaminase 2	21	3038.77	3345.89	3187.03	3511.8	2695.9	3010.83	3470.71	3444.19	3373.33	10.911	10.8053	11.125	10.6178	10.5501	11.4644	11.4326	11.4234	11.6704
sp|Q9D394|RUFY3_MOUSE	Rufy3	RUFY3_MOUSE Protein RUFY3	21	3000.43	3212.94	2890.48	3422.08	2601.02	2797.02	3265	2983.69	2935.92	11.5565	11.1303	10.8233	11.0987	10.9188	11.4245	11.5369	10.6154	10.8955
sp|Q9ESW4|AGK_MOUSE	Agk	AGK_MOUSE Acylglycerol kinase, mitochondrial	21	2540.91	2893.41	2764.78	3048.04	2374	2486.15	2660.93	2702.52	2614.89	11.0098	11.2761	11.6465	11.1211	11.2113	11.4239	10.5775	10.8168	10.917
sp|Q99LX0|PARK7_MOUSE	Park7	PARK7_MOUSE Protein DJ-1	21	3083.67	3310.58	2604.57	3302.41	2612.64	2608.14	2717.15	2529.44	2490.74	12.7337	12.2956	10.4561	11.483	11.7585	11.4213	10.2934	9.6483	9.91005
sp|Q8C0M9|ASGL1_MOUSE	Asrgl1	ASGL1_MOUSE Isoaspartyl peptidase/L-asparaginase	21	5176.27	5529.65	4430.14	5715.06	4064.02	4410.51	4854.37	4589.89	4590.05	12.4755	11.9867	10.3802	11.5985	10.6754	11.2728	10.7334	10.2184	10.6591
sp|Q9Z1L5|CA2D3_MOUSE	Cacna2d3	CA2D3_MOUSE Voltage-dependent calcium channel subunit alpha-2/delta-3	21	3017.92	3449.35	3126.83	3514.49	2833.77	2880.97	3199.64	3089.85	3262.41	11.0968	11.4075	11.1774	10.8816	11.3565	11.2339	10.7933	10.4947	11.5582
sp|Q62059-2|CSPG2_MOUSE	Vcan	CSPG2_MOUSE Isoform V1 of Versican core protein	21	3428.39	3858.78	3523.46	4035.7	3101.32	3272.1	3761.58	3623.03	3660.91	11.0959	11.2327	11.0863	10.9984	10.9397	11.2305	11.1687	10.8314	11.4162
sp|P28661|SEPT4_MOUSE	2017-09-04	SEPT4_MOUSE Septin-4	21	3107.62	3291.57	2669.18	3401.37	2781.91	2775.38	3187.62	3151.01	2991.25	11.8523	11.2912	9.89691	10.9237	11.5639	11.2253	11.1533	11.1011	10.9923
sp|P62821|RAB1A_MOUSE	Rab1A	RAB1A_MOUSE Ras-related protein Rab-1A	21	2592.1	2909.19	2420.16	2965.14	2318.97	2363.58	2714.86	2611.28	2435.71	11.602	11.7115	10.531	11.1755	11.3126	11.2189	11.1478	10.7963	10.5043
tr|E9QM38|E9QM38_MOUSE	Slc12a2	E9QM38_MOUSE Solute carrier family 12 member 2	21	3020.5	3254.07	3000.48	3475.67	2616.37	2814.41	3152.33	3444.06	3078.3	11.327	10.9754	10.9388	10.9752	10.6935	11.1924	10.8449	11.9301	11.1226
sp|Q99KJ8|DCTN2_MOUSE	Dctn2	DCTN2_MOUSE Dynactin subunit 2	21	3247.57	3506.07	2972.3	3726.08	2718.97	2829.15	3243.41	2926.08	2881.38	12.0968	11.7461	10.7635	11.687	11.0383	11.1755	11.0835	10.0679	10.3413
sp|Q922Q4|P5CR2_MOUSE	Pycr2	P5CR2_MOUSE Pyrroline-5-carboxylate reductase 2	21	3924.61	4205.77	3738.22	4474.27	3486.82	3491.15	3823.71	3781.85	3684.07	11.8344	11.4066	10.9588	11.3609	11.4595	11.164	10.5778	10.5341	10.7039
sp|P97445|CAC1A_MOUSE	Cacna1a	CAC1A_MOUSE Voltage-dependent P/Q-type calcium channel subunit alpha-1A	21	2841.4	3062.9	3169.93	3397.67	2650.01	2802.37	3471.77	3308.58	3304.77	10.5925	10.2698	11.4885	10.6657	10.7672	11.0788	11.8735	11.3933	11.8706
sp|Q99KY4|GAK_MOUSE	Gak	GAK_MOUSE Cyclin-G-associated kinase	21	3120.38	3642.07	3330.15	3826.61	3181.25	3022.29	3240.8	3476.49	3357.51	10.7794	11.3161	11.184	11.1312	11.9777	11.0719	10.2707	11.0935	11.1755
sp|Q01405|SC23A_MOUSE	Sec23a	SC23A_MOUSE Protein transport protein Sec23A	21	3574.33	3887.62	3662.95	4240.21	3200.79	3342.14	3830.03	3920.74	3796.49	11.1598	10.9171	11.1183	11.1478	10.892	11.0659	10.9705	11.3076	11.421
sp|Q64133|AOFA_MOUSE	Maoa	AOFA_MOUSE Amine oxidase [flavin-containing] A	21	3376.91	3886.46	3616.59	4201.45	3240.56	3212.57	3689.57	3696.76	3488.61	10.8841	11.2665	11.3324	11.4028	11.3837	10.9806	10.9097	11.0062	10.834
sp|Q9WTX6|CUL1_MOUSE	Cul1	CUL1_MOUSE Cullin-1	21	2878.81	3399.85	3081.44	3597.24	2690.93	2770.96	3177.13	3329.63	3079.32	10.7458	11.4142	11.1821	11.3066	10.9475	10.9687	10.8798	11.4805	11.0749
sp|P97300|NPTN_MOUSE	Nptn	NPTN_MOUSE Neuroplastin	21	3437.18	3746.3	3329.58	4078.97	3220.54	3211.44	4146.66	3731.94	3539.11	11.0679	10.8499	10.4231	11.0599	11.3026	10.9663	12.2496	11.1004	10.9804
sp|P05132|KAPCA_MOUSE	Prkaca	KAPCA_MOUSE cAMP-dependent protein kinase catalytic subunit alpha	21	4027.24	4491.63	4034.62	4840.77	3505.31	3601.47	4246.8	3904.87	3810.9	11.5459	11.582	11.2452	11.6862	10.953	10.9496	11.1697	10.3411	10.5271
sp|Q8BLQ9|CADM2_MOUSE	Cadm2	CADM2_MOUSE Cell adhesion molecule 2	21	2685.74	3016.58	2613.76	2989.41	2404.42	2473.97	3189.84	2825.59	2827.98	11.208	11.3225	10.6042	10.5049	10.9361	10.9487	12.2123	10.8922	11.3711
sp|Q3UTQ8|CDKL5_MOUSE	Cdkl5	CDKL5_MOUSE Cyclin-dependent kinase-like 5	21	2958.27	3222.2	3170.16	3560.92	2671.26	2833.14	3643.51	3394.8	3321.15	10.7452	10.5266	11.1945	10.8912	10.575	10.913	12.1411	11.3902	11.6232
sp|P18052|PTPRA_MOUSE	Ptpra	PTPRA_MOUSE Receptor-type tyrosine-protein phosphatase alpha	21	2795.07	3294.68	2948.7	3480.38	2705.69	2655.69	3129.99	2959.88	3169.68	10.7583	11.4058	11.0339	11.2802	11.3505	10.84	11.0524	10.5237	11.7552
sp|Q3UHC7|DAB2P_MOUSE	Dab2ip	DAB2P_MOUSE Disabled homolog 2-interacting protein	21	3165.25	3545.48	3270.23	3697.92	2876.41	2860.14	3359.77	3289.83	3163.3	11.3108	11.3952	11.3608	11.1271	11.2027	10.8386	11.0143	10.8592	10.8915
tr|E9QK04|E9QK04_MOUSE	Neo1	E9QK04_MOUSE Neogenin	21	3299.27	3626.81	3510.78	4032.29	3126.99	3117.99	3820.81	3786.73	3562.52	10.8101	10.6881	11.1831	11.1251	11.1668	10.834	11.485	11.4609	11.2469
sp|Q99LF4|RTCB_MOUSE	Rtcb	RTCB_MOUSE tRNA-splicing ligase RtcB homolog	21	3942.24	4076.24	3814.6	4594.89	3259.71	3494.57	4411.1	4235.89	3968.32	11.5176	10.7113	10.8347	11.3041	10.3797	10.8271	11.823	11.4316	11.1709
sp|Q6PDI5|ECM29_MOUSE	Ecm29	ECM29_MOUSE Proteasome-associated protein ECM29 homolog	21	2556.71	2706.08	2642.84	2966.99	2275.48	2327.61	2853.42	2897.52	2679.01	11.1733	10.6366	11.2284	10.9184	10.8383	10.7873	11.4401	11.6969	11.2807
sp|Q9WUB3|PYGM_MOUSE	Pygm	PYGM_MOUSE Glycogen phosphorylase, muscle form	21	2655.24	3058.95	2997.22	3310.1	2521.32	2470.64	3016.97	2656.14	2720.38	10.9188	11.3137	11.9822	11.4617	11.3002	10.7741	11.3816	10.0893	10.7786
sp|P62908|RS3_MOUSE	Rps3	RS3_MOUSE 40S ribosomal protein S3	21	4048.55	4387.07	3931.98	5018.93	3522.14	3538.42	4176.82	4010.91	3907.82	11.5883	11.2942	10.9416	12.0969	10.9879	10.7407	10.968	10.6049	10.7775
sp|P83741-2|WNK1_MOUSE	Wnk1	WNK1_MOUSE Isoform 2 of Serine/threonine-protein kinase WNK1	21	2449.22	2654.92	2753.91	2898.59	2240.69	2349.44	3030.08	3001.72	2932.46	10.5266	10.263	11.5069	10.4903	10.4962	10.7085	11.9475	11.9172	12.1438
sp|Q8CBW3|ABI1_MOUSE	Abi1	ABI1_MOUSE Abl interactor 1	21	2275.55	2615.04	2455.11	2742.05	2057.87	2084.42	2580.23	2447.81	2363.7	11.0024	11.3721	11.5403	11.1639	10.8444	10.6877	11.4451	10.9325	11.0117
sp|Q5SXY1|CYTSB_MOUSE	Specc1	CYTSB_MOUSE Cytospin-B	21	3848.05	4296.21	4223.27	4641.96	3609.42	3489.11	4128.65	4066.78	3923.22	11.0943	11.1405	11.8373	11.2693	11.3418	10.6677	10.9201	10.8305	10.8984
sp|Q8QZY1|EIF3L_MOUSE	Eif3l	EIF3L_MOUSE Eukaryotic translation initiation factor 3 subunit L	21	3867.75	4272.65	3974.76	4704.44	3525.18	3454.58	4419.2	4252.11	4015.22	11.0848	11.0135	11.0745	11.3531	11.0112	10.4994	11.6191	11.2568	11.0876
sp|P27671|RGRF1_MOUSE	Rasgrf1	RGRF1_MOUSE Ras-specific guanine nucleotide-releasing factor 1	21	2932.65	3269.09	3225.28	3568.9	2710.15	2733.13	3533.26	3574.27	3326.72	10.62	10.6476	11.3548	10.8828	10.6966	10.4961	11.7382	11.9562	11.6076
sp|O35286|DHX15_MOUSE	Dhx15	DHX15_MOUSE Putative pre-mRNA-splicing factor ATP-dependent RNA helicase DHX15	21	3432.14	3661.81	3640.74	4052.59	3077.61	3122.03	3973.45	4303.41	3775.62	10.8609	10.4221	11.2004	10.7987	10.6145	10.477	11.5353	12.5792	11.512
sp|Q8R0S2|IQEC1_MOUSE	Iqsec1	IQEC1_MOUSE IQ motif and SEC7 domain-containing protein 1	21	3227.77	3683.44	3456.08	3937.76	3152.44	2907.96	3499.03	3518.12	3406.71	10.9496	11.2386	11.398	11.2483	11.6555	10.4613	10.8894	11.0242	11.1351
sp|Q8BMJ2|SYLC_MOUSE	Lars	SYLC_MOUSE Leucine--tRNA ligase, cytoplasmic	21	2948.77	3285.4	3303.47	3678.65	2975.39	2783.5	3566.42	3704.28	3393.04	10.3938	10.4156	11.3201	10.9185	11.4305	10.4046	11.5326	12.0609	11.5235
sp|P51830|ADCY9_MOUSE	Adcy9	ADCY9_MOUSE Adenylate cyclase type 9	21	2791.89	3178.9	3103.57	3372.14	2646.17	2472.97	3066.13	2953.62	2873.82	11.0244	11.29	11.9142	11.2125	11.3884	10.3556	11.1073	10.7734	10.934
sp|P27659|RL3_MOUSE	Rpl3	RL3_MOUSE 60S ribosomal protein L3	21	3461.86	3729.65	3686.91	4263.68	3426.68	3093.82	3627.2	4169.04	3688.98	10.907	10.5688	11.2929	11.3115	11.7668	10.337	10.4841	12.1332	11.1986
sp|Q9CQV8|1433B_MOUSE	Ywhab	1433B_MOUSE 14-3-3 protein beta/alpha	21	2238.54	2413.27	2171.8	2687.82	2135.57	1939.41	2569.85	2487.65	2192.72	11.2285	10.8874	10.5907	11.3526	11.675	10.3164	11.8257	11.5262	10.5975
sp|Q9JKR6|HYOU1_MOUSE	Hyou1	HYOU1_MOUSE Hypoxia up-regulated protein 1	21	4327.44	4696.02	4551.12	5119.3	3901.72	3839.7	5422.52	4720.08	5013.28	10.8796	10.6187	11.1236	10.8375	10.6911	10.2371	12.5067	10.9615	12.1441
sp|Q80WJ7|LYRIC_MOUSE	Mtdh	LYRIC_MOUSE Protein LYRIC	21	2930.79	3049.28	3426.79	3557.48	2594.26	2742.02	4144.27	3598.85	3694.95	10.3116	9.6494	11.7213	10.5396	9.94816	10.2309	13.3768	11.6963	12.526
sp|Q9DCX2|ATP5H_MOUSE	Atp5h	ATP5H_MOUSE ATP synthase subunit d, mitochondrial	21	4170.11	4520.49	3941.14	4738.58	3669.59	3506.44	4850.86	4460.69	4336.75	11.4172	11.1317	10.4901	10.9245	10.9501	10.1808	12.1841	11.2812	11.4403
sp|Q3UH66-2|WNK2_MOUSE	Wnk2	WNK2_MOUSE Isoform 2 of Serine/threonine-protein kinase WNK2	21	2003.02	2348.51	2366.28	2477.14	1943.62	1872.9	2409.82	2633.36	2404.05	10.2374	10.7958	11.7575	10.6609	10.8268	10.1512	11.2992	12.4324	11.8388
tr|G3X972|G3X972_MOUSE	Sec24c	G3X972_MOUSE Protein Sec24c	21	2892.77	3498.65	3321.31	3880.49	3100.76	2764.48	3348.94	4003.86	3559.73	9.95864	10.833	11.1158	11.249	11.6343	10.0925	10.5768	12.7323	11.8077
sp|Q5SUR0|PUR4_MOUSE	Pfas	PUR4_MOUSE Phosphoribosylformylglycinamidine synthase	21	3162.22	3331.54	3445.17	3690.14	2662.53	2633.08	3459.01	3501.99	3269.66	11.3471	10.7523	12.0185	11.15	10.413	10.0198	11.3869	11.6078	11.3047
tr|G3X928|G3X928_MOUSE	Sec23ip	G3X928_MOUSE SEC23-interacting protein	21	3349	3458.85	3532.21	3844.62	2959.68	2780.74	3851.53	3667.35	3497.95	11.3152	10.5109	11.6022	10.9381	10.8988	9.96342	11.9383	11.4457	11.3874
sp|O70456|1433S_MOUSE	Sfn	1433S_MOUSE 14-3-3 protein sigma	21	2913.83	3784.94	2747.39	3412.01	2991.6	2461.08	3612.64	3207.07	2869.66	10.883	12.7146	9.97584	10.7308	12.1779	9.74785	12.3785	11.0645	10.327
sp|O89029|MATN4_MOUSE	Matn4	MATN4_MOUSE Matrilin-4	20	2265.54	2391.96	2120.29	2634.25	2000.61	2482.63	2333.78	2232.27	2321.1	11.3566	10.7843	10.3328	11.1192	10.9302	13.1974	10.7324	10.3363	11.2107
sp|Q9CZY3|UB2V1_MOUSE	Ube2v1	UB2V1_MOUSE Ubiquitin-conjugating enzyme E2 variant 1	20	2506.16	2764.45	2399.97	2793.72	2253.63	2501.18	2424.65	2626.64	2471.28	11.4863	11.3957	10.6936	10.7819	11.2575	12.1567	10.1949	11.1202	10.9133
sp|P10493|NID1_MOUSE	Nid1	NID1_MOUSE Nidogen-1	20	2844.47	3933.98	2936.64	3045.22	2642.41	3032.68	3099.32	3430.64	3222.45	10.5292	13.0974	10.5679	9.49184	10.6605	11.9047	10.5249	11.7303	11.4932
sp|Q2M3X8|PHAR1_MOUSE	Phactr1	PHAR1_MOUSE Phosphatase and actin regulator 1	20	2037.47	2256.94	2153.01	2435.46	1842.46	2094.54	2305.26	2222.06	2130.85	10.9182	10.8778	11.2164	10.9896	10.7609	11.9028	11.3329	10.9991	11.0021
sp|Q9WTP7|KAD3_MOUSE	Ak3	KAD3_MOUSE GTP:AMP phosphotransferase AK3, mitochondrial	20	4094.37	4528.93	3776.23	4825.87	3440.4	3892.39	4248.13	3958.19	3754.35	11.7146	11.6546	10.5038	11.6267	10.7284	11.8102	11.1506	10.4611	10.3499
sp|P11531|DMD_MOUSE	Dmd	DMD_MOUSE Dystrophin	20	1839.39	2277.02	1991.91	2280.21	1832	1953.34	2036.6	2103.68	2043.93	10.4552	11.6409	11.0071	10.9137	11.3493	11.7743	10.62	11.0453	11.194
sp|P26041|MOES_MOUSE	Msn	MOES_MOUSE Moesin	20	2174.27	2411.25	2108.58	2385.81	1854.09	2139.99	2326.65	2432.27	2306.73	11.2681	11.2393	10.6236	10.4114	10.4726	11.7611	11.0619	11.6436	11.5184
sp|P30999|CTND1_MOUSE	Ctnnd1	CTND1_MOUSE Catenin delta-1	20	2350.61	2610.47	2512.16	2854.86	2090.24	2364.66	2527.29	2518.12	2490.32	10.9972	10.9845	11.426	11.2467	10.6582	11.732	10.8472	10.8823	11.2258
sp|Q9WV69|DEMA_MOUSE	Dmtn	DEMA_MOUSE Dematin	20	2157.28	2385.38	2225.04	2600.09	1869.38	2179.11	2499.13	2268.14	2423.4	10.936	10.876	10.9657	11.0989	10.3285	11.7147	11.6225	10.6209	11.8369
sp|Q80ZF8|BAI3_MOUSE	Bai3	BAI3_MOUSE Brain-specific angiogenesis inhibitor 3	20	2150.77	2400.78	2257.07	2500.2	1843.95	2127.44	2364.99	2314.39	2222.32	11.1299	11.1741	11.3551	10.8946	10.4	11.675	11.2276	11.0631	11.0807
sp|P62835|RAP1A_MOUSE	Rap1a	RAP1A_MOUSE Ras-related protein Rap-1A	20	5046.32	5495.27	4943.38	5825.37	4176.69	4745.72	5278.56	4905.6	4616.56	11.7065	11.4657	11.1487	11.3793	10.5602	11.6749	11.2339	10.512	10.3189
sp|Q3USB7|PLCL1_MOUSE	Plcl1	PLCL1_MOUSE Inactive phospholipase C-like protein 1	20	2646.31	2893.38	2765.86	3093.78	2231.09	2674.26	3043.17	3050.92	2988.26	10.8903	10.7094	11.0657	10.7209	10.007	11.6709	11.4891	11.5977	11.849
sp|B2RQC6|PYR1_MOUSE	Cad	PYR1_MOUSE CAD protein	20	2054.38	2303.41	2269.34	2553.76	1951.35	2113.62	2199.56	2410.43	2263.11	10.6577	10.7477	11.4454	11.1559	11.0333	11.6282	10.4684	11.551	11.3123
sp|Q9CPY7|AMPL_MOUSE	Lap3	AMPL_MOUSE Cytosol aminopeptidase	20	2756.76	3057.04	2574.22	3187.13	2418.15	2602.37	2859.7	2803.68	2631.91	11.565	11.5347	10.4987	11.2586	11.0564	11.5775	11.0059	10.8646	10.6384
sp|P08226|APOE_MOUSE	Apoe	APOE_MOUSE Apolipoprotein E	20	2703.76	3126.45	2784.09	3077.2	2305.26	2615.81	2979.39	2784.03	2675.61	11.2736	11.7249	11.2856	10.8042	10.4762	11.5665	11.3968	10.7229	10.7493
sp|P31324|KAP3_MOUSE	Prkar2b	KAP3_MOUSE cAMP-dependent protein kinase type II-beta regulatory subunit	20	2847.56	3252.43	2941.61	3564.26	2568.06	2777.78	2957.33	2883.55	2876.8	11.155	11.4595	11.2029	11.7573	10.9645	11.5397	10.6282	10.4344	10.8585
sp|Q9JHR7|IDE_MOUSE	Ide	IDE_MOUSE Insulin-degrading enzyme	20	2990.61	3321.95	3161.86	3374.33	2619.36	2902.59	3233.47	3150.81	3088.94	11.2093	11.1988	11.5214	10.6499	10.7004	11.5373	11.1185	10.9089	11.1555
sp|Q80U35|ARHGH_MOUSE	Arhgef17	ARHGH_MOUSE Rho guanine nucleotide exchange factor 17	20	1993.96	2264.7	2173.42	2421.58	1943.17	2040.82	2333.34	2282.15	2167.21	10.6051	10.8335	11.238	10.8452	11.2641	11.5108	11.3851	11.212	11.1061
sp|P48036|ANXA5_MOUSE	Anxa5	ANXA5_MOUSE Annexin A5	20	3551.38	3771.7	3121.66	3864.1	2991.51	3176.15	3360.1	3542.94	3221.42	12.1124	11.57	10.3506	11.0974	11.1202	11.4878	10.5135	11.1619	10.5863
sp|Q9EQQ9|NCOAT_MOUSE	Mgea5	NCOAT_MOUSE Bifunctional protein NCOAT	20	3680.66	4029.05	3704.19	4099.61	3421.69	3554.88	3961.94	3986.19	3825.14	11.2013	11.0282	10.9593	10.5057	11.3493	11.4727	11.0614	11.2057	11.2163
sp|P59281-2|RHG39_MOUSE	Arhgap39	RHG39_MOUSE Isoform 2 of Rho GTPase-activating protein 39	20	3315.45	3610.74	3451.69	3939.33	2935.16	3189.68	3623.67	3444.67	3417.72	11.1945	10.9653	11.3303	11.2002	10.8014	11.4212	11.2246	10.7436	11.1189
sp|Q8K4G5|ABLM1_MOUSE	Ablim1	ABLM1_MOUSE Actin-binding LIM protein 1	20	2890.91	3589.26	3221.48	3808.81	2885.54	3015.46	3195.02	3429.45	3352.74	10.2768	11.476	11.1333	11.4013	11.1799	11.3678	10.4198	11.2613	11.4838
sp|Q80YN3|BCAS1_MOUSE	Bcas1	BCAS1_MOUSE Breast carcinoma-amplified sequence 1 homolog	20	3071	3081.29	3077.41	3632.33	2686.47	2962.78	3554.44	3320.51	3507.57	11.0985	10.0156	10.8122	11.0537	10.5816	11.3549	11.7846	11.0849	12.2138
sp|Q62077|PLCG1_MOUSE	Plcg1	PLCG1_MOUSE 1-phosphatidylinositol 4,5-bisphosphate phosphodiesterase gamma-1	20	2496.15	2842.43	2640.77	2904.17	2465.63	2480.64	2810.69	2849.31	2745.96	10.7409	11.0007	11.0471	10.5228	11.5634	11.3197	11.0954	11.3253	11.3848
sp|P62743|AP2S1_MOUSE	Ap2s1	AP2S1_MOUSE AP-2 complex subunit sigma	20	2357.36	2575.66	2237.36	2609.83	2041.44	2124.64	2414.94	2316.99	2103.56	11.8417	11.6369	10.9262	11.0392	11.1766	11.3181	11.129	10.7511	10.1813
sp|Q60575|KIF1B_MOUSE	Kif1b	KIF1B_MOUSE Kinesin-like protein KIF1B	20	3286.78	3531.97	3454.26	3672.05	2933.91	3136.49	3616.04	3576.58	3476.39	11.1764	10.8021	11.4191	10.5143	10.8734	11.3103	11.2804	11.2341	11.3899
sp|Q99MN9|PCCB_MOUSE	Pccb	PCCB_MOUSE Propionyl-CoA carboxylase beta chain, mitochondrial	20	2344.62	2871.59	2480.13	3072.66	2319.19	2367.75	2377.61	2760.3	2619.07	10.5523	11.6241	10.8517	11.6447	11.3762	11.3009	9.81697	11.4755	11.3575
tr|V9GX34|V9GX34_MOUSE	Csmd2	V9GX34_MOUSE Protein Csmd2 (Fragment)	20	1940.93	2260.52	2180.65	2429.99	1890.5	1909.98	1992.92	2146.01	1985.82	10.8129	11.3266	11.8104	11.3992	11.4787	11.2839	10.1855	11.0434	10.6594
sp|Q9CQ69|QCR8_MOUSE	Uqcrq	QCR8_MOUSE Cytochrome b-c1 complex subunit 8	20	1934.55	2140.36	1961.01	2291.93	1652.65	1843.74	2257.01	2137.81	1993.83	11.106	11.0516	10.9447	11.0795	10.3406	11.2248	11.887	11.3368	11.0288
sp|Q8BHL5-2|ELMO2_MOUSE	Elmo2	ELMO2_MOUSE Isoform 2 of Engulfment and cell motility protein 2	20	2678.87	2985.72	2647.36	3056.71	2423.02	2471.14	2861.72	2694.96	2670.09	11.4185	11.4464	10.9703	10.9711	11.2565	11.1701	11.1904	10.6109	10.9659
sp|O55126|NIPS2_MOUSE	Gbas	NIPS2_MOUSE Protein NipSnap homolog 2	20	2996.72	3525.22	3072.64	3755.61	2941.18	2899.15	3218.22	3392.41	3085.28	10.8358	11.4647	10.8012	11.4349	11.591	11.1169	10.6756	11.3309	10.749
sp|Q6KAR6|EXOC3_MOUSE	Exoc3	EXOC3_MOUSE Exocyst complex component 3	20	2417.51	2606.77	2507.94	2769.61	2150.86	2200.55	2513.86	2435.67	2367.43	11.486	11.1395	11.5842	11.0805	11.1378	11.0875	10.9573	10.6896	10.8378
tr|E9QK48|E9QK48_MOUSE	Eml2	E9QK48_MOUSE Echinoderm microtubule-associated protein-like 2	20	2638.38	3182.22	2845.62	3413.42	2456.35	2562.65	2780.08	2936.75	2861.68	10.7441	11.6553	11.2656	11.7047	10.9021	11.0668	10.3861	11.0469	11.2283
tr|B1AX58|B1AX58_MOUSE	Pls3	B1AX58_MOUSE Plastin-3	20	2820.63	3248.56	2757.26	3312.63	2613.99	2606.65	3052.2	2940.09	2775.26	11.2755	11.6799	10.7155	11.1507	11.3888	11.0502	11.1934	10.8565	10.6894
sp|Q8K400|STXB5_MOUSE	Stxbp5	STXB5_MOUSE Syntaxin-binding protein 5	20	2593.11	3082.69	2908.17	3260.49	2490.71	2544.92	2852.38	2884.5	2935.93	10.6005	11.3344	11.5578	11.2235	11.0973	11.0327	10.6973	10.8923	11.5642
sp|Q69Z38|PEAK1_MOUSE	Peak1	PEAK1_MOUSE Pseudopodium-enriched atypical kinase 1	20	2469.35	2767.66	3049.59	3209.96	2491.37	2526.19	3100.8	2948.4	2804.51	10.1657	10.2477	12.2051	11.1274	11.1784	11.0286	11.7109	11.212	11.1243
tr|E9PYT0|E9PYT0_MOUSE	Arhgap5	E9PYT0_MOUSE Rho GTPase-activating protein 5	20	3683	3902.35	3898.51	4352.09	3179.27	3451.12	4187.74	4097.92	3936.39	11.0959	10.5742	11.4184	11.0407	10.4394	11.0261	11.5745	11.4042	11.4267
sp|P29533|VCAM1_MOUSE	Vcam1	VCAM1_MOUSE Vascular cell adhesion protein 1	20	3667.19	4175.03	3450.96	3971.73	3158.24	3211.13	3710.56	3610.22	3451.98	11.8166	12.0999	10.8105	10.7766	11.0916	10.9728	10.9689	10.7457	10.7174
sp|P97351|RS3A_MOUSE	Rps3a	RS3A_MOUSE 40S ribosomal protein S3a	20	3424.38	3736.68	3678.04	4355.75	3281.44	3339.3	4110.55	4173.5	3787.8	10.5618	10.3658	11.0286	11.3125	11.0308	10.9223	11.631	11.8905	11.2566
sp|Q9D4H1|EXOC2_MOUSE	Exoc2	EXOC2_MOUSE Exocyst complex component 2	20	3430.7	3865.57	3430.95	3933.06	3102.85	3069	3473.86	3465.33	3350.63	11.5095	11.664	11.1901	11.1108	11.3454	10.9187	10.6917	10.7389	10.8308
sp|P97333|NRP1_MOUSE	Nrp1	NRP1_MOUSE Neuropilin-1	20	2536.25	2902.32	2832.38	3192.42	2445.31	2410.64	2801.49	2747.4	2604.38	10.826	11.1425	11.7537	11.4746	11.3762	10.9122	10.9705	10.8328	10.7113
sp|Q99J31|OPHN1_MOUSE	Ophn1	OPHN1_MOUSE Oligophrenin-1	20	2738.27	3046.28	2944.96	3269.22	2644.33	2578.28	3043.78	3008.72	2909.23	10.916	10.9224	11.4133	10.9741	11.4892	10.8997	11.1317	11.0792	11.1744
sp|A2AGL3|RYR3_MOUSE	Ryr3	RYR3_MOUSE Ryanodine receptor 3	20	2300.86	2615.58	2576.93	2836.97	2131.25	2162.78	2482.88	2491.64	2432.86	10.9111	11.1559	11.8803	11.3285	11.0153	10.8765	10.8017	10.9145	11.1162
sp|P35802|GPM6A_MOUSE	Gpm6a	GPM6A_MOUSE Neuronal membrane glycoprotein M6-a	20	3654.38	3856.1	3868.22	4315.73	3500.7	3327.3	3988.65	3888.58	3456.71	11.264	10.6903	11.5914	11.2014	11.7604	10.876	11.2789	11.0716	10.266
sp|P63001|RAC1_MOUSE	Rac1	RAC1_MOUSE Ras-related C3 botulinum toxin substrate 1	20	3119.22	3502.88	2967.41	3771.67	2860.71	2810.78	3270.23	3240	3135.03	11.3662	11.4804	10.5122	11.5729	11.3614	10.8617	10.9323	10.9058	11.0071
sp|Q3TDK6|ROGDI_MOUSE	Rogdi	ROGDI_MOUSE Protein rogdi homolog	20	3075.41	3430.52	3129.23	3660.65	3013.84	2817.55	3353.75	3302.33	2999.86	11.1525	11.189	11.032	11.1781	11.9118	10.8354	11.1574	11.062	10.4817
sp|Q9Z268|RASL1_MOUSE	Rasal1	RASL1_MOUSE RasGAP-activating-like protein 1	20	2521.63	3222.34	2763.48	3253.59	2512.92	2382.37	2455.21	2751.76	2519.66	10.8069	12.4209	11.5139	11.7415	11.7378	10.8276	9.65319	10.8936	10.4046
sp|P97765|WBP2_MOUSE	Wbp2	WBP2_MOUSE WW domain-binding protein 2	20	2294.35	2488	2302.16	2672.93	1882.84	2027.73	2683.43	2150.56	2325.09	11.5224	11.2382	11.24	11.3035	10.3059	10.7993	12.3634	9.97648	11.2509
sp|Q9CX34|SUGT1_MOUSE	Sugt1	SUGT1_MOUSE Suppressor of G2 allele of SKP1 homolog	20	3999.77	4568.19	3909.24	4717.76	3487.6	3591.85	4088.89	4361.74	4181.89	11.3304	11.639	10.7658	11.2534	10.7677	10.7902	10.6261	11.4133	11.4141
sp|Q9CQ54|NDUC2_MOUSE	Ndufc2	NDUC2_MOUSE NADH dehydrogenase [ubiquinone] 1 subunit C2	20	4545.7	4894.08	4298.79	5220.26	4097.47	3927.29	4617.06	4632.3	4206.1	11.7398	11.3682	10.7933	11.3525	11.5335	10.7561	10.9392	11.0509	10.4665
sp|Q99LI8|HGS_MOUSE	Hgs	HGS_MOUSE Hepatocyte growth factor-regulated tyrosine kinase substrate	20	3992.75	4588.36	4343.15	4807.11	3769.2	3607.53	4076.44	4100.99	4009.88	11.1795	11.5549	11.8223	11.3337	11.5023	10.7117	10.4711	10.6067	10.8179
sp|Q8CGF6|WDR47_MOUSE	Wdr47	WDR47_MOUSE WD repeat-containing protein 47	20	2326.92	2639.83	2573.14	2684.98	2275.64	2077.85	2308.98	2352.49	2238.59	11.2981	11.5282	12.146	10.9775	12.0425	10.6989	10.285	10.551	10.4727
sp|Q8K4Z5|SF3A1_MOUSE	Sf3a1	SF3A1_MOUSE Splicing factor 3A subunit 1	20	2985.45	3157.11	3386.02	3583.57	2676.57	2850.22	3825.02	3669.6	3476.96	10.5407	10.0256	11.6224	10.6541	10.2997	10.6718	12.3895	11.9679	11.8283
tr|B2RSU7|B2RSU7_MOUSE	Gcc2	B2RSU7_MOUSE GRIP and coiled-coil domain containing 2	20	2705.54	2892.02	2715.77	3099.11	2416.57	2448.89	3194.42	3159.6	2931.16	11.0608	10.6339	10.7937	10.6686	10.7676	10.617	11.9808	11.9317	11.546
sp|Q8K021|SCAM1_MOUSE	Scamp1	SCAM1_MOUSE Secretory carrier-associated membrane protein 1	20	2163.55	2378.3	2274.4	2526.91	1884.07	1937.03	2615.06	2208.64	2260.4	11.1717	11.0454	11.4174	10.9871	10.6032	10.6069	12.3878	10.5346	11.246
sp|Q8BHN3|GANAB_MOUSE	Ganab	GANAB_MOUSE Neutral alpha-glucosidase AB	20	3712.82	3891.97	3618.87	4223.76	3245.2	3208.69	4069.9	3868.94	3796.9	11.5327	10.8732	10.9282	11.0476	10.9864	10.5695	11.5977	11.101	11.3637
sp|Q8BMK4|CKAP4_MOUSE	Ckap4	CKAP4_MOUSE Cytoskeleton-associated protein 4	20	3390.8	3626.01	3657.82	4019.26	3106.76	3083.19	3998.13	3799.47	3663.3	10.9538	10.5354	11.4876	10.9332	10.9385	10.5624	11.849	11.3377	11.4024
sp|O35375|NRP2_MOUSE	Nrp2	NRP2_MOUSE Neuropilin-2	20	1809.4	2023.3	1943.82	2211.55	1839.09	1663.56	2077.97	2034.69	1875.21	10.8073	10.8694	11.2872	11.1229	11.9722	10.5371	11.3863	11.2259	10.7918
sp|Q8C8N2|SCAI_MOUSE	Scai	SCAI_MOUSE Protein SCAI	20	2372.24	2661.2	2483.64	2888.02	2307.82	2108.94	2453.38	2574.69	2368.25	11.1504	11.2505	11.3493	11.4307	11.8229	10.5123	10.5794	11.1789	10.7256
sp|O88532|ZFR_MOUSE	Zfr	ZFR_MOUSE Zinc finger RNA-binding protein	20	2524.21	2778.17	3034.24	3176.57	2525.79	2471.44	3295.6	3416.06	3106.36	10.0194	9.91824	11.7088	10.6173	10.927	10.4032	12.0008	12.5251	11.8803
sp|Q6PB44|PTN23_MOUSE	Ptpn23	PTN23_MOUSE Tyrosine-protein phosphatase non-receptor type 23	20	2269.18	2487.28	2444.75	2629.82	2191.99	2057.98	2736.84	2694.39	2513.6	10.7592	10.6071	11.2692	10.4997	11.3276	10.3479	11.9048	11.8009	11.4834
sp|Q61584-3|FXR1_MOUSE	Fxr1	FXR1_MOUSE Isoform B of Fragile X mental retardation syndrome-related protein 1	20	2521.48	2764.62	2609.57	3056.02	2433.67	2252.89	2884.89	2893.86	2707.56	10.921	10.7697	10.9881	11.1455	11.4883	10.3477	11.4629	11.5777	11.2991
tr|E9Q512|E9Q512_MOUSE	Trip11	E9Q512_MOUSE Protein Trip11	20	2366.63	2519.82	2624.8	2800.83	2164.62	2128.61	2836.62	2887.86	2626.96	10.7766	10.3201	11.6197	10.7393	10.7429	10.2789	11.8499	12.147	11.5257
sp|P70207|PLXA2_MOUSE	Plxna2	PLXA2_MOUSE Plexin-A2	20	2480.36	2804.27	2632.24	2898.79	2364.58	2139.62	2692.65	2700.83	2479.28	11.1715	11.36	11.5257	10.9939	11.6075	10.2196	11.126	11.2366	10.7593
sp|A2BH40|ARI1A_MOUSE	Arid1a	ARI1A_MOUSE AT-rich interactive domain-containing protein 1A	20	2005.29	2129.85	2313.65	2492.21	1888.55	1896.44	2626.77	2745.94	2517.12	10.1741	9.71913	11.412	10.6473	10.4432	10.2037	12.2265	12.8691	12.305
sp|Q6NS52-2|DGKB_MOUSE	Dgkb	DGKB_MOUSE Isoform 2 of Diacylglycerol kinase beta	20	2458.94	3038.06	2876.51	3560.84	2587.82	2357.16	3075.46	2901.69	2824.99	10.0241	11.1392	11.4002	12.2233	11.4979	10.1903	11.5019	10.9267	11.0963
sp|Q80XR2|AT2C1_MOUSE	Atp2c1	AT2C1_MOUSE Calcium-transporting ATPase type 2C member 1	20	2251.67	2526.03	2532.25	2746.54	2189.26	1975.73	2405.31	2456.4	2400.19	10.9476	11.0462	11.9692	11.2445	11.6011	10.1869	10.7287	11.032	11.244
sp|Q9R1T2|SAE1_MOUSE	Sae1	SAE1_MOUSE SUMO-activating enzyme subunit 1	20	3073.64	3167.42	2723.53	3429.57	2665.14	2462.96	3186.73	3238.81	2885.48	11.9735	11.0978	10.3145	11.2499	11.3156	10.1748	11.3888	11.6546	10.8305
sp|Q9ESZ8|GTF2I_MOUSE	Gtf2i	GTF2I_MOUSE General transcription factor II-I	20	2517.33	2771.6	2809.22	3079.43	2458.28	2290.86	3037.18	3172.69	2892.29	10.5122	10.4099	11.4048	10.8284	11.1885	10.145	11.6355	12.2383	11.6374
sp|Q3THK7|GUAA_MOUSE	Gmps	GUAA_MOUSE GMP synthase [glutamine-hydrolyzing]	20	3417.23	3738.49	3297.55	3922.25	2927.68	2757.6	3569.04	3587.16	3213.94	11.7479	11.5596	11.0211	11.3543	10.9698	10.0535	11.2564	11.3914	10.646
sp|Q9D8E6|RL4_MOUSE	Rpl4	RL4_MOUSE 60S ribosomal protein L4	20	4420.24	4695.53	4894.43	5259.82	3958.47	3938.77	5939.31	5704.01	5147.49	10.5245	10.0555	11.3293	10.5455	10.2724	9.94528	12.9734	12.5452	11.809
sp|P18242|CATD_MOUSE	Ctsd	CATD_MOUSE Cathepsin D	20	3549.93	3761.03	2897.47	3877.31	3392.95	2712.2	3692.36	3324.35	3250.28	12.1663	11.5932	9.65389	11.1894	12.6736	9.85732	11.6092	10.5241	10.733
tr|Q3UID0|Q3UID0_MOUSE	Smarcc2	Q3UID0_MOUSE SWI/SNF complex subunit SMARCC2	20	2922.27	3043.26	3259.54	3410.81	2691.26	2475.63	3572.62	3492.4	3176.95	10.8944	10.2043	11.8137	10.7073	10.9352	9.78746	12.2189	12.0268	11.4119
sp|O08914|FAAH1_MOUSE	Faah	FAAH1_MOUSE Fatty-acid amide hydrolase 1	19	1878.35	2222.44	2026.06	2314.1	1830.96	2053.1	2017.63	2042.22	2017.91	10.6422	11.3252	11.1597	11.0401	11.3063	12.3357	10.4871	10.688	11.0158
sp|Q9CPU4|MGST3_MOUSE	Mgst3	MGST3_MOUSE Microsomal glutathione S-transferase 3	19	869.626	1010.43	849.471	1041.75	907.347	909.702	794.686	908.376	851.677	11.1151	11.6157	10.5554	11.212	12.6398	12.3305	9.31829	10.7247	10.4886
sp|Q8R071|IP3KA_MOUSE	Itpka	IP3KA_MOUSE Inositol-trisphosphate 3-kinase A	19	3024.6	3646.35	3217.06	3805.8	2817.85	3225.31	2954.81	3163.68	3223.16	10.8538	11.7689	11.2233	11.5001	11.021	12.274	9.7276	10.4869	11.1444
sp|Q9WU79|PROD_MOUSE	Prodh	PROD_MOUSE Proline dehydrogenase 1, mitochondrial	19	1640.51	1956.87	1779.76	2100.81	1684.29	1802.5	1721.9	1866.66	1686.54	10.5323	11.2997	11.1084	11.3572	11.7855	12.2721	10.1418	11.0701	10.4329
sp|Q5SSM3|RHG44_MOUSE	Arhgap44	RHG44_MOUSE Rho GTPase-activating protein 44	19	2421.75	2852.98	2776.49	3019.4	2437.68	2689.97	2680.04	2975.66	2646.95	10.3067	10.9207	11.4877	10.8206	11.3072	12.1406	10.4639	11.6981	10.8542
sp|P61226|RAP2B_MOUSE	Rap2b	RAP2B_MOUSE Ras-related protein Rap-2b	19	2158.55	2457.98	2338.83	2706.08	1614.87	2101.25	2167.13	1768.91	1917.62	11.7441	12.0281	12.3709	12.3976	9.57595	12.1237	10.8169	8.89005	10.0527
sp|Q9WVE8|PACN2_MOUSE	Pacsin2	PACN2_MOUSE Protein kinase C and casein kinase substrate in neurons protein 2	19	3811.86	4287.78	3597.17	4491.69	3211.06	3625.38	3582.15	3521.05	3405.16	11.8706	12.0096	10.8904	11.7784	10.8986	11.9726	10.2339	10.1286	10.2173
sp|Q8C2E7|STRUM_MOUSE	Kiaa0196	STRUM_MOUSE WASH complex subunit strumpellin	19	2331.99	2630.6	2429.73	2669.89	2087.63	2353.36	2467.75	2492.32	2352.55	11.1514	11.314	11.2955	10.7506	10.8803	11.9341	10.8259	11.0089	10.8393
sp|Q9CXZ1|NDUS4_MOUSE	Ndufs4	NDUS4_MOUSE NADH dehydrogenase [ubiquinone] iron-sulfur protein 4, mitochondrial	19	2714.86	3069.9	2785.61	3245.24	2523.95	2729.68	2881.23	2888.54	2606.64	11.1331	11.3228	11.1055	11.2062	11.2808	11.8709	10.8395	10.9418	10.2994
sp|P84086|CPLX2_MOUSE	Cplx2	CPLX2_MOUSE Complexin-2	19	2096.77	2182.64	2436.31	2458.62	2070.44	2313.03	2789.54	2706.06	2512.03	10.1355	9.48939	11.4492	10.0075	10.908	11.857	12.3705	12.083	11.6999
sp|O55023|IMPA1_MOUSE	Impa1	IMPA1_MOUSE Inositol monophosphatase 1	19	3054.81	3349.36	2985.25	3733.5	2412.74	2801.97	2743.8	2535.18	2581.64	12.1896	12.0207	11.5806	12.5447	10.4931	11.8568	10.0443	9.34448	9.92573
sp|Q8K3G9|DP13B_MOUSE	Appl2	DP13B_MOUSE DCC-interacting protein 13-beta	19	3080.63	3466.26	3073.47	3688.61	2853.2	3097.59	3316.13	3309.96	3136.46	11.078	11.211	10.7448	11.1692	11.1825	11.8126	10.9399	10.9947	10.8673
sp|P70441|NHRF1_MOUSE	Slc9a3r1	NHRF1_MOUSE Na(+)/H(+) exchange regulatory cofactor NHE-RF1	19	3242.27	3509.54	3073.57	3702.9	2706.78	3172.68	3675.03	3380.49	3376.49	11.3497	11.0496	10.4598	10.9148	10.327	11.7777	11.802	10.9309	11.3884
sp|Q9CQR4|ACO13_MOUSE	Acot13	ACO13_MOUSE Acyl-coenzyme A thioesterase 13	19	4292.66	4361.31	3608.7	4637.07	3470.38	3823.85	4110.48	3952.18	3792.62	12.4275	11.3562	10.1567	11.3042	10.9502	11.7397	10.9172	10.569	10.5793
sp|Q6WQJ1|DGLA_MOUSE	Dagla	DGLA_MOUSE Sn1-specific diacylglycerol lipase alpha	19	2456.5	2535.74	2323.92	2661.72	2142.19	2327.48	2576.1	2460.99	2495.35	11.6523	10.8183	10.7167	10.6315	11.0749	11.7079	11.2103	10.7831	11.4048
sp|Q6ZWV3|RL10_MOUSE	Rpl10	RL10_MOUSE 60S ribosomal protein L10	19	2716.77	2880.69	2960.92	3524.17	2210.99	2848.3	3407.96	3189.13	3300.12	10.5154	10.0283	11.1415	11.486	9.32707	11.6912	12.1012	11.4021	12.3073
sp|Q8CIB5|FERM2_MOUSE	Fermt2	FERM2_MOUSE Fermitin family homolog 2	19	2782.53	3382.97	2868.83	3408.01	2721.5	2875.16	2919.07	3289.42	3000.1	10.6585	11.655	10.6833	10.9925	11.3619	11.6793	10.2579	11.639	11.0727
sp|Q8BH04|PCKGM_MOUSE	Pck2	PCKGM_MOUSE Phosphoenolpyruvate carboxykinase [GTP], mitochondrial	19	2614.6	2779	2800.29	3115.92	2577.99	2593.17	2609.12	2909.84	2539.06	11.1033	10.6144	11.561	11.1423	11.9321	11.6783	10.1649	11.4145	10.3892
tr|F7BAB2|F7BAB2_MOUSE	Tmem132b	F7BAB2_MOUSE Protein Tmem132b	19	2508.51	2760.26	2395.35	2798.62	2235.58	2347.14	2499.69	2318.3	2404.24	11.7476	11.6264	10.9056	11.0362	11.4107	11.6567	10.7395	10.0287	10.8486
sp|Q8BIZ1|ANS1B_MOUSE	Anks1b	ANS1B_MOUSE Ankyrin repeat and sterile alpha motif domain-containing protein 1B	19	3649.21	4249.8	3692.19	4320.52	3292.92	3549.71	3795.29	3780.9	3524.77	11.255	11.789	11.0708	11.2208	11.0692	11.6102	10.7387	10.7717	10.4747
sp|Q8C7M3-3|TRIM9_MOUSE	Trim9	TRIM9_MOUSE Isoform 3 of E3 ubiquitin-protein ligase TRIM9	19	2512.34	2917.51	2678.42	3087	2539.59	2546.95	2550.33	2741.14	2736.29	10.7748	11.2539	11.1675	11.1483	11.8708	11.5838	10.0343	10.8593	11.3072
sp|Q69ZK0|PREX1_MOUSE	Prex1	PREX1_MOUSE Phosphatidylinositol 3,4,5-trisphosphate-dependent Rac exchanger 1 protein	19	2513.96	2812.27	2539.33	2960.46	2394.5	2561.07	2808.69	3032.4	2874.64	10.7076	10.7734	10.5148	10.6178	11.1157	11.568	10.9749	11.9306	11.7972
sp|P59759|MKL2_MOUSE	Mkl2	MKL2_MOUSE MKL/myocardin-like protein 2	19	2353.08	2568.63	2591.38	2904.77	1946.08	2378.17	2834.63	2699.04	2586.64	10.7655	10.5696	11.5259	11.1905	9.70388	11.5383	11.8975	11.4064	11.4024
sp|Q80U23-2|SNPH_MOUSE	Snph	SNPH_MOUSE Isoform 2 of Syntaphilin	19	2407.1	2802.62	2741.3	3184.06	2273.99	2448.94	2579.04	2530.07	2579.55	10.6802	11.1843	11.8246	11.8961	10.9966	11.5229	10.4979	10.3695	11.0278
tr|E9PUM9|E9PUM9_MOUSE	Nrxn2	E9PUM9_MOUSE Protein Nrxn2	19	2788.58	3114.31	2927.88	3374.42	2664.76	2732.88	2934.75	2871.61	2856.23	11.0759	11.1255	11.3057	11.2859	11.5356	11.5111	10.6937	10.5357	10.9308
sp|Q8BG32|PSD11_MOUSE	Psmd11	PSD11_MOUSE 26S proteasome non-ATPase regulatory subunit 11	19	3032.52	3146.22	3021.15	3508.17	2469.4	2848.49	3278.79	3072.61	3045.84	11.554	10.7815	11.1904	11.2551	10.2543	11.5091	11.4605	10.8137	11.1814
sp|Q62419|SH3G1_MOUSE	Sh3gl1	SH3G1_MOUSE Endophilin-A2	19	2634.29	2846.1	2747.71	3161.97	2397.05	2581.15	2928.31	2798.56	2754.92	11.0667	10.7539	11.2221	11.1854	10.9754	11.4992	11.2858	10.86	11.1513
sp|Q9CWS0|DDAH1_MOUSE	Ddah1	DDAH1_MOUSE N(G),N(G)-dimethylarginine dimethylaminohydrolase 1	19	2755.54	2998.37	2357.48	3054.2	2332.8	2499.67	2797.26	2720.36	2567.7	11.9481	11.6934	9.93776	11.1514	11.0245	11.4942	11.1273	10.8959	10.7275
tr|G5E843|G5E843_MOUSE	Robo1	G5E843_MOUSE Roundabout homolog 1	19	1662.81	1821.53	1884.7	1990.15	1445.02	1655.23	1923.53	1783.73	1785.07	10.8881	10.7278	11.9978	10.9733	10.3127	11.494	11.555	10.789	11.2623
sp|Q8R366|IGSF8_MOUSE	Igsf8	IGSF8_MOUSE Immunoglobulin superfamily member 8	19	1924.85	2091.02	2003.64	2260.53	1681.2	1838.36	2024.96	1998.55	1936.93	11.3167	11.0571	11.4522	11.1911	10.7728	11.4619	10.922	10.8538	10.9723
sp|P61222|ABCE1_MOUSE	Abce1	ABCE1_MOUSE ATP-binding cassette sub-family E member 1	19	3165.3	3597.79	3616.65	4040.4	2654.77	3115.59	3495.61	3239.01	3417.15	10.9117	11.1551	12.1208	11.7285	9.97453	11.3899	11.0551	10.3141	11.3502
sp|Q8BZ98|DYN3_MOUSE	Dnm3	DYN3_MOUSE Dynamin-3	19	2543.54	2838.4	2774.66	3135.62	2132.84	2494.69	2908.18	2760.36	2727.75	10.9397	10.98	11.6018	11.3562	9.99802	11.3785	11.475	10.9667	11.3041
sp|Q921G7|ETFD_MOUSE	Etfdh	ETFD_MOUSE Electron transfer flavoprotein-ubiquinone oxidoreductase, mitochondrial	19	4149.08	4728.99	3902.73	4801.03	3629.36	3829.67	4113.55	4149.63	4002.64	11.6157	11.9075	10.622	11.3179	11.0741	11.3698	10.565	10.731	10.7969
sp|P62196|PRS8_MOUSE	Psmc5	PRS8_MOUSE 26S protease regulatory subunit 8	19	2313.09	2486.34	2325.69	2696.17	1994.92	2206.26	2659.93	2499.2	2390.51	11.2032	10.8311	10.9508	10.996	10.5308	11.332	11.819	11.1813	11.1558
sp|Q9D2G2|ODO2_MOUSE	Dlst	ODO2_MOUSE Dihydrolipoyllysine-residue succinyltransferase component of 2-oxoglutarate dehydrogenase complex, mitochondrial	19	2767.3	3163.23	2920.66	3371.04	2403.66	2632.53	2944.91	2759.23	2792.03	11.2298	11.5454	11.5224	11.5191	10.631	11.3289	10.9635	10.343	10.9169
sp|Q80U40|RIMB2_MOUSE	Rimbp2	RIMB2_MOUSE RIMS-binding protein 2	19	2496.23	2816.61	2544.41	2973.44	2356.8	2379.67	2651.25	2576.17	2543.51	11.1629	11.3287	11.0618	11.1967	11.4869	11.2852	10.8769	10.6416	10.9594
sp|Q6PAV2|HERC4_MOUSE	Herc4	HERC4_MOUSE Probable E3 ubiquitin-protein ligase HERC4	19	2648.39	3006.15	2707.08	3111.13	2448.63	2496.2	2738.33	2813.75	2588.38	11.2578	11.4933	11.1872	11.136	11.3445	11.2526	10.6787	11.0484	10.6014
tr|Q8K1M3|Q8K1M3_MOUSE	Prkar2a	Q8K1M3_MOUSE Protein kinase, cAMP dependent regulatory, type II alpha	19	2032.76	2377.5	1907.14	2390.88	1882.53	1900.62	2188.98	2085.53	1948.78	11.3447	11.9341	10.3475	11.2358	11.4508	11.2487	11.2076	10.7514	10.4793
sp|P47753|CAZA1_MOUSE	Capza1	CAZA1_MOUSE F-actin-capping protein subunit alpha-1	19	2508.92	2909.99	2495.14	3086.86	2281.81	2346.28	2527.53	2498.18	2474.12	11.3338	11.8234	10.958	11.7421	11.2345	11.2401	10.4748	10.4245	10.7689
sp|Q3UMR5|MCU_MOUSE	Mcu	MCU_MOUSE Calcium uniporter protein, mitochondrial	19	3260	3550.12	3495.23	4012.79	2767.93	3051.17	3612.39	3162.84	3227.99	11.3083	11.076	11.787	11.7211	10.4646	11.224	11.4957	10.1344	10.7888
sp|P32921-2|SYWC_MOUSE	Wars	SYWC_MOUSE Isoform 2 of Tryptophan--tRNA ligase, cytoplasmic	19	2881.9	3238.48	2879.2	3540.15	2577.48	2710.21	2990.2	2997.64	2967.18	11.2446	11.3649	10.9215	11.6312	10.9609	11.2142	10.7035	10.804	11.155
sp|Q6PAR5|GAPD1_MOUSE	Gapvd1	GAPD1_MOUSE GTPase-activating protein and VPS9 domain-containing protein 1	19	2085.22	2260.96	2154.18	2454.95	1735.89	1927.08	2208.84	2150.61	2104.55	11.4218	11.1387	11.4712	11.3231	10.3631	11.1939	11.0996	10.8814	11.1072
sp|Q6PAJ1|BCR_MOUSE	Bcr	BCR_MOUSE Breakpoint cluster region protein	19	2232.37	2463.12	2233.17	2489.98	2052.81	2067.98	2357.13	2366.96	2228.98	11.3651	11.2785	11.0528	10.6743	11.3905	11.1648	11.0091	11.1311	10.9339
sp|P43406|ITAV_MOUSE	Itgav	ITAV_MOUSE Integrin alpha-V	19	2094.46	2566.65	2077.77	2628.84	2138.42	2005.95	2093.23	2232.01	2069.51	10.9827	12.105	10.5921	11.6075	12.2213	11.1547	10.0697	10.8112	10.456
sp|P97772|GRM1_MOUSE	Grm1	GRM1_MOUSE Metabotropic glutamate receptor 1	19	2276.04	2466.92	2252.3	2604.4	2101.2	2103.69	2395.33	2399.88	2281.4	11.3739	11.0878	10.9422	10.9592	11.4442	11.1484	10.9814	11.078	10.9848
sp|Q3UJU9|RMD3_MOUSE	Rmdn3	RMD3_MOUSE Regulator of microtubule dynamics protein 3	19	3177.01	3575.27	3282.97	3822.66	2891.52	3014	3630.9	3247.34	3309.88	11.081	11.2158	11.132	11.2271	10.9919	11.1482	11.6182	10.4624	11.1233
sp|Q8C5W0|CLMN_MOUSE	Clmn	CLMN_MOUSE Calmin	19	3473.64	3773.01	3548.88	3993.33	3149.8	3159.68	3558.63	3466.35	3316.05	11.5306	11.2646	11.4526	11.162	11.3956	11.1227	10.8371	10.6287	10.606
sp|P61202|CSN2_MOUSE	Cops2	CSN2_MOUSE COP9 signalosome complex subunit 2	19	2908.7	3217.72	2876.77	3467.9	2539.9	2637.75	2933.82	2914.98	2822.59	11.5475	11.4895	11.103	11.593	10.9899	11.1051	10.6853	10.6897	10.7969
sp|Q64516|GLPK_MOUSE	Gk	GLPK_MOUSE Glycerol kinase	19	2891.04	3493.49	2953.52	3661.9	2649.07	2773.98	3193.99	2944.13	3158.98	10.9053	11.8523	10.831	11.6313	10.8909	11.0965	11.0529	10.2584	11.4813
sp|P11276|FINC_MOUSE	Fn1	FINC_MOUSE Fibronectin	19	1297.97	1653.7	1459.47	1436.45	1212.68	1468.98	1540.26	2161.98	2460.38	9.22245	10.5682	10.0815	8.59432	9.39106	11.0687	10.0401	14.1897	16.844
sp|Q9D7B6|ACAD8_MOUSE	Acad8	ACAD8_MOUSE Isobutyryl-CoA dehydrogenase, mitochondrial	19	2387.12	2677.66	2399.11	2909.27	2178.72	2184.06	2379.34	2457.46	2325.47	11.388	11.4892	11.1268	11.6868	11.3282	11.0494	10.4133	10.8293	10.6892
sp|Q9ESK9|RBCC1_MOUSE	Rb1cc1	RBCC1_MOUSE RB1-inducible coiled-coil protein 1	19	2471.81	2716.51	2708.43	2843.82	2319.86	2296.87	2744.73	2621.61	2472.03	11.12	10.9916	11.8455	10.7729	11.3747	10.9579	11.3279	10.8943	10.7153
sp|P28028|BRAF_MOUSE	Braf	BRAF_MOUSE Serine/threonine-protein kinase B-raf	19	2816.37	3240.23	2907.95	3444.46	2570.99	2671.68	3308.95	3154.62	3030.62	10.8475	11.2248	10.8887	11.1713	10.7927	10.9125	11.6921	11.2235	11.2469
sp|Q8BVQ5|PPME1_MOUSE	Ppme1	PPME1_MOUSE Protein phosphatase methylesterase 1	19	3640.89	4149.76	3661.49	4433.3	3461.07	3328.98	3670.53	3873.76	3633.31	11.2322	11.5144	10.9815	11.5165	11.6373	10.891	10.3883	11.039	10.7999
sp|Q62448|IF4G2_MOUSE	Eif4g2	IF4G2_MOUSE Eukaryotic translation initiation factor 4 gamma 2	19	3097.03	3330.02	3424.83	3722.74	2657.36	2868.38	3612.14	3279.63	3214.23	11.0867	10.7217	11.919	11.2217	10.3679	10.8891	11.8626	10.8448	11.0865
sp|Q148V7|K1468_MOUSE	Kiaa1468	K1468_MOUSE LisH domain and HEAT repeat-containing protein KIAA1468	19	2605.91	2843.11	2611.04	3039.1	2426.96	2316.35	2743.26	2727.76	2570.17	11.392	11.1788	11.0969	11.1873	11.5635	10.7385	11.0019	11.0151	10.8259
sp|Q60803|TRAF3_MOUSE	Traf3	TRAF3_MOUSE TNF receptor-associated factor 3	19	2379.45	2707.28	2871.33	3098.77	2380.55	2303.6	2779.06	2753.49	2632.23	10.3988	10.6415	12.1994	11.4035	11.3389	10.6762	11.1421	11.1156	11.0839
tr|B1AWN6|B1AWN6_MOUSE	Scn2a1	B1AWN6_MOUSE Protein Scn2a1	19	2711.65	3247.7	3046.51	3269.43	2686.98	2600.33	3310.75	3079.05	3075.22	10.4785	11.2877	11.445	10.6385	11.3167	10.656	11.7369	10.9907	11.45
sp|Q9JMA1|UBP14_MOUSE	Usp14	UBP14_MOUSE Ubiquitin carboxyl-terminal hydrolase 14	19	2601.56	2990.1	2666.4	3175.91	2600.13	2348.42	2699.57	2753.66	2610.03	11.1098	11.4847	11.0699	11.4204	12.1019	10.6353	10.5762	10.8624	10.7394
sp|Q91ZP9|NECA2_MOUSE	Necab2	NECA2_MOUSE N-terminal EF-hand calcium-binding protein 2	19	2625.45	3062.43	2579.24	3316.32	2788.42	2408.34	2871.02	2776.78	2671.38	10.9186	11.4548	10.428	11.6134	12.6388	10.6214	10.9537	10.6671	10.7043
sp|G3X9K3|BIG1_MOUSE	Arfgef1	BIG1_MOUSE Brefeldin A-inhibited guanine nucleotide-exchange protein 1	19	2650.61	2924.5	2833.54	3116.47	2359.37	2375.53	3017.42	2845.41	2695.61	11.1631	11.0777	11.6015	11.052	10.8298	10.6096	11.6583	11.0694	10.9385
sp|Q61171|PRDX2_MOUSE	Prdx2	PRDX2_MOUSE Peroxiredoxin-2	19	3566.11	3772.92	2993.28	3902.56	2899.19	2864.69	3461.58	3367.01	3126.71	12.4463	11.8436	10.1564	11.4692	11.0283	10.6029	11.0836	10.855	10.5146
sp|O35633|VIAAT_MOUSE	Slc32a1	VIAAT_MOUSE Vesicular inhibitory amino acid transporter	19	2894.68	3342.88	3169.95	3782.39	2659.36	2710.98	3649.58	2918.22	3267.02	10.6685	11.0811	11.358	11.7384	10.6823	10.5957	12.3397	9.93483	11.6015
sp|Q69ZW3|EHBP1_MOUSE	Ehbp1	EHBP1_MOUSE EH domain-binding protein 1	19	2669.04	2951.84	2976.27	3330.06	2491.16	2495.05	3193.18	3083.43	2926.72	10.6846	10.6282	11.583	11.2252	10.8691	10.5921	11.727	11.4019	11.2888
sp|Q9D0R2|SYTC_MOUSE	Tars	SYTC_MOUSE Threonine--tRNA ligase, cytoplasmic	19	3615.57	3942.67	3767.19	4309.58	3310.62	3203.12	3955.2	3858.61	3655.23	11.238	11.0221	11.3835	11.2794	11.2152	10.5581	11.2783	11.0786	10.9468
sp|Q80X80|C2C2L_MOUSE	C2cd2l	C2C2L_MOUSE C2 domain-containing protein 2-like	19	1948.35	2160.13	2121.11	2414.84	1915.67	1838.44	2395	2408.81	2175.62	10.5073	10.4777	11.1208	10.9661	11.2599	10.5142	11.8493	11.9997	11.305
sp|Q5SW19|CLU_MOUSE	Cluh	CLU_MOUSE Clustered mitochondria protein homolog	19	1903.64	2061.13	2032.52	2216.76	1788.3	1692.21	2155.52	2055.85	1971.36	11.1196	10.8286	11.5421	10.9034	11.385	10.4824	11.551	11.0927	11.0951
sp|Q6P4S6|SIK3_MOUSE	Sik3	SIK3_MOUSE Serine/threonine-protein kinase SIK3	19	2791.47	3166.69	2906.61	3336.08	2910.5	2501.39	2879.27	3116.41	2876.46	10.9939	11.2172	11.1289	11.0636	12.4932	10.4472	10.4031	11.3374	10.9154
sp|Q569Z6|TR150_MOUSE	Thrap3	TR150_MOUSE Thyroid hormone receptor-associated protein 3	19	3984.25	4261.97	4532.34	4927.93	3431.31	3783.33	5389.15	5189.08	5051.57	10.2873	9.8975	11.3769	10.7142	9.65608	10.3593	12.7654	12.3761	12.5673
sp|Q3UPL0|SC31A_MOUSE	Sec31a	SC31A_MOUSE Protein transport protein Sec31A	19	3382.13	3588.43	3411.1	3897.3	2903.17	2900.57	3832.53	3624.26	3565.99	11.3695	10.8497	11.1479	11.032	10.6368	10.3403	11.8195	11.2541	11.5503
sp|Q60675|LAMA2_MOUSE	Lama2	LAMA2_MOUSE Laminin subunit alpha-2	19	2167.28	2403	2370.9	2424.98	1897.26	1938.6	2638.76	2550.24	2418.83	10.8874	10.8574	11.579	10.2579	10.3878	10.3276	12.1611	11.834	11.7079
sp|Q8CGF7|TCRG1_MOUSE	Tcerg1	TCRG1_MOUSE Transcription elongation regulator 1	19	2507.34	2569.45	2969.41	3049.88	2246.32	2350.07	3262.87	3359.03	3081.06	10.3274	9.51869	11.8903	10.5779	10.084	10.265	12.3293	12.78	12.2275
sp|Q3TKT4|SMCA4_MOUSE	Smarca4	SMCA4_MOUSE Transcription activator BRG1	19	2577.11	2636.37	3052.16	3096.5	2433.59	2419.42	3457.35	3450.01	3203.33	10.2322	9.41467	11.7812	10.3526	10.5311	10.1871	12.5934	12.6532	12.2546
sp|Q9R190|MTA2_MOUSE	Mta2	MTA2_MOUSE Metastasis-associated protein MTA2	19	2053.74	2230.96	2226.67	2443.43	1917.66	1846.19	2440.97	2609.71	2361.43	10.6656	10.4206	11.242	10.6851	10.8542	10.1676	11.6296	12.5191	11.8162
tr|A2BDX0|A2BDX0_MOUSE	Adnp	A2BDX0_MOUSE Activity-dependent neuroprotector homeobox protein	19	2440.99	2627.08	2716.95	2925.89	2301.05	2169.29	2917.79	2947.03	2692.96	10.748	10.4039	11.6303	10.8482	11.0427	10.1293	11.7863	11.9864	11.4249
sp|Q08331|CALB2_MOUSE	Calb2	CALB2_MOUSE Calretinin	19	2215.23	2494.1	2101.32	2616.3	2100.14	1865.24	2706.08	2654.07	2204.33	11.0598	11.1997	10.1993	10.9991	11.4279	9.87564	12.3946	12.2401	10.604
sp|Q61001|LAMA5_MOUSE	Lama5	LAMA5_MOUSE Laminin subunit alpha-5	19	1827.29	2147.46	2401.79	1985.44	1802.64	1705.8	2576.03	2868.95	2722.59	9.52911	10.0724	12.1766	8.71849	10.2457	9.43351	12.3242	13.82	13.6801
sp|Q8CH25|SLTM_MOUSE	Sltm	SLTM_MOUSE SAFB-like transcription modulator	19	2195.92	2380.21	2624.14	2754.79	2144.32	1863.37	2929.95	3056.02	2647.47	10.1746	9.91918	11.8204	10.748	10.8287	9.15585	12.4543	13.0797	11.8193
sp|Q8VHW2|CCG8_MOUSE	Cacng8	CCG8_MOUSE Voltage-dependent calcium channel gamma-8 subunit	18	2042.42	2298.47	2331.62	2601.93	1477.98	2203.93	2151.8	1806.27	2065.36	11.2542	11.3912	12.4903	12.0727	8.87616	12.8786	10.8776	9.19376	10.9655
sp|Q3UHF7|ZEP2_MOUSE	Hivep2	ZEP2_MOUSE Transcription factor HIVEP2	18	1117.68	1782.24	1274.1	2124.23	1147.36	1990.89	2565.44	2914.31	2492.16	6.75065	9.68178	7.48132	10.8036	7.55292	12.7519	14.2151	16.2594	14.5033
sp|P97447|FHL1_MOUSE	Fhl1	FHL1_MOUSE Four and a half LIM domains protein 1	18	2690.98	3290.2	2858.34	3451.92	2464.43	2887.42	2457.5	2530.58	2722.83	11.0743	12.1784	11.4358	11.962	11.0537	12.6013	9.27812	9.6198	10.7966
tr|E0CXZ9|E0CXZ9_MOUSE	Kcnab2	E0CXZ9_MOUSE Voltage-gated potassium channel subunit beta-2	18	2046.11	2271.37	1643.04	2300.74	1705.85	1950.28	1846.36	1876.95	1852.57	12.2056	12.1865	9.52847	11.5567	11.0906	12.3375	10.1043	10.3424	10.6479
sp|P62137|PP1A_MOUSE	Ppp1ca	PP1A_MOUSE Serine/threonine-protein phosphatase PP1-alpha catalytic subunit	18	2010.47	2326.04	2008.12	2541.45	1716.45	2083.84	1979.97	2000.05	2081.7	11.2034	11.6582	10.879	11.9254	10.4249	12.3145	10.1222	10.2952	11.1772
sp|P19157|GSTP1_MOUSE	Gstp1	GSTP1_MOUSE Glutathione S-transferase P 1	18	1993.53	1967.71	1874.62	2362.87	1466.8	1866.32	1857.2	1660.99	1761.4	12.391	11.0003	11.3277	12.3669	9.93667	12.3018	10.5902	9.53655	10.5488
sp|Q91YR1|TWF1_MOUSE	Twf1	TWF1_MOUSE Twinfilin-1	18	3079.2	3340.23	3083.21	3743.68	2623.1	3170.85	3183.66	3204.39	3199.71	11.2304	10.9571	10.9322	11.4973	10.427	12.264	10.6523	10.7955	11.2442
sp|Q61753|SERA_MOUSE	Phgdh	SERA_MOUSE D-3-phosphoglycerate dehydrogenase	18	2606.06	2877.43	2484.82	3094.4	2072.08	2514	2564.15	2432.3	2421.9	11.8068	11.725	10.9444	11.805	10.2316	12.0785	10.6575	10.179	10.5722
sp|Q920B9|SP16H_MOUSE	Supt16h	SP16H_MOUSE FACT complex subunit SPT16	18	2206.57	1821.01	2258.11	2096.35	1963.88	2095.49	2084.74	2705.22	1985.31	11.9326	8.85711	11.8716	9.54601	11.575	12.0172	10.3426	13.5133	10.3445
sp|P24369|PPIB_MOUSE	Ppib	PPIB_MOUSE Peptidyl-prolyl cis-trans isomerase B	18	3475.5	3314.14	3151.09	3705.08	2689.36	3157.99	3823.06	3306.85	3069.91	12.2207	10.4812	10.7717	10.9702	10.3066	11.7758	12.3325	10.7407	10.4008
sp|Q03141|MARK3_MOUSE	Mark3	MARK3_MOUSE MAP/microtubule affinity-regulating kinase 3	18	3461.26	3829.35	3553.8	4125.41	2902.83	3373.24	3803.74	3623.06	3513.31	11.2391	11.1836	11.2185	11.2798	10.2732	11.6157	11.331	10.8671	10.992
sp|Q8CGM1|BAI2_MOUSE	Bai2	BAI2_MOUSE Brain-specific angiogenesis inhibitor 2	18	1964.93	2140.71	2026.52	2261.92	1800.68	1936.83	2074.39	2199.3	2064.06	11.0982	10.8748	11.1276	10.7577	11.0848	11.601	10.7487	11.4744	11.2328
sp|Q8BHZ0|FA49A_MOUSE	Fam49a	FA49A_MOUSE Protein FAM49A	18	1608.42	1773.51	1597.01	1930.15	1368.77	1538.42	1615.94	1657.62	1612.1	11.4302	11.3357	11.0334	11.5501	10.6016	11.5939	10.5352	10.8813	11.0385
tr|D3YWQ0|D3YWQ0_MOUSE	Dgki	D3YWQ0_MOUSE Diacylglycerol kinase	18	2013.05	2329.39	2020.51	2386.73	1905.41	1965.31	1975.04	2169.14	2088.52	11.1397	11.5937	10.8699	11.1214	11.4919	11.5332	10.0266	11.0878	11.1357
sp|Q9CR68|UCRI_MOUSE	Uqcrfs1	UCRI_MOUSE Cytochrome b-c1 complex subunit Rieske, mitochondrial	18	2445.02	2670.86	2444.87	2842.74	2017.29	2314.68	2703.39	2382.1	2428.36	11.4836	11.2826	11.1634	11.2427	10.3264	11.5289	11.6484	10.3347	10.9893
sp|Q9CQN1|TRAP1_MOUSE	Trap1	TRAP1_MOUSE Heat shock protein 75 kDa, mitochondrial	18	3434.88	3665.14	3262.76	3871.02	2980.29	3186.85	3546.36	3349.68	3339.49	11.7008	11.2293	10.8052	11.1037	11.0649	11.5124	11.0827	10.5401	10.9608
sp|P15208|INSR_MOUSE	Insr	INSR_MOUSE Insulin receptor	18	2624.97	3001.21	2765.53	3240.28	2271.61	2531.25	2664.28	2656.1	2680.3	11.2266	11.5446	11.4987	11.6693	10.5887	11.4804	10.4535	10.4932	11.045
sp|Q8K4I3|ARHG6_MOUSE	Arhgef6	ARHG6_MOUSE Rho guanine nucleotide exchange factor 6	18	1610.99	1834.68	1651.42	1939.84	1508.25	1536.57	1634.61	1632.73	1550.62	11.2852	11.5595	11.2466	11.4425	11.5153	11.4148	10.5049	10.5651	10.4661
sp|Q9Z2W9|GRIA3_MOUSE	Gria3	GRIA3_MOUSE Glutamate receptor 3	18	2182.24	2464.53	2383.91	2552.3	1917.25	2076.29	2184.43	2216.59	2174.88	11.3045	11.4827	12.0056	11.1332	10.8247	11.4061	10.3812	10.6066	10.8554
sp|P35585|AP1M1_MOUSE	Ap1m1	AP1M1_MOUSE AP-1 complex subunit mu-1	18	2333.41	2514.24	2189.7	2463.82	1954.86	2070.69	2397.14	2168.9	1999.52	12.1191	11.7449	11.0564	10.7753	11.0658	11.405	11.4218	10.4055	10.0062
sp|Q8CFI0-3|NED4L_MOUSE	Nedd4l	NED4L_MOUSE Isoform 3 of E3 ubiquitin-protein ligase NEDD4-like	18	1921.75	2090.04	1957.58	2179.76	1699.72	1808.39	2030.69	1986.22	1878.29	11.4268	11.1775	11.316	10.9138	11.0152	11.403	11.0773	10.9093	10.761
sp|O70435|PSA3_MOUSE	Psma3	PSA3_MOUSE Proteasome subunit alpha type-3	18	3256.45	3491.8	2817.9	3596.3	2796.46	2888.12	3164.87	3182.07	2864.7	12.1155	11.6844	10.1922	11.2665	11.3394	11.3949	10.8022	10.9357	10.2692
sp|P54227|STMN1_MOUSE	Stmn1	STMN1_MOUSE Stathmin	18	3519.88	4094.31	3486.82	4190.98	3018.87	3413.88	4113.62	3648.11	3754.42	11.0713	11.5827	10.6621	11.1	10.349	11.3872	11.8701	10.5993	11.3782
sp|Q8R3V5|SHLB2_MOUSE	Sh3glb2	SHLB2_MOUSE Endophilin-B2	18	2451.8	3303.45	2680.23	3215.81	2543.46	2565.49	2504.62	3060.9	2634.11	10.2618	12.4356	10.9058	11.3336	11.6025	11.387	9.61705	11.8339	10.6227
sp|Q9QYY8|SPAST_MOUSE	Spast	SPAST_MOUSE Spastin	18	1673.31	1822	1850.57	2021.92	1484.32	1649.13	1937.6	1862.19	1747.72	10.8925	10.6675	11.7113	11.083	10.5309	11.3843	11.5712	11.1974	10.9619
sp|Q9CWK8|SNX2_MOUSE	Snx2	SNX2_MOUSE Sorting nexin-2	18	2480.56	2769.88	2519.21	2902.2	2074.71	2325.01	2622.58	2517.31	2442.48	11.4437	11.4931	11.2987	11.2741	10.4318	11.3747	11.0996	10.7274	10.857
sp|Q69ZR2|HECD1_MOUSE	Hectd1	HECD1_MOUSE E3 ubiquitin-protein ligase HECTD1	18	1613.31	1717.6	1771.26	1916.98	1425.2	1585.84	1870.5	1792.39	1751.21	10.9093	10.4463	11.6441	10.9153	10.5037	11.372	11.6037	11.1957	11.4098
sp|Q6ZQK5|ACAP2_MOUSE	Acap2	ACAP2_MOUSE Arf-GAP with coiled-coil, ANK repeat and PH domain-containing protein 2	18	2419.43	2756.49	2437.27	2760.7	2230.32	2301.89	2508.2	2594.21	2450.65	11.241	11.5188	11.0088	10.8006	11.2939	11.3416	10.6909	11.1336	10.9707
sp|Q9D1A2|CNDP2_MOUSE	Cndp2	CNDP2_MOUSE Cytosolic non-specific dipeptidase	18	2504.29	2735.12	2317.46	2811.49	2055.02	2249.03	2501.6	2465.96	2366.87	11.8896	11.6794	10.6965	11.2398	10.6337	11.3234	10.8958	10.8146	10.8272
sp|Q9Z0V2|KCND2_MOUSE	Kcnd2	KCND2_MOUSE Potassium voltage-gated channel subfamily D member 2	18	1497.78	1642.15	1491.12	1661.2	1366.54	1409.36	1576.06	1617.06	1514.65	11.3415	11.184	10.9769	10.5921	11.278	11.3173	10.9485	11.3107	11.0509
sp|Q64010|CRK_MOUSE	Crk	CRK_MOUSE Adapter molecule crk	18	2803.57	2974.64	2391.53	3068.89	2275.82	2402.35	2535.14	2562.37	2504.47	12.4481	11.8792	10.3232	11.474	11.0133	11.3117	10.3266	10.5093	10.7145
sp|Q9Z1P6|NDUA7_MOUSE	Ndufa7	NDUA7_MOUSE NADH dehydrogenase [ubiquinone] 1 alpha subcomplex subunit 7	18	2344.75	2577.13	2280.09	2821.38	2104.24	2180.74	2463.63	2347.84	2238.13	11.4677	11.3365	10.8413	11.6194	11.2167	11.3106	11.054	10.607	10.547
sp|Q91YJ2|SNX4_MOUSE	Snx4	SNX4_MOUSE Sorting nexin-4	18	1804.51	1975.87	1776.98	2141.53	1601.36	1657.69	1782.07	1816.51	1690.19	11.5993	11.4233	11.1045	11.5914	11.2188	11.2999	10.5089	10.7857	10.4681
sp|Q9R1R2|TRIM3_MOUSE	Trim3	TRIM3_MOUSE Tripartite motif-containing protein 3	18	2051	2354.42	2252.42	2583.49	1849.99	2021.59	2343.78	2263.13	2128.1	10.8032	11.154	11.5341	11.4586	10.6205	11.2922	11.3257	11.0113	10.8004
sp|Q8BTG7-3|NDRG4_MOUSE	Ndrg4	NDRG4_MOUSE Isoform 3 of Protein NDRG4	18	2215.6	2580.78	2187.08	2857.07	2090.78	2144.43	2356.47	2354.32	2289.18	10.9879	11.5116	10.5447	11.9312	11.3011	11.2781	10.7213	10.7853	10.9387
sp|O70481|UBR1_MOUSE	Ubr1	UBR1_MOUSE E3 ubiquitin-protein ligase UBR1	18	1760.91	2068.86	1875.44	2249.3	1757.67	1792.79	1976.95	2118.71	2033.81	10.4281	11.0194	10.7973	11.2164	11.3447	11.2589	10.7405	11.5899	11.6048
sp|P02089|HBB2_MOUSE	Hbb-b2	HBB2_MOUSE Hemoglobin subunit beta-2	18	2314.09	2472.24	1761.68	2258.21	1736.78	2009.09	2128.44	2281.18	2794.93	12.2256	11.7474	9.04826	10.046	10.0005	11.2562	10.3161	11.1325	14.2274
sp|Q9QYJ0|DNJA2_MOUSE	Dnaja2	DNJA2_MOUSE DnaJ homolog subfamily A member 2	18	3544.48	4146.5	3726.55	4336.02	3712.09	3544.04	3824.76	4232.33	3790.15	10.6051	11.1585	10.8397	10.9243	12.1051	11.2451	10.4985	11.6972	10.9265
sp|Q9Z2Y3|HOME1_MOUSE	Homer1	HOME1_MOUSE Homer protein homolog 1	18	2939.9	3259.3	2720.51	3282.78	2625.89	2669.14	3135.51	2814.64	2833.58	11.6757	11.6422	10.5038	10.9782	11.3661	11.2414	11.424	10.3256	10.8429
tr|E9Q6P5|E9Q6P5_MOUSE	Ttc7b	E9Q6P5_MOUSE Protein Ttc7b	18	3362.28	3746.48	3274.04	3878.92	2954.7	3086.68	3463.19	3357.08	3286.17	11.5466	11.5719	10.9308	11.2168	11.0591	11.2412	10.9108	10.6493	10.8735
tr|F7AA26|F7AA26_MOUSE	Palm2Akap2	F7AA26_MOUSE Protein Palm2Akap2 (Fragment)	18	2236.62	2568.13	2377.9	2759.81	2030.44	2157.81	2509.58	2366	2339.94	10.95	11.3084	11.3178	11.3773	10.8342	11.203	11.2715	10.6998	11.0379
sp|Q80TE4|SI1L2_MOUSE	Sipa1l2	SI1L2_MOUSE Signal-induced proliferation-associated 1-like protein 2	18	2071.18	2254.07	2285.95	2471.43	1855.51	2027.36	2398.75	2453.95	2339.64	10.7338	10.5066	11.5172	10.785	10.4806	11.1421	11.4046	11.7474	11.6827
sp|Q8VHL1|SETD7_MOUSE	Setd7	SETD7_MOUSE Histone-lysine N-methyltransferase SETD7	18	2124.21	2427.52	2013.37	2406.4	1889.5	1878.37	2037.19	1947	1958.83	11.8688	12.1993	10.9366	11.3219	11.5065	11.1299	10.4425	10.0489	10.5456
sp|Q9R0P5|DEST_MOUSE	Dstn	DEST_MOUSE Destrin	18	3372.03	4032	3490.95	4174.01	3217.3	3149.55	3182.16	3419.89	3313.07	11.2311	12.0784	11.3037	11.7064	11.679	11.1244	9.72327	10.5216	10.6322
sp|A2AF47|DOC11_MOUSE	Dock11	DOC11_MOUSE Dedicator of cytokinesis protein 11	18	1397.54	1554.31	1546.63	1764.3	1453.25	1373.05	1587.43	1582.9	1443.67	10.6405	10.6437	11.448	11.3112	12.0593	11.0862	11.088	11.1324	10.5907
sp|O88704|HCN1_MOUSE	Hcn1	HCN1_MOUSE Potassium/sodium hyperpolarization-activated cyclic nucleotide-gated channel 1	18	3020.18	3589.25	3292.97	3528.9	2677.44	2829.43	3284.47	3130.52	2973.89	11.1403	11.9078	11.8086	10.9609	10.764	11.0679	11.1146	10.6665	10.5694
sp|Q9DBR7|MYPT1_MOUSE	Ppp1r12a	MYPT1_MOUSE Protein phosphatase 1 regulatory subunit 12A	18	3074.11	3424.83	3290.32	3680.92	2695.36	2897.36	3379.61	3279.96	3303.22	11.0675	11.09	11.5164	11.159	10.5763	11.062	11.1624	10.9079	11.4585
sp|Q61838|A2M_MOUSE	A2m	A2M_MOUSE Alpha-2-macroglobulin	18	4060.61	3807.33	2748.89	3600.82	2806.8	3278.18	3949.79	4418.47	4148.92	12.9205	10.8961	8.5034	9.64783	9.7339	11.0617	11.5299	12.9868	12.7199
sp|P00493|HPRT_MOUSE	Hprt1	HPRT_MOUSE Hypoxanthine-guanine phosphoribosyltransferase	18	2497.3	2805.79	2356.48	2878.11	2172.15	2173.05	2368.31	2297.34	2213.69	11.9861	12.1122	10.9956	11.632	11.3628	11.0606	10.4282	10.1853	10.2373
sp|Q8C7R4|UBA6_MOUSE	Uba6	UBA6_MOUSE Ubiquitin-like modifier-activating enzyme 6	18	1776.61	1912.56	1854.33	2092.95	1607.7	1662.16	1956.57	1935.42	1855.11	11.1407	10.7869	11.3046	11.0514	10.9878	11.0533	11.2558	11.2108	11.2086
sp|Q9Z1N9|UN13B_MOUSE	Unc13b	UN13B_MOUSE Protein unc-13 homolog B	18	2256.73	2542.81	2332.07	2572.01	2114.66	2041.41	2320.58	2229.62	2110.46	11.4739	11.6281	11.5271	11.0115	11.7182	11.0069	10.8241	10.4714	10.3388
sp|Q9QZC2|PLXC1_MOUSE	Plxnc1	PLXC1_MOUSE Plexin-C1	18	2473.23	2994.03	3035.69	3373.91	2438	2451.88	2679.21	2798.24	2461.12	10.4666	11.3961	12.4895	12.023	11.2451	11.0037	10.4018	10.9387	10.0354
sp|P47738|ALDH2_MOUSE	Aldh2	ALDH2_MOUSE Aldehyde dehydrogenase, mitochondrial	18	2207.16	2600.98	2124.63	2581.11	2057.17	1987.41	2180.42	2226.93	2078.17	11.4987	12.1874	10.7608	11.3229	11.6807	10.98	10.4211	10.7167	10.4317
sp|Q6PDL0|DC1L2_MOUSE	Dync1li2	DC1L2_MOUSE Cytoplasmic dynein 1 light intermediate chain 2	18	2496.18	2813.1	2628.35	2977.46	2322.31	2343.95	2793.25	2817.15	2516.6	10.9987	11.1484	11.2589	11.0472	11.1526	10.9526	11.2912	11.4662	10.6842
sp|Q8BWQ6|CP062_MOUSE		CP062_MOUSE UPF0505 protein C16orf62 homolog	18	1834.24	2053.34	1971.08	2132.73	1688	1763.65	2213.71	2123.27	2063.26	10.737	10.8105	11.217	10.5124	10.7692	10.9481	11.888	11.4808	11.637
sp|Q7TMB8|CYFP1_MOUSE	Cyfip1	CYFP1_MOUSE Cytoplasmic FMR1-interacting protein 1	18	2330.75	2687.35	2416.36	2755.76	2210.29	2138.69	2410.43	2418.61	2317.43	11.2202	11.6356	11.3087	11.1708	11.5969	10.9182	10.6454	10.755	10.7491
sp|Q9JKD3|SCAM5_MOUSE	Scamp5	SCAM5_MOUSE Secretory carrier-associated membrane protein 5	18	2977.65	3129.16	3117.75	3335.94	2728.89	2670.67	3219.56	3161	2787.61	11.4534	10.8255	11.6587	10.8048	11.4402	10.8938	11.361	11.2312	10.3313
sp|Q8K0C9|GMDS_MOUSE	Gmds	GMDS_MOUSE GDP-mannose 4,6 dehydratase	18	2932.71	3457.7	3093.55	3549.95	2700.78	2747.81	3151.7	3253.93	3100.02	10.9507	11.6124	11.2299	11.1618	10.9913	10.8808	10.7964	11.2234	11.1532
sp|Q8K1N1|PLPL8_MOUSE	Pnpla8	PLPL8_MOUSE Calcium-independent phospholipase A2-gamma	18	1928.75	2184.12	2009.07	2298.92	1832.3	1827.55	2261.25	2224.59	2057.55	10.818	11.0181	10.955	10.8576	11.2009	10.8702	11.6353	11.5255	11.1194
sp|O35737|HNRH1_MOUSE	Hnrnph1	HNRH1_MOUSE Heterogeneous nuclear ribonucleoprotein H	18	1387.97	1775.81	1679.05	1953.51	1432.43	1473.04	1655.66	1997.19	1702.3	9.64555	11.0995	11.3438	11.4315	10.8494	10.8558	10.5555	12.8206	11.3984
sp|O55201|SPT5H_MOUSE	Supt5h	SPT5H_MOUSE Transcription elongation factor SPT5	18	1740.29	1827.6	1836.87	2001.29	1556.22	1601.36	1973.82	2005.06	1802.85	11.1205	10.5038	11.4111	10.7685	10.8383	10.8516	11.571	11.8351	11.1001
sp|Q8C754|VPS52_MOUSE	Vps52	VPS52_MOUSE Vacuolar protein sorting-associated protein 52 homolog	18	1975.33	2171.5	1993.39	2327.2	1720.17	1755.55	2052.25	2010.55	1935.43	11.5064	11.3768	11.2885	11.4149	10.9209	10.8446	10.9671	10.8182	10.8627
tr|Q5SUH7|Q5SUH7_MOUSE	Clint1	Q5SUH7_MOUSE Clathrin interactor 1	18	2119.74	2339.27	2162.86	2631.59	1928.29	1932.58	2385.99	2253.54	2120.28	11.1525	11.0695	11.0627	11.6586	11.0572	10.7827	11.5164	10.952	10.7484
sp|Q7SIG6|ASAP2_MOUSE	Asap2	ASAP2_MOUSE Arf-GAP with SH3 domain, ANK repeat and PH domain-containing protein 2	18	1501.72	1817.85	1751.9	1838.6	1483.98	1453.42	1659.06	1758.6	1695.83	10.4816	11.4119	11.8876	10.806	11.2889	10.7579	10.6233	11.3382	11.4046
sp|Q9CR62|M2OM_MOUSE	Slc25a11	M2OM_MOUSE Mitochondrial 2-oxoglutarate/malate carrier protein	18	2472.97	2816.5	2483.57	2914.33	2283.2	2185.1	2504.42	2467.12	2417.62	11.4562	11.7353	11.1852	11.3684	11.528	10.7348	10.6436	10.5573	10.7912
sp|Q8R3Q2|PP6R2_MOUSE	Ppp6r2	PP6R2_MOUSE Serine/threonine-protein phosphatase 6 regulatory subunit 2	18	1341.24	1506.37	1433.35	1596.14	1301.44	1257.26	1528.62	1515.88	1490.54	10.7955	10.905	11.2159	10.8179	11.4168	10.7315	11.2874	11.2704	11.5595
sp|P15532|NDKA_MOUSE	Nme1	NDKA_MOUSE Nucleoside diphosphate kinase A	18	4270.52	4781.75	4084.91	4891.05	3939.88	3670.58	4328.8	4044.6	3869.6	11.7699	11.8533	10.9451	11.3509	11.8348	10.7282	10.9451	10.2969	10.2759
sp|Q8R016|BLMH_MOUSE	Blmh	BLMH_MOUSE Bleomycin hydrolase	18	3646.83	4216.94	3621.17	4406.21	3316.55	3283.8	3904.68	3815.71	3760.75	11.2218	11.6709	10.8328	11.417	11.1229	10.7158	11.0228	10.8458	11.1502
sp|Q8BJI1|S6A17_MOUSE	Slc6a17	S6A17_MOUSE Sodium-dependent neutral amino acid transporter SLC6A17	18	2172.09	2487.43	2248.03	2724.34	2153.97	1997.72	2425.92	2288.58	2155.39	10.9861	11.3156	11.0538	11.6029	11.8738	10.7152	11.2565	10.6923	10.5039
sp|P25976|UBF1_MOUSE	Ubtf	UBF1_MOUSE Nucleolar transcription factor 1	18	2164.02	2297.91	2350.57	2588.7	1915.75	2053.02	2633.44	2741.15	2505.28	10.6482	10.1697	11.2444	10.726	10.274	10.713	11.8878	12.4592	11.8777
sp|Q9R1L5|MAST1_MOUSE	Mast1	MAST1_MOUSE Microtubule-associated serine/threonine-protein kinase 1	18	1926.91	2218.04	2402.14	2620.25	1969.44	1941.37	2479.13	2388.66	2169.7	10.015	10.3686	12.1377	11.4676	11.1563	10.7004	11.8209	11.4679	10.8656
sp|P46471|PRS7_MOUSE	Psmc2	PRS7_MOUSE 26S protease regulatory subunit 7	18	3346.2	3516.6	3155.07	3757.72	2887.68	2820.12	3458.22	3193.33	3168.59	11.9278	11.2743	10.9336	11.279	11.2187	10.6604	11.3089	10.5146	10.8827
tr|E9QB02|E9QB02_MOUSE	Mars	E9QB02_MOUSE Methionine--tRNA ligase, cytoplasmic	18	2802.12	2956.08	3152.92	3524.34	2524.96	2585.03	3334.77	3071.3	3021.06	10.8633	10.3075	11.8833	11.5052	10.6689	10.6278	11.8605	10.9987	11.2849
sp|O88712|CTBP1_MOUSE	Ctbp1	CTBP1_MOUSE C-terminal-binding protein 1	18	2402.71	2667.17	2150.09	2724.96	2096.97	1963.61	2275.42	2110.63	2114.08	12.241	12.2216	10.6492	11.69	11.6438	10.6089	10.635	9.93273	10.3776
sp|Q8R5H1-2|UBP15_MOUSE	Usp15	UBP15_MOUSE Isoform 2 of Ubiquitin carboxyl-terminal hydrolase 15	18	2292.25	2568.35	2234.77	2725.54	1950.45	1976.57	2402.95	2273.29	2261.22	11.5917	11.6816	10.9866	11.6059	10.75	10.5998	11.1479	10.6189	11.0177
sp|Q80TL7|MON2_MOUSE	Mon2	MON2_MOUSE Protein MON2 homolog	18	2439.11	2888.53	2765.19	3125.97	2490.16	2308.63	2647.61	2853.65	2608.59	10.5597	11.2476	11.6384	11.3958	11.7499	10.5993	10.5157	11.412	10.8815
tr|E9Q3Y4|E9Q3Y4_MOUSE	Lrba	E9Q3Y4_MOUSE Lipopolysaccharide-responsive and beige-like anchor protein	18	1940.87	2260.61	2214.98	2474.14	1992.82	1838.67	2018.84	2411.37	2103.95	10.5257	11.0266	11.678	11.2984	11.779	10.5744	10.0442	12.0798	10.9939
sp|P22682|CBL_MOUSE	Cbl	CBL_MOUSE E3 ubiquitin-protein ligase CBL	18	1492.74	1733.07	1624.86	1802.84	1444.45	1392.39	1732.17	1686.06	1692.7	10.6795	11.1518	11.3013	10.8608	11.263	10.564	11.3689	11.1424	11.6683
sp|Q9Z0H4|CELF2_MOUSE	Celf2	CELF2_MOUSE CUGBP Elav-like family member 2	18	1235.39	1328.38	1305.81	1578.12	1143.87	1118.02	1306.74	1392.97	1335.65	10.9976	10.636	11.3011	11.8297	11.0983	10.5546	10.6719	11.4545	11.4564
sp|Q02819|NUCB1_MOUSE	Nucb1	NUCB1_MOUSE Nucleobindin-1	18	2109.39	2235.79	2358.96	2575.64	2415.52	2118.14	2872.65	2713.53	2856.13	9.87762	9.41646	10.739	10.1559	12.328	10.5184	12.3407	11.7374	12.8865
sp|Q8R1A4|DOCK7_MOUSE	Dock7	DOCK7_MOUSE Dedicator of cytokinesis protein 7	18	1835.82	2083.95	2077.51	2222.91	1767.18	1708.38	2172.96	2174.51	1973.18	10.6469	10.8703	11.7134	10.8556	11.1702	10.507	11.5613	11.6492	11.0261
tr|Q6A099|Q6A099_MOUSE	Gbf1	Q6A099_MOUSE MKIAA0248 protein (Fragment)	18	2323.76	2536.43	2537.49	2780.6	2200.76	2132.53	2755.24	2677.45	2550.99	10.792	10.5948	11.4567	10.874	11.1396	10.5028	11.739	11.4861	11.4151
sp|Q5FWK3|RHG01_MOUSE	Arhgap1	RHG01_MOUSE Rho GTPase-activating protein 1	18	2805.92	3196.36	2830.23	3325.95	2524.59	2409.08	2924.45	2815.78	2641.62	11.5146	11.7975	11.2912	11.4929	11.2915	10.4839	11.0098	10.6737	10.4449
sp|Q99MN1|SYK_MOUSE	Kars	SYK_MOUSE Lysine--tRNA ligase	18	3074.63	3297.03	3182.08	3723.61	2680.66	2705.77	3531.07	3266.24	3233.78	11.208	10.8098	11.277	11.4298	10.6504	10.4599	11.8087	10.9983	11.3581
sp|Q9JIF7|COPB_MOUSE	Copb1	COPB_MOUSE Coatomer subunit beta	18	1882.14	2042.58	1895.79	2150.42	1844.42	1655.4	2065.9	2183.42	1868.9	11.1688	10.9018	10.9369	10.7453	11.929	10.4174	11.2467	11.9684	10.6857
tr|B2RQ80|B2RQ80_MOUSE	Tnik	B2RQ80_MOUSE Tnik protein	18	2753.21	2951.08	2843.86	3087.59	2461.76	2414.09	3147.41	3077.75	2945.75	11.1992	10.7967	11.2461	10.5756	10.9139	10.4136	11.7452	11.5644	11.5453
sp|Q6ZQ58|LARP1_MOUSE	Larp1	LARP1_MOUSE La-related protein 1	18	1884.01	2070.37	2231.85	2338.24	1763.57	1756.85	2344.36	2275.29	2088.83	10.5046	10.3826	12.0978	10.978	10.7171	10.388	11.9917	11.7185	11.2217
sp|Q3UHD1|BAI1_MOUSE	Bai1	BAI1_MOUSE Brain-specific angiogenesis inhibitor 1	18	2200	2399.66	2389.8	2625.78	2012.77	1900.03	2381.46	2318.08	2179.75	11.2661	11.0526	11.8976	11.3227	11.234	10.3184	11.1881	10.9653	10.7552
sp|Q6PGL7|FAM21_MOUSE	Fam21	FAM21_MOUSE WASH complex subunit FAM21	18	2243.72	2477.89	2561.44	2767.3	2149.64	2072.3	2778.47	2660.55	2585.83	10.5184	10.4478	11.6738	10.9239	10.9833	10.3023	11.9495	11.5211	11.68
sp|Q8R0A7|K0513_MOUSE	Kiaa0513	K0513_MOUSE Uncharacterized protein KIAA0513	18	2433.7	2858.34	2583.31	3062	2346.51	2198.7	2969.43	2650.76	2683.08	10.7016	11.3047	11.0435	11.3378	11.2458	10.2529	11.9789	10.767	11.3678
sp|Q91YQ5|RPN1_MOUSE	Rpn1	RPN1_MOUSE Dolichyl-diphosphooligosaccharide--protein glycosyltransferase subunit 1	18	2220.16	2394.5	2281.36	2595.99	2075.72	1902.9	2471.35	2384.31	2300.03	11.2449	10.908	11.2334	11.0717	11.4584	10.2208	11.4833	11.1551	11.2245
sp|P63325|RS10_MOUSE	Rps10	RS10_MOUSE 40S ribosomal protein S10	18	4063.67	4243.92	3982.53	4729.71	3650.04	3375.08	4555.09	4299.32	3832.31	11.5658	10.8639	11.0195	11.3352	11.3225	10.1869	11.8937	11.3031	10.5094
tr|A2AT37|A2AT37_MOUSE	Upf2	A2AT37_MOUSE Protein Upf2	18	2210.87	2602.42	2690.41	2944.19	2315.24	2144.6	2714.04	3001.42	2782.77	9.87545	10.4552	11.6831	11.0739	11.2714	10.1587	11.1217	12.384	11.9766
sp|Q6ZPJ0|TEX2_MOUSE	Tex2	TEX2_MOUSE Testis-expressed sequence 2 protein	18	2578.12	2766.37	2688.38	2910.22	2375.26	2184.33	2980.39	2774.89	2584.78	11.2959	10.9015	11.4513	10.737	11.3427	10.1493	11.9798	11.2306	10.9119
sp|Q9QZQ8|H2AY_MOUSE	H2afy	H2AY_MOUSE Core histone macro-H2A.1	18	2127.45	2494.23	2499.6	2832.53	2068.41	2032.62	2696.96	2867.49	2653.66	9.99942	10.5442	11.4217	11.2106	10.5959	10.1315	11.6292	12.4497	12.0177
sp|Q810A7|DDX42_MOUSE	Ddx42	DDX42_MOUSE ATP-dependent RNA helicase DDX42	18	2060.57	2201.02	2452.32	2587	1981.08	1891.84	2512.01	2719.33	2493.87	10.3093	9.90439	11.928	10.8988	10.8027	10.0375	11.5299	12.5674	12.022
sp|Q9Z1F9|SAE2_MOUSE	Uba2	SAE2_MOUSE SUMO-activating enzyme subunit 2	18	3533.96	3595.43	3553.11	4134.08	2905.37	2925.67	3993.43	4098.26	3650.02	11.4226	10.4523	11.165	11.2518	10.2351	10.0283	11.8416	12.2361	11.3673
sp|P13645|K1C10_HUMAN_contaminant	KRT10	K1C10_HUMAN_contaminant Keratin, type I cytoskeletal 10	18	2638.37	2165.71	1629.62	3282.56	3627.39	1775.2	1337.75	1267.93	1801.78	13.9558	10.3034	8.38015	14.6208	20.9122	9.95787	6.49165	6.1952	9.18295
tr|E9PWT1|E9PWT1_MOUSE	Trrap	E9PWT1_MOUSE Transformation/transcription domain-associated protein	18	1809.45	2053.4	2227.52	2220.6	1848.93	1667.38	2108.8	2532.16	2210.48	10.1208	10.33	12.1125	10.4587	11.2713	9.89013	10.8209	13.0828	11.9128
sp|Q91WJ8|FUBP1_MOUSE	Fubp1	FUBP1_MOUSE Far upstream element-binding protein 1	18	2611.01	2735.3	2464.22	2939.33	2295.64	2036.43	2863.99	2855.49	2575.07	11.6825	11.0076	10.719	11.0743	11.1948	9.66266	11.756	11.8018	11.1014
sp|Q8VCM7|FIBG_MOUSE	Fgg	FIBG_MOUSE Fibrinogen gamma chain	18	1200.95	1484.35	1015.51	1295.05	828.815	1825.32	1721.72	3862.28	8032.44	5.90455	6.56386	4.85392	5.36152	4.44126	9.51702	7.76579	17.5407	38.0514
sp|Q04750|TOP1_MOUSE	Top1	TOP1_MOUSE DNA topoisomerase 1	18	3206.06	3630.28	3888.38	3956.91	3466.36	2839.76	4403.97	4961.74	4258.15	9.68624	9.86472	11.4209	10.0665	11.4142	9.09841	12.2064	13.8471	12.3956
sp|Q3UH93|PLXD1_MOUSE	Plxnd1	PLXD1_MOUSE Plexin-D1	17	1331	1548.38	1417.93	1617.47	1187.31	1942.85	1532.72	1405.11	1406.23	10.3359	10.8145	10.7046	10.5766	10.0489	15.9996	10.9192	10.0791	10.5217
sp|P08228|SODC_MOUSE	Sod1	SODC_MOUSE Superoxide dismutase [Cu-Zn]	17	4174.78	3538.55	2799.91	3859.83	2916.07	3487.84	2843.58	2378.19	2441.17	15.2563	11.6306	9.94735	11.8775	11.6145	13.5168	9.53331	8.02794	8.59561
sp|Q8BYA0|TBCD_MOUSE	Tbcd	TBCD_MOUSE Tubulin-specific chaperone D	17	2043.51	1724.47	2118.05	1826.16	1993.87	2056.17	1746.6	2348.98	1582.15	12.1337	9.20945	12.2264	9.13051	12.9033	12.9472	9.51418	12.8836	9.05162
sp|P97384|ANX11_MOUSE	Anxa11	ANX11_MOUSE Annexin A11	17	2416.18	2085.82	2190.71	2170.38	2194.44	2264.26	2208.84	2546.81	2055.13	12.4535	9.66944	10.9773	9.41973	12.3275	12.3763	10.4445	12.1255	10.2062
sp|Q9QXK3|COPG2_MOUSE	Copg2	COPG2_MOUSE Coatomer subunit gamma-2	17	2212.9	1898.69	2310.61	2094.43	2124.81	2162.77	1968.61	2597.96	1931.38	11.893	9.17796	12.0727	9.47843	12.4462	12.3265	9.70626	12.8975	10.0014
sp|Q91VN4|CHCH6_MOUSE	Chchd6	CHCH6_MOUSE Coiled-coil-helix-coiled-coil-helix domain-containing protein 6, mitochondrial	17	2281.51	2531.93	2640.86	2986.49	1796.37	2437	2866.52	2277.94	2639.62	10.6312	10.6114	11.9633	11.7182	9.12313	12.0425	12.254	9.80492	11.8512
tr|E9Q3B9|E9Q3B9_MOUSE	Mgll	E9Q3B9_MOUSE Monoglyceride lipase	17	3091.14	3402.14	3073.94	3573.05	2817.6	3037.29	2993.63	3079.59	2986.89	11.4874	11.3714	11.1056	11.181	11.4122	11.9698	10.2061	10.5715	10.695
sp|Q9JHK4|PGTA_MOUSE	Rabggta	PGTA_MOUSE Geranylgeranyl transferase type-2 subunit alpha	17	2505.1	2925.32	2472.73	2942.15	2302.2	2478.39	2390.83	2556.14	2362.01	11.3944	11.9674	10.9343	11.2686	11.4129	11.9546	9.97645	10.7397	10.3516
sp|Q8CCT4|TCAL5_MOUSE	Tceal5	TCAL5_MOUSE Transcription elongation factor A protein-like 5	17	3104.51	3404.39	4221.5	3924.63	2808.96	3913.94	5043.94	4938.74	5043.21	8.91179	8.78966	11.7811	9.48658	8.78829	11.9148	13.2832	13.0957	13.9489
sp|P62827|RAN_MOUSE	Ran	RAN_MOUSE GTP-binding nuclear protein Ran	17	3011.29	3041.17	2775.82	3208.26	2945.28	2855.31	2672.02	3207.09	2764.05	11.8267	10.7427	10.5986	10.6101	12.6074	11.8923	9.62748	11.6349	10.4597
sp|Q8VDQ8|SIR2_MOUSE	Sirt2	SIR2_MOUSE NAD-dependent protein deacetylase sirtuin-2	17	2901.39	2972.54	2688.21	3619.91	2445.93	2758.79	2772.05	2808.69	2797.45	11.7651	10.8413	10.5974	12.3603	10.8099	11.8634	10.3122	10.5205	10.9299
sp|Q91W43|GCSP_MOUSE	Gldc	GCSP_MOUSE Glycine dehydrogenase (decarboxylating), mitochondrial	17	1779.56	2035.94	1880.55	2222.64	1596.84	1855.78	2009.45	2024.65	1942.39	10.7176	11.0283	11.0107	11.2718	10.4817	11.8525	11.1025	11.2635	11.2715
sp|Q8BHG1|NRDC_MOUSE	Nrd1	NRDC_MOUSE Nardilysin	17	1893.78	1910.67	2002.33	2039.59	1752.23	1851.72	1893.32	2169.55	1759.89	11.4176	10.3608	11.7362	10.3545	11.5139	11.8392	10.472	12.0825	10.2233
sp|P21107-2|TPM3_MOUSE	Tpm3	TPM3_MOUSE Isoform 2 of Tropomyosin alpha-3 chain	17	1491.34	1644.35	1419.71	1642.44	1315.44	1367.76	1395.57	1326.98	1292.53	12.0569	11.9568	11.1585	11.1812	11.5909	11.7266	10.3508	9.90981	10.0684
sp|Q9CQM9|GLRX3_MOUSE	Glrx3	GLRX3_MOUSE Glutaredoxin-3	17	3154.88	3494.65	3093.71	3788.22	2564.8	2975.62	3121.76	2942.06	3017.28	11.7128	11.6693	11.1662	11.8428	10.3781	11.7154	10.6326	10.0895	10.7933
tr|E9PXE2|E9PXE2_MOUSE	Mcf2l	E9PXE2_MOUSE Guanine nucleotide exchange factor DBS	17	1348.58	1563.31	1547.25	1736.91	1262.14	1403.95	1501.02	1499.34	1455.45	10.5769	11.0278	11.7974	11.4709	10.7889	11.677	10.8001	10.8623	10.9987
sp|Q00612|G6PD1_MOUSE	G6pdx	G6PD1_MOUSE Glucose-6-phosphate 1-dehydrogenase X	17	2187.12	2403.14	2120.94	2531.79	1934.54	2107.83	2278.71	2215.96	2199.76	11.4251	11.2909	10.7712	11.1367	11.0142	11.6768	10.9204	10.6928	11.072
sp|Q9QUM9|PSA6_MOUSE	Psma6	PSA6_MOUSE Proteasome subunit alpha type-6	17	2090.6	2401.96	1902.58	2549.71	1966.45	1992.37	1871.89	2129.39	1991.52	11.5459	11.9312	10.2152	11.8574	11.8366	11.6689	9.48417	10.8631	10.5975
sp|Q6IRU5-2|CLCB_MOUSE	Cltb	CLCB_MOUSE Isoform 2 of Clathrin light chain B	17	2188.33	2963.86	2725.87	2512.06	2584.21	2986.09	3750.89	3956.38	4622.6	8.05948	9.81777	9.75991	7.79047	10.3731	11.6626	12.6733	13.4596	16.4037
sp|O54865|GCYB1_MOUSE	Gucy1b3	GCYB1_MOUSE Guanylate cyclase soluble subunit beta-1	17	2341.43	2715.15	2391.41	2804.92	2005.83	2296.72	2477.52	2483.79	2415.68	11.1567	11.6361	11.0778	11.2542	10.4168	11.6055	10.8301	10.9322	11.0906
tr|Q5PPR2|Q5PPR2_MOUSE	Exoc1	Q5PPR2_MOUSE Exocyst complex component 1	17	2203.9	2436.75	2452.75	2720.9	1878.12	2160.02	2346.08	2237.9	2231.58	11.1429	11.081	12.0561	11.584	10.3494	11.5815	10.8821	10.4517	10.8713
sp|Q9D2V7|CORO7_MOUSE	Coro7	CORO7_MOUSE Coronin-7	17	2543.02	2751.77	2422.47	2779.6	2192.7	2346.05	2446.8	2455.26	2533.63	11.8031	11.4874	10.9308	10.8635	11.0921	11.5474	10.4185	10.5265	11.3306
sp|Q5DTY9|KCD16_MOUSE	Kctd16	KCD16_MOUSE BTB/POZ domain-containing protein KCTD16	17	2343.44	2713.81	2375.22	2895.74	2194.95	2276.85	2393.01	2388.14	2399.99	11.1315	11.5942	10.9685	11.5824	11.3634	11.4692	10.4281	10.4785	10.9842
tr|F6VQZ6|F6VQZ6_MOUSE	Shisa6	F6VQZ6_MOUSE Protein shisa-6 homolog (Fragment)	17	2186.87	2318.11	2336.36	2650.39	1944.35	2147.64	2533.78	2341.53	2308.84	10.9983	10.4857	11.4233	11.2241	10.6577	11.4542	11.6905	10.8779	11.1882
sp|Q8BQZ4|RLGPB_MOUSE	Ralgapb	RLGPB_MOUSE Ral GTPase-activating protein subunit beta	17	1825.27	1941.34	2072.22	2217.45	1504.8	1750.15	1980.98	1863.44	1789.08	11.259	10.7705	12.4267	11.5177	10.1167	11.4485	11.2102	10.6177	10.6332
sp|Q91VE0|S27A4_MOUSE	Slc27a4	S27A4_MOUSE Long-chain fatty acid transport protein 4	17	1927.56	2201.71	2078.86	2349.93	1828.27	1958.73	2195.12	2211.69	2210	10.6122	10.9023	11.1268	10.8941	10.9705	11.436	11.0871	11.2477	11.7234
sp|Q9QWY8|ASAP1_MOUSE	Asap1	ASAP1_MOUSE Arf-GAP with SH3 domain, ANK repeat and PH domain-containing protein 1	17	2208.22	2446.22	2414.03	2586.95	1990.92	2222.05	2559.92	2532.03	2557.95	10.7133	10.6742	11.386	10.5684	10.5274	11.4323	11.3938	11.3472	11.9573
sp|Q99J08|S14L2_MOUSE	Sec14l2	S14L2_MOUSE SEC14-like protein 2	17	2013.03	2311.64	1978.72	2446.44	1833.5	1922.97	2075.66	2121.75	1975.36	11.258	11.6277	10.7583	11.5209	11.1758	11.4047	10.6495	10.9609	10.6443
sp|Q61792|LASP1_MOUSE	Lasp1	LASP1_MOUSE LIM and SH3 domain protein 1	17	3254.9	3725.23	3204.84	3931.68	2811.15	3054.19	3210.46	3165.08	3317.84	11.4608	11.7975	10.9706	11.6572	10.7882	11.4044	10.3706	10.2944	11.2563
sp|Q3UDE2|TTL12_MOUSE	Ttll12	TTL12_MOUSE Tubulin--tyrosine ligase-like protein 12	17	1356.69	1523.57	1471.76	1640.86	1251.23	1341.8	1473.48	1515.07	1497	10.8363	10.9452	11.4284	11.036	10.8924	11.3655	10.7971	11.1783	11.5208
sp|Q8CCN5|BCAS3_MOUSE	Bcas3	BCAS3_MOUSE Breast carcinoma-amplified sequence 3 homolog	17	1611.69	1936.64	1837.2	2132.83	1620.57	1638.41	1657.17	1855.62	1753.02	10.4909	11.3381	11.6261	11.6903	11.497	11.3098	9.89597	11.1573	10.9946
sp|O35350|CAN1_MOUSE	Capn1	CAN1_MOUSE Calpain-1 catalytic subunit	17	1554.97	1675.01	1494.05	1739.53	1338.39	1409.64	1577.19	1516.38	1502.2	11.7557	11.3895	10.9809	11.0738	11.028	11.3014	10.9388	10.5895	10.9425
sp|Q9JII6|AK1A1_MOUSE	Akr1a1	AK1A1_MOUSE Alcohol dehydrogenase [NADP(+)]	17	2460.77	2657.58	2274.79	2846.56	2012.83	2186.05	2486.3	2363.07	2200.7	11.9712	11.6283	10.7586	11.6608	10.6724	11.2779	11.0964	10.619	10.3155
tr|A2AEE7|A2AEE7_MOUSE	Celsr2	A2AEE7_MOUSE Cadherin EGF LAG seven-pass G-type receptor 2	17	1170.59	1260.32	1129.05	1359.13	1074.25	1100.17	1221.33	1290.45	1194.7	11.3129	10.955	10.6079	11.0604	11.3152	11.2754	10.8284	11.52	11.1248
sp|Q99PL6|UBXN6_MOUSE	Ubxn6	UBXN6_MOUSE UBX domain-containing protein 6	17	2553.85	2845.44	2697.19	2991.68	2195.75	2410.09	2866.92	2589.97	2552.95	11.2575	11.2813	11.5586	11.1046	10.5491	11.2663	11.5937	10.5459	10.843
sp|Q61081|CDC37_MOUSE	Cdc37	CDC37_MOUSE Hsp90 co-chaperone Cdc37	17	3236.41	3598.66	3001.47	3739.07	2747.48	2900.14	3307.81	3032.95	2996.37	11.8407	11.8418	10.6757	11.5191	10.9556	11.2521	11.1024	10.2499	10.5626
sp|Q505F5|LRC47_MOUSE	Lrrc47	LRC47_MOUSE Leucine-rich repeat-containing protein 47	17	2806.69	2939.22	2870.02	3307.64	2471.84	2632.07	3043.87	3037.26	2839.16	11.297	10.6405	11.2305	11.2105	10.8436	11.2348	11.2397	11.2925	11.0108
sp|B1AZP2-2|DLGP4_MOUSE	Dlgap4	DLGP4_MOUSE Isoform 2 of Disks large-associated protein 4	17	2455.02	2801.15	2558.49	2895.66	2143.54	2338.67	2843.12	2501.25	2537.24	11.1188	11.4104	11.2651	11.0431	10.5809	11.2324	11.813	10.4641	11.072
sp|P08414|KCC4_MOUSE	Camk4	KCC4_MOUSE Calcium/calmodulin-dependent protein kinase type IV	17	3642.67	4047	3609.4	4161.77	3329.93	3355.47	3917.84	3639.26	3438.87	11.4719	11.4633	11.0509	11.0365	11.4297	11.2065	11.3194	10.5869	10.435
sp|Q05512|MARK2_MOUSE	Mark2	MARK2_MOUSE Serine/threonine-protein kinase MARK2	17	1559.6	1731.97	1713.45	1850.88	1432.5	1537.84	1850.93	1779.31	1770.12	10.6961	10.6835	11.4243	10.6888	10.7077	11.1847	11.6457	11.2721	11.6971
sp|Q80XQ2|TBCD5_MOUSE	Tbc1d5	TBCD5_MOUSE TBC1 domain family member 5	17	1856	2022.39	1827.94	2128.27	1782.27	1776.24	2090.46	2143.86	1962.53	11.0087	10.7891	10.5406	10.6298	11.5217	11.1727	11.3753	11.7461	11.2159
sp|Q9JKK7|TMOD2_MOUSE	Tmod2	TMOD2_MOUSE Tropomodulin-2	17	2477.54	2765.39	2313.01	2788	2346.03	2230.12	2534.03	2445.52	2240.61	11.6724	11.7181	10.5941	11.0604	12.0465	11.1421	10.9525	10.6427	10.1711
sp|Q9DBL1|ACDSB_MOUSE	Acadsb	ACDSB_MOUSE Short/branched chain specific acyl-CoA dehydrogenase, mitochondrial	17	2269.26	2676.54	2177.76	2679.22	2122.61	2105.69	2236.35	2419.65	2243.16	11.3212	12.01	10.5625	11.2553	11.5416	11.1405	10.2355	11.1507	10.7828
sp|Q06335|APLP2_MOUSE	Aplp2	APLP2_MOUSE Amyloid-like protein 2	17	3113.06	3425.43	3203.66	3583.71	2710.24	2915.08	3564.76	3344.63	3140.9	11.2152	11.0993	11.2205	10.8715	10.6418	11.137	11.7818	11.1303	10.9027
tr|Q6XE40|Q6XE40_MOUSE	Mpp3	Q6XE40_MOUSE MAGUK p55 subfamily member 3	17	3079.76	3469.97	2905.23	3521.79	2745.56	2756.42	3031.88	2967.13	2969.83	11.7146	11.8713	10.7433	11.2801	11.3823	11.1188	10.58	10.4253	10.8844
tr|A2AB60|A2AB60_MOUSE	Fmnl1	A2AB60_MOUSE Formin-like 1, isoform CRA_c	17	2107.02	2396.45	2380.75	2562.6	2001.87	2077.44	2390.11	2421.83	2355.36	10.6313	10.8755	11.6783	10.8878	11.0089	11.116	11.0637	11.2877	11.4509
sp|Q9EP69|SAC1_MOUSE	Sacm1l	SAC1_MOUSE Phosphatidylinositide phosphatase SAC1	17	2778.66	3058.79	2759.17	3259.96	2477.93	2548.19	2920.79	2862.24	2739.92	11.4237	11.3105	11.028	11.2855	11.1032	11.1097	11.0162	10.8697	10.8535
sp|P51150|RAB7A_MOUSE	Rab7a	RAB7A_MOUSE Ras-related protein Rab-7a	17	2361.93	2688.39	2310	2891.68	2071.54	2182.67	2562.66	2398.67	2331.14	11.3305	11.5994	10.7731	11.6807	10.8308	11.1037	11.278	10.629	10.7748
sp|Q3TLI0|TPC10_MOUSE	Trappc10	TPC10_MOUSE Trafficking protein particle complex subunit 10	17	1992.22	2221.5	2100.79	2371.79	1846.98	1856.17	2069.66	2034.18	2018.77	11.2338	11.2667	11.5165	11.2618	11.3512	11.0996	10.7066	10.5955	10.9683
sp|Q9CPW0|CNTP2_MOUSE	Cntnap2	CNTP2_MOUSE Contactin-associated protein-like 2	17	2342.18	2652.8	2395.44	2749.73	2082.84	2142.26	2402.22	2303.72	2310.63	11.4407	11.6546	11.3753	11.3099	11.0885	11.0969	10.7648	10.3944	10.8748
sp|P62334|PRS10_MOUSE	Psmc6	PRS10_MOUSE 26S protease regulatory subunit 10B	17	2979.47	3297.19	2925.56	3549.07	2656.31	2710.54	3114.5	2977.72	2901.4	11.4813	11.4276	10.9599	11.5161	11.1562	11.0766	11.0103	10.5993	10.7726
sp|A2ASZ8-5|SCMC2_MOUSE	Slc25a25	SCMC2_MOUSE Isoform 5 of Calcium-binding mitochondrial carrier protein SCaMC-2	17	2013.16	2176.45	1983.3	2377.39	1776.67	1801.04	2049.12	1946.71	1897.32	11.6683	11.3459	11.1754	11.603	11.2234	11.0701	10.8958	10.4225	10.5957
tr|A2APX6|A2APX6_MOUSE	Scn1a	A2APX6_MOUSE Protein Scn1a	17	1890.3	2149.37	1963.31	2169.32	1659.7	1770.01	2183.28	2029.06	1917.27	11.1395	11.3922	11.2478	10.7646	10.6598	11.0614	11.8033	11.0451	10.8863
sp|Q8C729-2|F126B_MOUSE	Fam126b	F126B_MOUSE Isoform 2 of Protein FAM126B	17	2845.43	3172.08	2892.71	3352.42	2543.79	2604.5	3008.6	2979.71	2749.69	11.3681	11.3984	11.2355	11.2781	11.0766	11.0348	11.0272	10.9965	10.5848
sp|P16332|MUTA_MOUSE	Mut	MUTA_MOUSE Methylmalonyl-CoA mutase, mitochondrial	17	3216.86	3579.95	3280.32	3872.26	2919.4	2998.35	3596.51	3462.55	3213.72	11.1533	11.1637	11.0569	11.3051	11.0319	11.0243	11.4396	11.0894	10.7359
sp|P47962|RL5_MOUSE	Rpl5	RL5_MOUSE 60S ribosomal protein L5	17	3217.91	3468.62	3316.78	3981.41	2787.93	3059.73	3865.09	3492.28	3636.81	10.9178	10.5847	10.9402	11.3747	10.3093	11.0089	12.0305	10.9449	11.889
sp|A6H5Z3|EXC6B_MOUSE	Exoc6b	EXC6B_MOUSE Exocyst complex component 6B	17	2277.66	2506.55	2266.96	2522.53	2109.5	2072.01	2412.37	2395.29	2305.88	11.386	11.2699	11.0172	10.6184	11.4934	10.9844	11.0634	11.0607	11.1066
sp|P51655|GPC4_MOUSE	Gpc4	GPC4_MOUSE Glypican-4	17	1746.46	2009.12	1922.79	2171.43	1668.92	1687.74	1934.86	2014.57	1869.1	10.7165	11.0882	11.4703	11.2197	11.1614	10.9825	10.892	11.4188	11.0507
sp|Q9CZT8|RAB3B_MOUSE	Rab3b	RAB3B_MOUSE Ras-related protein Rab-3B	17	1868.27	2281.28	2167.7	2536.57	1917.65	1868.38	1941.72	2299.67	1980.03	10.3515	11.3685	11.6765	11.8345	11.5803	10.9782	9.86991	11.7699	10.5706
sp|Q9Z0X1|AIFM1_MOUSE	Aifm1	AIFM1_MOUSE Apoptosis-inducing factor 1, mitochondrial	17	2244.78	2541.55	2296.69	2626.93	2185.37	2105.52	2495.72	2428.08	2336.83	11.0177	11.2196	10.9589	10.8569	11.6904	10.9592	11.2377	11.0084	11.0512
sp|P59325|IF5_MOUSE	Eif5	IF5_MOUSE Eukaryotic translation initiation factor 5	17	3137.49	3454.28	3476.72	3913.95	2731.43	2964.99	3758.18	3195.25	3377.76	10.9338	10.827	11.779	11.4854	10.3745	10.9576	12.0152	10.2858	11.3418
sp|O54833|CSK22_MOUSE	Csnk2a2	CSK22_MOUSE Casein kinase II subunit alpha'	17	3034.62	3582.97	3203.52	3839.61	3049.82	2955.96	3283.32	3481.26	3453.63	10.6035	11.2603	10.8823	11.2972	11.6147	10.9533	10.525	11.2363	11.6274
sp|Q9JHI5|IVD_MOUSE	Ivd	IVD_MOUSE Isovaleryl-CoA dehydrogenase, mitochondrial	17	3747.97	4213.57	3516.18	4443.6	3363.71	3311.37	3603.89	3753.12	3546.69	11.6883	11.8186	10.6604	11.6689	11.433	10.9513	10.3107	10.8116	10.6571
sp|Q3UGC7|EI3JA_MOUSE	Eif3j1	EI3JA_MOUSE Eukaryotic translation initiation factor 3 subunit J-A	17	2443.74	2786.73	2572.29	2966.14	2234.95	2291.51	2715.74	2675.07	2581.03	10.9763	11.2579	11.2322	11.2184	10.9409	10.915	11.1905	11.0988	11.17
sp|Q5U430|UBR3_MOUSE	Ubr3	UBR3_MOUSE E3 ubiquitin-protein ligase UBR3	17	1868.72	2196.09	2053.67	2311.57	1769.69	1778.25	2008.37	2104.72	1996.21	10.7946	11.4097	11.533	11.2437	11.1416	10.8932	10.6431	11.2305	11.1105
sp|Q9EPR5|SORC2_MOUSE	Sorcs2	SORC2_MOUSE VPS10 domain-containing receptor SorCS2	17	2371.89	2770.15	2534.77	2978.15	2235.44	2254.09	2621.13	2662.97	2514.95	10.8059	11.3509	11.2267	11.4249	11.0998	10.8903	10.9551	11.2066	11.0397
sp|P60335|PCBP1_MOUSE	Pcbp1	PCBP1_MOUSE Poly(rC)-binding protein 1	17	1349.14	1531.62	1464.88	1704.99	1325.96	1303.3	1456	1644.55	1483.82	10.6245	10.8484	11.2151	11.3061	11.3807	10.8842	10.519	11.963	11.2589
sp|Q8CI75|DI3L2_MOUSE	Dis3l2	DI3L2_MOUSE DIS3-like exonuclease 2	17	2280.79	2614.77	2584.99	2904.75	2246.63	2212.62	2464.65	2709.04	2508.83	10.5752	10.9043	11.6522	11.341	11.3533	10.8795	10.4838	11.6027	11.2082
sp|Q7TQ95|LNP_MOUSE	Lnp	LNP_MOUSE Protein lunapark	17	1889.04	2125.68	1960.48	2265.38	1724.83	1765.15	2297.07	1995.57	1977.63	10.9685	11.1011	11.0666	11.0761	10.9154	10.869	12.2361	10.7032	11.064
sp|P15209|NTRK2_MOUSE	Ntrk2	NTRK2_MOUSE BDNF/NT-3 growth factors receptor	17	2171.45	2576.34	2284	2727.89	2082.41	2025.43	2293.25	2342.48	2188.74	10.9668	11.7029	11.2143	11.601	11.4626	10.8479	10.6253	10.9282	10.6509
sp|Q99JP6|HOME3_MOUSE	Homer3	HOME3_MOUSE Homer protein homolog 3	17	2855.67	2872.24	2437.46	3125.64	2263.49	2346.63	3083.43	2494.81	2520.63	12.4386	11.2524	10.3216	11.4642	10.7456	10.8395	12.3214	10.0379	10.5788
sp|Q9Z1R2|BAG6_MOUSE	Bag6	BAG6_MOUSE Large proline-rich protein BAG6	17	2199.67	2241.67	2247.3	2474.86	1929.42	2009.48	2519.22	2500.75	2413.33	11.1858	10.2528	11.11	10.5974	10.6935	10.8366	11.7526	11.7468	11.8246
sp|Q8BPM0|DAAM1_MOUSE	Daam1	DAAM1_MOUSE Disheveled-associated activator of morphogenesis 1	17	2817.94	3141.51	3073.07	3340.52	2609.16	2664.14	3424.46	3026.52	3152.88	10.8016	10.8307	11.4519	10.7823	10.9005	10.8297	12.0424	10.7162	11.6447
sp|P57722|PCBP3_MOUSE	Pcbp3	PCBP3_MOUSE Poly(rC)-binding protein 3	17	1603.21	1951.81	1764.94	2066.7	1573.4	1584.96	1772.23	2265.46	1722.76	10.2843	11.2612	11.0068	11.1635	11.0005	10.7821	10.4296	13.424	10.6481
sp|Q9DC70|NDUS7_MOUSE	Ndufs7	NDUS7_MOUSE NADH dehydrogenase [ubiquinone] iron-sulfur protein 7, mitochondrial	17	2034.57	2112.16	2083.11	2429.29	1744.53	1804.31	2141.1	2114.59	2142.02	11.4294	10.6718	11.3765	11.4913	10.6811	10.7488	11.0344	10.9728	11.594
sp|Q60972|RBBP4_MOUSE	Rbbp4	RBBP4_MOUSE Histone-binding protein RBBP4	17	3680.79	3860.39	3210.43	3970.07	3070.31	3039.81	3551.39	3602.22	3424.31	12.24	11.546	10.3788	11.1167	11.1278	10.7198	10.8342	11.065	10.9717
sp|P15864|H12_MOUSE	Hist1h1c	H12_MOUSE Histone H1.2	17	2597.88	3409.03	3139.19	3278.83	2560.29	2796.73	3598.54	4295.72	3364.9	9.36353	11.0513	10.9998	9.95128	10.0577	10.6898	11.8989	14.302	11.6857
sp|Q3UEB3-2|PUF60_MOUSE	Puf60	PUF60_MOUSE Isoform 2 of Poly(U)-binding-splicing factor PUF60	17	1909.51	2047.89	1965.33	2272.28	1786.07	1715.2	2110.96	2112.36	1911.84	11.1857	10.7897	11.1924	11.2084	11.4032	10.6551	11.3445	11.4301	10.7908
sp|Q99P88|NU155_MOUSE	Nup155	NU155_MOUSE Nuclear pore complex protein Nup155	17	2311.12	2431.87	2421.24	2645.34	2160.28	2145.61	2702.94	2927.71	2563.74	10.8179	10.2381	11.018	10.4265	11.0209	10.6505	11.6069	12.6587	11.5626
sp|Q8JZQ9|EIF3B_MOUSE	Eif3b	EIF3B_MOUSE Eukaryotic translation initiation factor 3 subunit B	17	2370.81	2609.25	2292.37	2842.77	2244.82	2089.81	2434.16	2472.12	2399.49	11.3809	11.2657	10.6982	11.4911	11.7449	10.6387	10.7199	10.962	11.0984
sp|Q922H2|PDK3_MOUSE	Pdk3	PDK3_MOUSE [Pyruvate dehydrogenase (acetyl-transferring)] kinase isozyme 3, mitochondrial	17	3560	3988.51	3712.3	4302.17	3203.41	3168.16	3939.87	3714.58	3494.31	11.2506	11.337	11.4055	11.4486	11.0338	10.6178	11.4227	10.8437	10.6402
sp|Q8R2R9|AP3M2_MOUSE	Ap3m2	AP3M2_MOUSE AP-3 complex subunit mu-2	17	2632.86	2925.68	2665.29	3102.85	2334.99	2298.63	2821.92	2674.77	2575.27	11.4514	11.4451	11.2699	11.364	11.0688	10.6023	11.2599	10.7463	10.7923
sp|Q7TT37|ELP1_MOUSE	Ikbkap	ELP1_MOUSE Elongator complex protein 1	17	2587.04	2817.76	2852.44	3104.41	2331.74	2366.4	2995.78	2961.47	2731.07	10.9274	10.7048	11.7132	11.0416	10.7345	10.5999	11.6087	11.5548	11.115
sp|P63242|IF5A1_MOUSE	Eif5a	IF5A1_MOUSE Eukaryotic translation initiation factor 5A-1	17	2811.09	3286.42	2961.48	3534.07	2782.95	2494.5	2660.09	2830.16	2723.58	11.2537	11.8332	11.5259	11.9134	12.1426	10.5902	9.76961	10.4658	10.5056
sp|Q9R0L6|PCM1_MOUSE	Pcm1	PCM1_MOUSE Pericentriolar material 1 protein	17	2098.09	2354.45	2487.14	2572.03	2027.57	1987.71	2326.77	2651.14	2346.13	10.5108	10.6087	12.1132	10.8499	11.0707	10.56	10.6937	12.2683	11.3247
tr|B2RQ71|B2RQ71_MOUSE	Dip2c	B2RQ71_MOUSE Dip2c protein	17	2835.46	3010.87	2951.64	3156.1	2553.62	2467.99	3186.94	2993.67	2749.64	11.429	10.9153	11.5663	10.7121	11.2183	10.5494	11.7847	11.1462	10.6788
sp|Q8BP47|SYNC_MOUSE	Nars	SYNC_MOUSE Asparagine--tRNA ligase, cytoplasmic	17	2016.16	2332.68	2120.83	2443.1	1975.44	1784.6	2038.68	2080.57	2027.37	11.1857	11.6401	11.4391	11.4135	11.9451	10.4998	10.3765	10.6626	10.8376
sp|Q8CCJ3|UFL1_MOUSE	Ufl1	UFL1_MOUSE E3 UFM1-protein ligase 1	17	2247.32	2597.37	2462.67	2751.69	2279.11	2112.58	2581.24	2800.84	2486.75	10.5161	10.9316	11.2032	10.8425	11.6236	10.4834	11.081	12.1065	11.212
sp|Q9Z204|HNRPC_MOUSE	Hnrnpc	HNRPC_MOUSE Heterogeneous nuclear ribonucleoproteins C1/C2	17	3561.87	3880.41	3836.99	4499.19	3133.26	3320.7	4535.23	4020.68	4428.88	10.5853	10.372	11.0857	11.259	10.1487	10.4654	12.3648	11.0374	12.6818
sp|Q9WVJ2|PSD13_MOUSE	Psmd13	PSD13_MOUSE 26S proteasome non-ATPase regulatory subunit 13	17	3099.05	3529.33	3017.81	3778.86	2858.2	2613.97	3039.9	3011.86	2780.78	11.6827	11.9666	11.06	11.9955	11.7435	10.45	10.5132	10.488	10.1005
sp|Q5XJY5|COPD_MOUSE	Arcn1	COPD_MOUSE Coatomer subunit delta	17	2404.37	2685.41	2668.15	2897.71	2273.22	2225.37	2931.08	2977.47	2722.84	10.5668	10.6148	11.3998	10.7235	10.8886	10.3716	11.8176	12.0873	11.5299
tr|Q5F4S8|Q5F4S8_MOUSE	Trpm3	Q5F4S8_MOUSE Protein Trpm3	17	2263.72	2451.38	2544.46	2872	2274.57	2160.93	3009.35	2922.3	2705.18	10.1979	9.93251	11.1437	10.8946	11.168	10.3235	12.4372	12.1606	11.7421
sp|Q9D0L8|MCES_MOUSE	Rnmt	MCES_MOUSE mRNA cap guanine-N7 methyltransferase	17	2736.96	2982.06	2875.58	3388.45	2377.09	2378.87	3086.34	3060.89	2853.7	11.1304	10.9074	11.3688	11.6034	10.536	10.2592	11.5146	11.4983	11.1819
sp|P70232|CHL1_MOUSE	Chl1	CHL1_MOUSE Neural cell adhesion molecule L1-like protein	17	3144.59	3581.58	3268.11	3646.11	2916.74	2714.68	3358.14	3411.72	3285	11.2032	11.4767	11.3194	10.9383	11.3257	10.2565	10.9759	11.2278	11.2766
sp|P26048|GBRA2_MOUSE	Gabra2	GBRA2_MOUSE Gamma-aminobutyric acid receptor subunit alpha-2	17	2893.57	3277.93	2913.56	3411.8	2941.9	2538.3	3388.33	3049.91	3035.66	11.0038	11.2117	10.7716	10.9253	12.1934	10.2365	11.8211	10.7136	11.1231
tr|E9Q4N7|E9Q4N7_MOUSE	Arid1b	E9Q4N7_MOUSE Protein Arid1b	17	1316.01	1436.04	1554.8	1584.74	1190.84	1194.64	1709.66	1736.71	1588.2	10.3449	10.153	11.882	10.4898	10.2025	9.95875	12.3293	12.6106	12.0291
sp|Q91ZZ3|SYUB_MOUSE	Sncb	SYUB_MOUSE Beta-synuclein	17	2888.11	3295.01	2299.1	3208.33	2733.44	2240.35	3225.35	2895.79	2267.1	12.053	12.368	9.32796	11.2746	12.4331	9.91514	12.3487	11.1632	9.11622
sp|Q8CH18|CCAR1_MOUSE	Ccar1	CCAR1_MOUSE Cell division cycle and apoptosis regulator protein 1	17	2647.31	2767.89	3068.97	3297.52	2425.94	2352.2	3372.13	3361.18	3177.87	10.4654	9.84146	11.7948	10.9768	10.4524	9.86108	12.2297	12.2739	12.1045
sp|Q9EPQ8|TCF20_MOUSE	Tcf20	TCF20_MOUSE Transcription factor 20	17	1335.89	1445.01	1652.62	1722.67	1371.99	1256.8	1731.92	1938.96	1698.2	9.86836	9.60077	11.8684	10.7156	11.0462	9.84557	11.7372	13.2307	12.0872
sp|Q62376|RU17_MOUSE	Snrnp70	RU17_MOUSE U1 small nuclear ribonucleoprotein 70 kDa	17	3007.79	3175.63	3157.82	3549.52	2803.07	2588.61	3765.31	3965.17	3442.12	10.6823	10.144	10.9032	10.6152	10.8502	9.74957	12.2682	13.0083	11.7789
sp|Q80X50-5|UBP2L_MOUSE	Ubap2l	UBP2L_MOUSE Isoform 5 of Ubiquitin-associated protein 2-like	17	2026.5	2085.7	2269.95	2443.23	1825.35	1706.77	2459.84	2342.9	2262.51	10.9146	10.1036	11.8857	11.0807	10.7151	9.7485	12.1543	11.6562	11.7413
tr|E9Q0M9|E9Q0M9_MOUSE	Cald1	E9Q0M9_MOUSE Protein Cald1	16	1497.46	2321.5	1640.79	1728.86	1426.77	1859.23	1782.87	1938.88	1774.89	9.78742	13.6472	10.4259	9.51508	10.1638	12.8868	10.6904	11.7059	11.1775
sp|Q9CZD3|SYG_MOUSE	Gars	SYG_MOUSE Glycine--tRNA ligase	16	2834.27	2673.08	2718.19	2813.58	2461.83	2696.29	2613.03	2706.4	2402.68	12.3203	10.4509	11.487	10.2986	11.6634	12.4293	10.4204	10.8671	10.0632
sp|Q9DCC4|P5CR3_MOUSE	Pycrl	P5CR3_MOUSE Pyrroline-5-carboxylate reductase 3	16	1086.71	1255.08	1126.39	1339.19	1110.9	1205.19	1197.85	1216.52	1187.21	10.5571	10.9664	10.6381	10.955	11.7623	12.4161	10.6756	10.9167	11.1127
sp|P19137|LAMA1_MOUSE	Lama1	LAMA1_MOUSE Laminin subunit alpha-1	16	1450.47	2149.6	1896.81	1822.99	1541.81	1831.65	1630.93	2211.68	2066.39	9.11328	12.1474	11.5861	9.64472	10.5581	12.2042	9.40075	12.836	12.5095
sp|Q9CQW1|YKT6_MOUSE	Ykt6	YKT6_MOUSE Synaptobrevin homolog YKT6	16	1977.84	2146.88	1804.73	2350.97	1738.06	1967.73	2042.59	2064.16	2006.01	11.4079	11.1374	10.1199	11.4183	10.9262	12.036	10.8083	10.9977	11.1483
tr|E9Q6R7|E9Q6R7_MOUSE	Utrn	E9Q6R7_MOUSE Protein Utrn	16	1560.62	1829.11	1676.83	1812.93	1431.74	1704.19	1884.24	2085.81	1910.37	10.2496	10.8046	10.7064	10.026	10.2485	11.8693	11.3529	12.6539	12.0889
sp|Q8K183|PDXK_MOUSE	Pdxk	PDXK_MOUSE Pyridoxal kinase	16	2229.69	2411.93	1994.4	2506.69	1924.37	2095.52	2159.05	2144.63	2159.88	11.853	11.5321	10.3072	11.2208	11.1496	11.8134	10.5295	10.5312	11.0631
sp|Q9ERG2|STRN3_MOUSE	Strn3	STRN3_MOUSE Striatin-3	16	1971.08	2314.14	1983.11	2362.85	1735.94	1956.99	2121.32	1973.1	1997.25	11.18	11.8056	10.9353	11.2853	10.7314	11.7713	11.0383	10.3377	10.9152
sp|Q9Z2C4|MTMR1_MOUSE	Mtmr1	MTMR1_MOUSE Myotubularin-related protein 1	16	2604.29	2860.65	2555.25	2943.12	2176.05	2544.86	2806.65	2752.52	2701.06	11.3576	11.2207	10.8337	10.808	10.3431	11.7696	11.2291	11.0884	11.3499
sp|Q8K009|AL1L2_MOUSE	Aldh1l2	AL1L2_MOUSE Mitochondrial 10-formyltetrahydrofolate dehydrogenase	16	1526.81	1728.55	1731.2	1948.41	1594.72	1659.34	1837.32	1862.71	1748.4	10.183	10.3689	11.2249	10.9423	11.592	11.7361	11.2418	11.4756	11.2355
tr|E9Q0V6|E9Q0V6_MOUSE	Nhsl2	E9Q0V6_MOUSE NHS-like protein 2	16	1984.34	2175.81	2191.92	2458.57	1655.19	2040.89	2319.16	2230.04	2238.55	10.7522	10.6038	11.5465	11.2177	9.77497	11.7274	11.5285	11.1618	11.6872
sp|Q9JJK2|LANC2_MOUSE	Lancl2	LANC2_MOUSE LanC-like protein 2	16	1730.15	2014.26	1700.58	2211.51	1620.75	1697.44	1545.45	1835.05	1688.61	11.2613	11.7918	10.7609	12.1208	11.4976	11.7165	9.22826	11.033	10.59
sp|Q8R164|BPHL_MOUSE	Bphl	BPHL_MOUSE Valacyclovir hydrolase	16	3611.62	4108.58	3300.62	4231	3146.32	3437.38	3540.44	3720.24	3443.25	11.5924	11.8611	10.2994	11.4355	11.0068	11.7004	10.4253	11.0302	10.6488
sp|P35278|RAB5C_MOUSE	Rab5c	RAB5C_MOUSE Ras-related protein Rab-5C	16	3509.26	3746.85	3331.12	4015.29	2952.45	3271.4	3544.9	3390.61	3262.07	11.8105	11.3418	10.8991	11.3791	10.8298	11.6758	10.9451	10.5407	10.5781
sp|Q91V12|BACH_MOUSE	Acot7	BACH_MOUSE Cytosolic acyl coenzyme A thioester hydrolase	16	1748.51	1992.32	1409.16	2023.73	1650.63	1589.16	1484.82	1678.12	1512.78	12.0848	12.3849	9.46844	11.7778	12.4339	11.6477	9.4147	10.7136	10.0742
tr|D3YZ21|D3YZ21_MOUSE	D430041D05Rik	D3YZ21_MOUSE Protein D430041D05Rik	16	1375.59	1623.63	1531.9	1648.94	1312.5	1404.39	1488.82	1523.47	1474.07	10.7242	11.3848	11.6106	10.8249	11.1523	11.6109	10.6483	10.9712	11.0728
sp|P62492|RB11A_MOUSE	Rab11a	RB11A_MOUSE Ras-related protein Rab-11A	16	2279.01	2491.76	2104.72	2547.71	1982.45	2102.37	2258	2238.87	2042.39	11.8641	11.6669	10.652	11.1681	11.2481	11.6064	10.7839	10.7661	10.2445
sp|P05480|SRC_MOUSE	Src	SRC_MOUSE Neuronal proto-oncogene tyrosine-protein kinase Src	16	2546.15	2852.67	2712.73	2992.43	2408.41	2558.75	2829.31	2862.41	2643.4	10.8838	10.9675	11.2732	10.7711	11.2205	11.5991	11.0952	11.3023	10.8873
sp|P35235|PTN11_MOUSE	Ptpn11	PTN11_MOUSE Tyrosine-protein phosphatase non-receptor type 11	16	1901.53	2177.98	2162.02	2374.19	1623.81	1898.5	2003.94	2076.91	1943.35	10.9447	11.275	12.0978	11.5068	10.1864	11.5881	10.5815	11.0423	10.7774
sp|Q8VHQ9|ACO11_MOUSE	Acot11	ACO11_MOUSE Acyl-coenzyme A thioesterase 11	16	1995.87	2225.06	2009.81	2419.63	2059.12	1997.32	2025.52	2177.57	2140.76	10.9164	10.9459	10.6868	11.1439	12.2749	11.585	10.1636	11.0017	11.2818
sp|Q9Z1Z2|STRAP_MOUSE	Strap	STRAP_MOUSE Serine-threonine kinase receptor-associated protein	16	2902.29	2979.93	2478.27	3051.96	2272.12	2511.7	2791.62	2530.68	2503.63	12.6117	11.6466	10.4695	11.1674	10.761	11.5745	11.1288	10.1581	10.4825
sp|Q3U0M1|TPPC9_MOUSE	Trappc9	TPPC9_MOUSE Trafficking protein particle complex subunit 9	16	2074.68	2316.54	2237.75	2475.09	1854.25	2084.09	2398.14	2327.44	2193.28	10.8553	10.9016	11.3828	10.9049	10.5741	11.564	11.5113	11.2489	11.0572
sp|Q8CBY8|DCTN4_MOUSE	Dctn4	DCTN4_MOUSE Dynactin subunit 4	16	1783.73	2139.52	2046.42	2307.25	1781.07	1898.44	1992.96	2130.29	2100.44	10.2426	11.0499	11.4241	11.1562	11.1468	11.5606	10.4989	11.2996	11.6213
sp|P52825|CPT2_MOUSE	Cpt2	CPT2_MOUSE Carnitine O-palmitoyltransferase 2, mitochondrial	16	1847.42	2166.91	2005.44	2225.22	1830.47	1911.5	1951.29	2384.73	2035.08	10.4993	11.0763	11.0803	10.6489	11.3382	11.5204	10.1736	12.5191	11.1439
sp|P62484|ABI2_MOUSE	Abi2	ABI2_MOUSE Abl interactor 2	16	1926.65	2103	1964.67	2276.79	1672.33	1828.26	2086.91	1988.48	1866.69	11.3621	11.1547	11.264	11.3063	10.749	11.4339	11.2907	10.8323	10.607
sp|B2RR83|YTDC2_MOUSE	Ythdc2	YTDC2_MOUSE Probable ATP-dependent RNA helicase YTHDC2	16	1621.79	1748.66	1691.06	1920.24	1614.02	1629.61	1851.92	1913.18	1808.09	10.7041	10.3806	10.8508	10.6721	11.6105	11.4061	11.2134	11.6641	11.4984
sp|Q3ULJ0|GPD1L_MOUSE	Gpd1l	GPD1L_MOUSE Glycerol-3-phosphate dehydrogenase 1-like protein	16	2634.6	3216.84	2667.32	3228.73	2388.49	2524.96	2556.8	2742.75	2605.45	11.2062	12.3065	11.0297	11.5642	11.0727	11.3893	9.97704	10.7763	10.678
sp|Q99KK7|DPP3_MOUSE	Dpp3	DPP3_MOUSE Dipeptidyl peptidase 3	16	2172.25	2424.45	2168.11	2494.59	1801.89	2021.52	2311.38	2144.72	2129.86	11.5406	11.5849	11.1982	11.1599	10.4336	11.3893	11.2655	10.5252	10.9027
sp|Q9JMH6|TRXR1_MOUSE	Txnrd1	TRXR1_MOUSE Thioredoxin reductase 1, cytoplasmic	16	2962.08	3103.37	2711.63	3199.33	2499.32	2601.35	2833.52	2765.68	2665.25	12.1954	11.492	10.8537	11.0917	11.2153	11.358	10.7026	10.5183	10.5731
sp|Q6IR34|GPSM1_MOUSE	Gpsm1	GPSM1_MOUSE G-protein-signaling modulator 1	16	1454.8	1628.12	1478.43	1779.87	1325.82	1383.57	1491.4	1537.8	1418.86	11.2572	11.3312	11.1218	11.5973	11.1815	11.3535	10.5872	10.9918	10.5786
sp|Q8VD75|HIP1_MOUSE	Hip1	HIP1_MOUSE Huntingtin-interacting protein 1	16	1349.52	1552.09	1356.43	1564.39	1295.77	1281.19	1433.46	1368.07	1302.13	11.2593	11.6469	11.0021	10.9905	11.7828	11.3356	10.9718	10.5434	10.4676
sp|Q60634|FLOT2_MOUSE	Flot2	FLOT2_MOUSE Flotillin-2	16	2422.48	2722.46	2577.32	2880.02	2155.55	2364.69	2814.1	2640.53	2543.36	10.9465	11.0646	11.3221	10.9584	10.6159	11.3315	11.6658	11.0216	11.0735
sp|Q921S7|RM37_MOUSE	Mrpl37	RM37_MOUSE 39S ribosomal protein L37, mitochondrial	16	2164.36	2359.68	2287.36	2701.74	1877.85	2054.33	2243.22	2258.98	2169.97	11.2457	11.0274	11.5542	11.8206	10.6342	11.3195	10.6928	10.842	10.8636
sp|Q8QZS1|HIBCH_MOUSE	Hibch	HIBCH_MOUSE 3-hydroxyisobutyryl-CoA hydrolase, mitochondrial	16	2901.54	3175.61	2733.1	3350.99	2417.04	2631.76	3001.37	2782.83	2773.63	11.767	11.5831	10.7756	11.4433	10.6834	11.3184	11.1665	10.4247	10.838
sp|Q8CDA1|SAC2_MOUSE	Inpp5f	SAC2_MOUSE Phosphatidylinositide phosphatase SAC2	16	1647.08	1830.28	1764.2	1978.55	1496.51	1591.78	1774.95	1772.98	1728.14	11.0359	11.0299	11.4918	11.163	10.9285	11.3104	10.9104	10.9733	11.1567
sp|P47934|CACP_MOUSE	Crat	CACP_MOUSE Carnitine O-acetyltransferase	16	2670.06	2953.98	2672.6	3070.66	2425.7	2492.43	2851.28	2733.49	2580.73	11.3983	11.3419	11.0917	11.038	11.2861	11.2834	11.1666	10.779	10.6151
sp|P42669|PURA_MOUSE	Pura	PURA_MOUSE Transcriptional activator protein Pur-alpha	16	4766.78	5093.68	4647	5740.94	3842.6	4266.93	4625.29	4514.95	4467.14	11.878	11.416	11.2574	12.046	10.4359	11.2755	10.5735	10.3923	10.7253
sp|Q06890|CLUS_MOUSE	Clu	CLUS_MOUSE Clusterin	16	2932.2	3073.24	2601.77	3181.95	2513.8	2560.09	2865.14	2725.24	2738.49	12.1445	11.4484	10.4762	11.0974	11.3476	11.2445	10.8866	10.4263	10.9285
tr|E9PV16|E9PV16_MOUSE	Ahcyl2	E9PV16_MOUSE Adenosylhomocysteinase	16	2454.11	2688.17	2521.05	2901.16	2187.23	2280.18	2504.33	2452.13	2490.64	11.3985	11.2298	11.3837	11.3466	11.0723	11.2312	10.6711	10.5206	11.1462
sp|Q9R1P4|PSA1_MOUSE	Psma1	PSA1_MOUSE Proteasome subunit alpha type-1	16	2533.39	2896.29	2542.62	3160.8	2196.58	2394.59	2697.05	2727.97	2549.45	11.182	11.498	10.9106	11.7478	10.567	11.2086	10.9212	11.1224	10.8424
sp|Q9D0M5|DYL2_MOUSE	Dynll2	DYL2_MOUSE Dynein light chain 2, cytoplasmic	16	1476.22	1644.28	1486.09	1742.09	1332.43	1431.05	1765.84	1684	1598.27	10.8929	10.9126	10.6607	10.8244	10.7158	11.1982	11.9538	11.4783	11.3633
sp|Q9D906|ATG7_MOUSE	Atg7	ATG7_MOUSE Ubiquitin-like modifier-activating enzyme ATG7	16	2241.66	2676.63	2473.14	2886.98	2136.5	2198.12	2332.69	2460.46	2379.66	10.7515	11.5465	11.5318	11.6596	11.1684	11.1803	10.2641	10.9008	10.9971
sp|P36916|GNL1_MOUSE	Gnl1	GNL1_MOUSE Guanine nucleotide-binding protein-like 1	16	1820.09	2035.03	2054.94	2315.99	1669.86	1860.28	2274.3	2259.29	2164.9	10.3118	10.3699	11.3185	11.0489	10.3112	11.1769	11.8209	11.8238	11.818
sp|Q80TM9|NISCH_MOUSE	Nisch	NISCH_MOUSE Nischarin	16	2970.15	3426.71	2974.11	3608.55	2951.53	2847.29	3138.88	3270.13	3127.81	10.9468	11.3592	10.6565	11.1991	11.8562	11.1286	10.6132	11.1331	11.1074
sp|Q2NL51|GSK3A_MOUSE	Gsk3a	GSK3A_MOUSE Glycogen synthase kinase-3 alpha	16	1555.75	1922.66	1668.72	2056.95	1552.88	1522.19	1527.18	1712.29	1651.47	10.7145	11.9095	11.1728	11.9287	11.6562	11.1173	9.64902	10.8931	10.9588
sp|Q810J8|ZFYV1_MOUSE	Zfyve1	ZFYV1_MOUSE Zinc finger FYVE domain-containing protein 1	16	2850.45	3343.19	3135.45	3537.25	2733.23	2791.22	3073.05	3239.64	3106.28	10.7048	11.2924	11.4475	11.1859	11.1874	11.1163	10.5875	11.2383	11.24
sp|P61164|ACTZ_MOUSE	Actr1a	ACTZ_MOUSE Alpha-centractin	16	2747.67	3052.68	2780.17	3264.02	2350.36	2502.6	2846.53	2770.69	2640.34	11.5086	11.5	11.3207	11.5119	10.7295	11.116	10.9379	10.7198	10.6556
sp|Q9CZ44|NSF1C_MOUSE	Nsfl1c	NSF1C_MOUSE NSFL1 cofactor p47	16	2118.82	2280.66	1968.72	2330.08	1759.89	1874.41	2256.24	2118.29	1994.93	11.8365	11.4591	10.692	10.9607	10.7152	11.1044	11.5632	10.9309	10.7379
sp|P51432|PLCB3_MOUSE	Plcb3	PLCB3_MOUSE 1-phosphatidylinositol 4,5-bisphosphate phosphodiesterase beta-3	16	1411.94	1684.9	1633.71	1813.75	1419.57	1441.18	1571.05	1836.22	1621.73	10.2178	10.9667	11.4938	11.0524	11.1966	11.0601	10.4302	12.2746	11.3079
sp|Q99PU8|DHX30_MOUSE	Dhx30	DHX30_MOUSE Putative ATP-dependent RNA helicase DHX30	16	2383.42	2738.49	2361.21	3155.21	2480.79	2362.74	2485.35	3005.92	2866.89	10.4411	10.7899	10.056	11.6389	11.8447	10.9764	9.98836	12.1636	12.1009
sp|Q9QYI3|DNJC7_MOUSE	Dnajc7	DNJC7_MOUSE DnaJ homolog subfamily C member 7	16	2460.67	2773.42	2651.17	3140.29	2319.06	2319.67	2599.78	2602.31	2565.34	10.9729	11.1236	11.4935	11.7917	11.2711	10.9697	10.6357	10.7193	11.0224
sp|P97390|VPS45_MOUSE	Vps45	VPS45_MOUSE Vacuolar protein sorting-associated protein 45	16	2372.07	2661.2	2583.92	2938.44	2185.88	2263.61	2653.18	2686.58	2567.39	10.8194	10.9173	11.4578	11.2858	10.8665	10.9491	11.102	11.3192	11.2831
sp|Q6PGF7|EXOC8_MOUSE	Exoc8	EXOC8_MOUSE Exocyst complex component 8	16	2549.79	2908.03	2486.61	3012.56	2392.72	2246.44	2366.54	2448.99	2318.34	11.7088	12.0107	11.101	11.6489	11.9753	10.9397	9.96975	10.3881	10.2577
sp|Q99NH0|ANR17_MOUSE	Ankrd17	ANR17_MOUSE Ankyrin repeat domain-containing protein 17	16	1635.15	1793.23	1953.54	2057.2	1678.21	1686.72	2037.21	2201.46	2031.7	9.99642	9.86016	11.6106	10.5902	11.182	10.9353	11.4257	12.4319	11.9676
sp|P70372|ELAV1_MOUSE	Elavl1	ELAV1_MOUSE ELAV-like protein 1	16	2411.64	2408.76	2242.82	2696.18	1981.46	2079.25	2533.41	2449.43	2277.59	11.9538	10.7386	10.8077	11.2533	10.7045	10.9295	11.5202	11.215	10.8775
sp|P0C0S6|H2AZ_MOUSE	H2afz	H2AZ_MOUSE Histone H2A.Z	16	2094.2	2241.53	1960.34	2483.08	1972.46	1952.51	2394.02	2497.43	2217.94	11.0409	10.629	10.0477	11.0235	11.334	10.9165	11.5792	12.1625	11.2668
sp|Q5U3K5|RABL6_MOUSE	Rabl6	RABL6_MOUSE Rab-like protein 6	16	1984.43	2247.32	2269.03	2428.99	1929.55	1941.93	2369.53	2281.81	2248.65	10.5177	10.713	11.6915	10.8405	11.1462	10.9149	11.5215	11.1713	11.4833
sp|Q9EP53|TSC1_MOUSE	Tsc1	TSC1_MOUSE Hamartin	16	2404.98	2716.69	2528.51	2883.07	2302.45	2230.58	2575.19	2612.59	2390.44	11.0889	11.2662	11.3341	11.1936	11.5705	10.9067	10.893	11.1273	10.6198
sp|Q9Z110|P5CS_MOUSE	Aldh18a1	P5CS_MOUSE Delta-1-pyrroline-5-carboxylate synthase	16	1907.87	2085.71	2005.16	2261.22	1950.66	1799.82	2126.66	2163.39	1953.5	10.8999	10.7174	11.137	10.8782	12.1463	10.9044	11.1464	11.4169	10.7535
sp|Q91WG4|ELP2_MOUSE	Elp2	ELP2_MOUSE Elongator complex protein 2	16	1905.03	2351.56	2004.38	2603.16	1952.01	1839.81	1844.24	2173.26	2027.84	10.6471	11.8208	10.8907	12.2509	11.8904	10.9044	9.45599	11.2197	10.92
sp|Q8CE50|SNX30_MOUSE	Snx30	SNX30_MOUSE Sorting nexin-30	16	1990.47	2200.84	1870.19	2211.62	1769.75	1737.71	2053.12	1990.47	1857.72	11.7541	11.6892	10.7366	10.9973	11.3903	10.8821	11.1227	10.8576	10.5701
sp|Q9WTM5|RUVB2_MOUSE	Ruvbl2	RUVB2_MOUSE RuvB-like 2	16	1557.67	1670.59	1475.51	1770.9	1367.4	1377.59	1670.89	1616.63	1531.77	11.5905	11.1804	10.6737	11.0958	11.0894	10.8704	11.4061	11.1116	10.982
sp|Q9WUM4|COR1C_MOUSE	Coro1c	COR1C_MOUSE Coronin-1C	16	5478.69	6311.5	5442.35	6456.48	4827.29	4912.75	5538.41	5438.31	5696.39	11.4265	11.8394	11.0349	11.3389	10.9731	10.8658	10.597	10.4771	11.4472
sp|Q99N28|CADM3_MOUSE	Cadm3	CADM3_MOUSE Cell adhesion molecule 3	16	3100.75	3460.81	3195.97	3599.05	2617.14	2654.25	3027.37	2745.37	2671.67	11.9693	12.0155	11.9937	11.6985	11.0108	10.8654	10.7209	9.78915	9.93682
sp|Q9DBF1|AL7A1_MOUSE	Aldh7a1	AL7A1_MOUSE Alpha-aminoadipic semialdehyde dehydrogenase	16	2436.7	2958.1	2502.78	3058.5	2366.8	2256.83	2432.04	2564.24	2444.88	11.0587	12.0747	11.0426	11.6883	11.7071	10.8618	10.1259	10.7498	10.6911
sp|Q69ZF3|GBA2_MOUSE	Gba2	GBA2_MOUSE Non-lysosomal glucosylceramidase	16	2048	2500.46	2264.31	2550.06	2161.69	1968.49	2026.86	2331.22	2232.39	10.6373	11.6811	11.4337	11.153	12.2372	10.8427	9.65802	11.1848	11.1721
sp|A2AHC3|CAMP1_MOUSE	Camsap1	CAMP1_MOUSE Calmodulin-regulated spectrin-associated protein 1	16	2847.5	3116.74	3374.61	3587.34	2624.88	2751.24	3365.59	3266.5	3248.96	10.5596	10.3955	12.1661	11.202	10.6091	10.8196	11.45	11.1894	11.6088
sp|Q8BFU3|RN214_MOUSE	Rnf214	RN214_MOUSE RING finger protein 214	16	2691.11	2849.43	2555.31	3062.14	2388.72	2344.14	2804.21	2707.36	2615.09	11.7009	11.1431	10.8014	11.2112	11.3198	10.8087	11.1856	10.8736	10.9556
sp|P54923|ADPRH_MOUSE	Adprh	ADPRH_MOUSE [Protein ADP-ribosylarginine] hydrolase	16	2487.82	2776.87	2380.3	2934.97	2216.63	2168.72	2497.75	2535.22	2281.04	11.6702	11.7159	10.8552	11.5932	11.3328	10.7885	10.749	10.9854	10.3099
sp|Q8CCB4|VPS53_MOUSE	Vps53	VPS53_MOUSE Vacuolar protein sorting-associated protein 53 homolog	16	3069.89	3510.33	3160.42	3615.76	2771.2	2756.82	3221.55	3199.27	3060.19	11.3082	11.63	11.3178	11.2153	11.1257	10.7691	10.8867	10.8859	10.8613
sp|Q99KQ4|NAMPT_MOUSE	Nampt	NAMPT_MOUSE Nicotinamide phosphoribosyltransferase	16	2229.18	2437.31	2247.93	2629.03	1992.08	1965.92	2421.15	2293.64	2104.69	11.4645	11.2741	11.2393	11.3853	11.1661	10.722	11.4233	10.8962	10.4294
sp|O35381|AN32A_MOUSE	Anp32a	AN32A_MOUSE Acidic leucine-rich nuclear phosphoprotein 32 family member A	16	3875.82	4088.88	3922.3	4695.47	3332.66	3477.91	4176.83	4485.25	3935.24	11.2644	10.6884	11.0824	11.4912	10.5566	10.7192	11.1366	12.0413	11.0199
sp|A2APV2|FMNL2_MOUSE	Fmnl2	FMNL2_MOUSE Formin-like protein 2	16	2432.55	2723.45	2589.38	2861.61	2454.71	2291.67	2809.15	2885.94	2622.12	10.7236	10.7984	11.0974	10.6225	11.7941	10.7135	11.361	11.7519	11.1376
sp|Q80TF3|PCD19_MOUSE	Pcdh19	PCD19_MOUSE Protocadherin-19	16	1747.11	2024.11	2008.17	2231.06	1797.58	1669.43	1914.19	2020.41	1869.73	10.5552	10.9987	11.7949	11.3501	11.8365	10.6959	10.6095	11.2753	10.884
sp|Q8C0C7|SYFA_MOUSE	Farsa	SYFA_MOUSE Phenylalanine--tRNA ligase alpha subunit	16	1263.65	1319.34	1380.7	1538.81	1091.19	1178.5	1599.32	1419.3	1449.99	10.7979	10.1398	11.4699	11.0723	10.1625	10.6793	12.5374	11.2028	11.9382
sp|O35239|PTN9_MOUSE	Ptpn9	PTN9_MOUSE Tyrosine-protein phosphatase non-receptor type 9	16	2193.66	2628.09	2294.7	2669.69	2387.52	2035.22	2177.45	2456.35	2271.73	10.8317	11.6716	11.0154	11.1001	12.8488	10.6571	9.86364	11.2036	10.808
tr|E9Q5B0|E9Q5B0_MOUSE	Camsap3	E9Q5B0_MOUSE Calmodulin-regulated spectrin-associated protein 3	16	2320.04	2610.08	2750.51	2889.28	2179.7	2241.6	2952.98	2773.4	2609.51	10.3979	10.5212	11.9842	10.9038	10.6472	10.6539	12.1415	11.4816	11.2686
sp|Q62245|SOS1_MOUSE	Sos1	SOS1_MOUSE Son of sevenless homolog 1	16	1969.5	2211.39	2104.74	2352	1798.23	1815.29	2367.89	2182.98	2136.55	10.8707	10.9781	11.294	10.9315	10.8177	10.6255	11.9901	11.1299	11.3626
sp|Q9DC69|NDUA9_MOUSE	Ndufa9	NDUA9_MOUSE NADH dehydrogenase [ubiquinone] 1 alpha subcomplex subunit 9, mitochondrial	16	2190.77	2487.1	2101.25	2586.89	2093.32	1929.74	2307.77	2252.5	2166.72	11.3734	11.6131	10.6051	11.3086	11.8445	10.6241	10.9912	10.8018	10.8382
sp|Q91ZW3|SMCA5_MOUSE	Smarca5	SMCA5_MOUSE SWI/SNF-related matrix-associated actin-dependent regulator of chromatin subfamily A member 5	16	2459.84	2633.52	2891.66	3081.31	2284.03	2399.65	3106.9	3223.89	2981.58	10.2624	9.88185	11.7283	10.8247	10.3855	10.6167	11.8913	12.424	11.9853
sp|P19253|RL13A_MOUSE	Rpl13a	RL13A_MOUSE 60S ribosomal protein L13a	16	3629.43	3542.25	3905.27	4136.07	3554.31	3372.01	4424.27	4557.16	4024.37	10.7728	9.45654	11.2691	10.3376	11.4983	10.6141	12.0474	12.4947	11.5094
sp|P28665|MUG1_MOUSE	Mug1	MUG1_MOUSE Murinoglobulin-1	16	3514.33	3357.56	2623.39	3234.94	2297.45	2595.61	2942.9	3473.32	3106.17	13.5342	11.6299	9.82201	10.4905	9.64327	10.6006	10.3975	12.356	11.526
sp|Q9JLI8|SART3_MOUSE	Sart3	SART3_MOUSE Squamous cell carcinoma antigen recognized by T-cells 3	16	1472.24	1550.14	1595.98	1781.03	1299.45	1381.16	1820.74	1818.46	1740.27	10.6486	10.0843	11.2225	10.8474	10.2438	10.594	12.0816	12.1496	12.1281
sp|Q8CCJ4|AMER2_MOUSE	Amer2	AMER2_MOUSE APC membrane recruitment protein 2	16	1911.29	2286.66	2233.09	2428.23	1872.6	1886.08	2534.05	2340.16	2342.36	10.0764	10.8428	11.4454	10.7797	10.7599	10.5448	12.2562	11.3963	11.8985
sp|P70392|RGRF2_MOUSE	Rasgrf2	RGRF2_MOUSE Ras-specific guanine nucleotide-releasing factor 2	16	2505.22	2747.62	2735.9	3057.51	2304.85	2281.15	2892.92	2820.13	2665.67	10.9068	10.7589	11.5797	11.2087	10.9365	10.5318	11.5544	11.3412	11.182
sp|Q7TQH0-2|ATX2L_MOUSE	Atxn2l	ATX2L_MOUSE Isoform 2 of Ataxin-2-like protein	16	2244.22	2388.31	2441.17	2618.88	1909.75	2061.87	2865.68	2685.87	2528.39	10.7973	10.3348	11.4181	10.6098	10.0142	10.5199	12.6485	11.9365	11.7208
sp|Q99K46|UBP11_MOUSE	Usp11	UBP11_MOUSE Ubiquitin carboxyl-terminal hydrolase 11	16	2061.36	2322.25	2126.84	2525.86	1866.92	1887.08	2455.51	2423.41	2239.06	10.8326	10.9761	10.8658	11.1771	10.6928	10.5165	11.8381	11.7638	11.3372
sp|P57776-3|EF1D_MOUSE	Eef1d	EF1D_MOUSE Isoform 3 of Elongation factor 1-delta	16	1687.45	1741.31	1579.5	1965.14	1493.65	1429.22	1830.08	1711.97	1669.15	11.6729	10.8339	10.6222	11.4468	11.2612	10.4845	11.614	10.9392	11.1252
sp|Q9DCN2|NB5R3_MOUSE	Cyb5r3	NB5R3_MOUSE NADH-cytochrome b5 reductase 3	16	2297.34	2582.96	2221.64	2730.39	1982.21	1939.03	2389.32	2271.72	2191.25	11.6629	11.7939	10.9648	11.672	10.9677	10.4391	11.128	10.6531	10.7185
sp|Q8VBX6|MPDZ_MOUSE	Mpdz	MPDZ_MOUSE Multiple PDZ domain protein	16	2514.65	2871.93	2541.26	2864.71	2294.59	2153.39	2685.4	2559.74	2485.36	11.4366	11.7477	11.2361	10.9708	11.3739	10.3858	11.2044	10.7536	10.891
sp|P46061|RAGP1_MOUSE	Rangap1	RAGP1_MOUSE Ran GTPase-activating protein 1	16	2293.22	2504.79	2388.63	2780.16	2076.25	1975.87	2389.88	2505.6	2377.17	11.2606	11.0624	11.4028	11.4954	11.1118	10.289	10.766	11.365	11.247
sp|Q9Z1N5|DX39B_MOUSE	Ddx39b	DX39B_MOUSE Spliceosome RNA helicase Ddx39b	16	1319.4	1428.27	1390.8	1590.8	1216.28	1139.07	1444.8	1473	1294.57	11.2168	10.9211	11.4949	11.388	11.2697	10.2694	11.2684	11.5674	10.6043
tr|Q8VHM5|Q8VHM5_MOUSE	Hnrnpr	Q8VHM5_MOUSE Heterogeneous nuclear ribonucleoprotein R	16	3294.2	3435.39	3553.41	3972.5	3043.79	2934.18	3842.54	3992.7	3649.8	10.8567	10.1832	11.3851	11.0243	10.9332	10.2549	11.6178	12.155	11.5898
sp|Q8C167|PPCEL_MOUSE	Prepl	PPCEL_MOUSE Prolyl endopeptidase-like	16	2260.5	2477.01	2251.63	2721.34	2034.04	1906	2447.29	2309.73	2235.98	11.4513	11.286	11.089	11.6084	11.2304	10.2394	11.3736	10.8082	10.9139
sp|Q921F4|HNRLL_MOUSE	Hnrnpll	HNRLL_MOUSE Heterogeneous nuclear ribonucleoprotein L-like	16	3433.71	3619.16	3434.31	3957.16	3249.59	2954.8	3651.11	4055.24	3613.36	11.2169	10.6335	10.9067	10.8851	11.5698	10.2362	10.942	12.2368	11.3732
sp|P12970|RL7A_MOUSE	Rpl7a	RL7A_MOUSE 60S ribosomal protein L7a	16	3737.43	3987.8	3668.19	4434.82	3317.32	3189.32	4313.83	4114.22	3849.5	11.295	10.8394	10.7773	11.2857	10.9266	10.2214	11.9601	11.4852	11.2093
sp|Q8K4R4-2|PITC1_MOUSE	Pitpnc1	PITC1_MOUSE Isoform 2 of Cytoplasmic phosphatidylinositol transfer protein 1	16	2387.12	2630.31	2331.75	2725.67	2292.44	2051.41	2664.66	2673.31	2517.37	11.1922	11.092	10.6284	10.761	11.7146	10.1999	11.4616	11.578	11.3723
sp|P63321|RALA_MOUSE	Rala	RALA_MOUSE Ras-related protein Ral-A	16	1267.52	1494.79	1290.72	1480.63	1276.88	1084.23	1413.77	1258.39	1263.62	11.1854	11.8642	11.0732	11.0023	12.281	10.1465	11.4455	10.2577	10.7442
sp|Q80U93|NU214_MOUSE	Nup214	NU214_MOUSE Nuclear pore complex protein Nup214	16	1833	1961.87	2112.46	2127.63	1717.44	1657.59	2273.19	2309.26	2128.37	10.5699	10.1751	11.8425	10.331	10.7938	10.1364	12.0255	12.3004	11.8254
sp|P70399|TP53B_MOUSE	Tp53bp1	TP53B_MOUSE Tumor suppressor p53-binding protein 1	16	1325.49	1419.58	1527.5	1602.51	1261.85	1170.07	1568.26	1618.97	1453.33	10.7004	10.3073	11.9881	10.8934	11.1024	10.0169	11.6145	12.0726	11.3044
sp|P32067|LA_MOUSE	Ssb	LA_MOUSE Lupus La protein homolog	16	2973.73	3287.41	3302.79	3630.08	2794.51	2683.84	4017.76	3664.35	3564.11	10.3995	10.3402	11.229	10.6898	10.6514	9.95335	12.8901	11.8372	12.0095
tr|Q6P5B5|Q6P5B5_MOUSE	Fxr2	Q6P5B5_MOUSE Fragile X mental retardation syndrome-related protein 2	16	2313.47	2491.19	2413.97	2777.22	2047.85	1957.35	2784.11	2581.2	2493.44	11.0755	10.7268	11.2352	11.1957	10.6853	9.93734	12.2278	11.4147	11.5017
sp|Q03517|SCG2_MOUSE	Scg2	SCG2_MOUSE Secretogranin-2	16	1702.91	2029.92	2019.5	2241.99	1791.07	1628.42	2648.25	2372.52	2336.24	9.49706	10.1821	10.9493	10.5286	10.8867	9.63084	13.5493	12.2222	12.5538
sp|Q8C9B9|DIDO1_MOUSE	Dido1	DIDO1_MOUSE Death-inducer obliterator 1	16	1425.4	1581.59	1926.53	1795.32	1514.9	1371.04	1937	2222.04	2014.99	9.43431	9.41517	12.3964	10.0059	10.9281	9.62329	11.7615	13.5852	12.8501
tr|A2AIX1|A2AIX1_MOUSE	Sec16a	A2AIX1_MOUSE Protein Sec16a	16	970.533	1026.78	1132.78	1185.44	922.109	875.273	1400.57	1363.13	1219.55	10.0617	9.57413	11.417	10.3486	10.4191	9.62287	13.3207	13.0539	12.1821
sp|Q0VE82|CPNE7_MOUSE	Cpne7	CPNE7_MOUSE Copine-7	16	2833.61	3570.46	3744.16	4366.71	3053.68	2534.74	3270.04	2997.52	3011.07	10.1026	11.4493	12.9776	13.1096	11.866	9.58359	10.6957	9.87183	10.3437
sp|O88696|CLPP_MOUSE	Clpp	CLPP_MOUSE ATP-dependent Clp protease proteolytic subunit, mitochondrial	15	1309.75	1385.05	1214.01	1463.66	1227.97	1412.02	1413.8	1316.21	1225.2	11.3918	10.835	10.2653	10.7197	11.6407	13.024	11.2811	10.5747	10.2677
sp|P62889|RL30_MOUSE	Rpl30	RL30_MOUSE 60S ribosomal protein L30	15	2145.41	1886.18	1943.01	2171.59	2099.51	2167.65	1918.92	2314.96	1884.97	12.0114	9.49791	10.5756	10.2377	12.8112	12.8698	9.85603	11.972	10.1683
sp|Q6WVG3|KCD12_MOUSE	Kctd12	KCD12_MOUSE BTB/POZ domain-containing protein KCTD12	15	1627.07	1728.39	1649.05	1931.68	1142.45	1638.3	1648.74	1480.49	1557.54	11.812	11.2855	11.6385	11.8084	9.03942	12.6128	10.9807	9.92803	10.8948
sp|Q9CR61|NDUB7_MOUSE	Ndufb7	NDUB7_MOUSE NADH dehydrogenase [ubiquinone] 1 beta subcomplex subunit 7	15	1368.29	1700.24	1633.25	1991.75	1131.68	1570.64	1491.17	1503.37	1568.83	10.2649	11.4722	11.9117	12.582	9.25307	12.4955	10.2627	10.4179	11.34
tr|Q68FM7|Q68FM7_MOUSE	Arhgef11	Q68FM7_MOUSE Protein Arhgef11	15	1479.68	1631.26	1649.16	1769.04	1384.87	1584.33	1645.67	1581.67	1575.44	10.7864	10.6953	11.6874	10.8589	11.0028	12.2477	11.0056	10.6504	11.0655
sp|Q7TQD2|TPPP_MOUSE	Tppp	TPPP_MOUSE Tubulin polymerization-promoting protein	15	2721.46	3177.12	2766.61	3394.78	2345.05	2816.47	2734.62	2926.44	2865.2	11.0437	11.596	10.9146	11.6002	10.3718	12.1205	10.1806	10.9697	11.2029
sp|Q9DBG7|SRPR_MOUSE	Srpr	SRPR_MOUSE Signal recognition particle receptor subunit alpha	15	1660.9	1439.35	1794.82	1606.15	1614.03	1640.54	1645.29	2013.98	1493.1	11.5661	9.01509	12.1509	9.4182	12.2501	12.1152	10.5111	12.955	10.0183
sp|P58404|STRN4_MOUSE	Strn4	STRN4_MOUSE Striatin-4	15	2746.18	3176.85	3127.38	3523.84	2152.23	2798.15	2910.34	2560.49	2740.95	11.1632	11.6149	12.3591	12.0619	9.53531	12.0623	10.8534	9.61442	10.7355
sp|O88952|LIN7C_MOUSE	Lin7c	LIN7C_MOUSE Protein lin-7 homolog C	15	1517.11	1701.5	1517.84	1859.24	1381.81	1527	1543.28	1557.25	1502.62	11.2244	11.3225	10.9174	11.583	11.1425	11.9808	10.475	10.6426	10.7117
sp|P51863|VA0D1_MOUSE	Atp6v0d1	VA0D1_MOUSE V-type proton ATPase subunit d 1	15	3452.3	3729.5	3528.71	4204.01	2978.58	3450.59	3832.53	3515.91	3406.29	11.2348	10.9161	11.164	11.5202	10.5646	11.9083	11.4421	10.5691	10.6807
sp|Q8C878|UBA3_MOUSE	Uba3	UBA3_MOUSE NEDD8-activating enzyme E1 catalytic subunit	15	1920.91	1977.41	1927.27	1979.23	1995.78	1881.24	1778.09	2397.06	1781.28	11.3183	10.4793	11.0399	9.82	12.8167	11.7549	9.61149	13.0466	10.1128
sp|O70325|GPX41_MOUSE	Gpx4	GPX41_MOUSE Phospholipid hydroperoxide glutathione peroxidase, mitochondrial	15	2974.85	3388.37	2635.67	3592.56	2735.32	2782.72	2562.42	2870.99	2703.05	11.8287	12.1178	10.1885	12.0287	11.8541	11.7339	9.34728	10.545	10.3559
sp|Q80T79|CSMD3_MOUSE	Csmd3	CSMD3_MOUSE CUB and sushi domain-containing protein 3	15	1317.34	1501.37	1443.36	1578.13	1209.34	1324.9	1398.67	1393.08	1341.32	10.9914	11.2669	11.7078	11.0876	10.9974	11.723	10.7061	10.7367	10.7832
sp|Q8VD37-8|SGIP1_MOUSE	Sgip1	SGIP1_MOUSE Isoform 7 of SH3-containing GRB2-like protein 3-interacting protein 1	15	1613.6	1853.3	2011.92	2187.81	1328.77	1684.08	1945	1694.06	1662.94	10.5711	10.9202	12.8139	12.069	9.48767	11.7	11.6897	10.2516	10.4969
sp|Q62159|RHOC_MOUSE	Rhoc	RHOC_MOUSE Rho-related GTP-binding protein RhoC	15	2640.85	3208.69	3024.36	3452.31	2420.45	2771.98	2885.42	2858.2	3070.86	10.4805	11.4532	11.6685	11.5368	10.4694	11.6661	10.5053	10.4778	11.7424
tr|Q0VBD0|Q0VBD0_MOUSE	Itgb8	Q0VBD0_MOUSE Integrin beta	15	1857.85	2215.95	1793.57	2267.37	1741.06	1816.59	1761.54	1957.54	1845.19	11.2393	12.0572	10.5485	11.5502	11.4796	11.6542	9.77644	10.939	10.7555
sp|P54754|EPHB3_MOUSE	Ephb3	EPHB3_MOUSE Ephrin type-B receptor 3	15	1657.71	2048.32	1938.29	2115.01	1528.59	1702.88	1648.71	1770.48	1789.88	10.6882	11.8783	12.1496	11.4828	10.7417	11.6434	9.75216	10.5445	11.1194
sp|Q8VCW8|ACSF2_MOUSE	Acsf2	ACSF2_MOUSE Acyl-CoA synthetase family member 2, mitochondrial	15	2405.27	2789.58	2553.98	3086.37	2170.1	2461.84	2649.34	2735.35	2619.5	10.7124	11.1744	11.0583	11.5747	10.5339	11.6274	10.8248	11.2532	11.2409
sp|P61294|RAB6B_MOUSE	Rab6b	RAB6B_MOUSE Ras-related protein Rab-6B	15	2050.92	2270.13	2028.48	2485.57	1844.62	1985.73	2193.16	2105.32	1965.81	11.3155	11.2652	10.8803	11.5476	11.0922	11.6184	11.1009	10.7296	10.4503
sp|Q68FD9|K1549_MOUSE	Kiaa1549	K1549_MOUSE UPF0606 protein KIAA1549	15	2279.44	2530.64	2414.44	2724.82	1812.2	2158.46	2439.18	2207.7	2101.43	11.5338	11.5169	11.877	11.6097	9.99394	11.5821	11.3227	10.3187	10.2452
sp|Q9CWJ9|PUR9_MOUSE	Atic	PUR9_MOUSE Bifunctional purine biosynthesis protein PURH	15	2120.24	2297.55	2123.19	2473.99	1669.22	1969.02	2190.2	2052.58	2024.53	11.7157	11.4185	11.4056	11.5112	10.0527	11.5381	11.1027	10.4767	10.7788
sp|Q61739|ITA6_MOUSE	Itga6	ITA6_MOUSE Integrin alpha-6	15	1681.57	1948.07	1719.8	2033.29	1572.78	1693.38	1833.05	1867.91	1911.26	10.7956	11.2486	10.7339	10.9919	11.005	11.5289	10.7962	11.0772	11.8227
sp|Q8BH66|ATLA1_MOUSE	Atl1	ATLA1_MOUSE Atlastin-1	15	1586.65	1725.19	1560.97	1788.21	1357.03	1502.4	1794.2	1610.04	1546.32	11.4501	11.1976	10.9514	10.8664	10.6735	11.4978	11.8785	10.7326	10.752
sp|P46735|MYO1B_MOUSE	Myo1b	MYO1B_MOUSE Unconventional myosin-Ib	15	1718.19	2024.87	2052.66	2127.29	1687.69	1889.11	2242.97	2287.75	2163.77	9.8606	10.4518	11.4524	10.2801	10.5563	11.4971	11.8091	12.1278	11.9648
sp|Q9Z2X1|HNRPF_MOUSE	Hnrnpf	HNRPF_MOUSE Heterogeneous nuclear ribonucleoprotein F	15	2159.57	2452.77	2052.62	2528.39	1852.01	2083.34	2190.99	2489.85	2291.12	11.227	11.4687	10.3741	11.0683	10.4936	11.4857	10.4496	11.9567	11.4764
sp|Q811D0-2|DLG1_MOUSE	Dlg1	DLG1_MOUSE Isoform 2 of Disks large homolog 1	15	2433.18	2738.4	2632.81	2925.73	2310.4	2461.69	2742.05	2866.06	2632.36	10.6965	10.8275	11.2521	10.8304	11.0699	11.4763	11.0587	11.6385	11.15
sp|Q60865|CAPR1_MOUSE	Caprin1	CAPR1_MOUSE Caprin-1	15	2139.21	2175.62	2569.4	2783.54	1475.09	2163.21	2907.56	2245.62	2545.12	10.6781	9.76756	12.4687	11.6998	8.02504	11.4509	13.3147	10.3543	12.2409
sp|Q149F3|ERF3B_MOUSE	Gspt2	ERF3B_MOUSE Eukaryotic peptide chain release factor GTP-binding subunit ERF3B	15	3219.58	3467.88	3386.4	3664.11	2738.37	3054.87	3457.79	3328.43	3233.9	11.3754	11.0203	11.6319	10.9012	10.545	11.4462	11.208	10.8629	11.0092
sp|P13020|GELS_MOUSE	Gsn	GELS_MOUSE Gelsolin	15	2166.42	2411.92	2035.7	2367.82	1815.18	1989.15	2185.47	2156.22	2201.63	11.7012	11.7169	10.6893	10.769	10.6855	11.3935	10.8292	10.7578	11.4576
sp|Q6GQS1|SCMC3_MOUSE	Slc25a23	SCMC3_MOUSE Calcium-binding mitochondrial carrier protein SCaMC-3	15	1568.04	1841.87	1612.61	1938.6	1532.11	1540.36	1626.45	1702.16	1625.18	10.9206	11.5375	10.9186	11.3689	11.6297	11.3766	10.3919	10.9505	10.9057
sp|D3YZP9|CCDC6_MOUSE	Ccdc6	CCDC6_MOUSE Coiled-coil domain-containing protein 6	15	1971.57	2134.96	1862.57	2270	1707.31	1812	2052.94	1988.66	1863.96	11.6573	11.3537	10.7065	11.3019	11.0024	11.3618	11.1359	10.8615	10.619
sp|Q8C437|PEX5R_MOUSE	Pex5l	PEX5R_MOUSE PEX5-related protein	15	1557.37	2008.83	1657.66	1842.09	1474.76	1522.82	1562.82	1646.49	1588.09	10.9413	12.6935	11.3219	10.8975	11.2924	11.3456	10.0727	10.6851	10.7501
sp|F8VPU2|FARP1_MOUSE	Farp1	FARP1_MOUSE FERM, RhoGEF and pleckstrin domain-containing protein 1	15	1538.57	1700.99	1581.47	1782.69	1401.54	1479.18	1709.04	1673.12	1583.97	11.1146	11.0519	11.1067	10.844	11.0349	11.3318	11.3263	11.1646	11.0252
sp|Q61330|CNTN2_MOUSE	Cntn2	CNTN2_MOUSE Contactin-2	15	1581.3	1701.22	1574.39	1739.5	1422.51	1479.54	1690.83	1632.39	1623.56	11.4177	11.0481	11.0516	10.5762	11.1946	11.329	11.2002	10.8875	11.2952
tr|E9PY16|E9PY16_MOUSE	Adap1	E9PY16_MOUSE Protein Adap1	15	4039.98	4349.27	3899.2	4537.87	3388.91	3579.45	3853.5	3832.57	3571.26	12.0347	11.6528	11.2921	11.3827	11.0028	11.3076	10.531	10.5459	10.2503
sp|Q8VHY0|CSPG4_MOUSE	Cspg4	CSPG4_MOUSE Chondroitin sulfate proteoglycan 4	15	1207.78	1283.73	1252.37	1350.94	1069.34	1093.63	1168.34	1146.07	1127.66	11.772	11.2538	11.8671	11.0876	11.3597	11.3041	10.4471	10.3185	10.5902
sp|Q3UMB5|SMCR8_MOUSE	Smcr8	SMCR8_MOUSE Smith-Magenis syndrome chromosomal region candidate gene 8 protein homolog	15	1473.86	1589.36	1622.37	1804.37	1390.09	1455.63	1690.73	1694.01	1594.65	10.7494	10.4259	11.5034	11.0814	11.0499	11.2585	11.3127	11.4126	11.2062
sp|Q99PJ0|NTRI_MOUSE	Ntm	NTRI_MOUSE Neurotrimin	15	4449.86	4952.98	4404.72	4951.92	3779.84	4043.49	4764.29	4303.47	4165.81	11.672	11.685	11.2322	10.9374	10.8059	11.2475	11.4646	10.427	10.5284
sp|Q61233|PLSL_MOUSE	Lcp1	PLSL_MOUSE Plastin-2	15	1966.85	2202.11	1846.58	2279.53	1830.23	1813.22	1873	2075.98	1968.67	11.4936	11.574	10.4906	11.2168	11.6567	11.2366	10.0411	11.2059	11.0846
sp|Q14CH0-2|F171B_MOUSE	Fam171b	F171B_MOUSE Isoform 2 of Protein FAM171B	15	1816.9	1954.14	1913.17	2070.59	1745.69	1734.03	1977.27	1971.92	1885.21	11.098	10.7357	11.3609	10.65	11.6217	11.2324	11.08	11.1261	11.0952
sp|Q91W86|VPS11_MOUSE	Vps11	VPS11_MOUSE Vacuolar protein sorting-associated protein 11 homolog	15	2677.22	2935.37	2836.91	3149.03	2517.38	2564.6	2957.65	2918.87	2749.5	11.0405	10.8875	11.3735	10.935	11.3146	11.2156	11.1895	11.1188	10.9249
sp|Q8CCK0|H2AW_MOUSE	H2afy2	H2AW_MOUSE Core histone macro-H2A.2	15	1952.75	2287.02	2290.78	2563.61	1967.27	2132.96	2491.67	2822.75	2566.73	9.68243	10.1993	11.0425	10.7036	10.6314	11.2156	11.3342	12.9286	12.2625
sp|Q8BUK6|HOOK3_MOUSE	Hook3	HOOK3_MOUSE Protein Hook homolog 3	15	2326.38	2489.18	2234.33	2676.2	2116.44	2192.97	2640.57	2564.65	2419.18	11.2139	10.7917	10.4705	10.8626	11.119	11.21	11.6771	11.4194	11.2358
sp|Q3TES0|IQEC3_MOUSE	Iqsec3	IQEC3_MOUSE IQ motif and SEC7 domain-containing protein 3	15	1553.91	1733.52	1742.89	1922.39	1385.17	1563.91	1966.6	1820.33	1798.5	10.4902	10.5256	11.4387	10.928	10.1917	11.1962	12.1797	11.3514	11.6985
sp|P62897|CYC_MOUSE	Cycs	CYC_MOUSE Cytochrome c, somatic	15	2746.31	2992.17	2813.32	3143.21	2761.85	2614.37	3057.82	3085.27	2621.01	11.0816	10.8593	11.0362	10.6799	12.1462	11.1872	11.3195	11.4998	10.1902
sp|Q99L45|IF2B_MOUSE	Eif2s2	IF2B_MOUSE Eukaryotic translation initiation factor 2 subunit 2	15	1668.73	1907.64	1751.22	2150.9	1618.31	1622.38	1736.08	1895.35	1726.95	10.843	11.1487	11.0625	11.7686	11.4608	11.1794	10.3489	11.3761	10.812
sp|Q80TL1|ADCY2_MOUSE	Adcy2	ADCY2_MOUSE Adenylate cyclase type 2	15	2274.75	2551.26	2212.48	2567.39	2126.84	2126.16	2355.3	2507.82	2374.28	11.25	11.3484	10.6377	10.6918	11.4641	11.1511	10.6863	11.4566	11.3139
sp|Q9Z2A0|PDPK1_MOUSE	Pdpk1	PDPK1_MOUSE 3-phosphoinositide-dependent protein kinase 1	15	2788.67	3116.68	2749.92	3223.96	2405.24	2570.02	3059.14	2846.21	2786.27	11.4069	11.4663	10.9355	11.1045	10.723	11.1483	11.4797	10.7542	10.9814
sp|Q8VCX5|MICU1_MOUSE	Micu1	MICU1_MOUSE Calcium uptake protein 1, mitochondrial	15	3099.83	3364.29	3085.36	3796.3	2735.16	2886.71	3422.58	3320.93	3021.19	11.2792	11.0102	10.9142	11.6316	10.847	11.1389	11.425	11.162	10.592
sp|Q6NZL0|SOGA3_MOUSE	Soga3	SOGA3_MOUSE Protein SOGA3	15	2979.36	3214.96	2881.37	3328.52	2667.06	2605.78	2910.03	2712.08	2585.89	12.0079	11.6542	11.2899	11.2963	11.7156	11.1374	10.7598	10.0969	10.0419
sp|Q9WTS6|TEN3_MOUSE	Tenm3	TEN3_MOUSE Teneurin-3	15	1184.72	1499.21	1333	1510.38	1291.03	1182.86	1238.88	1348.17	1166.49	10.5138	11.9666	11.5007	11.2868	12.4873	11.1322	10.0864	11.0518	9.97444
sp|Q8VCC9|SPON1_MOUSE	Spon1	SPON1_MOUSE Spondin-1	15	1208.14	1372.54	1406.59	1490.63	1161.59	1203.63	1407.71	1406.43	1320.63	10.5323	10.762	11.9213	10.9425	11.0369	11.1276	11.2585	11.3258	11.093
sp|Q8CBE3|WDR37_MOUSE	Wdr37	WDR37_MOUSE WD repeat-containing protein 37	15	1973.52	2230.67	2090.76	2408.86	1860.88	1852.5	1995.59	2072.95	1980.89	11.1576	11.3429	11.4915	11.4678	11.4666	11.1067	10.3505	10.8257	10.7907
sp|P70122|SBDS_MOUSE	Sbds	SBDS_MOUSE Ribosome maturation protein SBDS	15	2376.66	2760.4	2380.07	2845.89	2120.76	2192.11	2363.3	2484.66	2347.23	11.355	11.8618	11.0549	11.4492	11.0432	11.1066	10.3585	10.9654	10.8053
tr|Q91V89|Q91V89_MOUSE	Ppp2r5d	Q91V89_MOUSE Protein Ppp2r5d	15	2147.83	2394.51	2174.76	2542.49	2153.03	2096.27	2434.7	2555.03	2389.41	10.7272	10.7563	10.5595	10.6926	11.7199	11.1028	11.1556	11.7875	11.4984
sp|P45376|ALDR_MOUSE	Akr1b1	ALDR_MOUSE Aldose reductase	15	3246.7	3961.17	3155.81	4023.44	2810.34	2984.88	3113.37	3298.97	3262.31	11.3757	12.4831	10.7496	11.8706	10.732	11.0908	10.0076	10.6772	11.0134
sp|Q8K354|CBR3_MOUSE	Cbr3	CBR3_MOUSE Carbonyl reductase [NADPH] 3	15	2189.55	2578.54	2040.04	2557.12	1913.01	1966.72	2229.23	2072.95	2107.51	11.6425	12.3318	10.5458	11.4494	11.0866	11.0901	10.8745	10.1818	10.7975
sp|Q6ZQ82|RHG26_MOUSE	Arhgap26	RHG26_MOUSE Rho GTPase-activating protein 26	15	1799.89	2028.3	1966.95	2176.43	1684.47	1715.88	2001.82	1962.49	1844.48	10.9408	11.0892	11.6237	11.1401	11.1598	11.0609	11.1633	11.0193	10.8029
sp|Q8CIG8|ANM5_MOUSE	Prmt5	ANM5_MOUSE Protein arginine N-methyltransferase 5	15	1691.17	2038	1945.76	2187.1	1644.21	1670.37	1851.68	1925.45	1810.88	10.5415	11.4256	11.791	11.4795	11.1701	11.0415	10.5887	11.0863	10.8759
sp|Q61655|DD19A_MOUSE	Ddx19a	DD19A_MOUSE ATP-dependent RNA helicase DDX19A	15	3404.23	3751.37	3391.34	3873.83	2911.78	3079.69	3666.93	3501.12	3348.66	11.5003	11.3983	11.138	11.0197	10.721	11.0331	11.3646	10.9254	10.8999
sp|P97300-3|NPTN_MOUSE	Nptn	NPTN_MOUSE Isoform 3 of Neuroplastin	15	3299.31	3571.38	2859.29	3489.51	3071.02	2897.78	3417.62	3364.25	3108.38	11.8307	11.5182	9.96765	10.5364	12.0021	11.0193	11.2428	11.1434	10.7395
sp|Q9D855|QCR7_MOUSE	Uqcrb	QCR7_MOUSE Cytochrome b-c1 complex subunit 7	15	3473.3	3740.57	3329.34	4142.43	3114.27	3204.81	3997.86	3692.81	3556.51	11.2547	10.9016	10.4881	11.3028	10.9985	11.0127	11.8845	11.0532	11.1039
sp|Q91VC3|IF4A3_MOUSE	Eif4a3	IF4A3_MOUSE Eukaryotic initiation factor 4A-III	15	2281.56	2310.79	2258.55	2659.68	1966.63	2049.77	2392.62	2464.01	2251.6	11.5505	10.5218	11.1159	11.338	10.8512	11.0046	11.1123	11.5226	10.983
tr|E9Q8N8|E9Q8N8_MOUSE	Slc4a4	E9Q8N8_MOUSE Electrogenic sodium bicarbonate cotransporter 1	15	2075.46	2340.83	2173.69	2619.47	1990.85	2001.04	2348.99	2295.9	2313	10.7559	10.911	10.9516	11.431	11.2449	10.9973	11.168	10.9907	11.5497
sp|P26043|RADI_MOUSE	Rdx	RADI_MOUSE Radixin	15	2058.76	2247.41	2179.98	2465.13	1917.06	1940.06	2315.7	2288.49	2143.37	10.9944	10.7947	11.3179	11.0852	11.158	10.987	11.3451	11.289	11.0287
sp|Q62415|ASPP1_MOUSE	Ppp1r13b	ASPP1_MOUSE Apoptosis-stimulating of p53 protein 1	15	1767.16	1925.38	1824.93	2091	1517.74	1650.38	2059.61	1937.93	1885.44	11.0902	10.8678	11.1341	11.0499	10.3812	10.9837	11.858	11.2342	11.4009
sp|Q920R0|ALS2_MOUSE	Als2	ALS2_MOUSE Alsin	15	2123.84	2359.68	2258.31	2419.48	1986.7	1957.79	2305.69	2248.61	2077.88	11.2284	11.2204	11.6072	10.771	11.4476	10.9765	11.183	10.9812	10.5847
sp|P97820|M4K4_MOUSE	Map4k4	M4K4_MOUSE Mitogen-activated protein kinase kinase kinase kinase 4	15	3272.18	3460.32	3433.89	3744.3	3083.09	2941.13	3314.71	3325.15	3087.36	11.5047	10.9425	11.7374	11.0853	11.8144	10.9661	10.6916	10.7992	10.4589
sp|P45952|ACADM_MOUSE	Acadm	ACADM_MOUSE Medium-chain specific acyl-CoA dehydrogenase, mitochondrial	15	2700.01	3088.04	2523.84	3006.36	2502.28	2335.06	2524.63	2561.01	2330.05	11.9507	12.2934	10.8602	11.2049	12.0712	10.9604	10.2515	10.4708	9.93698
tr|E9Q3Q6|E9Q3Q6_MOUSE	Alcam	E9Q3Q6_MOUSE CD166 antigen	15	2067.46	2611.38	2569.83	2828.42	1946.04	2162.22	2724.06	2423.6	2587.3	9.87284	11.216	11.9304	11.3733	10.1285	10.9498	11.9339	10.6907	11.9046
sp|O88845|AKA10_MOUSE	Akap10	AKA10_MOUSE A-kinase anchor protein 10, mitochondrial	15	2102.48	2318.1	2213.26	2488.61	1902.65	1951.1	2390.17	2169.64	2213.44	11.1201	11.0273	11.3803	11.0834	10.9679	10.9435	11.5976	10.6	11.2799
sp|P02469|LAMB1_MOUSE	Lamb1	LAMB1_MOUSE Laminin subunit beta-1	15	1364.39	1574.21	1535.49	1602.45	1350.47	1389.24	1685.89	1930.71	1636.1	10.1261	10.5082	11.0789	10.0144	10.9238	10.934	11.4787	13.2361	11.6997
sp|Q80U56|AVL9_MOUSE	Avl9	AVL9_MOUSE Late secretory pathway protein AVL9 homolog	15	1767.48	1908	1786.55	2031.52	1773.31	1635.26	1924.39	1931.24	1794.29	11.1329	10.8092	10.94	10.7749	12.1738	10.923	11.1201	11.2365	10.8895
sp|Q6PHN9|RAB35_MOUSE	Rab35	RAB35_MOUSE Ras-related protein Rab-35	15	1690.71	1969.25	1712.63	2117.51	1575.44	1524.55	1670.47	1652.37	1556.09	11.4222	11.9659	11.2484	12.0461	11.6004	10.9226	10.3534	10.3117	10.1293
sp|Q6P2B1|TNPO3_MOUSE	Tnpo3	TNPO3_MOUSE Transportin-3	15	1580.22	1879.47	1668.19	2143.85	1659.54	1534.37	1532.46	1836.88	1728.05	10.6046	11.3442	10.8835	12.1147	12.1382	10.9196	9.43471	11.3868	11.1737
sp|Q7TPS5|C2CD5_MOUSE	C2cd5	C2CD5_MOUSE C2 domain-containing protein 5	15	1718.26	1935.3	1859.19	2087.54	1646.27	1580.67	1671.9	1799.1	1729.48	11.1889	11.3347	11.7698	11.4465	11.6839	10.9154	9.98783	10.8217	10.8512
tr|E9PYG6|E9PYG6_MOUSE	Rasa1	E9PYG6_MOUSE Protein Rasa1	15	1972.16	2201.04	2033.62	2353.29	1685.4	1826.54	2208.75	2178.3	2133.16	11.0932	11.1353	11.1206	11.1462	10.3324	10.8954	11.3978	11.318	11.5611
sp|Q8BH55|THNS1_MOUSE	Thnsl1	THNS1_MOUSE Threonine synthase-like 1	15	2519.01	2990.44	2677.96	3122.91	2467.12	2342.89	2469.43	2780.25	2526.21	11.0082	11.7539	11.3773	11.4918	11.7507	10.8577	9.90024	11.2231	10.637
sp|Q06138|CAB39_MOUSE	Cab39	CAB39_MOUSE Calcium-binding protein 39	15	2683.09	2930.63	2543.79	3100.57	2410.69	2322.58	2676.96	2621.96	2451.6	11.8025	11.5947	10.8784	11.4847	11.5576	10.8345	10.8029	10.6538	10.3908
sp|P97927|LAMA4_MOUSE	Lama4	LAMA4_MOUSE Laminin subunit alpha-4	15	1249.74	1752.54	1620.24	1572.91	1280.03	1365.52	1627.57	1810.32	1754.52	9.30923	11.7415	11.7333	9.86592	10.3921	10.7868	11.1223	12.4563	12.5926
tr|E9Q411|E9Q411_MOUSE	Nbas	E9Q411_MOUSE Protein Nbas	15	1446.6	1647.63	1620.59	1773.3	1439.63	1374.18	1557.96	1700.87	1562.06	10.6925	10.9535	11.6453	11.0371	11.5977	10.7715	10.5645	11.613	11.1248
sp|Q9Z0N1|IF2G_MOUSE	Eif2s3x	IF2G_MOUSE Eukaryotic translation initiation factor 2 subunit 3, X-linked	15	2530.85	2733.04	2451.56	2915.62	2187.24	2194.24	2585.81	2553.4	2456.73	11.6973	11.3612	11.0156	11.3472	11.018	10.7548	10.9642	10.9013	10.9405
tr|E9PV86|E9PV86_MOUSE	Mctp1	E9PV86_MOUSE Protein Mctp1	15	1728.52	1907.86	1925.04	2036.49	1686.05	1628.56	1949.75	2053.18	1946.77	10.6986	10.6209	11.5835	10.6139	11.3739	10.6895	11.0712	11.7387	11.6099
sp|Q91VW5|GOGA4_MOUSE	Golga4	GOGA4_MOUSE Golgin subfamily A member 4	15	1754	1813.54	1745.94	1998.86	1646.83	1556.88	1917.78	1870.78	1838.62	11.3377	10.5434	10.9716	10.8797	11.6019	10.6721	11.3724	11.1701	11.4511
tr|Q8BML9|Q8BML9_MOUSE	Qars	Q8BML9_MOUSE Glutaminyl-tRNA synthetase	15	1784.26	1906.64	1847	2076.25	1620.15	1594.76	2000.17	1941.84	1846.47	11.2162	10.78	11.2876	10.9902	11.1002	10.6312	11.535	11.2757	11.1839
sp|Q3THS6|METK2_MOUSE	Mat2a	METK2_MOUSE S-adenosylmethionine synthase isoform type-2	15	1913.01	2080.14	1865.92	2211.23	1638.31	1623.6	1968.05	1877.91	1761.53	11.8053	11.5455	11.1943	11.4903	11.019	10.6252	11.1418	10.7047	10.4739
sp|Q8K1X1|WDR11_MOUSE	Wdr11	WDR11_MOUSE WD repeat-containing protein 11	15	1896.39	2160.63	2097.47	2350.39	1789.14	1758.38	2096.89	2126.28	2085.9	10.7932	11.0602	11.6055	11.2642	11.0982	10.6129	10.9486	11.1785	11.4387
sp|Q3UHD3|MTUS2_MOUSE	Mtus2	MTUS2_MOUSE Microtubule-associated tumor suppressor candidate 2 homolog	15	1649.35	1862.68	1666.57	1902.05	1705.54	1517.6	1903.89	1934.88	1677.74	10.8759	11.0472	10.6837	10.5612	12.2574	10.6123	11.5174	11.7855	10.6595
sp|Q63912|OMGP_MOUSE	Omg	OMGP_MOUSE Oligodendrocyte-myelin glycoprotein	15	2560.91	2707.23	2636.43	3105.15	2336.12	2348.87	3016.67	2982.76	2847.91	10.908	10.3713	10.9172	11.1371	10.845	10.6098	11.7879	11.7357	11.6879
sp|Q8C854|MYEF2_MOUSE	Myef2	MYEF2_MOUSE Myelin expression factor 2	15	2096.96	2402.18	2278.81	2808.75	2037.43	1947.8	2141.4	2404.05	2251.79	10.7652	11.0917	11.3733	12.1418	11.3999	10.6042	10.0853	11.4003	11.1383
sp|P13707|GPDA_MOUSE	Gpd1	GPDA_MOUSE Glycerol-3-phosphate dehydrogenase [NAD(+)], cytoplasmic	15	1884.77	2205.7	1878.02	2370.45	1707.74	1651.36	1849.52	1916.71	1877.64	11.3682	11.9658	11.0123	12.0394	11.2264	10.5627	10.2342	10.679	10.9121
sp|Q9CZX8|RS19_MOUSE	Rps19	RS19_MOUSE 40S ribosomal protein S19	15	1921.59	1955.97	1806.84	2199.66	1604.14	1612.28	2089.36	1962.87	1793.88	11.8572	10.8553	10.8389	11.4292	10.7882	10.5502	11.8276	11.188	10.6654
sp|Q9JLJ2|AL9A1_MOUSE	Aldh9a1	AL9A1_MOUSE 4-trimethylaminobutyraldehyde dehydrogenase	15	2121.16	2384.37	1906.7	2465.83	1831.74	1735.98	2022.9	2008.75	1882.31	12.0808	12.214	10.5573	11.8257	11.3703	10.485	10.5696	10.5679	10.3294
sp|Q80Z24|NEGR1_MOUSE	Negr1	NEGR1_MOUSE Neuronal growth regulator 1	15	2190.63	2641.67	2616.37	2998.09	2496.26	2136.01	2444.91	2626.62	2410.55	10.136	10.9935	11.7691	11.681	12.5885	10.4809	10.3782	11.2262	10.7467
sp|P62317|SMD2_MOUSE	Snrpd2	SMD2_MOUSE Small nuclear ribonucleoprotein Sm D2	15	2903.81	3476.39	3234.69	3975.4	3010.17	2802.96	3110.58	3852.14	3306.35	10.2342	11.0198	11.0832	11.7979	11.5628	10.4761	10.0574	12.5409	11.2278
sp|Q9QY76|VAPB_MOUSE	Vapb	VAPB_MOUSE Vesicle-associated membrane protein-associated protein B	15	3590.19	3900.83	3641.99	4303.58	3317.81	3103.1	3835.91	3826.09	3522.05	11.3553	11.0968	11.1987	11.4617	11.4372	10.4082	11.1304	11.1783	10.7334
tr|G3UXW9|G3UXW9_MOUSE	Gps1	G3UXW9_MOUSE COP9 signalosome complex subunit 1	15	1537.09	1846.72	1501.57	1871.44	1693.07	1394.82	1520.19	1893.61	1582.8	10.804	11.6748	10.2607	11.0765	12.9702	10.3969	9.80269	12.2947	10.7195
sp|Q6GYP7|RGPA1_MOUSE	Ralgapa1	RGPA1_MOUSE Ral GTPase-activating protein subunit alpha-1	15	2281.64	2548.5	2492.94	2766.56	2120.59	2050.22	2590.01	2705.42	2389.8	10.87	10.9202	11.5463	11.0985	11.011	10.3582	11.32	11.9058	10.97
sp|Q8CJF7|ELYS_MOUSE	Ahctf1	ELYS_MOUSE Protein ELYS	15	911.031	963.834	1067.11	1118.93	874.103	878.493	1229.27	1260.28	1102.67	10.1269	9.63619	11.5318	10.4733	10.5899	10.3557	12.5358	12.9405	11.81
sp|Q8BLY2|SYTC2_MOUSE	Tarsl2	SYTC2_MOUSE Probable threonine--tRNA ligase 2, cytoplasmic	15	2308	2557.85	2622.16	3003.82	2271.49	2198.62	2932.25	2940.08	2733.07	10.2424	10.2095	11.3129	11.2249	10.9867	10.3471	11.938	12.0522	11.6864
sp|Q8CJG0|AGO2_MOUSE	Ago2	AGO2_MOUSE Protein argonaute-2	15	2386.25	2668.94	2812.89	3117.86	2221.47	2192.52	2778.56	2800.41	2554.34	10.6102	10.6735	12.1593	11.6736	10.7655	10.3384	11.3342	11.5019	10.9433
sp|Q3TEA8|HP1B3_MOUSE	Hp1bp3	HP1B3_MOUSE Heterochromatin protein 1-binding protein 3	15	3247.36	3777.31	3958.84	4493.25	2955.26	3170.38	4298.51	4267.67	4094.75	9.93349	10.3924	11.773	11.5737	9.85267	10.2845	12.0629	12.0588	12.0687
tr|B1AR17|B1AR17_MOUSE	Chd3	B1AR17_MOUSE Protein Chd3	15	1486.32	1640.86	1870.94	1918.95	1475.98	1465.44	1946.06	2116.2	1920.02	9.81088	9.74156	12.0061	10.6659	10.6185	10.258	11.7846	12.9031	12.2113
sp|P56959|FUS_MOUSE	Fus	FUS_MOUSE RNA-binding protein FUS	15	2624.29	2679.97	2576.42	3028.1	2310.26	2220.74	2923	2950.93	2688.05	11.43	10.4985	10.9093	11.1057	10.9669	10.2573	11.6795	11.8723	11.2806
sp|P14148|RL7_MOUSE	Rpl7	RL7_MOUSE 60S ribosomal protein L7	15	3883.28	4144.79	4103.04	4615	3545.96	3425.15	4844.09	4522.53	4128.45	10.9134	10.4767	11.2102	10.9213	10.8613	10.208	12.4892	11.7405	11.1792
sp|Q8K019|BCLF1_MOUSE	Bclaf1	BCLF1_MOUSE Bcl-2-associated transcription factor 1	15	2288.54	2456.35	2654.3	2824.54	2184.96	2161.81	3116.02	3184.19	2717.67	10.1491	9.79765	11.4437	10.5477	10.5609	10.1669	12.6775	13.044	11.6126
sp|Q9JKB1|UCHL3_MOUSE	Uchl3	UCHL3_MOUSE Ubiquitin carboxyl-terminal hydrolase isozyme L3	15	2365.37	2732.15	2328.58	2801.41	2293.47	2096.89	2884.05	2665.8	2873.34	10.7294	11.1466	10.2687	10.7002	11.3386	10.0868	12.0017	11.1698	12.5582
sp|Q9CXY6|ILF2_MOUSE	Ilf2	ILF2_MOUSE Interleukin enhancer-binding factor 2	15	2583.82	2746.23	2620.4	3034.39	2296.31	2224.28	3218.94	2922.64	2854.59	11.032	10.546	10.8769	10.9094	10.6858	10.0712	12.6085	11.5267	11.7435
sp|Q3UYC0|PPM1H_MOUSE	Ppm1h	PPM1H_MOUSE Protein phosphatase 1H	15	1796.1	2028.03	1853.28	2126.89	1679.34	1456.66	1760.01	1708	1666.94	11.6733	11.8549	11.7098	11.6399	11.8957	10.0397	10.494	10.254	10.4387
sp|Q8R0G9|NU133_MOUSE	Nup133	NU133_MOUSE Nuclear pore complex protein Nup133	15	1826.91	1975.06	1887.5	2078.55	1712.72	1512.06	1941.91	2124.75	1789.72	11.328	11.0148	11.3781	10.8527	11.5747	9.94273	11.0465	12.1698	10.6926
sp|Q9CQE8|CN166_MOUSE		CN166_MOUSE UPF0568 protein C14orf166 homolog	15	3783.81	3966.77	3195.92	4386.55	3280.93	2922.04	3855.42	3778.81	3495.34	12.1189	11.427	9.95124	11.8303	11.453	9.92479	11.3284	11.1797	10.7866
sp|P08775|RPB1_MOUSE	Polr2a	RPB1_MOUSE DNA-directed RNA polymerase II subunit RPB1	15	1764.81	1955.64	2142.58	2215.61	1765.35	1655.1	2312.94	2504.19	2187.82	9.97366	9.94046	11.7717	10.5436	10.8736	9.9193	11.9917	13.0727	11.9132
sp|Q9QX47|SON_MOUSE	Son	SON_MOUSE Protein SON	15	1727.74	1894.19	2055.51	2099.97	1639.46	1619.24	2463.18	2401.56	2221.77	9.97491	9.83592	11.5371	10.209	10.3162	9.91384	13.0463	12.8075	12.3592
sp|Q99KK2|NEUA_MOUSE	Cmas	NEUA_MOUSE N-acylneuraminate cytidylyltransferase	15	2294.05	2445.09	2449.57	2795.41	2126.65	1904.11	2602.96	2648.01	2492.9	11.0283	10.5721	11.4483	11.3159	11.1426	9.70725	11.4798	11.7588	11.547
sp|O35841|API5_MOUSE	Api5	API5_MOUSE Apoptosis inhibitor 5	15	2509.27	2602.81	2605.37	2888.3	2419.46	2109.8	3143.4	3198.58	2855.99	10.7787	10.056	10.8802	10.4473	11.3273	9.61086	12.3874	12.6917	11.8206
sp|Q8K3E5|AHI1_MOUSE	Ahi1	AHI1_MOUSE Jouberin	15	1262.16	1517.78	1600.06	1962.09	1538.64	1199.85	1626.44	1761.81	1687.96	9.3284	10.0893	11.4968	12.211	12.3941	9.40416	11.0279	12.028	12.0203
sp|Q9EQZ7|RIMS2_MOUSE	Rims2	RIMS2_MOUSE Regulating synaptic membrane exocytosis protein 2	14	1253.55	1418.77	1509.39	1638.92	1106.85	1564.7	1549.88	1429.08	1456.41	10.1191	10.3008	11.8453	11.1403	9.73813	13.3946	11.4778	10.6561	11.3278
tr|B1AQZ0|B1AQZ0_MOUSE	2017-09-08	B1AQZ0_MOUSE Septin-8	14	1933.69	2060.86	1894.74	2258.78	1637.99	2074.95	1937.82	1772.27	1873.2	11.5536	11.0749	11.0059	11.3643	10.6667	13.1473	10.622	9.7814	10.7839
sp|Q8BG95|MYPT2_MOUSE	Ppp1r12b	MYPT2_MOUSE Protein phosphatase 1 regulatory subunit 12B	14	1419.23	1630.29	1624.57	1786.54	1121.26	1635.48	1687.98	1494.76	1533.66	10.6447	10.9978	11.8458	11.2832	9.16587	13.0085	11.6147	10.356	11.0834
sp|O89112|LANC1_MOUSE	Lancl1	LANC1_MOUSE LanC-like protein 1	14	1818.75	2063.94	1827.36	2254.88	1637.49	1922.95	1821.55	1839.78	1787.26	11.1807	11.4118	10.9211	11.6723	10.9714	12.5361	10.273	10.4473	10.5863
tr|A3QM89|A3QM89_MOUSE	Rtn1	A3QM89_MOUSE Reticulon (Fragment)	14	1350.13	1598.04	1385.03	1701.5	1356.24	1437.33	1258.78	1334.5	1321.54	11.0395	11.7523	11.0098	11.7151	12.0864	12.4633	9.44248	10.0794	10.4116
sp|Q61282|PGCA_MOUSE	Acan	PGCA_MOUSE Aggrecan core protein	14	1606.63	1835.02	1484.6	1771.36	1369.74	1647.04	1695.08	1440.29	1920.98	11.3399	11.6492	10.1871	10.5279	10.5371	12.3282	10.9761	9.39044	13.0641
sp|Q9CPU0|LGUL_MOUSE	Glo1	LGUL_MOUSE Lactoylglutathione lyase	14	1325.03	2080.93	1657.96	2210.39	1536.94	1899.66	2647.94	1990.92	1916.03	8.04324	11.3612	9.78421	11.2983	10.1683	12.2287	14.746	11.1635	11.2065
sp|Q9CZS1|AL1B1_MOUSE	Aldh1b1	AL1B1_MOUSE Aldehyde dehydrogenase X, mitochondrial	14	1685.57	1801.63	1567.34	1895.07	1448.86	1641.28	1736.32	1581.83	1646.05	11.7174	11.2645	10.5924	11.093	10.9773	12.0995	11.0732	10.1574	11.0253
sp|P62881|GBB5_MOUSE	Gnb5	GBB5_MOUSE Guanine nucleotide-binding protein subunit beta-5	14	1921.1	2140.56	1765.51	2180.28	1688.79	1798.76	1732.88	1728.74	1684.14	12.0399	12.0659	10.7569	11.506	11.5355	11.9549	9.96327	10.0079	10.1698
sp|Q80XG9|LRRT4_MOUSE	Lrrtm4	LRRT4_MOUSE Leucine-rich repeat transmembrane neuronal protein 4	14	1515.77	1662.33	1493.91	1794.85	1261.86	1511.76	1611.98	1578.31	1623.19	11.2665	11.113	10.7951	11.2337	10.2224	11.9162	10.992	10.8365	11.6248
sp|Q8CHT0|AL4A1_MOUSE	Aldh4a1	AL4A1_MOUSE Delta-1-pyrroline-5-carboxylate dehydrogenase, mitochondrial	14	1779.97	2169.89	1846.77	2183.62	1725.57	1888.18	1946.1	2094.73	1935.81	10.5735	11.5932	10.6651	10.9225	11.1718	11.8946	10.6055	11.4941	11.0797
sp|Q8BG40|KTNB1_MOUSE	Katnb1	KTNB1_MOUSE Katanin p80 WD40 repeat-containing subunit B1	14	1647.83	1811.55	1720.76	1934.63	1453.67	1650.04	1751.51	1749.93	1704.7	11.1497	11.0246	11.3193	11.0227	10.7202	11.8399	10.8724	10.9374	11.1138
sp|P00405|COX2_MOUSE	Mtco2	COX2_MOUSE Cytochrome c oxidase subunit 2	14	1419.09	1512.34	1332.79	1590.2	1207.28	1335.28	1463.93	1356.58	1292.52	11.8382	11.3471	10.8089	11.1703	10.9767	11.8127	11.2036	10.4535	10.389
sp|Q9WUM3|COR1B_MOUSE	Coro1b	COR1B_MOUSE Coronin-1B	14	3485.46	4041.15	3644.17	4199.26	3098.82	3516.96	3761.79	3712.62	3708.3	10.9745	11.4444	11.155	11.1337	10.6343	11.7434	10.8663	10.7981	11.2503
sp|Q63844|MK03_MOUSE	Mapk3	MK03_MOUSE Mitogen-activated protein kinase 3	14	1498.33	1579.33	1475.1	1765.53	1282.26	1453.69	1567.94	1583.66	1522.77	11.3966	10.8044	10.9077	11.3079	10.6299	11.7257	10.941	11.1268	11.16
sp|Q8R550|SH3K1_MOUSE	Sh3kbp1	SH3K1_MOUSE SH3 domain-containing kinase-binding protein 1	14	1870.14	2029.28	1941.4	2255.26	1706.65	1865.4	2035.24	2032.27	1890.52	11.0751	10.8088	11.1773	11.2463	11.0155	11.7151	11.0573	11.1172	10.7874
sp|Q8C0D5|ETUD1_MOUSE	Eftud1	ETUD1_MOUSE Elongation factor Tu GTP-binding domain-containing protein 1	14	1980.28	2127.26	2176.04	2178.41	1970.28	1949.16	1892.65	2223.72	1866.65	11.2217	10.8421	11.988	10.3947	12.1688	11.7133	9.83931	11.64	10.192
sp|Q60996|2A5G_MOUSE	Ppp2r5c	2A5G_MOUSE Serine/threonine-protein phosphatase 2A 56 kDa regulatory subunit gamma isoform	14	1872.01	2090.32	1874.14	2265.89	1557.94	1834.22	2069.61	1922.05	1901.63	11.2557	11.3042	10.9551	11.4721	10.2095	11.6955	11.416	10.6751	11.0168
sp|Q6PER3|MARE3_MOUSE	Mapre3	MARE3_MOUSE Microtubule-associated protein RP/EB family member 3	14	2565.6	2845.57	2481.86	2988.19	2198.56	2472.79	2726.8	2640.97	2527.37	11.4287	11.4008	10.7481	11.2087	10.6741	11.6814	11.1435	10.867	10.8477
sp|Q8R5M8|CADM1_MOUSE	Cadm1	CADM1_MOUSE Cell adhesion molecule 1	14	1798.77	2190.43	1813.9	2094.97	1656.74	1765.02	1843.63	1853.62	1751.48	11.1968	12.2634	10.9769	10.9809	11.2398	11.6512	10.5282	10.6581	10.5048
sp|Q9JM13|RABX5_MOUSE	Rabgef1	RABX5_MOUSE Rab5 GDP/GTP exchange factor	14	1377.36	1577.99	1460.51	1767.32	1368.11	1408.99	1414	1531.06	1496.56	10.7242	11.0506	11.0553	11.5871	11.6098	11.6339	10.1002	11.0116	11.2273
sp|Q9D1P4|CHRD1_MOUSE	Chordc1	CHRD1_MOUSE Cysteine and histidine-rich domain-containing protein 1	14	2766.9	3116.12	2681.2	3318.09	2574.54	2732	2972.58	3074.12	2773.38	11.1066	11.2502	10.4631	11.2154	11.2635	11.6297	10.9466	11.3985	10.7265
sp|O88544|CSN4_MOUSE	Cops4	CSN4_MOUSE COP9 signalosome complex subunit 4	14	3215.74	3392.7	2987.51	3830.19	2336.61	2853.07	3209.27	2608.98	2810.5	12.3534	11.7223	11.1573	12.3898	9.78314	11.623	11.3103	9.25799	10.4028
sp|Q810B7|SLIK5_MOUSE	Slitrk5	SLIK5_MOUSE SLIT and NTRK-like protein 5	14	1694.01	1842.81	1721.63	2010.4	1516.74	1661.89	1837.28	1757.66	1786.23	11.1715	10.9304	11.0377	11.1639	10.9016	11.6224	11.1155	10.707	11.3499
sp|Q9QUR8|SEM7A_MOUSE	Sema7a	SEM7A_MOUSE Semaphorin-7A	14	1434.42	1553.46	1349.51	1562.39	1235.86	1367.05	1560.69	1458.86	1496.82	11.4961	11.1978	10.5147	10.5439	10.7952	11.6187	11.475	10.8001	11.5586
sp|Q920P3|BRNP1_MOUSE	Brinp1	BRNP1_MOUSE BMP/retinoic acid-inducible neural-specific protein 1	14	1915.77	2103.12	1870.07	2176.45	1666.03	1821.45	1992.05	1982.7	1838.34	11.516	11.3706	10.9285	11.0166	10.9151	11.6111	10.9855	11.0092	10.6474
sp|O35607|BMPR2_MOUSE	Bmpr2	BMPR2_MOUSE Bone morphogenetic protein receptor type-2	14	1885.44	2055.6	2061.74	2228.53	1747.14	1850.96	2027.08	1918.97	1895.55	11.1295	10.9134	11.8316	11.0769	11.2403	11.5867	10.9773	10.4634	10.781
sp|Q8CHU3|EPN2_MOUSE	Epn2	EPN2_MOUSE Epsin-2	14	1206.12	1291.43	1221.52	1413.79	1020.85	1197.99	1456.01	1355.39	1320.18	10.9762	10.5704	10.8071	10.8339	10.1253	11.5615	12.1559	11.3937	11.5759
sp|Q6PD03|2A5A_MOUSE	Ppp2r5a	2A5A_MOUSE Serine/threonine-protein phosphatase 2A 56 kDa regulatory subunit alpha isoform	14	2384.85	2767.41	2574.16	2991.96	2126.95	2431.8	2736.76	2718.1	2613.93	10.6786	11.1452	11.2056	11.281	10.38	11.5474	11.2422	11.2424	11.2774
sp|Q3TY60-2|F131B_MOUSE	Fam131b	F131B_MOUSE Isoform 2 of Protein FAM131B	14	1489.33	1683.62	1493.72	1780.04	1340.26	1497.71	1711.19	1728.31	1650.2	10.8236	11.0049	10.5535	10.8931	10.6159	11.5427	11.4088	11.6023	11.5552
sp|O35598|ADA10_MOUSE	Adam10	ADA10_MOUSE Disintegrin and metalloproteinase domain-containing protein 10	14	1964.92	2303.44	2113.97	2497.14	1859.64	1989.15	2003.27	2255.48	2167.47	10.7136	11.2961	11.2056	11.4649	11.0511	11.5016	10.0205	11.3598	11.3869
sp|O08688|CAN5_MOUSE	Capn5	CAN5_MOUSE Calpain-5	14	1821.75	2121.59	1999.04	2375.4	1759.11	1851.51	1985.71	2000.09	1929.1	10.6646	11.1706	11.3769	11.7093	11.2237	11.4943	10.6643	10.8155	10.881
sp|Q3UMY5-2|EMAL4_MOUSE	Eml4	EMAL4_MOUSE Isoform 2 of Echinoderm microtubule-associated protein-like 4	14	1800.97	2062.62	2060.89	2244.73	1741.57	1858.33	2063.45	2081.26	2003.75	10.4922	10.8078	11.6724	11.0119	11.0583	11.4811	11.0284	11.2002	11.2477
sp|Q61166|MARE1_MOUSE	Mapre1	MARE1_MOUSE Microtubule-associated protein RP/EB family member 1	14	2358.68	2567.94	2369.16	2854.59	1960.82	2226.34	2511.32	2337.92	2313.61	11.4688	11.2304	11.1993	11.6878	10.3914	11.48	11.2024	10.5007	10.8393
sp|Q80YD1|SUV3_MOUSE	Supv3l1	SUV3_MOUSE ATP-dependent RNA helicase SUPV3L1, mitochondrial	14	1898.56	2154.54	2081.75	2420	1802.72	1927.11	2036.61	2174.26	2139.22	10.6395	10.8596	11.3416	11.4196	11.0106	11.4526	10.4705	11.2551	11.5509
sp|Q9QZE5|COPG1_MOUSE	Copg1	COPG1_MOUSE Coatomer subunit gamma-1	14	2235.48	2411.73	2471.8	2692.06	2178.83	2295.9	2534.33	2766.49	2592.86	10.5136	10.2017	11.3016	10.6612	11.1684	11.4508	10.9347	12.0185	11.7496
sp|P51855|GSHB_MOUSE	Gss	GSHB_MOUSE Glutathione synthetase	14	1728.59	1818.61	1569.56	1864.08	1317.25	1510.07	1705.01	1610.23	1530.17	12.327	11.6645	10.8815	11.1936	10.2381	11.4199	11.1546	10.607	10.5139
sp|Q8BL65-4|ABLM2_MOUSE	Ablim2	ABLM2_MOUSE Isoform 4 of Actin-binding LIM protein 2	14	1365.62	1542.74	1330.71	1644.58	1228.1	1266.13	1286.49	1323.02	1299.02	11.6056	11.7921	10.9943	11.7688	11.3752	11.4108	10.0301	10.386	10.6369
sp|P61082|UBC12_MOUSE	Ube2m	UBC12_MOUSE NEDD8-conjugating enzyme Ubc12	14	2677.95	2836.89	2555.53	3092.75	2270.09	2419.51	2582.61	2594.57	2455.07	11.9075	11.3454	11.047	11.5798	11.0014	11.4089	10.5351	10.6567	10.5182
tr|A2AD03|A2AD03_MOUSE	Chm	A2AD03_MOUSE Rab proteins geranylgeranyltransferase component A 1	14	2024.57	2429.19	2012.75	2476.47	1984.47	1938.69	1880.19	2069.72	1987.63	11.2338	12.1231	10.8575	11.5709	12.0012	11.4078	9.57097	10.6083	10.6265
tr|E9PZA8|E9PZA8_MOUSE	Syt7	E9PZA8_MOUSE Synaptotagmin-7	14	2444.8	2713.91	2578.33	2821.02	2233.37	2370.95	2758.53	2661.96	2527.63	11.0418	11.0244	11.3209	10.7286	10.9937	11.3559	11.4297	11.1055	10.9995
sp|Q91V61|SFXN3_MOUSE	Sfxn3	SFXN3_MOUSE Sideroflexin-3	14	2802.48	3035.69	2676.62	3283.53	2353.36	2554.73	2883.93	2730.84	2623.04	11.7408	11.4386	10.9015	11.5833	10.7456	11.3501	11.0841	10.568	10.5882
sp|Q80U19|DAAM2_MOUSE	Daam2	DAAM2_MOUSE Disheveled-associated activator of morphogenesis 2	14	1841.88	2021.08	2002.56	2292.26	1668.34	1848.76	2153.52	2089.58	2144.22	10.6544	10.5151	11.2616	11.1653	10.5182	11.341	11.4282	11.1653	11.9509
sp|Q91YE6|IPO9_MOUSE	Ipo9	IPO9_MOUSE Importin-9	14	2132.67	2459.52	2258.71	2584.56	2062.36	2073.13	2120.35	2346.33	2195.96	10.9978	11.4076	11.3238	11.223	11.5914	11.3373	10.0312	11.1767	10.9111
sp|Q9D8Y0|EFHD2_MOUSE	Efhd2	EFHD2_MOUSE EF-hand domain-containing protein D2	14	1942.35	2148.14	1614.55	2132.55	1621.21	1710.12	1854.98	1844.87	1840.89	12.1397	12.0755	9.81025	11.2233	11.0435	11.3347	10.6361	10.651	11.0859
sp|Q3UV70|PDP1_MOUSE	Pdp1	PDP1_MOUSE [Pyruvate dehydrogenase [acetyl-transferring]]-phosphatase 1, mitochondrial	14	1643.92	1704.57	1547.63	1875.67	1452.87	1479.79	1656.39	1576.3	1518.71	11.8671	11.0673	10.8612	11.4014	11.4308	11.3283	10.9695	10.511	10.5633
sp|Q8BG73|SH3L2_MOUSE	Sh3bgrl2	SH3L2_MOUSE SH3 domain-binding glutamic acid-rich-like protein 2	14	1193.38	1390.12	1145.25	1350.89	1083.35	1116.26	1173.58	1262.39	1198.09	11.4131	11.9574	10.6481	10.8789	11.2923	11.3212	10.2967	11.1522	11.0402
sp|Q9CS42|PRPS2_MOUSE	Prps2	PRPS2_MOUSE Ribose-phosphate pyrophosphokinase 2	14	1911.67	2075.55	1775.37	2197.71	1763.07	1764.08	1899.18	1969.63	1884.53	11.5685	11.2968	10.4447	11.1988	11.6284	11.3209	10.5436	11.01	10.9882
sp|Q08943|SSRP1_MOUSE	Ssrp1	SSRP1_MOUSE FACT complex subunit SSRP1	14	2148.9	2049.34	2242.03	2392.28	1963.26	2025.55	2257.82	2518.58	2205.65	11.3118	9.70265	11.4737	10.6039	11.2637	11.3073	10.9035	12.2465	11.187
tr|D3YZI9|D3YZI9_MOUSE	Pgbd5	D3YZI9_MOUSE Protein Pgbd5	14	2383.23	2785.21	2617.27	3093.74	2270.21	2479.57	2996.75	2880.61	2816.17	10.2437	10.7674	10.9367	11.1974	10.6352	11.3024	11.8169	11.4372	11.6631
sp|Q8BGD5|CPT1C_MOUSE	Cpt1c	CPT1C_MOUSE Carnitine O-palmitoyltransferase 1, brain isoform	14	1562.33	1779.87	1838.08	2076.82	1505.47	1605.73	1757.34	1787.37	1829.02	10.3685	10.6241	11.8591	11.6059	10.8893	11.3009	10.6994	10.9571	11.6956
sp|Q8K1R3|PNPT1_MOUSE	Pnpt1	PNPT1_MOUSE Polyribonucleotide nucleotidyltransferase 1, mitochondrial	14	1674.26	1838.27	1725.62	2007.9	1442.6	1598.1	1881.13	1805.92	1712.53	11.1565	11.0173	11.1788	11.2664	10.477	11.293	11.4997	11.1159	10.9953
sp|Q61207|SAP_MOUSE	Psap	SAP_MOUSE Sulfated glycoprotein 1	14	1991.13	2099.98	2476.93	2670.53	2307.54	2259.9	2968.13	2827.78	2565.68	9.36767	8.88604	11.329	10.5796	11.8323	11.2751	12.8108	12.2891	11.6304
sp|P0C027|NUD10_MOUSE	Nudt10	NUD10_MOUSE Diphosphoinositol polyphosphate phosphohydrolase 3-alpha	14	1527.6	1742.93	1648.06	1883.97	1216.52	1456.53	1678.85	1516.88	1673.6	11.1437	11.4356	11.6879	11.5726	9.67218	11.2678	11.2355	10.2214	11.7634
sp|Q8C079|STRP1_MOUSE	Strip1	STRP1_MOUSE Striatin-interacting protein 1	14	1790.13	1987.33	1857.81	2141.25	1812.26	1768.02	1961.71	2078.67	1993.63	10.7338	10.7176	10.8297	10.8112	11.8434	11.2423	10.791	11.5131	11.5179
sp|Q9EPE9|AT131_MOUSE	Atp13a1	AT131_MOUSE Probable cation-transporting ATPase 13A1	14	2311.7	2232.91	2555	2403.25	2263.71	2189.13	2449.05	2814.56	2278.13	11.1903	9.72174	12.024	9.79603	11.9432	11.2379	10.876	12.5853	10.6256
sp|P55258|RAB8A_MOUSE	Rab8a	RAB8A_MOUSE Ras-related protein Rab-8A	14	3787.03	4217.96	3402.8	4276.42	3358.42	3364.24	3728.51	3640.57	3379.74	11.9247	11.9458	10.4168	11.3389	11.5258	11.2341	10.7708	10.5891	10.254
sp|Q922D4|PP6R3_MOUSE	Ppp6r3	PP6R3_MOUSE Serine/threonine-protein phosphatase 6 regulatory subunit 3	14	2109.63	2406.42	2204.38	2557.2	2002.99	2030.95	2232.6	2320.69	2164.44	10.9965	11.2819	11.1707	11.2241	11.3793	11.2266	10.6763	11.1739	10.8707
sp|Q9DBZ5|EIF3K_MOUSE	Eif3k	EIF3K_MOUSE Eukaryotic translation initiation factor 3 subunit K	14	1112.72	1276.86	1130.86	1418.48	1029.62	1059.69	1082.01	1202.9	1147.06	11.1161	11.4729	10.9831	11.9325	11.2107	11.2266	9.91655	11.1004	11.0412
sp|Q80Y17|L2GL1_MOUSE	Llgl1	L2GL1_MOUSE Lethal(2) giant larvae protein homolog 1	14	1372.77	1465.95	1387.96	1609.92	1222.32	1291.17	1519.46	1448.65	1431.87	11.2435	10.799	11.0516	11.1032	10.9113	11.2147	11.4171	10.9599	11.2997
tr|A2AHJ7|A2AHJ7_MOUSE	Dgkz	A2AHJ7_MOUSE Diacylglycerol kinase	14	1328.49	1792.06	1500.78	1782.84	1444.38	1386.08	1266.53	1596.76	1607.32	10.1178	12.2755	11.1119	11.4335	11.9893	11.1948	8.84918	11.2333	11.7948
sp|Q9CQF9|PCYOX_MOUSE	Pcyox1	PCYOX_MOUSE Prenylcysteine oxidase	14	1467.4	1606.13	1462.43	1731.72	1339.15	1364.79	1512.07	1567.38	1454.75	11.344	11.1676	10.991	11.2729	11.2832	11.1888	10.7238	11.1926	10.836
sp|P21279|GNAQ_MOUSE	Gnaq	GNAQ_MOUSE Guanine nucleotide-binding protein G(q) subunit alpha	14	1654.79	1743.61	1636.95	1930.57	1448.86	1474.06	1641.08	1549.46	1518.25	11.8351	11.216	11.3818	11.6266	11.2939	11.1801	10.7676	10.2365	10.4625
sp|Q1HFZ0|NSUN2_MOUSE	Nsun2	NSUN2_MOUSE tRNA (cytosine(34)-C(5))-methyltransferase	14	1582.7	1685.45	1842.71	1943.81	1347.62	1550.12	1803.06	1878.25	1738.73	10.7638	10.3097	12.1835	11.1317	9.98899	11.1798	11.2496	11.7994	11.3936
sp|Q62165|DAG1_MOUSE	Dag1	DAG1_MOUSE Dystroglycan	14	2123.67	2376.9	2039.51	2441.62	2106.62	2021.29	2294.16	2416.96	2184.3	11.0714	11.1451	10.3368	10.7184	11.9698	11.1749	10.9723	11.6392	10.972
sp|P46935|NEDD4_MOUSE	Nedd4	NEDD4_MOUSE E3 ubiquitin-protein ligase NEDD4	14	1911.5	2066.81	1957.5	2209.29	1777.41	1791.03	2035.3	2067.21	1931.39	11.2388	10.9297	11.1891	10.938	11.3899	11.1673	10.9783	11.2272	10.9415
sp|P55288|CAD11_MOUSE	Cdh11	CAD11_MOUSE Cadherin-11	14	2150.95	2448.01	2069.33	2416.33	1963.18	1911.28	2132.67	1957.42	1891.98	11.8488	12.1288	11.0821	11.2083	11.7867	11.1653	10.7778	9.96023	10.0421
tr|E9Q6H8|E9Q6H8_MOUSE	Plekha5	E9Q6H8_MOUSE Protein Plekha5	14	1683.44	1824.73	1742.15	1896.78	1594.57	1597.28	1860.07	1865.59	1763.23	11.0928	10.8144	11.1603	10.5245	11.4518	11.1616	11.2444	11.3554	11.1948
sp|O08529|CAN2_MOUSE	Capn2	CAN2_MOUSE Calpain-2 catalytic subunit	14	1691.93	1946.62	1704.15	2081.14	1553.82	1613.12	1743.53	1870.74	1817.56	11.0332	11.4172	10.8037	11.4277	11.0435	11.1554	10.4306	11.2687	11.4201
sp|Q8BJH1|ZC21A_MOUSE	Zc2hc1a	ZC21A_MOUSE Zinc finger C2HC domain-containing protein 1A	14	2207.45	2605.96	2434.23	2836.38	2088.26	2196.73	2516.01	2481.59	2475.68	10.5632	11.2158	11.3243	11.429	10.8912	11.1476	11.0453	10.9692	11.4146
sp|P24547|IMDH2_MOUSE	Impdh2	IMDH2_MOUSE Inosine-5'-monophosphate dehydrogenase 2	14	2004.87	2180.3	2026.62	2370.15	1737.2	1788.26	1942.49	1914.15	1818.59	11.7766	11.5189	11.5732	11.7233	11.1217	11.1395	10.4678	10.3861	10.2928
sp|Q08509|EPS8_MOUSE	Eps8	EPS8_MOUSE Epidermal growth factor receptor kinase substrate 8	14	1326.67	1468.36	1441.46	1642.46	1302.7	1298.76	1506.84	1499.15	1436.25	10.7163	10.6678	11.3196	11.1717	11.4687	11.1253	11.1664	11.1859	11.1783
sp|Q9CXW3|CYBP_MOUSE	Cacybp	CYBP_MOUSE Calcyclin-binding protein	14	1857.52	2083.08	1829.5	2317.21	1765.45	1748.36	1992.4	1967.3	1853.33	11.1429	11.2391	10.6695	11.705	11.5427	11.1224	10.9649	10.9013	10.7122
sp|Q3TZZ7|ESYT2_MOUSE	Esyt2	ESYT2_MOUSE Extended synaptotagmin-2	14	1849.65	2152.55	2035.93	2279.32	1738.11	1827.56	2191.31	2108.18	2038.76	10.6065	11.1019	11.3499	11.006	10.8629	11.1136	11.5278	11.1669	11.2645
sp|Q5QNQ6|OSBP2_MOUSE	Osbp2	OSBP2_MOUSE Oxysterol-binding protein 2	14	2233.58	2499.88	2421.9	2676.17	2087.77	2124.01	2348.44	2469.14	2303.98	11.0174	11.0907	11.614	11.1156	11.224	11.1106	10.6272	11.2503	10.9501
sp|Q61097|KSR1_MOUSE	Ksr1	KSR1_MOUSE Kinase suppressor of Ras 1	14	1906.38	2274.17	2288.72	2575.14	1970.05	2003.12	2318.97	2374.83	2269.04	9.96849	10.6956	11.6348	11.3386	11.2275	11.1078	11.1244	11.4708	11.432
sp|Q07076|ANXA7_MOUSE	Anxa7	ANXA7_MOUSE Annexin A7	14	1100.17	1217.07	1031.18	1308.57	1011.17	1016.29	1169.52	1161.65	1132.75	11.3228	11.266	10.3175	11.3404	11.3424	11.092	11.0424	11.0436	11.2328
sp|Q8BK64|AHSA1_MOUSE	Ahsa1	AHSA1_MOUSE Activator of 90 kDa heat shock protein ATPase homolog 1	14	2047.76	2311.76	1961.99	2353.19	1855.43	1817.07	1979.89	1951.03	1861.94	11.7838	11.965	10.9762	11.4026	11.637	11.0887	10.4523	10.3708	10.3237
sp|Q921G8|GCP2_MOUSE	Tubgcp2	GCP2_MOUSE Gamma-tubulin complex component 2	14	1839.64	2037.29	1984.5	2130.99	1787.65	1758.23	1974.69	2091.66	1933.98	10.94	10.8968	11.4731	10.671	11.5865	11.0882	10.7732	11.4899	11.0815
sp|P0C605-2|KGP1_MOUSE	Prkg1	KGP1_MOUSE Isoform Beta of cGMP-dependent protein kinase 1	14	1880.42	2210.62	1888.6	2273.52	1778.2	1761.04	1964.62	1993.89	1843.67	11.1629	11.8031	10.8995	11.3647	11.505	11.0864	10.6994	10.9336	10.5454
sp|Q7TSQ8|PDPR_MOUSE	Pdpr	PDPR_MOUSE Pyruvate dehydrogenase phosphatase regulatory subunit, mitochondrial	14	2036.33	2179.74	2087.71	2339.42	1907.92	1888.5	2162.7	2167.34	2105.58	11.2546	10.8354	11.2175	10.8875	11.4928	11.0687	10.9657	11.0649	11.2128
sp|P98203|ARVC_MOUSE	Arvcf	ARVC_MOUSE Armadillo repeat protein deleted in velo-cardio-facial syndrome homolog	14	1655.58	1841.46	1717.32	1901.17	1737.76	1617.36	1851.09	1960.12	1891.53	10.6655	10.6698	10.7555	10.3132	12.2014	11.0494	10.9401	11.6642	11.741
sp|O08919|NUMBL_MOUSE	Numbl	NUMBL_MOUSE Numb-like protein	14	2417.67	2792.18	2756.9	3079.7	2289.99	2348.49	2534.19	2690.26	2646.46	10.722	11.1374	11.8863	11.5008	11.0688	11.045	10.3105	11.0208	11.3085
sp|P39054|DYN2_MOUSE	Dnm2	DYN2_MOUSE Dynamin-2	14	1851.43	2076.05	1976.08	2203.73	1743.42	1783.57	2100.08	2114.88	2033.3	10.8104	10.9027	11.2173	10.8351	11.0949	11.044	11.2495	11.4068	11.4393
sp|Q6PAK3|ANM8_MOUSE	Prmt8	ANM8_MOUSE Protein arginine N-methyltransferase 8	14	2928.73	3323.75	2948.58	3473.83	2684.54	2690	3010.66	2964.55	2971.44	11.3289	11.5637	11.0884	11.315	11.3179	11.0347	10.6839	10.5927	11.0748
sp|Q9CZN8|GATA_MOUSE	Qrsl1	GATA_MOUSE Glutamyl-tRNA(Gln) amidotransferase subunit A, mitochondrial	14	1491.48	1720.38	1523.6	1724.09	1397.81	1355.09	1535.09	1473	1377.33	11.448	11.8767	11.3692	11.1432	11.6935	11.0301	10.8095	10.4437	10.1862
sp|Q5SYD0|MYO1D_MOUSE	Myo1d	MYO1D_MOUSE Unconventional myosin-Id	14	2202.27	2263.66	1926.1	2407.21	1945.25	1907.31	2211.01	2247.79	2062.19	11.9869	11.0818	10.1921	11.0329	11.5399	11.0093	11.0405	11.3015	10.815
sp|Q8CHE4|PHLP1_MOUSE	Phlpp1	PHLP1_MOUSE PH domain leucine-rich repeat-containing protein phosphatase 1	14	1506.33	1694.22	1683.43	1802.09	1429.04	1455.44	1750.76	1726.85	1626.66	10.7183	10.8427	11.6452	10.7975	11.0825	10.9825	11.4287	11.3502	11.1523
sp|Q8BHL3|TB10B_MOUSE	Tbc1d10b	TB10B_MOUSE TBC1 domain family member 10B	14	2211.04	2414.18	2453.08	2613.58	2076.78	2121.87	2641.65	2487.4	2380.68	10.7873	10.5937	11.6352	10.7372	11.0432	10.9783	11.8237	11.21	11.1913
sp|P70265|F262_MOUSE	Pfkfb2	F262_MOUSE 6-phosphofructo-2-kinase/fructose-2,6-bisphosphatase 2	14	1575.85	1769.75	1558.87	1823.69	1544.76	1433.45	1541.39	1669.67	1554.98	11.3557	11.4702	10.9208	11.066	12.1324	10.9542	10.19	11.114	10.7966
tr|B1AWC9|B1AWC9_MOUSE	Pde4b	B1AWC9_MOUSE Protein Pde4b	14	2150.47	2721.4	2328.43	2768.34	2170.48	2098.42	2325.46	2506.47	2238.07	10.5473	12.0049	11.1024	11.4331	11.6024	10.9144	10.4635	11.3556	10.5765
sp|Q8C570|RAE1L_MOUSE	Rae1	RAE1L_MOUSE mRNA export factor	14	2206.47	2526.38	2328.22	2723.28	2107.3	2102.37	2508	2423.59	2436.36	10.7903	11.1121	11.0689	11.2142	11.2318	10.903	11.2519	10.948	11.4799
sp|Q8BP48|MAP11_MOUSE	Metap1	MAP11_MOUSE Methionine aminopeptidase 1	14	1114.67	1450.48	1351.63	1615.41	1204.55	1150.12	1091.85	1448.46	1292.32	9.94275	11.6368	11.721	12.1334	11.7104	10.8794	8.93479	11.9346	11.1069
tr|Q6P6P5|Q6P6P5_MOUSE	Slc12a6	Q6P6P5_MOUSE Protein Gm21985	14	1997.05	2273.98	2067.18	2282	1902.72	1813.11	2147.94	2046.64	1931.96	11.2875	11.5599	11.3588	10.8608	11.7211	10.8676	11.1376	10.6854	10.5213
tr|A3KFU5|A3KFU5_MOUSE	Pabpc4	A3KFU5_MOUSE Protein Pabpc4	14	1664.85	1664.75	1828.65	1932.11	1490.9	1538.45	1939.4	1922.13	1697.42	11.089	9.97304	11.8412	10.8365	10.8231	10.8668	11.8508	11.8261	10.8935
sp|Q99KE1|MAOM_MOUSE	Me2	MAOM_MOUSE NAD-dependent malic enzyme, mitochondrial	14	2160.04	2469.85	2282.31	2667.73	2118.28	2038.43	2379.18	2483	2255.02	10.8185	11.126	11.1129	11.2509	11.5632	10.8269	10.9319	11.4875	10.8823
sp|Q99MR6|SRRT_MOUSE	Srrt	SRRT_MOUSE Serrate RNA effector molecule homolog	14	2167.98	2290.84	2439.72	2697.59	1667.7	2004.18	2567.98	2520.98	2213.21	11.0432	10.4953	12.0816	11.5706	9.25858	10.8262	12.0003	11.8618	10.8624
sp|Q9Z2V5|HDAC6_MOUSE	Hdac6	HDAC6_MOUSE Histone deacetylase 6	14	1422.53	1604.8	1607.91	1721.81	1352.72	1333.62	1603.45	1529.42	1498.48	10.863	11.0223	11.9371	11.0717	11.2586	10.8	11.2333	10.7884	11.0256
sp|Q8BK67|RCC2_MOUSE	Rcc2	RCC2_MOUSE Protein RCC2	14	2299.72	2321.84	2304.32	2634.2	1865.22	2005.84	2412.44	2391.88	2360.12	11.6719	10.5989	11.3699	11.2578	10.3177	10.796	11.2327	11.2136	11.5415
sp|Q8BXZ1|TMX3_MOUSE	Tmx3	TMX3_MOUSE Protein disulfide-isomerase TMX3	14	1572.49	1633.67	1527.68	1862.56	1373.23	1365.03	1576.83	1611.98	1498.25	11.7185	10.9499	11.0678	11.6878	11.1536	10.7876	10.7803	11.0965	10.758
tr|G5E884|G5E884_MOUSE	Pak1	G5E884_MOUSE Serine/threonine-protein kinase PAK 1	14	1570.78	1808.15	1694.44	1959.29	1432.98	1457.62	1777.77	1689.97	1593.95	10.9618	11.3491	11.4958	11.5134	10.8992	10.7873	11.3816	10.894	10.7177
sp|Q6PF93|PK3C3_MOUSE	Pik3c3	PK3C3_MOUSE Phosphatidylinositol 3-kinase catalytic subunit type 3	14	1747.44	1945.45	1823.57	2049.86	1564.19	1593.14	1944.63	1909.56	1792.75	11.1546	11.1694	11.3167	11.0183	10.8824	10.7846	11.388	11.2596	11.0263
sp|Q5DTN8|JKIP3_MOUSE	Jakmip3	JKIP3_MOUSE Janus kinase and microtubule-interacting protein 3	14	1216.49	1373.17	1300.87	1492.5	1166.19	1110.33	1318.28	1289.63	1206.47	11.0745	11.2435	11.5132	11.4411	11.571	10.7193	11.0099	10.8448	10.5826
sp|Q9EPL2|CSTN1_MOUSE	Clstn1	CSTN1_MOUSE Calsyntenin-1	14	1736.71	2035.01	1852.01	2046.75	1598.05	1567.76	1840.97	1851.96	1678.18	11.196	11.7995	11.6072	11.1107	11.2283	10.7181	10.8879	11.0283	10.4241
tr|D3Z0M9|D3Z0M9_MOUSE	Ddx23	D3Z0M9_MOUSE MCG18410, isoform CRA_a	14	1232.39	1297.27	1399.24	1510.03	1230.53	1201.02	1471.9	1628.37	1443.34	10.3641	9.81235	11.4398	10.6932	11.2787	10.7111	11.3559	12.6496	11.6953
sp|Q8BWS5|GRIN3_MOUSE	Gprin3	GRIN3_MOUSE G protein-regulated inducer of neurite outgrowth 3	14	1301.01	1409.76	1421.47	1646.36	1278.78	1230.49	1566.49	1462	1414.55	10.6759	10.4047	11.3399	11.376	11.4369	10.7079	11.7927	11.0819	11.1842
sp|P58069|RASA2_MOUSE	Rasa2	RASA2_MOUSE Ras GTPase-activating protein 2	14	2173.69	2396.78	2269.15	2574.86	2017.36	1943.47	2303.11	2304.87	2140.58	11.2815	11.1882	11.4493	11.2528	11.4114	10.6966	10.9659	11.0499	10.7044
sp|Q8R5H6|WASF1_MOUSE	Wasf1	WASF1_MOUSE Wiskott-Aldrich syndrome protein family member 1	14	2262.15	2545.26	2412.84	2719.46	1947.48	1991.33	2427.8	2140.97	2222.16	11.4438	11.5809	11.8666	11.5844	10.7377	10.683	11.2674	10.0047	10.8315
sp|P05532|KIT_MOUSE	Kit	KIT_MOUSE Mast/stem cell growth factor receptor Kit	14	1395.35	1601.68	1590.11	1736.38	1323.66	1274.95	1518.07	1466.02	1318.84	11.025	11.3823	12.2143	11.5526	11.3988	10.6829	11.0039	10.6998	10.0404
sp|Q9WV55|VAPA_MOUSE	Vapa	VAPA_MOUSE Vesicle-associated membrane protein-associated protein A	14	3126.98	3380.6	3225.79	3782.34	2727.6	2750.92	3506.88	3072.09	3015.71	11.4377	11.1216	11.4708	11.6496	10.8738	10.6706	11.7678	10.3798	10.6283
sp|P33175|KIF5A_MOUSE	Kif5a	KIF5A_MOUSE Kinesin heavy chain isoform 5A	14	2336.26	2672.65	2568.75	2726.5	2142.74	2093.33	2506.64	2538.74	2288.47	11.1579	11.4806	11.9269	10.9649	11.1536	10.6023	10.9828	11.2	10.5309
sp|P25444|RS2_MOUSE	Rps2	RS2_MOUSE 40S ribosomal protein S2	14	3006.86	3192.01	2977.16	3548.18	2843.7	2667.33	3238.28	3317.03	3104.62	11.2557	10.7469	10.8345	11.1842	11.6019	10.5886	11.1208	11.4696	11.1977
sp|Q60854|SPB6_MOUSE	Serpinb6	SPB6_MOUSE Serpin B6	14	2494.7	2860.67	2445.42	2949.99	2242.99	2173.53	2587.68	2606.5	2408.72	11.4535	11.8127	10.9149	11.4046	11.2236	10.5824	10.8991	11.054	10.6553
sp|Q62383|SPT6H_MOUSE	Supt6h	SPT6H_MOUSE Transcription elongation factor SPT6	14	1945.59	2132.49	2354.47	2381.69	1894.95	1895.21	2277.77	2617.14	2360.81	10.2319	10.0867	12.0377	10.547	10.8614	10.5696	10.9894	12.7137	11.9626
sp|Q6P9Q6|FKB15_MOUSE	Fkbp15	FKB15_MOUSE FK506-binding protein 15	14	2017.23	2380.87	2306.59	2420.31	2039.08	1920.07	2454.41	2338.9	2241.75	10.4683	11.1127	11.637	10.5763	11.533	10.5667	11.6851	11.2118	11.2091
sp|Q61035|SYHC_MOUSE	Hars	SYHC_MOUSE Histidine--tRNA ligase, cytoplasmic	14	2215.52	2446.12	2349.47	2613.76	1951.27	1924.46	2387.34	2225.81	2077.89	11.4696	11.3897	11.8247	11.394	11.0097	10.5653	11.3383	10.6439	10.3647
sp|O08582|GTPB1_MOUSE	Gtpbp1	GTPB1_MOUSE GTP-binding protein 1	14	1379.4	1515.28	1487.07	1681.33	1324.74	1278.54	1639.82	1579.84	1528.96	10.7427	10.614	11.259	11.026	11.2445	10.5594	11.7161	11.3652	11.4731
sp|A2AJI0|MA7D1_MOUSE	Map7d1	MA7D1_MOUSE MAP7 domain-containing protein 1	14	1702.76	1816.47	1907.68	1998.25	1609.17	1640.7	2277.36	2178.86	2102.81	10.3225	9.90427	11.2431	10.2005	10.6322	10.5478	12.6656	12.2012	12.2827
sp|P55264|ADK_MOUSE	Adk	ADK_MOUSE Adenosine kinase	14	1807.78	2154.78	1993.41	2316.6	1683.32	1674.96	1938.6	2020.57	2034.66	10.7282	11.5012	11.5007	11.5763	10.8877	10.5411	10.5543	11.0763	11.6341
sp|Q923D5|WBP11_MOUSE	Wbp11	WBP11_MOUSE WW domain-binding protein 11	14	1289.01	1396.93	1583.59	1577.52	1214.54	1269.54	1726.98	1764.84	1566.35	10.0648	9.81033	12.0209	10.372	10.3359	10.5122	12.3708	12.729	11.7842
sp|Q8C170|MYO9A_MOUSE	Myo9a	MYO9A_MOUSE Unconventional myosin-IXa	14	1711.02	1864.29	1920.33	1992.98	1655.93	1585.09	2050.27	2008.49	1906.72	10.6992	10.4851	11.674	10.494	11.2856	10.5112	11.7617	11.6013	11.488
sp|O54916|REPS1_MOUSE	Reps1	REPS1_MOUSE RalBP1-associated Eps domain-containing protein 1	14	1901.75	2016.42	1967.74	2245.77	1719.59	1671.57	2158.74	2057.05	1914.68	11.2585	10.7367	11.3251	11.1952	11.0953	10.4943	11.7244	11.249	10.9216
sp|Q8CFI7|RPB2_MOUSE	Polr2b	RPB2_MOUSE DNA-directed RNA polymerase II subunit RPB2	14	1428.43	1594.37	1549.66	1733.88	1458.28	1359.1	1667.16	1854.68	1698.3	10.3971	10.4377	10.9657	10.6271	11.5686	10.4907	11.1325	12.4699	11.9105
sp|O70194|EIF3D_MOUSE	Eif3d	EIF3D_MOUSE Eukaryotic translation initiation factor 3 subunit D	14	1505.78	1603.45	1694.51	1811.33	1366.41	1336.87	1660.15	1636.1	1524.99	11.1282	10.6581	12.1746	11.272	11.006	10.4774	11.2557	11.169	10.8591
sp|Q80W04|TMCC2_MOUSE	Tmcc2	TMCC2_MOUSE Transmembrane and coiled-coil domains protein 2	14	1861.21	1991.52	1986.45	2204.74	1664.44	1648.31	2210.26	2040.23	1858.01	11.1418	10.7228	11.5607	11.1137	10.8597	10.4641	12.1385	11.2819	10.7169
sp|Q61481|PDE1A_MOUSE	Pde1a	PDE1A_MOUSE Calcium/calmodulin-dependent 3',5'-cyclic nucleotide phosphodiesterase 1A	14	1439.24	1699.01	1596.41	1943.47	1240.66	1262.46	1581.82	1308.27	1358.37	11.2306	11.9241	12.1105	12.7699	10.5514	10.4469	11.3237	9.42993	10.2129
sp|Q8BJW6|EIF2A_MOUSE	Eif2a	EIF2A_MOUSE Eukaryotic translation initiation factor 2A	14	1726.18	1812.01	1665.54	1920.49	1518.13	1464.18	1869.14	1816.37	1744.32	11.6062	10.9579	10.8869	10.8732	11.125	10.44	11.5294	11.2811	11.3004
sp|Q8BIL5|HOOK1_MOUSE	Hook1	HOOK1_MOUSE Protein Hook homolog 1	14	1592.87	1737.67	1653.35	1841.87	1421.25	1382.41	1705.55	1781.66	1572.76	11.3332	11.1199	11.4362	11.0349	11.0212	10.4306	11.1326	11.7095	10.7819
sp|P59016|VP33B_MOUSE	Vps33b	VP33B_MOUSE Vacuolar protein sorting-associated protein 33B	14	1610.77	1776.35	1671.7	1892.97	1457.17	1421.36	1806.46	1746.91	1722.34	11.1445	11.0539	11.2443	11.0283	10.9881	10.4287	11.4661	11.1645	11.4817
sp|Q80TR4|SLIT1_MOUSE	Slit1	SLIT1_MOUSE Slit homolog 1 protein	14	2027.78	2231.35	2213.23	2494.03	1915.63	1818.32	2392.75	2234.06	2077.46	10.9238	10.8113	11.5911	11.3134	11.2473	10.3878	11.8252	11.117	10.7831
sp|Q0GA42|CNNM1_MOUSE	Cnnm1	CNNM1_MOUSE Metal transporter CNNM1	14	1819.59	2047.61	1880.35	2196.2	1715.96	1599.58	2006.76	1940.5	1871.77	11.1344	11.2694	11.186	11.3163	11.4442	10.38	11.2654	10.9685	11.0358
sp|Q4VA53|PDS5B_MOUSE	Pds5b	PDS5B_MOUSE Sister chromatid cohesion protein PDS5 homolog B	14	1901.8	2084.96	2333.79	2400.79	1847.93	1858.9	2535.27	2618.24	2378.63	9.96273	9.82364	11.8856	10.5903	10.5508	10.3269	12.1843	12.6696	12.0061
sp|P53995|APC1_MOUSE	Anapc1	APC1_MOUSE Anaphase-promoting complex subunit 1	14	2000.99	2214.25	2066.96	2320.79	1837.43	1753.28	2210.69	2294.83	2121.38	11.1104	11.0579	11.1574	10.8508	11.1195	10.3238	11.261	11.77	11.3492
sp|Q9DBR1|XRN2_MOUSE	Xrn2	XRN2_MOUSE 5'-3' exoribonuclease 2	14	1787.2	1921.66	2071.4	2196.56	1543.24	1655.48	2327.88	2307.19	2086.14	10.4555	10.1114	11.781	10.8207	9.83993	10.2706	12.4938	12.468	11.7592
tr|Q9Z1A1|Q9Z1A1_MOUSE	Tfg	Q9Z1A1_MOUSE Protein Tfg	14	1456.28	1455.33	1363.33	1566.35	1236.23	1187.41	1631.55	1486.26	1470.87	11.8367	10.6392	10.7729	10.7205	10.9515	10.235	12.166	11.1589	11.5192
sp|Q6PFD9|NUP98_MOUSE	Nup98	NUP98_MOUSE Nuclear pore complex protein Nup98-Nup96	14	1383.07	1523.35	1547.3	1707.09	1327.78	1263.55	1468.82	1892.73	1583.44	10.5549	10.4561	11.4797	10.97	11.0439	10.2259	10.2835	13.3426	11.6432
sp|Q8BHE3|ATCAY_MOUSE	Atcay	ATCAY_MOUSE Caytaxin	14	887.848	1007.31	867.235	984.681	1175.62	803.378	995.213	1111.06	920.884	10.537	10.7523	10.006	9.84043	15.2066	10.1111	10.8357	12.1803	10.5304
sp|Q9QY81|PO210_MOUSE	Nup210	PO210_MOUSE Nuclear pore membrane glycoprotein 210	14	1500.51	1553.51	1670.38	1677.57	1302.87	1270.25	1772.99	1772.42	1563.95	11.138	10.3715	12.0539	10.4855	10.5404	9.99901	12.0735	12.1528	11.1854
sp|Q8CH09|SUGP2_MOUSE	Sugp2	SUGP2_MOUSE SURP and G-patch domain-containing protein 2	14	2441.07	2570.74	2868.12	2971.17	2324.03	2212.4	3028.53	3213.82	2951.22	10.3817	9.83347	11.8585	10.6403	10.7725	9.97819	11.8163	12.6255	12.0935
tr|F8WHT3|F8WHT3_MOUSE	Prrc2b	F8WHT3_MOUSE Protein PRRC2B	14	1330.48	1447.15	1576.42	1592.35	1277.54	1251.99	1861.52	1892.05	1693.87	9.99373	9.77673	11.5116	10.0716	10.4588	9.97287	12.8277	13.1278	12.2592
sp|Q921Q7|RIN1_MOUSE	Rin1	RIN1_MOUSE Ras and Rab interactor 1	14	1170.14	1368.89	1253.85	1448.7	1177.91	988.856	1243.89	1268.47	1182.49	11.0132	11.5879	11.4728	11.4814	12.083	9.86983	10.7404	11.028	10.7235
sp|Q8C3F2|F120C_MOUSE	Fam120c	F120C_MOUSE Constitutive coactivator of PPAR-gamma-like protein 2	14	1975.27	2199.24	2283.18	2519.68	1840.15	1735.36	2375	2407.49	2203.15	10.5822	10.597	11.8914	11.3667	10.7446	9.85912	11.6727	11.9139	11.3724
sp|P31648|SC6A1_MOUSE	Slc6a1	SC6A1_MOUSE Sodium- and chloride-dependent GABA transporter 1	14	1148.19	1492.08	1269.74	1549.19	1332.9	1015.65	1339.49	1252.07	1280.69	10.2716	12.0054	11.043	11.6699	12.996	9.63538	10.9932	10.3465	11.039
tr|E9PV24|E9PV24_MOUSE	Fga	E9PV24_MOUSE Protein Fga	14	1295.61	1578	1161.43	1314.74	1055.12	1794.39	1766.56	4072.1	6676.63	6.53715	7.16114	5.6971	5.5859	5.80234	9.60133	8.17718	18.979	32.4588
sp|P97861|KRT86_MOUSE	Krt86	KRT86_MOUSE Keratin, type II cuticular Hb6	13	339.114	1772.97	694.73	668.295	925.653	6367.45	578.774	537.884	4755.52	2.04987	9.63927	4.08267	3.40165	6.09841	40.8176	3.20961	3.00339	27.6975
sp|Q61765|K1H1_MOUSE	Krt31	K1H1_MOUSE Keratin, type I cuticular Ha1	13	179.692	1014.34	429.467	368.983	529.897	3723.39	375.092	338.94	3340.11	1.75793	8.92519	4.0846	3.03962	5.65004	38.6289	3.36645	3.06293	31.4844
sp|O88322|NID2_MOUSE	Nid2	NID2_MOUSE Nidogen-2	13	1027.73	1408.26	1081.62	1188.46	989.398	1221.71	1056.26	1375.85	1234.05	10.1259	12.4795	10.3604	9.86005	10.6246	12.7651	9.54744	12.5218	11.7152
sp|Q0GNC1|INF2_MOUSE	Inf2	INF2_MOUSE Inverted formin-2	13	2572.39	2478.7	2434.84	2799.99	2214.1	2681.52	2680.99	2553.43	2934.38	11.469	9.93974	10.5538	10.512	10.7591	12.6786	10.966	10.5161	12.6057
sp|P26516|PSMD7_MOUSE	Psmd7	PSMD7_MOUSE 26S proteasome non-ATPase regulatory subunit 7	13	2561.36	2296.31	2284.97	2482.15	2264.32	2366.78	2241.66	2450.67	1897.36	12.7657	10.2936	11.0714	10.417	12.2998	12.5093	10.2496	11.2824	9.11141
sp|P47791|GSHR_MOUSE	Gsr	GSHR_MOUSE Glutathione reductase, mitochondrial	13	1662.46	1664.66	1500.17	1792.52	1439.51	1571.19	1429.77	1531.32	1406.32	12.3659	11.1369	10.8483	11.2274	11.6702	12.3938	9.75671	10.5216	10.0791
sp|Q80TS7|DEND_MOUSE	Ddn	DEND_MOUSE Dendrin	13	793.899	955.358	867.745	1049.89	760.535	912.722	947.201	1021.68	961.749	10.0277	10.8534	10.6555	11.1666	10.4699	12.2258	10.9759	11.9205	11.7047
sp|P60487|PLPP_MOUSE	Pdxp	PLPP_MOUSE Pyridoxal phosphate phosphatase	13	1360.9	1603.35	1328.88	1614.13	1543.2	1451.28	1362.7	1568.26	1433.54	10.6695	11.3059	10.1286	10.656	13.1864	12.0661	9.80118	11.3573	10.829
sp|Q2PZL6|FAT4_MOUSE	Fat4	FAT4_MOUSE Protocadherin Fat 4	13	1477.87	1574.75	1451.23	1624.86	1326.39	1493.18	1604.53	1652.23	1579.42	11.177	10.7118	10.6702	10.3477	10.9332	11.9757	11.1326	11.5425	11.5093
sp|Q61220|NELL2_MOUSE	Nell2	NELL2_MOUSE Protein kinase C-binding protein NELL2	13	1196.67	1251.22	1188.96	1348.7	1016.6	1172.84	1243.72	1252.55	1222.52	11.4609	10.7781	11.0703	10.8768	10.6117	11.912	10.9277	11.0811	11.2814
sp|Q9Z1S3|GRP1_MOUSE	Rasgrp1	GRP1_MOUSE RAS guanyl-releasing protein 1	13	1742.4	1815.54	1749.44	1889.48	1562.09	1724.46	1771.35	1847.79	1900.86	11.3424	10.6298	11.0714	10.3571	11.0828	11.9045	10.5785	11.1109	11.9226
sp|Q8BLN6|UNC80_MOUSE	Unc80	UNC80_MOUSE Protein unc-80 homolog	13	1263.04	1325.44	1445.55	1531.39	1146.09	1338.01	1523.27	1499.44	1404.56	10.5659	9.97267	11.7563	10.7874	10.4495	11.87	11.6904	11.5867	11.3212
sp|Q9JJV2|PROF2_MOUSE	Pfn2	PROF2_MOUSE Profilin-2	13	2776.14	3038.73	2262.44	2888.45	2149.38	2452.36	2614.51	2289.16	2439.03	12.6491	12.4529	10.0217	11.0821	10.6738	11.8495	10.9287	9.63461	10.7077
tr|F8VQC9|F8VQC9_MOUSE	Slc4a7	F8VQC9_MOUSE NBCn1-G	13	2461.67	2727.82	2603.02	2876.84	2194.2	2511.47	2800.99	2705.33	2618.46	10.9337	10.8972	11.2399	10.7595	10.6218	11.8295	11.4133	11.0994	11.2058
sp|P97494|GSH1_MOUSE	Gclc	GSH1_MOUSE Glutamate--cysteine ligase catalytic subunit	13	1157.03	1377.37	1285.55	1451.54	1159.27	1210.5	1196.95	1283.39	1215.42	10.6445	11.397	11.4978	11.2447	11.6239	11.8098	10.1022	10.9063	10.7738
sp|P97492|RGS14_MOUSE	Rgs14	RGS14_MOUSE Regulator of G-protein signaling 14	13	1291.31	1475.2	1306.92	1398.59	1244.47	1268.07	1359.65	1289.42	1233.11	11.3332	11.6449	11.1511	10.336	11.904	11.8023	10.9474	10.4534	10.4276
sp|O88958|GNPI1_MOUSE	Gnpda1	GNPI1_MOUSE Glucosamine-6-phosphate isomerase 1	13	2029.23	2199.98	1853.4	2280.8	1817.53	1926.17	2006.05	2065.49	1900.54	11.707	11.4155	10.3952	11.0801	11.4284	11.7845	10.6174	11.0073	10.5646
sp|Q8BX10|PGAM5_MOUSE	Pgam5	PGAM5_MOUSE Serine/threonine-protein phosphatase PGAM5, mitochondrial	13	1672.96	1848.06	1891.1	2172.13	1550.39	1756.43	1924.02	1891.37	1845.68	10.5578	10.4898	11.6025	11.5429	10.6639	11.755	11.1394	11.0257	11.223
sp|P70698|PYRG1_MOUSE	Ctps1	PYRG1_MOUSE CTP synthase 1	13	1786.4	2016.16	1919.62	2162.92	1735.2	1847.02	1954.71	2074.68	1918.25	10.7001	10.8616	11.1782	10.9091	11.3278	11.7323	10.7412	11.4789	11.0707
tr|H3BKQ3|H3BKQ3_MOUSE	Evi5l	H3BKQ3_MOUSE Protein Evi5l	13	1736.36	1960.26	1810.33	2069.06	1561.3	1722.22	1834.97	1835.58	1745.46	11.1373	11.3088	11.2887	11.1751	10.9148	11.7147	10.7977	10.8756	10.7873
sp|Q9QZF2|GPC1_MOUSE	Gpc1	GPC1_MOUSE Glypican-1	13	1391.69	1794.7	1606.91	1891.11	1498.89	1519.09	1420.16	1607.42	1623.71	10.1161	11.7333	11.3555	11.5751	11.8748	11.7099	9.47037	10.7929	11.372
sp|Q6DFV7|NCOA7_MOUSE	Ncoa7	NCOA7_MOUSE Nuclear receptor coactivator 7	13	1857.18	2123.57	2089.75	2275.55	1777.77	1940.29	2206.52	2134.02	1978.13	10.5452	10.845	11.5356	10.8799	11.0018	11.6834	11.494	11.1928	10.8222
sp|Q80VP1|EPN1_MOUSE	Epn1	EPN1_MOUSE Epsin-1	13	1574.79	1724.61	1729.43	1977.79	1096.72	1581.56	2044.75	1605.12	1728.05	10.9598	10.7953	11.7012	11.5905	8.31887	11.6726	13.0552	10.3188	11.5878
sp|Q9WV60|GSK3B_MOUSE	Gsk3b	GSK3B_MOUSE Glycogen synthase kinase-3 beta	13	1631.54	2063.95	1705.81	2123.56	1564.52	1677.24	1615.4	1761.9	1783.63	10.7012	12.1758	10.8771	11.7284	11.1842	11.6663	9.72025	10.6748	11.272
sp|Q80YE7|DAPK1_MOUSE	Dapk1	DAPK1_MOUSE Death-associated protein kinase 1	13	1024.52	1136.88	1076.11	1288.41	967.537	1043.13	1099.74	1144.07	1123.2	10.7994	10.7784	11.0277	11.436	11.1156	11.6605	10.6349	11.1397	11.4077
sp|Q9JKF1|IQGA1_MOUSE	Iqgap1	IQGA1_MOUSE Ras GTPase-activating-like protein IQGAP1	13	1328.04	1623.45	1619.79	1506	1291.99	1522.44	1760.25	1977.6	1853.52	9.56717	10.5189	11.3443	9.13559	10.1442	11.6309	11.6334	13.1599	12.8656
sp|P12849|KAP1_MOUSE	Prkar1b	KAP1_MOUSE cAMP-dependent protein kinase type I-beta regulatory subunit	13	1067.27	1322.96	1161.39	1398.99	1090.7	1153.25	1213.98	1367.45	1224.62	10.1328	11.297	10.7196	11.1843	11.2862	11.6113	10.5737	11.9925	11.2026
sp|Q9DB41|GHC2_MOUSE	Slc25a18	GHC2_MOUSE Mitochondrial glutamate carrier 2	13	1251.36	1454.65	1416.18	1662.97	1296.47	1307.25	1303.92	1428.17	1347.08	10.4721	10.9489	11.5217	11.7185	11.8249	11.6014	10.0106	11.04	10.8619
sp|Q9WUA6|AKT3_MOUSE	Akt3	AKT3_MOUSE RAC-gamma serine/threonine-protein kinase	13	1453.1	1553.71	1455.57	1669.25	1219.45	1361.99	1548.18	1408.54	1373.36	11.6347	11.189	11.3303	11.2544	10.6417	11.5647	11.3722	10.4177	10.5952
sp|Q71M36|CSPG5_MOUSE	Cspg5	CSPG5_MOUSE Chondroitin sulfate proteoglycan 5	13	1428.84	1754.12	1532.58	1841.74	1219.58	1419.31	1565.17	1384.39	1489.52	10.9645	12.1067	11.4334	11.9007	10.2	11.55	11.0186	9.81304	11.0132
sp|Q8K274|KT3K_MOUSE	Fn3krp	KT3K_MOUSE Ketosamine-3-kinase	13	1369.2	1494.96	1305.3	1561.42	1261.72	1266.06	1266.49	1343.96	1270.91	11.7596	11.5483	10.8989	11.2924	11.8107	11.5314	9.97906	10.6624	10.5173
sp|Q6PE13|PRRT3_MOUSE	Prrt3	PRRT3_MOUSE Proline-rich transmembrane protein 3	13	1304.82	1528.59	1383.87	1594.46	1250.76	1305.82	1427.81	1402.33	1352.19	10.852	11.4344	11.1893	11.1664	11.3376	11.5171	10.8941	10.7734	10.8358
sp|Q3ULF4|SPG7_MOUSE	Spg7	SPG7_MOUSE Paraplegin	13	2205.96	2398.08	2413.67	2691.48	2224.91	2245.99	2512.74	2515.28	2398.36	10.6455	10.4086	11.3238	10.937	11.7022	11.4942	11.1244	11.2123	11.1518
sp|Q9WV18|GABR1_MOUSE	Gabbr1	GABR1_MOUSE Gamma-aminobutyric acid type B receptor subunit 1	13	1798.46	1960.77	1885.52	2139.97	1610.61	1771.78	2027.13	1974.95	1911.53	10.9949	10.7815	11.2065	11.0164	10.7317	11.4869	11.3693	11.1529	11.2599
sp|Q3U214|MAST3_MOUSE	Mast3	MAST3_MOUSE Microtubule-associated serine/threonine-protein kinase 3	13	1245.3	1458.64	1399.36	1600.2	1206.75	1336.14	1551.84	1607.33	1506.31	10.0777	10.6168	11.0093	10.9043	10.6436	11.4667	11.5211	12.0152	11.7452
sp|Q8BW96|KCC1D_MOUSE	Camk1d	KCC1D_MOUSE Calcium/calmodulin-dependent protein kinase type 1D	13	1393.98	1488.45	1371.32	1576.95	1124.67	1274.15	1492.1	1290	1314	11.8161	11.3479	11.3007	11.2558	10.3904	11.4535	11.6032	10.1006	10.7319
sp|P36993|PPM1B_MOUSE	Ppm1b	PPM1B_MOUSE Protein phosphatase 1B	13	2104.3	2384.18	2198.6	2480.04	1887.44	2105.17	2520.17	2443.7	2244.44	10.7935	10.9991	10.9635	10.7116	10.5516	11.451	11.859	11.5783	11.0924
sp|P63323|RS12_MOUSE	Rps12	RS12_MOUSE 40S ribosomal protein S12	13	1403.93	1609.31	1342.02	1801.18	1354.93	1347.02	1228.95	1497.27	1447.35	11.2467	11.5953	10.4517	12.15	11.83	11.4434	9.03183	11.0795	11.1716
sp|Q9WV80|SNX1_MOUSE	Snx1	SNX1_MOUSE Sorting nexin-1	13	1854.46	2117.04	1890.46	2251.37	1665.61	1806.06	2099.55	1944.29	1912.92	11.0463	11.342	10.9474	11.2924	10.8133	11.4086	11.4732	10.698	10.9789
sp|Q9CZR8|EFTS_MOUSE	Tsfm	EFTS_MOUSE Elongation factor Ts, mitochondrial	13	1346.64	1639.79	1458.12	1867.28	1432.06	1379.55	1308.55	1574.54	1394.52	10.493	11.492	11.0455	12.2517	12.1617	11.3995	9.35402	11.3329	10.4697
sp|O35099|M3K5_MOUSE	Map3k5	M3K5_MOUSE Mitogen-activated protein kinase kinase kinase 5	13	1464.4	1612.54	1594.65	1754.3	1307.81	1439.77	1665.04	1599.01	1552.27	10.9327	10.8278	11.5739	11.0284	10.6414	11.3989	11.4039	11.0271	11.166
sp|Q9D6Y9|GLGB_MOUSE	Gbe1	GLGB_MOUSE 1,4-alpha-glucan-branching enzyme	13	1742.11	2043.36	1760.39	2105.52	1569.03	1696.73	1752.68	1997.74	1841.93	11.0248	11.6306	10.8305	11.22	10.8221	11.387	10.1756	11.6782	11.2313
sp|Q99LR1|ABD12_MOUSE	Abhd12	ABD12_MOUSE Monoacylglycerol lipase ABHD12	13	1415	1499.38	1449.95	1610.76	1254.36	1371.61	1617.11	1595.04	1551.31	11.0522	10.5333	11.0101	10.5941	10.6783	11.3612	11.5876	11.5082	11.6749
sp|Q3TIR3|RIC8A_MOUSE	Ric8a	RIC8A_MOUSE Synembryn-A	13	1122.13	1219.97	1121.55	1299.97	1023.76	1068.29	1227.78	1201.38	1128.59	11.2476	10.9983	10.929	10.9721	11.1841	11.3555	11.2901	11.1234	10.8997
sp|P61514|RL37A_MOUSE	Rpl37a	RL37A_MOUSE 60S ribosomal protein L37a	13	1723.26	1893.93	1844.77	2143.99	1676.38	1694.96	1777.79	1852.27	1914.77	10.8813	10.7561	11.3245	11.3997	11.5369	11.3498	10.2984	10.8038	11.6495
sp|Q8VDK1|NIT1_MOUSE	Nit1	NIT1_MOUSE Nitrilase homolog 1	13	1461.37	1853.64	1532.88	1900.41	1451.49	1462.21	1389.05	1662.1	1558.55	10.6958	12.2023	10.9071	11.7123	11.5786	11.3492	9.32681	11.237	10.991
sp|Q5U458|DJC11_MOUSE	Dnajc11	DJC11_MOUSE DnaJ homolog subfamily C member 11	13	2171.83	2346.82	2180.95	2546.29	1902.63	2058.61	2425.04	2215.25	2279.24	11.27	10.9532	11.0025	11.1262	10.7607	11.3285	11.5446	10.6185	11.3959
sp|Q8R4N0|CLYBL_MOUSE	Clybl	CLYBL_MOUSE Citrate lyase subunit beta-like protein, mitochondrial	13	2284.92	2596.49	2254.8	2754.93	1998.14	2074.29	2182.69	2127.84	2089.9	11.7228	11.9814	11.2464	11.9018	11.1731	11.2858	10.2734	10.0842	10.3311
sp|P34152|FAK1_MOUSE	Ptk2	FAK1_MOUSE Focal adhesion kinase 1	13	1067.12	1203.68	1107.74	1213.7	987.683	1035.52	1172.81	1204.13	1172.91	10.9542	11.1132	11.0549	10.4911	11.0503	11.2727	11.0448	11.4178	11.601
sp|Q80UW2|FBX2_MOUSE	Fbxo2	FBX2_MOUSE F-box only protein 2	13	2045.99	2383.08	1664.51	2316.93	2277.73	1892.11	1934.52	2102.04	1912.28	11.4901	12.037	9.08768	10.9565	13.9415	11.2685	9.96678	10.9044	10.3475
sp|Q3UKC1|TAXB1_MOUSE	Tax1bp1	TAXB1_MOUSE Tax1-binding protein 1 homolog	13	1699.51	1969.2	1636.72	1987.93	1598.72	1591.43	1701.99	1762.68	1695.75	11.3381	11.8159	10.6154	11.1675	11.6245	11.2591	10.4168	10.8625	10.9003
sp|P51660|DHB4_MOUSE	Hsd17b4	DHB4_MOUSE Peroxisomal multifunctional enzyme type 2	13	1373.65	1504.31	1430.11	1645.28	1279.28	1308.54	1455.44	1477.09	1393.23	11.144	10.9765	11.2792	11.2394	11.3114	11.2577	10.8323	11.0691	10.8905
sp|Q9CQR2|RS21_MOUSE	Rps21	RS21_MOUSE 40S ribosomal protein S21	13	1573.51	1617.58	1291.66	1716.65	1418.21	1347.4	1479.68	1419.67	1369.88	12.3967	11.4621	9.89308	11.3883	12.1777	11.2573	10.6946	10.3315	10.3987
sp|O54781|SRPK2_MOUSE	Srpk2	SRPK2_MOUSE SRSF protein kinase 2	13	1909.97	2163.24	2140.91	2403.47	1628.24	1879.25	2175.57	2112.24	2108.46	10.7866	10.9881	11.7545	11.4297	10.0222	11.2549	11.2718	11.019	11.4732
sp|P70211|DCC_MOUSE	Dcc	DCC_MOUSE Netrin receptor DCC	13	1073.04	1263.97	1192.45	1330.46	988.462	1039.86	1190.34	1087.84	1074.18	10.9478	11.5987	11.8276	11.4302	10.9915	11.2509	11.1415	10.2522	10.5597
sp|Q91XU3|PI42C_MOUSE	Pip4k2c	PI42C_MOUSE Phosphatidylinositol 5-phosphate 4-kinase type-2 gamma	13	2263.75	2462.48	2177.57	2660.8	1867.06	2037.93	2354.82	2190.79	2098.05	11.7673	11.5128	11.0044	11.6466	10.5777	11.2341	11.2297	10.5194	10.5081
tr|F8WIZ7|F8WIZ7_MOUSE	Osbpl6	F8WIZ7_MOUSE Oxysterol-binding protein	13	2146.52	2431.39	2435.57	2670.48	2342.08	2182.59	2331.37	2545.15	2395.64	10.4123	10.6079	11.4858	10.9079	12.3823	11.2276	10.375	11.4043	11.1969
sp|Q8BFQ4|WDR82_MOUSE	Wdr82	WDR82_MOUSE WD repeat-containing protein 82	13	3123.11	3387.15	3056.48	3697.52	2827.86	2898.28	3262.93	3300.63	3061.34	11.3973	11.1176	10.8439	11.3623	11.2476	11.2165	10.9241	11.1264	10.7644
sp|P47754|CAZA2_MOUSE	Capza2	CAZA2_MOUSE F-actin-capping protein subunit alpha-2	13	1349.36	1663.26	1419.41	1736.16	1329.54	1289.61	1212.2	1396.68	1341.69	11.0614	12.2632	11.3119	11.9843	11.8787	11.2109	9.11628	10.576	10.5973
sp|Q3UHD6|SNX27_MOUSE	Snx27	SNX27_MOUSE Sorting nexin-27	13	2358.7	2601.57	2154.94	2812.65	2075.08	2176.65	2244.8	2592.23	2495.86	11.4552	11.3639	10.1745	11.5023	10.9838	11.2104	10.0016	11.6291	11.6792
tr|E9PXF0|E9PXF0_MOUSE	Pcdh17	E9PXF0_MOUSE Protein Pcdh17	13	1236.05	1484.96	1438.9	1675.27	1219.74	1246.67	1281.79	1394.35	1416.98	10.4204	11.2596	11.793	11.8925	11.2073	11.1455	9.91347	10.8583	11.5099
sp|Q8R570|SNP47_MOUSE	Snap47	SNP47_MOUSE Synaptosomal-associated protein 47	13	2022.81	2149.28	1954	2357.7	1829.39	1826.29	2048.93	1967.06	1987.8	11.6364	11.1203	10.9279	11.4207	11.4698	11.1413	10.8132	10.4526	11.0179
sp|Q9CZX0|ELP3_MOUSE	Elp3	ELP3_MOUSE Elongator complex protein 3	13	1423.47	1639.1	1575.96	1862.53	1412.3	1440.9	1580.68	1789.6	1612.25	10.3735	10.7435	11.1653	11.4293	11.2174	11.1356	10.5678	12.0469	11.3207
sp|O35495|CDK14_MOUSE	Cdk14	CDK14_MOUSE Cyclin-dependent kinase 14	13	1897.5	2102.5	1665.12	2211.77	1657.88	1713.71	1969.75	1960.49	1887.14	11.6195	11.5798	9.91282	11.4047	11.0648	11.1287	11.0657	11.0895	11.1345
tr|Q7TMC8|Q7TMC8_MOUSE	Fuk	Q7TMC8_MOUSE L-fucose kinase	13	1324.58	1453.51	1410	1551.21	1203.95	1254.94	1468.61	1488.88	1366.27	11.0465	10.9025	11.4317	10.8932	10.9431	11.0987	11.2361	11.4696	10.9786
sp|Q9DBS5|KLC4_MOUSE	Klc4	KLC4_MOUSE Kinesin light chain 4	13	1646.09	1968.53	1713.57	2007.18	1531.78	1559.76	1719.4	1805.03	1654.28	11.0218	11.855	11.1544	11.3168	11.1784	11.0753	10.5617	11.1641	10.6725
sp|O70443|GNAZ_MOUSE	Gnaz	GNAZ_MOUSE Guanine nucleotide-binding protein G(z) subunit alpha	13	2211.13	2641.87	2308.1	2808.7	2174.58	2104.71	2200.04	2394.26	2216.41	10.9658	11.7842	11.1283	11.7293	11.7541	11.0693	10.0097	10.9683	10.591
sp|Q5KU39|VPS41_MOUSE	Vps41	VPS41_MOUSE Vacuolar protein sorting-associated protein 41 homolog	13	1712.83	1918.36	1764.11	1982.58	1567.05	1604.85	1874.06	1839.67	1790.48	11.1394	11.2212	11.1537	10.8572	11.1075	11.0683	11.1813	11.0517	11.2196
sp|Q3UFT3|GAREM_MOUSE	Garem	GAREM_MOUSE GRB2-associated and regulator of MAPK protein	13	1242.85	1385.82	1331.65	1458.32	1204.3	1191.63	1422.55	1374.57	1305.12	10.8827	10.9141	11.3359	10.7525	11.4932	11.0652	11.4274	11.118	11.0111
sp|Q91XL9|OSBL1_MOUSE	Osbpl1a	OSBL1_MOUSE Oxysterol-binding protein-related protein 1	13	1292.41	1477.69	1351.71	1549.53	1115.21	1219.64	1472.58	1441.57	1309.23	11.0526	11.366	11.2381	11.1584	10.3946	11.0611	11.5533	11.3878	10.788
sp|Q9R1P0|PSA4_MOUSE	Psma4	PSA4_MOUSE Proteasome subunit alpha type-4	13	2101.91	2284.17	1962.03	2386.91	1861.4	1809.33	1870.1	1984.11	1867.91	12.1013	11.8279	10.9817	11.5716	11.68	11.0468	9.8774	10.5517	10.3618
sp|Q6ZQA6|IGSF3_MOUSE	Igsf3	IGSF3_MOUSE Immunoglobulin superfamily member 3	13	1319.17	1433.16	1266.4	1535.11	1243.97	1193.23	1255.16	1425.96	1286.86	11.5093	11.2461	10.7415	11.2779	11.8289	11.0401	10.0463	11.492	10.8178
sp|Q9Z2Y8|PROSC_MOUSE	Prosc	PROSC_MOUSE Proline synthase co-transcribed bacterial homolog protein	13	2268.75	2436.74	2002.15	2540.32	1989.7	1978	2294.66	2152.64	2185.01	11.9339	11.5283	10.2385	11.2518	11.407	11.0337	11.0732	10.4594	11.0741
sp|Q9WVK8|CP46A_MOUSE	Cyp46a1	CP46A_MOUSE Cholesterol 24-hydroxylase	13	963.384	1038.01	1010.24	1142.67	899.451	913.667	1075.56	1088.34	1039.97	10.9667	10.6277	11.1802	10.9531	11.1594	11.0297	11.2324	11.4441	11.4067
sp|Q6ZQ29-2|TAOK2_MOUSE	Taok2	TAOK2_MOUSE Isoform 2 of Serine/threonine-protein kinase TAO2	13	1405.75	1540.69	1605.81	1738.03	1330.58	1399.79	1718.46	1671.23	1657.38	10.4377	10.289	11.5915	10.8666	10.7678	11.022	11.7057	11.4624	11.8572
sp|Q8BWT5|DIP2A_MOUSE	Dip2a	DIP2A_MOUSE Disco-interacting protein 2 homolog A	13	1788.56	2040.1	1972.26	2228.34	1888.88	1729.71	1817.71	2007.29	1881.45	10.7455	11.0239	11.5195	11.2731	12.3684	11.0203	10.0186	11.1397	10.8912
sp|Q9QZS3|NUMB_MOUSE	Numb	NUMB_MOUSE Protein numb homolog	13	1664.19	1849.29	1731.67	1964.12	1506.2	1561.93	1885.58	1870.48	1723.92	11.0346	11.0286	11.1626	10.9663	10.8849	10.9829	11.4699	11.4564	11.0137
sp|Q78IK4|APOOL_MOUSE	Apool	APOOL_MOUSE Apolipoprotein O-like	13	2236.83	2382.69	2184.81	2463.29	1966.9	1978.18	2358.46	2249.36	2143.24	11.6951	11.2047	11.1054	10.8449	11.2083	10.9683	11.3126	10.8636	10.797
tr|E9PV26|E9PV26_MOUSE	BC068157	E9PV26_MOUSE Protein BC068157	13	854.7	997.363	1091.22	1098.39	716.67	872.61	1092.35	1056.52	1060.69	10.1219	10.6234	12.5634	10.9533	9.2503	10.959	11.8679	11.5576	12.1032
sp|Q9WU40|MAN1_MOUSE	Lemd3	MAN1_MOUSE Inner nuclear membrane protein Man1	13	1129.01	1262.85	1322.76	1480.49	1127.54	1159.41	1317.35	1516.69	1410.68	10.0583	10.1191	11.4566	11.1064	10.9483	10.9538	10.7669	12.4815	12.1093
sp|Q8C6G8|WDR26_MOUSE	Wdr26	WDR26_MOUSE WD repeat-containing protein 26	13	1771.58	1907.74	1824.19	1949.84	1914.39	1611.79	1628.49	2006.48	1629.87	11.3444	10.9876	11.3563	10.5138	13.361	10.9454	9.56681	11.8685	10.0562
sp|Q8BH44|COR2B_MOUSE	Coro2b	COR2B_MOUSE Coronin-2B	13	2168.12	2480.29	2122.92	2570.4	1955.03	1908.7	2080.35	2032.15	2011.56	11.7158	12.0546	11.1524	11.6958	11.5141	10.9377	10.313	10.1434	10.4733
sp|Q3UJB9|EDC4_MOUSE	Edc4	EDC4_MOUSE Enhancer of mRNA-decapping protein 4	13	1465.59	1626.38	1608.26	1815.02	1364.97	1422.15	1747.62	1751.23	1636.75	10.6094	10.5892	11.3183	11.0637	10.7693	10.9175	11.6061	11.7102	11.4162
tr|G5E895|G5E895_MOUSE	Akr1b10	G5E895_MOUSE MCG142264, isoform CRA_b	13	1958.22	2334.19	2053.59	2494.72	1818.37	1822.87	1907.21	2104.08	2046.37	11.0417	11.8379	11.2573	11.8451	11.1749	10.9001	9.86587	10.9592	11.1179
sp|Q7TSH2|KPBB_MOUSE	Phkb	KPBB_MOUSE Phosphorylase b kinase regulatory subunit beta	13	1824.21	2047.2	1942.55	2217.34	1673.94	1721.72	2043.1	2041.41	1996.48	10.8875	10.9894	11.2712	11.1436	10.8888	10.8972	11.1868	11.2545	11.481
sp|Q9D5T0|ATAD1_MOUSE	Atad1	ATAD1_MOUSE ATPase family AAA domain-containing protein 1	13	2010.11	2286.42	2039.93	2448.74	1873.86	1853.82	2184.6	2100.38	2051.26	11.1421	11.3989	10.9928	11.4295	11.3206	10.8972	11.1091	10.7544	10.9554
sp|Q80T41|GABR2_MOUSE	Gabbr2	GABR2_MOUSE Gamma-aminobutyric acid type B receptor subunit 2	13	1766.29	1958.73	1842.46	2133.31	1642.3	1611.8	1897.39	1800.63	1740.73	11.2531	11.224	11.4119	11.4447	11.4038	10.8899	11.09	10.5969	10.6857
sp|Q8K224|NAT10_MOUSE	Nat10	NAT10_MOUSE N-acetyltransferase 10	13	1277.4	1262.22	1355.13	1415.99	1358.03	1216.92	1411.63	1692.93	1355.7	10.7723	9.57369	11.1099	10.055	12.4819	10.8829	10.9211	13.1875	11.0156
sp|Q91X97|NCALD_MOUSE	Ncald	NCALD_MOUSE Neurocalcin-delta	13	1625.16	1884.94	2004.94	2268.35	1509.33	1671.37	1847.04	2101.87	2147.08	9.96909	10.3996	11.9566	11.7168	10.0909	10.8726	10.3943	11.9098	12.6902
sp|Q6Y685|TACC1_MOUSE	Tacc1	TACC1_MOUSE Transforming acidic coiled-coil-containing protein 1	13	1472.09	1650.39	1474.19	1731.64	1292.57	1345.02	1644.14	1595.72	1509.15	11.2207	11.3145	10.9241	11.1144	10.7381	10.8722	11.4971	11.2353	11.0836
sp|Q7M6Y3|PICAL_MOUSE	Picalm	PICAL_MOUSE Phosphatidylinositol-binding clathrin assembly protein	13	1786.72	1891.24	1697.01	2017.54	1519.21	1557.34	1875.87	1830.72	1705.84	11.7552	11.1914	10.8544	11.1773	10.8938	10.8657	11.3224	11.126	10.8137
sp|P07758|A1AT1_MOUSE	Serpina1a	A1AT1_MOUSE Alpha-1-antitrypsin 1-1	13	2256.31	2155.58	1588.76	2055.82	1563.24	1727.58	2006.58	2250.86	2017.67	13.3742	11.4919	9.1553	10.2611	10.0991	10.8594	10.9115	12.3242	11.5234
sp|O35435|PYRD_MOUSE	Dhodh	PYRD_MOUSE Dihydroorotate dehydrogenase (quinone), mitochondrial	13	1394.06	1478.55	1438.28	1704.73	1223.94	1251.75	1518.02	1405.18	1368.71	11.4001	10.8749	11.4345	11.7388	10.9087	10.8554	11.3885	10.6145	10.7845
sp|Q9JIG7|CCD22_MOUSE	Ccdc22	CCD22_MOUSE Coiled-coil domain-containing protein 22	13	2004.66	2184.66	1986.37	2312.37	1765.13	1794.19	2234.57	2062.83	1977.5	11.4322	11.2056	11.0128	11.1042	10.9712	10.8507	11.6908	10.8666	10.866
sp|Q8C7X2|EMC1_MOUSE	Emc1	EMC1_MOUSE ER membrane protein complex subunit 1	13	1632.73	1799.54	1781.75	2008.91	1430.91	1505.55	1815.42	1709.71	1725.02	11.0783	10.982	11.7531	11.4778	10.5818	10.8332	11.3005	10.7158	11.2776
sp|Q61140|BCAR1_MOUSE	Bcar1	BCAR1_MOUSE Breast cancer anti-estrogen resistance protein 1	13	1285.29	1328.12	1151.91	1346.48	1078.5	1085.85	1332.12	1247.52	1244.02	12.0871	11.2336	10.5314	10.6625	11.0542	10.8291	11.4928	10.837	11.2722
sp|Q80Y98|DDHD2_MOUSE	Ddhd2	DDHD2_MOUSE Phospholipase DDHD2	13	1158.18	1300.57	1176.81	1336.97	1095.58	1032.67	1231.88	1161.07	1071.18	11.4425	11.5569	11.3031	11.1226	11.7971	10.8195	11.1654	10.5961	10.1969
tr|A2ACM0|A2ACM0_MOUSE	Rptor	A2ACM0_MOUSE Regulatory-associated protein of mTOR	13	2035.62	2277.18	2264.77	2502.65	1846.66	1891.97	2288.45	2187.21	2092.67	10.9748	11.0423	11.8706	11.3616	10.8511	10.8172	11.3189	10.8926	10.8708
sp|Q9CRC8|LRC40_MOUSE	Lrrc40	LRC40_MOUSE Leucine-rich repeat-containing protein 40	13	2355.04	2521.85	2368.36	2707.58	2160.03	2076.67	2480.47	2411.12	2195.41	11.5555	11.1294	11.2976	11.1869	11.5515	10.8058	11.1657	10.9283	10.3793
sp|P28741|KIF3A_MOUSE	Kif3a	KIF3A_MOUSE Kinesin-like protein KIF3A	13	1857.63	2052.13	2094.02	2273.98	1616.78	1753.01	2237.86	2069.62	2050.66	10.7903	10.7211	11.825	11.1225	10.2356	10.7984	11.9253	11.1047	11.4771
sp|Q80TQ2|CYLD_MOUSE	Cyld	CYLD_MOUSE Ubiquitin carboxyl-terminal hydrolase CYLD	13	1818.81	2022.02	1881.61	2044.5	1733.43	1619.94	1877.97	1914.23	1689.46	11.4287	11.4277	11.4944	10.8178	11.8715	10.7947	10.8258	11.1108	10.2287
sp|Q8VBY2|KKCC1_MOUSE	Camkk1	KKCC1_MOUSE Calcium/calmodulin-dependent protein kinase kinase 1	13	2264.65	2432.75	2184.2	2596.41	1867.56	2001.42	2572.86	2372.13	2293.73	11.5062	11.1171	10.7887	11.1082	10.3417	10.7838	11.9925	11.133	11.2289
sp|P42567|EPS15_MOUSE	Eps15	EPS15_MOUSE Epidermal growth factor receptor substrate 15	13	2488.1	2819.98	2377.66	2785.59	2189.25	2204.17	2779.06	2558.34	2496.02	11.4539	11.6759	10.641	10.7979	10.9842	10.7604	11.7366	10.8789	11.0712
sp|Q6P542|ABCF1_MOUSE	Abcf1	ABCF1_MOUSE ATP-binding cassette sub-family F member 1	13	1428.63	1562.16	1675.95	1759.78	1289.01	1392.32	1825.41	1632.4	1783.72	10.4071	10.2352	11.8691	10.7947	10.2342	10.756	12.1993	10.9845	12.5199
sp|Q8R123|FAD1_MOUSE	Flad1	FAD1_MOUSE FAD synthase	13	1442.69	1658.97	1531.74	1791.66	1383.82	1302.2	1445.59	1506.17	1363.19	11.2248	11.6093	11.5861	11.7382	11.7347	10.7444	10.3184	10.8248	10.2194
sp|Q9JHW2|NIT2_MOUSE	Nit2	NIT2_MOUSE Omega-amidase NIT2	13	1778.97	2000.08	1791.01	2147.78	1579.31	1511.44	1593.85	1626.97	1594.13	11.8972	12.0306	11.6445	12.095	11.5115	10.7194	9.77882	10.0507	10.2722
sp|Q9D7N9|APMAP_MOUSE	Apmap	APMAP_MOUSE Adipocyte plasma membrane-associated protein	13	2156.36	2310.69	2109.14	2431.39	2035.92	1891.62	2216.76	2293.09	2093.76	11.5149	11.0979	10.9494	10.9329	11.8492	10.7121	10.8598	11.311	10.7728
sp|Q8BVG4|DPP9_MOUSE	Dpp9	DPP9_MOUSE Dipeptidyl peptidase 9	13	1481.54	1604.21	1470.15	1659.56	1263.59	1264.1	1518.92	1465.76	1350.05	11.8362	11.5271	11.4184	11.1643	11.0025	10.7098	11.1325	10.8169	10.3923
sp|Q61771|KIF3B_MOUSE	Kif3b	KIF3B_MOUSE Kinesin-like protein KIF3B	13	1709.33	1867.95	1768.25	1959.31	1617.54	1569.37	1979.5	1952.7	1804.69	10.9966	10.8084	11.0592	10.6139	11.3416	10.7068	11.6829	11.6041	11.1866
sp|Q8C0D4|RHG12_MOUSE	Arhgap12	RHG12_MOUSE Rho GTPase-activating protein 12	13	2067.66	2296.73	2042.07	2285.17	2036.16	1860.82	2126.72	2293.13	2223.97	11.2083	11.1978	10.7616	10.4308	12.0298	10.6971	10.5763	11.4823	11.6159
sp|P29387|GBB4_MOUSE	Gnb4	GBB4_MOUSE Guanine nucleotide-binding protein subunit beta-4	13	1548.13	1794.4	1574.63	1909.82	1547.3	1379.38	1443	1603.67	1483.02	11.3132	11.7939	11.1867	11.7519	12.3236	10.6896	9.67396	10.8251	10.442
sp|Q8R574|KPRB_MOUSE	Prpsap2	KPRB_MOUSE Phosphoribosyl pyrophosphate synthase-associated protein 2	13	2791.01	2915.35	2488.68	3076.87	2338.51	2311.32	2807.96	2640.11	2590.13	12.1699	11.4335	10.5497	11.2973	11.1135	10.6877	11.2325	10.6338	10.882
sp|Q8VE11|MTMR6_MOUSE	Mtmr6	MTMR6_MOUSE Myotubularin-related protein 6	13	1328.55	1560.98	1389.52	1640.09	1261.21	1225.95	1418.48	1488.19	1409.29	10.9139	11.5335	11.0972	11.3451	11.2922	10.6801	10.6902	11.2928	11.1549
sp|Q9ER00|STX12_MOUSE	Stx12	STX12_MOUSE Syntaxin-12	13	1028.99	1123.11	1087.33	1264.17	920.36	943.008	1208.36	1085.88	1130.32	10.9881	10.7869	11.2881	11.3673	10.7117	10.679	11.8378	10.7112	11.6299
sp|P61358|RL27_MOUSE	Rpl27	RL27_MOUSE 60S ribosomal protein L27	13	2229.52	2217.65	2209.09	2610.27	1851.88	1978.47	2647.44	2474.31	2354.83	11.3349	10.1405	10.9186	11.1746	10.2614	10.6669	12.3479	11.6199	11.5353
sp|Q9DBC7|KAP0_MOUSE	Prkar1a	KAP0_MOUSE cAMP-dependent protein kinase type I-alpha regulatory subunit	13	2282.98	2535.6	2199.99	2757.93	2309.54	2018.08	2210.77	2363.85	2277.19	11.365	11.353	10.6472	11.5609	12.5309	10.6539	10.0965	10.87	10.9227
sp|P51859|HDGF_MOUSE	Hdgf	HDGF_MOUSE Hepatoma-derived growth factor	13	2614.73	2745.12	2589.65	3110.66	2348.82	2323.27	2725.74	3049.05	2747.05	11.2663	10.6384	10.8478	11.2862	11.0304	10.6159	10.7746	12.1356	11.4047
sp|Q641K1|CBPC1_MOUSE	Agtpbp1	CBPC1_MOUSE Cytosolic carboxypeptidase 1	13	1142.39	1285.96	1311.54	1425.96	1090.98	1075.6	1340.32	1321.66	1240.13	10.627	10.7594	11.8611	11.1698	11.0612	10.6108	11.4385	11.3569	11.1154
sp|P49615|CDK5_MOUSE	Cdk5	CDK5_MOUSE Cyclin-dependent kinase 5	13	2464.42	2755.71	2464.38	2816.69	2315.3	2150.13	2543.96	2519.74	2406.46	11.4655	11.5311	11.1463	11.0346	11.7401	10.6082	10.858	10.8287	10.7874
sp|P54285|CACB3_MOUSE	Cacnb3	CACB3_MOUSE Voltage-dependent L-type calcium channel subunit beta-3	13	1046.58	1184.27	1165.58	1295.43	971.753	984.165	1231.5	1250.75	1171.06	10.623	10.8116	11.5018	11.0721	10.7503	10.5936	11.4676	11.727	11.453
sp|Q80WQ2|VAC14_MOUSE	Vac14	VAC14_MOUSE Protein VAC14 homolog	13	2312.23	2708.25	2376.75	2871.25	2182.48	2049.69	2410.2	2381.55	2176.46	11.2589	11.8608	11.2511	11.7727	11.5825	10.5841	10.7666	10.7119	10.2112
sp|P14576|SRP54_MOUSE	Srp54	SRP54_MOUSE Signal recognition particle 54 kDa protein	13	2221.24	2450.41	2213.65	2724.79	2026.34	2019.24	2522.07	2599.35	2384.11	10.978	10.8925	10.6361	11.3397	10.9151	10.5832	11.4353	11.8668	11.3532
sp|Q8C547|HTR5B_MOUSE	Heatr5b	HTR5B_MOUSE HEAT repeat-containing protein 5B	13	1089.4	1265.22	1247.26	1353.07	1072.35	1022.1	1202.3	1284.05	1203.95	10.5962	11.0685	11.7941	11.0821	11.368	10.5428	10.7284	11.5368	11.2832
sp|P99027|RLA2_MOUSE	Rplp2	RLA2_MOUSE 60S acidic ribosomal protein P2	13	2207.2	2191.62	2326.29	2662.29	1936.18	2075.28	3118.88	2722.15	2611.58	10.5684	9.43832	10.8288	10.734	10.1042	10.5377	13.7002	12.0399	12.0485
sp|Q8CGZ0|CHERP_MOUSE	Cherp	CHERP_MOUSE Calcium homeostasis endoplasmic reticulum protein	13	2079.75	2169.74	2231.14	2412.43	1894.66	1931.46	2648.01	2576.31	2409.64	10.6786	10.0201	11.1372	10.4303	10.6029	10.517	12.4734	12.2192	11.9212
sp|P52479-2|UBP10_MOUSE	Usp10	UBP10_MOUSE Isoform 2 of Ubiquitin carboxyl-terminal hydrolase 10	13	1507.77	1633.23	1676.51	1821.96	1370.51	1391.43	1833.42	1801.16	1654.33	10.7316	10.4553	11.6006	10.9196	10.6316	10.5025	11.9716	11.8419	11.3452
sp|P28658|ATX10_MOUSE	Atxn10	ATX10_MOUSE Ataxin-10	13	2072.59	2473.03	2164.08	2654.57	2041.35	1933.15	2312.58	2459.44	2301.65	10.6167	11.3937	10.7769	11.4501	11.3967	10.5012	10.8676	11.6373	11.3599
sp|P47856|GFPT1_MOUSE	Gfpt1	GFPT1_MOUSE Glutamine--fructose-6-phosphate aminotransferase [isomerizing] 1	13	1820.57	2014.52	2001.99	2164.23	1624.11	1619.39	1912.83	2060.59	1911.85	11.1085	11.0556	11.8756	11.1197	10.8007	10.4785	10.7075	11.614	11.2399
sp|Q8JZR0|ACSL5_MOUSE	Acsl5	ACSL5_MOUSE Long-chain-fatty-acid--CoA ligase 5	13	1683.9	1915.21	1789.34	1985.54	1617.22	1493.98	1845.81	1793.19	1685.02	11.1235	11.379	11.4912	11.0444	11.6434	10.4658	11.186	10.9419	10.7249
sp|Q7TNM2|TRI46_MOUSE	Trim46	TRI46_MOUSE Tripartite motif-containing protein 46	13	1850.32	1899.46	1964.69	2133.79	1660.76	1638.61	2198.12	2027.75	1980.48	11.139	10.2847	11.4985	10.8166	10.8967	10.4611	12.1398	11.276	11.4877
sp|P47746|CNR1_MOUSE	Cnr1	CNR1_MOUSE Cannabinoid receptor 1	13	2819.41	3331.86	2810.49	3356.06	2824.69	2498.21	3109.44	2837.54	2856	11.1316	11.8318	10.7877	11.1576	12.1551	10.46	11.2628	10.3487	10.8648
sp|Q8C0E2|VP26B_MOUSE	Vps26b	VP26B_MOUSE Vacuolar protein sorting-associated protein 26B	13	1962.83	2165.41	1829.5	2255.66	2052.79	1661.63	1905.99	1941.19	1796.65	11.6415	11.5512	10.5488	11.2652	13.2696	10.451	10.3707	10.6349	10.2672
sp|Q6P1H6|ANKL2_MOUSE	Ankle2	ANKL2_MOUSE Ankyrin repeat and LEM domain-containing protein 2	13	1954.59	2158.27	2055.83	2324.36	1876.92	1743.53	2160.22	2183.61	2038.95	11.0368	10.9611	11.2855	11.0518	11.5511	10.4404	11.1905	11.3895	11.0932
sp|Q6GQT9|NOMO1_MOUSE	Nomo1	NOMO1_MOUSE Nodal modulator 1	13	2888.52	2988.69	2736.3	3275.79	2577.12	2482.63	3153.29	3169.53	3073.29	11.454	10.6591	10.5485	10.9379	11.1379	10.4398	11.4711	11.6096	11.7421
sp|P62717|RL18A_MOUSE	Rpl18a	RL18A_MOUSE 60S ribosomal protein L18a	13	3262.01	3407.42	3263.9	3843.36	3000.15	2863.69	3676.73	3709.66	3450.4	11.1839	10.5073	10.879	11.0958	11.2108	10.412	11.5646	11.7485	11.3982
sp|Q69ZK9|NLGN2_MOUSE	Nlgn2	NLGN2_MOUSE Neuroligin-2	13	1116.75	1277.87	1111.14	1321.37	1174.32	1004.8	1220.12	1282.26	1170.64	10.9098	11.2282	10.553	10.8699	12.5036	10.4098	10.9352	11.5712	11.0191
sp|P35123|UBP4_MOUSE	Usp4	UBP4_MOUSE Ubiquitin carboxyl-terminal hydrolase 4	13	1726.67	1999.67	1862.21	2098.69	1767.89	1541.5	1637.93	2041.22	1722.42	10.9894	11.4468	11.5223	11.2474	12.2633	10.4042	9.56361	12.0004	10.5625
sp|Q6PGB8|SMCA1_MOUSE	Smarca1	SMCA1_MOUSE Probable global transcription activator SNF2L1	13	1599.5	1822.52	1917.08	1969.75	1448.8	1505.8	1855.11	2085.86	1852.88	10.4196	10.6782	12.1409	10.8048	10.2863	10.4024	11.0865	12.5514	11.6299
sp|Q99KP6|PRP19_MOUSE	Prpf19	PRP19_MOUSE Pre-mRNA-processing factor 19	13	2149.4	2288.48	2063.9	2470.56	1892.72	1816.05	2316.47	2332.74	2083.75	11.574	11.0834	10.8044	11.2021	11.1081	10.3704	11.4434	11.6031	10.8112
sp|Q3UYV9|NCBP1_MOUSE	Ncbp1	NCBP1_MOUSE Nuclear cap-binding protein subunit 1	13	2066.79	2227.71	2230.42	2544.68	2029.01	1876.29	2214.48	2599.33	2255.01	10.7712	10.4421	11.3006	11.1671	11.5249	10.3697	10.5877	12.5132	11.3234
sp|Q8BUH8|SENP7_MOUSE	Senp7	SENP7_MOUSE Sentrin-specific protease 7	13	1311.72	1473.59	1600.64	1718.2	1300.35	1327.24	1637.3	2029.09	1800.26	9.66223	9.76279	11.4624	10.6574	10.4396	10.3678	11.0643	13.8063	12.7771
sp|O08795-2|GLU2B_MOUSE	Prkcsh	GLU2B_MOUSE Isoform 2 of Glucosidase 2 subunit beta	13	1793.99	1952.67	1699.59	1885.22	1613.37	1579.94	2345.92	1852.28	2194.53	11.073	10.8401	10.1985	9.79817	10.8534	10.3415	13.2837	10.5607	13.0511
sp|Q3UHX2|HAP28_MOUSE	Pdap1	HAP28_MOUSE 28 kDa heat- and acid-stable phosphoprotein	13	1817.06	2069.76	2188.84	2262.66	1626.6	1777.24	2785.18	1969.33	2611.63	9.95103	10.1948	11.6536	10.4342	9.70882	10.3216	13.9931	9.96226	13.7807
sp|O55091|IMPCT_MOUSE	Impact	IMPCT_MOUSE Protein IMPACT	13	2244.1	2659.02	2678.11	3234.46	1978.29	2082.65	2679.35	2520.9	2392.54	10.4769	11.1654	12.1553	12.7154	10.0662	10.3111	11.4757	10.8714	10.7625
sp|P62631|EF1A2_MOUSE	Eef1a2	EF1A2_MOUSE Elongation factor 1-alpha 2	13	2258.58	2439.1	2422.54	2732.45	2067.1	1929.53	2369.14	2344.49	2208.45	11.3642	11.0381	11.8501	11.577	11.3358	10.2957	10.9359	10.8966	10.7066
sp|P58389|PTPA_MOUSE	Ppp2r4	PTPA_MOUSE Serine/threonine-protein phosphatase 2A activator	13	2237.47	2540.07	2328.94	2722.01	2116.28	1957.86	2469.55	2495.18	2237.39	11.0836	11.3169	11.2157	11.3541	11.4257	10.285	11.2228	11.4173	10.6789
sp|Q9Z2U1|PSA5_MOUSE	Psma5	PSA5_MOUSE Proteasome subunit alpha type-5	13	1799.19	1909.64	1531.11	2051.97	1477.42	1423.42	1820.06	1721.26	1703.36	12.1948	11.6415	10.089	11.7113	10.9141	10.2313	11.3173	10.7766	11.1241
sp|Q7TPV4|MBB1A_MOUSE	Mybbp1a	MBB1A_MOUSE Myb-binding protein 1A	13	1472.8	1590.77	1766.43	1730.97	1386.33	1406.49	2007.52	2030.99	1856.89	10.0961	9.80792	11.772	9.99165	10.3577	10.2246	12.6249	12.8605	12.2647
sp|Q6NZN0|RBM26_MOUSE	Rbm26	RBM26_MOUSE RNA-binding protein 26	13	1743.95	1831.77	1959	2165.58	1665.59	1628.64	2304.07	2300.08	2101.54	10.3038	9.73413	11.2524	10.774	10.7256	10.2045	12.4888	12.553	11.9637
tr|E9Q174|E9Q174_MOUSE	Myo6	E9Q174_MOUSE Unconventional myosin-VI	13	1341.64	1784.08	1579.45	1679.84	1279.25	1272.59	1758.89	1543.18	1614.52	10.1372	12.1243	11.602	10.6878	10.5348	10.197	12.1922	10.7706	11.754
sp|Q7TPV2|DZIP3_MOUSE	Dzip3	DZIP3_MOUSE E3 ubiquitin-protein ligase DZIP3	13	1042.43	1172.12	1155.68	1285.92	992.386	918.523	1128.31	1228.57	1077.09	10.8967	11.02	11.7445	11.3189	11.3062	10.1822	10.8203	11.8629	10.8483
sp|Q8R4I7|NETO1_MOUSE	Neto1	NETO1_MOUSE Neuropilin and tolloid-like protein 1	13	1169.06	1326.84	1337.73	1579.56	1196.35	1075.6	1449.34	1392.69	1228.54	10.4033	10.6197	11.5731	11.8361	11.6032	10.1505	11.8322	11.448	10.5338
sp|Q6DFW4|NOP58_MOUSE	Nop58	NOP58_MOUSE Nucleolar protein 58	13	1177.85	1375.35	1329.81	1570.26	1149.66	1089.68	1414.86	1570.63	1475.98	10.1456	10.6552	11.1359	11.3893	10.793	9.95375	11.1805	12.4969	12.2498
sp|Q9Z351|KCNQ2_MOUSE	Kcnq2	KCNQ2_MOUSE Potassium voltage-gated channel subfamily KQT member 2	13	1593.8	1663.44	1652.46	1837.04	1481.9	1298.87	1835.94	1742.34	1527.87	11.3829	10.6853	11.4735	11.0478	11.5352	9.8375	12.0292	11.4946	10.514
sp|Q91WM1|STRBP_MOUSE	Strbp	STRBP_MOUSE Spermatid perinuclear RNA-binding protein	13	1366.29	1449.96	1522.16	1632.1	1258.67	1196.78	1753.77	1754.97	1591.28	10.5678	10.0869	11.4459	10.6299	10.6106	9.81652	12.4445	12.5387	11.8591
sp|O70305|ATX2_MOUSE	Atxn2	ATX2_MOUSE Ataxin-2	13	1642.59	1690.42	1803.78	1944.73	1459.56	1357.82	2085.84	1897.36	1779.88	10.9755	10.159	11.7172	10.9419	10.6293	9.62137	12.7861	11.7108	11.459
sp|P43274|H14_MOUSE	Hist1h1e	H14_MOUSE Histone H1.4	13	1991.79	2589.07	2488.05	2941.46	2031.04	2026.44	4720.98	4057.95	3387.39	7.99208	9.34375	9.70559	9.93845	8.88222	8.62284	17.3784	15.0406	13.0961
sp|P54775|PRS6B_MOUSE	Psmc4	PRS6B_MOUSE 26S protease regulatory subunit 6B	12	2487.34	2027.76	2326.92	2063.84	2462.65	2501.88	2108.51	2776.85	1972.08	12.407	9.0972	11.2839	8.66853	13.3881	13.2342	9.64866	12.7945	9.47799
sp|Q8C052|MAP1S_MOUSE	Map1s	MAP1S_MOUSE Microtubule-associated protein 1S	12	1314.8	1537.8	1427.04	1683.66	1258.14	1542.51	1508.06	1556.08	1476.46	10.3093	10.845	10.8781	11.1164	10.7519	12.8262	10.848	11.2705	11.1546
sp|P42125|ECI1_MOUSE	Eci1	ECI1_MOUSE Enoyl-CoA delta isomerase 1, mitochondrial	12	2618.62	2870.89	2558.42	3125.24	2437.18	2789.2	2750.32	2765.34	2709.37	11.0856	10.9311	10.5294	11.1406	11.245	12.5218	10.6815	10.8137	11.0514
sp|Q5DTX6|JCAD_MOUSE	Jcad	JCAD_MOUSE Junctional protein associated with coronary artery disease	12	1159.65	1302.32	1206.1	1289.46	1039.85	1246.49	1342.54	1279.65	1175.12	10.9499	11.0602	11.0717	10.2526	10.7014	12.4817	11.6298	11.1614	10.6913
sp|Q6NS60|FBX41_MOUSE	Fbxo41	FBX41_MOUSE F-box only protein 41	12	1160.79	1403.19	1355.33	1570.04	1107.21	1341	1271.2	1395.72	1341.37	10.1474	11.0326	11.5184	11.5572	10.5492	12.4317	10.1948	11.2704	11.2983
sp|Q91WK2|EIF3H_MOUSE	Eif3h	EIF3H_MOUSE Eukaryotic translation initiation factor 3 subunit H	12	1755.96	1829.13	1660.78	2036.58	1537.65	1834.81	2029.98	1864.96	1891.02	11.1424	10.4392	10.2452	10.8819	10.6343	12.3468	11.8172	10.9313	11.5617
sp|Q3UTH8|ARHG9_MOUSE	Arhgef9	ARHG9_MOUSE Rho guanine nucleotide exchange factor 9	12	1393.02	1518	1350.27	1662.02	1206.28	1385.3	1445.86	1436.32	1364.94	11.397	11.1703	10.7399	11.4501	10.7564	12.0192	10.8523	10.8549	10.7599
sp|Q99NB1|ACS2L_MOUSE	Acss1	ACS2L_MOUSE Acetyl-coenzyme A synthetase 2-like, mitochondrial	12	1374.4	1498.33	1362.92	1584.38	1240.86	1365.38	1430.76	1381.34	1337.45	11.3975	11.1755	10.9879	11.0636	11.2152	12.0075	10.8849	10.5813	10.6865
sp|Q99LY9|NDUS5_MOUSE	Ndufs5	NDUS5_MOUSE NADH dehydrogenase [ubiquinone] iron-sulfur protein 5	12	1470.13	1717.92	1520.07	1858.99	1384.36	1533.7	1561.18	1605.39	1551.61	10.8067	11.358	10.863	11.5068	11.0911	11.9558	10.5282	10.9008	10.9896
sp|Q8VEH5|EPMIP_MOUSE	Epm2aip1	EPMIP_MOUSE EPM2A-interacting protein 1	12	1240.98	1350.8	1340.3	1540.79	1079.17	1286.2	1384.84	1377.74	1318.48	10.8762	10.6479	11.4199	11.3709	10.3084	11.9543	11.1346	11.1538	11.1339
sp|P62702|RS4X_MOUSE	Rps4x	RS4X_MOUSE 40S ribosomal protein S4, X isoform	12	1932.04	2087.47	2432.04	2715.22	1778.04	2145.1	2346.93	2243.11	2221.43	10.1481	9.86163	12.4189	12.0091	10.1788	11.9486	11.3091	10.8833	11.2425
sp|Q8BIW1|PRUNE_MOUSE	Prune	PRUNE_MOUSE Protein prune homolog	12	1183.45	1317.15	1184.7	1501.63	1050.07	1168.57	1149.5	1145.02	1143.55	11.399	11.4107	11.0935	12.1792	11.0235	11.9363	10.1575	10.1875	10.6128
sp|O88998|NOE1_MOUSE	Olfm1	NOE1_MOUSE Noelin	12	1504.67	1663.29	1506.16	1680.19	1320.53	1498.76	1671.85	1541.51	1533.83	11.2761	11.211	10.9732	10.6026	10.7858	11.911	11.4941	10.671	11.0753
sp|P63094|GNAS2_MOUSE	Gnas	GNAS2_MOUSE Guanine nucleotide-binding protein G(s) subunit alpha isoforms short	12	1709.11	1845.91	1756.39	2145.64	1474.21	1684.63	1739.61	1665.57	1668.6	11.3796	11.0542	11.3691	12.0297	10.698	11.8949	10.626	10.2438	10.7046
sp|P61089|UBE2N_MOUSE	Ube2n	UBE2N_MOUSE Ubiquitin-conjugating enzyme E2 N	12	2083.26	2207.63	1783.37	2256.82	1683.49	1915.51	2048.65	1989.44	1893.77	12.175	11.6041	10.1324	11.1061	10.7232	11.8716	10.9838	10.7398	10.6639
sp|Q9QYF9|NDRG3_MOUSE	Ndrg3	NDRG3_MOUSE Protein NDRG3	12	1686.4	2061.05	1701.99	2127.26	1596.25	1746.64	1777.53	1768.75	1836.79	10.8017	11.8735	10.5982	11.4733	11.1434	11.8641	10.445	10.465	11.3358
sp|Q91V09|WDR13_MOUSE	Wdr13	WDR13_MOUSE WD repeat-containing protein 13	12	1418.5	1619.62	1497.9	1774.22	1414.42	1491.99	1541.05	1622.33	1530.64	10.6363	10.9229	10.9192	11.2023	11.5592	11.8639	10.6008	11.2368	11.0585
sp|Q6P1F6|2ABA_MOUSE	Ppp2r2a	2ABA_MOUSE Serine/threonine-protein phosphatase 2A 55 kDa regulatory subunit B alpha isoform	12	1332.44	1517.94	1376.83	1665.75	1251	1352.31	1400.41	1414.4	1328.74	11.0047	11.2757	11.0549	11.5845	11.2609	11.8442	10.6107	10.7905	10.5738
[truncated: 6,124 more rows]
