# Supplementary material for: Forniceal deep brain stimulation induces gene expression and splicing changes that promote neurogenesis and plasticity
Source: eLife. 2018 Mar 23;7:e34031. doi: 10.7554/eLife.34031 (PMC5906096; doi:10.7554/eLife.34031)
Supplement: Figure 4—source data 1. [file elife-34031-fig4-data1.xlsx]

## Sheet: mCG
CHR	start	end	strand	P value	Q value	% Diff
chr1	3536359	3536359	-	1.35379e-07	4.32644e-05	-52.5
chr1	4013887	4013887	+	1.23363e-08	8.50754e-06	-55.5191
chr1	4259363	4259363	-	3.94134e-06	0.000415055	57.9365
chr1	4275975	4275975	+	7.94115e-06	0.000661367	-55.5556
chr1	4427032	4427032	-	2.84754e-07	7.17808e-05	64
chr1	4544889	4544889	-	4.28068e-05	0.00200355	-52.1635
chr1	4802776	4802776	+	3.93231e-06	0.000414547	61.4833
chr1	4947228	4947228	+	1.84359e-06	0.000250058	-58.5004
chr1	5443088	5443088	+	5.22731e-07	0.000107693	-57.5758
chr1	5694955	5694955	+	1.85354e-06	0.00025099	51.2821
chr1	5701199	5701199	-	1.51717e-06	0.000219392	-58.3333
chr1	6373740	6373740	-	1.19085e-08	8.29438e-06	-50.6239
chr1	7155103	7155103	+	7.12233e-08	2.79107e-05	-57.0393
chr1	7362267	7362267	-	6.69841e-13	7.12224e-09	82.1429
chr1	8625865	8625865	-	3.19399e-08	1.62316e-05	-56.1026
chr1	9548419	9548419	+	8.41453e-10	1.31902e-06	50.2866
chr1	9561662	9561662	+	6.82411e-07	0.000128315	-60.8597
chr1	9639457	9639457	+	5.7858e-06	0.000536976	50.9158
chr1	9664795	9664795	-	2.3696e-05	0.00135983	50.4873
chr1	9768669	9768669	-	1.84406e-09	2.27555e-06	72.4265
chr1	9837452	9837452	+	1.27015e-06	0.000194582	53.8462
chr1	10018757	10018757	-	2.23482e-11	9.93693e-08	-61.1111
chr1	10744178	10744178	-	3.08204e-07	7.55905e-05	-52.8431
chr1	10994859	10994859	-	6.90847e-08	2.73333e-05	-72
chr1	11328950	11328950	+	3.50316e-13	4.30112e-09	-57.5758
chr1	11493048	11493048	+	2.05695e-09	2.45382e-06	-68.9964
chr1	11565821	11565821	-	1.62813e-09	2.08342e-06	61.6487
chr1	11571083	11571083	+	2.43039e-06	0.000300975	51.094
chr1	11571118	11571118	+	8.72422e-06	0.000703942	60.6494
chr1	11652026	11652026	-	1.85354e-06	0.00025099	51.2821
chr1	11755406	11755406	+	0.000111768	0.00375251	-52.1429
chr1	11774499	11774499	+	6.18286e-07	0.000120305	60.4247
chr1	12193188	12193188	+	9.69817e-07	0.000162793	-56.746
chr1	12324099	12324099	+	1.08557e-07	3.7415e-05	57.0513
chr1	12811483	12811483	+	1.07776e-05	0.000809176	-56.2378
chr1	12865201	12865201	-	1.32448e-07	4.26692e-05	-65.7576
chr1	12871891	12871891	+	2.36773e-07	6.32902e-05	62.1429
chr1	12877619	12877619	+	2.97757e-07	7.39314e-05	-58.0808
chr1	12978962	12978962	-	1.17401e-06	0.000184708	53.092
chr1	13095552	13095552	+	6.32609e-08	2.57129e-05	-57.6923
chr1	13420588	13420588	-	7.22417e-05	0.00282391	51.0698
chr1	13427742	13427742	-	0.000124075	0.00401401	-56.6667
chr1	13771306	13771306	+	1.06904e-07	3.70454e-05	-56.192
chr1	14022641	14022641	-	6.94972e-06	0.000606522	55
chr1	14041982	14041982	+	1.90718e-05	0.001179	53.5714
chr1	14126973	14126973	-	7.87895e-06	0.00065778	57.5758
chr1	14147860	14147860	-	2.47309e-10	5.48611e-07	-64.3057
chr1	14166240	14166240	+	3.00819e-09	3.20239e-06	-69.3684
chr1	14167324	14167324	-	3.44158e-09	3.50721e-06	-54.827
chr1	14292497	14292497	-	1.86173e-09	2.28917e-06	-54.3771
chr1	14333555	14333555	+	6.80547e-07	0.000128094	56.4655
chr1	14491154	14491154	+	1.57021e-08	1.00261e-05	-68.3598
chr1	14651857	14651857	-	2.81598e-05	0.0015207	-51.1396
chr1	14764695	14764695	+	9.08761e-05	0.00327682	-50.3704
chr1	15359273	15359273	-	1.12548e-11	6.01981e-08	70.9677
chr1	15509943	15509943	-	7.96243e-07	0.000142486	-60
chr1	15705277	15705277	-	1.46024e-07	4.56036e-05	52.7778
chr1	15842175	15842175	-	7.67557e-06	0.000646761	52.7778
chr1	15882393	15882393	-	6.49985e-08	2.62039e-05	54.6087
chr1	15913753	15913753	+	1.2549e-06	0.000193215	-52.7864
chr1	16101288	16101288	+	7.83547e-06	0.000655182	57.9125
chr1	16148939	16148939	-	1.43714e-06	0.000211385	59.6429
chr1	16155368	16155368	+	3.42393e-05	0.0017304	-61.4815
chr1	16208568	16208568	+	3.01733e-07	7.45738e-05	-56.25
chr1	16214388	16214388	-	4.20598e-09	4.03982e-06	51.5625
chr1	16230664	16230664	-	4.69267e-06	0.000466379	-52
chr1	16485993	16485993	-	4.90441e-05	0.00219124	-52.1839
chr1	16821915	16821915	-	3.75797e-06	0.000402251	57.3099
chr1	17066258	17066258	-	1.25055e-08	8.58926e-06	-58.6957
chr1	18002593	18002593	+	8.80962e-07	0.000152645	-54.0179
chr1	18046702	18046702	+	1.00986e-08	7.4163e-06	-63.9032
chr1	18569426	18569426	+	1.21638e-09	1.70633e-06	-67.5
chr1	18977393	18977393	-	6.2913e-09	5.32167e-06	-57.622
chr1	19009666	19009666	-	2.73742e-09	3.00498e-06	51.4825
chr1	19023949	19023949	-	4.33931e-06	0.000443135	54.6105
chr1	19119089	19119089	-	4.67694e-09	4.35257e-06	60.1744
chr1	19119139	19119139	-	5.99818e-07	0.000118174	64.4444
chr1	19214788	19214788	+	1.2223e-06	0.000189955	57.1429
chr1	19576649	19576649	-	4.72777e-05	0.00213683	-60
chr1	19768391	19768391	+	1.17179e-07	3.94148e-05	62.5
chr1	19826877	19826877	-	3.97931e-05	0.00190905	-52.1538
chr1	19868763	19868763	-	5.65673e-05	0.00240449	50.6629
chr1	19868785	19868785	-	6.53759e-06	0.00058286	53.4091
chr1	19888133	19888133	-	2.32999e-05	0.00134438	-54.2857
chr1	19982869	19982869	+	2.08033e-09	2.47233e-06	-72.5926
chr1	20726622	20726622	+	2.04823e-06	0.000268556	51.4286
chr1	20845844	20845844	+	7.74269e-06	0.000650672	-53.9589
chr1	20875144	20875144	-	5.2988e-05	0.00230626	-55.7721
chr1	20905702	20905702	-	2.49615e-05	0.00140553	-51.168
chr1	20950613	20950613	-	1.50831e-06	0.000218596	-51.8519
chr1	20958769	20958769	-	1.69992e-05	0.00109362	53.8721
chr1	21033227	21033227	-	2.35744e-10	5.27572e-07	70.6836
chr1	21053067	21053067	-	5.00797e-07	0.000104513	-51.8145
chr1	21074471	21074471	+	7.61664e-06	0.000643311	56
chr1	21089961	21089961	-	4.94976e-07	0.000103696	59.5533
chr1	21165226	21165226	-	2.46557e-06	0.000303879	-54.386
chr1	21167311	21167311	-	3.0578e-10	6.3914e-07	-73.9049
chr1	21412330	21412330	+	2.42484e-06	0.000300551	-55.8081
chr1	21460890	21460890	+	2.36274e-06	0.000295716	61.0577
chr1	21461116	21461116	-	5.85284e-10	1.01513e-06	55.3872
chr1	21601202	21601202	-	7.84741e-05	0.00298051	52.1991
chr1	21628876	21628876	+	4.02376e-07	9.05448e-05	53.5714
chr1	21733203	21733203	+	8.4397e-08	3.14736e-05	-53.5714
chr1	21875606	21875606	+	4.38964e-07	9.58577e-05	59.1941
chr1	21936630	21936630	-	1.15486e-07	3.90327e-05	54.9153
chr1	22387211	22387211	+	2.91202e-08	1.52547e-05	-55.3922
chr1	22512753	22512753	-	7.29853e-07	0.000134358	54.8951
chr1	22598920	22598920	+	1.28872e-05	0.000911216	-50.2778
chr1	22607668	22607668	-	4.51379e-05	0.00207516	-50.6977
chr1	22687810	22687810	-	1.26487e-06	0.000194213	70.979
chr1	23112295	23112295	+	1.03579e-07	3.62452e-05	60.3774
chr1	23201191	23201191	+	1.93362e-07	5.52563e-05	58.3333
chr1	23239657	23239657	+	2.41789e-11	1.06116e-07	-60.3856
chr1	23445718	23445718	+	6.31513e-09	5.33322e-06	-50.5198
chr1	23462589	23462589	+	2.92351e-08	1.52859e-05	55.8824
chr1	23468066	23468066	-	1.41196e-06	0.000208894	61.75
chr1	23513701	23513701	-	6.59627e-07	0.0001254	59.9542
chr1	23605070	23605070	-	9.70359e-07	0.000162817	62.0301
chr1	23663233	23663233	-	1.15935e-05	0.000848646	50.323
chr1	23705356	23705356	-	9.30736e-05	0.00332937	51.2987
chr1	23705410	23705410	-	3.8405e-14	7.3824e-10	90.5462
chr1	23741276	23741276	+	1.13992e-05	0.000839116	55.2381
chr1	23767303	23767303	-	0.000442187	0.00914522	50.6494
chr1	23822796	23822796	+	6.02716e-11	2.03461e-07	-57.5077
chr1	23832835	23832835	+	2.77825e-08	1.47647e-05	-52.4167
chr1	23969282	23969282	+	4.70149e-07	0.000100362	53.5924
chr1	24172493	24172493	+	0.000296838	0.00706775	50.2525
chr1	24290380	24290380	+	3.05062e-09	3.23038e-06	54.6957
chr1	24328354	24328354	+	0.000276421	0.00675182	-51.6667
chr1	24587735	24587735	+	0.000163721	0.0048122	-52.8846
chr1	24735085	24735085	-	1.02045e-06	0.00016839	-67.5953
chr1	24796692	24796692	-	4.03205e-10	7.79485e-07	62.1569
chr1	24943026	24943026	+	5.04206e-06	0.000489436	-58.3744
chr1	25080433	25080433	-	2.48018e-06	0.000305026	-55.7692
chr1	25171980	25171980	+	9.32369e-07	0.000158514	-57.7403
chr1	25606837	25606837	-	1.6151e-07	4.88798e-05	63.6917
chr1	26182177	26182177	-	2.66794e-08	1.43529e-05	62.5387
chr1	26726147	26726147	-	5.78745e-09	5.04577e-06	59.201
chr1	26843979	26843979	-	1.42554e-05	0.000974789	54.7619
chr1	27010065	27010065	-	2.5279e-05	0.00141725	-52.1576
chr1	27435862	27435862	-	3.61916e-06	0.000392321	53.3333
chr1	29035019	29035019	+	1.77414e-05	0.00112504	-56.3492
chr1	29251979	29251979	-	4.93047e-08	2.16431e-05	60.4549
chr1	29571373	29571373	-	4.15575e-07	9.24516e-05	-57.1429
chr1	30572819	30572819	-	1.08329e-06	0.00017509	-61.0961
chr1	30770627	30770627	-	6.61525e-06	0.000587085	50.1224
chr1	30798924	30798924	-	2.96883e-05	0.00157596	-57.5448
chr1	30828784	30828784	-	2.65616e-07	6.82842e-05	-65.5797
chr1	30840004	30840004	+	2.34181e-05	0.00134893	50.1158
chr1	30945194	30945194	-	7.56782e-06	0.00064049	58.6207
chr1	31101493	31101493	-	0.000164176	0.00482205	-54.697
chr1	31509079	31509079	-	9.17308e-06	0.000727485	-57.0652
chr1	31580713	31580713	-	7.99841e-06	0.000664765	-57.7381
chr1	31641300	31641300	-	2.14748e-07	5.92261e-05	-59.9327
chr1	33104989	33104989	-	5.32016e-07	0.000108901	-53.3333
chr1	33453079	33453079	-	2.61405e-05	0.00144842	-51.0965
chr1	33531362	33531362	-	2.13435e-06	0.000276024	-50.5051
chr1	33719521	33719521	-	2.32192e-05	0.00134118	-50.4505
chr1	33751610	33751610	+	8.49244e-06	0.000691566	-50.6667
chr1	33859497	33859497	+	2.40858e-08	1.33693e-05	-61.2544
chr1	33909354	33909354	+	4.81669e-05	0.00216499	-51.2639
chr1	33918684	33918684	-	1.81758e-07	5.29195e-05	-52.5
chr1	33964128	33964128	+	1.35202e-08	9.04114e-06	-54.1751
chr1	34120661	34120661	-	4.91315e-07	0.000103161	-53.5951
chr1	34128985	34128985	-	1.28609e-06	0.000196117	-54.2949
chr1	34144895	34144895	-	1.29741e-05	0.000915421	-54.0741
chr1	34158343	34158343	-	2.32569e-09	2.6702e-06	67.8571
chr1	34225526	34225526	+	1.87476e-05	0.00116594	-53.1034
chr1	34240289	34240289	-	3.51612e-06	0.000384857	-64.4615
chr1	34250372	34250372	+	1.09652e-06	0.000176652	-51.3514
chr1	34257908	34257908	-	8.1062e-10	1.28866e-06	-52.1137
chr1	34264644	34264644	+	5.38301e-08	2.29944e-05	-52.8428
chr1	34460349	34460349	+	3.21474e-11	1.28999e-07	-58.9744
chr1	34475436	34475436	-	6.77374e-09	5.60588e-06	-57.3684
chr1	34484680	34484680	+	4.42398e-10	8.32758e-07	-54.7811
chr1	34525877	34525877	+	2.88355e-07	7.23987e-05	59.648
chr1	34580785	34580785	-	9.4018e-06	0.000739208	54.9107
chr1	34584448	34584448	-	3.71756e-05	0.00182446	-51.0256
chr1	34683960	34683960	+	3.81938e-06	0.000406743	-51.0684
chr1	34775740	34775740	+	1.25632e-05	0.000896419	-53.2245
chr1	34794030	34794030	+	0.000101182	0.00351388	50.8621
chr1	34805959	34805959	+	2.93317e-06	0.000341419	-53.1525
chr1	34806468	34806468	-	3.55106e-09	3.5877e-06	51.2195
chr1	34807913	34807913	-	3.74368e-05	0.00183322	56.2169
chr1	34894849	34894849	+	6.78745e-06	0.000597047	52.0408
chr1	34930328	34930328	-	9.40183e-07	0.000159485	-51.9355
chr1	34991288	34991288	-	0.00013729	0.00428774	53.3846
chr1	35059520	35059520	-	7.41145e-06	0.00063109	53.3835
chr1	35179468	35179468	+	4.92302e-07	0.000103342	56.1404
chr1	35384657	35384657	+	2.46865e-06	0.000304105	-60.4286
chr1	35385736	35385736	-	1.58421e-07	4.81954e-05	52.5358
chr1	35775468	35775468	-	2.30169e-08	1.29797e-05	62.5
chr1	35802680	35802680	-	6.76081e-07	0.000127581	-64.6552
chr1	35802699	35802699	-	2.04501e-05	0.00123461	-51.601
chr1	35830368	35830368	+	1.59249e-06	0.000227085	55.8511
chr1	35885258	35885258	-	1.69503e-09	2.13746e-06	-54.7348
chr1	36030661	36030661	-	5.24277e-09	4.70412e-06	-63.6364
chr1	36030677	36030677	-	8.55291e-09	6.63661e-06	-63.6364
chr1	36052200	36052200	-	4.08359e-06	0.000425355	-51.5152
chr1	36159748	36159748	-	6.71241e-08	2.6812e-05	51.7241
chr1	36162962	36162962	+	8.29855e-07	0.000146483	64
chr1	36275952	36275952	-	3.28183e-07	7.88391e-05	69.7143
chr1	36323262	36323262	+	3.72948e-06	0.000400356	51.9608
chr1	36344812	36344812	-	1.38414e-07	4.38889e-05	-54.697
chr1	36407850	36407850	+	0.00051657	0.0100988	-51.1667
chr1	36432821	36432821	+	9.30736e-05	0.00332937	51.6129
chr1	36477390	36477390	+	1.85942e-06	0.000251562	56.0741
chr1	36497151	36497151	+	1.66139e-09	2.11003e-06	-61.6299
chr1	36516155	36516155	+	2.09124e-06	0.000272304	-58.3333
chr1	36531520	36531520	+	2.40192e-09	2.72715e-06	75
chr1	36531572	36531572	+	4.74197e-05	0.0021411	51.5873
chr1	36532294	36532294	+	2.5966e-05	0.00144244	-51.5233
chr1	36532309	36532309	+	1.23218e-07	4.07482e-05	-64.4265
chr1	36546015	36546015	+	1.40897e-06	0.00020867	-53.9785
chr1	36697262	36697262	+	3.45179e-06	0.000379998	-52.7709
chr1	36781318	36781318	+	3.08576e-06	0.000352476	-52.7244
chr1	36859135	36859135	-	1.16607e-06	0.000183938	-50.2385
chr1	37065807	37065807	-	1.0891e-08	7.77644e-06	53.4722
chr1	37110772	37110772	-	8.25788e-09	6.46351e-06	-65.7895
chr1	37115941	37115941	+	3.31629e-08	1.66152e-05	63.6243
chr1	37142923	37142923	-	9.33109e-05	0.00333563	-58.3333
chr1	37186938	37186938	-	5.25398e-06	0.000502625	-53.7267
chr1	37237658	37237658	+	4.2854e-07	9.44983e-05	-56.1464
chr1	37248329	37248329	-	3.74003e-07	8.6214e-05	-51.7241
chr1	37250460	37250460	+	2.49885e-06	0.000306358	53.8539
chr1	37342768	37342768	+	9.03279e-07	0.000155072	-55.5556
chr1	37349929	37349929	-	2.67266e-06	0.000320954	51.9549
chr1	37358663	37358663	+	3.35295e-08	1.67493e-05	-60.6061
chr1	37358749	37358749	+	9.55446e-05	0.00338415	-50.2155
chr1	37473565	37473565	+	4.92281e-07	0.000103342	54.5455
chr1	37559336	37559336	+	3.17884e-06	0.00035959	58.5417
chr1	37583587	37583587	-	1.06159e-05	0.000801747	59.2593
chr1	37674692	37674692	-	3.415e-05	0.00172742	51.3889
chr1	37687512	37687512	-	1.17658e-10	3.25534e-07	55.1724
chr1	37687535	37687535	-	8.51575e-12	4.90653e-08	75
chr1	37687545	37687545	-	6.27734e-09	5.31702e-06	65.625
chr1	37694148	37694148	+	2.09621e-10	4.87448e-07	-56.25
chr1	37701697	37701697	-	2.5634e-06	0.000311901	56.9458
chr1	37701709	37701709	-	5.24529e-05	0.00229167	53.0962
chr1	37715302	37715302	-	5.40869e-08	2.30661e-05	-69.3603
chr1	37727365	37727365	-	1.39388e-07	4.41488e-05	50.7961
chr1	37818183	37818183	-	1.9639e-06	0.000261028	-59.375
chr1	37905480	37905480	+	2.93809e-07	7.3202e-05	-55.7838
chr1	37986173	37986173	-	0.000106029	0.00362312	-50.3226
chr1	37987274	37987274	+	3.28788e-06	0.000367972	-51.8615
chr1	38063872	38063872	+	2.58764e-05	0.00143867	54.1667
chr1	38242772	38242772	+	1.02311e-05	0.000782062	54.4723
chr1	38260120	38260120	-	4.21707e-06	0.000434565	59.2857
chr1	38293951	38293951	+	1.91531e-12	1.58986e-08	-70.3704
chr1	38416557	38416557	-	5.72913e-05	0.0024255	-54.2857
chr1	38436627	38436627	+	2.03521e-10	4.76803e-07	77.8226
chr1	38446684	38446684	-	7.44647e-12	4.43559e-08	-61.0421
chr1	38451008	38451008	+	6.04324e-07	0.000118685	-58.3333
chr1	38451017	38451017	+	1.28486e-06	0.000196041	-52
chr1	38456892	38456892	+	8.39786e-07	0.000147696	62.2619
chr1	38533720	38533720	-	1.08038e-05	0.000810357	-53.3333
chr1	38549117	38549117	-	9.22027e-10	1.41222e-06	62.0674
chr1	38574735	38574735	+	1.92006e-08	1.1537e-05	-58.8266
chr1	38607072	38607072	+	1.56634e-05	0.00103708	-56.0386
chr1	38636363	38636363	+	1.99103e-11	9.09171e-08	63.7538
chr1	38668481	38668481	-	4.80142e-06	0.000473787	54.0541
chr1	38787253	38787253	+	6.55164e-06	0.000583511	59.0278
chr1	38817945	38817945	+	1.60395e-09	2.06547e-06	60.8696
chr1	38885446	38885446	-	1.21121e-10	3.31889e-07	-63.2143
chr1	38963679	38963679	+	0.000181	0.00513981	-50.5882
chr1	38963695	38963695	+	0.000137981	0.0043007	-50.0513
chr1	39029871	39029871	-	9.14859e-06	0.000726257	50.8097
chr1	39064249	39064249	-	0.000579908	0.0108789	-51.1364
chr1	39068192	39068192	+	1.71277e-08	1.06415e-05	54.2151
chr1	39090088	39090088	+	7.27308e-06	0.000624093	52.6786
chr1	39145006	39145006	+	3.89044e-07	8.85361e-05	-52.8533
chr1	39245895	39245895	+	3.42096e-07	8.11547e-05	50.1961
chr1	39391068	39391068	+	2.86624e-08	1.50831e-05	-51.3333
chr1	39502923	39502923	-	3.98583e-09	3.88088e-06	-65
chr1	39512077	39512077	+	5.90933e-05	0.00247517	52.3504
chr1	39556521	39556521	-	5.71198e-16	1.99554e-11	-57.8809
chr1	39565543	39565543	-	1.39362e-05	0.000959657	-54.5455
chr1	39570334	39570334	+	6.64175e-08	2.66175e-05	-54.9803
chr1	39592288	39592288	+	3.93188e-07	8.91749e-05	-53.6232
chr1	39672315	39672315	+	5.10491e-07	0.000105948	-50.0836
chr1	39711993	39711993	-	3.2091e-09	3.34588e-06	54.3478
chr1	39734553	39734553	-	0.000204443	0.00556143	50.9158
chr1	39770906	39770906	+	0.000432977	0.00901949	55.7143
chr1	39796483	39796483	+	1.53286e-07	4.71584e-05	-56
chr1	39869712	39869712	+	1.31377e-05	0.000922486	-59.0793
chr1	39982878	39982878	-	1.33148e-11	6.79945e-08	-68.1406
chr1	39997036	39997036	+	8.06867e-07	0.000143669	55.8689
chr1	40243648	40243648	-	1.34697e-05	0.000938269	58.2844
chr1	40313295	40313295	+	4.35669e-13	5.09581e-09	84.6154
chr1	40404673	40404673	+	6.30774e-06	0.000569436	-52.2903
chr1	40441862	40441862	+	4.32284e-06	0.000441937	-57.5188
chr1	40458449	40458449	+	3.70178e-06	0.000398227	52.5448
chr1	40468200	40468200	+	1.74822e-07	5.14893e-05	51.7241
chr1	40470030	40470030	+	1.01905e-08	7.45254e-06	-68.1894
chr1	40470050	40470050	+	5.48557e-14	9.58223e-10	-82.1429
chr1	40470250	40470250	+	5.17883e-06	0.000498174	-62.1578
chr1	40599668	40599668	+	2.93162e-05	0.00156368	54.1667
chr1	40659595	40659595	-	1.78053e-08	1.09268e-05	66.1905
chr1	40826217	40826217	-	3.6365e-08	1.76646e-05	62.8374
chr1	40870867	40870867	-	1.96401e-09	2.38101e-06	-61.3636
chr1	40874818	40874818	-	4.68094e-09	4.35445e-06	51.2195
chr1	40965308	40965308	+	9.29059e-07	0.000158104	-69.2308
chr1	41002361	41002361	+	2.93063e-06	0.000341247	50.028
chr1	41131198	41131198	+	1.16838e-07	3.93357e-05	67.7419
chr1	41158348	41158348	-	5.4009e-08	2.30552e-05	54.0541
chr1	41267514	41267514	+	1.7481e-05	0.00111427	-59.4545
chr1	41426671	41426671	+	2.93162e-05	0.00156368	54.1667
chr1	41426676	41426676	+	3.06397e-05	0.00160883	51.2315
chr1	41634688	41634688	+	6.87019e-08	2.72404e-05	59.0326
chr1	42117245	42117245	-	2.01943e-07	5.67652e-05	55.2439
chr1	42233534	42233534	+	1.06645e-05	0.000803638	50.2703
chr1	42326009	42326009	+	4.84247e-07	0.000102289	-55.8333
chr1	42533009	42533009	-	2.76368e-08	1.47212e-05	50.3723
chr1	42726030	42726030	+	3.92418e-10	7.64338e-07	-70.4875
chr1	42741774	42741774	-	5.57516e-08	2.35423e-05	51.2012
chr1	42791796	42791796	-	3.415e-05	0.00172742	-51.3889
chr1	42842212	42842212	-	4.75841e-05	0.00214558	-54.6703
chr1	42869273	42869273	+	3.15869e-05	0.00164068	53.8095
chr1	42888684	42888684	+	2.9877e-06	0.000345479	54.2398
chr1	42888784	42888784	-	8.05204e-06	0.000667898	51.0832
chr1	42889763	42889763	-	2.26529e-06	0.000287643	-52.2449
chr1	43042240	43042240	-	5.53046e-08	2.34102e-05	-55.6836
chr1	43045003	43045003	-	2.67934e-06	0.000321468	-56.015
chr1	43137426	43137426	-	5.96758e-10	1.02975e-06	55
chr1	43164280	43164280	+	1.03526e-06	0.000169987	54.749
chr1	43166820	43166820	+	4.82179e-07	0.000102025	-59.7436
chr1	43167772	43167772	+	5.98708e-05	0.00249459	51.3187
chr1	43176892	43176892	-	4.84439e-06	0.000476467	54.8682
chr1	43302310	43302310	-	2.43758e-05	0.00138397	-63.9752
chr1	43302841	43302841	+	2.03163e-10	4.76803e-07	-62.8571
chr1	43435021	43435021	+	6.06759e-07	0.000119009	-54.2857
chr1	43524548	43524548	+	0.000167238	0.00488039	-50.3061
chr1	43688083	43688083	-	5.92813e-06	0.000546087	-50.4029
chr1	43730586	43730586	+	4.35528e-06	0.000444049	61.5385
chr1	43813605	43813605	-	8.75629e-08	3.2282e-05	-61.5385
chr1	45069387	45069387	+	4.66439e-05	0.00211639	-50.2463
chr1	45473791	45473791	-	7.10762e-08	2.78705e-05	-68.5897
chr1	45769616	45769616	-	1.47755e-07	4.59785e-05	56.4693
chr1	45769667	45769667	-	2.93251e-07	7.31127e-05	57.1991
chr1	45769673	45769673	-	2.48077e-07	6.53123e-05	57.5394
chr1	45769676	45769676	-	2.48077e-07	6.53123e-05	57.5394
chr1	45769702	45769702	-	3.13698e-11	1.26454e-07	67.8504
chr1	45801456	45801456	+	1.55933e-05	0.00103428	-52.1886
chr1	45889116	45889116	-	0.00073222	0.0126435	51.3043
chr1	45914001	45914001	+	8.99151e-08	3.28739e-05	59.8182
chr1	45926589	45926589	-	2.74763e-08	1.46678e-05	-60.5263
chr1	45926593	45926593	-	7.42447e-07	0.000135932	-57.3257
chr1	46300915	46300915	+	0.000172905	0.00498013	-50.9009
chr1	46343684	46343684	-	5.20604e-06	0.000499917	-56.6061
chr1	46414614	46414614	+	2.71775e-06	0.000324703	-51.1307
chr1	46624024	46624024	-	7.952e-08	3.01732e-05	-57.6029
chr1	46982855	46982855	+	2.13621e-06	0.000276216	51.5931
chr1	48206861	48206861	+	0.000137867	0.00429889	53.1773
chr1	48328124	48328124	+	3.60154e-11	1.41173e-07	-68.75
chr1	48511756	48511756	+	8.87192e-09	6.79668e-06	-59.2593
chr1	48736200	48736200	-	8.19309e-06	0.000674741	-55.2419
chr1	49568441	49568441	-	3.14424e-09	3.297e-06	53.6792
chr1	49741413	49741413	-	4.2342e-08	1.95723e-05	56.6667
chr1	49838089	49838089	+	1.41225e-05	0.000968147	51.4205
chr1	50232342	50232342	+	2.7124e-09	2.98557e-06	-63.0868
chr1	50589124	50589124	-	2.13209e-08	1.23524e-05	-51.1264
chr1	50944944	50944944	-	4.31977e-05	0.00201259	-54.5455
chr1	51225235	51225235	+	1.91291e-07	5.48675e-05	62.5
chr1	51357645	51357645	+	1.45931e-06	0.000213651	54.1311
chr1	51542629	51542629	+	2.10873e-06	0.000273894	-52.1111
chr1	51579584	51579584	-	8.95974e-08	3.2785e-05	53.2222
chr1	51649509	51649509	-	1.02045e-06	0.00016839	67.5953
chr1	51820531	51820531	-	2.51978e-06	0.000308289	-56
chr1	51856379	51856379	+	1.52009e-07	4.69051e-05	54.1667
chr1	51902676	51902676	-	1.03708e-05	0.00078903	-52.9004
chr1	51974680	51974680	+	2.42509e-07	6.43335e-05	-57.5574
chr1	52051686	52051686	+	4.27718e-06	0.000438788	55.1037
chr1	52137604	52137604	-	4.62724e-06	0.000462078	-56.5412
chr1	52149580	52149580	+	0.000282031	0.00684191	50.5792
chr1	52160536	52160536	-	2.31592e-07	6.23369e-05	61.0248
chr1	52168587	52168587	-	0.00011951	0.00392111	51.7857
chr1	52239919	52239919	-	6.79345e-07	0.000127922	55.8824
chr1	52333161	52333161	+	3.30265e-11	1.32164e-07	60.6459
chr1	52354503	52354503	+	7.27493e-06	0.000624175	-53.2915
chr1	52465629	52465629	-	6.00554e-07	0.000118266	54.2468
chr1	52497261	52497261	-	1.31822e-06	0.000199538	-50.4728
chr1	52501755	52501755	+	2.37866e-07	6.35206e-05	-56.1905
chr1	52524946	52524946	-	1.44857e-05	0.000985034	52.0635
chr1	52579911	52579911	-	2.59962e-07	6.73102e-05	56.3636
chr1	52582136	52582136	+	4.5361e-07	9.79874e-05	55.1724
chr1	52655383	52655383	-	1.52558e-06	0.000220217	51.0145
chr1	52672606	52672606	-	7.42168e-06	0.000631632	58.8859
chr1	53761662	53761662	-	8.51684e-06	0.000692823	52.1739
chr1	53787046	53787046	+	1.60326e-06	0.00022797	-58.5714
chr1	53845087	53845087	+	2.67775e-05	0.00147118	-54.232
chr1	54049128	54049128	-	2.24842e-05	0.00131278	-56.5217
chr1	54127919	54127919	-	4.98222e-07	0.000104095	59.1597
chr1	54367326	54367326	-	8.45297e-07	0.000148406	52.1739
chr1	54702442	54702442	-	1.41271e-05	0.000968148	50.4505
chr1	54813433	54813433	-	1.07657e-06	0.000174356	54.8918
chr1	54841384	54841384	+	3.97911e-07	8.98357e-05	-53.2833
chr1	54846871	54846871	+	5.72927e-08	2.39733e-05	52.5036
chr1	54889082	54889082	+	1.49418e-07	4.63222e-05	54.4444
chr1	54889083	54889083	-	1.42714e-06	0.000210402	62.8571
chr1	54927085	54927085	+	1.7459e-05	0.00111342	-58.1197
chr1	54993652	54993652	-	1.51067e-07	4.67404e-05	50.3612
chr1	55050479	55050479	+	0.000199327	0.00546668	-50.4525
chr1	55161010	55161010	+	3.75674e-07	8.64968e-05	52.1154
chr1	55161019	55161019	+	2.41614e-06	0.000299885	50.4787
chr1	55161027	55161027	+	3.28361e-08	1.65097e-05	51.3405
chr1	55677795	55677795	+	2.67713e-06	0.000321307	58.3333
chr1	55688555	55688555	-	2.23525e-06	0.000284899	56.3077
chr1	55701754	55701754	+	1.20584e-10	3.31546e-07	67.9144
chr1	55754953	55754953	-	9.16733e-08	3.33368e-05	-51.752
chr1	55789335	55789335	+	5.97579e-07	0.000117907	-50.0851
chr1	55827129	55827129	-	2.67775e-05	0.00147118	-54.232
chr1	55888189	55888189	-	0.000119727	0.00392434	-50.3686
chr1	55937464	55937464	-	9.36243e-10	1.42655e-06	-70.8472
chr1	56010838	56010838	+	2.5991e-06	0.000314734	-52.4242
chr1	56017634	56017634	-	9.79767e-09	7.28405e-06	62.8655
chr1	56027884	56027884	-	1.15745e-07	3.90874e-05	56.4482
chr1	56407834	56407834	-	7.98767e-07	0.000142818	-54.5556
chr1	56692156	56692156	-	2.80854e-05	0.00151918	52.4217
chr1	56803370	56803370	+	5.67351e-08	2.38306e-05	50.7353
chr1	56847247	56847247	-	1.1054e-06	0.000177595	-53.7177
chr1	57098623	57098623	-	8.88291e-06	0.000712386	-51.8254
chr1	57120492	57120492	-	7.48107e-06	0.000635482	51.9442
chr1	57329444	57329444	+	0.000365122	0.008087	53.5714
chr1	57329871	57329871	-	1.02277e-14	2.48108e-10	68.2624
chr1	57462071	57462071	+	3.94998e-05	0.00190037	-55.9524
chr1	57473423	57473423	+	2.17978e-06	0.000280097	60.0649
chr1	57510710	57510710	-	2.87267e-07	7.2203e-05	54.5977
chr1	57620501	57620501	-	1.95095e-05	0.0011959	54.1667
chr1	57847489	57847489	-	6.9187e-07	0.00012945	-54.9941
chr1	57848312	57848312	+	1.15961e-05	0.000848752	52.6232
chr1	57872476	57872476	+	1.36142e-05	0.000945175	-58.7121
chr1	57970661	57970661	+	4.44823e-06	0.000450156	-57.754
chr1	58144648	58144648	+	1.13995e-05	0.000839116	55.1282
chr1	58163655	58163655	-	4.05022e-05	0.00192926	-52
chr1	58197288	58197288	+	3.64349e-05	0.00180092	-53.1621
chr1	58280475	58280475	+	2.43019e-06	0.000300974	56.9386
chr1	58313490	58313490	-	1.58477e-05	0.00104503	53.8177
chr1	58400915	58400915	+	9.95561e-07	0.000165655	50.709
chr1	58482969	58482969	+	1.71776e-07	5.08949e-05	69.1667
chr1	58651803	58651803	+	4.04696e-08	1.90077e-05	-56.7814
chr1	58910013	58910013	+	9.11489e-06	0.000724623	57.8704
chr1	58910020	58910020	+	4.98222e-07	0.000104095	59.6639
chr1	58912665	58912665	+	1.11026e-06	0.0001782	53.4359
chr1	58959188	58959188	+	1.1632e-06	0.000183624	52.6423
chr1	59164432	59164432	-	5.04024e-08	2.19816e-05	70.2564
chr1	59207732	59207732	-	1.6173e-08	1.02347e-05	-58.0124
chr1	59252314	59252314	-	0.000219933	0.0058316	53.2609
chr1	59270267	59270267	-	1.40264e-07	4.43624e-05	-50.2705
chr1	59310435	59310435	+	8.58126e-08	3.18475e-05	65.5518
chr1	59395383	59395383	-	5.7631e-07	0.000115224	54.6683
chr1	59399725	59399725	-	6.77107e-05	0.00270786	56.9231
chr1	59416202	59416202	-	0.000400197	0.00857854	54.2609
chr1	59437101	59437101	-	2.31327e-08	1.30216e-05	-65.8497
chr1	59437147	59437147	-	2.60451e-06	0.000315134	-54.8128
chr1	59449693	59449693	+	1.74872e-06	0.000241431	56.8182
chr1	59465050	59465050	+	5.68847e-10	9.97623e-07	66.8571
chr1	59484953	59484953	+	8.45295e-06	0.000689387	-51.9915
chr1	59510954	59510954	+	7.176e-07	0.000132669	-57.4855
chr1	59613776	59613776	+	8.44608e-08	3.14945e-05	-55.6522
chr1	60603330	60603330	+	1.92103e-08	1.15412e-05	60.3535
chr1	60745687	60745687	+	3.78547e-07	8.6911e-05	66.5242
chr1	60863232	60863232	+	5.09338e-13	5.73422e-09	-60.1504
chr1	60909077	60909077	-	3.81198e-08	1.82492e-05	-56.4599
chr1	60957652	60957652	-	6.30449e-05	0.00258447	-50.6571
chr1	61157590	61157590	-	9.12533e-07	0.000156112	-53.276
chr1	61205366	61205366	-	2.53546e-06	0.000309546	51.2121
chr1	61205395	61205395	-	9.14264e-07	0.000156323	54.5455
chr1	61263169	61263169	+	6.32609e-08	2.57129e-05	57.6923
chr1	61263647	61263647	-	2.91564e-06	0.000340068	59.042
chr1	61313220	61313220	-	2.83286e-06	0.000333327	53.8171
chr1	61374105	61374105	-	1.13219e-06	0.00018064	-52.2222
chr1	61380002	61380002	+	7.9327e-07	0.000142105	-57.451
chr1	61456382	61456382	+	1.51313e-07	4.67979e-05	61.2903
chr1	61558602	61558602	+	2.58649e-05	0.00143841	-53.5714
chr1	61993356	61993356	+	4.96166e-10	9.06642e-07	-63.0952
chr1	62044183	62044183	+	3.86354e-09	3.7971e-06	55.2632
chr1	62402107	62402107	-	2.75161e-06	0.000327231	-52
chr1	62597256	62597256	-	1.19566e-05	0.000866934	55.4555
chr1	62697764	62697764	-	4.21096e-07	9.33544e-05	58.9571
chr1	62700193	62700193	-	6.38076e-05	0.00260509	-57.4815
chr1	62705786	62705786	-	1.40173e-06	0.000208037	59.0909
chr1	62738391	62738391	+	4.11784e-08	1.92232e-05	-58.2185
chr1	62767510	62767510	-	0.000551332	0.010528	50.4658
chr1	62787700	62787700	+	4.26928e-06	0.000438182	-54.8659
chr1	62787715	62787715	+	2.10018e-06	0.000273114	-53.078
chr1	62788134	62788134	+	1.98452e-06	0.000262927	55.7692
chr1	62792755	62792755	+	5.15877e-07	0.000106729	-56.1448
chr1	62792793	62792793	+	1.18456e-06	0.000185881	-57.4074
chr1	62812968	62812968	-	2.53034e-11	1.09738e-07	65.8551
chr1	63138134	63138134	+	2.32599e-08	1.30746e-05	58.916
chr1	63223429	63223429	-	1.91794e-05	0.00118384	55.336
chr1	63373129	63373129	-	3.74368e-05	0.00183322	-56.4815
chr1	63401938	63401938	-	5.89898e-06	0.000544245	53.75
chr1	63413478	63413478	-	2.57911e-08	1.40301e-05	-58.5034
chr1	63460140	63460140	-	5.83438e-09	5.06961e-06	-55.6842
chr1	63494541	63494541	-	4.2519e-09	4.06884e-06	-55.0528
chr1	63566319	63566319	-	1.00154e-06	0.000166329	-53.9651
chr1	63566654	63566654	+	3.45619e-06	0.000380264	52.5245
chr1	63635426	63635426	+	1.0393e-06	0.000170465	-50.6106
chr1	63896119	63896119	-	9.09607e-08	3.31625e-05	52.2409
chr1	63900612	63900612	-	1.99942e-06	0.000264138	-56.3492
chr1	64055960	64055960	-	7.49407e-08	2.89602e-05	56.1353
chr1	64098277	64098277	+	3.40641e-10	6.91644e-07	-68.7198
chr1	64122798	64122798	+	1.69166e-06	0.0002361	-50.9804
chr1	64138521	64138521	+	6.02105e-05	0.00250422	-51.2821
chr1	64530787	64530787	+	5.33338e-08	2.284e-05	-59.9405
chr1	64578091	64578091	-	3.41266e-07	8.10136e-05	-51.129
chr1	64616391	64616391	-	9.00872e-07	0.000154851	58.2661
chr1	64637600	64637600	-	5.25399e-07	0.000108014	-58.6207
chr1	64642951	64642951	+	3.55043e-08	1.73943e-05	-61.5385
chr1	64719705	64719705	-	3.32467e-05	0.00169852	-53.3333
chr1	64735148	64735148	+	4.03101e-11	1.54702e-07	54.2125
chr1	64886584	64886584	+	3.04278e-07	7.50164e-05	-54.1667
chr1	64975575	64975575	+	1.61069e-09	2.06797e-06	-73.8095
chr1	65052333	65052333	-	4.65969e-07	9.97653e-05	54.902
chr1	65314102	65314102	+	7.9674e-08	3.02059e-05	-58.0645
chr1	65417827	65417827	+	4.55784e-05	0.00208905	53.0146
chr1	65927959	65927959	-	2.79759e-06	0.000330822	52.498
chr1	65927961	65927961	-	2.99428e-06	0.000346085	53.1429
chr1	66228317	66228317	-	3.03788e-05	0.00160025	50.6394
chr1	66232245	66232245	-	9.17121e-07	0.000156654	-50.4985
chr1	66395251	66395251	-	1.27255e-07	4.1568e-05	65.625
chr1	66507445	66507445	-	1.70408e-09	2.14496e-06	71.2169
chr1	66644144	66644144	-	5.01647e-08	2.19005e-05	-57.5
chr1	66671722	66671722	-	1.38525e-09	1.86477e-06	-56.7482
chr1	66678032	66678032	+	1.18681e-05	0.000862205	52.381
chr1	67027084	67027084	+	9.76319e-07	0.00016346	56.6636
chr1	67033597	67033597	-	1.83504e-07	5.33011e-05	-54.9199
chr1	67178586	67178586	+	0.000173462	0.00499255	-58.913
chr1	67366013	67366013	-	2.37809e-05	0.001363	-54.375
chr1	67488444	67488444	-	3.27148e-06	0.000366967	62.3226
chr1	67593985	67593985	+	4.95313e-05	0.00220508	-55.1724
chr1	68527875	68527875	+	1.53188e-07	4.71391e-05	51.5217
chr1	69202664	69202664	-	4.01523e-06	0.000420409	-54.5249
chr1	69447442	69447442	+	4.93335e-07	0.000103451	54.4699
chr1	69507566	69507566	-	7.7382e-08	2.96047e-05	60.7143
chr1	69629840	69629840	-	5.32538e-06	0.00050725	50.4274
chr1	69657094	69657094	-	1.04999e-06	0.000171623	59.7372
chr1	69787540	69787540	-	8.18829e-10	1.2989e-06	-53.1915
chr1	69848369	69848369	+	4.06061e-06	0.000423669	-55.3241
chr1	70272850	70272850	+	2.28044e-07	6.16683e-05	54.3651
chr1	70442307	70442307	-	1.48279e-05	0.00100013	59.7902
chr1	70594300	70594300	-	4.80388e-06	0.000473937	55.7143
chr1	70882125	70882125	+	2.50374e-07	6.56727e-05	-52.9266
chr1	70946120	70946120	+	2.62985e-08	1.42234e-05	66.2896
chr1	71034407	71034407	+	2.51517e-07	6.58885e-05	59.0909
chr1	71103929	71103929	-	2.47373e-11	1.08028e-07	70.1049
chr1	71366621	71366621	-	8.13781e-07	0.000144584	-55.1348
chr1	71373680	71373680	+	2.17183e-07	5.96924e-05	52.808
chr1	71568399	71568399	+	7.21858e-06	0.000621035	52.6455
chr1	71799762	71799762	-	3.09137e-09	3.26091e-06	-56.9399
chr1	71882869	71882869	-	7.10721e-06	0.000615046	52.0879
chr1	72141731	72141731	+	1.31694e-09	1.80427e-06	-71.4286
chr1	72163913	72163913	+	1.64984e-05	0.00107248	51.7857
chr1	72184998	72184998	+	1.70705e-06	0.00023751	-51.3158
chr1	72229679	72229679	-	0.00123186	0.0176024	-55
chr1	72316506	72316506	-	9.1128e-10	1.39965e-06	-73.2517
chr1	72493586	72493586	-	1.77816e-07	5.2061e-05	62.7841
chr1	72499880	72499880	+	3.19114e-08	1.62246e-05	-67.1053
chr1	72504710	72504710	-	5.49557e-05	0.00236065	54.7138
chr1	72535043	72535043	+	2.48573e-07	6.5361e-05	-51.9728
chr1	72540101	72540101	+	4.76781e-06	0.000471571	-55.0435
chr1	72552780	72552780	-	1.18304e-06	0.000185717	-61.1905
chr1	72577980	72577980	+	2.6733e-07	6.86047e-05	60.9063
chr1	72591029	72591029	-	1.08043e-05	0.000810357	-57.1429
chr1	72600176	72600176	-	1.54889e-06	0.000222619	62.788
chr1	72640974	72640974	-	1.96668e-06	0.00026128	60.5714
chr1	72736702	72736702	-	3.58696e-07	8.38548e-05	-51.4493
chr1	72747001	72747001	+	4.31698e-07	9.49301e-05	63.3603
chr1	72836767	72836767	-	7.90811e-05	0.00299359	-50.2174
chr1	72854533	72854533	+	2.82305e-06	0.000332663	-50.9291
chr1	72860487	72860487	-	9.76406e-07	0.00016346	61.6633
chr1	72889118	72889118	+	2.61003e-09	2.90792e-06	-50.0467
chr1	72937290	72937290	+	2.0074e-06	0.000264867	53.0075
chr1	72960370	72960370	+	1.03667e-05	0.000788789	52.3552
chr1	72966262	72966262	-	7.19948e-07	0.000133008	73.8636
chr1	73075956	73075956	-	4.70706e-08	2.09696e-05	57.634
chr1	73273126	73273126	+	3.58582e-07	8.38402e-05	77.2727
chr1	73531246	73531246	+	1.06645e-05	0.000803638	-50.8892
chr1	73545872	73545872	-	9.78085e-06	0.000758448	55.9039
chr1	73547472	73547472	-	8.85016e-05	0.00322249	-52.3551
chr1	73745068	73745068	+	5.89618e-07	0.000116913	-51.8847
chr1	73915356	73915356	-	8.36136e-06	0.000684055	-51.2821
chr1	73937987	73937987	-	6.99753e-07	0.000130396	-64.7335
chr1	73992466	73992466	-	5.57806e-05	0.00238403	-58.4416
chr1	74040745	74040745	+	6.42817e-07	0.000123345	61.0138
chr1	74056516	74056516	-	2.93647e-06	0.000341664	54.8142
chr1	74080457	74080457	-	3.12083e-05	0.00162733	54.2484
chr1	74088375	74088375	+	1.08733e-06	0.000175599	-52.4061
chr1	74106484	74106484	-	8.56842e-06	0.000695527	-58.2418
chr1	74262776	74262776	+	1.43619e-07	4.51285e-05	-50.3175
chr1	74401167	74401167	-	4.08033e-08	1.9116e-05	-65
chr1	74434893	74434893	-	1.91168e-05	0.00118102	53.5714
chr1	74536940	74536940	+	5.67394e-11	1.96047e-07	-53.2941
chr1	74544444	74544444	+	0.000307053	0.00723094	51.9231
chr1	74634329	74634329	-	6.1475e-10	1.05081e-06	-51.3514
chr1	74723203	74723203	-	1.25055e-08	8.58926e-06	-58.6957
chr1	74770264	74770264	+	1.69818e-05	0.00109323	50.8258
chr1	74788392	74788392	+	4.71761e-08	2.09977e-05	-55.945
chr1	74830276	74830276	+	5.67688e-06	0.000529694	-55.4367
chr1	74830343	74830343	+	1.83943e-06	0.000249649	-51.5556
chr1	74852773	74852773	+	6.77107e-05	0.00270786	56.9444
chr1	74900067	74900067	-	7.94115e-06	0.000661367	-55.5556
chr1	74903400	74903400	-	1.75303e-07	5.15825e-05	55.1932
chr1	74921215	74921215	+	2.88004e-06	0.000337292	-58.2051
chr1	74926989	74926989	+	1.6871e-09	2.13318e-06	68.3673
chr1	74957232	74957232	+	1.36834e-08	9.11804e-06	-60.8333
chr1	75029038	75029038	+	9.30736e-05	0.00332937	-51.3072
chr1	75241106	75241106	-	2.21674e-07	6.05146e-05	-50.1603
chr1	75244384	75244384	-	6.06156e-06	0.000553985	57.5758
chr1	75257443	75257443	-	3.31672e-06	0.000369818	-53.9609
chr1	75342000	75342000	+	7.79236e-10	1.25188e-06	63.0435
chr1	75384952	75384952	+	1.37673e-05	0.000952217	52.3707
chr1	75393515	75393515	+	2.27457e-09	2.62935e-06	-79.912
chr1	75393523	75393523	+	3.90586e-07	8.87218e-05	-66.4773
chr1	75485692	75485692	-	7.88107e-11	2.44483e-07	-72.0947
chr1	75493880	75493880	+	0.00038971	0.00843164	-50.9565
chr1	75493883	75493883	+	0.000242292	0.00619772	-51.3043
chr1	75499672	75499672	-	4.02625e-05	0.00192288	-52.0833
chr1	75529127	75529127	+	1.28979e-08	8.76574e-06	-57.5758
chr1	75603323	75603323	-	8.93323e-07	0.000153939	65.2605
chr1	75840179	75840179	-	1.04172e-07	3.63849e-05	-55.0117
chr1	75945307	75945307	-	1.61588e-05	0.00105796	-53.4949
chr1	76046984	76046984	-	3.83935e-07	8.77407e-05	-68.5835
chr1	76117690	76117690	-	3.31474e-06	0.000369659	50.1491
chr1	76168272	76168272	+	5.47821e-06	0.000517108	-52.549
chr1	76276327	76276327	-	6.24104e-07	0.000121089	50.1462
chr1	76586391	76586391	+	1.01035e-07	3.56076e-05	56.6986
chr1	76760522	76760522	-	4.36288e-08	1.99348e-05	-50.6356
chr1	77295756	77295756	-	9.4894e-05	0.00336951	54.3704
chr1	77320787	77320787	+	8.01357e-06	0.000665799	-57.1746
chr1	77370665	77370665	+	1.0539e-05	0.000797952	58.5507
chr1	77389834	77389834	-	1.45051e-05	0.000985808	-53.3333
chr1	77391707	77391707	-	1.73801e-07	5.13018e-05	54.1699
chr1	77432868	77432868	+	5.36834e-05	0.00232544	57.0968
chr1	77446352	77446352	+	6.60511e-06	0.000586588	56.1026
chr1	77521784	77521784	-	9.27881e-06	0.00073277	53.9108
chr1	77656245	77656245	+	9.6455e-09	7.205e-06	-73.0812
chr1	77708347	77708347	+	8.54468e-08	3.17539e-05	50.9322
chr1	77885382	77885382	-	4.10043e-08	1.91755e-05	-52.9078
chr1	78066325	78066325	-	1.28463e-08	8.74153e-06	-51.0285
chr1	78081920	78081920	-	2.8041e-07	7.10335e-05	-59.7674
chr1	78082037	78082037	-	6.5606e-07	0.000124937	-60.114
chr1	78113506	78113506	-	7.55645e-06	0.000639996	52.9412
chr1	78199626	78199626	-	1.57504e-08	1.00453e-05	-58.167
chr1	78338062	78338062	-	2.02151e-05	0.00122543	56.973
chr1	78408551	78408551	-	8.85585e-11	2.65733e-07	55.1613
chr1	78526334	78526334	+	1.17448e-06	0.000184735	51.7886
chr1	78570256	78570256	-	2.84302e-10	6.06625e-07	62.963
chr1	78572797	78572797	-	2.07657e-06	0.000271141	55.3226
chr1	78594171	78594171	-	4.04684e-08	1.90077e-05	59.3491
chr1	78651534	78651534	-	3.62579e-06	0.00039271	56.9231
chr1	78688286	78688286	-	9.24345e-06	0.000731176	58.8889
chr1	78812066	78812066	-	1.22717e-08	8.47094e-06	-65.7143
chr1	78902125	78902125	-	2.60064e-05	0.00144386	51.5
chr1	78966488	78966488	+	2.16244e-05	0.00128029	52.9825
chr1	79048183	79048183	-	8.4542e-06	0.000689444	57.9121
chr1	79336133	79336133	+	3.66368e-07	8.49836e-05	72
chr1	79406526	79406526	-	1.21802e-08	8.42233e-06	60
chr1	79634343	79634343	-	1.31789e-07	4.25216e-05	-55
chr1	79713918	79713918	-	1.01784e-10	2.94962e-07	-53.6733
chr1	79751136	79751136	+	5.89898e-06	0.000544245	53.1274
chr1	79753033	79753033	+	3.47356e-07	8.20152e-05	-55.5556
chr1	79842421	79842421	-	2.41127e-09	2.73353e-06	-56.6047
chr1	79914809	79914809	+	5.4527e-06	0.000515518	53.1304
chr1	79932743	79932743	+	4.00932e-08	1.89061e-05	55.873
chr1	79944444	79944444	+	5.97242e-05	0.00249061	50.3344
chr1	79949504	79949504	-	1.42869e-06	0.000210521	57.9487
chr1	79959427	79959427	-	8.82124e-14	1.41718e-09	75
chr1	80199520	80199520	-	9.27854e-07	0.000157953	-62.1849
chr1	80208869	80208869	+	1.19941e-06	0.000187359	-65.3846
chr1	80218513	80218513	-	7.83232e-08	2.98481e-05	60.9023
chr1	80298416	80298416	+	6.91692e-05	0.0027439	50.463
chr1	80533256	80533256	+	9.16732e-06	0.000727219	-57.3118
chr1	80533818	80533818	+	4.21869e-12	2.84825e-08	66.0684
chr1	80555803	80555803	-	0.00027905	0.00679515	-50.7123
chr1	80645171	80645171	-	1.15049e-06	0.000182526	53.125
chr1	80675249	80675249	+	3.78852e-06	0.000404339	-52.9677
chr1	80839902	80839902	+	3.5398e-06	0.000386536	-51.7137
chr1	81077663	81077663	-	2.01841e-05	0.00122419	57.1429
chr1	81088435	81088435	+	1.73624e-08	1.07356e-05	-58.5366
chr1	81127285	81127285	-	3.72232e-07	8.58777e-05	63.8889
chr1	81225071	81225071	+	0.000323595	0.0074777	54.2308
chr1	81521865	81521865	-	3.1736e-08	1.6183e-05	-54.4255
chr1	81521934	81521934	+	2.51067e-05	0.00141068	51.5238
chr1	81674974	81674974	+	1.7822e-05	0.00112846	-65.7143
chr1	81997686	81997686	+	2.48733e-08	1.36847e-05	-57.7778
chr1	82244032	82244032	+	1.0869e-05	0.000813767	55.303
chr1	82320911	82320911	+	3.71282e-07	8.57575e-05	-54.4418
chr1	82320950	82320950	+	1.38703e-06	0.000206621	-54.922
chr1	82364602	82364602	-	7.91254e-07	0.000141928	52.5586
chr1	82486696	82486696	-	9.10177e-07	0.00015583	-63.7419
chr1	82527525	82527525	-	1.1915e-06	0.00018656	-57.6805
chr1	82603895	82603895	+	4.75694e-07	0.000101151	62.9503
chr1	82720061	82720061	+	1.16969e-06	0.000184265	-52.99
chr1	82773150	82773150	-	9.49788e-09	7.12616e-06	52.6316
chr1	82801578	82801578	-	1.0152e-05	0.000777777	50.0556
chr1	82992923	82992923	-	2.82732e-06	0.000333032	-58.7284
chr1	83047573	83047573	+	2.79076e-05	0.00151326	-50.4472
chr1	83164718	83164718	+	0.000160943	0.00475801	-50.9259
chr1	83169514	83169514	+	2.61513e-05	0.00144865	-52.0624
chr1	83276619	83276619	-	1.77935e-06	0.000244129	-53.5461
chr1	83554261	83554261	-	3.7953e-06	0.000404864	-52.1073
chr1	83749297	83749297	-	5.23956e-08	2.26009e-05	65.5172
chr1	84414664	84414664	-	5.95922e-05	0.00248722	-57.4074
chr1	84557218	84557218	-	1.1094e-07	3.79361e-05	-50.6944
chr1	84646601	84646601	+	8.2097e-06	0.000675929	54.9872
chr1	84890657	84890657	-	3.09726e-09	3.26294e-06	52.2354
chr1	84985079	84985079	+	1.0995e-06	0.000176957	51.7241
chr1	85199540	85199540	-	0.000365122	0.008087	53.0303
chr1	85205077	85205077	-	3.01344e-10	6.32873e-07	-75.8559
chr1	85266270	85266270	+	1.45229e-09	1.92442e-06	55.3279
chr1	85528717	85528717	+	1.05394e-09	1.54827e-06	69.4444
chr1	85548045	85548045	-	4.62724e-06	0.000462078	57.2595
chr1	85548143	85548143	-	2.90534e-07	7.2678e-05	61.1498
chr1	85647253	85647253	+	9.63033e-06	0.000751051	56
chr1	85718331	85718331	-	4.77301e-08	2.11608e-05	69.2308
chr1	85827417	85827417	+	3.73818e-08	1.80016e-05	-67.1769
chr1	85907579	85907579	-	1.78347e-07	5.21749e-05	-56.4935
chr1	85921427	85921427	-	2.168e-09	2.54356e-06	-60.4743
chr1	85987756	85987756	-	1.07325e-07	3.71324e-05	52.7273
chr1	86022300	86022300	-	1.59353e-09	2.05588e-06	-75.1795
chr1	86047620	86047620	-	2.5569e-05	0.00142738	54.5
chr1	86221777	86221777	-	3.32467e-05	0.00169852	52.9885
chr1	86240036	86240036	+	3.16606e-08	1.61601e-05	50.4906
chr1	86243841	86243841	-	3.2455e-08	1.63893e-05	54.717
chr1	86298454	86298454	+	3.15869e-05	0.00164068	-50.6272
chr1	86365487	86365487	-	1.37346e-06	0.000205252	-56
chr1	86389892	86389892	-	1.23612e-07	4.07921e-05	-62.963
chr1	86565431	86565431	+	6.78073e-07	0.000127784	64.1827
chr1	87047225	87047225	+	5.24248e-05	0.00229079	50.974
chr1	87173666	87173666	-	6.61629e-10	1.11392e-06	-59.4783
chr1	87185929	87185929	-	0.00012246	0.00398194	-55.625
chr1	87501420	87501420	-	2.20386e-05	0.00129692	50.9286
chr1	87629801	87629801	-	2.16614e-07	5.95841e-05	58.9606
chr1	87672095	87672095	-	0.000162619	0.00479168	-51.0559
chr1	87933356	87933356	+	9.83737e-06	0.000761208	51.8576
chr1	87933367	87933367	+	1.34531e-06	0.000202432	58.3615
chr1	88116991	88116991	+	2.30169e-08	1.29797e-05	62.5
chr1	88208290	88208290	+	2.03392e-09	2.43758e-06	-53.9316
chr1	88248450	88248450	-	2.32187e-10	5.22533e-07	-61.7647
chr1	88325424	88325424	+	1.8007e-05	0.00113674	52.834
chr1	88465673	88465673	+	3.52191e-08	1.73182e-05	57.4737
chr1	88476992	88476992	-	9.85623e-15	2.42383e-10	-65.6863
chr1	88543406	88543406	+	5.68409e-07	0.000114085	63.4245
chr1	88579695	88579695	+	1.56013e-05	0.00103454	50.303
chr1	88650200	88650200	+	5.28344e-09	4.73193e-06	59.4268
chr1	88721446	88721446	-	3.92668e-12	2.70502e-08	56.9048
chr1	88791733	88791733	-	3.21327e-06	0.000362474	-50.8282
chr1	88794547	88794547	-	1.62158e-06	0.000229592	60.6229
chr1	88937199	88937199	+	8.51753e-06	0.00069284	-55.7143
chr1	88976522	88976522	-	1.19566e-05	0.000866934	-54.3137
chr1	88984979	88984979	+	1.40087e-09	1.87949e-06	-63.8298
chr1	89005615	89005615	-	1.82184e-05	0.00114463	-50.2551
chr1	89082640	89082640	+	1.51531e-08	9.80639e-06	54.2353
chr1	89092253	89092253	-	1.09237e-05	0.00081595	53.3333
chr1	89104600	89104600	-	1.48858e-05	0.00100281	51.838
chr1	89106497	89106497	-	1.36155e-05	0.000945192	-50.2137
chr1	89116736	89116736	+	1.0995e-06	0.000176957	-51.7241
chr1	89131170	89131170	+	3.56133e-09	3.59239e-06	55.127
chr1	89150961	89150961	-	1.54634e-06	0.00022236	-52.9412
chr1	89249471	89249471	-	6.06899e-06	0.000554432	-59.5571
chr1	89332957	89332957	-	2.42728e-05	0.00138027	-51.0417
chr1	89394900	89394900	+	2.40192e-09	2.72715e-06	-75
chr1	89441898	89441898	+	3.97492e-07	8.9792e-05	-61.4983
chr1	89458055	89458055	-	6.34815e-11	2.11699e-07	71.583
chr1	89499381	89499381	-	6.62968e-06	0.000587868	50.4284
chr1	89503615	89503615	+	0.000132803	0.00419396	52.6667
chr1	89517963	89517963	-	2.39213e-05	0.00136813	-54.158
chr1	89579012	89579012	-	1.42554e-05	0.000974789	54.7619
chr1	89587516	89587516	-	4.8011e-09	4.42554e-06	55.2266
chr1	89618869	89618869	-	8.51745e-13	8.78065e-09	71.6083
chr1	89676519	89676519	+	2.03336e-07	5.70203e-05	53.7815
chr1	89680543	89680543	+	3.14308e-06	0.00035655	52.1154
chr1	89755844	89755844	-	2.11067e-10	4.89005e-07	62.585
chr1	89784183	89784183	-	1.71366e-06	0.000238181	55.6478
chr1	89847435	89847435	+	1.1087e-09	1.607e-06	77.6018
chr1	89860987	89860987	+	1.84112e-05	0.00115142	51.2088
chr1	89972092	89972092	-	3.32467e-05	0.00169852	-53.3333
chr1	89996443	89996443	-	1.12724e-06	0.000180138	51.3889
chr1	90017617	90017617	-	2.70855e-06	0.000324019	54.697
chr1	90045806	90045806	+	5.09204e-10	9.22425e-07	-54.7009
chr1	90046173	90046173	-	2.12087e-08	1.23085e-05	-67.6344
chr1	90060221	90060221	+	3.44551e-08	1.70665e-05	64.8496
chr1	90077181	90077181	+	4.63076e-06	0.000462273	-54.5455
chr1	90123023	90123023	-	5.33579e-06	0.00050784	57.5758
chr1	90208830	90208830	+	1.73192e-08	1.07197e-05	-51.3332
chr1	90216068	90216068	+	5.06969e-08	2.20737e-05	-56.0976
chr1	90286661	90286661	+	1.34753e-05	0.000938497	51.5152
chr1	90368716	90368716	+	2.9538e-10	6.2392e-07	-56.1001
chr1	90382536	90382536	-	5.25039e-05	0.00229255	-51.0989
chr1	90398399	90398399	-	4.05022e-05	0.00192926	52
chr1	90398410	90398410	-	2.94161e-05	0.00156686	54.1667
chr1	90470809	90470809	-	1.79843e-10	4.40546e-07	52.6967
chr1	90572629	90572629	+	1.40569e-06	0.000208363	64.4138
chr1	90572654	90572654	+	1.16211e-06	0.000183507	62.9588
chr1	90572699	90572699	+	2.19052e-07	5.99959e-05	62.7042
chr1	90577248	90577248	+	3.84417e-10	7.53421e-07	66.6667
chr1	90601602	90601602	+	3.70106e-09	3.67762e-06	56.7203
chr1	90781971	90781971	-	6.14441e-08	2.52106e-05	-57.2154
chr1	90820859	90820859	+	0.000122561	0.0039835	52.1531
chr1	90945397	90945397	-	0.000285504	0.00689385	-56.4394
chr1	91058058	91058058	+	3.60459e-06	0.000391271	-53.2353
chr1	91061061	91061061	-	8.19292e-13	8.50585e-09	-73.8095
chr1	91142643	91142643	-	1.57632e-07	4.80631e-05	-59.0909
chr1	91231252	91231252	-	1.21458e-05	0.000876091	57.8063
chr1	91243599	91243599	+	3.62352e-07	8.44151e-05	-53.607
chr1	91283483	91283483	-	1.64663e-07	4.95378e-05	-52.7778
chr1	91344649	91344649	+	1.08968e-07	3.74949e-05	-52
chr1	91345656	91345656	-	4.80384e-08	2.12525e-05	-54.7475
chr1	91373126	91373126	-	2.26486e-09	2.62111e-06	77.7512
chr1	91373134	91373134	-	3.55591e-07	8.34111e-05	70.4545
chr1	91435712	91435712	-	1.46695e-05	0.000993436	-53.9171
chr1	91435717	91435717	-	0.000151246	0.00456401	-55.5556
chr1	91602736	91602736	-	1.43351e-07	4.50731e-05	-60.7143
chr1	91616320	91616320	-	1.38426e-05	0.000955552	-53.125
chr1	91623245	91623245	-	2.0363e-05	0.00123124	55.3872
chr1	91685917	91685917	+	2.5757e-05	0.00143473	50.3846
chr1	91693340	91693340	+	1.79503e-06	0.000245449	54.9451
chr1	91800441	91800441	-	6.45085e-07	0.000123656	55.7971
chr1	91800469	91800469	-	3.54102e-08	1.73656e-05	63.0499
chr1	91820756	91820756	+	3.28103e-10	6.72155e-07	-67.7653
chr1	91900160	91900160	-	1.2038e-08	8.35841e-06	60
chr1	91942773	91942773	+	3.48344e-05	0.00175007	-52.6361
chr1	92201303	92201303	-	4.9486e-07	0.000103682	-51.0204
chr1	92212623	92212623	-	3.77623e-06	0.000403387	50.4435
chr1	92343989	92343989	-	5.33294e-05	0.00231588	-52.2113
chr1	92348440	92348440	-	1.76031e-05	0.00111956	-57.0175
chr1	92469688	92469688	-	3.26461e-06	0.000366458	-54.7619
chr1	92483400	92483400	+	8.7591e-07	0.000152141	56.5268
chr1	92516850	92516850	+	4.19359e-06	0.000432824	53.0303
chr1	92522668	92522668	-	3.49904e-05	0.00175572	54.4008
chr1	92652177	92652177	-	1.00824e-08	7.41283e-06	-65.8974
chr1	92923080	92923080	+	0.000191401	0.00532808	-52.9762
chr1	92929675	92929675	-	1.2331e-07	4.07694e-05	-50.9009
chr1	92981170	92981170	+	5.87928e-07	0.000116646	63.6853
chr1	92985340	92985340	-	2.13318e-08	1.23571e-05	59.7367
chr1	92991281	92991281	+	5.55183e-06	0.000521518	50.4762
chr1	92994023	92994023	-	1.01574e-06	0.000167845	-56.1625
chr1	93002017	93002017	+	1.77997e-05	0.00112744	-55.2593
chr1	93019917	93019917	-	2.92697e-07	7.30636e-05	-53.4314
chr1	93037624	93037624	-	6.50184e-07	0.000124259	-56.8182
chr1	93051384	93051384	-	3.62352e-07	8.44151e-05	53.607
chr1	93081583	93081583	-	6.71702e-05	0.00269331	50.8097
chr1	93170359	93170359	-	1.90176e-06	0.000255306	-56.9923
chr1	93205761	93205761	+	1.24619e-05	0.000891222	52.5463
chr1	93351519	93351519	-	1.78017e-06	0.000244194	-58.3973
chr1	93372194	93372194	-	1.78382e-06	0.000244421	-50.7212
chr1	93372976	93372976	-	1.06645e-05	0.000803638	-50.8892
chr1	93402435	93402435	-	1.11484e-08	7.89488e-06	-51.6129
chr1	93513493	93513493	-	2.79759e-06	0.000330822	-59.2969
chr1	93668153	93668153	-	6.51209e-05	0.00263992	-53.349
chr1	93994045	93994045	+	1.13168e-13	1.74793e-09	68.5455
chr1	94168889	94168889	-	4.24545e-07	9.39108e-05	-50.9726
chr1	94585450	94585450	-	4.43492e-06	0.000449222	-52.3077
chr1	95100913	95100913	+	2.58981e-10	5.6661e-07	-57.9184
chr1	95315091	95315091	-	2.70131e-06	0.000323398	-61.3506
chr1	95332612	95332612	-	0.000837669	0.0137816	51.4286
chr1	95341983	95341983	-	6.1186e-07	0.000119568	-57.8947
chr1	95774798	95774798	+	2.53906e-05	0.00142177	59.0659
chr1	95937171	95937171	-	1.85099e-08	1.12479e-05	-66.8718
chr1	96159211	96159211	-	8.50616e-05	0.00313959	51.0417
chr1	96271032	96271032	+	5.27465e-07	0.000108286	51.7455
chr1	96392534	96392534	-	1.70081e-11	8.11237e-08	-62.2703
chr1	96802804	96802804	-	0.000221699	0.00585732	56.5217
chr1	96931729	96931729	+	1.59963e-05	0.00105145	50.6061
chr1	96965286	96965286	+	6.49972e-06	0.000580578	55.614
chr1	97019468	97019468	-	0.000250619	0.00633856	-55.7692
chr1	97135599	97135599	+	6.13205e-05	0.00253642	-54.5455
chr1	97409462	97409462	-	1.77914e-06	0.000244107	-60.1399
chr1	97657848	97657848	+	1.18241e-05	0.00086009	-59.7059
chr1	97711387	97711387	+	5.75675e-06	0.000535041	50.7317
chr1	97924642	97924642	+	6.1018e-09	5.2226e-06	-66.014
chr1	98015042	98015042	-	9.73247e-06	0.000755801	-57.1895
chr1	98098248	98098248	-	1.46025e-05	0.000990532	-55.7692
chr1	98098312	98098312	-	9.32767e-08	3.37359e-05	-54.0465
chr1	98098334	98098334	-	4.0788e-09	3.94089e-06	-59.1047
chr1	98476708	98476708	-	7.74269e-06	0.000650672	-53.9589
chr1	99765092	99765092	-	6.1856e-07	0.000120305	-55.1724
chr1	99913063	99913063	+	2.12016e-08	1.23085e-05	59.5238
chr1	100021984	100021984	-	1.50288e-10	3.88926e-07	64.7059
chr1	100066391	100066391	+	5.45e-11	1.89799e-07	62.8571
chr1	100271758	100271758	-	7.29329e-05	0.00284205	-53.5714
chr1	100418597	100418597	-	4.65094e-06	0.000463646	-54.0698
chr1	100662343	100662343	+	1.31026e-06	0.000198778	53.908
chr1	100664401	100664401	-	2.73791e-05	0.00149405	59.3043
chr1	100782725	100782725	+	8.77231e-07	0.000152262	50.4209
chr1	100783306	100783306	-	9.32914e-07	0.000158588	-54.5966
chr1	101092888	101092888	-	7.88368e-07	0.000141561	56.5217
chr1	101452707	101452707	+	3.15446e-05	0.00163902	-57.3333
chr1	101667044	101667044	-	2.34524e-07	6.2903e-05	-56.0606
chr1	101813070	101813070	+	7.28668e-06	0.000624793	-58.069
chr1	101843276	101843276	-	9.55134e-06	0.000746636	-50.8333
chr1	102182646	102182646	+	1.1932e-07	3.98878e-05	-56.1208
chr1	103619095	103619095	-	3.71995e-09	3.6923e-06	-57.7778
chr1	104062250	104062250	-	5.22855e-06	0.000500899	53.0702
chr1	104606112	104606112	+	9.71852e-08	3.46625e-05	53.1977
chr1	104767426	104767426	+	2.67411e-06	0.000321068	-51.1312
chr1	104833288	104833288	-	7.35438e-10	1.19947e-06	61.8806
chr1	105498694	105498694	-	1.49441e-07	4.63262e-05	53.7167
chr1	105498698	105498698	-	7.93166e-09	6.26836e-06	58.156
chr1	105805762	105805762	-	1.80591e-10	4.40825e-07	64.2857
chr1	105859332	105859332	-	4.3217e-08	1.9798e-05	51.8419
chr1	105911691	105911691	+	1.03119e-05	0.00078584	-51.0367
chr1	105963882	105963882	+	6.7189e-06	0.000593008	-60.3175
chr1	106158761	106158761	-	9.12182e-06	0.000724902	55.5455
chr1	106160575	106160575	+	4.82962e-10	8.88786e-07	-62.5858
chr1	106283822	106283822	+	7.7382e-08	2.96047e-05	-60.7143
chr1	106418754	106418754	+	6.99693e-06	0.000609216	57.3333
chr1	106476738	106476738	-	5.36095e-09	4.7848e-06	-62.5676
chr1	106536538	106536538	+	6.03318e-07	0.000118629	58.8432
chr1	106637115	106637115	-	4.36705e-05	0.00202853	52.1978
chr1	106758634	106758634	-	4.14594e-06	0.000429638	50.2674
chr1	106836704	106836704	-	1.01532e-06	0.000167801	-63.3333
chr1	106861110	106861110	-	1.86195e-06	0.000251803	61.7582
chr1	106880313	106880313	+	6.39186e-08	2.59109e-05	-54.7619
chr1	106929639	106929639	+	1.0393e-06	0.000170465	50.6106
chr1	106956918	106956918	-	6.71702e-05	0.00269331	-51.4872
chr1	106996358	106996358	+	1.64664e-06	0.000231979	-56.9118
chr1	107485471	107485471	+	2.33761e-06	0.000293658	50.9868
chr1	108214696	108214696	+	5.82443e-07	0.000115934	-55.5229
chr1	108303937	108303937	-	1.84738e-05	0.00115381	62.3077
chr1	108703081	108703081	+	5.31e-05	0.00230929	52
chr1	108849332	108849332	+	1.28203e-10	3.44483e-07	57.8125
chr1	110985582	110985582	+	5.4425e-06	0.000514797	55.5288
chr1	111572653	111572653	-	1.03821e-05	0.000789655	-58.2609
chr1	111807579	111807579	-	5.28845e-07	0.000108468	-55.4268
chr1	111826277	111826277	+	3.73995e-06	0.000401118	53.125
chr1	112378052	112378052	-	0.000545753	0.0104584	50.8361
chr1	112410075	112410075	+	9.31292e-05	0.00333064	-50.4049
chr1	112450635	112450635	-	4.89645e-05	0.00218886	55.0481
chr1	112860476	112860476	+	2.12405e-06	0.000275169	52
chr1	113578604	113578604	+	6.19539e-06	0.000562166	-58.3333
chr1	113742610	113742610	-	1.28288e-05	0.0009086	50.6536
chr1	113798744	113798744	+	0.000118761	0.00390347	53.4759
chr1	114290907	114290907	-	2.80875e-09	3.05585e-06	74.6032
chr1	114301161	114301161	+	9.24629e-06	0.000731348	54.065
chr1	114528314	114528314	-	2.3825e-07	6.35923e-05	-50.1144
chr1	114528437	114528437	-	4.06061e-06	0.000423669	55.3241
chr1	114895989	114895989	-	1.20201e-05	0.000869845	-52.9186
chr1	115121405	115121405	-	1.2101e-10	3.31889e-07	-75.3488
chr1	115496212	115496212	+	7.52602e-12	4.46485e-08	69.6325
chr1	115696129	115696129	-	9.69594e-07	0.000162793	-52.9777
chr1	115705290	115705290	+	2.28844e-07	6.1824e-05	-51.3636
chr1	115827350	115827350	-	8.47619e-17	3.76886e-12	-75.4121
chr1	116246511	116246511	+	1.77051e-08	1.08812e-05	52.729
chr1	116618933	116618933	-	2.06424e-06	0.000270027	54.5455
chr1	116982651	116982651	+	3.31046e-05	0.00169358	57.25
chr1	117743884	117743884	-	1.22791e-11	6.42711e-08	69.4478
chr1	118199262	118199262	-	1.7459e-05	0.00111342	-59.2593
chr1	118456535	118456535	-	9.20721e-05	0.00330588	50.8929
chr1	118701109	118701109	-	6.31019e-06	0.000569436	-53.6806
chr1	118739107	118739107	-	8.774e-09	6.74633e-06	-67.7419
chr1	118746928	118746928	+	5.06626e-05	0.00223755	52.7056
chr1	118778991	118778991	+	7.81661e-06	0.000654539	56.8826
chr1	118836854	118836854	-	4.77158e-07	0.000101349	57.5758
chr1	118865319	118865319	-	2.243e-07	6.10159e-05	51.7241
chr1	118878580	118878580	+	2.42728e-05	0.00138027	-51.0417
chr1	119114157	119114157	-	0.000197536	0.00543516	-51.8519
chr1	119138080	119138080	+	7.94115e-06	0.000661367	-55.5556
chr1	119213185	119213185	-	4.89683e-06	0.000479929	53.5484
chr1	119220738	119220738	+	2.77285e-07	7.04488e-05	-57.1429
chr1	119227116	119227116	+	0.000257085	0.00644315	-51.0695
chr1	119292345	119292345	+	1.88622e-08	1.13896e-05	65.2422
chr1	119335449	119335449	-	1.94015e-07	5.53818e-05	-59.2857
chr1	119417486	119417486	+	5.31114e-07	0.000108797	55.4779
chr1	119456748	119456748	+	1.28399e-07	4.17773e-05	-67.7419
chr1	119510971	119510971	-	7.40243e-07	0.000135647	56.875
chr1	119511104	119511104	-	3.1049e-06	0.000353781	53.7263
chr1	119643410	119643410	+	1.42986e-08	9.38667e-06	54.5455
chr1	119937037	119937037	-	1.06034e-07	3.68309e-05	50.9434
chr1	119991452	119991452	-	3.21274e-05	0.0016595	53.6232
chr1	119991704	119991704	-	1.07456e-07	3.71664e-05	-50.5882
chr1	120041557	120041557	-	6.54869e-06	0.000583478	-60.7143
chr1	120069770	120069770	+	8.2986e-05	0.00308752	51.049
chr1	120246204	120246204	-	3.62144e-05	0.00179387	57.2917
chr1	120276391	120276391	-	1.23255e-09	1.71997e-06	57.7193
chr1	120311186	120311186	-	1.40605e-07	4.44337e-05	-54.9442
chr1	120330893	120330893	+	2.4308e-05	0.00138152	52.5
chr1	120405121	120405121	+	9.41432e-10	1.43198e-06	58.2712
chr1	120461954	120461954	-	4.72196e-10	8.73722e-07	-75.7576
chr1	120498206	120498206	+	5.04206e-06	0.000489436	58.6207
chr1	120592531	120592531	+	1.00035e-11	5.52819e-08	-67.2111
chr1	120920433	120920433	-	1.52415e-08	9.83163e-06	59.2593
chr1	120921854	120921854	-	2.24933e-07	6.11425e-05	73.2323
chr1	120930216	120930216	+	7.27354e-09	5.90476e-06	56.2753
chr1	120962068	120962068	+	1.10269e-10	3.11974e-07	-75.8621
chr1	121167398	121167398	+	2.01984e-08	1.19265e-05	-54.059
chr1	121418323	121418323	-	1.38945e-08	9.20854e-06	-51.0854
chr1	121441404	121441404	+	3.20634e-06	0.000361874	-59.7701
chr1	121479547	121479547	-	2.19072e-08	1.25894e-05	-52.9601
chr1	121919079	121919079	+	5.64443e-10	9.9267e-07	-62.0551
chr1	122037670	122037670	+	2.07731e-05	0.00124723	52.0221
chr1	122084619	122084619	+	2.58704e-05	0.00143865	-51.9713
chr1	122846686	122846686	+	9.62748e-09	7.19886e-06	-52.5
chr1	122884439	122884439	-	5.46139e-08	2.32246e-05	-50.8578
chr1	122931800	122931800	-	1.65274e-05	0.0010739	-51.25
chr1	123059237	123059237	+	5.29254e-11	1.85859e-07	-72.1576
chr1	123825647	123825647	+	1.41982e-07	4.47195e-05	56.4565
chr1	124231309	124231309	+	7.65843e-08	2.93935e-05	-59.3434
chr1	124771548	124771548	-	5.38422e-08	2.29974e-05	-53.1316
chr1	125020387	125020387	+	8.18855e-07	0.000145251	-54.8387
chr1	125027872	125027872	-	2.21073e-05	0.00129909	55.5
chr1	125046886	125046886	-	1.40264e-07	4.43624e-05	-53.9474
chr1	125323963	125323963	-	9.888e-07	0.000164811	50.2902
chr1	125575568	125575568	-	6.25918e-07	0.000121249	52
chr1	125945133	125945133	-	8.38577e-11	2.55731e-07	66.7391
chr1	125993484	125993484	+	2.30852e-06	0.000291311	54.2857
chr1	125996920	125996920	-	6.42135e-09	5.3923e-06	-61.7691
chr1	126024850	126024850	+	1.41583e-08	9.32156e-06	55.1916
chr1	126085984	126085984	-	7.96243e-07	0.000142486	60
chr1	126099383	126099383	-	2.97726e-09	3.17955e-06	70.1188
chr1	126111162	126111162	+	1.78853e-06	0.000244809	-54.8857
chr1	126242392	126242392	+	2.70386e-06	0.000323646	62.6551
chr1	126558242	126558242	-	1.56695e-08	1.00128e-05	-57.6087
chr1	126634231	126634231	-	1.42838e-06	0.000210493	-59.9432
chr1	126735951	126735951	-	1.5282e-06	0.000220415	-53.697
chr1	126973314	126973314	+	2.40505e-12	1.85884e-08	-66.2815
chr1	127001121	127001121	+	5.40264e-08	2.30581e-05	-71.1801
chr1	127007610	127007610	-	1.38426e-05	0.000955552	53.125
chr1	127266735	127266735	+	2.10251e-06	0.000273352	-55.5556
chr1	127338043	127338043	-	9.99327e-07	0.000166039	56.3121
chr1	127444667	127444667	+	7.53994e-07	0.000137309	-60.1852
chr1	127508639	127508639	-	2.48081e-06	0.000305026	-67.9487
chr1	127589318	127589318	-	1.02279e-05	0.000781903	51.5638
chr1	127750360	127750360	+	0.000686201	0.0121343	-52.381
chr1	127850350	127850350	-	5.17763e-08	2.24129e-05	-52.561
chr1	128288085	128288085	+	6.46929e-07	0.000123928	50.4607
chr1	128295426	128295426	-	5.14745e-07	0.000106591	-56.9565
chr1	128334112	128334112	-	1.44968e-06	0.000212573	55
chr1	128369836	128369836	-	2.0947e-05	0.00125444	54.2596
chr1	128539395	128539395	+	1.62772e-10	4.09437e-07	71.371
chr1	128643703	128643703	+	1.59484e-12	1.36716e-08	57.1693
chr1	128735578	128735578	+	2.23087e-07	6.0776e-05	56.6667
chr1	128805770	128805770	-	2.70891e-07	6.92159e-05	-58.26
chr1	128934174	128934174	+	1.2333e-05	0.000885231	-60
chr1	129128388	129128388	+	3.17354e-07	7.69895e-05	51.6667
chr1	129644275	129644275	-	3.93969e-08	1.86806e-05	54.5918
chr1	130470878	130470878	-	9.90675e-09	7.33788e-06	71.4431
chr1	130493880	130493880	-	6.58692e-06	0.000585728	-50.8418
chr1	130699630	130699630	-	1.91827e-05	0.00118398	54.914
chr1	130725569	130725569	-	7.02217e-08	2.76512e-05	-69.5853
chr1	130764175	130764175	-	4.21898e-06	0.000434732	57.1429
chr1	130789855	130789855	-	1.43796e-05	0.000980351	-59.7222
chr1	130818779	130818779	-	4.5373e-08	2.05124e-05	-60.2151
chr1	130854737	130854737	+	1.257e-08	8.62014e-06	57.6923
chr1	130872491	130872491	-	4.09074e-10	7.88754e-07	58.4005
chr1	131050289	131050289	+	1.8906e-08	1.14082e-05	73.5294
chr1	131052361	131052361	+	4.45809e-07	9.68767e-05	55.7159
chr1	131088814	131088814	+	3.6552e-07	8.48763e-05	51.8617
chr1	131298458	131298458	+	8.83491e-07	0.000152832	-50.4813
chr1	131491823	131491823	+	9.05006e-08	3.30331e-05	-65.8847
chr1	131632784	131632784	+	2.4786e-06	0.000304947	-52.0455
chr1	131840216	131840216	+	8.7007e-08	3.21552e-05	-68.3007
chr1	131843355	131843355	+	1.71153e-07	5.07825e-05	-54.9075
chr1	131846570	131846570	+	1.17101e-06	0.000184408	-50.4386
chr1	131964151	131964151	+	2.8903e-07	7.2512e-05	-56.2834
chr1	131967725	131967725	-	2.02858e-09	2.43382e-06	52.9781
chr1	131978986	131978986	+	2.82669e-07	7.14495e-05	-56.5217
chr1	132013838	132013838	-	5.34662e-08	2.28774e-05	-61.1559
chr1	132022575	132022575	+	0.000530235	0.0102646	-50.6087
chr1	132045862	132045862	-	5.2463e-06	0.000502097	-52.7383
chr1	132109715	132109715	+	2.96377e-07	7.36707e-05	57.3643
chr1	132110134	132110134	+	9.41464e-11	2.77906e-07	64.6569
chr1	132184545	132184545	+	5.19081e-05	0.00227575	51.5556
chr1	132272552	132272552	+	1.89657e-06	0.000254919	63.555
chr1	132299582	132299582	+	2.8172e-05	0.00152104	-52.3915
chr1	132302530	132302530	+	5.12312e-08	2.22426e-05	58.6207
chr1	132309124	132309124	+	3.9165e-06	0.000413465	51.9814
chr1	132331506	132331506	+	7.78428e-09	6.17963e-06	65.625
chr1	132372954	132372954	+	5.9855e-07	0.000117998	-55.4878
chr1	132385533	132385533	-	2.24505e-06	0.000285756	55.4955
chr1	132413402	132413402	+	1.01006e-11	5.55777e-08	-58.1897
chr1	132421298	132421298	-	1.45523e-06	0.000213178	59.2593
chr1	132473318	132473318	+	1.31228e-08	8.86523e-06	-52.7629
chr1	132585156	132585156	+	1.95924e-07	5.57101e-05	54.2607
chr1	132593738	132593738	+	9.73913e-05	0.0034292	54.6296
chr1	132614188	132614188	-	3.78296e-06	0.000403929	-57.563
chr1	132626257	132626257	+	9.37843e-06	0.000738033	52.6316
chr1	132669732	132669732	+	3.6826e-08	1.78158e-05	75
chr1	132673640	132673640	+	5.70141e-06	0.000531273	53.4392
chr1	132802630	132802630	+	6.13805e-10	1.0497e-06	73.5484
chr1	132802635	132802635	+	1.41446e-06	0.000209129	50.1634
chr1	132868941	132868941	-	2.91981e-09	3.13332e-06	-54.5455
chr1	132878062	132878062	-	1.9739e-09	2.38972e-06	51.1628
chr1	132879484	132879484	-	2.36269e-12	1.84079e-08	-70.0946
chr1	132885073	132885073	-	7.77164e-08	2.96912e-05	60.7639
chr1	132947893	132947893	-	8.05143e-06	0.000667898	57.6803
chr1	133070327	133070327	+	0.000316793	0.00738597	51.1905
chr1	133191730	133191730	+	0.000139014	0.00432107	-52.0531
chr1	133210186	133210186	+	6.78519e-05	0.00271173	53.1746
chr1	133211018	133211018	+	1.32149e-06	0.000199949	-50.1732
chr1	133228177	133228177	-	5.91934e-06	0.000545465	60
chr1	133279158	133279158	+	3.28269e-06	0.000367551	-51.3783
chr1	133282540	133282540	-	1.41305e-07	4.457e-05	-56.8627
chr1	133287140	133287140	+	4.80151e-05	0.00215967	63.2609
chr1	133310699	133310699	+	2.12536e-09	2.5079e-06	71.875
chr1	133314446	133314446	-	2.02127e-05	0.00122543	-52.4242
chr1	133315864	133315864	-	4.61213e-07	9.9084e-05	66.0317
chr1	133352181	133352181	+	1.36009e-09	1.84217e-06	57.111
chr1	133373011	133373011	-	9.56194e-07	0.000161147	-55.24
chr1	133398735	133398735	-	9.58044e-12	5.35865e-08	-56.9841
chr1	133422237	133422237	-	0.000157268	0.00468514	-56.0386
chr1	133422644	133422644	-	1.65113e-06	0.000232364	55.4957
chr1	133730180	133730180	+	1.11295e-07	3.80164e-05	-57.1429
chr1	133767484	133767484	+	9.98573e-07	0.000165975	61.2396
chr1	133789095	133789095	-	1.79088e-06	0.000245054	62.3913
chr1	133881515	133881515	+	4.12396e-05	0.00195459	54.3561
chr1	133972591	133972591	-	7.15352e-07	0.000132409	-60.1852
chr1	134026215	134026215	+	1.93049e-07	5.51975e-05	55.3333
chr1	134026353	134026353	+	1.91554e-09	2.33477e-06	58.3333
chr1	134026867	134026867	+	5.1141e-06	0.000493966	65.7343
chr1	134043973	134043973	+	8.82777e-05	0.0032186	-57.7899
chr1	134074779	134074779	-	5.84553e-11	1.99471e-07	-57.2184
chr1	134076959	134076959	-	9.31777e-07	0.000158444	56.5517
chr1	134096127	134096127	-	0.000189973	0.00530336	-53.592
chr1	134096396	134096396	-	9.50562e-06	0.000744538	56
chr1	134177391	134177391	+	8.12398e-07	0.000144362	-61.9693
chr1	134196874	134196874	+	7.21542e-08	2.81627e-05	61.1111
chr1	134197746	134197746	-	1.42039e-06	0.000209797	59.375
chr1	134199529	134199529	-	3.16436e-07	7.68728e-05	-54.067
chr1	134245573	134245573	-	0.000170801	0.00494256	-50.9569
chr1	134273055	134273055	-	3.02528e-10	6.35057e-07	-57.1429
chr1	134298762	134298762	+	8.11517e-06	0.000671389	-51.7293
chr1	134314943	134314943	-	5.12708e-07	0.000106336	-54.023
chr1	134326529	134326529	-	1.32376e-07	4.26645e-05	57.672
chr1	134447391	134447391	+	6.69571e-10	1.12368e-06	-54.0541
chr1	134512581	134512581	+	1.57214e-06	0.000224961	62.4424
chr1	134663804	134663804	+	4.88339e-05	0.00218501	-57.5569
chr1	134665455	134665455	+	5.65626e-10	9.93769e-07	53.8756
chr1	134705287	134705287	-	0.00111395	0.0165265	50.2646
chr1	134747508	134747508	-	1.20283e-05	0.000870294	52.1643
chr1	134747578	134747578	-	2.15532e-11	9.71098e-08	80.5068
chr1	134755758	134755758	+	4.25236e-06	0.000436842	-51.5573
chr1	134803469	134803469	-	3.6634e-10	7.2804e-07	73.9683
chr1	134954361	134954361	+	1.35053e-06	0.000202934	-52.3077
chr1	134956852	134956852	+	6.63747e-09	5.52739e-06	-58.0645
chr1	135012001	135012001	+	2.72742e-06	0.000325446	-62.1483
chr1	135021850	135021850	+	9.48131e-07	0.000160395	50.9731
chr1	135039386	135039386	-	4.90216e-07	0.000102974	-72.1154
chr1	135046315	135046315	+	1.11936e-10	3.14848e-07	-53.4884
chr1	135061068	135061068	-	1.21738e-05	0.000877469	-52.1569
chr1	135141852	135141852	-	2.32062e-06	0.000292298	-51.2463
chr1	135187217	135187217	-	1.81995e-07	5.29814e-05	68.8095
chr1	135199193	135199193	-	1.77653e-05	0.0011261	53.8113
chr1	135199195	135199195	-	1.65196e-07	4.96067e-05	61.2732
chr1	135254002	135254002	+	6.77067e-09	5.60476e-06	56.3929
chr1	135267245	135267245	-	1.10299e-06	0.000177277	-61.4055
chr1	135282635	135282635	-	1.448e-06	0.000212439	-65.9091
chr1	135378632	135378632	+	1.09012e-07	3.74952e-05	-50.9263
chr1	135385309	135385309	+	2.77677e-11	1.1597e-07	-68.9234
chr1	135463835	135463835	+	1.5191e-08	9.81918e-06	69.8851
chr1	135481801	135481801	+	2.55226e-05	0.0014255	53.7895
chr1	135496808	135496808	-	0.000145792	0.00445906	-50.9317
chr1	135559100	135559100	+	0.000157272	0.00468517	51.2821
chr1	135559147	135559147	+	1.44815e-07	4.53584e-05	58.8589
chr1	135596318	135596318	+	2.39194e-06	0.00029791	60.8696
chr1	135646531	135646531	-	2.68588e-10	5.80928e-07	85
chr1	135783009	135783009	-	8.31682e-09	6.50271e-06	55.1463
chr1	135784836	135784836	-	3.31989e-05	0.00169664	53.7037
chr1	135798781	135798781	+	2.38544e-05	0.00136573	-53.2855
chr1	135808140	135808140	+	1.67308e-06	0.000234279	-53.5985
chr1	135814729	135814729	+	1.01139e-05	0.000775883	-51.64
chr1	135816613	135816613	+	1.07727e-06	0.000174426	50.3073
chr1	135847863	135847863	-	1.56909e-05	0.00103817	54.9107
chr1	135852058	135852058	-	1.06645e-05	0.000803638	50.2703
chr1	135866023	135866023	-	1.47181e-06	0.000214908	-70.3297
chr1	135920706	135920706	-	9.20721e-05	0.00330588	-51.1785
chr1	135946227	135946227	+	1.31056e-05	0.000921227	56.4073
chr1	135963371	135963371	-	1.6591e-09	2.10885e-06	-61.5385
chr1	135986557	135986557	-	6.85777e-09	5.65734e-06	61.1382
chr1	136049027	136049027	+	6.7233e-09	5.57671e-06	-50.3448
chr1	136052646	136052646	-	0.000390971	0.0084483	52.0737
chr1	136052783	136052783	+	6.6e-07	0.00012542	-54.7869
chr1	136060535	136060535	+	3.74368e-05	0.00183322	-57.1429
chr1	136222248	136222248	+	2.64198e-13	3.40055e-09	82.6087
chr1	136258904	136258904	-	1.08932e-05	0.000814722	50.5126
chr1	136298480	136298480	-	1.60254e-11	7.78623e-08	60.8974
chr1	136401442	136401442	+	4.36474e-07	9.55574e-05	-56.0664
chr1	136444043	136444043	-	2.588e-09	2.88923e-06	52.3014
chr1	136534420	136534420	-	4.95968e-09	4.53045e-06	67.8686
chr1	136563348	136563348	-	0.000529183	0.0102539	51.1905
chr1	136575570	136575570	-	3.10695e-06	0.000353996	-59.2437
chr1	136635791	136635791	+	1.40648e-06	0.000208437	53.978
chr1	136648507	136648507	-	1.73822e-09	2.17404e-06	51.2821
chr1	136680733	136680733	+	1.0691e-08	7.68401e-06	-58.8769
chr1	136777541	136777541	-	1.44557e-06	0.000212172	56.5934
chr1	136777563	136777563	-	6.02689e-07	0.000118546	57.8249
chr1	137129676	137129676	+	6.26182e-06	0.000566559	-51.5679
chr1	137172321	137172321	+	9.1983e-06	0.00072856	-59.5652
chr1	137227249	137227249	+	5.05921e-06	0.000490641	-50.723
chr1	137238787	137238787	+	9.20721e-05	0.00330588	-50.8929
chr1	137238806	137238806	+	5.26573e-05	0.00229709	-53.9352
chr1	137290776	137290776	-	2.06129e-10	4.81108e-07	-55.7598
chr1	137402789	137402789	+	3.53195e-05	0.00176666	54.3226
chr1	137541683	137541683	-	7.32247e-07	0.000134636	52.1487
chr1	137620941	137620941	+	1.13912e-11	6.08237e-08	71.2057
chr1	137945928	137945928	+	1.05826e-09	1.55022e-06	-61.1885
chr1	138281429	138281429	+	1.41136e-05	0.000967776	54.4592
chr1	138326012	138326012	+	1.22509e-06	0.000190349	52.0147
chr1	138348760	138348760	-	2.16126e-05	0.00127993	-52.5901
chr1	138386069	138386069	+	0.000170342	0.0049346	50.7389
chr1	138386100	138386100	+	2.0016e-07	5.64298e-05	68.4729
chr1	138424318	138424318	+	1.26434e-05	0.000899909	-55.6452
chr1	138507230	138507230	+	6.77107e-05	0.00270786	56.9444
chr1	138524268	138524268	-	1.09682e-12	1.06818e-08	58.0882
chr1	138550809	138550809	-	1.56018e-07	4.77099e-05	56.6667
chr1	138775475	138775475	-	2.06497e-06	0.000270099	-58.2353
chr1	138776878	138776878	+	0.000148658	0.00451518	-52.7273
chr1	138783668	138783668	+	3.6672e-07	8.50518e-05	59.4048
chr1	138840619	138840619	-	3.02762e-05	0.00159642	58.3333
chr1	138846423	138846423	-	3.57712e-08	1.74693e-05	65.042
chr1	138919768	138919768	-	3.21692e-09	3.35007e-06	72.2222
chr1	138959238	138959238	+	9.92249e-07	0.000165235	-52.5253
chr1	139163669	139163669	+	1.62445e-05	0.00106135	-52.4444
chr1	139204142	139204142	+	0.000125827	0.00405213	53.1469
chr1	139287876	139287876	-	1.04778e-07	3.65214e-05	57.9027
chr1	139308917	139308917	-	2.17229e-07	5.96973e-05	-67.1171
chr1	140484000	140484000	-	2.35565e-05	0.00135378	57.4271
chr1	141019338	141019338	-	1.75717e-05	0.00111813	-61.1285
chr1	141019346	141019346	-	5.92539e-05	0.00247856	-57.6803
chr1	141019383	141019383	-	0.000234258	0.006062	-51.8809
chr1	141019391	141019391	-	2.16579e-07	5.95831e-05	-52.5806
chr1	141019394	141019394	-	1.72956e-12	1.4529e-08	-65.5812
chr1	141300926	141300926	-	4.38041e-05	0.00203315	59
chr1	141657236	141657236	+	5.39763e-06	0.000511861	-57.4213
chr1	141684117	141684117	+	8.13258e-06	0.000671916	-58.3333
chr1	141774291	141774291	+	1.22045e-09	1.70985e-06	-52.9412
chr1	142508045	142508045	+	1.00642e-09	1.49363e-06	69.697
chr1	142608232	142608232	-	4.52326e-09	4.25341e-06	-57.8223
chr1	143094509	143094509	+	2.6696e-06	0.000320824	-62.8993
chr1	143122089	143122089	+	6.89787e-07	0.000129269	51.8519
chr1	143142181	143142181	-	8.01593e-08	3.03331e-05	-62.0276
chr1	143280518	143280518	-	6.9187e-07	0.00012945	54.065
chr1	143491236	143491236	+	3.54163e-08	1.73656e-05	-65.7524
chr1	143741191	143741191	+	1.2917e-06	0.000196686	-70
chr1	143840299	143840299	-	1.4914e-06	0.000216927	-62.069
chr1	143983526	143983526	+	3.54688e-06	0.000387116	65.2778
chr1	143986799	143986799	-	4.61891e-08	2.07428e-05	-64.4444
chr1	144137459	144137459	+	6.90042e-06	0.000603666	-54.902
chr1	144224750	144224750	-	5.6245e-07	0.000113208	-51.4286
chr1	144558120	144558120	-	5.6768e-06	0.000529694	53.7778
chr1	144590044	144590044	+	1.68889e-09	2.13318e-06	-69.2308
chr1	144665753	144665753	+	1.5507e-08	9.9467e-06	-59.6285
chr1	145310569	145310569	-	8.04951e-07	0.000143514	-53.1868
chr1	145517305	145517305	-	3.34327e-05	0.00170416	-57.0513
chr1	145723096	145723096	-	1.54478e-05	0.0010278	51.371
chr1	145886284	145886284	-	8.37519e-10	1.31575e-06	-59.0381
chr1	146458244	146458244	+	1.20058e-09	1.69823e-06	-57.3099
chr1	146777267	146777267	+	1.02673e-08	7.49147e-06	60.8362
chr1	147182897	147182897	-	1.24765e-06	0.000192556	-52.9483
chr1	147313615	147313615	+	5.08897e-08	2.21358e-05	-52.3088
chr1	148601245	148601245	-	9.5209e-07	0.00016067	-67.5824
chr1	148977830	148977830	+	8.19309e-06	0.000674741	56.25
chr1	149198922	149198922	-	7.34139e-05	0.00285594	-52.0704
chr1	149336048	149336048	+	2.85249e-05	0.00153398	-50.8333
chr1	149438888	149438888	+	1.46933e-05	0.000994605	50.7021
chr1	149595011	149595011	-	2.37608e-06	0.000296725	-57.8495
chr1	149737867	149737867	-	3.60862e-09	3.61269e-06	-60.0909
chr1	149786992	149786992	-	0.000310284	0.00728306	-50.5714
chr1	149795993	149795993	-	3.21264e-12	2.33364e-08	-68.6717
chr1	149803836	149803836	-	7.18713e-06	0.000619224	-54.2857
chr1	149960959	149960959	-	1.20777e-06	0.000188242	-52.1739
chr1	150247509	150247509	+	0.000150207	0.00454463	-51.737
chr1	150847372	150847372	+	1.35418e-06	0.000203317	-52.9487
chr1	150848759	150848759	-	8.52648e-06	0.000693286	53.8194
chr1	150897971	150897971	-	2.74416e-07	6.98892e-05	-56.25
chr1	150944859	150944859	+	1.17179e-08	8.18498e-06	67.8788
chr1	150951125	150951125	+	4.37687e-10	8.27609e-07	53.0749
chr1	151036885	151036885	+	4.54178e-07	9.80371e-05	63.6471
chr1	151232435	151232435	-	1.57746e-07	4.80879e-05	53.8904
chr1	151369562	151369562	-	1.2253e-07	4.06092e-05	-54.7348
chr1	151592371	151592371	-	1.823e-09	2.25605e-06	64.1026
chr1	151632390	151632390	-	6.44374e-08	2.6068e-05	56.9231
chr1	151789391	151789391	+	5.62249e-06	0.000526281	-51.0417
chr1	151937546	151937546	-	1.25812e-06	0.000193597	-58.0488
chr1	152290116	152290116	-	1.00737e-08	7.4116e-06	64
chr1	152354355	152354355	+	1.29308e-07	4.19862e-05	-52.8361
chr1	152440053	152440053	-	4.03926e-08	1.89941e-05	60.2703
chr1	152440085	152440085	-	7.59833e-10	1.22698e-06	71.875
chr1	152440091	152440091	-	0.000325523	0.00750468	50.1437
chr1	152499406	152499406	+	2.38864e-05	0.00136664	-55.2036
chr1	152537220	152537220	+	1.88569e-05	0.00117033	50.6803
chr1	152546354	152546354	+	1.18415e-05	0.000860942	-51.1538
chr1	152556918	152556918	+	3.17521e-08	1.6183e-05	51.9309
chr1	152577070	152577070	+	4.21453e-05	0.00198332	-51.8817
chr1	152577376	152577376	+	1.00883e-07	3.55751e-05	-55.192
chr1	152588584	152588584	-	3.97014e-06	0.000417286	52.0444
chr1	152594457	152594457	-	0.000171767	0.00495822	-50.3712
chr1	152610396	152610396	+	6.93247e-06	0.000605508	-55.0505
chr1	152650319	152650319	+	3.68897e-08	1.78349e-05	-62.4801
chr1	152650340	152650340	+	9.27417e-06	0.000732566	-52.2624
chr1	152650373	152650373	+	3.18686e-08	1.6214e-05	-60.33
chr1	152966304	152966304	+	0.00044089	0.00913194	-50.6667
chr1	153035218	153035218	-	3.10632e-05	0.00162326	-58.3333
chr1	153072022	153072022	-	3.12662e-08	1.60261e-05	-55.9441
chr1	153073573	153073573	-	2.77835e-10	5.95546e-07	57.4747
chr1	153081609	153081609	-	0.000195954	0.00540661	-54.329
chr1	153096439	153096439	+	3.22295e-06	0.000363246	-53.9672
chr1	153115590	153115590	-	0.000186073	0.0052328	-50.2315
chr1	153235847	153235847	+	3.25508e-05	0.00167409	50.8462
chr1	153303135	153303135	-	2.37809e-05	0.001363	55.7692
chr1	153378787	153378787	-	4.28492e-06	0.000439244	-64.6154
chr1	153603469	153603469	+	4.10796e-06	0.000426837	63.0499
chr1	153702075	153702075	+	5.60554e-10	9.87407e-07	-79.329
chr1	153742778	153742778	+	5.08422e-07	0.000105669	-55.5024
chr1	153750324	153750324	-	7.51916e-10	1.21773e-06	57.7796
chr1	153807837	153807837	+	3.07962e-05	0.00161356	50.8696
chr1	153911256	153911256	-	1.16357e-06	0.000183642	-53.531
chr1	154053893	154053893	+	1.70337e-05	0.00109496	-51.8519
chr1	154053917	154053917	+	5.78727e-06	0.000537023	-55.6878
chr1	154102448	154102448	+	2.08335e-08	1.21564e-05	-54.386
chr1	154103385	154103385	-	9.95042e-10	1.48328e-06	58.9827
chr1	154298728	154298728	+	1.47435e-05	0.000996408	51.0714
chr1	154659916	154659916	+	1.33013e-12	1.20477e-08	-67.5381
chr1	154659919	154659919	+	1.43557e-08	9.41075e-06	-51.4161
chr1	154705264	154705264	-	1.19025e-05	0.000864049	51.9481
chr1	154733563	154733563	-	1.10757e-10	3.12931e-07	-56.9524
chr1	154820630	154820630	+	3.95075e-08	1.87101e-05	65.4605
chr1	154889667	154889667	-	2.27759e-05	0.00132312	-52.5641
chr1	154916711	154916711	+	9.89225e-09	7.33084e-06	75.3788
chr1	154921215	154921215	+	5.98708e-05	0.00249459	-51.3187
chr1	155091724	155091724	+	1.71904e-06	0.000238726	58.5648
chr1	155094235	155094235	+	5.27914e-06	0.000504254	-62.2069
chr1	155135187	155135187	-	9.88338e-09	7.33042e-06	-52.987
chr1	155135404	155135404	-	4.2843e-08	1.96943e-05	-58.1841
chr1	155169557	155169557	+	1.22434e-10	3.33714e-07	69.8413
chr1	155205688	155205688	+	2.6942e-09	2.97352e-06	68.659
chr1	155206759	155206759	-	2.86328e-06	0.000336017	51.7626
chr1	155213508	155213508	-	7.9674e-08	3.02059e-05	-58.0645
chr1	155216640	155216640	-	7.83547e-06	0.000655182	57.5893
chr1	155218083	155218083	+	5.46916e-06	0.00051652	58.0513
chr1	155228765	155228765	+	8.34922e-06	0.000683686	-61.2853
chr1	155294261	155294261	+	8.86639e-06	0.000711524	68.1818
chr1	155307720	155307720	+	9.09887e-08	3.317e-05	50.876
chr1	155681013	155681013	-	3.88079e-06	0.00041084	60.1538
chr1	155769737	155769737	-	9.50249e-07	0.000160525	-53.852
chr1	155790852	155790852	+	8.09488e-07	0.000143967	52.5794
chr1	155829041	155829041	-	2.06344e-05	0.00124199	-54.5455
chr1	156015709	156015709	-	1.04451e-08	7.57603e-06	58.9744
chr1	156062093	156062093	+	1.56653e-07	4.78773e-05	-64.8148
chr1	156221541	156221541	-	4.35781e-08	1.99179e-05	57.1429
chr1	156391222	156391222	-	4.05083e-06	0.000423055	-50.0947
chr1	156452829	156452829	+	5.57092e-06	0.000522921	-55.1198
chr1	156569943	156569943	-	2.53328e-06	0.000309357	59.4286
chr1	156630063	156630063	-	1.78961e-10	4.3863e-07	75
chr1	156780792	156780792	+	2.17356e-05	0.00128476	-55.4113
chr1	156852733	156852733	-	1.9112e-09	2.33306e-06	71.7254
chr1	156940689	156940689	+	3.81938e-06	0.000406743	-51.0684
chr1	156997483	156997483	+	4.60854e-06	0.000460765	-55.5556
chr1	157015329	157015329	-	6.86732e-08	2.72314e-05	-64
chr1	157038603	157038603	-	2.58507e-06	0.000313697	-57.5682
chr1	157073218	157073218	-	1.80302e-08	1.10372e-05	65.3901
chr1	157083554	157083554	+	7.35428e-06	0.000627789	-53.405
chr1	157378564	157378564	-	0.000155473	0.00464943	-51.7903
chr1	157413091	157413091	-	4.62077e-08	2.07428e-05	51.3514
chr1	157413103	157413103	-	2.99725e-08	1.55891e-05	52.7778
chr1	157420055	157420055	+	4.42398e-10	8.32758e-07	-58.4152
chr1	157436537	157436537	-	1.71641e-08	1.06525e-05	-70
chr1	157471428	157471428	-	3.22844e-07	7.8012e-05	-51.7677
chr1	157513868	157513868	+	5.19733e-07	0.000107269	53.2051
chr1	157561253	157561253	+	6.20821e-06	0.000563003	52.807
chr1	157710015	157710015	+	1.81948e-05	0.001144	53.0488
chr1	157713990	157713990	+	1.73896e-09	2.17404e-06	-71.6626
chr1	157722388	157722388	+	5.7073e-06	0.000531652	-52.8736
chr1	157726372	157726372	-	5.17883e-06	0.000498174	62.1578
chr1	157738072	157738072	-	8.55902e-11	2.58471e-07	-73.2331
chr1	158012319	158012319	+	0.000128888	0.00411721	52.5466
chr1	158227698	158227698	+	1.38993e-05	0.000958175	52.44
chr1	158238995	158238995	-	0.000225382	0.0059201	-52.3148
chr1	158348333	158348333	+	3.78924e-07	8.69638e-05	54.7847
chr1	158404899	158404899	-	2.68325e-08	1.44096e-05	-68.75
chr1	158531566	158531566	-	1.83853e-10	4.45901e-07	-59.6667
chr1	158548423	158548423	-	3.66369e-12	2.58038e-08	54.8804
chr1	158641605	158641605	+	7.07897e-07	0.000131427	57.8947
chr1	158657181	158657181	-	4.30578e-09	4.10345e-06	78.592
chr1	158850652	158850652	-	1.88978e-05	0.00117179	-51.2821
chr1	158854642	158854642	-	1.80209e-07	5.26078e-05	-62.5885
chr1	159138001	159138001	-	3.87007e-09	3.80264e-06	54.3269
chr1	159494327	159494327	-	3.31978e-07	7.94557e-05	54.9872
chr1	159576370	159576370	-	1.39019e-09	1.86799e-06	-64
chr1	159598865	159598865	-	1.05461e-11	5.74548e-08	62.1281
chr1	159693313	159693313	+	2.61105e-07	6.75028e-05	-60.0281
chr1	159693351	159693351	+	2.86076e-06	0.000335821	-50.2815
chr1	159768842	159768842	-	1.61998e-12	1.38199e-08	83.871
chr1	159799877	159799877	-	1.37553e-07	4.36997e-05	-51.7241
chr1	159879775	159879775	-	1.07776e-05	0.000809176	-56.2378
chr1	159893833	159893833	+	8.31327e-07	0.000146689	-52.8571
chr1	159967392	159967392	+	8.47331e-05	0.00313121	-51.8519
chr1	160023248	160023248	+	1.66516e-05	0.00107922	-64.3892
chr1	160040278	160040278	+	2.99067e-10	6.29405e-07	-52.7778
chr1	160042081	160042081	-	7.02016e-06	0.000610656	-50.2189
chr1	160043295	160043295	-	9.54644e-06	0.000746385	55.5944
chr1	160290517	160290517	-	2.35897e-09	2.69436e-06	61.5385
chr1	160290528	160290528	-	1.73079e-07	5.11471e-05	60.4651
chr1	160307417	160307417	+	5.5482e-07	0.000112177	-50.0741
chr1	160566632	160566632	-	1.15903e-09	1.6555e-06	-70
chr1	161112977	161112977	+	9.12182e-06	0.000724902	-53.223
chr1	161247596	161247596	-	1.11007e-07	3.79386e-05	59.6277
chr1	161443447	161443447	+	4.71148e-09	4.37182e-06	60.8537
chr1	161672262	161672262	+	2.75161e-06	0.000327231	-52
chr1	161804724	161804724	-	6.79345e-07	0.000127922	-55.8824
chr1	161988388	161988388	-	2.97871e-06	0.000344738	-52.6144
chr1	161990766	161990766	+	1.10107e-07	3.77347e-05	-56.4871
chr1	162037357	162037357	+	3.06817e-11	1.24824e-07	60.3836
chr1	162101509	162101509	-	1.53608e-08	9.88889e-06	-69.1327
chr1	162142401	162142401	-	2.48364e-05	0.00140106	-51.5957
chr1	162162395	162162395	+	1.2101e-10	3.31889e-07	-75.3488
chr1	162312451	162312451	-	2.12621e-11	9.61918e-08	64.5427
chr1	162313598	162313598	+	1.118e-05	0.000828222	-53.2959
chr1	162439035	162439035	-	4.89645e-05	0.00218886	-54.7192
chr1	162478340	162478340	-	6.14704e-08	2.52106e-05	56.4103
chr1	162651161	162651161	-	4.29016e-08	1.96986e-05	-67.2515
chr1	162737871	162737871	+	4.4715e-09	4.2257e-06	63.5417
chr1	162863037	162863037	+	5.6128e-06	0.000525664	-51.4474
chr1	162948306	162948306	-	5.80293e-10	1.01085e-06	-56.3396
chr1	163045620	163045620	+	0.000132682	0.00419111	53.8095
chr1	163219184	163219184	+	6.77107e-05	0.00270786	56.9444
chr1	163438846	163438846	+	1.45948e-05	0.00099027	62.8571
chr1	163724989	163724989	-	2.32273e-05	0.00134154	50.2547
chr1	163724998	163724998	+	4.38004e-07	9.5743e-05	-67.8571
chr1	163942188	163942188	+	1.91168e-05	0.00118102	53.5714
chr1	164040538	164040538	+	2.01789e-06	0.000266003	55.5237
chr1	164079127	164079127	+	7.33057e-07	0.00013474	-58.4848
chr1	164144623	164144623	-	2.12842e-06	0.000275618	-50.5556
chr1	164173309	164173309	-	3.34055e-08	1.67025e-05	55.8824
chr1	164317507	164317507	-	3.08735e-08	1.58952e-05	-60.5114
chr1	164317529	164317529	-	3.17125e-08	1.61758e-05	-59.6657
chr1	164348594	164348594	-	4.18003e-05	0.00197172	-56.3859
chr1	164368409	164368409	-	1.33187e-06	0.000201106	-63.1336
chr1	164481415	164481415	+	5.59513e-07	0.000112817	-50.4909
chr1	164482304	164482304	+	8.20262e-07	0.00014539	53.125
chr1	164538983	164538983	-	8.78769e-08	3.23618e-05	-54.4444
chr1	164637163	164637163	-	3.98344e-05	0.0019098	-52.5202
chr1	164755465	164755465	+	1.10856e-08	7.86311e-06	64.6478
chr1	164794362	164794362	+	3.03666e-10	6.36534e-07	-53.9171
chr1	164926602	164926602	-	3.40241e-05	0.00172392	-54.3333
chr1	165143570	165143570	-	1.39231e-05	0.000959134	-50.6203
chr1	165151537	165151537	-	2.06284e-07	5.75676e-05	-52.4578
chr1	165210885	165210885	-	2.32117e-06	0.000292326	53.2222
chr1	165283363	165283363	-	3.39737e-06	0.000376008	52.1164
chr1	165303415	165303415	+	9.72865e-10	1.46061e-06	-68.4766
chr1	165314789	165314789	-	1.0919e-05	0.000815796	53.8462
chr1	165546780	165546780	+	1.92019e-06	0.000257168	51.4286
chr1	165559116	165559116	-	1.10517e-06	0.000177568	-54.0793
chr1	165585747	165585747	-	1.78226e-05	0.00112846	51.9841
chr1	165616244	165616244	+	9.53539e-07	0.00016081	56.1635
chr1	165616256	165616256	+	7.71156e-06	0.000648925	54.3011
chr1	165625634	165625634	+	2.03647e-07	5.70547e-05	59.0934
chr1	165653826	165653826	+	1.44137e-11	7.17744e-08	62.4902
chr1	165705556	165705556	+	3.40623e-08	1.69348e-05	-57.4468
chr1	165722546	165722546	-	6.573e-07	0.000125093	-60.7742
chr1	165726856	165726856	+	6.79298e-08	2.70463e-05	61.6688
chr1	165812404	165812404	-	1.54621e-08	9.9377e-06	56.8533
chr1	165865660	165865660	+	1.34491e-06	0.000202401	62.9474
chr1	165999577	165999577	-	3.05675e-06	0.000350285	56.5476
chr1	166051906	166051906	+	1.19353e-05	0.00086596	-51.4308
chr1	166100542	166100542	-	5.98168e-07	0.000117957	55.6985
chr1	166105479	166105479	+	1.54067e-07	4.73199e-05	67.0588
chr1	166140154	166140154	-	9.73447e-08	3.46969e-05	58.1378
chr1	166192433	166192433	+	9.30605e-07	0.000158336	-60.4348
chr1	166209550	166209550	-	9.48926e-06	0.000743856	55.9615
chr1	166241848	166241848	-	5.01833e-09	4.56616e-06	52.5046
chr1	166599148	166599148	-	7.47405e-09	6.00562e-06	64
chr1	166641387	166641387	-	4.69011e-07	0.000100197	54.6445
chr1	166692592	166692592	+	1.66684e-06	0.000233738	58.3669
chr1	166700730	166700730	-	1.72891e-06	0.00023965	51.1651
chr1	166707156	166707156	-	1.06556e-06	0.000173256	-62.0935
chr1	166729858	166729858	+	3.28846e-05	0.00168589	-52
chr1	166793334	166793334	-	1.88159e-05	0.0011684	-50.9662
chr1	166794988	166794988	+	9.15433e-06	0.000726526	60.6667
chr1	166866269	166866269	+	1.71272e-08	1.06415e-05	-68.7069
chr1	167063867	167063867	+	1.4093e-06	0.000208696	-55
chr1	167070069	167070069	+	2.73591e-08	1.46322e-05	-56.25
chr1	167073816	167073816	-	4.22987e-08	1.95647e-05	-63.9683
chr1	167110880	167110880	-	5.79017e-06	0.000537136	-55.8036
chr1	167191766	167191766	-	6.79816e-10	1.13784e-06	82.0402
chr1	167251772	167251772	-	1.43189e-06	0.00021087	-59.5905
chr1	167252026	167252026	+	7.25478e-09	5.89356e-06	-57.1429
chr1	167338471	167338471	+	1.88223e-05	0.00116872	55.5556
chr1	167409776	167409776	+	1.5203e-08	9.81974e-06	59.9894
chr1	167565785	167565785	+	1.79151e-05	0.00113304	50.4167
chr1	167595599	167595599	+	1.11728e-10	3.14463e-07	55.102
chr1	167645648	167645648	+	2.01848e-05	0.0012242	-58.9286
chr1	167656085	167656085	-	5.8428e-07	0.000116158	-55.5556
chr1	167687855	167687855	+	2.02438e-07	5.68544e-05	50.8523
chr1	167687951	167687951	+	0.000118502	0.0038977	56.734
chr1	167696327	167696327	+	4.94976e-06	0.000483178	-63.4259
chr1	167772490	167772490	-	1.2038e-08	8.35841e-06	-58.8235
chr1	167779487	167779487	-	3.01265e-11	1.23134e-07	-55.2381
chr1	167822890	167822890	+	1.71887e-06	0.000238724	60.7069
chr1	167905029	167905029	-	0.000531208	0.0102742	50.9524
chr1	167946098	167946098	+	3.26167e-06	0.000366278	-50.4638
chr1	168116813	168116813	+	2.67644e-05	0.00147115	-50.9244
chr1	168164717	168164717	-	2.145e-07	5.9195e-05	-64.4211
chr1	168245673	168245673	-	6.94908e-05	0.00275286	53.9402
chr1	168265983	168265983	-	1.74656e-06	0.000241291	52.3333
chr1	168319216	168319216	+	1.67308e-05	0.00108256	56.0606
chr1	168319249	168319249	+	1.84523e-05	0.00115306	51.5152
chr1	169459185	169459185	+	4.2929e-05	0.00200679	-52.2031
chr1	169598571	169598571	-	1.86211e-08	1.12905e-05	-64
chr1	169636997	169636997	+	1.55321e-08	9.95071e-06	-73.913
chr1	169927845	169927845	+	5.92539e-05	0.00247856	-57.6803
chr1	169930099	169930099	+	1.01436e-06	0.000167724	60.8124
chr1	169968379	169968379	+	4.57255e-08	2.05999e-05	-66.6667
chr1	170110194	170110194	-	2.23022e-06	0.000284477	57.5269
chr1	170110410	170110410	-	2.93165e-11	1.20382e-07	72.1212
chr1	170113945	170113945	+	7.59575e-07	0.000137909	-55.9524
chr1	170139515	170139515	-	1.90888e-06	0.000256041	-54.7826
chr1	170975894	170975894	-	1.91782e-12	1.58986e-08	-77.7289
chr1	170975940	170975940	-	1.79618e-07	5.24769e-05	-57.3718
chr1	171029850	171029850	+	1.72555e-05	0.0011042	53.9815
chr1	171119642	171119642	-	0.000342809	0.00776322	-50.1359
chr1	171158602	171158602	+	7.24691e-06	0.000622766	-60.6138
chr1	171161892	171161892	+	4.31765e-07	9.49403e-05	-52.6778
chr1	171204488	171204488	+	6.61447e-05	0.00266616	-51.0369
chr1	171370450	171370450	+	3.41745e-05	0.00172825	53.3469
chr1	171376269	171376269	+	5.95628e-08	2.46784e-05	52.3229
chr1	172020311	172020311	-	1.90576e-05	0.00117855	-51.2311
chr1	172021704	172021704	-	2.99945e-05	0.00158594	51.4176
chr1	172086439	172086439	+	3.46288e-12	2.47861e-08	64.2857
chr1	172127529	172127529	-	2.80993e-06	0.000331779	-54.5113
chr1	172227000	172227000	+	8.68742e-07	0.000151254	-52.8718
chr1	172264487	172264487	-	2.20577e-09	2.57552e-06	57.1429
chr1	172286949	172286949	+	1.46368e-11	7.26492e-08	66.3808
chr1	172293009	172293009	+	1.27996e-05	0.00090712	-52.3556
chr1	172309127	172309127	-	2.26396e-08	1.28525e-05	-65.3363
chr1	172318089	172318089	+	7.64368e-06	0.000644963	-50.4274
chr1	172318261	172318261	+	0.000139092	0.004323	-50.6586
chr1	172325925	172325925	-	1.94404e-06	0.000259187	-53.3333
chr1	172377517	172377517	-	2.70188e-07	6.91365e-05	70.6147
chr1	172380197	172380197	-	2.37127e-07	6.33734e-05	59.5238
chr1	172380223	172380223	-	2.80875e-09	3.05585e-06	74.6032
chr1	172528717	172528717	-	6.73039e-06	0.000593855	-57.5758
chr1	172614171	172614171	-	7.99592e-09	6.30556e-06	-54.2857
chr1	173317280	173317280	-	7.29409e-07	0.00013429	60
chr1	173450175	173450175	-	2.9692e-08	1.5476e-05	50.8475
chr1	173692248	173692248	+	6.31112e-06	0.000569436	52.6455
chr1	173940863	173940863	-	1.37346e-06	0.000205252	-56
chr1	174084594	174084594	+	8.03615e-08	3.03866e-05	-70
chr1	174120280	174120280	+	4.15152e-08	1.93221e-05	-54.2801
chr1	174207002	174207002	+	7.09261e-08	2.78438e-05	52.9412
chr1	174269919	174269919	+	4.60942e-06	0.00046079	-57.2008
chr1	174430491	174430491	-	2.12951e-07	5.89077e-05	-60.6061
chr1	174491654	174491654	+	1.28646e-05	0.000910291	-55.8442
chr1	174509870	174509870	-	7.50015e-06	0.000636636	-51.4957
chr1	174738974	174738974	+	3.09156e-06	0.0003528	53.9898
chr1	175034118	175034118	-	1.67308e-05	0.00108256	57.0028
chr1	175319579	175319579	+	1.72434e-08	1.06848e-05	-61.0753
chr1	175487701	175487701	+	1.44757e-10	3.78616e-07	-65.982
chr1	175670206	175670206	-	1.97551e-08	1.17515e-05	-61.5595
chr1	175695666	175695666	+	4.527e-06	0.000455145	-53.125
chr1	175897843	175897843	+	0.000331219	0.0075904	-52
chr1	176009810	176009810	-	1.01421e-06	0.000167724	-65.7609
chr1	176321342	176321342	+	3.86353e-05	0.00187298	57.0881
chr1	176423370	176423370	+	3.70037e-07	8.55642e-05	-62.5227
chr1	176467132	176467132	-	4.71553e-07	0.000100589	-65.9938
chr1	176505610	176505610	-	1.01084e-06	0.000167365	-51.7677
chr1	176529823	176529823	+	4.48649e-05	0.00206621	51.9231
chr1	176794424	176794424	-	6.66723e-08	2.66808e-05	70.6349
chr1	176835730	176835730	-	2.53299e-05	0.00141919	-55.0416
chr1	176863551	176863551	-	4.39036e-06	0.000446211	56.8878
chr1	176965102	176965102	+	2.64999e-10	5.74919e-07	76.8872
chr1	176979917	176979917	-	9.63461e-12	5.38212e-08	63.8756
chr1	177000930	177000930	-	1.87e-05	0.00116396	57.0234
chr1	177369454	177369454	-	3.40987e-06	0.000377004	-57.0789
chr1	177451160	177451160	-	1.22248e-07	4.05616e-05	50.4851
chr1	177559140	177559140	-	4.16772e-07	9.26617e-05	64.1892
chr1	177597286	177597286	-	1.27821e-07	4.16878e-05	-61.6366
chr1	177620651	177620651	-	0.000162699	0.00479331	-51.3986
chr1	177623583	177623583	-	1.26536e-07	4.14284e-05	-54.9138
chr1	177727403	177727403	-	0.000103321	0.00356291	-51.5915
chr1	177837107	177837107	-	3.34327e-05	0.00170416	-57.0513
chr1	177990502	177990502	-	2.88965e-12	2.14504e-08	62.8205
chr1	178014972	178014972	-	3.13826e-06	0.000356209	-56.3131
chr1	178194644	178194644	+	5.47967e-06	0.000517179	-51.1321
chr1	178390070	178390070	-	1.1223e-05	0.000830665	52.1053
chr1	178488081	178488081	-	9.86864e-08	3.50474e-05	-53.8462
chr1	178546911	178546911	-	2.35239e-08	1.31651e-05	64.4118
chr1	178584670	178584670	-	1.69732e-05	0.00109295	53.5679
chr1	178609438	178609438	+	4.47812e-06	0.000452245	-64.0693
chr1	178610348	178610348	+	1.72831e-05	0.0011054	51.1877
chr1	178685320	178685320	-	3.38013e-08	1.68392e-05	-72.3325
chr1	178748604	178748604	-	9.54613e-06	0.000746385	57.1429
chr1	178800211	178800211	-	1.55276e-10	3.97855e-07	84.8889
chr1	178819972	178819972	+	2.16702e-07	5.96046e-05	52.7273
chr1	178835895	178835895	-	7.40071e-07	0.000135644	52.6316
chr1	178886182	178886182	-	3.9111e-05	0.00188847	51.1312
chr1	178973192	178973192	+	5.09576e-05	0.00224607	-50.9268
chr1	178979145	178979145	-	9.78332e-07	0.000163603	56.6563
chr1	178995988	178995988	+	5.24682e-11	1.84475e-07	57.582
chr1	179042022	179042022	-	1.24045e-07	4.08833e-05	-59.4595
chr1	179042048	179042048	-	3.51669e-10	7.0978e-07	-78.5714
chr1	179042054	179042054	-	8.70775e-06	0.000703	-53.5682
chr1	179042063	179042063	-	2.44282e-09	2.76218e-06	-77.4155
chr1	179042077	179042077	-	5.92539e-05	0.00247856	-58.4708
chr1	179050299	179050299	-	1.08703e-07	3.74359e-05	-60.7143
chr1	179050355	179050355	-	3.44009e-07	8.15022e-05	55.1471
chr1	179060681	179060681	+	1.95474e-07	5.56363e-05	-53.7526
chr1	179111639	179111639	+	1.27177e-05	0.000903338	-62.9565
chr1	179191901	179191901	-	1.45828e-12	1.28901e-08	-51.6057
chr1	179338468	179338468	+	1.12798e-06	0.00018019	63.2275
chr1	179929036	179929036	+	6.07994e-07	0.00011914	-56.9697
chr1	179931674	179931674	-	4.14333e-06	0.000429499	-61.4144
chr1	180135960	180135960	+	3.98432e-06	0.000418267	-52.5564
chr1	180280091	180280091	-	2.4527e-07	6.48372e-05	50.3125
chr1	180296501	180296501	+	9.96096e-07	0.000165719	55.7509
chr1	180347864	180347864	+	7.68234e-06	0.000647233	-55
chr1	180368775	180368775	-	1.24008e-05	0.000888142	55.8889
chr1	180403800	180403800	+	4.77967e-08	2.11796e-05	52.5108
chr1	180425629	180425629	+	2.42142e-06	0.000300269	-52.1739
chr1	180429150	180429150	+	3.1912e-10	6.5858e-07	-61.9375
chr1	180480483	180480483	+	8.26388e-07	0.000146152	-56.7568
chr1	180482017	180482017	+	0.000353328	0.00791836	53.4965
chr1	180508553	180508553	-	1.70448e-05	0.00109551	59.0476
chr1	180510825	180510825	-	1.09486e-07	3.7588e-05	63.6842
chr1	180583759	180583759	-	1.06223e-05	0.000801918	54.8387
chr1	180735782	180735782	+	5.31e-05	0.00230929	-52
chr1	180888604	180888604	+	1.13967e-06	0.000181412	72.7273
chr1	180892739	180892739	-	6.68296e-05	0.00268523	-51.3357
chr1	180893253	180893253	-	7.73039e-05	0.00295117	52.1429
chr1	180903466	180903466	+	4.57255e-08	2.05999e-05	-68.2331
chr1	180933684	180933684	-	6.63433e-07	0.000125879	-70
chr1	180935274	180935274	-	0.000115313	0.00382985	50.7937
chr1	181018587	181018587	-	1.06942e-07	3.70496e-05	-65.4949
chr1	181104622	181104622	+	1.44661e-07	4.53394e-05	66.4368
chr1	181274925	181274925	-	1.62769e-08	1.02783e-05	53.6807
chr1	181299817	181299817	-	4.49597e-08	2.03855e-05	-59.3338
chr1	181325363	181325363	-	5.14656e-05	0.00226196	-50.7922
chr1	181325423	181325423	-	6.05354e-07	0.000118781	-56.5217
chr1	181325447	181325447	-	5.88627e-09	5.09375e-06	-69.5652
chr1	181347998	181347998	-	2.49837e-06	0.000306312	-52.3297
chr1	181375438	181375438	+	2.42798e-07	6.43731e-05	54.2857
chr1	181403162	181403162	-	3.10989e-07	7.60449e-05	-52.6316
chr1	181422828	181422828	-	9.14895e-08	3.33002e-05	52.2727
chr1	181440077	181440077	+	3.12697e-08	1.60261e-05	59.305
chr1	181554887	181554887	-	7.12547e-06	0.000616021	-53.6298
chr1	181585765	181585765	-	1.23489e-07	4.07919e-05	-54.2857
chr1	181613308	181613308	-	2.0728e-05	0.0012456	57.5
chr1	181804454	181804454	+	8.2079e-08	3.08652e-05	-56.446
chr1	181882495	181882495	+	1.26812e-08	8.67878e-06	67.6208
chr1	182027466	182027466	-	6.66346e-06	0.000589687	-56.4027
chr1	182033575	182033575	+	1.93199e-08	1.1585e-05	-63.9785
chr1	182059658	182059658	+	3.06161e-05	0.00160824	52.2267
chr1	182108582	182108582	-	2.41247e-07	6.40931e-05	51.9504
chr1	182110544	182110544	+	1.27057e-05	0.000902923	-59.5238
chr1	182111168	182111168	+	6.75022e-08	2.69247e-05	67.297
chr1	182142306	182142306	-	3.57823e-07	8.37429e-05	-62.963
chr1	182143975	182143975	+	3.36499e-05	0.00171158	55.2707
chr1	182192041	182192041	-	2.84858e-05	0.00153249	56.7029
chr1	182238253	182238253	-	2.24362e-05	0.00131121	53.814
chr1	182283554	182283554	+	4.81002e-08	2.12777e-05	-57.5893
chr1	182368947	182368947	-	1.02318e-06	0.000168689	57.1429
chr1	182371255	182371255	-	1.8728e-07	5.40234e-05	51.0812
chr1	182427584	182427584	+	2.93761e-05	0.00156568	52.9138
chr1	182488050	182488050	+	1.58751e-05	0.00104648	-52.906
chr1	182540442	182540442	+	1.40585e-07	4.44337e-05	59.7577
chr1	182613148	182613148	+	1.64107e-05	0.00106844	-54.01
chr1	182641965	182641965	-	1.91578e-09	2.33477e-06	59.4848
chr1	182651623	182651623	-	1.25256e-05	0.000894573	53.125
chr1	182669848	182669848	-	1.20652e-08	8.37173e-06	-55
chr1	182777483	182777483	+	4.34132e-06	0.000443291	54.6027
chr1	182789801	182789801	+	7.39806e-09	5.97013e-06	-64.8649
chr1	182817631	182817631	-	6.5834e-08	2.64559e-05	57.7291
chr1	182838230	182838230	-	8.49315e-08	3.16111e-05	-59.5579
chr1	182841508	182841508	+	4.76833e-07	0.000101334	-50.4637
chr1	182849588	182849588	-	4.23403e-07	9.37289e-05	58.0049
chr1	182856247	182856247	-	0.000223849	0.00589387	-52.9791
chr1	182858962	182858962	+	8.05143e-06	0.000667898	-57.6803
chr1	182896445	182896445	-	1.50201e-06	0.000218085	-51.0417
chr1	183043620	183043620	-	1.16838e-07	3.93357e-05	67.5325
chr1	183083604	183083604	-	2.14595e-07	5.92101e-05	-56.7506
chr1	183108111	183108111	-	8.45427e-09	6.57955e-06	75.8621
chr1	183249365	183249365	+	8.40627e-05	0.00311552	-57.1429
chr1	183266448	183266448	-	6.68917e-06	0.000591226	-55.7692
chr1	183347566	183347566	+	0.000102718	0.00354812	50.625
chr1	183397122	183397122	+	3.48095e-07	8.21343e-05	-64.4676
chr1	183397241	183397241	+	3.55306e-08	1.73976e-05	-52.6897
chr1	183504495	183504495	+	4.62529e-05	0.00210754	52.9828
chr1	183509647	183509647	-	5.83459e-07	0.000116067	-58.6687
chr1	183559016	183559016	+	5.83916e-06	0.000540243	50.4831
chr1	183619506	183619506	-	5.00198e-07	0.000104398	55.2632
chr1	183662842	183662842	+	1.33277e-07	4.28264e-05	50.2463
chr1	183680000	183680000	+	2.3696e-05	0.00135983	50.4873
chr1	183766971	183766971	-	3.60544e-07	8.41782e-05	51.0078
chr1	183778822	183778822	+	5.01959e-05	0.00222441	-51.5152
chr1	184042831	184042831	+	8.98868e-11	2.6862e-07	61.287
chr1	184076080	184076080	+	8.07622e-07	0.000143716	59.596
chr1	184104141	184104141	-	1.04469e-05	0.000793169	-63.2381
chr1	184129222	184129222	+	2.16592e-07	5.95831e-05	-57.2368
chr1	184198337	184198337	-	4.72485e-08	2.1015e-05	60.7639
chr1	184211768	184211768	-	1.15491e-05	0.000846334	64
chr1	184383529	184383529	-	2.01182e-07	5.66308e-05	-56.4516
chr1	184447145	184447145	-	1.69701e-05	0.00109292	-60.9231
chr1	184546442	184546442	-	0.000233125	0.00604429	52.7778
chr1	184623026	184623026	+	1.76215e-05	0.00112024	-50.7678
chr1	184648178	184648178	-	1.98754e-06	0.000263178	-54.4808
chr1	184708075	184708075	-	3.44122e-06	0.000379375	58.2228
chr1	184728083	184728083	-	9.60678e-09	7.18827e-06	-77.2727
chr1	184774792	184774792	-	2.30153e-06	0.000290593	-60.3345
chr1	184789572	184789572	-	2.79525e-06	0.000330723	-51.6149
chr1	184892663	184892663	-	2.93091e-11	1.20382e-07	74.7984
chr1	184894549	184894549	-	1.28231e-11	6.6186e-08	52.6741
chr1	184899895	184899895	+	1.64339e-05	0.00106964	-61.6667
chr1	184904687	184904687	+	1.98363e-07	5.61393e-05	62.1442
chr1	184968527	184968527	-	5.51448e-06	0.00051924	52.8195
chr1	184968851	184968851	+	1.01194e-06	0.000167482	60.9524
chr1	184993990	184993990	+	2.08603e-06	0.000271892	50.3125
chr1	185009705	185009705	-	9.53057e-09	7.1446e-06	-55.5556
chr1	185210188	185210188	-	1.22824e-06	0.000190653	57.5457
chr1	185280748	185280748	-	3.7816e-11	1.46685e-07	61.7647
chr1	185285788	185285788	+	4.57255e-08	2.05999e-05	-67.8363
chr1	185341252	185341252	+	2.40698e-12	1.85884e-08	-59.4146
chr1	185371607	185371607	+	1.88319e-06	0.000253757	52.969
chr1	185471734	185471734	+	1.63224e-06	0.000230416	56.25
chr1	185482181	185482181	-	9.37843e-06	0.000738033	52.6316
chr1	185482222	185482222	-	2.60446e-07	6.73789e-05	55.814
chr1	185484366	185484366	+	1.38801e-05	0.000957208	-61.5652
chr1	185496796	185496796	-	1.5206e-05	0.00101742	52.4436
chr1	185561007	185561007	-	5.59024e-05	0.00238779	57.1429
chr1	185643825	185643825	-	5.44565e-10	9.65813e-07	67.5676
chr1	185731555	185731555	+	4.46035e-05	0.00205838	57.2308
chr1	185764127	185764127	-	1.56412e-05	0.001036	51.5672
chr1	185931341	185931341	-	1.14266e-05	0.000840436	51.9048
chr1	186195484	186195484	-	5.22016e-05	0.00228434	-51.8307
chr1	186314221	186314221	-	2.69554e-07	6.90227e-05	59.5008
chr1	186321522	186321522	-	0.000275295	0.00673163	-55.7312
chr1	186336049	186336049	+	7.06779e-06	0.000613021	-52.5
chr1	186348317	186348317	-	1.6993e-06	0.000236753	-54.0135
chr1	186529222	186529222	-	9.34639e-06	0.000736249	53.0303
chr1	186628167	186628167	+	1.16118e-06	0.00018343	51.2821
chr1	186653773	186653773	-	3.05005e-06	0.000350013	-58.818
chr1	186661117	186661117	-	3.39382e-07	8.06752e-05	62.7135
chr1	186661831	186661831	+	6.87255e-05	0.00273312	-56.4815
chr1	186661873	186661873	+	0.000233125	0.00604429	-52.7778
chr1	186684801	186684801	-	3.51515e-07	8.27064e-05	51.5152
chr1	186692033	186692033	-	3.28141e-10	6.72155e-07	52.9018
chr1	186723566	186723566	+	4.05057e-06	0.000423055	-50.28
chr1	186754514	186754514	-	6.24432e-07	0.000121119	51.1218
chr1	186795156	186795156	+	4.08317e-10	7.87639e-07	58.3333
chr1	186826822	186826822	-	4.8076e-06	0.000474268	-50.4493
chr1	186954767	186954767	-	1.23018e-13	1.84819e-09	-70.9881
chr1	186961357	186961357	+	1.81332e-06	0.000247084	-50.3833
chr1	187011352	187011352	+	4.03645e-07	9.07285e-05	-50.6061
chr1	187042143	187042143	-	3.5069e-06	0.000384297	-55.4276
chr1	187061797	187061797	-	5.8428e-07	0.000116158	-55.5556
chr1	187120408	187120408	-	1.15965e-09	1.6555e-06	63.3433
chr1	187137492	187137492	+	1.37175e-11	6.94866e-08	-68.6275
chr1	187140543	187140543	-	4.47736e-09	4.22852e-06	57.4411
chr1	187150704	187150704	-	1.10193e-06	0.000177154	-53.87
chr1	187270532	187270532	-	1.11384e-06	0.000178605	65
chr1	187327208	187327208	-	7.29158e-07	0.00013427	-50.4329
chr1	187345223	187345223	-	2.14273e-07	5.91571e-05	-55.9891
chr1	187439770	187439770	-	1.59955e-06	0.000227656	53.1092
chr1	187501745	187501745	-	1.24427e-05	0.000890199	55.8333
chr1	187607319	187607319	+	1.07879e-05	0.000809623	51.3889
chr1	187610470	187610470	+	7.54664e-07	0.000137383	61.0476
chr1	187734982	187734982	+	9.10527e-06	0.00072422	53.0952
chr1	187737387	187737387	+	1.28609e-06	0.000196117	55
chr1	187796611	187796611	+	2.66415e-05	0.00146636	-54.8701
chr1	187808498	187808498	+	3.11225e-06	0.00035437	57.1895
chr1	187870913	187870913	-	1.44289e-07	4.52615e-05	52.4561
chr1	187888251	187888251	-	1.06169e-08	7.65145e-06	56.4103
chr1	188018695	188018695	-	1.2737e-08	8.70078e-06	-57.6923
chr1	188065369	188065369	+	8.81225e-07	0.000152649	52.6829
chr1	188108068	188108068	+	6.25316e-06	0.000565961	-51.5152
chr1	188185293	188185293	-	3.34728e-05	0.00170556	54.5249
chr1	188293973	188293973	+	1.84359e-06	0.000250058	-58.5004
chr1	188525248	188525248	+	6.47081e-08	2.61395e-05	51.5865
chr1	188662165	188662165	-	3.8245e-05	0.00185984	50.2165
chr1	188684260	188684260	+	8.01611e-08	3.03331e-05	-68
chr1	188755496	188755496	+	1.11007e-07	3.79386e-05	59.6525
chr1	188830749	188830749	+	5.35906e-08	2.29144e-05	51.8895
chr1	188856421	188856421	-	4.94492e-08	2.16828e-05	-62.6374
chr1	188877937	188877937	-	4.32956e-09	4.1172e-06	65.873
chr1	188897058	188897058	-	5.09877e-06	0.000492994	-54.6154
chr1	188906768	188906768	+	5.47118e-11	1.90386e-07	-55.814
chr1	188910584	188910584	-	1.57277e-07	4.79987e-05	-58.8629
chr1	188936495	188936495	-	2.06139e-07	5.75523e-05	-52.0301
chr1	188994814	188994814	-	4.01348e-06	0.000420276	57.6923
chr1	189023681	189023681	-	7.15706e-07	0.000132463	-55.7143
chr1	189075981	189075981	+	1.6167e-05	0.00105805	-52.8226
chr1	189097069	189097069	-	4.41635e-07	9.6251e-05	-55.3872
chr1	189257435	189257435	+	2.4811e-06	0.000305032	58.9744
chr1	189387666	189387666	+	1.26434e-05	0.000899909	-55.7809
chr1	189387679	189387679	+	6.82411e-07	0.000128315	-60.8597
chr1	189431744	189431744	-	2.11037e-08	1.22676e-05	-51.5843
chr1	189632734	189632734	-	4.45648e-06	0.000450719	52.4199
chr1	189726749	189726749	-	8.84078e-09	6.78582e-06	56.0237
chr1	189786378	189786378	+	4.30845e-08	1.9762e-05	50.1587
chr1	189842398	189842398	-	7.39479e-08	2.86621e-05	-65.7895
chr1	189844040	189844040	-	2.9749e-06	0.000344443	-54.5455
chr1	189910279	189910279	+	4.27726e-07	9.43964e-05	-50.5102
chr1	189920789	189920789	+	1.52888e-05	0.00102112	-53.9886
chr1	189968673	189968673	-	1.85695e-05	0.00115783	-50.3788
chr1	190080079	190080079	-	1.15491e-05	0.000846334	-63.3779
chr1	190096018	190096018	+	1.15611e-06	0.000182972	-60.1709
chr1	190134056	190134056	-	1.05922e-06	0.000172556	-52.6316
chr1	190134891	190134891	+	1.99009e-08	1.18095e-05	-50.8772
chr1	190135730	190135730	+	5.072e-09	4.59965e-06	-85.9307
chr1	190135753	190135753	-	4.69378e-08	2.09281e-05	69.6329
chr1	190138020	190138020	+	1.94352e-06	0.000259187	50.5517
chr1	190138563	190138563	+	2.77658e-06	0.000329308	-66.3594
chr1	190139662	190139662	+	1.30554e-06	0.000198306	-59.4877
chr1	190192479	190192479	-	1.07632e-08	7.72068e-06	64.4986
chr1	190214970	190214970	+	8.23535e-07	0.000145846	-60.5263
chr1	190295388	190295388	+	8.7027e-07	0.000151424	55.3191
chr1	190297908	190297908	-	4.52416e-06	0.000454974	-52.1879
chr1	190299675	190299675	+	5.15575e-07	0.000106705	-51.4453
chr1	190333333	190333333	+	1.24213e-06	0.00019202	-59.824
chr1	190387191	190387191	-	2.32445e-05	0.00134218	-53.9377
chr1	190425630	190425630	+	2.92398e-08	1.52865e-05	55.3602
chr1	190446659	190446659	+	1.28073e-08	8.73118e-06	-55.8741
chr1	190480926	190480926	+	2.50234e-09	2.8179e-06	62.963
chr1	190494816	190494816	+	1.16211e-06	0.000183507	62.9588
chr1	190554076	190554076	-	2.08348e-07	5.79747e-05	-54.2125
chr1	190567233	190567233	+	3.96678e-06	0.000417072	-58.9286
chr1	190655321	190655321	-	1.43173e-11	7.15368e-08	-70.0828
chr1	190695636	190695636	-	8.72749e-05	0.00319268	-54.7674
chr1	190722855	190722855	-	9.8531e-18	5.42161e-13	78.6233
chr1	190761652	190761652	-	2.80138e-07	7.09811e-05	-57.8853
chr1	190762240	190762240	+	3.52024e-12	2.50565e-08	-82.6628
chr1	190791468	190791468	+	1.0923e-09	1.58898e-06	73.5714
chr1	190830246	190830246	-	2.49244e-07	6.54943e-05	-57.1185
chr1	190846941	190846941	+	2.15429e-06	0.000278017	-52.451
chr1	190872548	190872548	-	1.10092e-07	3.77342e-05	-53.8462
chr1	190941108	190941108	-	1.65356e-07	4.96277e-05	-56.6785
chr1	191250824	191250824	-	2.63453e-05	0.00145537	-50.152
chr1	191258898	191258898	+	1.31723e-05	0.000924044	-54.5543
chr1	191269721	191269721	+	0.000661754	0.0118376	-51.581
chr1	191280925	191280925	-	1.73441e-08	1.07306e-05	67.1958
chr1	191352345	191352345	+	7.27209e-06	0.000624062	51.5406
chr1	191374775	191374775	-	7.9248e-06	0.000660392	-56.4206
chr1	191477653	191477653	-	7.9146e-06	0.000659705	63.986
chr1	191612744	191612744	-	3.36499e-05	0.00171158	55.5556
chr1	191643037	191643037	+	5.05318e-07	0.000105238	-52.3166
chr1	191803337	191803337	-	1.13057e-10	3.16584e-07	79.3028
chr1	191822389	191822389	+	9.19855e-08	3.33951e-05	-52.5926
chr1	191944106	191944106	+	2.36333e-09	2.69738e-06	-58.8235
chr1	191985354	191985354	+	4.43671e-05	0.00205194	-55.2124
chr1	191985356	191985356	+	0.000282031	0.00684191	-50.5792
chr1	192070588	192070588	+	1.62944e-07	4.91889e-05	-54.7965
chr1	192070598	192070598	+	8.07729e-06	0.000669248	-54.9858
chr1	192071293	192071293	-	2.22126e-11	9.9167e-08	-81.0484
chr1	192088075	192088075	-	3.91778e-06	0.000413538	52.4601
chr1	192093426	192093426	+	2.02143e-06	0.000266271	-53.3516
chr1	192151477	192151477	+	9.12746e-07	0.000156112	58.3333
chr1	192269126	192269126	+	4.59884e-07	9.88635e-05	67.8571
chr1	192348918	192348918	-	5.5627e-05	0.0023801	-52.8139
chr1	192369755	192369755	-	1.58419e-05	0.00104485	-64.6154
chr1	192448819	192448819	-	1.17702e-12	1.12013e-08	-60.1732
chr1	192473258	192473258	-	1.84652e-09	2.27555e-06	59.7424
chr1	192522789	192522789	-	2.44052e-07	6.45966e-05	67.2494
chr1	192607821	192607821	+	9.62688e-10	1.45122e-06	-74.1872
chr1	192683205	192683205	+	3.34339e-07	7.98775e-05	64.0212
chr1	192730814	192730814	-	1.52073e-06	0.000219736	-59.5031
chr1	192755795	192755795	+	1.75135e-06	0.000241734	53.9373
chr1	192762530	192762530	+	2.15181e-09	2.5296e-06	-74.2857
chr1	192796253	192796253	-	2.43512e-08	1.34563e-05	-70.4301
chr1	192804698	192804698	-	9.7276e-10	1.46061e-06	70.3416
chr1	192804716	192804716	-	1.58639e-07	4.82465e-05	61.6667
chr1	192817745	192817745	+	6.7243e-07	0.000127154	50.1984
chr1	192825956	192825956	+	1.69876e-06	0.000236711	50.6207
chr1	193112231	193112231	-	8.74047e-06	0.000704693	51.8145
chr1	193127526	193127526	+	5.32659e-06	0.000507259	-54.5455
chr1	193228388	193228388	-	1.97349e-06	0.000261916	51.2281
chr1	193281849	193281849	-	4.27471e-09	4.08711e-06	-59.9613
chr1	193316644	193316644	-	6.39745e-07	0.000122989	61.9458
chr1	193330120	193330120	-	4.17766e-05	0.00197134	-52.9814
chr1	193364164	193364164	-	1.01101e-05	0.00077563	-50.299
chr1	193374397	193374397	-	5.80521e-08	2.42036e-05	-54.669
chr1	193484257	193484257	-	4.41573e-07	9.6251e-05	54.2443
chr1	193540064	193540064	-	2.37023e-05	0.00136009	-51.6234
chr1	193663269	193663269	+	3.43943e-09	3.50689e-06	62.8571
chr1	193844732	193844732	-	3.04749e-09	3.22959e-06	-75.6892
chr1	193936182	193936182	+	0.000579908	0.0108789	51.1364
chr1	193993403	193993403	-	6.24677e-08	2.54874e-05	-60.7335
chr1	194396123	194396123	+	1.07161e-06	0.00017388	-56.746
chr1	194642800	194642800	-	8.29668e-08	3.11178e-05	-57.7248
chr1	194949520	194949520	-	6.80751e-05	0.00271649	50.9284
chr1	195004516	195004516	-	4.40929e-06	0.000447431	50.1984
chr1	195248126	195248126	+	7.45332e-08	2.88381e-05	-72.7273
chr1	195320504	195320504	+	4.44939e-05	0.00205573	-51.7157
chr1	195330413	195330413	-	1.56013e-05	0.00103454	50.303
chr10	3306094	3306094	-	0.000325523	0.00750468	50.5797
chr10	3501749	3501749	-	1.09154e-08	7.78498e-06	53.6585
chr10	3548655	3548655	-	4.37901e-10	8.2766e-07	55.8677
chr10	3810672	3810672	-	9.57169e-07	0.000161242	-54.3612
chr10	3839541	3839541	-	0.000701969	0.0123222	50.0741
chr10	3870886	3870886	-	6.01834e-08	2.48619e-05	-57.6923
chr10	3996189	3996189	-	2.32999e-05	0.00134438	54.2857
chr10	4069635	4069635	-	6.3979e-06	0.000574338	58.0645
chr10	4102949	4102949	+	4.57588e-06	0.000458531	60
chr10	4179222	4179222	+	3.58259e-05	0.00178178	56.662
chr10	4276315	4276315	+	2.61618e-06	0.000316242	-51.4286
chr10	4410911	4410911	-	5.4425e-06	0.000514797	-55.5288
chr10	4441070	4441070	+	8.32599e-08	3.11973e-05	53.5563
chr10	4454238	4454238	-	3.69516e-06	0.000397612	54.0541
chr10	4493186	4493186	+	2.13354e-07	5.89688e-05	-51.4479
chr10	4621216	4621216	-	1.20153e-05	0.000869644	-50.463
chr10	4621250	4621250	+	5.01461e-07	0.000104602	57.5881
chr10	4753545	4753545	+	3.54569e-09	3.58392e-06	60.2541
chr10	4877017	4877017	+	2.54134e-08	1.39054e-05	53.4664
chr10	5039288	5039288	+	7.09007e-08	2.78413e-05	-61.1765
chr10	5149148	5149148	+	1.33937e-06	0.000201802	-53.4808
chr10	5176548	5176548	-	3.51062e-06	0.000384505	53.0129
chr10	5199766	5199766	+	1.69948e-08	1.05934e-05	59.688
chr10	5490974	5490974	+	3.81005e-07	8.72659e-05	59.7166
chr10	5504156	5504156	-	2.61611e-08	1.41666e-05	52.2199
chr10	5505087	5505087	-	4.93189e-09	4.5135e-06	59.0301
chr10	5791025	5791025	-	3.67876e-06	0.000396507	55.2707
chr10	5858422	5858422	+	5.7579e-08	2.40474e-05	56
chr10	6157275	6157275	+	6.77107e-05	0.00270786	-57.7778
chr10	6242218	6242218	-	0.000438415	0.0090993	-52.9524
chr10	6341677	6341677	-	1.04999e-06	0.000171623	-59.7372
chr10	6367710	6367710	-	3.29545e-05	0.00168838	-50.4329
chr10	6418002	6418002	-	1.09799e-05	0.000818648	-59.1787
chr10	6418075	6418075	-	3.46749e-07	8.19044e-05	-60.9697
chr10	6799759	6799759	-	5.80566e-07	0.000115719	-53.2928
chr10	6890681	6890681	+	9.24357e-07	0.000157633	-64.4444
chr10	6896483	6896483	-	1.27592e-05	0.000904958	-51.1923
chr10	7035857	7035857	-	0.000179635	0.00511362	-50.9677
chr10	7063710	7063710	+	5.9267e-05	0.00247884	50.8333
chr10	7163658	7163658	-	1.45423e-07	4.55052e-05	54.0758
chr10	7265186	7265186	-	3.01729e-06	0.000347552	-56.4103
chr10	7346051	7346051	+	8.53713e-05	0.00314688	-53.4632
chr10	7676794	7676794	+	1.99357e-08	1.18248e-05	66.3842
chr10	7784666	7784666	-	3.76672e-06	0.000402691	54.1667
chr10	7814627	7814627	-	1.15205e-06	0.00018261	-61.3426
chr10	7993985	7993985	-	8.47743e-08	3.15738e-05	-54.8611
chr10	8055439	8055439	+	8.26195e-08	3.10154e-05	52
chr10	8084558	8084558	-	0.000275067	0.00672796	53.6232
chr10	8529497	8529497	-	1.64206e-07	4.94614e-05	52.585
chr10	8550556	8550556	+	3.01427e-05	0.00159158	-55.1932
chr10	8550583	8550583	+	2.28286e-07	6.17038e-05	-67.1498
chr10	8715616	8715616	-	1.12416e-08	7.95196e-06	-63.4806
chr10	8810743	8810743	+	8.53233e-10	1.33282e-06	52.2362
chr10	8817038	8817038	+	1.1168e-05	0.000827623	52.2131
chr10	8857814	8857814	-	5.92048e-08	2.45795e-05	53.5335
chr10	8929036	8929036	+	9.17838e-09	6.97702e-06	51.25
chr10	9176830	9176830	-	1.21288e-05	0.000875437	67.2727
chr10	9242953	9242953	-	9.72525e-05	0.00342607	50.9259
chr10	9242958	9242958	-	1.50633e-06	0.00021842	64.4608
chr10	9271497	9271497	-	5.41989e-07	0.000110304	-58.5859
chr10	9334358	9334358	+	2.18246e-08	1.25534e-05	52.0833
chr10	9429562	9429562	+	3.0818e-06	0.000352264	52.1739
chr10	9593020	9593020	-	3.44812e-06	0.000379803	-56
chr10	9605928	9605928	-	3.45829e-05	0.00174183	-50.2439
chr10	9975689	9975689	-	1.7906e-05	0.00113259	60.6061
chr10	9983562	9983562	-	8.80269e-10	1.36767e-06	-69.7111
chr10	10229965	10229965	-	1.09504e-07	3.75911e-05	-63.6752
chr10	10480946	10480946	+	4.9781e-09	4.54253e-06	58.0645
chr10	10488340	10488340	+	4.28264e-07	9.44534e-05	57.1895
chr10	10734948	10734948	-	4.46661e-07	9.69948e-05	60.195
chr10	10749754	10749754	-	1.33121e-07	4.28055e-05	-53.7391
chr10	10893309	10893309	+	1.92175e-05	0.00118535	-53.0735
chr10	10988908	10988908	-	8.13258e-06	0.000671916	-56.5217
chr10	11047521	11047521	-	1.62766e-08	1.02783e-05	55.3922
chr10	11059267	11059267	+	2.53906e-05	0.00142177	-59.3103
chr10	11308443	11308443	+	3.67982e-06	0.000396548	-58.9674
chr10	11432249	11432249	+	0.000104974	0.00359932	50.576
chr10	11435097	11435097	-	4.83782e-07	0.000102256	-50.2924
chr10	11439377	11439377	+	4.43998e-05	0.00205307	51.9022
chr10	11456720	11456720	+	1.12346e-07	3.8239e-05	-58.7658
chr10	11661733	11661733	+	2.97547e-05	0.00157833	-55.4545
chr10	11968365	11968365	+	1.36318e-08	9.09057e-06	67.754
chr10	12579478	12579478	+	0.000124075	0.00401401	-54.7504
chr10	12585131	12585131	+	1.08043e-05	0.000810357	-55.3427
chr10	12642509	12642509	-	1.2935e-07	4.19968e-05	-51.3889
chr10	12646043	12646043	+	8.69983e-07	0.000151404	62.4865
chr10	12749088	12749088	-	7.66682e-07	0.000138835	54.912
chr10	12782268	12782268	+	8.39117e-05	0.00311173	-51.6098
chr10	12987923	12987923	+	1.33982e-08	8.98647e-06	60.8696
chr10	12996577	12996577	+	0.00017525	0.00502706	-50.641
chr10	13090696	13090696	-	5.71876e-06	0.000532479	62.5
chr10	13090700	13090700	-	4.43056e-07	9.64316e-05	67.7083
chr10	13090708	13090708	-	2.17229e-07	5.96973e-05	67.1171
chr10	13090735	13090735	-	4.1317e-07	9.21074e-05	58.0931
chr10	13090756	13090756	-	1.52105e-06	0.000219751	54.6053
chr10	13090765	13090765	-	1.52105e-06	0.000219751	54.6053
chr10	13090793	13090793	-	1.20635e-06	0.000188054	56.6214
chr10	13127733	13127733	-	7.50495e-09	6.02086e-06	56.3342
chr10	13127746	13127746	-	2.53598e-11	1.09767e-07	62.3377
chr10	13138538	13138538	+	7.0844e-07	0.000131511	67.7419
chr10	13236971	13236971	+	1.2014e-08	8.35511e-06	54.2828
chr10	13379486	13379486	-	4.80151e-05	0.00215967	-63.6364
chr10	13502472	13502472	-	4.22446e-09	4.05316e-06	65.3846
chr10	13571147	13571147	+	6.88114e-07	0.000129046	70.6076
chr10	13621722	13621722	-	0.000177576	0.00507275	53.6207
chr10	13653105	13653105	-	1.94912e-08	1.16541e-05	55.9009
chr10	13688329	13688329	+	7.39824e-08	2.86708e-05	-62.2537
chr10	13688678	13688678	+	1.74802e-05	0.00111425	-50.9259
chr10	13915671	13915671	-	3.13281e-07	7.63973e-05	55.2867
chr10	14020042	14020042	+	9.73424e-07	0.000163125	-50.641
chr10	14179413	14179413	+	4.65644e-08	2.08604e-05	54.3478
chr10	14179459	14179459	+	1.46754e-08	9.57327e-06	50.9693
chr10	14482831	14482831	-	1.48317e-06	0.000216137	-59.3297
chr10	14571555	14571555	-	9.74751e-06	0.000756761	56.6667
chr10	14725949	14725949	+	3.6425e-09	3.63832e-06	70.2083
[truncated: 25,980 more rows]

## Sheet: mCHG (= mCCG, mCAG, and mCTG)
CHR	start	end	strand	P value	Q value	% Diff
chr1	3609199	3609199	-	1.2282e-07	0.000388596	-63.8776
chr1	4569890	4569890	+	2.59567e-05	0.00921826	-56.5217
chr1	5002136	5002136	-	2.32397e-08	0.000142062	50.0988
chr1	7108823	7108823	-	1.53055e-06	0.00180952	-63.37
chr1	7402245	7402245	-	3.57823e-07	0.000759019	61.5385
chr1	9853012	9853012	+	2.46638e-06	0.00240815	53.3333
chr1	10269911	10269911	+	4.08359e-06	0.00322215	51.5152
chr1	10681332	10681332	-	8.13258e-06	0.00474972	-56.5217
chr1	10873394	10873394	+	6.92706e-08	0.000274093	-63.8889
chr1	11378039	11378039	+	1.77434e-06	0.0019731	55.8824
chr1	11506651	11506651	+	4.29594e-08	0.000205349	54.1667
chr1	12171664	12171664	+	1.59536e-08	0.000112975	57.0106
chr1	12817818	12817818	-	7.91025e-07	0.00122438	-54.1667
chr1	13033350	13033350	+	4.66439e-05	0.0127127	-51.4778
chr1	13039370	13039370	-	4.64923e-06	0.00346206	59.2789
chr1	13106280	13106280	-	2.199e-06	0.00225026	-51.6129
chr1	13687086	13687086	-	3.33138e-07	0.000725735	54.0887
chr1	13779247	13779247	+	0.00027347	0.0328467	-53.3333
chr1	14633955	14633955	-	4.527e-06	0.00340905	-53.125
chr1	15148148	15148148	-	6.87641e-07	0.00112492	50.0309
chr1	15889735	15889735	-	1.75468e-09	2.7824e-05	60.4167
chr1	16699510	16699510	+	1.54478e-05	0.00685744	51.0417
chr1	16963557	16963557	-	8.57285e-09	7.81088e-05	-56.25
chr1	17090273	17090273	-	1.1601e-12	1.35577e-07	65.0794
chr1	17424119	17424119	+	1.23659e-07	0.000390253	-53.0876
chr1	17509970	17509970	+	1.1969e-05	0.00592428	53.125
chr1	18302551	18302551	-	6.08832e-09	6.32355e-05	-67.7906
chr1	18940555	18940555	-	7.48787e-05	0.0164575	50.7958
chr1	19899396	19899396	-	1.39365e-05	0.00646137	-57.1429
chr1	20045936	20045936	+	9.8053e-05	0.0190367	52.8139
chr1	21630245	21630245	-	1.00005e-08	8.53525e-05	-64.2857
chr1	25333034	25333034	+	9.66212e-07	0.00137785	-52.1739
chr1	25837752	25837752	+	2.20735e-08	0.000138147	66.6667
chr1	26127615	26127615	-	4.08359e-06	0.00322215	51.5152
chr1	27509525	27509525	+	6.11148e-08	0.000254685	56.8109
chr1	29210922	29210922	-	3.10048e-06	0.0027369	54.8387
chr1	29577794	29577794	+	6.03885e-08	0.000252793	-55.1724
chr1	30033548	30033548	-	0.00027905	0.0332437	51.1396
chr1	30720900	30720900	-	6.16102e-08	0.000255784	-51.3514
chr1	30845841	30845841	+	9.68898e-09	8.37049e-05	59.1667
chr1	31662857	31662857	-	3.31086e-07	0.000723608	62.9735
chr1	32899157	32899157	+	1.48088e-05	0.00670104	-50.8333
chr1	33175124	33175124	+	7.77224e-07	0.00121262	60.0427
chr1	33976525	33976525	-	1.27403e-08	9.83832e-05	58.2447
chr1	34264882	34264882	-	4.27162e-07	0.00084193	53.3026
chr1	35533054	35533054	-	2.93898e-05	0.0098801	-51.9676
chr1	35642542	35642542	-	1.10193e-06	0.00148915	-53.87
chr1	35824869	35824869	-	5.94079e-07	0.00102485	-52.9954
chr1	36544410	36544410	+	5.8618e-06	0.00396272	55.5556
chr1	36558484	36558484	+	1.0995e-06	0.00148841	51.7241
chr1	36631982	36631982	-	1.76309e-06	0.0019659	-59.3915
chr1	37718775	37718775	-	5.25882e-08	0.000231656	54.1667
chr1	37793479	37793479	+	2.24222e-10	7.09578e-06	-50.9434
chr1	38760822	38760822	-	5.9471e-06	0.00399509	53.6125
chr1	39412263	39412263	-	1.37794e-08	0.000102978	-52.0132
chr1	39509767	39509767	-	1.23964e-06	0.00159712	53.8194
chr1	40659902	40659902	+	1.23612e-05	0.00603394	-51.8519
chr1	42221587	42221587	+	5.31688e-11	2.47378e-06	-67.4747
chr1	42491002	42491002	+	1.07371e-06	0.00146445	-58.1472
chr1	43126276	43126276	+	1.65468e-05	0.00713384	-55
chr1	46178942	46178942	-	0.000128888	0.0220732	52.5466
chr1	46715072	46715072	+	5.65673e-05	0.0140921	-50.9524
chr1	46876384	46876384	+	8.90513e-07	0.0013126	64.5161
chr1	47496433	47496433	+	2.88065e-06	0.00262978	-55.5556
chr1	48431838	48431838	+	1.79567e-06	0.00198818	50.084
chr1	49502070	49502070	+	2.20353e-09	3.25099e-05	65.9091
chr1	51282105	51282105	-	9.95042e-10	1.90933e-05	-58.9827
chr1	51457233	51457233	-	9.94835e-12	7.98133e-07	-54.2373
chr1	51598366	51598366	+	5.83931e-06	0.00395689	-52.381
chr1	51840601	51840601	-	5.8428e-07	0.00101592	-55.5556
chr1	51866704	51866704	+	6.04002e-07	0.00103598	-63.5417
chr1	52117110	52117110	-	1.19275e-05	0.00591417	-52.5
chr1	52607816	52607816	-	2.62831e-06	0.00249594	-63.3333
chr1	52728937	52728937	+	6.18797e-06	0.00407159	57.1429
chr1	55223655	55223655	-	7.03969e-09	6.91489e-05	-71.9697
chr1	55680051	55680051	-	7.51267e-06	0.00454265	59.7436
chr1	55701789	55701789	+	9.92767e-09	8.50737e-05	54.0043
chr1	56770961	56770961	+	4.72858e-08	0.000216344	-54.3089
chr1	56973563	56973563	+	8.28855e-07	0.00125787	-60
chr1	57352316	57352316	+	5.22496e-06	0.00370235	-52.8233
chr1	57624501	57624501	-	2.0075e-05	0.0079776	54.5139
chr1	57870116	57870116	+	7.50102e-06	0.00453764	-51.9841
chr1	57870869	57870869	-	1.78263e-06	0.00197756	-51.2821
chr1	58138931	58138931	-	6.93952e-07	0.00113171	-52.381
chr1	58723031	58723031	-	1.15121e-05	0.00579399	-52.6667
chr1	59119930	59119930	-	2.24842e-05	0.00849705	-56.5217
chr1	59167000	59167000	+	1.90011e-07	0.000510067	54.1667
chr1	59440024	59440024	+	6.96116e-08	0.00027506	51.2821
chr1	60700735	60700735	-	2.66752e-08	0.000154173	-51.4955
chr1	61258527	61258527	+	5.74011e-08	0.000245449	70
chr1	61357607	61357607	+	4.73394e-09	5.4062e-05	-63.5526
chr1	62518005	62518005	-	5.01833e-09	5.61885e-05	52.5046
chr1	64004246	64004246	+	2.27296e-06	0.00229395	-57.0806
chr1	64188329	64188329	-	8.56592e-06	0.00489293	50.7336
chr1	66710650	66710650	-	0.000118749	0.0211334	53.5714
chr1	67389164	67389164	-	8.13258e-06	0.00474972	56.5217
chr1	67399285	67399285	-	3.97373e-10	1.0275e-05	-62.5315
chr1	67663987	67663987	+	1.50771e-05	0.00676979	-55.8333
chr1	68315756	68315756	+	1.16878e-08	9.35158e-05	-51.7241
chr1	68910647	68910647	+	1.56222e-08	0.000111905	71.4286
chr1	69356677	69356677	-	2.35689e-10	7.30942e-06	51.6667
chr1	69527813	69527813	+	1.34149e-08	0.000101371	-52.1739
chr1	70270825	70270825	+	8.78805e-06	0.00496796	53.3333
chr1	70501933	70501933	+	9.10307e-07	0.00132942	-55
chr1	70783772	70783772	+	2.46246e-06	0.00240559	51.6129
chr1	71270911	71270911	-	3.96187e-05	0.0116484	-55.1724
chr1	72733378	72733378	-	3.48417e-09	4.45904e-05	-53.3333
chr1	72756329	72756329	-	1.1999e-06	0.00156383	53.8462
chr1	73168383	73168383	-	9.00378e-10	1.78375e-05	-54.3478
chr1	73499515	73499515	-	3.45329e-08	0.0001806	-52.5538
chr1	73671113	73671113	+	5.40711e-06	0.00377235	51.0526
chr1	74100349	74100349	-	6.24428e-08	0.00025776	51.4286
chr1	74313091	74313091	-	7.28668e-06	0.0044763	58.069
chr1	74385316	74385316	+	6.98285e-11	3.0393e-06	-65.5172
chr1	74712538	74712538	-	5.62313e-05	0.0140591	-55.9524
chr1	74718103	74718103	-	3.47356e-07	0.000744217	56.5217
chr1	75532383	75532383	+	1.24218e-08	9.68816e-05	-54.3478
chr1	76573369	76573369	-	2.37023e-05	0.00876021	-51.6234
chr1	78150040	78150040	-	1.22135e-06	0.00158268	-55.5556
chr1	78166172	78166172	+	1.41457e-07	0.000425349	56.8254
chr1	78230008	78230008	+	2.45975e-06	0.00240475	55.1724
chr1	78293377	78293377	-	9.50142e-08	0.000331425	52.9412
chr1	78368396	78368396	-	3.19136e-06	0.00278791	52.6316
chr1	78815298	78815298	+	4.48283e-14	8.53008e-09	65
chr1	79303390	79303390	+	6.33145e-06	0.0041321	51.1628
chr1	79336975	79336975	+	3.97476e-08	0.000195786	-60.4167
chr1	79812178	79812178	+	1.0322e-06	0.00143236	55.2632
chr1	80034986	80034986	+	5.59513e-07	0.000988496	-50.4909
chr1	80476619	80476619	-	1.18837e-07	0.000379799	59.2593
chr1	81013211	81013211	-	9.35975e-07	0.00135253	-63.6364
chr1	81113109	81113109	-	1.45193e-08	0.000107052	-56.748
chr1	81748794	81748794	-	2.77321e-05	0.00956704	51.2255
chr1	81962191	81962191	+	1.70974e-05	0.00728281	-57.6923
chr1	82212214	82212214	+	9.63033e-06	0.00524011	-56
chr1	82380261	82380261	+	8.03387e-07	0.00123234	-56.5978
chr1	83297965	83297965	-	7.58169e-05	0.0165697	50.9146
chr1	83783413	83783413	-	7.04581e-13	9.01506e-08	72.7273
chr1	83888205	83888205	-	4.92856e-07	0.000916211	55.7808
chr1	84038202	84038202	+	3.28388e-06	0.00283849	50.1587
chr1	84282494	84282494	+	8.31981e-09	7.66502e-05	52.2727
chr1	84551474	84551474	-	4.53869e-07	0.000871751	50.5589
chr1	84985085	84985085	+	4.93426e-05	0.0131262	55.5556
chr1	85501798	85501798	+	4.23581e-05	0.0120833	-54.2413
chr1	85753072	85753072	-	2.44943e-09	3.47678e-05	-64.4116
chr1	86206466	86206466	+	0.000164799	0.0252097	52.381
chr1	86646944	86646944	-	0.000185876	0.0269071	52.6154
chr1	87193574	87193574	-	1.4489e-05	0.0066138	52.1552
chr1	88246133	88246133	-	4.95779e-07	0.000919571	-52.7462
chr1	88886039	88886039	+	2.97104e-05	0.00993568	52.8409
chr1	89316964	89316964	+	1.83332e-08	0.000124248	-56.0529
chr1	89509941	89509941	+	9.81796e-07	0.00139032	-58.0645
chr1	90421296	90421296	-	4.58601e-09	5.28463e-05	65.7143
chr1	90481972	90481972	+	1.36869e-07	0.000415678	-50.0483
chr1	90941916	90941916	+	3.46947e-08	0.000181193	53.4277
chr1	91151638	91151638	+	4.84625e-07	0.000908534	61.7647
chr1	91344033	91344033	-	5.31e-05	0.0136584	52
chr1	91602841	91602841	+	1.23674e-10	4.60048e-06	-56.7547
chr1	91715704	91715704	-	1.8731e-12	2.02925e-07	59.5238
chr1	91877566	91877566	-	3.85262e-09	4.7532e-05	55.4545
chr1	92520433	92520433	-	3.63731e-09	4.59841e-05	57.7851
chr1	93568763	93568763	-	1.66376e-06	0.00190245	-53.8462
chr1	95502496	95502496	-	1.54428e-07	0.000448979	58.8235
chr1	95652776	95652776	+	9.33955e-06	0.00514622	51.7241
chr1	95841196	95841196	+	1.64771e-06	0.0018916	-51.5152
chr1	97873951	97873951	+	2.7403e-11	1.57643e-06	-60.6132
chr1	98327623	98327623	-	0.000195954	0.0276328	52.5974
chr1	98858292	98858292	+	7.11526e-06	0.00441506	52.0039
chr1	100086360	100086360	-	7.13802e-08	0.000278635	-57.2222
chr1	100867652	100867652	+	6.08543e-07	0.00104128	-50.918
chr1	101515698	101515698	+	1.26024e-06	0.00161041	-60.1326
chr1	103779013	103779013	+	1.37959e-06	0.0016994	51.7857
chr1	104409442	104409442	-	1.32624e-05	0.00628249	54.8387
chr1	105111694	105111694	+	4.75893e-07	0.00089772	60.875
chr1	105286346	105286346	-	1.63693e-06	0.00188317	-50.7719
chr1	105327731	105327731	-	7.57512e-09	7.22563e-05	-56.3776
chr1	105765599	105765599	-	2.06696e-07	0.000537149	56.8059
chr1	106068567	106068567	-	3.7625e-07	0.000780481	-56.1262
chr1	106595140	106595140	-	2.94241e-07	0.000670942	57.2755
chr1	106960173	106960173	+	2.48979e-06	0.00241986	-53.3333
chr1	107916458	107916458	-	1.97756e-06	0.00210705	-51.8519
chr1	109540249	109540249	-	2.44406e-08	0.000145859	65.7143
chr1	110532178	110532178	-	0.000118761	0.0211348	-53.4759
chr1	113240777	113240777	-	4.73056e-07	0.000894504	-58.4767
chr1	113992157	113992157	-	1.10728e-07	0.000363181	53.8324
chr1	114136108	114136108	-	1.80382e-07	0.00049481	-57.1909
chr1	114318850	114318850	+	3.44812e-06	0.00291505	-56
chr1	118908218	118908218	+	0.000103134	0.0195855	-50.9524
chr1	119121575	119121575	+	3.13858e-07	0.000700362	54.1344
chr1	119164817	119164817	-	2.39736e-07	0.000589006	-54.798
chr1	119246809	119246809	+	7.9674e-09	7.47517e-05	-63.6364
chr1	119649568	119649568	-	6.71241e-08	0.000269479	51.7241
chr1	119932053	119932053	+	7.03878e-07	0.00114138	-53.5714
chr1	120074882	120074882	+	5.06936e-09	5.6561e-05	64.2857
chr1	120494091	120494091	+	1.53878e-05	0.00684531	-52.9412
chr1	120763907	120763907	-	0.000143633	0.0234477	-50.6993
chr1	121200632	121200632	+	1.55563e-06	0.00182767	56.0976
chr1	121222907	121222907	-	3.70221e-08	0.000187219	70.2765
chr1	121451746	121451746	-	7.08175e-07	0.00114659	59.2949
chr1	121606461	121606461	+	1.01848e-06	0.00142205	53.9058
chr1	122574485	122574485	+	7.57956e-07	0.00119576	-54.9261
chr1	122979411	122979411	-	9.00554e-10	1.78375e-05	52.3077
chr1	124596445	124596445	+	2.54741e-09	3.58379e-05	61.4286
chr1	125683786	125683786	-	2.10288e-08	0.000134835	-59.3826
chr1	125704802	125704802	+	1.04443e-06	0.0014416	-59.0909
chr1	125928048	125928048	+	9.99414e-09	8.53525e-05	-53.2828
chr1	127017830	127017830	+	8.6026e-06	0.00490552	52.8571
chr1	127969958	127969958	+	8.40979e-08	0.000306907	55.5233
chr1	128559896	128559896	-	3.11844e-05	0.0102107	-54.2729
chr1	128977474	128977474	-	1.87689e-07	0.000505481	50.7059
chr1	129855093	129855093	-	0.00028614	0.0336733	50.303
chr1	130826584	130826584	+	1.32889e-14	2.77796e-09	59.322
chr1	131518272	131518272	+	1.36293e-08	0.000102269	-57.6923
chr1	131599903	131599903	-	5.04092e-06	0.00363	51.4706
chr1	131768976	131768976	+	1.99449e-12	2.12968e-07	85.1852
chr1	133344355	133344355	+	3.26801e-07	0.00071679	55.5556
chr1	133452274	133452274	+	5.64391e-07	0.000993656	50.2508
chr1	133782271	133782271	+	3.1882e-10	8.93398e-06	51.2821
chr1	133913314	133913314	-	8.81726e-08	0.000315798	-57.6555
chr1	133913674	133913674	+	0.000128888	0.0220732	50.5376
chr1	133964605	133964605	+	6.843e-06	0.00431918	-55.1724
chr1	135591985	135591985	-	1.26638e-08	9.80992e-05	52.6316
chr1	135861075	135861075	+	0.000325317	0.0360081	-50.8333
chr1	135861097	135861097	+	5.47212e-05	0.0138708	-59.4286
chr1	135888426	135888426	+	3.77702e-07	0.000782401	60
chr1	135889832	135889832	-	6.80751e-05	0.015627	-50.9284
chr1	136536129	136536129	+	1.34823e-08	0.000101577	-67
chr1	136691547	136691547	+	1.97352e-07	0.000522033	-53.5496
chr1	136700557	136700557	-	5.82926e-07	0.00101452	-52.2883
chr1	137169283	137169283	-	1.42459e-07	0.000426465	57.5758
chr1	137845685	137845685	+	2.443e-08	0.000145859	-57.5758
chr1	138582263	138582263	+	6.01834e-08	0.000252544	57.6923
chr1	139231752	139231752	+	1.92076e-07	0.000513382	53.0612
chr1	142345785	142345785	+	3.36576e-06	0.00287412	50.4769
chr1	142854985	142854985	-	1.27865e-06	0.00162094	51.0163
chr1	143081050	143081050	-	8.774e-09	7.91159e-05	-67.7419
chr1	143176599	143176599	-	2.21116e-07	0.00056101	63.8009
chr1	143276544	143276544	-	3.33097e-05	0.0105851	-50.9153
chr1	145536267	145536267	+	1.23757e-05	0.00603956	54.5455
chr1	150589764	150589764	+	5.06936e-09	5.6561e-05	64.2857
chr1	151277738	151277738	+	4.58159e-12	4.19756e-07	-68.75
chr1	151881901	151881901	-	9.93217e-08	0.000340685	-73.0769
chr1	151943875	151943875	+	2.1409e-09	3.19994e-05	57.5758
chr1	152568556	152568556	-	3.03748e-10	8.62001e-06	-58.3333
chr1	152626711	152626711	-	2.61917e-08	0.000152208	61.5385
chr1	153418980	153418980	+	1.48976e-05	0.0067193	51.6475
chr1	153709405	153709405	+	9.53539e-07	0.00136489	-56.3492
chr1	154152201	154152201	-	7.80828e-06	0.0046362	-57.9545
chr1	154468720	154468720	-	2.57826e-06	0.00247186	-59.0909
chr1	154567571	154567571	-	9.77626e-06	0.0052856	-56.6667
chr1	155045533	155045533	+	8.90975e-07	0.00131266	-51.8519
chr1	155529523	155529523	-	4.31503e-06	0.00332147	54.8549
chr1	156814282	156814282	+	1.73643e-08	0.000119736	-56.5217
chr1	156906372	156906372	+	1.14346e-06	0.00152344	57.6044
chr1	157852502	157852502	+	3.4229e-08	0.000180025	56.4103
chr1	158603165	158603165	-	6.86732e-08	0.000272688	-64
chr1	159394745	159394745	+	1.0078e-11	8.04187e-07	88.0785
chr1	159571012	159571012	-	0.000101031	0.0193537	-57.913
chr1	159860196	159860196	-	9.26788e-07	0.00134528	53.125
chr1	160935268	160935268	+	4.58357e-07	0.000877805	-55.6763
chr1	161004250	161004250	-	2.60679e-06	0.00248298	-51.8519
chr1	161064395	161064395	-	0.000489551	0.0445681	51.6667
chr1	162379863	162379863	-	1.20777e-06	0.00157051	52.1739
chr1	163398888	163398888	+	2.49885e-06	0.00242612	53.8539
chr1	165134091	165134091	+	1.38865e-11	9.95678e-07	78.8177
chr1	165969124	165969124	-	3.74013e-08	0.000188514	62.069
chr1	166268787	166268787	+	4.09817e-08	0.000198841	54.2129
chr1	166815359	166815359	+	2.73133e-05	0.00948828	51.2121
chr1	167572672	167572672	+	7.30121e-08	0.000281908	-55.6255
chr1	167625304	167625304	-	1.53932e-08	0.000110906	58.6207
chr1	167770197	167770197	-	2.04544e-07	0.000533639	-55.6655
chr1	168065423	168065423	-	2.7287e-06	0.00254795	50.3947
chr1	168099046	168099046	-	1.99603e-05	0.0079512	50.6494
chr1	168416715	168416715	+	1.37706e-05	0.00642213	51.6667
chr1	168453846	168453846	+	3.09871e-07	0.00069421	-63.0952
chr1	168800811	168800811	+	6.35042e-07	0.00107137	-51.7241
chr1	169461822	169461822	-	1.95365e-05	0.00784509	-51.3458
chr1	169811346	169811346	+	6.36143e-12	5.58681e-07	-54.717
chr1	169984329	169984329	+	7.88098e-07	0.00122241	55.5556
chr1	171254184	171254184	-	2.9309e-05	0.00986719	-52
chr1	171355178	171355178	-	7.26224e-07	0.00116465	-53.8462
chr1	173611498	173611498	+	2.37017e-06	0.00235118	-57.265
chr1	174660087	174660087	-	2.70225e-05	0.00943052	-59.2593
chr1	174751297	174751297	+	2.79674e-08	0.000158615	60.7204
chr1	175492033	175492033	+	7.18653e-07	0.00115674	-58.3992
chr1	175933743	175933743	+	1.29741e-07	0.000401926	-51.8519
chr1	177333773	177333773	-	4.96498e-07	0.000920791	58.944
chr1	178306466	178306466	-	2.62831e-06	0.00249594	-61.5741
chr1	179013780	179013780	-	3.98515e-09	4.85218e-05	55.7692
chr1	179906643	179906643	+	1.02201e-05	0.00542206	-57.1429
chr1	180385823	180385823	+	2.91428e-10	8.48766e-06	55.2033
chr1	182255800	182255800	-	9.46457e-08	0.000330839	-57.5758
chr1	182368970	182368970	-	2.51978e-06	0.00243974	56
chr1	184088977	184088977	-	1.98033e-08	0.000129997	-55.2632
chr1	184181435	184181435	-	1.19736e-09	2.1796e-05	51.4286
chr1	184262287	184262287	+	7.32225e-08	0.0002825	69.2308
chr1	184603367	184603367	-	0.000107011	0.0199752	-53.0303
chr1	184860124	184860124	-	1.05404e-07	0.000353541	58.5968
chr1	185345469	185345469	-	1.68726e-07	0.000472945	-57.1429
chr1	186139655	186139655	-	2.02379e-05	0.00801571	-55
chr1	186533859	186533859	-	2.4644e-07	0.000600014	-55.5556
chr1	187373573	187373573	-	3.37205e-06	0.00287831	-55.8076
chr1	187475797	187475797	-	4.47887e-06	0.00339232	55.4252
chr1	188032678	188032678	+	2.17871e-06	0.00223467	60.303
chr1	188040562	188040562	-	0.000125525	0.0217642	53.3844
chr1	188224991	188224991	+	2.06864e-08	0.000133144	73.9316
chr1	188228754	188228754	-	2.0391e-06	0.00214369	-53.5714
chr1	188666862	188666862	-	2.54533e-06	0.00245496	-61.0837
chr1	188712824	188712824	-	3.26731e-09	4.26507e-05	-56.6506
chr1	188726754	188726754	+	1.16839e-05	0.00584512	52.8708
chr1	188813064	188813064	-	8.51684e-06	0.00487815	52.1739
chr1	189632802	189632802	+	2.31386e-05	0.00863703	-51.4423
chr1	189699301	189699301	+	7.66276e-08	0.000289915	66.1765
chr1	189837191	189837191	+	2.86194e-05	0.00974292	-56.8182
chr1	190495732	190495732	+	1.42337e-07	0.000426465	-55.5556
chr1	191955169	191955169	+	7.95424e-06	0.00468712	51.3514
chr1	192181055	192181055	-	4.71494e-05	0.0127969	51.33
chr1	192266271	192266271	-	2.75295e-05	0.00952874	54.803
chr1	192624799	192624799	+	9.64338e-06	0.00524239	55
chr1	193301512	193301512	-	2.18452e-07	0.000557478	65
chr1	193515519	193515519	+	2.82899e-06	0.00259891	50.155
chr1	193668395	193668395	-	0.00013729	0.0228508	52.4615
chr1	193895733	193895733	+	2.94781e-06	0.00266584	-52.381
chr1	194489872	194489872	-	1.91254e-07	0.000512423	53.3088
chr10	3825813	3825813	-	2.96284e-07	0.000673617	54.7736
chr10	5139364	5139364	+	2.97584e-06	0.00267943	53.8462
chr10	5168612	5168612	-	3.75155e-07	0.000778973	-54.3042
chr10	5533875	5533875	+	1.75206e-06	0.00196214	54
chr10	5848705	5848705	-	4.92743e-08	0.000222471	-55.8385
chr10	6763164	6763164	+	4.98488e-06	0.00360381	55.6174
chr10	7163093	7163093	-	6.65051e-05	0.0154233	51.1724
chr10	7418509	7418509	-	1.27564e-06	0.00161808	65.812
chr10	8210986	8210986	-	1.90597e-07	0.000511179	-55.219
chr10	9588130	9588130	-	6.81779e-12	5.91756e-07	73.3333
chr10	11863269	11863269	+	1.74822e-07	0.000484262	-51.7241
chr10	12080863	12080863	-	9.69808e-06	0.00525874	51.6129
chr10	13550737	13550737	+	1.46416e-09	2.49917e-05	51.1111
chr10	13816105	13816105	+	2.77493e-06	0.002571	51.8084
chr10	16250270	16250270	+	1.85418e-06	0.00202665	56
chr10	16704217	16704217	-	2.0475e-05	0.00807175	50.5541
chr10	17001141	17001141	-	5.32659e-06	0.0037392	-54.5455
chr10	18872713	18872713	-	1.01143e-05	0.00538869	52.5641
chr10	19230283	19230283	+	2.34024e-06	0.00233366	50.4449
chr10	19559782	19559782	-	1.20219e-05	0.00593917	-53.4632
chr10	20006391	20006391	-	1.23983e-07	0.000390576	57.619
chr10	20796848	20796848	+	8.37101e-09	7.70264e-05	-55
chr10	22018789	22018789	-	6.52346e-07	0.00108923	-65.2174
chr10	23235361	23235361	-	1.99908e-07	0.000525337	55.728
chr10	24371107	24371107	-	9.27527e-07	0.0013457	51.5152
chr10	24526931	24526931	-	1.56412e-05	0.00691039	-51.5672
chr10	24644757	24644757	+	8.35255e-06	0.00482177	56.4286
chr10	25126287	25126287	-	1.02512e-06	0.00142817	61.5385
chr10	25785449	25785449	-	2.82669e-07	0.000654917	-56.5217
chr10	25876419	25876419	+	1.956e-07	0.000518878	-52.381
chr10	28665059	28665059	-	8.00593e-09	7.50158e-05	52.9412
chr10	28931836	28931836	+	1.0919e-05	0.00561622	-52
chr10	29016755	29016755	-	3.65391e-08	0.000185471	72.0159
chr10	29374839	29374839	-	3.18335e-05	0.0103353	-50.2525
chr10	31196531	31196531	+	2.56017e-08	0.00015025	-54.8387
chr10	31243909	31243909	-	4.69438e-08	0.000215111	57.1429
chr10	31741769	31741769	+	1.58888e-12	1.75987e-07	-51.0714
chr10	32753325	32753325	+	1.06182e-06	0.00145667	-57.6389
chr10	34052871	34052871	-	1.08389e-07	0.000358225	-53.8462
chr10	34173643	34173643	+	2.80138e-07	0.000651088	-57.8853
chr10	35831131	35831131	+	7.96534e-09	7.47517e-05	59.5238
chr10	36054212	36054212	-	2.57719e-08	0.000150951	-61.619
chr10	37082353	37082353	+	2.26033e-10	7.12273e-06	68.8235
chr10	39070772	39070772	+	6.94926e-10	1.50656e-05	-50.974
chr10	39276788	39276788	-	7.17879e-07	0.00115575	-62.6775
chr10	39750634	39750634	-	5.1749e-08	0.000228964	-63.5417
chr10	39901086	39901086	+	1.41387e-07	0.000425226	-51.1494
chr10	40219709	40219709	-	5.24541e-09	5.7541e-05	59.681
chr10	40658231	40658231	-	1.2291e-05	0.00601464	51.3645
chr10	41196783	41196783	-	1.25512e-06	0.00160786	53.8462
chr10	41249790	41249790	-	1.57344e-09	2.60216e-05	-74.1935
chr10	41833548	41833548	+	2.6642e-06	0.00251425	-54.2857
chr10	42043765	42043765	+	1.91933e-07	0.000513186	-58.3744
chr10	42180371	42180371	-	1.80778e-07	0.00049481	-58.4396
chr10	42249136	42249136	-	0.000109007	0.0201874	53.129
chr10	43284845	43284845	-	2.40457e-12	2.4784e-07	-87.5
chr10	43573055	43573055	-	3.09156e-06	0.00273443	53.9898
chr10	43642795	43642795	-	6.30419e-08	0.000259333	-72.1538
chr10	43843979	43843979	-	3.71984e-07	0.000774989	57.8348
chr10	43927028	43927028	-	1.01228e-07	0.000345149	53.3626
chr10	44359042	44359042	-	4.06432e-09	4.89635e-05	53.4884
chr10	44399658	44399658	+	1.797e-06	0.00198847	-56.3131
chr10	44675728	44675728	+	1.84558e-07	0.000501508	51.3514
chr10	45027006	45027006	+	6.13205e-05	0.0147655	54.5455
chr10	46109688	46109688	+	1.1649e-08	9.34654e-05	75
chr10	46294397	46294397	-	2.65649e-08	0.000153722	62.9712
chr10	46399053	46399053	+	4.54307e-07	0.000872187	52.5
chr10	47580973	47580973	+	6.53748e-08	0.00026482	-68.7783
chr10	48319146	48319146	-	1.46024e-07	0.000433193	52.7778
chr10	48643171	48643171	-	1.08225e-05	0.00558957	60.7744
chr10	50434353	50434353	+	6.98103e-13	9.00985e-08	-69.697
chr10	52861477	52861477	-	3.8811e-05	0.0115109	-52.0833
chr10	53095826	53095826	+	1.35961e-05	0.00637121	50.3456
chr10	53676120	53676120	+	1.0919e-05	0.00561622	52
chr10	53699038	53699038	-	1.40573e-08	0.000104372	56.4744
chr10	53777470	53777470	+	4.80913e-05	0.0129451	57.1429
chr10	55707328	55707328	-	1.74409e-09	2.77152e-05	-68.0653
chr10	55913738	55913738	-	3.37224e-08	0.00017901	61.561
chr10	56401111	56401111	-	7.3652e-09	7.11317e-05	-79.1667
chr10	56758382	56758382	+	6.13205e-05	0.0147655	54.5455
chr10	57349687	57349687	-	5.14848e-15	1.14051e-09	-75.8621
chr10	58380633	58380633	+	1.19491e-05	0.00592076	-54.1209
chr10	58623785	58623785	-	2.58507e-06	0.00247457	56.8627
chr10	58712388	58712388	-	3.84735e-11	1.97588e-06	-58.4034
chr10	59801798	59801798	+	4.75361e-07	0.000897341	-57.6923
chr10	59824894	59824894	-	3.70037e-07	0.000772452	-60.9626
chr10	60266571	60266571	+	8.22022e-07	0.00125224	53.4632
chr10	61302285	61302285	-	2.41251e-07	0.000591715	50.9906
chr10	61939207	61939207	+	9.38504e-07	0.00135513	53.5714
chr10	62022649	62022649	-	5.14844e-12	4.63114e-07	-64.5833
chr10	62126237	62126237	+	5.8628e-11	2.66618e-06	61.4943
chr10	63230941	63230941	-	4.01738e-06	0.00319148	55.5556
chr10	63710176	63710176	-	2.11361e-11	1.29097e-06	-59.6591
chr10	64355882	64355882	-	1.55855e-11	1.04671e-06	-72.4912
chr10	64615928	64615928	+	7.00579e-06	0.00437888	-51.0417
chr10	66130147	66130147	+	1.24997e-05	0.0060747	-50.2646
chr10	66132793	66132793	-	3.71387e-14	7.25286e-09	59.1837
chr10	66219665	66219665	+	1.34675e-05	0.00633991	54.8387
chr10	66519907	66519907	+	1.18226e-07	0.000378788	56.6667
chr10	66623877	66623877	+	1.60798e-07	0.000460997	54.2276
chr10	67533043	67533043	+	7.96243e-07	0.00122745	59.8851
chr10	67733163	67733163	+	8.13258e-06	0.00474972	-58.3333
chr10	68570399	68570399	-	2.29226e-09	3.34274e-05	-56.0264
chr10	69124642	69124642	-	4.39123e-05	0.012307	-50.1176
chr10	69445235	69445235	+	2.6941e-09	3.71223e-05	-64.9444
chr10	69445335	69445335	+	1.72919e-05	0.00732213	55.0272
chr10	69637848	69637848	+	4.2247e-06	0.00328084	54.8387
chr10	69650932	69650932	-	1.36594e-09	2.39639e-05	-57.3016
chr10	70799007	70799007	-	5.98015e-10	1.34482e-05	57.8947
chr10	72469504	72469504	-	1.19941e-06	0.00156349	-65.3846
chr10	72596597	72596597	+	9.64763e-08	0.000334403	-53.4433
chr10	74021497	74021497	+	2.62973e-07	0.000624393	-52.9246
chr10	74644181	74644181	+	7.55645e-06	0.00456002	-52.9412
chr10	75675475	75675475	+	5.48303e-05	0.0138858	50.2222
chr10	75900938	75900938	+	7.69177e-10	1.62709e-05	-60.9524
chr10	75978928	75978928	+	1.32647e-06	0.0016607	51.0073
chr10	76646820	76646820	+	1.77365e-10	6.02397e-06	57.1569
chr10	77191664	77191664	-	3.14006e-11	1.71342e-06	-76.1905
chr10	77668589	77668589	-	3.16685e-07	0.000702655	-52
chr10	78001423	78001423	+	2.681e-09	3.705e-05	-54.2857
chr10	78585695	78585695	+	5.77233e-05	0.0142775	52.9762
chr10	79093668	79093668	+	5.29017e-08	0.000232403	54
chr10	79498276	79498276	+	3.41666e-07	0.000736702	59.9284
chr10	80090697	80090697	-	2.21075e-06	0.00225868	-51.7949
chr10	80440832	80440832	+	6.33447e-08	0.000259873	-60.6061
chr10	81534786	81534786	+	1.1223e-05	0.00570962	52.1053
chr10	82350606	82350606	+	5.53601e-07	0.000983671	-54.8023
chr10	83047917	83047917	+	3.2319e-08	0.000174644	-53.8462
chr10	83305572	83305572	-	1.6343e-07	0.000465755	61.7647
chr10	83932658	83932658	+	9.84592e-07	0.00139335	50.3771
chr10	83997944	83997944	+	7.74914e-07	0.0012108	61.9048
chr10	84024563	84024563	-	2.38794e-08	0.000144191	51.8519
chr10	84350385	84350385	+	1.32155e-07	0.000407026	55.1854
chr10	84418318	84418318	+	5.6253e-06	0.00386141	57.1429
chr10	84583638	84583638	+	5.92551e-05	0.0144708	51.6129
chr10	84868756	84868756	-	1.74822e-07	0.000484262	-51.7241
chr10	84953372	84953372	-	3.50827e-06	0.00294514	-62.125
chr10	85519596	85519596	+	1.76962e-06	0.00197008	-51.2605
chr10	87747823	87747823	-	2.10874e-06	0.00219037	-56.5341
chr10	88345261	88345261	-	2.24842e-05	0.00849705	56.5217
chr10	89342989	89342989	-	3.98514e-05	0.0116855	-54.963
chr10	89570338	89570338	+	3.44812e-06	0.00291505	-56
chr10	90297571	90297571	+	0.00010503	0.0197553	53.25
chr10	90723117	90723117	-	4.84149e-08	0.000220443	61.5385
chr10	91035217	91035217	+	1.80164e-06	0.00198948	-56.5217
chr10	91498487	91498487	+	1.57119e-08	0.000112136	-53.8131
chr10	92176750	92176750	-	1.25395e-06	0.00160733	-56.6667
chr10	93239290	93239290	+	3.4478e-08	0.000180587	54.2857
chr10	93305138	93305138	-	4.2683e-07	0.00084193	65.625
chr10	93465024	93465024	-	1.28979e-08	9.87676e-05	57.5758
chr10	93857202	93857202	-	1.23865e-08	9.67509e-05	51.1628
chr10	95145188	95145188	+	5.21823e-06	0.00370006	50.4762
chr10	95927077	95927077	+	8.04457e-08	0.000299319	62.5
chr10	96143350	96143350	-	2.58652e-07	0.000618686	-57.9861
chr10	96178892	96178892	+	3.88057e-06	0.00313026	60.2151
chr10	96223519	96223519	+	2.84753e-14	5.71126e-09	-75.4872
chr10	96383607	96383607	-	2.12405e-06	0.0021995	-52
chr10	98983547	98983547	-	1.07184e-07	0.000356851	-55.3247
chr10	99655901	99655901	+	1.54174e-05	0.00684968	55.2439
chr10	99927588	99927588	-	1.82485e-07	0.00049724	-54.2857
chr10	100042156	100042156	-	9.69562e-06	0.00525849	55.653
chr10	102241177	102241177	+	6.92559e-11	3.0308e-06	56.8627
chr10	103741101	103741101	+	8.95086e-09	7.96939e-05	53.9308
chr10	103992524	103992524	-	3.86393e-08	0.000192124	-51.8519
chr10	104400553	104400553	-	8.78771e-07	0.00130298	-54.0541
chr10	105260286	105260286	+	8.69198e-06	0.00493558	52.1786
chr10	105376800	105376800	-	2.92266e-05	0.00985114	51.1438
chr10	107166073	107166073	-	1.15846e-05	0.00581723	-51.1241
chr10	108132838	108132838	+	9.77626e-06	0.0052856	56.6667
chr10	108891291	108891291	+	4.01764e-08	0.000196626	-56.7143
chr10	109306588	109306588	+	2.34719e-07	0.000581397	53.5714
chr10	109372894	109372894	+	6.9098e-12	5.96256e-07	-69.5567
chr10	109931668	109931668	-	0.000551332	0.0473019	-50.4658
chr10	110119501	110119501	-	1.06512e-05	0.00554085	-58.7879
chr10	111865149	111865149	-	3.87505e-07	0.000793733	53.8156
chr10	115473488	115473488	+	6.59149e-15	1.41785e-09	-95.6522
chr10	115998414	115998414	-	6.04853e-05	0.0146327	-52.7143
chr10	118819867	118819867	+	1.21725e-05	0.00598112	62.5
chr10	118832944	118832944	-	5.32399e-07	0.000960902	54.5455
chr10	119078638	119078638	+	5.68054e-09	6.07868e-05	-62.8571
chr10	119434872	119434872	-	1.91699e-06	0.00206865	-51.1218
chr10	119899640	119899640	+	1.72008e-06	0.00193994	-54.1667
chr10	120462159	120462159	+	1.7596e-06	0.0019651	-52.3153
chr10	123217633	123217633	+	0.000111876	0.0204398	56
chr10	123369670	123369670	+	6.94966e-05	0.0157946	52.1739
chr10	125683622	125683622	+	6.30419e-08	0.000259333	73.0769
chr10	125831332	125831332	-	3.3518e-07	0.000728159	-56
chr10	126067206	126067206	+	4.01738e-06	0.00319148	-53.8462
chr10	126943893	126943893	-	6.92302e-06	0.00434673	-55.6452
chr10	127520035	127520035	+	4.92313e-05	0.0131097	51.6667
chr10	127726886	127726886	+	9.23496e-07	0.00134168	-51.6369
chr10	128145881	128145881	+	1.66188e-05	0.00715298	-54.5455
chr10	128527881	128527881	-	2.243e-07	0.000566557	51.7241
chr10	129941064	129941064	+	1.53914e-06	0.0018146	62.963
chr11	3752344	3752344	-	1.51902e-06	0.0018022	-59.0656
chr11	4420474	4420474	-	8.13258e-06	0.00474972	56.5217
chr11	4529532	4529532	-	8.89697e-06	0.00500629	50.7368
chr11	4756341	4756341	-	1.59955e-06	0.00185907	-54.1176
chr11	5183503	5183503	+	1.33447e-12	1.52356e-07	62.5
chr11	5189231	5189231	-	9.91809e-07	0.00140089	-51.7857
chr11	6695173	6695173	+	5.30796e-06	0.00373212	-67
chr11	7416744	7416744	-	1.78226e-05	0.00745454	51.9841
chr11	7570134	7570134	+	1.12737e-05	0.00572874	-51.2195
chr11	7762964	7762964	-	2.6426e-08	0.00015309	-61.3636
chr11	8680107	8680107	-	2.30852e-06	0.00231568	54.2857
chr11	8775261	8775261	+	7.38219e-07	0.00117675	54.2857
chr11	9535820	9535820	+	1.2279e-10	4.57904e-06	-61.561
chr11	9658458	9658458	-	2.37514e-05	0.0087707	58.8509
chr11	9733555	9733555	+	1.17974e-07	0.000378427	51.9401
chr11	9761428	9761428	+	3.56126e-06	0.00296997	50.2736
chr11	10238385	10238385	+	5.74438e-09	6.12217e-05	64.9589
chr11	10250943	10250943	+	6.7826e-06	0.00429986	63.6364
chr11	11250192	11250192	-	2.39338e-08	0.000144294	55.9833
chr11	11740528	11740528	+	8.23198e-08	0.000303551	-57.7003
chr11	11866905	11866905	-	3.45346e-05	0.0107835	53.125
chr11	12191580	12191580	-	5.21357e-06	0.00369787	-51.7241
chr11	12215793	12215793	+	1.62662e-06	0.00187816	53.6822
chr11	12391714	12391714	-	7.57565e-06	0.00456381	51.5152
chr11	13326036	13326036	+	4.15879e-06	0.00325297	-50.2152
chr11	13475970	13475970	-	3.3041e-08	0.000176911	55.7792
chr11	14503639	14503639	-	4.30373e-05	0.0121629	50.5445
chr11	15818814	15818814	+	3.17979e-10	8.93398e-06	-57.1429
chr11	16673730	16673730	+	2.04914e-08	0.000132578	-60
chr11	17230913	17230913	+	1.23612e-05	0.00603394	-51.8519
chr11	19241203	19241203	+	1.46017e-05	0.00664634	-51.2759
chr11	19681329	19681329	+	1.56102e-05	0.00690397	52.381
chr11	20314086	20314086	+	7.72538e-07	0.0012083	-52.6667
chr11	22615231	22615231	+	2.3707e-08	0.000143735	-57.6744
chr11	22987123	22987123	+	4.83876e-07	0.000907795	-52.9412
chr11	23780665	23780665	-	2.5979e-09	3.6239e-05	57.5
chr11	23787252	23787252	-	2.62642e-08	0.000152463	64.4167
chr11	24218002	24218002	-	2.46214e-08	0.00014656	66.6964
chr11	24250544	24250544	+	5.20116e-08	0.000229751	57.6389
chr11	25259948	25259948	+	3.09407e-06	0.00273511	53.2153
chr11	25383936	25383936	+	8.20262e-07	0.00125033	53.125
chr11	25473134	25473134	+	3.4019e-09	4.38305e-05	53.8462
chr11	25994436	25994436	-	1.38321e-05	0.00643628	56.0096
chr11	26525209	26525209	-	9.09881e-09	8.06242e-05	55.5556
chr11	28067445	28067445	-	9.90192e-07	0.00139954	-56.1278
chr11	29215706	29215706	+	4.59904e-05	0.0126344	52.381
chr11	30250638	30250638	-	2.7806e-08	0.000157967	59.1667
chr11	30722235	30722235	-	7.10115e-06	0.00441024	53.096
chr11	31004695	31004695	-	2.13466e-08	0.000135554	51.4286
chr11	31138169	31138169	+	0.000133024	0.0224417	-54.5161
chr11	31239186	31239186	-	2.50234e-09	3.54015e-05	62.963
chr11	31377396	31377396	+	2.28586e-07	0.000571472	-50.1815
chr11	31400460	31400460	-	9.1645e-05	0.0183482	-55
chr11	31461952	31461952	-	2.25295e-07	0.000567331	51.3514
chr11	31649895	31649895	-	4.23838e-09	5.05315e-05	65.6995
chr11	31854351	31854351	+	5.28267e-05	0.0136296	50.6667
chr11	31863142	31863142	+	6.00342e-05	0.0145732	50.4762
chr11	31999664	31999664	-	4.77882e-10	1.16275e-05	71.6403
chr11	32063656	32063656	-	4.97913e-08	0.000223874	69.5652
chr11	32064488	32064488	-	1.06198e-05	0.00553268	52.7568
chr11	32384579	32384579	-	1.70408e-09	2.71958e-05	71.2169
chr11	32549265	32549265	-	1.35512e-09	2.38587e-05	60.3774
chr11	32978840	32978840	+	1.95476e-05	0.00784654	51.6317
chr11	33309764	33309764	+	6.19714e-05	0.0148696	-57.0707
chr11	33399748	33399748	+	0.000166373	0.0253303	56.0897
chr11	33584869	33584869	+	1.63601e-05	0.00708711	53.8462
chr11	33840925	33840925	+	1.53799e-08	0.000110906	51.3978
chr11	33973126	33973126	-	3.94184e-06	0.00315606	52.1739
chr11	34108275	34108275	-	6.01583e-06	0.00401974	-61.118
chr11	34143189	34143189	-	3.10564e-06	0.00273946	-51.7477
chr11	34211207	34211207	+	1.88862e-08	0.000126209	63.5249
chr11	34226656	34226656	-	3.41986e-08	0.000180025	71.4286
chr11	34498644	34498644	-	7.252e-06	0.00446757	50.8374
chr11	35894005	35894005	-	1.73851e-08	0.000119767	63.3784
chr11	35992509	35992509	+	2.637e-06	0.00249976	52.0773
chr11	36056638	36056638	+	3.94184e-06	0.00315606	-52.1739
chr11	36210627	36210627	-	1.6746e-07	0.000471009	54.961
chr11	37384067	37384067	-	3.66399e-12	3.53126e-07	-71.9212
chr11	37564452	37564452	-	2.54285e-12	2.56744e-07	57.1429
chr11	38156800	38156800	-	2.59716e-06	0.00248148	58.0808
chr11	39513706	39513706	-	2.08594e-07	0.000540688	-52.3077
chr11	39614084	39614084	+	5.46705e-07	0.000975628	-55.4348
chr11	39804945	39804945	-	1.36293e-08	0.000102269	-57.6923
chr11	40484305	40484305	+	9.85311e-08	0.000339306	63.6364
chr11	41205434	41205434	-	1.34048e-05	0.00632371	52.7778
chr11	41649377	41649377	+	0.000226205	0.0298148	-51.9763
chr11	41756373	41756373	+	2.16904e-06	0.00222836	-55.8824
chr11	43303740	43303740	+	7.44603e-08	0.000285397	-51.5206
chr11	43344478	43344478	-	0.00017412	0.0259289	50.6667
chr11	43834727	43834727	-	0.00010374	0.0196426	55.9934
chr11	44008720	44008720	+	3.70431e-10	9.77558e-06	58.6473
chr11	44121255	44121255	+	5.11856e-08	0.000227592	-59.2857
chr11	44483415	44483415	-	5.74354e-09	6.12217e-05	50.7847
chr11	44826035	44826035	+	2.50952e-09	3.54055e-05	-66.2393
chr11	44834521	44834521	+	2.73133e-05	0.00948828	-51.2121
chr11	45192680	45192680	-	0.000159144	0.0247298	54.2208
chr11	45513143	45513143	+	7.76452e-06	0.00462283	58.7963
chr11	46468793	46468793	-	4.59866e-07	0.000879202	57.7381
chr11	47325681	47325681	+	0.000137867	0.0228906	53.1773
chr11	47366334	47366334	+	4.9781e-09	5.58892e-05	-58.0645
chr11	49282819	49282819	+	1.61326e-06	0.00186786	60.4106
chr11	50655391	50655391	-	8.56842e-06	0.00489373	-58.2418
chr11	50683523	50683523	-	8.16741e-07	0.00124675	-57.8431
chr11	51425498	51425498	+	3.98788e-07	0.000806764	51.5873
chr11	52058805	52058805	-	1.69744e-06	0.0019253	-53.5714
chr11	52123028	52123028	+	5.72657e-08	0.000245011	-58.0645
chr11	52578997	52578997	-	3.52664e-06	0.00295483	55
chr11	52677084	52677084	-	3.17162e-07	0.000702835	62.1588
chr11	52878559	52878559	+	1.66551e-08	0.000116089	60
chr11	53126766	53126766	+	1.52489e-09	2.5608e-05	59.2593
chr11	53197554	53197554	+	4.14618e-06	0.00324852	51.5152
chr11	54174460	54174460	-	2.75852e-08	0.000157289	-53.3333
chr11	54273110	54273110	-	1.34624e-08	0.000101488	60.7143
chr11	55994290	55994290	-	2.54419e-06	0.0024549	57.8947
chr11	56030652	56030652	+	0.000110951	0.0203866	58.3333
chr11	56120620	56120620	-	3.88267e-08	0.000192797	-63.8095
chr11	56314867	56314867	+	3.74003e-07	0.00077745	-51.7241
chr11	57398169	57398169	+	7.55681e-09	7.22479e-05	57.1429
chr11	57494755	57494755	-	3.37496e-07	0.000732011	52.6316
chr11	57687999	57687999	-	5.89554e-05	0.0144307	-50.6641
chr11	58216070	58216070	-	1.15807e-06	0.00153137	54.5455
chr11	58289259	58289259	+	3.35295e-08	0.000178368	60.6061
chr11	58644106	58644106	-	2.76781e-05	0.00955753	57.3846
chr11	58720900	58720900	-	9.68468e-08	0.000335061	64
chr11	59545104	59545104	+	1.67473e-07	0.000471009	-53.0612
chr11	59638723	59638723	+	1.81176e-05	0.00752324	-53.6364
chr11	59802343	59802343	-	3.80461e-07	0.000785714	-57.1429
chr11	60311584	60311584	+	4.38908e-08	0.000207786	-57.037
chr11	60715444	60715444	-	3.24965e-07	0.000715285	-55.5233
chr11	60869274	60869274	+	8.53645e-09	7.80112e-05	-67.5132
chr11	61010231	61010231	-	1.59736e-05	0.00699274	-51.4368
chr11	61545321	61545321	-	7.83322e-07	0.00121851	-59.0909
chr11	62003018	62003018	+	2.58315e-07	0.000618478	-53.8462
chr11	62103219	62103219	-	4.38041e-05	0.0122891	-59.5318
chr11	62264752	62264752	-	2.74693e-07	0.000642433	60
chr11	62692554	62692554	+	8.16045e-06	0.00476038	57.5269
chr11	62720019	62720019	-	5.79615e-07	0.00101054	54.5455
chr11	62995637	62995637	+	1.61399e-06	0.00186842	52.0579
chr11	63164166	63164166	-	6.47979e-10	1.42269e-05	-51.2821
chr11	64039782	64039782	+	1.67408e-08	0.000116488	-58.1395
chr11	64187194	64187194	+	1.91788e-07	0.00051308	51.2899
chr11	64798686	64798686	+	3.44609e-05	0.0107785	58.8333
chr11	65075104	65075104	+	8.00469e-07	0.00122963	52.7778
chr11	67013617	67013617	-	1.45977e-08	0.000107417	51.0484
chr11	67074764	67074764	+	2.297e-06	0.00230856	52.7778
chr11	67097143	67097143	-	1.51489e-06	0.00179903	55.2632
chr11	67182051	67182051	-	0.000108321	0.0201173	51.3333
chr11	67350626	67350626	+	1.40805e-07	0.00042442	57.5676
chr11	68229117	68229117	-	4.41492e-07	0.000858124	-52.7273
chr11	68647286	68647286	+	3.4523e-07	0.00074099	54.5455
chr11	68788094	68788094	-	2.58471e-05	0.00919141	52.2321
chr11	68991887	68991887	-	7.26224e-07	0.00116465	53.8462
chr11	69153624	69153624	+	3.7267e-09	4.66112e-05	57.654
chr11	70776690	70776690	+	8.45737e-10	1.71483e-05	52.7273
chr11	70975887	70975887	-	1.02854e-06	0.00143089	55.303
chr11	71415170	71415170	+	3.64654e-05	0.0111121	50.2747
chr11	72408114	72408114	-	6.05645e-06	0.00402465	-50.4762
chr11	72431860	72431860	-	1.08966e-05	0.00561117	54.2424
chr11	72528785	72528785	+	5.56771e-07	0.000985605	-53.8462
chr11	72703292	72703292	-	9.5216e-07	0.0013643	53.8462
chr11	74281151	74281151	+	3.81135e-08	0.000190772	61.6176
chr11	74381596	74381596	+	1.50025e-08	0.000109525	54.8387
chr11	74837785	74837785	-	2.37233e-06	0.00235269	54.662
chr11	75156783	75156783	+	1.62189e-09	2.6424e-05	59.375
chr11	75257676	75257676	-	8.51684e-06	0.00487815	52.1739
chr11	76065945	76065945	-	4.49647e-06	0.00340101	-55
chr11	76301502	76301502	+	7.55398e-06	0.00455927	57.1429
chr11	76355215	76355215	-	3.39029e-08	0.000179391	-58.8235
chr11	76668076	76668076	-	1.2357e-06	0.00159384	56.6234
chr11	76705612	76705612	+	1.16651e-06	0.00153772	-52.3232
chr11	76748663	76748663	+	8.78791e-10	1.7602e-05	-76.69
chr11	77802997	77802997	-	2.04914e-08	0.000132578	-60
chr11	78737278	78737278	-	5.27843e-06	0.00372282	54.0172
chr11	78743551	78743551	+	1.37072e-07	0.000416211	-55.8333
chr11	78931900	78931900	-	5.49211e-06	0.00380535	-56.0952
chr11	79057984	79057984	+	4.30091e-08	0.000205443	-57.4468
chr11	79397394	79397394	+	8.42297e-09	7.74084e-05	56
chr11	79792420	79792420	+	1.87006e-07	0.000505082	60
chr11	79840595	79840595	+	1.39478e-09	2.42406e-05	-62.5
chr11	80141264	80141264	+	4.69758e-07	0.000891244	58.5586
chr11	80167885	80167885	-	2.56552e-06	0.00246553	-53.4553
chr11	80567872	80567872	-	1.06652e-05	0.00554118	52.9454
chr11	80889849	80889849	-	3.37496e-07	0.000732011	52.6316
chr11	80947489	80947489	+	3.79509e-06	0.00308497	63.7181
chr11	81201438	81201438	-	9.45769e-05	0.0186662	51.0395
chr11	81447296	81447296	-	9.45822e-06	0.00518443	-51.3935
chr11	81633838	81633838	-	9.58138e-07	0.00136949	59.7619
chr11	81783021	81783021	+	6.53638e-06	0.00420626	56.7829
chr11	81795099	81795099	+	1.52019e-08	0.000110278	56.6667
chr11	82366005	82366005	+	8.69703e-09	7.88048e-05	-54.4268
chr11	82755848	82755848	-	5.32016e-07	0.000960902	-53.3333
chr11	84243340	84243340	+	6.70439e-09	6.70083e-05	55.5556
chr11	84291464	84291464	+	7.63932e-10	1.62441e-05	62.8894
chr11	85633228	85633228	-	9.07624e-08	0.000322043	53.4884
chr11	85690982	85690982	+	3.39888e-07	0.00073409	-50.2313
chr11	85700205	85700205	-	2.25598e-07	0.000567805	-60
chr11	85734942	85734942	-	4.86204e-07	0.000909786	-51.7241
chr11	85944750	85944750	+	6.99548e-16	1.95901e-10	-68.1818
chr11	85962223	85962223	+	2.46726e-07	0.000600612	63.3333
chr11	86062039	86062039	-	1.09359e-05	0.0056222	56
chr11	86170021	86170021	+	1.08038e-05	0.00558511	53.3333
chr11	86274112	86274112	+	2.42953e-08	0.000145284	65.8621
chr11	86591529	86591529	+	4.56239e-09	5.27879e-05	-58.1356
chr11	86715256	86715256	+	3.97088e-07	0.000804701	61.0599
chr11	86722831	86722831	-	1.38588e-05	0.0064431	51.8519
chr11	86941157	86941157	-	2.31246e-10	7.19536e-06	73.5294
chr11	86974975	86974975	-	4.01738e-06	0.00319148	-55.5556
chr11	87205979	87205979	+	1.65027e-07	0.000467311	51.3514
chr11	87329478	87329478	+	9.17449e-08	0.000324598	55.5556
chr11	87679932	87679932	+	5.09958e-06	0.00365204	-52.5
chr11	88173934	88173934	+	4.37718e-06	0.00335	-64.3519
chr11	88548274	88548274	-	0.000121398	0.0213727	51.8519
chr11	88603525	88603525	+	2.21355e-05	0.00841779	53.8829
chr11	88638804	88638804	-	1.77438e-05	0.00743254	57.1659
chr11	89140809	89140809	-	8.51684e-06	0.00487815	52.1739
chr11	89885225	89885225	-	3.69781e-05	0.0111916	-54.1667
chr11	90262761	90262761	-	4.90918e-06	0.00357533	-60.1852
chr11	90629566	90629566	-	1.28057e-07	0.000398455	59.2857
chr11	90723397	90723397	+	5.97278e-06	0.00400509	60
chr11	90809932	90809932	-	6.58503e-06	0.00422477	-61.0368
chr11	92035392	92035392	+	3.12741e-06	0.00275032	52.5
chr11	93310647	93310647	+	4.74338e-07	0.00089604	-52.381
chr11	93973555	93973555	+	3.38794e-07	0.000733632	58.0645
chr11	94507768	94507768	+	3.06726e-07	0.000690691	-50.3374
chr11	94925125	94925125	+	5.21489e-06	0.00369822	57.6923
chr11	96227843	96227843	-	2.28038e-08	0.000140322	-52.6316
chr11	96508303	96508303	+	1.55923e-05	0.00689885	51.8173
chr11	97034855	97034855	+	1.50475e-05	0.00676411	-51.5152
chr11	97934052	97934052	+	9.78066e-09	8.42517e-05	54.5455
chr11	98687673	98687673	-	4.31058e-06	0.00332147	55.5556
chr11	98830081	98830081	-	1.25512e-06	0.00160786	53.8462
chr11	99047251	99047251	-	9.52207e-07	0.0013643	52.8049
chr11	99401747	99401747	+	2.56645e-10	7.72647e-06	50.1989
chr11	99668757	99668757	+	2.58764e-05	0.00919803	-54.1667
chr11	99847992	99847992	+	0.000433478	0.0418926	52.1978
chr11	100021959	100021959	+	1.2198e-09	2.20786e-05	-57.5758
chr11	100236703	100236703	+	2.23311e-06	0.00227025	54.4397
chr11	101301473	101301473	-	1.23388e-06	0.00159288	62.619
chr11	101460355	101460355	-	2.70793e-05	0.00944216	57.6726
chr11	101517718	101517718	+	5.98331e-06	0.00400851	53.0564
chr11	101632357	101632357	-	2.37017e-06	0.00235118	57.265
chr11	102291119	102291119	-	6.33475e-06	0.00413316	51.2963
chr11	102596656	102596656	-	1.15763e-09	2.13205e-05	-65.5172
chr11	102833830	102833830	+	4.45806e-09	5.22457e-05	65.359
chr11	103796799	103796799	-	2.94965e-09	3.9552e-05	52.9412
chr11	103825392	103825392	+	1.7459e-05	0.00737194	58.1197
chr11	104001726	104001726	-	1.26582e-06	0.00161428	-62.5
chr11	104051749	104051749	-	2.62144e-05	0.00926285	-54.1111
chr11	104185584	104185584	+	0.000116867	0.0209599	52.3142
chr11	104573036	104573036	+	3.48289e-06	0.002932	-51.5385
chr11	104772473	104772473	-	2.76065e-08	0.00015735	-54.9409
chr11	105384227	105384227	+	4.57363e-05	0.0126063	50.1425
chr11	106702045	106702045	-	7.17062e-07	0.00115556	50.0574
chr11	107691272	107691272	+	1.38426e-05	0.00643935	-53.125
chr11	107758450	107758450	-	6.11893e-11	2.75205e-06	-68
chr11	108428500	108428500	-	4.84815e-05	0.0130006	51.861
chr11	108890014	108890014	+	8.85056e-07	0.00130864	60.7826
chr11	111124631	111124631	+	1.26485e-07	0.000395351	-60.1902
chr11	111999007	111999007	-	2.4276e-05	0.00887717	52.5517
chr11	112409852	112409852	-	1.67345e-06	0.00190984	57.0946
chr11	112510284	112510284	+	1.44728e-05	0.00661082	58.0745
chr11	112595616	112595616	+	4.43113e-08	0.000208799	-51.4399
chr11	112595635	112595635	-	1.53914e-06	0.0018146	62.963
chr11	112840976	112840976	+	4.17212e-08	0.00020116	53.125
chr11	113639369	113639369	+	4.22882e-08	0.000202925	-65.5172
chr11	113951160	113951160	-	7.98862e-11	3.35887e-06	-57.1429
chr11	114464863	114464863	-	1.69878e-06	0.00192538	-54.7519
chr11	116102000	116102000	+	1.90576e-05	0.00773483	51.2311
chr11	116256198	116256198	+	5.37417e-07	0.000965199	50.101
chr11	116292845	116292845	+	1.10176e-06	0.00148915	-57.1429
chr11	116893807	116893807	+	3.93085e-06	0.00315356	54.1667
chr11	116989043	116989043	+	3.36895e-07	0.00073135	-52.9891
chr11	117059241	117059241	-	5.11628e-06	0.00365749	-55.8528
chr11	117150856	117150856	+	1.11307e-11	8.55975e-07	-62.963
chr11	117233633	117233633	-	7.92163e-08	0.000296305	-75
chr11	117348067	117348067	-	4.99742e-08	0.000224289	53.8462
chr11	117554456	117554456	-	3.50137e-10	9.56746e-06	-63.0435
chr11	118439263	118439263	+	4.28988e-07	0.000844105	53.8462
chr11	118846004	118846004	+	1.61024e-07	0.000461304	-51.0638
chr11	119158408	119158408	-	3.20917e-06	0.00279606	54.5882
chr11	119319279	119319279	+	2.31013e-05	0.00863086	-51.4286
chr11	119333883	119333883	+	1.36377e-09	2.39639e-05	-56.7527
chr11	120421829	120421829	-	8.49431e-09	7.79194e-05	55.4924
chr11	120528760	120528760	-	1.36328e-07	0.000414714	-52.4762
chr11	120606694	120606694	-	1.08038e-05	0.00558511	53.3333
chr12	3895018	3895018	+	1.16571e-08	9.3469e-05	52
chr12	4515351	4515351	+	7.61635e-06	0.00457756	54.7059
chr12	5221795	5221795	+	3.6317e-08	0.000184596	56.4103
chr12	5782534	5782534	-	4.44125e-12	4.11985e-07	-56.9903
chr12	7034981	7034981	+	2.04823e-06	0.00215009	51.4286
chr12	7065503	7065503	-	5.78727e-06	0.00393258	55.6878
chr12	7600642	7600642	-	0.000356694	0.0378909	-50.4762
chr12	9204337	9204337	+	1.24755e-07	0.000391629	-53.8462
chr12	10600150	10600150	-	3.13723e-07	0.000700198	61.1111
chr12	11071079	11071079	-	3.35104e-06	0.00286567	54.0514
chr12	12388041	12388041	-	7.96243e-07	0.00122745	60
chr12	12575691	12575691	+	1.58885e-09	2.61441e-05	-70.3704
chr12	12807862	12807862	-	9.12296e-08	0.000323391	-51.4825
chr12	12854123	12854123	-	2.13466e-05	0.00824604	58.9286
chr12	13324347	13324347	+	3.5398e-06	0.00295939	53.125
chr12	13536476	13536476	+	1.02385e-06	0.00142727	-56
chr12	13536480	13536480	+	1.45931e-06	0.00175735	-54.1311
chr12	13645619	13645619	-	5.48342e-08	0.000238248	-54.1132
chr12	13709125	13709125	-	3.17069e-11	1.71751e-06	-65.7895
chr12	13841609	13841609	-	1.80164e-06	0.00198948	56.5217
chr12	13884779	13884779	-	9.44259e-06	0.00517879	-52.381
chr12	13987077	13987077	+	0.000118749	0.0211334	52.9101
chr12	14146769	14146769	+	9.05282e-05	0.0182266	51.4286
chr12	14307180	14307180	+	3.6696e-06	0.00302195	-56.746
chr12	14705271	14705271	-	2.2936e-07	0.000572679	-63.2184
chr12	15592925	15592925	+	1.08472e-08	8.95318e-05	54.5455
chr12	16106970	16106970	-	8.98831e-08	0.000319764	56.5011
chr12	17300327	17300327	-	3.09286e-07	0.0006938	51.7857
chr12	17656345	17656345	-	2.57263e-05	0.00917007	55.4762
chr12	18382489	18382489	+	1.31871e-06	0.00165366	55.5261
chr12	20642829	20642829	-	0.000154039	0.0242624	50.8102
chr12	24863094	24863094	+	5.15624e-08	0.000228378	-51.2195
chr12	25240019	25240019	-	2.33977e-06	0.0023335	50.4396
chr12	26083610	26083610	+	2.1058e-08	0.000134879	-58.5925
chr12	26170393	26170393	+	2.73164e-07	0.000640269	63.1336
chr12	26392308	26392308	-	7.06827e-07	0.00114516	62.8571
chr12	26558078	26558078	-	1.97756e-06	0.00210705	-51.8519
chr12	26878910	26878910	-	3.4478e-08	0.000180587	54.2857
chr12	27460500	27460500	-	1.11374e-05	0.00568022	-52.1739
chr12	27491482	27491482	-	5.57612e-08	0.000241146	50.6341
chr12	27821231	27821231	-	4.41964e-06	0.00336514	-57.5758
chr12	27848015	27848015	-	7.31537e-07	0.00116974	-51.8519
chr12	28069641	28069641	-	9.53212e-07	0.00136486	-57.3593
chr12	28152960	28152960	-	8.35255e-06	0.00482177	-56.4286
chr12	28320103	28320103	-	2.79331e-07	0.000650331	52.1569
chr12	29105634	29105634	-	1.36945e-05	0.00640004	54.0645
chr12	30621198	30621198	-	3.01427e-05	0.0100184	53.7647
chr12	31261442	31261442	-	5.17564e-08	0.000228964	52.1739
chr12	31625870	31625870	+	2.36446e-07	0.000583531	-57.9327
chr12	32384715	32384715	+	9.11489e-06	0.00508055	-57.8704
chr12	33033195	33033195	-	2.04867e-13	3.30506e-08	58.3333
chr12	33399664	33399664	+	1.02201e-05	0.00542206	-57.1429
chr12	33611300	33611300	+	1.63055e-07	0.000464774	59.2593
chr12	34274836	34274836	+	8.92751e-07	0.00131427	-57.6923
chr12	34691009	34691009	-	6.69227e-10	1.46285e-05	-57.5
chr12	34847740	34847740	-	9.38504e-07	0.00135513	-53.5714
chr12	35788793	35788793	+	2.58867e-05	0.00920073	50.7353
chr12	37684932	37684932	+	6.81563e-08	0.000271493	55.5556
chr12	40319064	40319064	-	4.95005e-06	0.00359087	50.8721
chr12	40749953	40749953	-	4.82398e-07	0.000906075	53.964
chr12	41070128	41070128	+	3.45483e-07	0.000741318	52.1739
chr12	42477959	42477959	-	0.000125253	0.0217282	-52.3573
chr12	42792388	42792388	-	2.75362e-06	0.0025608	-51.9841
chr12	44151822	44151822	+	2.59137e-06	0.00247739	55.2874
chr12	44360189	44360189	-	2.77771e-05	0.00957788	52.6667
chr12	45179332	45179332	+	1.06202e-07	0.000354936	-60.8696
chr12	46489897	46489897	-	0.000237671	0.0305767	52.0979
chr12	46651944	46651944	-	4.57784e-06	0.00343052	-51.3196
chr12	46655233	46655233	+	2.82609e-05	0.00966389	-62.2609
chr12	46869863	46869863	+	3.76134e-06	0.00306754	-63.8889
chr12	47061581	47061581	+	3.42769e-07	0.000737917	59.0909
chr12	47335674	47335674	-	1.12737e-05	0.00572874	51.2195
chr12	48144888	48144888	-	1.1996e-05	0.00592958	-50.5411
chr12	48238423	48238423	+	6.29783e-06	0.00411908	-57.2134
chr12	50160240	50160240	-	8.06181e-07	0.00123521	58.6207
chr12	50290811	50290811	+	1.92358e-06	0.00207389	-61.3333
chr12	50383007	50383007	+	1.13992e-05	0.00576648	55.2381
chr12	50593719	50593719	-	6.51338e-06	0.00419494	53.5714
chr12	51364658	51364658	+	2.02978e-05	0.00802489	50.1203
chr12	52738613	52738613	+	1.13702e-07	0.000369937	-58.3333
chr12	53370815	53370815	-	4.76479e-10	1.16275e-05	-59.4907
chr12	53586379	53586379	+	2.93993e-06	0.00266247	56.3585
chr12	53627956	53627956	-	6.88169e-06	0.00433049	52.7778
chr12	53705649	53705649	-	1.42184e-07	0.000426327	50.4522
chr12	53730411	53730411	-	3.23137e-06	0.0028097	-51.3514
chr12	53945238	53945238	-	2.44288e-06	0.00239291	62.5
chr12	54037206	54037206	+	9.07624e-08	0.000322043	-53.4884
chr12	54213813	54213813	-	6.64298e-08	0.000267415	-61.5385
chr12	54422085	54422085	+	1.80287e-06	0.00198984	-52.8571
chr12	54592414	54592414	-	0.000304039	0.0347668	52.7972
chr12	55588653	55588653	+	1.74363e-06	0.00195669	52.7778
chr12	56566495	56566495	-	7.16698e-06	0.00443173	51.7241
chr12	56680516	56680516	+	1.31107e-06	0.00164963	56.6829
chr12	57372757	57372757	-	2.51978e-06	0.00243974	-56
chr12	57891614	57891614	-	2.18718e-05	0.00836445	58.3704
chr12	58354655	58354655	+	5.31946e-08	0.000233379	-52.9412
chr12	58550098	58550098	+	2.27499e-10	7.15374e-06	-52.1739
chr12	58897524	58897524	-	1.16878e-08	9.35158e-05	-51.7241
chr12	59624020	59624020	-	4.43743e-10	1.1032e-05	-52.2285
chr12	61564604	61564604	-	9.1645e-05	0.0183482	54.5584
chr12	65274414	65274414	-	6.07227e-10	1.36141e-05	54.2963
chr12	67461150	67461150	-	7.89206e-10	1.64745e-05	-51.6129
chr12	68702742	68702742	+	7.5689e-09	7.22563e-05	59.7506
chr12	68814033	68814033	+	0.00027905	0.0332437	51.5805
chr12	69085477	69085477	-	7.26861e-06	0.00447219	51.7054
chr12	69290956	69290956	-	4.35674e-06	0.00334125	-56.5217
chr12	69297218	69297218	-	1.03296e-06	0.00143244	54.8387
chr12	70389454	70389454	-	3.72402e-12	3.56596e-07	-68.1818
chr12	70898833	70898833	+	2.79991e-05	0.00962338	50.9231
chr12	71334335	71334335	+	9.65733e-05	0.0188818	56.6138
chr12	71709089	71709089	-	1.46231e-09	2.49917e-05	68
chr12	72301490	72301490	+	4.50871e-07	0.000868044	60.6061
chr12	73210525	73210525	-	7.01993e-07	0.00114019	60.1053
chr12	73568359	73568359	+	9.50811e-08	0.000331502	59.359
chr12	74091648	74091648	-	4.95313e-05	0.0131486	-54.1872
chr12	74094798	74094798	-	3.2262e-08	0.000174644	51.3416
chr12	74797090	74797090	-	3.93033e-10	1.02162e-05	-59.375
chr12	75199024	75199024	-	7.39055e-09	7.12745e-05	57.1429
chr12	75304602	75304602	-	2.7806e-08	0.000157967	63.6552
chr12	75655779	75655779	-	1.3375e-11	9.779e-07	51.5152
chr12	75824132	75824132	+	6.79195e-07	0.00111512	64.4286
chr12	76166458	76166458	-	9.21863e-07	0.00134075	56.7568
chr12	76234200	76234200	-	5.62726e-08	0.000242369	66.596
chr12	77048438	77048438	-	7.50015e-06	0.0045373	-52.5436
chr12	77574449	77574449	+	2.97676e-07	0.000675763	53.3333
chr12	77685415	77685415	+	0.000194838	0.0275581	50.2198
chr12	77747186	77747186	-	4.03292e-07	0.00081264	-63.6364
chr12	78786734	78786734	-	2.24855e-07	0.000566979	53.125
chr12	79214527	79214527	-	2.51143e-07	0.000606885	-59.122
chr12	79226077	79226077	-	1.09396e-05	0.0056225	-52.4103
chr12	79409472	79409472	-	1.15222e-06	0.0015295	56.25
chr12	80065873	80065873	+	3.52051e-10	9.56992e-06	-53.4324
chr12	80563983	80563983	-	2.01592e-05	0.00799787	57.6968
chr12	80715497	80715497	+	9.1147e-06	0.00508055	-51.6129
chr12	80735116	80735116	-	5.36313e-06	0.00375372	-50.3922
chr12	81090535	81090535	-	0.000131398	0.0222941	52.7778
chr12	81226680	81226680	+	2.11956e-07	0.000545495	50.4498
chr12	82270190	82270190	-	3.53906e-06	0.00295928	-51.2381
chr12	82295712	82295712	+	1.94073e-05	0.00781108	52.1739
chr12	82460173	82460173	+	1.48047e-06	0.00177448	-56.6964
chr12	82543031	82543031	+	7.81632e-11	3.32129e-06	68.3794
chr12	82609161	82609161	-	2.1566e-05	0.00829407	-55.8333
chr12	83115933	83115933	-	7.11526e-06	0.00441506	-52.0039
chr12	84537799	84537799	+	3.97014e-06	0.00316742	52.0444
chr12	84568458	84568458	-	1.16534e-07	0.000375629	62.4434
chr12	84874783	84874783	+	9.63369e-09	8.33986e-05	53.5
chr12	84959952	84959952	-	3.51717e-13	5.21605e-08	-59.0365
chr12	85377425	85377425	-	2.24842e-05	0.00849705	54.5455
chr12	85869885	85869885	+	3.54392e-05	0.010952	51.1765
chr12	86072810	86072810	-	1.62829e-07	0.000464399	53.4232
chr12	86232398	86232398	+	2.42717e-10	7.39719e-06	-58.8923
chr12	86655399	86655399	-	2.84754e-07	0.000657185	-65.3846
chr12	87232787	87232787	+	4.69267e-06	0.00347834	-52
chr12	88699662	88699662	-	6.51773e-07	0.00108904	-61.1111
chr12	88897408	88897408	-	3.22399e-06	0.002806	-56.5217
chr12	89259969	89259969	+	1.15807e-06	0.00153137	-54.5455
chr12	90095073	90095073	+	1.58009e-06	0.00184428	61.2795
chr12	90883161	90883161	-	5.60559e-10	1.29191e-05	72.7273
chr12	91989216	91989216	+	4.19903e-10	1.069e-05	74.8337
chr12	92049617	92049617	+	3.40241e-05	0.0107021	55.8333
chr12	93832226	93832226	+	1.67734e-06	0.00191194	-51.348
chr12	94569442	94569442	-	2.26284e-05	0.0085188	54.6207
chr12	95684565	95684565	+	2.73669e-06	0.00255301	-53.3333
chr12	97722331	97722331	+	9.12182e-06	0.00508159	-53.223
chr12	98208318	98208318	-	4.29466e-07	0.000844815	60.1648
chr12	99281172	99281172	+	5.8618e-06	0.00396272	-55.5556
chr12	99303799	99303799	-	9.32914e-07	0.00134995	54.5966
chr12	99413230	99413230	-	5.912e-07	0.00102233	-53.0702
chr12	99645537	99645537	+	6.03579e-21	3.31792e-15	-54.8418
chr12	99645545	99645545	+	5.20426e-23	4.06538e-17	-53.8317
chr12	99645556	99645556	+	4.36755e-15	1.02895e-09	-53.3256
chr12	99645599	99645599	+	1.25898e-14	2.66942e-09	-55.4057
chr12	99645604	99645604	+	1.31834e-11	9.68661e-07	-51.4394
chr12	99645610	99645610	+	2.20973e-11	1.31715e-06	-50.9381
chr12	99737583	99737583	+	1.90189e-06	0.00205579	-65.1515
chr12	100112121	100112121	-	2.24842e-05	0.00849705	54.5455
chr12	100380196	100380196	-	1.89423e-06	0.0020523	59.0909
chr12	100976104	100976104	+	2.56611e-13	4.05176e-08	59.2924
chr12	101362504	101362504	-	2.13466e-08	0.000135554	51.4286
chr12	101802266	101802266	+	3.37164e-07	0.000731826	61.7965
chr12	102523439	102523439	-	3.97931e-05	0.0116788	-52.1538
chr12	102708097	102708097	+	1.80951e-09	2.84803e-05	52.0151
chr12	102897554	102897554	+	2.63134e-08	0.000152617	-62.6935
chr12	103203281	103203281	+	4.57784e-06	0.00343052	-51.3196
chr12	103267809	103267809	+	3.97486e-08	0.000195786	51.8318
chr12	105060118	105060118	-	1.90432e-07	0.00051092	54
chr12	105127680	105127680	-	2.83665e-07	0.00065559	-55.5556
chr12	105129226	105129226	-	2.61786e-07	0.000622892	54.8387
chr12	105311268	105311268	-	1.39573e-06	0.0017102	61.7691
chr12	105437298	105437298	+	1.42337e-07	0.000426465	-55.5556
chr12	105522904	105522904	-	0.000186073	0.0269242	-50.2315
chr12	106589209	106589209	-	3.67629e-09	4.6247e-05	58.3333
chr12	106905768	106905768	+	1.50047e-06	0.00178992	56.7951
chr12	107072120	107072120	-	9.24345e-06	0.00512046	60.2273
chr12	107640680	107640680	-	1.03037e-09	1.96063e-05	-64.2857
chr12	107871317	107871317	-	0.000116013	0.0208882	52.4725
chr12	109603127	109603127	-	4.01346e-10	1.03368e-05	-53.125
chr12	109838322	109838322	+	2.29721e-05	0.00859974	53.0303
chr12	109893863	109893863	-	3.98781e-08	0.000196245	-55.2083
chr12	110847191	110847191	-	1.30315e-07	0.000402948	51.7857
chr12	110916296	110916296	-	1.1969e-05	0.00592428	53.125
chr12	111956441	111956441	-	9.5538e-08	0.00033247	60.7143
chr12	112181671	112181671	+	6.81356e-09	6.78364e-05	-64.8485
chr12	112373042	112373042	-	1.05318e-06	0.00145018	-53.5188
chr12	112597888	112597888	-	2.57826e-06	0.00247186	-59.0909
chr12	112774148	112774148	+	7.57544e-08	0.000288001	59.0909
chr12	112803184	112803184	+	7.91977e-07	0.00122438	-52
chr12	112978472	112978472	+	6.94289e-11	3.0308e-06	-65.1064
chr12	113028703	113028703	+	8.05664e-10	1.66542e-05	-56.25
chr12	113058958	113058958	+	2.5634e-06	0.00246493	56.9458
chr12	113259314	113259314	+	1.19656e-08	9.50721e-05	58.4291
chr12	113469482	113469482	-	5.7579e-08	0.000245644	-56
chr12	114955854	114955854	-	3.71237e-08	0.000187668	-60.9547
chr12	116501795	116501795	+	2.19915e-06	0.00225026	53.3333
chr12	116513984	116513984	-	2.4527e-07	0.000598007	-50.7692
chr12	116564480	116564480	+	3.97068e-10	1.0275e-05	57.1429
chr12	117381272	117381272	+	5.34195e-05	0.0137073	52.2353
chr12	118844464	118844464	-	3.09951e-09	4.09281e-05	-53.7085
chr12	119886297	119886297	-	1.11214e-08	9.08949e-05	75.1918
chr13	3107871	3107871	-	8.39969e-08	0.000306765	55.0514
chr13	3641554	3641554	-	6.38806e-05	0.0151036	53.7757
chr13	5808687	5808687	-	7.91498e-07	0.00122438	52.6144
chr13	6084488	6084488	+	3.26738e-05	0.0104726	-53.0214
chr13	6095298	6095298	-	7.07833e-09	6.94365e-05	53.125
chr13	6211641	6211641	+	2.49615e-05	0.00902732	-51.168
chr13	6625465	6625465	+	4.16242e-09	4.98219e-05	52.5725
chr13	7216684	7216684	-	8.47917e-05	0.0176002	-52.3077
chr13	7928126	7928126	+	4.45759e-07	0.000862133	-55.2885
chr13	9046598	9046598	+	4.05507e-06	0.00320768	-52.9412
chr13	9230667	9230667	-	4.91821e-06	0.00357897	52.1709
chr13	9347137	9347137	+	4.95075e-14	9.30121e-09	57.1429
chr13	10933073	10933073	-	1.2389e-05	0.00604266	-53.8462
chr13	11008512	11008512	+	1.52019e-08	0.000110278	56.6667
chr13	13176233	13176233	+	2.36952e-05	0.00875928	55.1724
chr13	13960955	13960955	+	6.95364e-07	0.00113289	52.7778
chr13	15471383	15471383	-	4.30997e-06	0.00332147	60.6407
chr13	15543461	15543461	-	1.43858e-07	0.00042909	-64.7059
chr13	15624222	15624222	+	0.00014599	0.0236289	50.9259
chr13	15741042	15741042	-	2.76934e-09	3.78131e-05	53.6232
chr13	16312511	16312511	-	6.24677e-08	0.00025776	53.8462
chr13	18923762	18923762	-	3.89839e-09	4.77385e-05	57.5
chr13	19253940	19253940	+	6.23369e-07	0.00105927	-57.5758
chr13	19505401	19505401	+	1.29934e-09	2.30681e-05	53.1507
chr13	19598446	19598446	+	2.66289e-06	0.00251399	-55
chr13	20408229	20408229	-	1.26851e-06	0.00161466	50.641
chr13	20594396	20594396	+	7.67891e-07	0.00120502	56
chr13	20594470	20594470	+	8.29855e-07	0.0012588	64
chr13	20734559	20734559	-	1.03131e-05	0.0054406	-51.3904
chr13	20907413	20907413	-	1.66594e-06	0.00190433	-52.0595
chr13	22242454	22242454	+	9.44259e-06	0.00517879	52.381
chr13	23868907	23868907	+	1.27341e-07	0.000396891	-55.8824
chr13	23995574	23995574	+	5.13293e-09	5.68534e-05	-58.3333
chr13	24551618	24551618	-	5.86136e-08	0.000248156	58.9076
chr13	24685068	24685068	+	7.10953e-08	0.000277685	-53.6585
chr13	24847102	24847102	+	4.75304e-09	5.40987e-05	-68.472
chr13	25607322	25607322	-	5.36501e-07	0.000964088	-51.8519
chr13	25661816	25661816	-	8.84661e-11	3.63718e-06	58.5366
chr13	25742068	25742068	+	1.50913e-06	0.00179464	-63.8695
chr13	25929541	25929541	+	1.74235e-07	0.000482918	-56.5217
chr13	28503352	28503352	+	2.82283e-10	8.34514e-06	-53.8462
chr13	28718580	28718580	+	7.53543e-06	0.00455233	55.1948
chr13	28785091	28785091	-	1.18839e-06	0.00155553	-57.5
chr13	28968010	28968010	+	6.03885e-08	0.000252793	55.1724
chr13	28994711	28994711	-	1.92677e-07	0.000513787	-53.4946
chr13	30194052	30194052	+	8.59857e-09	7.8247e-05	-58.8235
chr13	30250823	30250823	+	3.13329e-06	0.00275289	-54.5455
chr13	30814313	30814313	+	8.49804e-07	0.00127777	-58.7002
chr13	31083902	31083902	+	1.72648e-05	0.00731545	52.7615
chr13	31589122	31589122	+	8.1324e-08	0.00030183	64.8677
chr13	31611260	31611260	+	7.91649e-06	0.00467261	53.8211
chr13	32163008	32163008	+	1.51808e-07	0.000444057	63.2464
chr13	32885338	32885338	-	9.92249e-07	0.00140124	52.5253
chr13	34996575	34996575	-	5.65072e-06	0.00387401	56.8841
chr13	35201126	35201126	+	1.46545e-05	0.00666009	-52.1739
chr13	35366443	35366443	-	2.7956e-05	0.00961078	-53.3333
chr13	35720004	35720004	+	1.37624e-07	0.000417499	-64
chr13	36815292	36815292	+	2.85649e-06	0.00261609	-53.6606
chr13	37498102	37498102	-	1.06537e-07	0.000355521	-69.2308
chr13	37726692	37726692	-	4.63076e-06	0.00345396	54.5455
chr13	38044209	38044209	-	1.06613e-05	0.00554118	-52.3297
chr13	38740779	38740779	+	4.09037e-11	2.0441e-06	60.4651
chr13	38962604	38962604	+	6.80802e-05	0.015627	51.3393
chr13	39766689	39766689	-	9.47093e-07	0.00136131	-50.4934
chr13	39831278	39831278	+	1.08121e-07	0.000357912	-58.0808
chr13	40174474	40174474	+	3.4229e-08	0.000180025	-56.4103
chr13	40355425	40355425	+	8.82327e-09	7.93018e-05	-59.2517
chr13	40779313	40779313	-	5.70339e-05	0.0141707	53.3654
chr13	41502319	41502319	-	8.41209e-10	1.70798e-05	-66.8182
chr13	41559630	41559630	+	7.39084e-08	0.000284112	56.1866
chr13	41671281	41671281	-	7.07404e-07	0.00114584	-57.3376
chr13	42054187	42054187	+	1.79139e-06	0.00198478	64.8571
chr13	42361404	42361404	+	8.82777e-05	0.0179902	57.0652
chr13	42565555	42565555	+	8.78805e-06	0.00496796	53.3333
chr13	42920233	42920233	+	7.18822e-08	0.000279556	53.9244
chr13	43956547	43956547	+	6.56294e-08	0.000265056	-50.6915
chr13	44028479	44028479	+	0.000110622	0.0203528	58.0769
chr13	44028959	44028959	+	8.21257e-06	0.00477296	-60
chr13	44252532	44252532	-	3.72069e-07	0.000775059	52.1739
chr13	44548785	44548785	+	3.50458e-07	0.000748746	50.0675
chr13	44563639	44563639	-	8.87192e-09	7.94468e-05	-59.2593
chr13	44780840	44780840	-	6.18797e-06	0.00407159	57.1429
chr13	45077268	45077268	-	2.18439e-08	0.000137319	53.75
chr13	45257032	45257032	+	7.74269e-06	0.00462115	53.9589
chr13	45399370	45399370	+	1.47391e-06	0.00176875	54.5455
chr13	45439718	45439718	+	3.90628e-07	0.000797161	52.9412
chr13	45649630	45649630	-	5.7133e-07	0.00100068	68.8218
chr13	46254479	46254479	-	4.60734e-06	0.00344148	53.5714
chr13	46363366	46363366	+	9.33113e-12	7.65158e-07	-67.3469
chr13	46442905	46442905	-	2.78452e-05	0.00959402	-50.5128
chr13	46811911	46811911	+	3.5724e-06	0.00297608	53.125
chr13	47004424	47004424	+	5.52774e-09	5.98857e-05	65
chr13	47029717	47029717	-	9.74011e-07	0.00138352	54.0541
chr13	47449281	47449281	-	4.06289e-05	0.0117904	-52.2927
chr13	47451260	47451260	-	1.39365e-05	0.00646137	57.1429
chr13	47572136	47572136	-	4.4634e-06	0.00338613	-53.2819
chr13	47881668	47881668	-	1.12215e-08	9.15356e-05	-52.8261
chr13	48417585	48417585	-	1.38915e-07	0.000420432	-55.1724
chr13	48762096	48762096	+	8.59546e-10	1.73125e-05	52.6452
chr13	48801402	48801402	-	1.03814e-06	0.00143538	51.5152
chr13	50220232	50220232	+	1.41968e-07	0.000426138	54.8387
chr13	51243595	51243595	+	2.88273e-05	0.00977861	51.2407
chr13	51666838	51666838	+	3.97491e-07	0.000805077	-55.0147
chr13	51824756	51824756	+	2.94825e-05	0.00989647	51.1905
chr13	51832210	51832210	-	1.92608e-07	0.000513787	57.0588
chr13	52081274	52081274	-	1.93582e-10	6.41333e-06	65.3073
chr13	52501179	52501179	+	4.14618e-06	0.00324852	-51.5152
chr13	52975716	52975716	-	1.34144e-07	0.000410695	63.5163
chr13	53123385	53123385	+	1.5241e-07	0.000445204	54.1667
chr13	53354370	53354370	-	1.62707e-06	0.00187829	53.8462
chr13	53566008	53566008	-	1.04304e-05	0.00547686	-53.2828
chr13	54145547	54145547	-	2.50806e-09	3.54055e-05	72.7273
chr13	54923742	54923742	-	8.95756e-07	0.0013175	-51.8428
chr13	55109205	55109205	+	7.36051e-06	0.00448309	-56.1905
chr13	55964832	55964832	+	7.73248e-07	0.00120858	53.4722
chr13	56611659	56611659	-	3.75507e-06	0.00306546	-51.1034
chr13	56900453	56900453	+	2.59696e-14	5.28006e-09	78.8043
chr13	56947822	56947822	+	1.79269e-08	0.000122585	53.6585
chr13	57149798	57149798	-	4.67291e-07	0.000888	56.5217
chr13	57560802	57560802	+	5.21629e-05	0.0135294	55.8205
chr13	57721147	57721147	-	2.15316e-06	0.00221913	56.4286
chr13	58325067	58325067	-	3.64849e-06	0.00301276	61.3636
chr13	58453337	58453337	+	9.01362e-10	1.78375e-05	67.6471
chr13	58839526	58839526	+	1.64092e-09	2.6558e-05	-68.5315
chr13	59424953	59424953	+	1.69701e-05	0.00724337	-60.9231
chr13	59720778	59720778	-	1.88523e-06	0.00204762	-54.5455
chr13	59970233	59970233	+	4.01738e-06	0.00319148	53.8462
chr13	60426566	60426566	+	0.00051657	0.045775	-52.3349
chr13	60488152	60488152	+	3.43841e-06	0.00291136	60
chr13	60698034	60698034	+	8.71175e-08	0.00031319	58.3333
chr13	61176374	61176374	+	1.6474e-06	0.0018916	50.9698
chr13	61437993	61437993	-	1.75585e-06	0.00196299	-55.9267
chr13	63372660	63372660	-	1.29026e-09	2.3017e-05	-55.814
chr13	64035699	64035699	-	4.527e-06	0.00340905	-53.125
chr13	64280481	64280481	+	5.90488e-07	0.00102166	-53.5294
chr13	65025754	65025754	-	0.000131398	0.0222941	-52.7851
chr13	65100499	65100499	+	1.53675e-07	0.000447842	65.2505
chr13	67129850	67129850	-	4.36522e-07	0.000852134	-52.406
chr13	68063738	68063738	-	2.97192e-09	3.97383e-05	-54.7619
chr13	68639546	68639546	-	2.1566e-05	0.00829407	52.3949
chr13	68727514	68727514	+	9.19702e-06	0.00510294	-50.2976
chr13	69753530	69753530	+	2.24842e-05	0.00849705	56.5217
chr13	69970085	69970085	+	4.11474e-11	2.04938e-06	57.6923
chr13	70569151	70569151	+	3.18828e-06	0.00278603	-59.3333
chr13	70948764	70948764	-	2.9309e-05	0.00986719	52
chr13	71115113	71115113	+	2.47515e-05	0.00898285	-59.2857
chr13	73114557	73114557	+	1.22771e-09	2.21375e-05	-53.3333
chr13	73154647	73154647	-	1.26186e-06	0.00161128	-51.6923
chr13	73998657	73998657	-	4.09323e-08	0.000198731	53.5714
chr13	74301923	74301923	-	3.28846e-05	0.0105103	52
chr13	76228195	76228195	-	3.40892e-06	0.00289664	-61.8881
chr13	77041937	77041937	+	7.94429e-06	0.00468306	55.1724
chr13	77245204	77245204	-	7.88245e-05	0.0169161	-54.6667
chr13	78166623	78166623	+	0.000325523	0.0360177	-50.1437
chr13	78577990	78577990	-	1.70001e-07	0.000475892	-53.3333
chr13	79643253	79643253	-	1.41962e-06	0.00172536	-52.5
chr13	80938456	80938456	+	6.15124e-06	0.00405839	62.7586
chr13	81631858	81631858	+	1.5045e-08	0.000109605	-55.5556
chr13	81680865	81680865	+	7.49101e-08	0.00028621	53.4884
chr13	81680869	81680869	+	1.08456e-16	3.35356e-11	-86.8275
chr13	82646716	82646716	+	4.25612e-05	0.0121105	-50.641
chr13	83052021	83052021	+	1.31125e-08	9.97526e-05	-63.7255
chr13	84099099	84099099	+	4.13755e-07	0.000824848	-56.4394
chr13	85057840	85057840	+	1.67539e-05	0.00718428	61.0306
chr13	85860831	85860831	-	1.69744e-06	0.0019253	-53.5714
chr13	88129558	88129558	+	1.69429e-06	0.0019246	60.8696
chr13	88951570	88951570	+	4.03415e-07	0.00081264	52.2222
chr13	89777798	89777798	-	1.04624e-06	0.00144342	-54.2308
chr13	90402919	90402919	-	2.28518e-06	0.00230133	-55.3922
chr13	90989733	90989733	+	1.25286e-08	9.75608e-05	50.5
chr13	91516122	91516122	-	1.85149e-06	0.00202418	57.1429
chr13	93096018	93096018	-	1.83639e-09	2.86603e-05	71.4052
chr13	93407795	93407795	-	4.36401e-10	1.09674e-05	50.9868
chr13	94097047	94097047	-	2.40947e-08	0.000144679	-55.5556
chr13	95797070	95797070	-	7.76138e-07	0.00121157	52.1739
chr13	95799307	95799307	-	3.45551e-06	0.00291666	51.8519
chr13	95940926	95940926	-	1.57346e-05	0.00693617	-56.5934
chr13	97904189	97904189	-	1.99562e-08	0.000130443	-61.1111
chr13	97998011	97998011	+	1.54277e-06	0.00181761	-56.3704
chr13	98335503	98335503	+	9.49131e-08	0.000331228	51.2821
chr13	99115962	99115962	-	2.51104e-06	0.00243414	51.1607
chr13	99373359	99373359	-	1.71575e-05	0.00729516	-52.2222
chr13	99377436	99377436	-	5.74129e-05	0.0142247	-50.7123
chr13	99722844	99722844	-	1.9039e-07	0.000510901	61.2701
chr13	100179180	100179180	+	1.2546e-06	0.00160786	55.3175
chr13	100398284	100398284	+	6.71676e-05	0.0155019	50.4836
chr13	101448054	101448054	+	4.62102e-07	0.000881708	-54.5455
chr13	101581391	101581391	+	3.15252e-09	4.14071e-05	-64
chr13	101744035	101744035	-	4.10051e-05	0.0118512	53.4527
chr13	102131683	102131683	-	2.21481e-07	0.000561058	-60.8571
chr13	102241200	102241200	-	9.0771e-14	1.56655e-08	-54.8611
chr13	102594668	102594668	-	3.28846e-05	0.0105103	-52
chr13	103067532	103067532	+	5.52421e-08	0.00023974	-61.8182
chr13	103702665	103702665	-	1.05929e-05	0.00552698	58.5
chr13	104124182	104124182	-	5.42878e-08	0.000236636	62.0027
chr13	104268320	104268320	+	1.94156e-08	0.000128779	-62.9447
chr13	104621736	104621736	-	1.58996e-07	0.000457599	-50.8681
chr13	105108757	105108757	-	2.81252e-09	3.82269e-05	-53.3333
chr13	105588743	105588743	+	5.99765e-08	0.000251827	51.6846
chr13	105937240	105937240	+	7.21136e-06	0.00445224	-50.6944
chr13	106749337	106749337	-	2.47788e-07	0.000601892	-65.8371
chr13	106951281	106951281	-	5.24114e-06	0.00370886	54.1667
chr13	108534389	108534389	-	4.62102e-07	0.000881708	-54.5455
chr13	108724118	108724118	-	1.83898e-06	0.00201539	57.2222
chr13	109363233	109363233	-	1.93362e-07	0.000515149	58.3333
chr13	109747618	109747618	+	5.11708e-10	1.22103e-05	51.1628
chr13	110006804	110006804	+	4.02094e-08	0.000196626	55.6581
chr13	110895886	110895886	-	1.19388e-06	0.00156052	55.7692
chr13	111396944	111396944	-	1.66213e-05	0.00715328	-55.5556
chr13	111741350	111741350	+	6.35042e-07	0.00107137	51.7241
chr13	111762841	111762841	+	2.51678e-07	0.000607486	-56.0777
chr13	111781967	111781967	+	3.31262e-08	0.000177043	-53.3333
chr13	111811549	111811549	-	2.08778e-05	0.00815213	53.3953
chr13	112984551	112984551	-	1.48189e-07	0.000436868	60
chr13	113094104	113094104	-	7.82475e-05	0.016864	52.1978
chr13	113349347	113349347	-	2.05455e-07	0.000535169	56.6952
chr13	113382411	113382411	-	1.09624e-06	0.00148562	53.2051
chr13	113468580	113468580	+	2.19915e-06	0.00225026	-53.3333
chr13	113613239	113613239	-	8.29526e-06	0.00479997	50.3676
chr13	114436440	114436440	-	1.55669e-07	0.000450939	-53.6508
chr13	115031719	115031719	+	4.72337e-07	0.000894504	-51.2531
chr13	115392411	115392411	+	3.13756e-05	0.0102437	-51.4286
chr13	115748285	115748285	+	1.94404e-06	0.00208692	-51.7241
chr13	117144416	117144416	+	4.42788e-05	0.0123786	52.9644
chr13	117777994	117777994	-	8.70276e-06	0.00493854	-52.7742
chr13	118648417	118648417	-	3.76545e-07	0.000780657	-72.0779
chr13	119138028	119138028	-	3.5724e-06	0.00297608	-53.125
chr14	7284002	7284002	-	8.84685e-09	7.93869e-05	-52.1038
chr14	7991551	7991551	+	1.09207e-05	0.00561686	-60.8696
chr14	8094454	8094454	-	3.23863e-09	4.23882e-05	58.8235
chr14	8111647	8111647	+	2.25547e-06	0.00228333	-59.7826
chr14	8217243	8217243	+	5.31e-05	0.0136584	52
chr14	8445302	8445302	-	3.84669e-09	4.74983e-05	-57.7381
chr14	9287417	9287417	+	3.13027e-06	0.00275138	52.7778
chr14	10341334	10341334	-	2.36274e-06	0.00234738	62.2549
chr14	10632730	10632730	-	1.73905e-06	0.00195366	-50.3947
chr14	11718311	11718311	-	5.05958e-06	0.00363548	58.0645
chr14	12188152	12188152	-	2.63497e-06	0.0024994	51.3514
chr14	12189786	12189786	-	8.93353e-10	1.77977e-05	-68.7675
chr14	13442098	13442098	-	2.27844e-09	3.33171e-05	-50.7184
chr14	13793948	13793948	+	3.42769e-07	0.000737917	-59.0909
chr14	14366133	14366133	+	7.06463e-06	0.0043999	55.5556
chr14	15868951	15868951	+	7.17066e-07	0.00115556	54.8387
chr14	16424820	16424820	+	1.99958e-06	0.0021191	64.3357
chr14	16509062	16509062	+	2.10498e-06	0.00218937	58.8745
chr14	16718477	16718477	-	7.98141e-10	1.6568e-05	-60
chr14	16797388	16797388	-	3.64107e-07	0.000765565	-54.0351
chr14	16857257	16857257	-	1.99015e-05	0.00793455	50.0754
chr14	17339599	17339599	+	1.89132e-05	0.00769961	52.0325
chr14	17621183	17621183	+	1.35973e-06	0.00168331	-56.5217
chr14	18020074	18020074	+	5.21895e-09	5.74631e-05	67.9374
chr14	18236528	18236528	-	6.31814e-06	0.0041269	-50.905
chr14	18483852	18483852	+	0.00028604	0.033667	51.5152
chr14	18979753	18979753	-	1.35189e-06	0.00167722	55.5556
chr14	19196016	19196016	+	2.01048e-06	0.0021258	-52.0609
chr14	19303056	19303056	-	1.09229e-05	0.00561763	-56.288
chr14	19805897	19805897	-	3.28865e-07	0.000719494	-51.8519
chr14	20185891	20185891	-	1.54428e-07	0.000448979	58.8235
chr14	20230945	20230945	+	8.19239e-06	0.00476611	55.9524
chr14	21479695	21479695	-	6.74113e-05	0.0155426	-56.0606
chr14	21574093	21574093	-	1.2244e-07	0.000387935	-50.9243
chr14	21948167	21948167	+	3.39029e-08	0.000179391	58.8235
chr14	22451864	22451864	-	9.66711e-08	0.000334843	58.6207
chr14	22743989	22743989	+	6.73039e-06	0.00428492	-50.8929
chr14	23394878	23394878	-	1.11374e-05	0.00568022	52.1739
chr14	23634094	23634094	+	4.57784e-06	0.00343052	-51.3196
chr14	24068582	24068582	-	2.06484e-06	0.00216172	50.9044
chr14	24547236	24547236	-	3.15638e-08	0.000172233	55.7971
chr14	24641384	24641384	+	4.7659e-09	5.41209e-05	-55.7312
chr14	24859640	24859640	-	1.94325e-08	0.000128779	61.5385
chr14	24976454	24976454	+	6.60058e-09	6.6418e-05	52.6252
chr14	25209138	25209138	+	5.0887e-08	0.000226737	67.5269
chr14	25437534	25437534	-	1.1999e-06	0.00156383	-53.8462
chr14	25713227	25713227	-	5.09028e-10	1.22053e-05	-62.5373
chr14	25772705	25772705	+	1.74902e-08	0.000120292	56.0819
chr14	25775242	25775242	+	5.21425e-08	0.000230123	-52.7778
chr14	26802328	26802328	-	7.53732e-05	0.0165301	-56.3241
chr14	27290797	27290797	-	3.15125e-08	0.000172143	53.9352
chr14	27366230	27366230	-	1.53576e-06	0.00181365	52.5517
chr14	27811899	27811899	-	1.66188e-05	0.00715298	-54.5455
chr14	27877997	27877997	+	3.28846e-05	0.0105103	-52
chr14	28892486	28892486	+	2.64389e-05	0.00931028	-52.381
chr14	29014485	29014485	+	6.57855e-06	0.00422168	-53.1579
chr14	29485622	29485622	+	3.00653e-06	0.00269236	57.1429
chr14	29526889	29526889	+	6.64481e-06	0.00424639	53.4914
chr14	30327199	30327199	+	2.75493e-05	0.00953203	53.3333
chr14	30684455	30684455	-	4.01738e-06	0.00319148	-55.5556
chr14	31190689	31190689	-	2.83665e-07	0.00065559	55.5556
chr14	31268077	31268077	-	1.04379e-07	0.000352061	62.3992
chr14	32121077	32121077	-	8.98392e-11	3.68344e-06	-52.381
chr14	32536376	32536376	+	1.30137e-08	9.9255e-05	56.4302
chr14	33046141	33046141	-	2.46417e-06	0.00240663	51.0425
chr14	33081951	33081951	-	1.01786e-10	4.05018e-06	-55.7692
chr14	33528916	33528916	-	2.1037e-07	0.000543866	56.7084
chr14	33884849	33884849	+	3.01655e-10	8.60184e-06	65.3846
chr14	33893588	33893588	+	1.06341e-07	0.00035532	53.2635
chr14	34081782	34081782	+	2.97676e-07	0.000675763	-53.3333
chr14	34119669	34119669	+	1.05474e-06	0.00145129	-61.9048
chr14	34533981	34533981	+	4.34132e-06	0.00333511	-54.6027
chr14	34783541	34783541	-	0.000171986	0.0257442	59.0909
chr14	35150996	35150996	+	1.4372e-11	1.01577e-06	61.6244
chr14	35155325	35155325	-	1.32115e-05	0.00627028	-52.4768
chr14	35576638	35576638	+	2.30169e-08	0.000141215	-61.2903
chr14	35672492	35672492	-	2.04914e-08	0.000132578	-60
chr14	35783618	35783618	-	1.34546e-07	0.000411317	52
chr14	35807946	35807946	+	7.38219e-07	0.00117675	54.2857
chr14	35812066	35812066	-	3.51468e-08	0.000181786	70.8333
chr14	35914222	35914222	+	1.85221e-07	0.000503123	55.1724
chr14	36614408	36614408	+	9.82974e-08	0.000338816	50.9973
chr14	37073027	37073027	+	7.73248e-07	0.00120858	53.4722
chr14	37567971	37567971	-	3.23998e-06	0.0028148	53.3333
chr14	38083849	38083849	+	1.1456e-09	2.11744e-05	-52.9412
chr14	38633196	38633196	+	1.83941e-08	0.000124451	63.3333
chr14	40019023	40019023	-	1.39913e-09	2.42783e-05	-53.7291
chr14	40651048	40651048	-	2.89686e-07	0.000664444	56.7568
chr14	41977685	41977685	+	4.21662e-05	0.0120492	50.9259
chr14	41983901	41983901	+	2.91643e-08	0.000163013	-64.2857
chr14	42856645	42856645	-	5.59539e-09	6.02745e-05	-54.1667
chr14	45661482	45661482	-	1.0919e-05	0.00561622	53.8462
chr14	46227348	46227348	+	9.61772e-10	1.86842e-05	57.6329
chr14	46481543	46481543	-	1.50831e-06	0.00179408	-51.8519
chr14	46711186	46711186	-	9.95904e-06	0.00534181	-54.961
chr14	46771653	46771653	+	2.4308e-05	0.0088854	-52.5
chr14	46907670	46907670	-	6.10041e-07	0.001043	-56.528
chr14	47395705	47395705	-	2.27296e-06	0.00229395	57.0806
chr14	47497722	47497722	+	8.03154e-06	0.00471759	50.625
chr14	48890185	48890185	+	6.30449e-05	0.0149967	-50.6571
chr14	49314453	49314453	+	9.01709e-07	0.00132363	55.4511
chr14	49315266	49315266	+	3.36622e-08	0.000178754	-56.936
chr14	49430478	49430478	+	1.92902e-10	6.40509e-06	-58.2428
chr14	50939403	50939403	+	5.17883e-06	0.00368414	-62.1578
chr14	51145278	51145278	+	3.65058e-07	0.000766694	52.7409
chr14	51337043	51337043	+	1.09877e-07	0.000361358	62.5
chr14	54226439	54226439	+	1.33975e-10	4.92131e-06	55.814
chr14	54583203	54583203	-	0.000237866	0.0305978	-51.25
chr14	54694197	54694197	+	1.72203e-07	0.000479779	66.6667
chr14	55132425	55132425	+	9.4018e-06	0.00516671	60.0733
chr14	56593334	56593334	+	4.05022e-05	0.011766	-52
chr14	56633622	56633622	-	5.06687e-10	1.21688e-05	-53.2274
chr14	57838772	57838772	-	4.96893e-08	0.000223754	-52
chr14	58079946	58079946	-	5.19342e-11	2.43159e-06	69.0476
chr14	58229300	58229300	+	9.31716e-07	0.00134874	-51.4652
chr14	58316122	58316122	+	2.06424e-06	0.00216124	-53.4884
chr14	58939172	58939172	-	2.32425e-05	0.00866039	-60.6719
chr14	59397073	59397073	-	1.53914e-06	0.0018146	-62.963
chr14	59640988	59640988	-	3.55635e-08	0.000182576	57.1429
chr14	59751080	59751080	-	6.0482e-09	6.29068e-05	54.2857
chr14	59784343	59784343	+	0.000312568	0.0353081	53.2091
chr14	61005506	61005506	+	1.11225e-06	0.00149844	-57.5758
chr14	62605954	62605954	-	1.19831e-09	2.1796e-05	56.4089
chr14	62869264	62869264	+	6.92302e-06	0.00434673	55.3476
chr14	63166193	63166193	-	1.38593e-06	0.00170247	60
chr14	63405989	63405989	-	3.01662e-06	0.00269712	-51.6129
chr14	63422854	63422854	-	4.10997e-06	0.00323229	50.0442
chr14	63848895	63848895	+	5.69221e-07	0.000998043	58.4314
chr14	63967725	63967725	-	5.51552e-07	0.000981324	-61.7647
chr14	65043598	65043598	+	5.25399e-07	0.000953975	58.6207
chr14	65479433	65479433	-	4.38294e-06	0.00335057	-51.5152
chr14	65643590	65643590	-	7.62328e-05	0.0166192	-57.5652
chr14	65740041	65740041	+	5.369e-06	0.00375653	55.1411
chr14	66499503	66499503	+	4.96918e-06	0.00359701	-53.4884
chr14	67274272	67274272	-	2.96597e-06	0.00267453	50.8446
chr14	67278302	67278302	-	1.87006e-07	0.000505082	60
chr14	67440032	67440032	+	1.5259e-10	5.41806e-06	66.1905
chr14	67504145	67504145	-	7.86573e-08	0.000294511	54.8387
chr14	68251330	68251330	+	7.38175e-10	1.57832e-05	57.4595
chr14	68694920	68694920	+	1.06159e-05	0.00553199	-59.2593
chr14	70058756	70058756	+	3.30252e-08	0.000176891	57.7778
chr14	70531666	70531666	-	1.53932e-08	0.000110906	-58.6207
chr14	70867649	70867649	+	5.86361e-08	0.000248156	53.3333
chr14	72105736	72105736	+	3.78063e-07	0.000782603	52.2727
chr14	72298047	72298047	-	4.527e-06	0.00340905	53.125
chr14	72468052	72468052	-	5.23714e-11	2.44435e-06	65.5172
chr14	72496371	72496371	+	1.56785e-07	0.000453168	-52.8317
chr14	72764323	72764323	-	5.06695e-07	0.000932655	52.1739
chr14	74369570	74369570	-	3.27098e-10	9.09145e-06	63.6364
chr14	76445388	76445388	-	1.02909e-07	0.000348811	57.4178
chr14	76700352	76700352	+	6.81996e-05	0.0156391	54.9451
chr14	77067921	77067921	+	1.47573e-05	0.00668631	53.0769
chr14	77106085	77106085	+	3.95856e-07	0.00080319	52
chr14	77110634	77110634	+	1.65896e-09	2.67055e-05	55.7692
chr14	78206028	78206028	+	1.68092e-09	2.70297e-05	-69.7472
chr14	78249844	78249844	+	8.30299e-08	0.000305261	57.6923
chr14	79009781	79009781	+	5.18035e-09	5.71229e-05	54.9784
chr14	79112567	79112567	+	4.0443e-05	0.0117585	-52.3969
chr14	79123866	79123866	+	1.9833e-05	0.00791554	50.041
chr14	79134892	79134892	-	1.03151e-08	8.71361e-05	-66.5517
chr14	79156332	79156332	+	5.30026e-06	0.00372989	-56.2319
chr14	79757866	79757866	+	2.3052e-10	7.19536e-06	67.2432
chr14	80217066	80217066	-	2.38734e-08	0.000144191	78.2609
chr14	80904819	80904819	-	1.06897e-05	0.00554808	54.3699
chr14	81638706	81638706	+	9.38504e-07	0.00135513	-53.5714
chr14	84744726	84744726	+	4.06203e-06	0.00321113	51.7647
chr14	85109910	85109910	+	5.97432e-06	0.00400591	52.3719
chr14	85218383	85218383	-	1.27039e-07	0.00039643	60.0496
chr14	85520879	85520879	-	3.81232e-08	0.000190772	53.3333
chr14	85844954	85844954	-	1.51317e-06	0.00179756	51.7375
chr14	86287977	86287977	+	6.1439e-06	0.00405551	-51.9836
chr14	86850533	86850533	+	1.60252e-05	0.00700251	50.9259
chr14	87963234	87963234	-	2.86375e-05	0.00974642	-53.3613
chr14	88426171	88426171	-	2.25248e-06	0.00228155	-54.1667
chr14	90822496	90822496	-	1.84523e-05	0.00758626	51.5152
chr14	92545222	92545222	-	2.00769e-09	3.0677e-05	58.3333
chr14	93177469	93177469	-	4.99492e-07	0.000924264	53
chr14	93373636	93373636	+	1.45245e-07	0.000431839	57.6923
chr14	98472621	98472621	-	5.81869e-06	0.00394904	-57.8579
chr14	98809904	98809904	-	1.40173e-06	0.00171486	-59.0909
chr14	99018899	99018899	-	7.88957e-09	7.4453e-05	-63.2169
chr14	100293035	100293035	+	1.74235e-07	0.000482918	-56.5217
chr14	101124229	101124229	-	9.4894e-05	0.0186973	54.3704
chr14	101890058	101890058	+	0.000158899	0.024702	54.9784
chr14	104444586	104444586	+	8.13258e-06	0.00474972	-58.3333
chr14	105061803	105061803	+	1.52679e-06	0.00180718	51.6667
chr14	105387377	105387377	-	5.47173e-07	0.000976224	50.2503
chr14	106027007	106027007	-	3.75399e-05	0.0112923	-58.0268
chr14	106204061	106204061	-	2.26395e-09	3.32521e-05	-72
chr14	106579922	106579922	-	1.03239e-06	0.00143236	-56.5217
chr14	107589355	107589355	-	1.64248e-07	0.000467098	51.7241
chr14	107771130	107771130	-	1.0919e-05	0.00561622	-53.8462
chr14	108617977	108617977	-	2.73669e-06	0.00255301	-53.3333
chr14	110089498	110089498	+	3.11196e-07	0.000696463	65.2174
chr14	110273651	110273651	+	1.27564e-06	0.00161808	-65.812
chr14	111727000	111727000	-	2.64763e-07	0.000627538	61.1643
chr14	111978233	111978233	+	5.78633e-09	6.13877e-05	62.9934
chr14	111978238	111978238	+	7.9674e-09	7.47517e-05	62.5
chr14	113380806	113380806	-	3.64849e-06	0.00301276	-56.4263
chr14	113533175	113533175	+	6.85507e-07	0.00112308	62.069
chr14	114484897	114484897	-	2.88829e-06	0.00263416	-62.5
chr14	115513168	115513168	+	1.79151e-05	0.00747965	-50.4167
chr14	116106234	116106234	+	2.23567e-06	0.00227181	59.5055
chr14	116547777	116547777	+	7.49106e-09	7.18701e-05	56.5217
chr14	116579603	116579603	+	1.46545e-05	0.00666009	52.1739
chr14	117789112	117789112	+	5.52387e-07	0.000982187	56.4626
chr14	118031770	118031770	+	0.00010503	0.0197553	-53.7879
chr14	118767449	118767449	+	5.93001e-06	0.00399029	-56.5217
chr14	118857234	118857234	-	3.57168e-07	0.000758614	-56.6416
chr14	119340037	119340037	+	1.05562e-08	8.81686e-05	60.8696
chr14	120114733	120114733	+	3.13329e-05	0.0102361	51.2121
chr14	120484952	120484952	+	2.12405e-06	0.0021995	52
chr14	121354169	121354169	+	2.17176e-05	0.00833102	-51.7241
chr14	121496481	121496481	+	6.46134e-07	0.00108203	-57.619
chr14	121668389	121668389	+	8.7554e-07	0.00130118	53.5
chr14	122280172	122280172	-	1.80707e-08	0.000123144	60.0304
chr14	122280300	122280300	-	6.47979e-10	1.42269e-05	51.2821
chr14	122358354	122358354	-	1.36639e-08	0.000102373	-54.1667
chr14	122364879	122364879	+	1.45663e-07	0.00043291	-50.5572
chr14	122388142	122388142	-	5.32785e-13	7.18878e-08	-86.3445
chr15	3197412	3197412	-	1.15121e-05	0.00579399	-52.6667
chr15	5493596	5493596	+	2.59137e-06	0.00247739	-56.5517
chr15	5841281	5841281	-	4.23378e-07	0.000837063	-51.7045
chr15	6460727	6460727	+	2.69119e-06	0.00252867	-51.3514
chr15	7757225	7757225	-	1.25845e-06	0.00160982	-53.5714
chr15	8110918	8110918	-	0.000111638	0.0204398	-52.5815
chr15	8170583	8170583	-	2.63197e-07	0.000624525	-59.0909
chr15	8469097	8469097	-	3.42477e-06	0.00290363	55.8333
chr15	9007910	9007910	+	1.07104e-05	0.00555608	56.379
chr15	9562910	9562910	+	1.80258e-06	0.00198974	-62.4714
chr15	10137634	10137634	+	1.63151e-06	0.00187961	50.6306
chr15	11300647	11300647	+	4.13108e-07	0.000824196	52.3627
chr15	12196312	12196312	-	5.19659e-10	1.23483e-05	-72
chr15	12382607	12382607	-	7.91025e-07	0.00122438	54.1667
chr15	12580830	12580830	+	2.66258e-09	3.6933e-05	63.7117
chr15	13450808	13450808	-	5.3338e-05	0.0136971	53.2143
chr15	13735146	13735146	-	6.57135e-08	0.000265251	50.6576
chr15	14562299	14562299	+	1.35973e-06	0.00168331	-56.5217
chr15	15070549	15070549	-	6.00355e-06	0.00401647	-54.4643
chr15	16293702	16293702	-	1.05865e-10	4.14487e-06	-62.1212
chr15	16429036	16429036	-	2.97871e-06	0.00268165	52.6144
chr15	16895319	16895319	+	4.73164e-07	0.000894504	-55.1282
chr15	20151904	20151904	-	0.000340442	0.0368866	-50.5952
chr15	21400519	21400519	+	2.9309e-05	0.00986719	52
chr15	21722124	21722124	-	3.74053e-08	0.000188514	57.7485
chr15	21901900	21901900	-	5.34185e-08	0.000233877	-65
chr15	21903533	21903533	+	7.42731e-08	0.000284924	-50.6957
chr15	23463364	23463364	-	1.0995e-06	0.00148841	-51.7241
chr15	23477230	23477230	-	3.78645e-08	0.000190136	-59.0909
chr15	23555023	23555023	-	3.57763e-08	0.000183197	51.8519
chr15	24933000	24933000	-	4.84341e-08	0.000220443	-57.6923
chr15	25677844	25677844	+	1.89281e-07	0.00050866	51.0277
chr15	25875063	25875063	-	5.52272e-10	1.27877e-05	62.5761
chr15	26009074	26009074	+	4.60734e-06	0.00344148	53.5714
chr15	26236507	26236507	-	1.15807e-06	0.00153137	-54.5455
chr15	26365905	26365905	+	1.21311e-10	4.54621e-06	56.8182
chr15	26387629	26387629	+	1.26542e-11	9.38469e-07	79.5417
chr15	26588249	26588249	+	0.000163721	0.025113	52.8846
chr15	27868618	27868618	-	1.9366e-07	0.000515573	57.6923
chr15	28630044	28630044	-	1.62076e-06	0.00187436	-53.6585
chr15	30153221	30153221	-	5.3402e-05	0.0137047	51.3825
chr15	30291010	30291010	-	1.79567e-06	0.00198818	51.3445
chr15	30791377	30791377	+	7.94115e-06	0.00468157	55.5556
chr15	30867772	30867772	+	6.76963e-08	0.000270532	-69.5055
chr15	32004745	32004745	+	5.06695e-07	0.000932655	-52.1739
chr15	32046860	32046860	-	1.8623e-07	0.000504297	60.1399
chr15	32521074	32521074	+	7.55963e-09	7.22479e-05	54.8927
chr15	32636348	32636348	-	8.47331e-05	0.0175933	-51.4286
chr15	32967159	32967159	+	4.01852e-10	1.03368e-05	82.0588
chr15	33626865	33626865	-	9.15079e-08	0.000324069	-71.3103
chr15	35009298	35009298	-	0.000164691	0.025204	-52.8986
chr15	35895518	35895518	-	0.000192096	0.0273319	-53.75
chr15	36245454	36245454	-	4.26329e-07	0.000841439	-54.069
chr15	36960122	36960122	-	8.52279e-11	3.52357e-06	-66.6667
chr15	37166772	37166772	-	8.89433e-09	7.95245e-05	-50.3151
chr15	37407257	37407257	-	4.9635e-08	0.000223578	71.4286
chr15	37689015	37689015	-	6.85507e-07	0.00112308	62.069
chr15	37851248	37851248	-	7.80315e-07	0.00121616	-52.5408
chr15	38007468	38007468	+	0.000250069	0.0314218	53.4392
chr15	38082660	38082660	+	1.24429e-07	0.000390853	51.5521
chr15	38428366	38428366	+	7.66725e-07	0.00120457	51.3514
chr15	39040075	39040075	+	7.59182e-07	0.00119683	-51.3514
chr15	41206465	41206465	+	3.44754e-11	1.82095e-06	75.4135
chr15	43052952	43052952	+	1.15049e-06	0.0015288	53.125
chr15	43076192	43076192	-	1.03069e-06	0.00143156	-52.8763
chr15	43118646	43118646	+	2.46607e-10	7.48501e-06	-70.7513
chr15	43267364	43267364	-	5.09972e-08	0.000226947	-58.7607
chr15	43472505	43472505	-	0.000145724	0.0236093	-51.6667
chr15	46911215	46911215	-	4.14618e-06	0.00324852	51.5152
chr15	48277675	48277675	+	8.51684e-06	0.00487815	-52.1739
chr15	48443633	48443633	-	4.52586e-05	0.0125408	54.7619
chr15	48820800	48820800	-	0.000243083	0.0309471	50.1553
chr15	50347006	50347006	-	6.18058e-06	0.00406888	52
chr15	50791814	50791814	+	8.40903e-08	0.000306907	52.1978
chr15	50877476	50877476	-	2.2078e-08	0.000138147	51.4009
chr15	51549707	51549707	+	2.78452e-05	0.00959402	-50.5128
chr15	51634880	51634880	+	6.3595e-10	1.41089e-05	-60.5263
chr15	52046172	52046172	-	5.21357e-06	0.00369787	-51.7241
chr15	53423092	53423092	-	4.37768e-10	1.09674e-05	60.7143
chr15	53905220	53905220	-	1.39771e-06	0.00171203	50.1299
chr15	54037685	54037685	-	1.91627e-05	0.00776198	-57.1429
chr15	55667983	55667983	-	9.72756e-09	8.39404e-05	52.7778
chr15	58082173	58082173	+	3.48165e-07	0.000745402	58.7719
chr15	58798355	58798355	-	6.80992e-05	0.0156287	53.6364
chr15	58973858	58973858	+	5.31946e-08	0.000233379	-52.9412
chr15	59101671	59101671	+	3.24365e-06	0.0028175	-51.8797
chr15	59157151	59157151	+	0.000174316	0.0259521	-51.6667
chr15	59179184	59179184	-	4.06432e-09	4.89635e-05	-53.4884
chr15	59792899	59792899	-	2.98791e-07	0.000677787	53.2669
chr15	59830142	59830142	+	2.23087e-07	0.000564069	-56.6667
chr15	60214287	60214287	+	3.47483e-05	0.0108265	52.381
chr15	60760569	60760569	+	3.13329e-06	0.00275289	54.5455
chr15	61336680	61336680	+	9.30112e-10	1.82483e-05	58.5366
chr15	62020393	62020393	-	4.01348e-06	0.00319095	57.6923
chr15	62128285	62128285	-	3.74368e-05	0.0112704	57.4359
chr15	62388185	62388185	+	1.28079e-08	9.85e-05	52.7778
chr15	62801825	62801825	+	2.83015e-08	0.000159777	-52
chr15	62913665	62913665	+	0.000546501	0.0471219	-54
chr15	64007019	64007019	+	2.1544e-11	1.29787e-06	-54.3478
chr15	64152654	64152654	-	1.09908e-06	0.00148841	60.7949
chr15	64175454	64175454	+	3.73198e-08	0.000188339	66.1765
chr15	64195286	64195286	-	2.35347e-06	0.00234257	55.5556
chr15	64404324	64404324	-	0.000171986	0.0257442	59.0909
chr15	64737056	64737056	-	5.30454e-09	5.80609e-05	58.3333
chr15	64885217	64885217	+	4.36255e-09	5.15111e-05	-50.5185
chr15	66802465	66802465	+	2.48566e-11	1.45246e-06	61.4751
chr15	66916741	66916741	+	4.50892e-06	0.00340448	54.5366
chr15	67011926	67011926	+	3.17839e-09	4.171e-05	-50.8772
chr15	67188174	67188174	+	5.56547e-07	0.000985605	-50.7246
chr15	68003414	68003414	-	2.23918e-08	0.000138997	-55.7505
chr15	68423411	68423411	+	1.9788e-08	0.000129954	52.381
chr15	68643247	68643247	+	2.7958e-07	0.000650548	57.0946
chr15	69491619	69491619	+	6.43964e-06	0.00417437	55.5556
chr15	69698367	69698367	+	1.06503e-11	8.3196e-07	-55.5556
chr15	69816090	69816090	-	3.9799e-09	4.84976e-05	-55.5556
chr15	69934079	69934079	-	3.65185e-14	7.22683e-09	-67.4419
chr15	71480674	71480674	+	6.91871e-10	1.50656e-05	57.1429
chr15	71935640	71935640	-	3.43825e-05	0.0107624	-51.6129
chr15	72003834	72003834	-	8.90007e-08	0.000317767	62.0168
chr15	72678491	72678491	+	9.48714e-08	0.000331228	51.1111
chr15	72897255	72897255	+	4.35781e-08	0.000207202	57.1429
chr15	73214200	73214200	+	1.40711e-06	0.00171691	64.7619
chr15	73324336	73324336	+	8.86006e-13	1.09585e-07	72.5
chr15	74049437	74049437	-	7.32225e-08	0.0002825	69.2308
chr15	74102558	74102558	+	9.69808e-06	0.00525874	-51.6129
chr15	74447478	74447478	+	9.5205e-07	0.0013643	57.3427
chr15	74665242	74665242	+	4.71635e-07	0.000893891	-53.4783
chr15	74723027	74723027	+	1.02255e-10	4.05796e-06	55.8824
chr15	75582779	75582779	-	1.11906e-05	0.00569904	-59.0909
chr15	75860868	75860868	-	1.27177e-05	0.00613269	-63.2867
chr15	75984610	75984610	-	2.44048e-07	0.000596441	58.3333
chr15	77269909	77269909	+	0.000133377	0.0224719	-55.5944
chr15	78522232	78522232	-	3.16039e-05	0.0102898	50.9217
chr15	78742007	78742007	+	7.7678e-10	1.63533e-05	-54.0909
chr15	79459255	79459255	-	1.20219e-05	0.00593917	53.4632
chr15	79502112	79502112	+	2.36494e-07	0.000583552	-53.4884
chr15	79722387	79722387	+	6.4359e-09	6.53273e-05	54.8801
chr15	80109234	80109234	-	2.19588e-10	6.97891e-06	-53.3333
chr15	80162389	80162389	-	8.51809e-08	0.000309062	-52.7143
chr15	80545814	80545814	-	0.000132803	0.0224139	52.3873
chr15	81130046	81130046	+	4.62568e-08	0.000213612	-51.333
chr15	81792090	81792090	+	0.000189973	0.0271981	-53.592
chr15	82209982	82209982	+	9.23e-05	0.0184267	-51.7949
chr15	82230896	82230896	+	3.57823e-07	0.000759019	61.5385
chr15	82448109	82448109	+	1.92728e-08	0.000128216	58.9852
chr15	82741004	82741004	+	1.61918e-07	0.000462956	56.6667
chr15	83553627	83553627	+	2.06669e-06	0.00216243	53.6585
chr15	83980190	83980190	-	2.43241e-05	0.00888974	-52.4107
chr15	84003499	84003499	+	1.08977e-07	0.000359193	55.5556
chr15	84017935	84017935	+	1.59545e-08	0.000112975	61.8182
chr15	84038350	84038350	+	0.000164176	0.0251568	-51.4245
chr15	84372223	84372223	+	5.06808e-06	0.00363932	-52.1739
chr15	84525672	84525672	+	3.92027e-06	0.00314922	-51.6656
chr15	84615895	84615895	+	3.20251e-08	0.000173792	56
chr15	85165505	85165505	-	1.12001e-07	0.000366396	-53.7037
chr15	85495479	85495479	+	3.17757e-06	0.00277831	-52.5641
chr15	85706787	85706787	+	0.000257404	0.0318665	52.4544
chr15	85725008	85725008	+	5.21357e-06	0.00369787	51.7241
chr15	86461372	86461372	+	1.84498e-08	0.000124527	63.7566
chr15	86604870	86604870	+	1.94404e-06	0.00208692	53.3333
chr15	87329635	87329635	+	8.33492e-07	0.001262	-51.7241
chr15	87552745	87552745	-	5.02742e-08	0.000224781	55.5556
chr15	87666944	87666944	+	1.83638e-12	2.0041e-07	69.4286
chr15	87702932	87702932	-	1.03996e-11	8.16674e-07	78.2915
chr15	87711915	87711915	-	6.00333e-07	0.00103199	52.6083
chr15	87837561	87837561	+	4.46831e-08	0.000209407	51.6129
chr15	88368341	88368341	-	1.06613e-05	0.00554118	-52.3297
chr15	88710081	88710081	+	8.29526e-06	0.00479997	50.3676
chr15	88800766	88800766	-	1.0873e-08	8.96543e-05	-61.5385
chr15	89924868	89924868	+	2.40153e-05	0.00882283	-53.6199
chr15	90909854	90909854	-	7.52551e-07	0.00119039	-63.1765
chr15	91584441	91584441	-	2.33624e-05	0.00868714	-55.5556
chr15	91759945	91759945	+	1.39577e-05	0.00646693	53.5778
chr15	91998931	91998931	-	1.70093e-11	1.09763e-06	53.0154
chr15	92049113	92049113	+	0.000476665	0.0439966	51.875
chr15	92395397	92395397	+	3.4807e-08	0.000181538	61.8776
chr15	92907231	92907231	+	4.57363e-05	0.0126063	50.1425
chr15	93465915	93465915	-	3.59801e-05	0.0110382	51.7241
chr15	93663968	93663968	+	1.45803e-06	0.00175623	-51.7241
chr15	94325268	94325268	+	1.175e-09	2.15037e-05	70
chr15	94418375	94418375	-	4.09323e-08	0.000198731	53.5714
chr15	94776767	94776767	-	4.04716e-09	4.89156e-05	56.1877
chr15	94821791	94821791	-	1.64536e-07	0.000467311	-57.5
chr15	95805916	95805916	+	1.35809e-05	0.00636769	51.0823
chr15	96517754	96517754	+	2.25547e-06	0.00228333	60.7843
chr15	96767103	96767103	+	7.23781e-07	0.00116348	-51.9697
chr15	98029866	98029866	-	2.59106e-07	0.000619111	-51.8519
chr15	99142105	99142105	+	1.1406e-08	9.24576e-05	62.963
chr15	99534785	99534785	+	9.0864e-07	0.00132784	56.7568
chr15	100096402	100096402	-	3.06374e-05	0.0101196	53.9785
chr15	100702970	100702970	-	1.45111e-06	0.00175088	51.0238
chr15	100709665	100709665	-	3.92168e-06	0.00314933	51.6129
chr15	101056035	101056035	-	6.53923e-06	0.00420702	58.9286
chr15	101093787	101093787	+	5.10712e-11	2.39875e-06	54.3478
chr15	101287062	101287062	+	1.66376e-06	0.00190245	-53.8462
chr15	101319491	101319491	+	1.55839e-10	5.50711e-06	55
chr15	101427080	101427080	-	0.000102146	0.0194699	52.2774
chr15	101847032	101847032	-	1.22067e-07	0.0003874	-54.1667
chr15	101904554	101904554	+	4.74338e-07	0.00089604	-52.381
chr15	102021576	102021576	+	2.17176e-05	0.00833102	-51.7241
chr15	102054847	102054847	+	3.48648e-08	0.000181631	66.6667
chr15	102394558	102394558	+	8.01418e-07	0.0012303	53.289
chr15	103224914	103224914	-	3.24047e-08	0.000174813	53.5714
chr15	103376557	103376557	+	6.94029e-07	0.00113171	-52.381
chr16	4033796	4033796	-	6.85973e-08	0.000272518	52.013
chr16	4389755	4389755	-	2.59509e-05	0.0092178	-52.381
chr16	5478786	5478786	-	8.56065e-06	0.00489043	-51.2255
chr16	5600943	5600943	+	2.21448e-05	0.00842111	-58.6667
chr16	5648723	5648723	-	0.000173902	0.0259094	52.2409
chr16	6311840	6311840	-	1.31389e-08	9.99007e-05	50.2451
chr16	6343149	6343149	-	2.72855e-08	0.00015651	68.1818
chr16	6416016	6416016	+	2.75484e-07	0.000643901	54.6429
chr16	7036746	7036746	-	2.58776e-07	0.000618882	-57.0991
chr16	7048841	7048841	+	4.04309e-06	0.00320341	52.9167
chr16	7468382	7468382	+	2.41266e-08	0.000144741	59.4595
chr16	8588208	8588208	-	3.43821e-07	0.00073957	62.3932
chr16	9057279	9057279	+	2.90662e-05	0.00981848	56.7442
chr16	9087774	9087774	-	1.88319e-06	0.00204693	-53.5088
chr16	9090189	9090189	+	1.2043e-05	0.00594726	-52.6786
chr16	9322015	9322015	-	1.61595e-05	0.00703868	-50.4762
chr16	9333467	9333467	+	1.62986e-09	2.64958e-05	63.3333
chr16	9387410	9387410	+	3.81938e-06	0.00310006	51.0684
chr16	9527356	9527356	+	2.86767e-11	1.61221e-06	62.069
chr16	9649691	9649691	+	1.12352e-06	0.00150691	58.6207
chr16	10293113	10293113	-	2.57826e-06	0.00247186	-59.0909
chr16	10349269	10349269	+	1.27115e-07	0.000396524	-50.6239
chr16	10422418	10422418	+	4.23873e-09	5.05315e-05	-60
chr16	10459844	10459844	-	7.12547e-06	0.00441754	53.6298
chr16	10497231	10497231	-	1.06956e-06	0.00146186	55.5556
chr16	10718309	10718309	+	3.50266e-07	0.000748551	57.6923
chr16	10870634	10870634	-	1.94073e-05	0.00781108	52.1739
chr16	10882404	10882404	+	8.31365e-06	0.00480798	60.8333
chr16	11595946	11595946	-	9.78824e-05	0.019018	-52.6515
chr16	11740267	11740267	+	6.52346e-07	0.00108923	-66.6667
chr16	11872914	11872914	-	2.73232e-06	0.00254973	51.3136
chr16	12089615	12089615	+	0.000132617	0.0223894	-51.1364
chr16	12230408	12230408	-	3.91235e-07	0.00079774	51.4286
chr16	12369865	12369865	-	4.01738e-06	0.00319148	55.5556
chr16	12429216	12429216	-	8.2728e-10	1.68431e-05	64.8086
chr16	12456775	12456775	+	2.98881e-05	0.00996256	55.3659
chr16	12476670	12476670	-	6.51338e-06	0.00419494	53.5714
chr16	12880990	12880990	-	1.73602e-06	0.00195291	-61.3821
chr16	14704051	14704051	-	2.16754e-11	1.29787e-06	-55.1724
chr16	15619138	15619138	+	3.97619e-06	0.00316947	56.2963
chr16	16625221	16625221	-	7.21606e-10	1.5522e-05	68.1818
chr16	18483083	18483083	+	8.90504e-09	7.95268e-05	54.4523
chr16	18694301	18694301	+	3.14422e-08	0.000171864	59.7973
chr16	18945476	18945476	-	1.16385e-07	0.000375479	-68.0556
chr16	20349830	20349830	+	0.000114082	0.0206677	-55.2795
chr16	21238142	21238142	+	2.58764e-05	0.00919803	-54.1667
chr16	21273020	21273020	+	3.54712e-08	0.000182489	-55.1724
chr16	21413222	21413222	-	8.53524e-09	7.80112e-05	60.7143
chr16	21903826	21903826	+	1.05187e-06	0.00144904	-54.3137
chr16	22430629	22430629	+	8.40235e-08	0.000306786	58.3972
chr16	22562198	22562198	-	4.4836e-07	0.000865472	50.5435
chr16	22828333	22828333	+	3.74003e-07	0.00077745	51.7241
chr16	23511823	23511823	-	1.27996e-05	0.00615455	-52.3556
chr16	24707024	24707024	+	1.50389e-05	0.00676169	52.2727
chr16	24896103	24896103	-	6.18058e-06	0.00406888	52
chr16	24932615	24932615	-	3.2045e-07	0.00070774	-61.9048
chr16	25312339	25312339	-	1.15205e-05	0.00579663	56.7447
chr16	26096182	26096182	-	6.78677e-08	0.000270634	-51.1074
chr16	28957826	28957826	-	2.30153e-06	0.00231105	-62.7329
chr16	28977475	28977475	+	1.48157e-06	0.0017755	-50.5556
chr16	29297554	29297554	+	2.47346e-05	0.00897919	53.2091
chr16	29385140	29385140	-	2.31371e-08	0.00014158	53.4884
chr16	29544828	29544828	+	5.06808e-06	0.00363932	-52.1739
chr16	29776916	29776916	-	4.66114e-08	0.000214594	-54.7038
chr16	29777464	29777464	-	1.85842e-06	0.00202904	65.3846
chr16	29950199	29950199	-	8.43512e-11	3.50686e-06	-60.5263
chr16	30240007	30240007	+	0.000102672	0.0195306	-55.2995
chr16	30594736	30594736	-	7.14695e-07	0.0011533	54.5455
chr16	31025399	31025399	+	8.8329e-06	0.00498229	53.8462
chr16	31034555	31034555	+	2.06961e-06	0.00216426	55.2381
chr16	31296968	31296968	+	1.14896e-05	0.00579334	51.6129
chr16	31422949	31422949	+	3.65151e-05	0.0111208	-56.401
chr16	31474776	31474776	-	1.54361e-07	0.000448979	-50.061
chr16	31600599	31600599	-	1.70448e-05	0.00726582	59.0476
chr16	31606098	31606098	+	3.17215e-08	0.000172776	57.8236
chr16	31804806	31804806	+	3.33604e-07	0.000726256	-57.9221
chr16	31966707	31966707	-	2.06389e-06	0.00216102	-50.1894
chr16	32056934	32056934	+	3.03089e-07	0.00068543	-55.0877
chr16	32142532	32142532	-	2.58245e-08	0.000151089	60.9756
chr16	33599356	33599356	-	1.51718e-05	0.00679299	-54.4144
chr16	33642154	33642154	+	0.0001121	0.0204652	50.2331
chr16	33699736	33699736	+	1.69744e-06	0.0019253	-53.5714
chr16	34263187	34263187	+	4.84747e-06	0.00354687	51.5152
chr16	35417714	35417714	+	8.60367e-06	0.00490575	56.0606
chr16	35473150	35473150	-	5.03407e-08	0.000224981	56.25
chr16	37940285	37940285	-	3.59779e-07	0.000761765	-52.7334
chr16	38326156	38326156	+	2.30413e-06	0.00231319	56.2338
chr16	38626359	38626359	-	4.55476e-08	0.000211323	56
chr16	38970976	38970976	+	1.67928e-07	0.000471689	61.0233
chr16	39082409	39082409	+	2.05182e-11	1.26889e-06	67.2454
chr16	42711578	42711578	+	4.01201e-08	0.000196626	-53.8462
chr16	44126576	44126576	-	2.21835e-06	0.0022632	-53.8462
chr16	44466264	44466264	-	1.61702e-09	2.64026e-05	59.6757
chr16	45730159	45730159	-	1.2333e-05	0.00602787	60
chr16	46567456	46567456	-	1.46198e-06	0.00175898	-58.8177
chr16	47096938	47096938	+	4.69267e-06	0.00347834	52
chr16	47327733	47327733	-	6.13205e-05	0.0147655	-52.381
chr16	48237650	48237650	-	5.22973e-07	0.000951578	-60
chr16	48574124	48574124	+	6.14575e-08	0.000255435	-56.0976
chr16	48740425	48740425	+	1.36565e-06	0.00168819	56.4562
chr16	50053917	50053917	-	9.16732e-06	0.00509673	55.5556
chr16	50314025	50314025	+	8.34291e-08	0.000305925	-65.2778
chr16	50605357	50605357	+	1.60595e-05	0.00701396	50.6397
chr16	50605528	50605528	+	0.000273064	0.0328075	-52.4064
chr16	52657312	52657312	+	4.34245e-05	0.0122245	51.9231
chr16	56342606	56342606	-	1.48003e-08	0.000108375	53.125
chr16	56416184	56416184	-	6.89528e-06	0.00433646	55.2995
chr16	57050514	57050514	+	4.01738e-06	0.00319148	-55.5556
chr16	57240425	57240425	-	2.55226e-05	0.00913343	-52.1429
chr16	57355552	57355552	+	1.7223e-07	0.000479779	-53.6111
chr16	58542104	58542104	-	1.16202e-05	0.00582507	56.25
chr16	61108741	61108741	+	1.79207e-09	2.82658e-05	60
chr16	62754054	62754054	-	8.03024e-08	0.000298936	-58.0952
chr16	63379226	63379226	-	9.11781e-06	0.00508055	-60.625
chr16	65563706	65563706	+	0.000110622	0.0203528	57.197
chr16	66933557	66933557	+	7.41763e-06	0.00450335	54.8387
chr16	69629456	69629456	+	8.26218e-09	7.65598e-05	68.75
chr16	70089110	70089110	-	7.15403e-07	0.00115389	51.7436
chr16	72185688	72185688	-	1.74238e-06	0.00195587	-51.0465
chr16	72357418	72357418	-	2.22817e-06	0.00226819	52.3657
chr16	73908295	73908295	+	3.5128e-08	0.000181786	60
chr16	74716447	74716447	-	1.46276e-05	0.00665392	-56.4103
chr16	75345356	75345356	-	1.60545e-07	0.000460629	54.5455
chr16	76098757	76098757	+	3.13043e-07	0.000699504	-59.2593
chr16	76118376	76118376	+	5.17333e-05	0.0134627	50.3968
chr16	76122820	76122820	+	5.56336e-06	0.0038304	-63.6364
chr16	77623195	77623195	-	1.58342e-07	0.000456514	-53.8462
chr16	77746624	77746624	-	3.5128e-08	0.000181786	60
chr16	78079992	78079992	+	8.24078e-09	7.64919e-05	69.5652
chr16	79022873	79022873	-	0.00024306	0.0309471	50.7586
chr16	80937298	80937298	+	3.26131e-08	0.000175443	-56.3985
chr16	81703302	81703302	-	6.06759e-07	0.00103931	-54.2857
chr16	82327368	82327368	-	3.34024e-09	4.32894e-05	55.3261
chr16	85912218	85912218	-	9.53057e-09	8.28184e-05	-55.5556
chr16	87563122	87563122	-	4.63461e-06	0.00345517	57.2222
chr16	87839099	87839099	-	3.41378e-07	0.000736238	55.3191
chr16	88367438	88367438	+	1.2667e-06	0.00161428	-57.5893
chr16	88412826	88412826	-	9.15215e-10	1.80395e-05	58.8417
chr16	88521483	88521483	-	3.37465e-06	0.00287943	61.1559
chr16	88764218	88764218	+	6.961e-06	0.00436356	50.3876
chr16	89178202	89178202	+	2.02511e-05	0.00801571	52.381
chr16	89556246	89556246	+	4.35674e-06	0.00334125	-56.5217
chr16	89694760	89694760	-	1.70075e-06	0.00192692	51.4286
chr16	90698610	90698610	-	1.18082e-09	2.15836e-05	50.1949
chr16	90869339	90869339	-	2.60679e-06	0.00248298	51.8519
chr16	91298406	91298406	+	4.19141e-07	0.000830986	51.8519
chr16	91693355	91693355	-	3.49504e-08	0.000181758	60.5263
chr16	92454118	92454118	+	9.33955e-06	0.00514622	51.7241
chr16	93116282	93116282	+	4.24153e-07	0.000838036	59.838
chr16	93210814	93210814	+	6.37505e-09	6.47633e-05	-51.7241
chr16	93328914	93328914	+	8.01296e-09	7.50342e-05	57.094
chr16	93334335	93334335	+	1.01588e-05	0.00540499	-55.1724
chr16	93412654	93412654	-	1.76056e-06	0.00196535	55.3257
chr16	93867959	93867959	+	1.59009e-08	0.000112758	-57.1429
chr16	95158409	95158409	+	3.08705e-05	0.0101525	-53.7143
chr16	95239740	95239740	+	1.52385e-05	0.0068083	51.0638
chr16	95439707	95439707	-	4.7698e-08	0.000217761	-59.2593
chr16	95620868	95620868	+	1.80806e-07	0.00049481	-62.8289
chr16	95759007	95759007	+	1.9998e-09	3.0677e-05	71.1111
chr16	96031433	96031433	+	9.13828e-07	0.00133259	-57.4275
chr16	97683364	97683364	-	1.13691e-07	0.000369937	-52.0148
chr16	97729632	97729632	+	0.000102672	0.0195306	55.2995
chr17	4295280	4295280	-	3.93085e-06	0.00315356	54.1667
chr17	4753814	4753814	+	5.71764e-07	0.00100097	52.7629
chr17	4755617	4755617	-	3.14866e-09	4.14071e-05	-54.5455
chr17	5201735	5201735	-	1.83444e-09	2.866e-05	55.4167
chr17	6026468	6026468	-	1.52625e-06	0.00180718	54.9059
chr17	6416004	6416004	+	1.0919e-05	0.00561622	-52
chr17	7035610	7035610	-	4.09014e-07	0.000820586	54.7138
chr17	7391284	7391284	+	1.42489e-07	0.000426465	52.5
chr17	7391942	7391942	+	4.3826e-07	0.000853187	59.2593
chr17	7651463	7651463	-	1.94442e-08	0.000128779	55.7447
chr17	7666820	7666820	-	2.21424e-07	0.00056101	56.5217
chr17	7898115	7898115	-	1.23612e-06	0.00159411	59.2593
chr17	7942251	7942251	+	4.13755e-07	0.000824848	59.9839
chr17	8245472	8245472	+	1.87006e-05	0.00764891	-55.641
chr17	8370972	8370972	+	8.93467e-08	0.000318595	57.9034
chr17	8436108	8436108	+	3.56836e-09	4.52793e-05	56.9639
chr17	9328826	9328826	+	1.94325e-08	0.000128779	-61.5385
chr17	9483867	9483867	-	5.21916e-06	0.00370036	53.5714
chr17	9685914	9685914	+	6.66723e-08	0.000268046	-72.5543
chr17	10025644	10025644	-	8.98398e-05	0.0181504	50.0645
chr17	10406269	10406269	+	9.54613e-06	0.0052118	57.1429
chr17	11635317	11635317	-	1.05909e-05	0.00552626	-59.9206
chr17	11893017	11893017	-	3.63137e-06	0.00300379	-50.3571
chr17	12032121	12032121	-	1.75206e-06	0.00196214	51.4286
chr17	12658638	12658638	+	2.46557e-06	0.00240784	54.386
chr17	12721806	12721806	+	1.46545e-05	0.00666009	52.1739
chr17	12995163	12995163	-	9.91821e-05	0.0191683	-50.0701
chr17	13506755	13506755	-	1.40774e-11	1.00451e-06	-57.8947
chr17	13885710	13885710	+	8.48872e-06	0.00486995	57.371
chr17	13913730	13913730	+	4.69267e-06	0.00347834	-52
chr17	14177532	14177532	+	9.18005e-07	0.00133729	56.6667
chr17	14768336	14768336	-	1.1075e-07	0.000363181	55.8824
chr17	14877372	14877372	-	6.81153e-06	0.0043077	53.545
chr17	15429067	15429067	-	1.26287e-08	9.79027e-05	60
chr17	15697622	15697622	+	2.83831e-09	3.84717e-05	-58.0645
chr17	17314162	17314162	+	1.86041e-07	0.000504152	50.3968
chr17	17496911	17496911	+	6.2095e-09	6.38242e-05	-61.5385
chr17	17565929	17565929	-	1.27742e-08	9.84402e-05	51.4286
chr17	19896757	19896757	+	3.63423e-07	0.000764869	-56.3593
chr17	22182050	22182050	+	5.59612e-09	6.02745e-05	70.1426
chr17	23987646	23987646	-	2.43241e-05	0.00888974	-53.125
chr17	24191861	24191861	+	2.35846e-08	0.000143184	52
chr17	24728845	24728845	+	2.92244e-08	0.000163064	-56.8182
chr17	24829597	24829597	+	0.000148517	0.023825	-52.8696
chr17	25464429	25464429	-	7.25106e-07	0.00116424	-54.5455
chr17	25992683	25992683	+	7.73961e-12	6.52683e-07	-70.3704
chr17	26526329	26526329	-	2.50096e-08	0.00014772	52.5039
chr17	27448107	27448107	-	0.000210157	0.0286956	52.139
chr17	27653093	27653093	-	5.95312e-07	0.00102586	-52.957
chr17	27811393	27811393	+	3.9695e-08	0.000195786	53.8095
chr17	28145155	28145155	+	4.01266e-08	0.000196626	55.8824
chr17	28779941	28779941	+	5.68285e-06	0.00388581	-51.2121
chr17	29203444	29203444	+	7.70233e-06	0.00460889	51.4286
chr17	30693224	30693224	-	7.31731e-05	0.0162691	52
chr17	31382437	31382437	+	1.66188e-05	0.00715298	-54.5455
chr17	31719450	31719450	+	1.11225e-06	0.00149844	57.5758
chr17	31876028	31876028	+	6.7464e-08	0.000270115	-53.0891
chr17	32148068	32148068	+	1.18226e-07	0.000378788	56.6667
chr17	32227084	32227084	-	3.6299e-08	0.000184568	60.8696
chr17	33567842	33567842	+	6.77769e-09	6.7559e-05	61.1111
chr17	33783614	33783614	-	5.36501e-07	0.000964088	51.8519
chr17	34147030	34147030	+	1.21603e-10	4.54621e-06	-51.4286
chr17	34796308	34796308	+	2.49912e-06	0.00242623	-52.9412
chr17	34856267	34856267	-	5.8993e-08	0.000248674	54.8387
chr17	35133447	35133447	-	6.35042e-07	0.00107137	51.7241
chr17	35420458	35420458	-	4.16395e-07	0.000827773	-52.4406
chr17	35763590	35763590	-	1.67802e-07	0.000471515	-53.125
chr17	35913997	35913997	-	1.35959e-06	0.00168331	-54.8352
chr17	36089333	36089333	+	1.34675e-05	0.00633991	53.6559
chr17	36464170	36464170	-	1.16748e-06	0.0015382	51.4071
chr17	36501156	36501156	+	8.25326e-06	0.00478425	-53.3333
chr17	36814479	36814479	-	1.97489e-06	0.00210647	50.2584
chr17	38632386	38632386	+	1.76346e-09	2.78738e-05	59.5745
chr17	38982874	38982874	-	4.12368e-05	0.0118998	-55.5831
chr17	39283723	39283723	+	4.93055e-09	5.54813e-05	-56.25
chr17	43111231	43111231	-	1.08283e-07	0.000358099	53.5714
chr17	43366318	43366318	-	7.92164e-05	0.016953	54.1667
chr17	43573633	43573633	+	5.7126e-06	0.00389969	52.0833
chr17	43946407	43946407	+	2.33783e-08	0.00014244	-59.3162
chr17	43949167	43949167	+	8.29439e-08	0.000305096	55.814
chr17	44237864	44237864	+	3.93749e-06	0.00315554	56.6667
chr17	44660718	44660718	-	1.03821e-05	0.0054625	55.7173
chr17	45054535	45054535	-	1.05401e-07	0.000353541	-54.8387
chr17	45262368	45262368	+	3.01662e-06	0.00269712	51.6129
chr17	45363673	45363673	+	5.41852e-05	0.0138105	50.641
chr17	45828105	45828105	-	4.77998e-07	0.00090066	55.1829
chr17	46101863	46101863	-	3.74851e-08	0.000188852	51.3858
chr17	47243215	47243215	+	6.73662e-07	0.00110977	50.3222
chr17	47765736	47765736	-	3.03788e-05	0.0100734	-50.6394
chr17	47878667	47878667	-	9.38727e-08	0.000328989	-51.6129
chr17	47918210	47918210	+	3.97452e-06	0.00316914	50.3497
chr17	47941000	47941000	+	1.04451e-08	8.76992e-05	-58.9744
chr17	48302412	48302412	-	1.35336e-08	0.000101808	-57.6389
chr17	48884298	48884298	-	3.60837e-10	9.64969e-06	-60
chr17	48974006	48974006	+	4.62837e-09	5.31693e-05	54.7588
chr17	50056714	50056714	-	6.11289e-06	0.00404513	-58.1098
chr17	50729368	50729368	+	3.43841e-06	0.00291136	60
chr17	50896523	50896523	-	1.73079e-07	0.000480865	-59.5238
chr17	51115924	51115924	-	2.58764e-05	0.00919803	-54.1667
chr17	51680101	51680101	+	4.62738e-06	0.00345195	-52.381
chr17	51754273	51754273	+	1.82384e-09	2.85846e-05	-71.4286
chr17	51793174	51793174	-	1.83679e-06	0.00201343	58.2707
chr17	52107410	52107410	+	6.1856e-07	0.00105308	-56.6667
chr17	53652760	53652760	-	7.95202e-07	0.00122674	58.8235
chr17	56284772	56284772	+	2.37608e-06	0.00235391	-63.4091
chr17	60203581	60203581	+	4.07327e-06	0.00321763	54.5455
chr17	61050538	61050538	-	4.91792e-06	0.00357897	51.7598
chr17	61596462	61596462	+	2.6037e-07	0.000620197	58.0645
chr17	61934954	61934954	+	2.12712e-07	0.000546399	-54.7038
chr17	62509294	62509294	+	1.00669e-05	0.00537596	-52.3016
chr17	62574764	62574764	-	2.28024e-07	0.000570431	50.7177
chr17	62709778	62709778	+	1.12042e-06	0.00150519	62.5
chr17	62782228	62782228	-	1.32412e-06	0.00165877	-63.3333
chr17	62849676	62849676	+	1.99169e-07	0.000524781	54.5946
chr17	63187749	63187749	+	1.61858e-10	5.65251e-06	54.7436
chr17	63719809	63719809	+	7.39234e-07	0.00117797	51.9444
chr17	64478770	64478770	+	2.58764e-05	0.00919803	-54.1667
chr17	64698079	64698079	-	2.16209e-08	0.0001365	-53.3333
chr17	64822476	64822476	+	2.17788e-10	6.9486e-06	-51.4733
chr17	65946547	65946547	+	8.13881e-08	0.000301993	51.1628
chr17	67281475	67281475	+	4.84003e-06	0.00354432	-51.8648
chr17	67612681	67612681	-	1.43088e-05	0.00656917	51.1512
chr17	67915946	67915946	-	4.21619e-05	0.0120482	-55.5024
chr17	69634595	69634595	-	3.07761e-09	4.07115e-05	-53.5714
chr17	69664233	69664233	-	3.4606e-06	0.00291999	51.6304
chr17	70175665	70175665	+	1.74576e-05	0.00737194	50.1504
chr17	71299859	71299859	-	2.17229e-07	0.000555407	65.4945
chr17	71518094	71518094	-	3.06572e-07	0.000690691	-53.5714
chr17	72362083	72362083	+	1.54651e-09	2.57615e-05	72
chr17	72639907	72639907	-	1.10333e-12	1.33136e-07	60.4651
chr17	72780478	72780478	+	1.00647e-06	0.00141359	-52
chr17	72794612	72794612	+	1.65143e-08	0.000115458	-65.7143
chr17	73132892	73132892	+	9.44682e-09	8.24692e-05	62.7907
chr17	73296344	73296344	+	2.71775e-06	0.00254431	51.1307
chr17	74433631	74433631	+	2.15498e-11	1.29787e-06	72.5
chr17	75181998	75181998	+	0.000325601	0.0360234	-51.5217
chr17	75838964	75838964	-	2.61796e-07	0.000622892	61.2981
chr17	76374215	76374215	-	2.37833e-10	7.30942e-06	-68.5714
chr17	78416235	78416235	-	1.26028e-06	0.00161041	52.381
chr17	79523528	79523528	+	9.78824e-05	0.019018	-52.6515
chr17	79789270	79789270	-	5.95737e-08	0.000250623	55.8474
chr17	79986513	79986513	+	2.72742e-06	0.0025478	-64.2857
chr17	80382005	80382005	+	2.22911e-11	1.32149e-06	-74.2733
chr17	82875839	82875839	-	1.58103e-10	5.57383e-06	-60.4167
chr17	83132668	83132668	+	1.06169e-08	8.84768e-05	-56.4103
chr17	83239846	83239846	+	7.30838e-07	0.001169	54.1118
chr17	83733675	83733675	+	1.41812e-07	0.000426071	50.9926
chr17	83829200	83829200	+	5.56771e-07	0.000985605	-53.8462
chr17	83893249	83893249	+	9.73247e-06	0.00527076	57.1895
chr17	84115326	84115326	-	9.62748e-09	8.33986e-05	53.6585
chr17	84701642	84701642	+	8.13258e-06	0.00474972	-58.3333
chr17	84838505	84838505	-	1.63151e-06	0.00187961	-50.6306
chr17	84887852	84887852	-	7.84574e-09	7.42649e-05	51.7857
chr17	85240332	85240332	-	6.26495e-07	0.00106196	-63.8344
chr17	85396336	85396336	+	1.58166e-08	0.000112375	-65.3846
chr17	85407403	85407403	+	3.17215e-08	0.000172776	56.8279
chr17	85495538	85495538	+	2.78452e-05	0.00959402	-50.5128
chr17	85813338	85813338	+	3.39213e-06	0.00288717	-53.38
chr17	86822456	86822456	+	3.53706e-11	1.85376e-06	50.7463
chr17	86911494	86911494	+	1.08562e-07	0.000358544	60
chr17	87469681	87469681	+	0.000114894	0.0207577	56.7273
chr17	88257342	88257342	+	2.82669e-07	0.000654917	-56.5217
chr17	88324637	88324637	+	0.000238864	0.0306592	-53.2174
chr17	88903238	88903238	-	6.59016e-07	0.00109461	55
chr17	89118768	89118768	-	5.15624e-08	0.000228378	-51.2195
[truncated: 2,686 more rows]

## Sheet: mCHA (= mCCA, mCAA, and mCTA)
CHR	start	end	strand	P value	Q value	% Diff
chr1	4145800	4145800	-	2.86117e-09	7.64734e-05	-67.5595
chr1	11086083	11086083	-	3.53176e-09	8.72984e-05	-70.8333
chr1	12818125	12818125	+	1.56557e-11	1.5095e-06	71.875
chr1	15107526	15107526	+	6.93592e-05	0.0286256	52.2727
chr1	15253270	15253270	-	7.03416e-06	0.00863114	54.1667
chr1	22219051	22219051	+	3.88417e-10	1.91701e-05	-59.2857
chr1	24058783	24058783	+	6.06759e-07	0.00218324	54.2857
chr1	29710480	29710480	-	6.49273e-07	0.00228259	57.6923
chr1	33206100	33206100	+	6.35939e-07	0.00225167	-52.9412
chr1	35955588	35955588	+	9.38604e-10	3.57727e-05	56
chr1	36221442	36221442	+	1.73133e-08	0.0002376	50.02
chr1	39082426	39082426	-	1.97377e-09	6.02737e-05	-57.9545
chr1	39446662	39446662	+	8.15467e-06	0.00938511	53.4975
chr1	42282155	42282155	+	2.13888e-07	0.00116894	-57.6423
chr1	42392431	42392431	+	3.53591e-06	0.00596594	-59.0909
chr1	42681036	42681036	-	1.02959e-06	0.00297606	-61.9048
chr1	43037419	43037419	+	4.9676e-07	0.00196687	52
chr1	43713736	43713736	-	2.3613e-10	1.30099e-05	-58.5366
chr1	44333449	44333449	-	8.70276e-06	0.00968512	-52.7742
chr1	45843135	45843135	+	8.30666e-07	0.00262923	51.3853
chr1	48765023	48765023	+	1.20777e-06	0.00326583	-52.1739
chr1	53995308	53995308	+	1.27904e-07	0.000837376	-54.2857
chr1	55839374	55839374	+	1.01954e-06	0.00296143	54.1667
chr1	55908571	55908571	-	3.04521e-05	0.018796	53.6325
chr1	56179979	56179979	+	4.46831e-08	0.000442295	51.6129
chr1	57944649	57944649	+	7.73844e-07	0.00254122	-59.1667
chr1	62871386	62871386	+	5.39145e-08	0.000496834	-58.7419
chr1	63517765	63517765	+	7.79731e-06	0.00914873	52.5225
chr1	63920654	63920654	-	2.66381e-08	0.000317015	52.381
chr1	63935999	63935999	-	1.30322e-05	0.0120962	-54.4651
chr1	66825317	66825317	+	5.42509e-08	0.000498611	51.8519
chr1	70626886	70626886	+	5.21357e-06	0.00736283	-51.7241
chr1	71515732	71515732	-	4.67558e-06	0.00694046	52.1421
chr1	72540320	72540320	+	1.73548e-08	0.0002376	56.1404
chr1	73679500	73679500	+	1.83073e-06	0.00411865	-50.3538
chr1	74100404	74100404	-	1.40437e-06	0.00356595	52.9363
chr1	74126564	74126564	+	3.25045e-07	0.0015233	51.2821
chr1	75758532	75758532	-	3.93211e-08	0.000413195	51.5152
chr1	81704270	81704270	+	3.40008e-05	0.0198875	-52.5957
chr1	88210579	88210579	-	2.84754e-07	0.00139736	-64
chr1	89576021	89576021	-	4.83436e-06	0.00707138	59.5402
chr1	89597822	89597822	-	1.00932e-09	3.72704e-05	67.9272
chr1	89792753	89792753	+	2.24842e-05	0.0161171	-54.5455
chr1	90777015	90777015	+	6.14497e-08	0.000535092	60.8696
chr1	90941800	90941800	-	1.79456e-05	0.0143416	52.3349
chr1	95508076	95508076	-	4.01738e-06	0.00641302	-53.8462
chr1	102413190	102413190	+	7.42168e-06	0.00886584	-58.8859
chr1	107494046	107494046	-	8.51221e-06	0.00957023	51.1111
chr1	109613079	109613079	-	5.79962e-06	0.0078168	-55.0388
chr1	112813143	112813143	-	2.1201e-06	0.004479	-51.6667
chr1	114688832	114688832	+	4.50212e-06	0.00680641	-54
chr1	116351756	116351756	+	5.48608e-08	0.000501337	-53.6585
chr1	116913056	116913056	-	4.77197e-07	0.00192034	-72.7273
chr1	117109423	117109423	+	7.07099e-05	0.0289173	50.3722
chr1	118243113	118243113	-	6.6173e-08	0.000559207	-55.4245
chr1	123744016	123744016	-	9.01209e-11	6.20017e-06	-62.9032
chr1	124061977	124061977	-	2.15106e-08	0.000274503	61.553
chr1	124351419	124351419	+	1.97756e-06	0.00430785	51.8519
chr1	125775291	125775291	+	2.19915e-06	0.0045627	-53.3333
chr1	126543343	126543343	+	3.78371e-07	0.00168163	-51.8367
chr1	128392595	128392595	+	2.25437e-05	0.0161207	58.3333
chr1	129266279	129266279	+	1.63004e-07	0.000980326	-52.381
chr1	131605088	131605088	+	7.13593e-07	0.00241888	55.7423
chr1	132184687	132184687	+	4.7864e-10	2.27759e-05	-53.8462
chr1	132794281	132794281	+	9.02255e-06	0.00988349	51.6892
chr1	133186054	133186054	-	1.80009e-08	0.000242378	55.0769
chr1	135339262	135339262	-	7.97253e-06	0.0092725	50.4944
chr1	136054613	136054613	-	1.16901e-06	0.00321447	-51.2821
chr1	136620649	136620649	+	5.75337e-08	0.000513341	-65.0588
chr1	138113489	138113489	-	1.3049e-07	0.000847421	56.4286
chr1	138956733	138956733	+	1.28501e-06	0.00336377	60.0733
chr1	139082422	139082422	-	5.02767e-07	0.00197642	63.4921
chr1	141873992	141873992	-	3.85576e-05	0.0212482	56
chr1	146358897	146358897	-	3.40355e-07	0.00156822	-66.6667
chr1	147444400	147444400	-	4.18832e-06	0.00654397	-56.4935
chr1	148102096	148102096	+	2.64918e-06	0.00508132	-50.2679
chr1	150304346	150304346	-	4.92471e-09	0.000107734	-59.6154
chr1	152164024	152164024	-	7.64707e-05	0.0301152	-52.3188
chr1	154254686	154254686	-	1.17435e-05	0.0114427	52.2222
chr1	156259659	156259659	+	5.86254e-06	0.0078599	-54.232
chr1	158402105	158402105	+	2.48054e-05	0.0169273	52.0161
chr1	162041504	162041504	+	2.08868e-16	4.43875e-11	60.8909
chr1	162307258	162307258	+	7.23581e-10	3.00543e-05	62.5
chr1	162377232	162377232	+	6.89787e-07	0.00236747	51.8519
chr1	162414286	162414286	-	1.95617e-07	0.00110587	51.5152
chr1	162652011	162652011	-	0.000145724	0.0417249	51.6667
chr1	163066461	163066461	-	1.26826e-05	0.0119137	50.5792
chr1	165539379	165539379	+	7.0946e-05	0.0289466	56
chr1	170320950	170320950	-	6.16216e-09	0.000126066	55.276
chr1	171577092	171577092	-	2.52204e-08	0.000303965	-56.7568
chr1	172452878	172452878	-	2.27911e-05	0.0162054	55.3333
chr1	173737145	173737145	-	6.72431e-08	0.000564708	55.1957
chr1	173811546	173811546	-	1.23814e-07	0.000821386	56.5611
chr1	174046908	174046908	-	2.27726e-07	0.00121359	53.8261
chr1	174738603	174738603	-	7.93318e-12	8.42958e-07	84.6429
chr1	174738652	174738652	-	2.12405e-06	0.00448281	52
chr1	174894072	174894072	+	1.61582e-07	0.00097485	70
chr1	177941507	177941507	+	4.9452e-07	0.00195952	-68.1818
chr1	179572035	179572035	+	2.3566e-07	0.00124378	61.5245
chr1	180859650	180859650	-	1.09316e-08	0.000178703	-56.5217
chr1	181412598	181412598	-	3.08849e-08	0.000350339	-56.1331
chr1	181546358	181546358	-	1.05036e-07	0.000739028	-54.9261
chr1	181669209	181669209	-	9.14264e-07	0.00278972	54.5455
chr1	182200183	182200183	+	9.50477e-07	0.00285395	-50.1331
chr1	182218419	182218419	+	3.93085e-06	0.0063406	-54.1667
chr1	183242211	183242211	+	6.02229e-13	8.70991e-08	-52.1127
chr1	184234230	184234230	+	1.12229e-10	7.49143e-06	-78.7879
chr1	184892667	184892667	-	1.33802e-11	1.32696e-06	-76.3121
chr1	185251070	185251070	+	2.23087e-07	0.00119745	56.6667
chr1	186152523	186152523	+	1.13745e-13	1.8507e-08	93.3333
chr1	186237030	186237030	-	4.80101e-07	0.00192776	52.1739
chr1	190080636	190080636	-	1.94404e-06	0.00426903	-53.3333
chr1	190193116	190193116	-	4.9781e-09	0.000107734	58.0645
chr1	191678302	191678302	-	6.94865e-07	0.00237628	56.8484
chr1	192135561	192135561	+	1.25275e-07	0.00082641	52.5
chr1	192938129	192938129	+	1.37178e-05	0.0124402	52.967
chr1	194148133	194148133	-	1.66376e-06	0.00391528	53.8462
chr10	3735358	3735358	-	8.23016e-07	0.00261767	56.7627
chr10	6988630	6988630	+	2.28123e-08	0.000283811	55.8943
chr10	8256701	8256701	+	2.75161e-06	0.00517442	-52
chr10	10580655	10580655	+	0.00012036	0.0378422	-51.0417
chr10	18067278	18067278	-	1.55437e-06	0.00376244	55.3043
chr10	26491802	26491802	-	7.91022e-07	0.0025699	-62.1154
chr10	27029061	27029061	-	3.41751e-10	1.72754e-05	-69.0476
chr10	28027745	28027745	-	1.57626e-08	0.000226087	-60
chr10	29341410	29341410	+	2.46573e-06	0.00487584	52.7149
chr10	33732882	33732882	-	8.47917e-05	0.0317484	-53.8462
chr10	36401921	36401921	-	5.57806e-05	0.0256065	-54.2735
chr10	37843469	37843469	+	9.0522e-06	0.00990464	-53.1797
chr10	40924217	40924217	+	1.83277e-09	5.73312e-05	68.1818
chr10	41975375	41975375	+	4.88867e-12	5.53334e-07	63.8889
chr10	44163363	44163363	+	7.34611e-10	3.03558e-05	76.2605
chr10	44374803	44374803	-	0.000115148	0.0370149	-52.381
chr10	44685384	44685384	-	1.51613e-06	0.00371652	-52.1739
chr10	44984208	44984208	-	3.64107e-07	0.00164064	54.0351
chr10	45012838	45012838	-	1.62155e-07	0.00097717	67.8571
chr10	46466030	46466030	-	1.88841e-05	0.0146856	55.3846
chr10	48404556	48404556	-	7.95424e-06	0.00925845	51.3514
chr10	49134118	49134118	+	8.05664e-10	3.25176e-05	-56.25
chr10	50289011	50289011	+	1.9639e-06	0.00429175	59.375
chr10	51338668	51338668	-	5.77627e-07	0.00213219	-54.5455
chr10	52986124	52986124	-	1.83306e-05	0.0144213	-52.1739
chr10	60864634	60864634	-	3.29594e-07	0.00153494	-57.1429
chr10	62161745	62161745	+	5.50036e-11	4.2427e-06	53.6585
chr10	62746669	62746669	-	4.02181e-08	0.000417547	-55
chr10	63181489	63181489	+	1.08283e-07	0.000751214	-53.5714
chr10	64277233	64277233	-	6.48052e-07	0.0022806	54.3828
chr10	64694653	64694653	-	1.51028e-06	0.00371179	53.003
chr10	67451792	67451792	+	6.48414e-05	0.0276815	52.5253
chr10	67773354	67773354	-	7.22196e-07	0.0024401	61.7647
chr10	70939958	70939958	+	4.46831e-08	0.000442295	-51.6129
chr10	71033362	71033362	-	7.89998e-08	0.000625065	-53.7567
chr10	71216205	71216205	-	3.51507e-08	0.000381693	51.6129
chr10	73701559	73701559	+	4.60854e-06	0.00689012	55.5556
chr10	74403206	74403206	+	4.22284e-05	0.022309	-53.5191
chr10	74413249	74413249	+	2.33061e-11	2.11036e-06	60
chr10	76334688	76334688	+	4.67763e-09	0.000105658	65.5172
chr10	77142257	77142257	+	7.13973e-10	2.98584e-05	83.2528
chr10	77211181	77211181	+	1.39829e-05	0.0125718	-56
chr10	77318606	77318606	+	1.21059e-05	0.0116325	-52.381
chr10	81342806	81342806	+	3.9954e-08	0.000416466	52.619
chr10	83943821	83943821	+	5.21883e-09	0.000111134	-56.6667
chr10	84723874	84723874	-	1.99932e-06	0.00433196	-58.231
chr10	86184865	86184865	-	2.34712e-09	6.6416e-05	59.5238
chr10	86734588	86734588	-	0.000150207	0.0422511	51.737
chr10	87022279	87022279	-	1.04882e-05	0.0107644	-50.7422
chr10	87787081	87787081	+	3.3344e-08	0.000369506	-57.1429
chr10	89149815	89149815	+	6.93297e-07	0.00237326	-62.8571
chr10	91498775	91498775	-	0.000166204	0.0444207	-50.6757
chr10	92897984	92897984	+	2.34137e-08	0.000289219	-57.1429
chr10	93500763	93500763	+	1.08431e-08	0.000178368	68.9655
chr10	94417638	94417638	-	1.08038e-05	0.0109297	53.3333
chr10	95204438	95204438	+	3.6536e-09	8.92111e-05	-51.5152
chr10	96489135	96489135	-	2.02511e-05	0.0152178	52.381
chr10	97116613	97116613	-	3.68727e-12	4.26626e-07	53.2418
chr10	98486669	98486669	-	1.1846e-05	0.0114869	61
chr10	101482276	101482276	-	2.82669e-07	0.00139276	56.5217
chr10	102880280	102880280	-	5.67688e-06	0.00770696	54.9911
chr10	105688729	105688729	+	5.83931e-06	0.0078486	52.381
chr10	106953044	106953044	+	5.45898e-10	2.46085e-05	-54.5455
chr10	107142676	107142676	+	1.70337e-05	0.0139265	51.8519
chr10	107757133	107757133	-	9.07624e-08	0.000677997	-53.4884
chr10	108441324	108441324	-	1.97994e-07	0.00111156	-56
chr10	112834690	112834690	+	5.21357e-06	0.00736283	51.7241
chr10	113426434	113426434	+	1.4985e-07	0.000928266	55.4902
chr10	116811190	116811190	-	1.65501e-09	5.36883e-05	-56.8627
chr10	117237716	117237716	-	2.2259e-05	0.0160362	-51.8519
chr10	117776222	117776222	+	1.24755e-07	0.000824299	53.8462
chr10	119128597	119128597	-	3.94184e-06	0.00634718	-52.1739
chr10	119964055	119964055	-	7.45214e-06	0.00888897	-52.7778
chr10	120389026	120389026	-	2.90449e-06	0.00535122	58.3333
chr10	120998104	120998104	+	1.52019e-08	0.0002214	56.6667
chr10	124129587	124129587	-	1.33179e-07	0.000856182	56.3265
chr10	124131939	124131939	-	9.39017e-08	0.000692997	75.2525
chr10	125190777	125190777	+	9.74663e-05	0.0340378	-50.2717
chr11	3326769	3326769	-	2.28038e-08	0.000283811	-52.6316
chr11	3985227	3985227	-	5.56361e-08	0.000505101	-72.7273
chr11	5193248	5193248	+	3.10632e-05	0.0189606	-58.3333
chr11	7298137	7298137	-	5.67979e-09	0.000118054	-58.0972
chr11	8441748	8441748	+	3.23863e-09	8.20549e-05	-58.8235
chr11	8637368	8637368	+	1.89132e-05	0.0147009	-52.0325
chr11	10139351	10139351	-	8.40368e-08	0.000647737	69.697
chr11	11700972	11700972	-	1.14615e-07	0.000778446	-53.8462
chr11	12366940	12366940	-	1.03119e-05	0.0106378	51.0367
chr11	18714703	18714703	-	8.4542e-06	0.00953796	56.7888
chr11	18888972	18888972	-	9.57058e-08	0.000699372	60.4633
chr11	24069201	24069201	+	1.48835e-08	0.000217982	-64.4518
chr11	29367785	29367785	-	3.97931e-05	0.0216193	-53.6923
chr11	30495586	30495586	-	3.64408e-06	0.0060638	64.6377
chr11	31431363	31431363	-	7.29409e-07	0.00245573	60
chr11	31755217	31755217	-	7.76143e-05	0.0303532	50.5
chr11	34253820	34253820	-	1.53797e-07	0.00094429	54.7238
chr11	34697056	34697056	-	7.76202e-09	0.000144385	53.8462
chr11	35275937	35275937	+	2.25234e-07	0.00120527	54.6784
chr11	37341020	37341020	+	1.03296e-06	0.00297969	54.8387
chr11	38587622	38587622	+	7.90593e-05	0.0306011	54.7586
chr11	39613949	39613949	+	1.16524e-08	0.000186103	-60.293
chr11	39988255	39988255	-	3.51448e-08	0.000381693	-57.6829
chr11	40836125	40836125	+	3.37832e-06	0.00582051	-56.044
chr11	43396333	43396333	+	1.58309e-11	1.51239e-06	66.6667
chr11	44582867	44582867	+	7.41763e-06	0.00886201	-53.5484
chr11	44968882	44968882	-	1.07561e-08	0.000177505	-71.7172
chr11	45037227	45037227	+	8.04457e-08	0.000631233	62.5
chr11	50767749	50767749	-	3.62168e-08	0.000387277	-51.4286
chr11	51327252	51327252	+	2.92091e-06	0.00536817	56.7766
chr11	53056172	53056172	-	8.02033e-09	0.000147038	61.9048
chr11	53935687	53935687	-	6.00413e-06	0.00797238	56.3492
chr11	54108415	54108415	-	5.51443e-09	0.000115772	57.1429
chr11	54882271	54882271	+	6.38651e-08	0.000545115	65.7143
chr11	57648750	57648750	-	4.77719e-09	0.000106256	-60.7143
chr11	57676118	57676118	-	7.57883e-07	0.00251384	59.4697
chr11	57682852	57682852	-	5.25399e-07	0.00202727	58.6207
chr11	59697509	59697509	-	1.01176e-10	6.84136e-06	69.7491
chr11	60336251	60336251	+	5.21357e-06	0.00736283	51.7241
chr11	62302938	62302938	+	3.97764e-07	0.00172589	60.4464
chr11	63998548	63998548	-	3.01427e-05	0.0186834	53.7647
chr11	64324163	64324163	+	6.7458e-06	0.0084422	-51.1364
chr11	65124554	65124554	+	1.49374e-07	0.000926422	66.6667
chr11	66044861	66044861	+	6.43964e-06	0.00824892	55.5556
chr11	70474135	70474135	-	2.63497e-06	0.00505964	51.3514
chr11	75721150	75721150	+	2.80647e-10	1.48074e-05	-51.9943
chr11	76169846	76169846	+	4.75934e-07	0.00191721	50.8021
chr11	76262310	76262310	+	2.13872e-09	6.30515e-05	-60
chr11	76311846	76311846	+	3.39029e-08	0.000372796	57.5758
chr11	76792686	76792686	-	3.02203e-09	7.9068e-05	-62.2222
chr11	81463821	81463821	-	8.68221e-08	0.000660199	56.6667
chr11	81590262	81590262	-	2.06181e-09	6.19903e-05	59.583
chr11	84550832	84550832	-	1.46819e-08	0.000215332	-51.2821
chr11	85238410	85238410	-	1.28039e-08	0.000195543	59.7434
chr11	85388324	85388324	-	1.69155e-08	0.000235173	58.1522
chr11	85468317	85468317	-	4.34558e-07	0.00181514	-52.6316
chr11	85845804	85845804	-	5.7579e-08	0.000513341	56
chr11	85933051	85933051	+	1.88958e-06	0.00419723	-54.5455
chr11	88435313	88435313	-	3.58476e-09	8.80398e-05	-55.1555
chr11	90748938	90748938	-	4.63764e-07	0.00188791	51.6129
chr11	93558178	93558178	+	6.1863e-06	0.00807056	51.3986
chr11	94247378	94247378	+	2.96255e-05	0.0185494	58.9744
chr11	94383641	94383641	+	7.5666e-06	0.00897922	-53.4677
chr11	95400051	95400051	-	1.11374e-05	0.0110938	-52.1739
chr11	95674371	95674371	-	3.17529e-07	0.00150295	58.8803
chr11	97392838	97392838	+	2.94134e-06	0.00539144	50.1075
chr11	97446726	97446726	-	2.81923e-08	0.000331346	-60.6061
chr11	99048694	99048694	-	2.29074e-09	6.53533e-05	-58.1395
chr11	100746794	100746794	+	3.97834e-05	0.0216193	54.2781
chr11	102178128	102178128	-	2.17735e-05	0.0158543	50.122
chr11	105553424	105553424	+	7.00867e-06	0.00861153	-54.5455
chr11	105972030	105972030	+	9.15401e-07	0.00279211	53.1965
chr11	106159719	106159719	-	4.44169e-05	0.022901	50.9091
chr11	106494388	106494388	+	1.51028e-06	0.00371179	53.8288
chr11	108556285	108556285	-	2.69119e-06	0.0051234	51.3514
chr11	108762116	108762116	+	4.84218e-06	0.00707792	50.7024
chr11	110380245	110380245	+	1.47268e-05	0.0129412	53.5758
chr11	111068650	111068650	-	3.48417e-09	8.7194e-05	53.3333
chr11	111112115	111112115	-	1.0919e-05	0.0109878	52
chr11	112177300	112177300	-	9.11481e-06	0.00994784	-63.8095
chr11	112871686	112871686	-	3.93474e-05	0.0214898	56.3636
chr11	115237655	115237655	-	1.08502e-09	3.97835e-05	57.9178
chr11	116425057	116425057	+	8.77144e-06	0.00972518	53.5088
chr11	117350139	117350139	-	3.55923e-08	0.000383278	-54.5455
chr11	119607780	119607780	-	3.20633e-08	0.000359194	55.8537
chr11	119696415	119696415	-	6.7974e-10	2.89992e-05	54.5455
chr11	120192132	120192132	-	1.76309e-06	0.00404306	-60.582
chr11	120464296	120464296	-	4.51622e-11	3.70302e-06	58.6207
chr11	120500196	120500196	-	3.20053e-08	0.000359194	-53.125
chr11	120857306	120857306	-	3.91235e-07	0.00171177	51.4286
chr11	121219717	121219717	-	7.11843e-11	5.18362e-06	51.5152
chr11	121221691	121221691	+	2.13318e-08	0.000272556	59.7367
chr12	4175040	4175040	-	1.2546e-08	0.000193834	65.7825
chr12	5734963	5734963	+	1.05929e-05	0.0108249	60
chr12	5924409	5924409	+	3.68476e-06	0.00611088	52.381
chr12	7724775	7724775	+	6.88332e-08	0.00056951	-56.25
chr12	8789282	8789282	+	1.59388e-06	0.00382428	-52.9412
chr12	10417070	10417070	+	1.32938e-08	0.000200335	-51.3393
chr12	11221939	11221939	+	2.19202e-08	0.000277688	57.1237
chr12	16270663	16270663	+	1.72376e-07	0.00102279	-54.8002
chr12	16344152	16344152	+	1.27008e-06	0.00334644	-51.5152
chr12	19171246	19171246	-	2.91669e-06	0.00536176	-50.2717
chr12	21544868	21544868	-	1.35379e-07	0.000863279	-52.4359
chr12	25177894	25177894	+	2.78097e-06	0.00520187	58.3333
chr12	29060258	29060258	+	1.79269e-08	0.000242122	-53.6585
chr12	31841555	31841555	-	4.38037e-06	0.00670578	52.7374
chr12	35346437	35346437	-	3.81149e-07	0.00169109	55.4722
chr12	35617468	35617468	-	9.34177e-10	3.57639e-05	75
chr12	36650236	36650236	-	4.76781e-06	0.00701344	-51.0484
chr12	45777885	45777885	-	1.69701e-05	0.0139002	60.9231
chr12	47520658	47520658	-	2.59567e-05	0.0173476	56.5217
chr12	48693959	48693959	+	3.91235e-07	0.00171177	-51.4286
chr12	49952542	49952542	-	1.91625e-07	0.00109178	-54.5
chr12	50414757	50414757	-	1.92295e-06	0.00424258	53.3784
chr12	51156045	51156045	-	6.86152e-06	0.0084969	52.5601
chr12	51167567	51167567	+	1.1735e-07	0.000788889	-53.2279
chr12	51623538	51623538	+	9.92252e-05	0.0343532	-50.2849
chr12	51712639	51712639	-	3.38794e-07	0.00156497	58.0645
chr12	55357150	55357150	+	2.7956e-05	0.0180032	-53.3333
chr12	57480962	57480962	-	3.97014e-06	0.00636854	-52.0444
chr12	60192936	60192936	-	1.00361e-07	0.000719754	53.5188
chr12	62040909	62040909	-	1.06956e-06	0.00303281	55.5556
chr12	62841785	62841785	+	9.69808e-06	0.0102776	51.6129
chr12	63563269	63563269	+	3.57823e-07	0.00161933	61.5385
chr12	64448967	64448967	+	6.01542e-05	0.0267041	50.6536
chr12	66088650	66088650	+	1.38784e-08	0.000207092	-68.9655
chr12	67670077	67670077	-	2.02554e-08	0.000262017	53.4884
chr12	67919404	67919404	-	1.29404e-07	0.000843461	-53.3333
chr12	68195965	68195965	-	4.28903e-05	0.0224751	-50.7907
chr12	69005423	69005423	-	9.7694e-08	0.000707492	-58.3333
chr12	69046734	69046734	-	3.21338e-06	0.00566123	-52.8882
chr12	72260704	72260704	+	2.02619e-11	1.86718e-06	61.5385
chr12	73460770	73460770	-	4.77158e-07	0.00192034	-57.5758
chr12	74182087	74182087	+	5.50931e-09	0.000115772	-51.2546
chr12	74390823	74390823	+	7.61746e-07	0.00251737	65
chr12	76407368	76407368	+	6.18797e-06	0.00807075	57.1429
chr12	77941633	77941633	+	6.36744e-07	0.00225299	52.3707
chr12	78183635	78183635	-	9.12322e-07	0.00278762	-68
chr12	81095109	81095109	-	2.75233e-07	0.00136936	54.58
chr12	82683531	82683531	+	1.06367e-07	0.000743653	50.3632
chr12	83271476	83271476	-	9.874e-09	0.000168834	67.122
chr12	84370927	84370927	-	1.38588e-05	0.0125138	51.8519
chr12	86077714	86077714	-	1.06131e-08	0.000176826	-53.5714
chr12	87469669	87469669	-	9.37843e-06	0.0101045	52.6316
chr12	89368437	89368437	-	5.98331e-06	0.00796167	-53.0564
chr12	89387315	89387315	+	2.65649e-08	0.000316868	62.9712
chr12	91981340	91981340	-	2.88528e-08	0.000334374	51.7078
chr12	92300993	92300993	+	1.02309e-05	0.0106006	61.0098
chr12	93966267	93966267	-	1.94404e-06	0.00426903	-53.3333
chr12	97834756	97834756	-	2.77285e-07	0.00137497	57.1429
chr12	99645503	99645503	+	3.05589e-20	1.13649e-14	-54.1548
chr12	99645507	99645507	+	4.02137e-19	1.19644e-13	-52.4795
chr12	99645514	99645514	+	5.41629e-21	2.45221e-15	-53.8961
chr12	99645577	99645577	+	7.76112e-14	1.32489e-08	-53.9555
chr12	99645585	99645585	+	1.71219e-13	2.74298e-08	-52.7778
chr12	99737595	99737595	+	2.45799e-08	0.000299714	-62.5
chr12	102070603	102070603	-	2.199e-06	0.0045627	-51.6129
chr12	102635284	102635284	-	9.96291e-06	0.0104341	53.4304
chr12	106079198	106079198	-	1.47391e-06	0.0036575	-54.5455
chr12	107694697	107694697	-	2.50969e-07	0.00129312	62.069
chr12	108607346	108607346	-	3.51837e-06	0.00595661	-54.2208
chr12	109876413	109876413	-	5.42509e-08	0.000498611	51.8519
chr12	109962973	109962973	-	1.03001e-06	0.00297606	51.626
chr12	110945786	110945786	+	1.27904e-07	0.000837376	52.9412
chr12	111956677	111956677	-	5.51443e-08	0.000503268	-53.5568
chr12	112308472	112308472	-	2.51978e-06	0.00494082	56
chr12	113504886	113504886	-	8.33484e-06	0.00946379	-61.2308
chr12	115807049	115807049	-	2.75708e-06	0.00517645	-58.7798
chr13	3878325	3878325	+	2.7264e-06	0.00514908	-56.3134
chr13	5537230	5537230	-	3.13677e-09	8.05874e-05	55.7447
chr13	5876072	5876072	-	8.6212e-10	3.40054e-05	61.5385
chr13	7385482	7385482	+	2.05072e-06	0.0043879	-58.8235
chr13	8528394	8528394	-	2.63577e-10	1.40866e-05	55.3676
chr13	8571740	8571740	-	1.76427e-07	0.00103561	-58.239
chr13	9701453	9701453	+	4.22882e-08	0.000428362	64.2857
chr13	9965795	9965795	-	1.20153e-05	0.011576	50.463
chr13	14235946	14235946	+	7.59182e-07	0.00251384	51.3514
chr13	14561281	14561281	-	4.88374e-07	0.00194476	67.8571
chr13	16970147	16970147	+	2.18152e-10	1.26204e-05	69.5652
chr13	18151970	18151970	+	1.5744e-09	5.17177e-05	52.7778
chr13	18868325	18868325	+	1.72624e-07	0.00102367	65.7143
chr13	20594441	20594441	+	3.44812e-06	0.0058939	56
chr13	20594450	20594450	+	3.44812e-06	0.0058939	56
chr13	20909802	20909802	-	7.03369e-11	5.15798e-06	-58.6957
chr13	21247874	21247874	+	1.77085e-07	0.00103889	-63.6364
chr13	21271424	21271424	+	7.17066e-07	0.00242512	54.8387
chr13	23660098	23660098	-	4.48649e-05	0.0230227	51.9231
chr13	24703376	24703376	+	5.86708e-06	0.00786193	-57.5758
chr13	26095011	26095011	+	5.30747e-06	0.00743046	55.8824
chr13	29099314	29099314	+	1.51433e-11	1.47374e-06	57.5411
chr13	29723473	29723473	+	2.7956e-05	0.0180032	53.3333
chr13	29804063	29804063	+	7.93443e-09	0.000146495	-55.814
chr13	30986418	30986418	+	9.78907e-06	0.0103415	53.3333
chr13	31057740	31057740	+	4.40588e-06	0.00672324	55.6735
chr13	38834432	38834432	-	4.09627e-09	9.65052e-05	-62.5
chr13	41109383	41109383	+	7.86304e-06	0.00919194	53.7356
chr13	41898066	41898066	-	6.68645e-05	0.028105	-60.2767
chr13	42720001	42720001	-	1.68017e-15	3.43058e-10	-51.721
chr13	44883871	44883871	+	1.89909e-05	0.0147345	-50.7576
chr13	45080234	45080234	-	2.26771e-06	0.00465119	50.4223
chr13	45211748	45211748	+	7.58968e-08	0.000605703	50.9745
chr13	45243427	45243427	-	4.40407e-06	0.00672146	-52.7063
chr13	47232413	47232413	-	6.41579e-06	0.00822568	-60.6061
chr13	47334468	47334468	-	1.03814e-06	0.00298813	51.5152
chr13	48134413	48134413	-	4.5677e-07	0.00187335	50.1907
chr13	48737382	48737382	+	1.83734e-10	1.12545e-05	-53.2258
chr13	48989350	48989350	+	3.78147e-09	9.13083e-05	66.6667
chr13	50220434	50220434	+	6.95312e-10	2.93135e-05	-54.7619
chr13	50316903	50316903	+	0.000102254	0.0348884	-50.4785
chr13	50674010	50674010	-	7.50343e-07	0.00249564	52.6961
chr13	52567651	52567651	+	3.28865e-07	0.00153429	51.8519
chr13	52896989	52896989	-	2.91276e-07	0.00142	51.3514
chr13	54728220	54728220	-	7.62068e-09	0.000143241	52.2784
chr13	56064796	56064796	-	3.92168e-06	0.00633332	-51.6129
chr13	57352918	57352918	+	4.26263e-09	9.88589e-05	-65.3047
chr13	58076313	58076313	+	8.00658e-06	0.00929271	51.3514
chr13	61750826	61750826	-	1.52271e-05	0.0131675	-52.3573
chr13	65415294	65415294	-	1.66594e-06	0.00391877	-52.0595
chr13	66589066	66589066	+	1.224e-15	2.54914e-10	76.9231
chr13	71810769	71810769	-	2.5092e-07	0.00129312	73.2727
chr13	72576782	72576782	+	6.69957e-07	0.00232083	57.1429
chr13	72612222	72612222	+	2.58764e-05	0.017316	-52.1739
chr13	80449664	80449664	-	2.50969e-07	0.00129312	-62.069
chr13	81342166	81342166	+	1.87442e-06	0.00417109	52.0789
chr13	81889237	81889237	-	4.69267e-06	0.00695149	52
chr13	82879579	82879579	-	3.36331e-06	0.00581222	54.8387
chr13	83199613	83199613	+	2.53546e-06	0.00495631	-51.2121
chr13	90715374	90715374	+	2.14998e-05	0.0157376	-51.8049
chr13	91273709	91273709	+	2.25889e-05	0.0161273	52.6316
chr13	92914708	92914708	+	1.92634e-10	1.16067e-05	-52.381
chr13	93808687	93808687	+	1.80164e-06	0.00408466	-56.5217
chr13	95264986	95264986	+	1.26343e-05	0.0118965	56.25
chr13	95721681	95721681	+	4.28988e-07	0.00180642	53.8462
chr13	96431528	96431528	+	1.43442e-08	0.000210675	65.522
chr13	97958024	97958024	+	9.54565e-06	0.0101947	-63.5
chr13	99097833	99097833	-	4.55039e-07	0.0018692	-50.122
chr13	99211825	99211825	-	9.69808e-06	0.0102776	51.6129
chr13	101233889	101233889	-	6.94966e-05	0.0286459	-52.1739
chr13	102110492	102110492	+	3.9108e-08	0.00041177	-50.2125
chr13	103151864	103151864	-	1.1263e-07	0.000770709	-52.8235
chr13	103576516	103576516	+	4.83698e-08	0.000463371	-66.6667
chr13	106154195	106154195	-	1.90161e-06	0.00421137	54.3956
chr13	109300850	109300850	+	2.93888e-05	0.0184869	51.4286
chr13	109782060	109782060	+	2.71925e-07	0.00135527	-53.3333
chr13	111838689	111838689	+	5.76875e-06	0.00778831	-61.5385
chr13	112005293	112005293	+	9.08386e-09	0.00016142	51.5152
chr13	114009580	114009580	-	1.06066e-06	0.00302699	50.5875
chr13	114408370	114408370	-	4.00469e-06	0.00639989	-54.8205
chr13	115261851	115261851	+	1.06431e-07	0.000743653	52.8997
chr13	117494985	117494985	+	0.000131468	0.0395973	53.9048
chr13	119435099	119435099	-	9.70359e-07	0.00288337	-60.2273
chr14	4869346	4869346	+	3.55043e-08	0.000383278	61.5385
chr14	7845499	7845499	+	1.64797e-06	0.00389307	-52
chr14	9760423	9760423	-	1.07989e-06	0.00305242	50.8824
chr14	10078727	10078727	-	8.18927e-06	0.00938536	52
chr14	10347575	10347575	+	6.38032e-10	2.73414e-05	-68.6869
chr14	10506311	10506311	+	1.15388e-07	0.000780234	73.913
chr14	11134542	11134542	-	5.56361e-08	0.000505101	68.9655
chr14	11260516	11260516	+	7.29719e-09	0.000139682	-54.5455
chr14	11885979	11885979	+	4.08359e-06	0.00644977	51.5152
chr14	12118945	12118945	-	1.15807e-06	0.00319533	-54.5455
chr14	12121907	12121907	-	1.05372e-06	0.00301363	-53.3088
chr14	12522919	12522919	-	1.24527e-08	0.000192678	51.1494
chr14	16037271	16037271	+	1.65027e-07	0.000988877	51.3514
chr14	17267932	17267932	+	4.01418e-08	0.000417171	-52.7778
chr14	22448635	22448635	-	1.09359e-05	0.0109953	56
chr14	22452954	22452954	-	2.88868e-08	0.000334374	51.1628
chr14	23468051	23468051	+	3.33022e-10	1.6919e-05	71.7532
chr14	23812297	23812297	+	1.98013e-07	0.00111156	52.381
chr14	24085651	24085651	-	1.68889e-06	0.00394791	57.0536
chr14	24281502	24281502	-	1.66301e-08	0.000232901	57.094
chr14	25483593	25483593	+	8.62355e-07	0.00269038	51.1628
chr14	28155331	28155331	-	9.27527e-07	0.00281726	51.5152
chr14	28921365	28921365	+	2.17663e-07	0.00117989	-60.2083
chr14	29208645	29208645	+	2.90355e-07	0.00141684	-52.6316
chr14	29290583	29290583	+	4.29878e-08	0.000431149	62.1622
chr14	31183187	31183187	-	3.61916e-06	0.00603567	53.3333
chr14	32045471	32045471	-	2.44418e-07	0.00127642	76.1905
chr14	32190587	32190587	+	2.14345e-09	6.30515e-05	-50.9804
chr14	33492577	33492577	-	1.02705e-05	0.0106174	-51.1283
chr14	33981516	33981516	-	1.00816e-05	0.0105097	-53.1348
chr14	34342265	34342265	-	1.02201e-05	0.0105945	57.1429
chr14	36459442	36459442	-	0.000141323	0.0410839	-50.8242
chr14	37653293	37653293	-	1.11374e-05	0.0110938	52.1739
chr14	38532590	38532590	-	6.13205e-05	0.0269426	-52.381
chr14	38850217	38850217	-	4.84814e-07	0.00193685	-52.4839
chr14	39052090	39052090	-	1.2038e-08	0.000188949	-58.8235
chr14	40769450	40769450	+	2.93432e-05	0.0184682	-53.1987
chr14	47032582	47032582	+	8.72655e-15	1.6828e-09	74.9113
chr14	47790563	47790563	+	2.1591e-12	2.64507e-07	82.8571
chr14	48100767	48100767	-	2.39194e-06	0.00478439	62.5
chr14	48937456	48937456	-	8.57285e-09	0.000154181	56.25
chr14	50370624	50370624	-	3.00738e-09	7.9033e-05	-54.5373
chr14	50461632	50461632	-	1.30266e-06	0.00339834	58.5714
chr14	55162238	55162238	-	4.89013e-06	0.00712331	57.2903
chr14	55520910	55520910	+	3.32467e-05	0.0196473	-52.069
chr14	56141856	56141856	-	3.67102e-06	0.00609295	-50.7184
chr14	57373965	57373965	+	2.51067e-05	0.0170298	50.0926
chr14	57893008	57893008	+	6.07986e-07	0.00218615	53.3445
chr14	59518113	59518113	-	3.32108e-13	5.01204e-08	-51.9231
chr14	59731545	59731545	+	1.13527e-07	0.000775198	51.3043
chr14	60052161	60052161	+	2.01017e-12	2.49194e-07	86.4035
chr14	62127152	62127152	+	1.35091e-06	0.00348029	-53.0645
chr14	62309559	62309559	-	8.27813e-09	0.000149656	54.5455
chr14	63352557	63352557	-	8.85228e-05	0.0324751	51.1921
chr14	63392051	63392051	+	1.93158e-06	0.00425421	52.1429
chr14	66642245	66642245	+	1.33671e-05	0.0122714	-57.2193
chr14	66795852	66795852	+	1.94738e-05	0.0149118	58.2069
chr14	67181076	67181076	-	5.41914e-08	0.000498611	-57.971
chr14	69054904	69054904	-	7.52975e-07	0.00250196	51.9865
chr14	71697456	71697456	-	1.66401e-05	0.0137368	54.1872
chr14	71894072	71894072	+	9.29778e-10	3.57269e-05	-51.0204
chr14	71896807	71896807	+	6.15048e-07	0.00220545	-53.9913
chr14	72299676	72299676	-	1.41867e-08	0.000210176	-64.2857
chr14	72487656	72487656	-	8.7148e-09	0.000155659	-67.1958
chr14	72497073	72497073	+	6.52283e-07	0.00228767	-54.7619
chr14	74080387	74080387	-	6.05196e-09	0.000124301	-59.4595
chr14	75907404	75907404	-	4.00162e-11	3.36046e-06	64.3321
chr14	76334173	76334173	+	1.88431e-06	0.00418998	-55.4194
chr14	77154931	77154931	+	3.14732e-10	1.63869e-05	51.3514
chr14	82187922	82187922	+	4.27162e-07	0.00180305	-53.3026
chr14	87941282	87941282	-	2.16244e-05	0.0157888	52.9825
chr14	93348255	93348255	-	1.91305e-05	0.0147837	-56.5476
chr14	96206818	96206818	+	3.22917e-08	0.000361181	68.5714
chr14	96842023	96842023	+	7.75566e-09	0.000144385	66.723
chr14	98139298	98139298	-	3.3518e-07	0.00155332	-56
chr14	98165010	98165010	-	5.98708e-05	0.0266394	-51.3187
chr14	101437419	101437419	+	8.65738e-13	1.15578e-07	61.2903
chr14	103066984	103066984	-	0.000151266	0.042357	50.2874
chr14	103364004	103364004	-	4.56342e-07	0.00187234	68
chr14	106421784	106421784	+	5.97823e-06	0.00795879	60.119
chr14	107607258	107607258	-	1.98066e-08	0.000260088	-60.0529
chr14	116707437	116707437	-	0.000138797	0.0406034	51.8841
chr14	117781715	117781715	-	2.93134e-07	0.00142456	50.814
chr14	118592400	118592400	-	1.27008e-06	0.00334644	51.5152
chr14	118716267	118716267	+	8.51684e-06	0.00957337	52.1739
chr14	120484951	120484951	+	2.12405e-06	0.00448281	52
chr14	122338125	122338125	+	1.16901e-06	0.00321447	-51.2821
chr14	124638235	124638235	-	2.47466e-10	1.34604e-05	-63.4615
chr15	3277458	3277458	+	4.93055e-09	0.000107734	-56.25
chr15	4766436	4766436	-	1.4335e-08	0.000210675	65.5172
chr15	7196175	7196175	-	2.58757e-12	3.09711e-07	76.2007
chr15	7757226	7757226	-	2.60679e-06	0.00502966	-51.8519
chr15	8401790	8401790	+	5.68285e-06	0.00771132	-51.2121
chr15	10367226	10367226	-	4.42015e-06	0.00673514	60.794
chr15	10814439	10814439	+	9.59978e-10	3.59585e-05	66.1859
chr15	10980029	10980029	-	8.43026e-07	0.00265616	-53.9855
chr15	11887769	11887769	+	2.44128e-06	0.0048428	51.1364
chr15	12005019	12005019	+	3.84088e-05	0.021204	56.4138
chr15	14907186	14907186	+	3.77702e-07	0.00168111	-60
chr15	15144012	15144012	+	1.98681e-05	0.0150674	-62.3974
chr15	19350500	19350500	-	5.23122e-06	0.00737632	52.9412
chr15	22867934	22867934	+	3.94919e-05	0.021547	52.4556
chr15	23632826	23632826	+	1.22819e-06	0.00329416	61.5385
chr15	23860530	23860530	+	1.95864e-09	5.99892e-05	58.1395
chr15	24903955	24903955	+	1.1075e-07	0.000763413	-55.8824
chr15	27936770	27936770	-	2.04501e-05	0.0153181	50.1232
chr15	29423861	29423861	+	5.21675e-07	0.0020202	60.7143
chr15	30866945	30866945	-	1.51511e-07	0.000934664	-64.2857
chr15	34514863	34514863	-	1.3557e-07	0.000863828	-55.8721
chr15	37066944	37066944	-	3.42769e-07	0.00157401	-59.0909
chr15	38672101	38672101	+	5.96116e-11	4.53101e-06	-60
chr15	39332489	39332489	-	1.01407e-05	0.0105523	50.1894
chr15	41042723	41042723	+	6.71241e-08	0.000564602	51.8519
chr15	42034541	42034541	+	5.30793e-07	0.00203844	53.5714
chr15	42606735	42606735	-	4.74416e-05	0.0236727	-54.6154
chr15	46447140	46447140	-	4.90216e-07	0.00194762	72
chr15	48658627	48658627	-	0.000105831	0.0355047	50.2165
chr15	50968991	50968991	+	4.6683e-11	3.79781e-06	73.3333
chr15	52490547	52490547	+	5.23122e-10	2.37877e-05	-57.1429
chr15	55124553	55124553	+	2.31345e-10	1.28826e-05	57.1429
chr15	55196479	55196479	-	5.37819e-05	0.0252248	50.9009
chr15	56963135	56963135	-	2.58471e-05	0.017299	52.2321
chr15	60634620	60634620	-	1.09985e-06	0.00309021	-59.4595
chr15	61116393	61116393	+	2.00764e-08	0.000261324	59.375
chr15	64167637	64167637	+	5.58799e-06	0.00764638	59.9327
chr15	64342940	64342940	+	2.04341e-07	0.0011351	68.4864
chr15	64508701	64508701	-	3.91235e-07	0.00171177	-51.4286
chr15	72311487	72311487	+	8.18284e-07	0.00260979	51.1324
chr15	74444747	74444747	+	5.78982e-07	0.00213361	-62.6894
chr15	75485329	75485329	+	1.86659e-05	0.014581	-53.8462
chr15	79998577	79998577	-	1.10085e-07	0.000760723	57.5758
chr15	82277388	82277388	+	9.38504e-07	0.00283929	53.5714
chr15	83458786	83458786	+	7.29815e-06	0.0088047	-52.3684
chr15	83549255	83549255	+	9.55384e-07	0.00286126	54.4372
chr15	84674495	84674495	+	1.31753e-10	8.52159e-06	51.5211
chr15	87231356	87231356	-	6.61819e-08	0.000559207	50.2799
chr15	87578421	87578421	+	1.79139e-06	0.00407118	64.8571
chr15	88056072	88056072	-	1.01486e-08	0.000170884	-58.3333
chr15	89024729	89024729	+	2.40219e-06	0.00479406	56.5217
chr15	89390144	89390144	-	4.73559e-07	0.0019106	63.6364
chr15	90680217	90680217	-	1.44862e-09	4.83486e-05	65.625
chr15	94508376	94508376	-	8.078e-07	0.00258904	-52.9915
chr15	94666772	94666772	+	2.94161e-05	0.0185005	54.1667
chr15	94738169	94738169	-	3.45551e-06	0.00589884	51.8519
chr15	94870720	94870720	-	1.64771e-06	0.00389307	-51.5152
chr15	95939979	95939979	-	8.01334e-08	0.000630722	50.7456
chr15	99036444	99036444	-	7.52988e-06	0.00895707	-54.0541
chr15	99586469	99586469	+	5.56303e-08	0.000505101	64.7783
chr15	100405228	100405228	-	1.22672e-07	0.000815717	-56.5359
chr15	100407895	100407895	+	1.92164e-06	0.00424216	-50.1284
chr15	102046211	102046211	+	8.01257e-05	0.0308203	-50.8995
chr15	102243052	102243052	+	1.36214e-05	0.0123847	-51.927
chr15	102251293	102251293	+	3.35295e-08	0.000370254	-60.6061
chr15	103077073	103077073	-	3.72528e-09	9.0622e-05	52.3776
chr16	10513473	10513473	-	4.01738e-06	0.00641302	-55.5556
chr16	11028988	11028988	-	2.53287e-08	0.000304565	56.4468
chr16	12454375	12454375	+	1.07482e-05	0.0109047	-50.1553
chr16	14651145	14651145	+	8.71348e-07	0.00270771	60.8696
chr16	16829188	16829188	-	1.97994e-07	0.00111156	-56
chr16	17243432	17243432	+	3.36331e-06	0.00581222	54.8387
chr16	19681189	19681189	+	3.05224e-06	0.0054968	54.8387
chr16	22653035	22653035	+	3.18576e-06	0.00562936	57.1429
chr16	24503895	24503895	-	5.66706e-12	6.21182e-07	57.5077
chr16	26407633	26407633	-	9.2211e-06	0.00999493	65.6522
chr16	29062641	29062641	+	1.45202e-07	0.000904858	63.9394
chr16	29788357	29788357	-	2.12421e-08	0.000272077	60.0794
chr16	31051052	31051052	+	2.0088e-06	0.00434148	-54.1056
chr16	32928213	32928213	-	4.90458e-10	2.32147e-05	-57.4421
chr16	32991809	32991809	+	4.68754e-10	2.25983e-05	56.6667
chr16	34463827	34463827	+	1.88907e-05	0.0146878	-50.7508
chr16	36351377	36351377	+	3.51885e-08	0.000381693	-55.5556
chr16	36406746	36406746	+	9.69808e-06	0.0102776	-51.6129
chr16	39257890	39257890	+	2.39194e-06	0.00478439	-60.8696
chr16	39743855	39743855	+	2.6688e-07	0.00133847	52.7778
chr16	40596319	40596319	+	7.20062e-09	0.000138088	51.6129
chr16	43401530	43401530	+	6.0442e-06	0.00797238	-54.2857
chr16	45576342	45576342	+	9.08386e-09	0.00016142	-51.5152
chr16	46102711	46102711	+	7.03368e-08	0.000574735	56.2434
chr16	47192454	47192454	-	1.1087e-06	0.00310855	58.3333
chr16	48743727	48743727	+	1.74363e-06	0.00401876	52.7778
chr16	49508177	49508177	+	3.30342e-05	0.0195903	55.4377
chr16	49975155	49975155	-	9.27527e-07	0.00281726	51.5152
chr16	50297819	50297819	+	2.64918e-06	0.00508132	50.2679
chr16	50702264	50702264	+	1.75465e-06	0.0040388	-55
chr16	52464353	52464353	-	4.07045e-08	0.000420083	-57.1816
chr16	55756479	55756479	-	7.05281e-06	0.00864537	-53.0303
chr16	55796769	55796769	+	2.16054e-06	0.00452281	-58.6207
chr16	55869560	55869560	+	4.48668e-07	0.00185187	50.2778
chr16	56677387	56677387	+	7.39066e-10	3.04192e-05	-56.6667
chr16	61225780	61225780	+	1.32761e-06	0.00344241	-50.7576
chr16	63748171	63748171	+	2.23076e-09	6.44093e-05	-55
chr16	63978199	63978199	+	9.58968e-07	0.0028664	54.1667
chr16	65896723	65896723	-	1.93618e-05	0.0148668	51.7473
chr16	68013635	68013635	-	9.37843e-06	0.0101045	52.6316
chr16	68890144	68890144	-	0.0001159	0.0371809	51.6522
chr16	70348100	70348100	-	8.33264e-08	0.000644169	51.8519
chr16	73345402	73345402	+	6.94779e-08	0.000571927	57.1301
chr16	74152082	74152082	+	5.09015e-08	0.0004779	-56.2594
chr16	77416738	77416738	-	4.40508e-05	0.0227942	50.3043
chr16	79693242	79693242	-	0.000107011	0.035702	50.1792
chr16	82326609	82326609	+	1.45422e-06	0.00363461	-52.3551
chr16	86385387	86385387	+	7.11682e-06	0.00868498	55.6856
chr16	90652841	90652841	+	1.14923e-07	0.00077886	62.9091
chr16	92135857	92135857	-	5.21357e-06	0.00736283	51.7241
chr16	92770041	92770041	+	1.94247e-06	0.00426903	-55.1724
chr16	94131243	94131243	+	1.06897e-05	0.0108684	-53.5
chr16	95219796	95219796	-	6.4365e-08	0.000548035	-50.8418
chr16	95427945	95427945	-	8.605e-08	0.000656495	51.5152
chr16	95926089	95926089	+	1.96612e-10	1.17665e-05	62.7907
chr16	96089190	96089190	-	8.4092e-10	3.34224e-05	-61.4625
chr17	3096158	3096158	+	4.78084e-09	0.000106256	58.3838
chr17	4052671	4052671	-	1.26207e-08	0.000193837	50.9804
chr17	4523566	4523566	+	5.04112e-10	2.354e-05	71.875
chr17	9791814	9791814	+	1.0608e-06	0.00302699	-53.1579
chr17	10345716	10345716	-	4.78157e-10	2.27759e-05	-52
chr17	11866005	11866005	-	1.3971e-08	0.000208131	-53.8882
chr17	17628406	17628406	-	5.49124e-05	0.0254401	51.3889
chr17	18315853	18315853	-	0.000114491	0.0369165	51.3333
chr17	18445408	18445408	-	2.12918e-06	0.0044881	63.871
chr17	18718610	18718610	-	1.67581e-08	0.000233922	56.6667
chr17	20914520	20914520	+	3.0818e-06	0.00552824	-52.1739
chr17	25730991	25730991	+	6.83696e-05	0.0284222	50.4545
chr17	26131631	26131631	+	5.02778e-07	0.00197642	52.7412
chr17	26218606	26218606	-	1.0374e-08	0.000173956	62.3377
chr17	31733031	31733031	+	2.06793e-05	0.0154121	-51.0753
chr17	32071276	32071276	+	5.23293e-07	0.0020227	-51.1111
chr17	32190984	32190984	-	2.64389e-05	0.017517	52.381
chr17	32811785	32811785	-	6.80005e-07	0.00234394	52.7778
chr17	33007362	33007362	+	1.32077e-06	0.00342894	-54.1667
chr17	34449024	34449024	-	1.27338e-06	0.00334644	-56.25
chr17	34470815	34470815	-	4.63764e-07	0.00188791	51.6129
chr17	34748286	34748286	+	3.68626e-05	0.0207317	51.9048
chr17	37134802	37134802	+	4.6838e-08	0.000455291	55.5556
chr17	40633295	40633295	-	1.12593e-08	0.000182341	-65.3846
chr17	41515542	41515542	-	1.24962e-07	0.000825146	51.4943
chr17	44592810	44592810	-	3.00653e-06	0.00545904	-57.1429
chr17	44676194	44676194	-	1.76427e-06	0.00404306	-55.3571
chr17	48792263	48792263	+	6.5383e-05	0.0277896	55.922
chr17	48793520	48793520	-	2.44785e-09	6.76127e-05	-52.2425
chr17	49627631	49627631	-	4.7121e-05	0.0235626	54.1667
chr17	50452422	50452422	-	6.019e-07	0.00217704	53.0252
chr17	50527135	50527135	+	5.57806e-05	0.0256065	-55.1282
chr17	51793165	51793165	+	2.319e-08	0.000287291	55.7198
chr17	52941778	52941778	+	2.4276e-05	0.0167374	-52.5517
chr17	53100761	53100761	-	1.16693e-07	0.000786076	-55.641
chr17	53743472	53743472	+	3.51612e-06	0.00595449	64.4615
chr17	54396828	54396828	+	5.7658e-09	0.000119603	-59.0909
chr17	57279860	57279860	+	1.08038e-05	0.0109297	-53.3333
chr17	57519480	57519480	-	3.05637e-06	0.00549873	54.2857
chr17	58882553	58882553	-	1.61942e-08	0.000229121	58.0645
chr17	60013552	60013552	+	6.6011e-08	0.000559179	-51.5152
chr17	63152873	63152873	-	3.29984e-05	0.0195895	54.4061
chr17	64645835	64645835	-	1.57087e-07	0.000954362	-51.6129
chr17	66572712	66572712	-	1.2038e-08	0.000188949	-60
chr17	67557666	67557666	+	1.27742e-08	0.000195543	-51.4286
chr17	67573753	67573753	-	1.09679e-09	4.0074e-05	57.2072
chr17	69157821	69157821	-	3.36576e-06	0.00581234	50.4769
chr17	69992848	69992848	+	6.9534e-07	0.00237634	-53.4884
chr17	70200103	70200103	-	6.76085e-08	0.000564708	60.7143
chr17	74978203	74978203	-	2.199e-06	0.0045627	51.6129
chr17	75294149	75294149	-	1.22255e-05	0.0116809	-54.7009
chr17	79727400	79727400	+	2.10627e-07	0.0011562	54.386
chr17	79820574	79820574	-	6.36878e-06	0.0081977	-50.2304
chr17	84053646	84053646	-	2.55027e-08	0.000305617	59.4395
chr17	84059806	84059806	-	1.69774e-07	0.00101138	-65.4762
chr17	84098870	84098870	-	8.45546e-09	0.000152528	53.3333
chr17	84895698	84895698	-	4.69267e-06	0.00695149	52
chr17	86424065	86424065	+	7.41763e-06	0.00886201	-54.8387
chr17	86820285	86820285	-	2.48077e-07	0.00128693	65.3879
chr17	88421181	88421181	+	2.84401e-06	0.00527619	50.4285
chr17	88790180	88790180	-	1.09117e-06	0.00307511	53.3699
chr18	6948562	6948562	-	1.4199e-09	4.80062e-05	58.5366
chr18	7524306	7524306	-	3.03749e-06	0.00549294	55.5644
chr18	12468772	12468772	+	1.29072e-05	0.0120363	56.25
chr18	13089532	13089532	-	0.0001121	0.0364719	-50.2331
chr18	13709582	13709582	-	1.00384e-09	3.72277e-05	56.4103
chr18	13841327	13841327	+	6.00342e-05	0.0266717	50.4762
chr18	13847446	13847446	-	3.67029e-07	0.00164952	54.3333
chr18	15785821	15785821	-	3.33089e-05	0.0196552	50.2005
chr18	16226618	16226618	+	8.28855e-07	0.00262581	60
chr18	16241909	16241909	+	2.199e-06	0.0045627	51.6129
chr18	16749434	16749434	+	3.53781e-09	8.72984e-05	53.6585
chr18	18656552	18656552	+	5.75423e-08	0.000513341	-61.5809
chr18	22250944	22250944	-	1.0995e-06	0.00309021	-51.7241
chr18	22306945	22306945	+	1.92828e-10	1.16067e-05	60
chr18	22383296	22383296	-	9.14228e-07	0.00278972	56.2149
chr18	24719472	24719472	+	6.00583e-07	0.00217591	59.8901
chr18	24950541	24950541	+	5.83109e-06	0.0078486	-59.2593
chr18	24960732	24960732	-	1.54593e-12	1.98742e-07	66.6667
chr18	25623793	25623793	+	5.56771e-07	0.0020812	-53.8462
chr18	28116602	28116602	+	9.1061e-07	0.00278484	-52.8421
chr18	29565705	29565705	+	1.0397e-07	0.000737509	-51.1111
chr18	30303002	30303002	+	6.37346e-10	2.73414e-05	68.0824
chr18	36513729	36513729	+	7.82305e-07	0.00255373	59.1534
chr18	38251535	38251535	-	8.64811e-09	0.000154733	60.5263
chr18	38278903	38278903	+	5.5105e-07	0.00206857	65
chr18	38643065	38643065	-	5.08761e-07	0.00198793	58.1159
chr18	39855272	39855272	+	4.90216e-07	0.00194762	71.5719
chr18	43495161	43495161	-	1.89676e-07	0.00108303	-52.5735
chr18	44827529	44827529	+	3.52664e-06	0.00595943	-55
chr18	44914114	44914114	+	2.6688e-07	0.00133847	-52.7778
chr18	46975135	46975135	-	2.09398e-06	0.00444457	-50.9579
chr18	46983497	46983497	-	8.07463e-09	0.000147514	60.4618
chr18	48064788	48064788	-	2.7497e-09	7.40851e-05	-62.5
chr18	51187501	51187501	+	3.44812e-06	0.0058939	56
chr18	51968238	51968238	+	1.03683e-08	0.000173956	52.9412
chr18	52311744	52311744	-	8.30299e-08	0.000643309	57.1429
chr18	57191924	57191924	+	4.23398e-09	9.86339e-05	69.5652
chr18	57257109	57257109	-	4.79677e-06	0.00704112	57.8348
chr18	58966822	58966822	+	5.15624e-08	0.000481032	51.2195
chr18	59152150	59152150	-	9.44228e-08	0.00069526	52.1337
chr18	61317325	61317325	+	6.53125e-07	0.00228767	-53.8847
chr18	61678710	61678710	+	1.79118e-06	0.00407118	55.8824
chr18	62152490	62152490	-	9.49788e-09	0.000164839	52.6316
chr18	63265067	63265067	-	1.70974e-05	0.0139613	57.6923
chr18	65418558	65418558	-	2.75026e-05	0.0178648	54.1667
chr18	67975921	67975921	-	7.99841e-06	0.00928466	53.2967
chr18	68653387	68653387	-	0.000138354	0.0405264	51.4118
chr18	69756315	69756315	-	5.3487e-07	0.00203968	51.4286
chr18	73118817	73118817	-	1.22296e-05	0.0116809	50.4464
chr18	73771623	73771623	-	2.54861e-05	0.0171641	-54.7619
chr18	74247887	74247887	+	6.29457e-09	0.000127683	-56.2812
chr18	76657242	76657242	-	2.2553e-10	1.27635e-05	74.6429
chr18	81481769	81481769	-	5.57806e-05	0.0256065	55.5556
chr18	83373109	83373109	+	1.95617e-07	0.00110587	51.5152
chr18	84353558	84353558	+	6.3566e-11	4.72805e-06	-50.9725
chr18	84875077	84875077	-	3.43841e-06	0.00588792	-60
chr19	4990416	4990416	-	2.42386e-06	0.00482143	54.5455
chr19	6424452	6424452	-	2.4416e-05	0.0168016	-51.3196
chr19	6658358	6658358	-	1.85938e-07	0.00107078	65.5172
chr19	8994757	8994757	-	1.04377e-07	0.000738884	-65.3247
chr19	10990248	10990248	+	2.75161e-06	0.00517442	-52
chr19	13412261	13412261	+	9.84592e-07	0.00290745	50.3771
chr19	14019597	14019597	+	2.06571e-09	6.19903e-05	51.2195
chr19	14325098	14325098	-	6.4618e-08	0.000549739	58.5876
chr19	15193026	15193026	-	5.19315e-07	0.0020148	-51.6401
chr19	15390491	15390491	+	9.63033e-06	0.0102465	-56
chr19	15579243	15579243	+	9.52853e-07	0.00285704	-52.7143
chr19	16052851	16052851	-	1.22047e-06	0.00328483	55.1805
chr19	16061748	16061748	+	1.45523e-06	0.00363488	-59.2593
chr19	17948808	17948808	+	3.45179e-06	0.00589539	-50.5307
chr19	18188842	18188842	+	1.09398e-06	0.00308054	-60.8893
chr19	20109799	20109799	+	2.90981e-05	0.0183828	51.4479
chr19	20564713	20564713	-	2.15184e-07	0.00117284	55.5556
chr19	20797715	20797715	+	3.71612e-08	0.000395672	-52.7979
chr19	20873898	20873898	+	5.99294e-08	0.000526187	57.1429
chr19	21040990	21040990	-	1.97489e-06	0.0043073	-50.2584
chr19	21126760	21126760	-	5.69131e-10	2.52165e-05	58.2759
chr19	22469349	22469349	-	1.8417e-07	0.00106666	-57.5
chr19	25051942	25051942	-	2.4177e-06	0.00481341	60.4004
chr19	26407013	26407013	+	9.99414e-09	0.000170051	53.2828
chr19	27448386	27448386	+	4.01348e-06	0.00641	-57.6923
chr19	29913275	29913275	-	2.51978e-06	0.00494082	56
chr19	36183728	36183728	-	7.25191e-07	0.00244545	-50.5609
chr19	37343975	37343975	+	0.000146253	0.0417856	-50.2304
chr19	37431548	37431548	+	2.61208e-08	0.000312646	-53.8462
chr19	37880281	37880281	-	1.46087e-06	0.00364105	-55.5556
chr19	41348904	41348904	-	0.000179635	0.0461517	-50.447
chr19	45857090	45857090	-	2.16904e-06	0.00452998	55.8824
chr19	46856350	46856350	-	4.03965e-08	0.000418569	-66.3532
chr19	51373314	51373314	+	2.54886e-07	0.00130691	58.3333
chr19	52770982	52770982	+	5.46169e-08	0.000501082	53.125
chr19	54725227	54725227	-	3.0097e-12	3.56143e-07	-63.3333
chr19	55047985	55047985	+	1.0458e-08	0.000175083	56.6038
chr19	56663935	56663935	+	3.73995e-06	0.00615535	53.125
chr19	56741003	56741003	-	1.30079e-08	0.000198205	65.9674
chr19	56836432	56836432	-	1.78819e-05	0.0143127	-50.7389
chr19	56897664	56897664	+	3.06597e-08	0.000349354	-69.2857
chr19	57789758	57789758	+	1.51613e-06	0.00371652	52.1739
chr19	58003831	58003831	-	4.49647e-06	0.00680206	55
chr19	58457516	58457516	-	3.05681e-10	1.59956e-05	-53.0612
chr19	59448214	59448214	+	3.08502e-06	0.0055321	53.1039
chr19	59854201	59854201	-	1.1969e-05	0.0115555	53.125
chr2	3564211	3564211	+	3.9799e-09	9.44044e-05	55.5556
chr2	4097553	4097553	-	3.49285e-05	0.0201749	-50.7331
chr2	8964828	8964828	-	8.59696e-06	0.00962498	-53.3967
chr2	10007711	10007711	+	3.0044e-07	0.0014484	-54.1667
chr2	10302664	10302664	-	4.32691e-07	0.00181497	-56.3447
chr2	10669231	10669231	-	5.77627e-07	0.00213219	54.5455
chr2	10763550	10763550	-	2.12951e-07	0.00116588	60.6061
chr2	11504396	11504396	-	1.20652e-08	0.000188949	55
chr2	12516519	12516519	-	2.93888e-05	0.0184869	51.4286
chr2	12985857	12985857	-	2.48077e-06	0.00489149	-52.7778
chr2	14788802	14788802	+	4.30357e-07	0.00180797	50.686
chr2	15189589	15189589	-	1.19442e-16	2.70386e-11	-65
chr2	15530105	15530105	-	6.23855e-06	0.00810623	51.1429
chr2	16911081	16911081	+	4.66431e-08	0.000455206	-55.1282
chr2	17192481	17192481	+	1.71771e-10	1.07558e-05	66.6667
chr2	18030049	18030049	-	8.07847e-08	0.000632027	-56.0976
chr2	21240834	21240834	-	5.91914e-09	0.000121813	-67.1922
chr2	22068525	22068525	-	0.000144847	0.0416331	51.2077
chr2	24190009	24190009	+	1.25512e-06	0.00333074	53.8462
chr2	24382667	24382667	+	5.70872e-08	0.000512025	62.5108
chr2	25216442	25216442	-	8.9612e-07	0.00275672	52.2572
chr2	26041075	26041075	-	2.64492e-07	0.00133182	-55.3922
chr2	27092952	27092952	-	1.28098e-06	0.00335491	-50.4983
chr2	27723598	27723598	-	3.51741e-07	0.00160086	-53.7273
chr2	27733842	27733842	-	3.31705e-08	0.00036903	55.1579
chr2	33391485	33391485	-	4.54479e-09	0.000103106	-55.311
chr2	34888572	34888572	+	1.39362e-05	0.0125442	-54.5455
chr2	37200343	37200343	-	1.35091e-06	0.00348029	-53.0645
chr2	41630985	41630985	+	1.34753e-05	0.0123111	51.5152
chr2	42656808	42656808	+	8.56509e-06	0.00961204	50.726
chr2	44315942	44315942	+	1.33673e-10	8.59236e-06	-66.2143
chr2	52718921	52718921	+	1.76344e-07	0.00103561	65.5172
chr2	53613219	53613219	-	6.24428e-08	0.000538418	-51.4286
chr2	53988792	53988792	+	3.40679e-09	8.5522e-05	72.4138
chr2	56456519	56456519	+	4.19975e-06	0.00654979	52.8571
chr2	57254738	57254738	+	3.3212e-07	0.00154463	53.8462
chr2	57667239	57667239	+	2.16886e-10	1.26172e-05	58.0645
chr2	59004450	59004450	+	4.79899e-09	0.000106256	54.3478
chr2	59599358	59599358	+	1.1846e-06	0.00324022	51.3196
chr2	59938395	59938395	-	6.14575e-08	0.000535092	-56.0976
chr2	61807980	61807980	+	4.67435e-07	0.0018984	55.6122
chr2	62234927	62234927	-	9.49699e-07	0.00285244	-51.4493
chr2	64004656	64004656	+	3.36331e-06	0.00581222	-54.8387
chr2	64495919	64495919	-	1.16118e-06	0.00320054	-51.2821
chr2	69393191	69393191	+	1.87493e-05	0.0146206	-52.7778
chr2	71918056	71918056	-	5.70095e-08	0.000512025	-51.6129
chr2	72455889	72455889	-	1.32365e-11	1.32696e-06	61.6391
chr2	73083844	73083844	-	1.8654e-06	0.00416468	58.0952
chr2	75436120	75436120	+	1.5206e-05	0.0131593	-52.9915
chr2	76322599	76322599	+	7.03527e-08	0.000574735	59.8268
chr2	77278471	77278471	+	8.92751e-07	0.0027496	-57.6923
chr2	77809102	77809102	+	5.4004e-06	0.00751209	61.6667
chr2	78839950	78839950	+	1.98452e-06	0.00431604	-50.0997
chr2	79918578	79918578	+	3.14202e-09	8.05874e-05	53.3441
chr2	88398775	88398775	-	5.04161e-05	0.0244024	-50.3497
chr2	88603044	88603044	+	1.61726e-08	0.000229121	-67.6715
chr2	91879745	91879745	-	1.3348e-06	0.00345671	-56.2107
chr2	93139092	93139092	+	1.42337e-07	0.000891808	-55.5556
chr2	94573810	94573810	-	2.97584e-06	0.00543649	-53.8462
chr2	94734692	94734692	-	7.48787e-05	0.0297936	50.7958
chr2	101474862	101474862	-	1.58166e-08	0.00022655	65.3846
chr2	101583763	101583763	-	7.0971e-09	0.000136979	-64.2857
chr2	102593906	102593906	+	1.056e-06	0.00301602	64.1176
chr2	105356415	105356415	-	2.26727e-05	0.0161698	56.7297
chr2	107423342	107423342	+	2.10964e-06	0.0044687	-58.6895
chr2	108535916	108535916	+	7.20062e-09	0.000138088	51.6129
chr2	109070819	109070819	-	2.89596e-07	0.00141557	52.6316
chr2	109971230	109971230	-	6.18058e-06	0.00806513	52
chr2	110293729	110293729	-	1.66376e-06	0.00391528	-53.8462
chr2	112675838	112675838	+	1.25476e-10	8.21764e-06	-62.1622
chr2	113470511	113470511	-	8.37736e-10	3.34224e-05	60.2433
chr2	113981840	113981840	-	3.00855e-06	0.00546086	59.2593
chr2	113991605	113991605	+	2.18906e-09	6.39326e-05	-51.634
chr2	115017129	115017129	+	1.24637e-07	0.000824048	52.5078
chr2	116195248	116195248	+	6.94966e-05	0.0286459	52.1739
chr2	118069761	118069761	-	2.58945e-07	0.00131388	-57.1429
chr2	121732678	121732678	+	4.99073e-06	0.00718307	-51.1299
chr2	124560199	124560199	+	9.50018e-06	0.0101788	51.1382
chr2	125477824	125477824	-	1.64797e-06	0.00389307	52
chr2	132447635	132447635	-	4.39953e-06	0.00671846	66.6667
chr2	133059678	133059678	+	4.39873e-08	0.000437905	-51.8519
chr2	135603396	135603396	+	1.18763e-07	0.000794794	-55.2632
chr2	136694459	136694459	-	4.77149e-09	0.000106256	-51.4286
chr2	136842440	136842440	+	2.1409e-09	6.30515e-05	-57.5758
chr2	137620394	137620394	-	4.00379e-06	0.00639989	-50.2353
chr2	139020701	139020701	-	1.10774e-07	0.000763413	-59.3005
chr2	140651160	140651160	-	3.20053e-08	0.000359194	-53.125
chr2	141783293	141783293	-	2.9309e-05	0.0184545	52
chr2	143767511	143767511	+	2.98791e-07	0.00144178	53.2669
chr2	144503208	144503208	+	5.51443e-09	0.000115772	-57.1429
chr2	146203602	146203602	+	8.5105e-06	0.00957023	51.8333
chr2	146874721	146874721	-	1.69166e-06	0.00395234	50.9804
chr2	146946212	146946212	+	8.1497e-07	0.00260321	-55.7018
chr2	147064992	147064992	+	1.06705e-06	0.00303281	-64
chr2	147605855	147605855	+	1.17673e-08	0.000187362	51.3636
chr2	147999612	147999612	-	2.09601e-08	0.000269792	-68.915
chr2	151116771	151116771	-	0.000118749	0.0375671	53.5714
chr2	152421694	152421694	-	2.04509e-07	0.00113518	-51.6129
chr2	154704557	154704557	+	1.38414e-07	0.000873535	54.697
chr2	157899417	157899417	+	2.50327e-08	0.000302505	-54.5455
chr2	157946460	157946460	+	2.16904e-06	0.00452998	55.8824
chr2	160194683	160194683	+	1.4865e-11	1.4603e-06	63.9961
chr2	163168543	163168543	-	5.66554e-08	0.000510831	-65.2174
chr2	163418414	163418414	-	4.84815e-05	0.0239271	51.861
chr2	165741380	165741380	+	1.27536e-07	0.000837363	-61.5385
chr2	167642786	167642786	-	1.79207e-09	5.67211e-05	-60
chr2	167784910	167784910	-	2.54969e-07	0.00130691	53.3835
chr2	169755131	169755131	+	8.71348e-07	0.00270771	-60.8696
chr2	170590920	170590920	+	2.09009e-05	0.0155051	-54.7619
chr2	173225473	173225473	+	1.84055e-05	0.0144627	-53.6062
chr2	173274403	173274403	+	0.000171664	0.0450236	-51.0968
chr2	173315736	173315736	+	6.1439e-06	0.00803909	51.9836
chr2	174275162	174275162	+	1.91611e-06	0.00423267	54.7078
chr2	178566801	178566801	-	1.80137e-05	0.0143627	51.1696
chr2	178861179	178861179	-	1.69744e-06	0.00396148	-55.1724
chr2	179669929	179669929	-	7.53973e-13	1.03306e-07	58
chr2	179748854	179748854	+	1.72494e-10	1.07558e-05	61.0913
chr2	179752653	179752653	+	2.85453e-09	7.64734e-05	-57.5758
chr3	6438958	6438958	-	1.90043e-08	0.000252096	55.5556
chr3	16387329	16387329	+	3.13329e-06	0.00556595	54.5455
chr3	16957215	16957215	-	1.78592e-09	5.66987e-05	70.9091
chr3	17007641	17007641	+	7.95743e-08	0.000628221	54.1667
chr3	21449713	21449713	+	4.6351e-07	0.00188791	53.1915
chr3	22125864	22125864	-	9.48448e-08	0.000696762	-53.125
chr3	30496215	30496215	-	6.46076e-06	0.00826096	-62.6437
chr3	37995218	37995218	+	1.44414e-06	0.00361929	59.7723
chr3	39646255	39646255	+	8.06818e-05	0.0309302	50.3695
chr3	40353183	40353183	+	5.46539e-07	0.0020601	-58.8235
chr3	41845906	41845906	+	1.86817e-07	0.00107173	55.5556
chr3	42932391	42932391	+	7.50696e-05	0.029849	51.0582
chr3	47883394	47883394	+	5.21019e-06	0.00736283	54.2857
chr3	49759374	49759374	-	7.00867e-06	0.00861153	-54.5455
chr3	50195630	50195630	-	6.16109e-13	8.78859e-08	-71.5914
chr3	51636228	51636228	+	6.14102e-07	0.00220281	-54.4402
chr3	52070913	52070913	+	1.38413e-05	0.0125049	55.8271
chr3	52601749	52601749	-	2.09124e-06	0.00444146	58.3333
chr3	53208415	53208415	+	5.22016e-05	0.0248292	-50.3333
chr3	54865146	54865146	-	4.95217e-05	0.0242012	-53.8889
chr3	58324111	58324111	+	1.88153e-06	0.00418469	64.6177
chr3	58813605	58813605	-	1.97715e-08	0.000259955	-70.4898
chr3	63068561	63068561	+	1.43695e-05	0.0127651	60.1199
chr3	65647702	65647702	+	5.76456e-07	0.00213166	57.7285
chr3	66477457	66477457	-	5.21489e-06	0.00736321	-57.6923
chr3	66501222	66501222	-	3.18828e-07	0.00150606	56.7925
chr3	66821623	66821623	-	8.89958e-08	0.000669604	67.7802
chr3	67351283	67351283	-	3.63455e-08	0.000388178	52.3077
chr3	68946738	68946738	-	6.67567e-08	0.000562876	50.4902
chr3	69372358	69372358	-	9.49131e-08	0.000696762	51.2821
chr3	69837078	69837078	+	9.58484e-08	0.000699922	54.2781
chr3	70451827	70451827	+	4.48735e-07	0.00185187	58.9286
chr3	70664191	70664191	-	2.42016e-07	0.00126896	68.7209
chr3	75487523	75487523	-	7.35759e-07	0.00246943	65.6177
chr3	75506849	75506849	+	4.01418e-08	0.000417171	52.7778
chr3	77246958	77246958	+	2.58764e-05	0.017316	52.1739
chr3	79901697	79901697	+	2.24855e-07	0.00120446	-53.125
chr3	80412256	80412256	+	1.3097e-06	0.0034079	63.2997
chr3	80860535	80860535	+	3.57823e-07	0.00161933	62.963
chr3	81196987	81196987	+	2.19804e-05	0.0159426	52.2807
chr3	84847390	84847390	-	3.45483e-07	0.00158344	52.1739
chr3	87027986	87027986	-	8.35255e-06	0.00947416	56.4286
chr3	90140229	90140229	+	5.95641e-05	0.0265916	-52.6756
chr3	96574495	96574495	-	4.6838e-08	0.000455291	-55.5556
chr3	96744201	96744201	-	2.48548e-05	0.0169436	-53.3493
chr3	98021332	98021332	-	1.97566e-05	0.0150215	-57.1839
chr3	99267748	99267748	-	5.15323e-12	5.70869e-07	-81.5934
chr3	99590110	99590110	-	5.16865e-05	0.0247028	54.3182
chr3	101425403	101425403	-	1.90648e-08	0.000252256	53.125
chr3	101910689	101910689	+	7.78363e-07	0.00254962	-57.1429
chr3	102587461	102587461	-	2.72849e-05	0.0177925	51.7241
chr3	104143074	104143074	+	2.39133e-09	6.72358e-05	-58.5034
chr3	105144351	105144351	-	2.6037e-07	0.00131568	58.0645
chr3	109724558	109724558	-	3.79114e-06	0.00620625	-57.7436
chr3	109842842	109842842	-	1.23612e-05	0.0117509	-51.8519
chr3	113995843	113995843	-	1.58342e-07	0.000959192	53.8462
chr3	114295609	114295609	-	3.06572e-07	0.00146734	53.5714
chr3	114925671	114925671	+	2.25248e-06	0.00463673	-54.1667
chr3	115067133	115067133	-	1.0919e-05	0.0109878	-53.8462
chr3	118000772	118000772	-	2.52175e-05	0.017066	-53.5647
chr3	121367143	121367143	+	2.42142e-06	0.0048184	-52.1739
chr3	121496054	121496054	-	1.66012e-06	0.00391114	58.0357
chr3	122484006	122484006	-	0.0001121	0.0364719	-52.9484
chr3	122523037	122523037	-	1.06223e-05	0.0108423	54.8387
chr3	126795168	126795168	+	0.000185876	0.0469318	-52.6154
chr3	129726911	129726911	-	1.52997e-07	0.000941044	53.1313
chr3	136334895	136334895	+	6.25117e-08	0.000538418	57.5478
chr3	136446093	136446093	-	0.000131398	0.03959	52.6455
chr3	144027776	144027776	+	8.9259e-12	9.38861e-07	65.7603
chr3	148274820	148274820	-	8.25326e-06	0.00941841	-53.3333
chr3	149293708	149293708	-	2.72534e-06	0.00514908	59.1568
chr3	149331237	149331237	+	6.0743e-05	0.0268146	57.5926
chr3	151813941	151813941	+	4.53613e-05	0.0231762	58.5284
chr3	153480149	153480149	+	1.01954e-06	0.00296143	54.1667
chr3	154648972	154648972	-	0.000142661	0.0413018	-51.2285
chr3	157125880	157125880	-	9.66904e-10	3.60881e-05	62.5946
chr3	157505965	157505965	-	4.5583e-08	0.000448644	50.9434
chr3	158074697	158074697	+	5.17085e-11	4.14194e-06	-50.7937
chr3	159724265	159724265	+	1.14923e-07	0.00077886	-66.9246
chr4	4080882	4080882	+	1.35726e-06	0.00349291	54.5455
chr4	4698663	4698663	+	1.65971e-06	0.00391114	61.5385
chr4	4926383	4926383	+	6.94388e-10	2.93135e-05	-73.0769
chr4	6542072	6542072	+	5.11385e-05	0.0245693	-50.1684
chr4	8701740	8701740	+	1.56926e-07	0.000953942	54.5217
chr4	8821497	8821497	-	1.61838e-08	0.000229121	61.2903
chr4	9250171	9250171	-	1.23612e-05	0.0117509	-51.8519
chr4	9297470	9297470	+	2.37276e-06	0.0047722	50.2626
chr4	10151392	10151392	-	1.67629e-06	0.00393054	-62.5874
chr4	10354785	10354785	-	1.61282e-05	0.0135343	51.8797
chr4	11651867	11651867	-	5.36712e-05	0.0251854	51.6667
chr4	13747831	13747831	-	1.6167e-05	0.0135427	-51.9153
chr4	13956371	13956371	+	6.12669e-06	0.00802597	-51.5499
chr4	15460884	15460884	-	4.63764e-07	0.00188791	51.6129
chr4	15822988	15822988	+	1.78852e-05	0.0143142	-59.4697
chr4	22305687	22305687	+	1.38124e-07	0.000872765	69.2308
chr4	23583277	23583277	+	2.15429e-06	0.00451494	-52.451
chr4	24220668	24220668	+	4.1495e-09	9.71002e-05	-52.0833
chr4	27825463	27825463	-	4.59087e-14	8.38697e-09	-81.0526
chr4	38367809	38367809	-	8.18927e-06	0.00938536	52
chr4	40195643	40195643	+	6.18424e-05	0.0270841	-52.795
chr4	41470025	41470025	-	2.40146e-08	0.000294546	60
chr4	41583360	41583360	+	1.07657e-06	0.00304491	54.8918
chr4	42946399	42946399	+	3.6597e-06	0.00608288	50.7143
chr4	43106240	43106240	-	6.60498e-08	0.000559179	-53.5714
chr4	43254438	43254438	-	7.48002e-09	0.000142397	-76.4785
chr4	43960721	43960721	-	1.52466e-08	0.00022174	51.3514
chr4	44417279	44417279	-	3.91235e-07	0.00171177	51.4286
chr4	44996114	44996114	+	3.23847e-08	0.000361647	-53.2828
chr4	45441776	45441776	-	1.49165e-08	0.00021805	-56
chr4	46860483	46860483	+	0.000100574	0.0345545	-54.3103
chr4	47425315	47425315	-	1.11772e-09	4.05542e-05	55.64
chr4	53018241	53018241	+	0.000104224	0.0352407	-51.9481
chr4	53104368	53104368	-	1.78226e-05	0.0142805	53.5714
chr4	55064024	55064024	-	1.25512e-06	0.00333074	-53.8462
chr4	56706722	56706722	-	1.0995e-06	0.00309021	-51.7241
chr4	58536383	58536383	-	2.38497e-05	0.0166002	52.381
chr4	58673082	58673082	-	5.83931e-06	0.0078486	52.381
chr4	62640320	62640320	-	4.75841e-05	0.0236958	54.6703
chr4	63158874	63158874	+	6.82195e-07	0.00234915	51.3889
chr4	63742708	63742708	-	9.81314e-09	0.000168069	-66.6667
chr4	65130669	65130669	+	1.01195e-07	0.000723743	-56.7647
chr4	66776787	66776787	+	1.53914e-06	0.00373947	62.963
chr4	68301347	68301347	+	6.85451e-05	0.0284341	53.059
chr4	70046591	70046591	-	5.00889e-07	0.00197502	-52.234
chr4	73459114	73459114	+	1.80389e-08	0.000242378	51.0204
chr4	74565358	74565358	+	1.77816e-07	0.00104141	62.7841
chr4	75603807	75603807	+	1.80553e-07	0.00105113	53.5714
chr4	75706929	75706929	-	1.16748e-06	0.00321194	51.4071
chr4	76051380	76051380	-	1.39829e-05	0.0125718	56
chr4	79670348	79670348	-	3.38794e-07	0.00156497	58.0645
chr4	80775263	80775263	+	3.3141e-06	0.00575653	51.9231
chr4	81751359	81751359	+	7.1817e-06	0.00872992	57.158
chr4	84305896	84305896	+	7.07824e-09	0.000136979	-64.2036
chr4	91389237	91389237	-	7.07099e-05	0.0289173	50.3722
chr4	95269956	95269956	-	1.43363e-08	0.000210675	-74.1935
chr4	96512493	96512493	-	9.63608e-05	0.0338138	52.1739
chr4	96532896	96532896	-	2.74444e-08	0.000324386	-58.206
chr4	97212180	97212180	+	5.25444e-06	0.007398	56.25
chr4	97577980	97577980	+	1.63008e-08	0.000229694	51.4347
chr4	98320870	98320870	+	3.79864e-09	9.13535e-05	74.1935
chr4	99378579	99378579	+	1.25512e-06	0.00333074	-53.8462
chr4	99709408	99709408	-	3.89295e-05	0.021364	56.6667
chr4	100321657	100321657	-	0.000145064	0.0416746	54.1667
chr4	100413125	100413125	+	7.73248e-07	0.00254006	-53.4722
chr4	100852162	100852162	-	5.27618e-06	0.00740857	-53.0769
chr4	101752380	101752380	-	4.06172e-09	9.59083e-05	64.2857
chr4	104597137	104597137	+	8.15899e-05	0.0310893	50.3205
chr4	105161663	105161663	+	1.4128e-05	0.0126242	-50.0845
chr4	105175125	105175125	+	1.87453e-07	0.00107252	61.1429
chr4	106120807	106120807	-	5.94752e-07	0.00216246	58.9744
chr4	107750573	107750573	+	2.20521e-08	0.000278682	57.7143
chr4	107988346	107988346	-	3.24775e-07	0.00152272	-55.122
chr4	110512300	110512300	+	9.80785e-08	0.000708435	50.3051
chr4	114377287	114377287	+	5.24579e-08	0.00048673	58.3333
chr4	114493675	114493675	-	7.03416e-06	0.00863114	54.1667
chr4	117821744	117821744	-	1.72101e-08	0.00023674	63.5556
chr4	119734776	119734776	+	1.46545e-05	0.0129097	-52.1739
chr4	120668804	120668804	+	1.02923e-06	0.00297606	52.381
chr4	123124656	123124656	-	1.10092e-07	0.000760723	-53.8462
chr4	125734687	125734687	-	3.2045e-07	0.00150923	-61.9048
chr4	130268911	130268911	+	9.60224e-12	9.99901e-07	-60
chr4	130796213	130796213	+	2.81553e-10	1.48074e-05	-55
chr4	131831335	131831335	+	2.92664e-08	0.000337494	52.5
chr4	132670914	132670914	+	0.000185876	0.0469318	53.8462
chr4	135317439	135317439	+	2.79495e-10	1.48074e-05	-61.7078
chr4	136512658	136512658	-	9.43384e-09	0.000164344	53.8462
chr4	136874361	136874361	-	3.49533e-05	0.0201749	60.9524
chr4	136958543	136958543	+	4.66439e-05	0.0234225	50.2463
chr4	138274913	138274913	+	7.01801e-09	0.000136625	-67.0445
chr4	139579189	139579189	+	1.1996e-05	0.0115599	50.5411
chr4	142738402	142738402	-	6.60511e-06	0.00835728	-54.7548
chr4	142975606	142975606	-	5.19081e-05	0.0247519	-51.5556
chr4	145000101	145000101	+	1.74152e-08	0.000237678	57.6923
chr4	145106847	145106847	-	5.32016e-07	0.00203968	53.3333
chr4	145130364	145130364	+	1.87006e-07	0.00107173	60
chr4	147094803	147094803	+	1.88114e-11	1.76474e-06	-62.963
chr4	148881601	148881601	-	4.57784e-06	0.00686588	-51.3196
chr4	148910088	148910088	-	5.13293e-10	2.36669e-05	-62.1622
chr4	149078916	149078916	+	4.22773e-09	9.86339e-05	-54.8387
chr4	149428156	149428156	-	5.48272e-08	0.000501337	55.2703
chr4	151465097	151465097	+	3.05357e-06	0.0054968	-59.0909
chr4	152202508	152202508	-	4.13385e-07	0.00176719	51.8398
chr4	152970990	152970990	-	4.60854e-06	0.00689012	55.5556
chr4	153002774	153002774	-	6.53759e-06	0.00830312	-54.2614
chr4	153224089	153224089	+	1.09557e-08	0.000178816	-51.9585
chr4	154510151	154510151	+	1.29234e-10	8.41086e-06	62.963
chr4	155799182	155799182	-	1.05274e-05	0.0107845	65.4545
chr4	155850424	155850424	+	8.78434e-05	0.0323593	50.463
chr5	6094170	6094170	+	2.50327e-08	0.000302505	-54.5455
chr5	6490199	6490199	+	9.74011e-07	0.00288724	54.0541
chr5	6790676	6790676	+	1.24057e-07	0.000821386	52.5
chr5	9601987	9601987	+	1.10801e-06	0.00310744	-56.4103
chr5	10465461	10465461	+	3.94066e-07	0.00171766	-52.381
chr5	18007076	18007076	-	2.18698e-06	0.00455155	57.1429
chr5	21230639	21230639	+	1.07347e-05	0.0108971	-54.8387
chr5	21850722	21850722	-	1.9321e-07	0.00109882	-53.3333
chr5	22196672	22196672	-	3.24028e-08	0.000361647	-53.1429
chr5	22320637	22320637	+	8.71175e-08	0.000661111	58.3333
chr5	22582973	22582973	+	2.08759e-09	6.2288e-05	-60
chr5	24748454	24748454	-	6.7015e-11	4.94923e-06	78.5714
chr5	25012556	25012556	+	3.55842e-08	0.000383278	-59.2593
chr5	25806907	25806907	-	7.57829e-06	0.00898489	-51.5217
chr5	27032820	27032820	-	1.0106e-05	0.0105241	52.7083
chr5	27312808	27312808	-	1.84039e-07	0.00106666	-66.7861
chr5	28957113	28957113	-	1.63658e-07	0.000983386	-51.6731
chr5	29201618	29201618	-	4.14856e-07	0.00177123	-57.7381
chr5	31267652	31267652	-	1.04094e-06	0.00299351	52.7778
chr5	32173370	32173370	-	0.000145792	0.0417286	50.9317
chr5	34556644	34556644	+	1.956e-07	0.00110587	-52.381
chr5	36200762	36200762	+	4.01771e-09	9.50847e-05	51.8261
chr5	37897465	37897465	+	3.11596e-06	0.00555348	51.0369
chr5	38640322	38640322	+	2.69778e-06	0.00512545	-59.2593
chr5	38785757	38785757	+	1.88223e-05	0.0146499	55.5556
chr5	39200950	39200950	+	1.37346e-06	0.00351404	-56
chr5	40919453	40919453	+	2.5426e-05	0.0171418	-50.3226
chr5	42948099	42948099	-	4.22584e-07	0.00179083	-55.5556
chr5	44261574	44261574	+	7.88734e-07	0.00256584	55.8333
chr5	50273255	50273255	-	0.000158036	0.0434094	51.5152
chr5	50509428	50509428	-	2.13045e-06	0.0044881	-53.6585
chr5	51991596	51991596	-	0.000122912	0.038236	-54.2857
chr5	52449190	52449190	+	1.89801e-09	5.8648e-05	-63.8444
chr5	53246295	53246295	-	2.08655e-06	0.00443332	-52.4411
chr5	53544918	53544918	+	1.03329e-06	0.00297969	58.75
chr5	54420316	54420316	+	2.23909e-09	6.44093e-05	50.8772
chr5	56293900	56293900	+	7.99203e-07	0.00257337	-52.4178
chr5	62693378	62693378	+	1.59203e-08	0.000227459	70.9821
chr5	62716896	62716896	-	9.79815e-11	6.66864e-06	-69.436
chr5	63000499	63000499	-	3.53701e-09	8.72984e-05	-72.7273
chr5	64596981	64596981	+	2.261e-05	0.0161337	51.3514
chr5	65836596	65836596	-	5.58342e-08	0.000505481	-62.1212
chr5	67118701	67118701	+	8.7554e-07	0.00271992	53.5
chr5	70297665	70297665	-	9.41507e-09	0.000164344	65.0327
chr5	73678400	73678400	+	1.0919e-05	0.0109878	53.8462
chr5	77026910	77026910	-	2.57586e-06	0.00500149	59.2593
chr5	77902631	77902631	-	6.03436e-06	0.00797238	51.8428
chr5	79618693	79618693	-	2.87089e-07	0.00140816	-55.1209
chr5	82478249	82478249	-	1.12066e-07	0.000769257	52.6316
chr5	84449921	84449921	+	1.29458e-05	0.0120437	-57.697
chr5	85529319	85529319	-	3.15272e-07	0.00149772	-59.4089
chr5	86814652	86814652	+	1.52888e-05	0.0131754	55.4131
chr5	87734399	87734399	-	4.67291e-07	0.0018984	-56.5217
chr5	90962435	90962435	+	9.58574e-09	0.000165262	-53.7546
chr5	92197247	92197247	-	1.91627e-05	0.014803	-57.1429
chr5	95788708	95788708	-	3.91235e-07	0.00171177	-51.4286
chr5	98651109	98651109	+	1.62707e-06	0.0038665	53.8462
chr5	98651228	98651228	+	4.7121e-05	0.0235626	53.625
chr5	99381050	99381050	+	4.24396e-07	0.00179647	54.2995
chr5	100551866	100551866	+	3.07031e-05	0.0188715	50.3979
chr5	100777207	100777207	-	3.73751e-07	0.00166965	-54.3396
chr5	102152348	102152348	+	5.12202e-08	0.000479215	55.6757
chr5	102682358	102682358	+	1.07567e-05	0.0109074	53.8697
chr5	109731810	109731810	-	2.23348e-09	6.44093e-05	-54.8824
chr5	109734714	109734714	-	4.04309e-06	0.00642084	52.9167
chr5	110339924	110339924	+	1.46545e-05	0.0129097	-52.1739
chr5	111038040	111038040	-	1.34406e-06	0.00347195	-60.2397
chr5	111178587	111178587	-	2.79431e-07	0.00138297	-59.1837
chr5	111227141	111227141	+	3.05224e-06	0.0054968	54.8387
chr5	112016631	112016631	+	2.15928e-08	0.000275214	67.7419
chr5	112295889	112295889	-	3.3053e-11	2.86823e-06	-55.8824
chr5	112467958	112467958	+	4.9635e-08	0.000471158	-72.7273
chr5	114533329	114533329	+	9.50142e-08	0.000696762	-52.9412
chr5	114879037	114879037	+	3.39416e-05	0.0198652	50.4808
chr5	120923730	120923730	+	3.69516e-06	0.00612032	55.4859
chr5	122412634	122412634	+	2.24842e-05	0.0161171	54.5455
chr5	122927072	122927072	+	8.27813e-09	0.000149656	-54.5455
chr5	124298313	124298313	-	5.71494e-10	2.52165e-05	53.5714
chr5	125768958	125768958	-	5.01925e-09	0.000108212	60.299
chr5	126886988	126886988	-	6.04117e-08	0.000528195	-62.963
chr5	127951168	127951168	-	2.75284e-06	0.00517442	50.9146
chr5	128676170	128676170	+	2.984e-05	0.0185719	56.266
chr5	128698803	128698803	-	7.17066e-07	0.00242512	-54.8387
chr5	129157061	129157061	+	1.80164e-06	0.00408466	-56.5217
chr5	130882836	130882836	+	4.49647e-06	0.00680206	55
chr5	134399548	134399548	+	2.86412e-09	7.64734e-05	-56.1404
chr5	134405824	134405824	+	2.17029e-08	0.000275606	51.1628
chr5	136505738	136505738	+	1.60551e-05	0.0135012	56.2069
chr5	139957390	139957390	+	2.21301e-10	1.26985e-05	-77.7083
chr5	140029197	140029197	-	7.56866e-09	0.000143038	52.336
chr5	141868259	141868259	-	1.34753e-05	0.0123111	51.5152
chr5	142320481	142320481	-	2.67127e-06	0.00510183	-52.0124
chr5	147860087	147860087	-	2.29751e-09	6.53672e-05	-66.7774
chr6	3924621	3924621	-	1.4565e-06	0.00363488	-52.6542
chr6	5181423	5181423	+	2.4566e-08	0.000299714	65
chr6	6001444	6001444	-	7.32225e-08	0.000590998	69.2308
chr6	7980524	7980524	+	7.02614e-06	0.00862677	-50.8718
chr6	9753415	9753415	+	1.00647e-06	0.00294742	-52
chr6	10407104	10407104	-	6.67731e-09	0.000132125	70
chr6	18358249	18358249	-	2.88995e-08	0.000334374	65.6593
chr6	19933766	19933766	+	1.06183e-13	1.75509e-08	-70.3987
chr6	20389733	20389733	+	1.50831e-06	0.00371179	51.8519
chr6	22941959	22941959	-	3.22399e-06	0.00567274	56.5217
chr6	30041303	30041303	+	4.07327e-06	0.00644128	54.5455
chr6	30383642	30383642	-	3.23057e-10	1.67366e-05	77.9279
chr6	31528726	31528726	-	7.43736e-08	0.00059897	-62.8676
chr6	31563385	31563385	-	9.44755e-08	0.00069526	-58.4175
chr6	32458642	32458642	+	2.33475e-09	6.62459e-05	76.3889
chr6	33219789	33219789	-	1.46754e-05	0.0129202	55
chr6	33829368	33829368	+	4.62738e-06	0.00690813	-52.381
chr6	35298122	35298122	+	6.07524e-06	0.00799378	56.8182
chr6	36399016	36399016	+	1.51613e-06	0.00371652	52.1739
chr6	39100440	39100440	+	7.82599e-11	5.58176e-06	-62.7907
chr6	41642767	41642767	-	7.31699e-05	0.029441	54.8726
chr6	41718112	41718112	+	2.40219e-06	0.00479406	-56.5217
chr6	42384988	42384988	+	1.22879e-10	8.0985e-06	70.2703
chr6	48174732	48174732	+	3.52002e-10	1.77076e-05	-54.3089
chr6	48976993	48976993	-	8.11517e-06	0.00935722	-51.7293
chr6	49280235	49280235	+	1.11374e-05	0.0110938	52.1739
chr6	49363778	49363778	-	9.19132e-10	3.54486e-05	63.2753
chr6	49498934	49498934	-	0.000210188	0.0497682	50.5305
chr6	50687245	50687245	+	0.000128909	0.0391882	51.8214
chr6	50836811	50836811	-	4.23505e-08	0.000428373	59.4293
chr6	53344374	53344374	-	2.33306e-07	0.00123511	-51.4595
chr6	53532914	53532914	+	4.45825e-07	0.00184298	-62.7252
chr6	55425198	55425198	-	3.89559e-07	0.00171177	50.8333
chr6	55675653	55675653	-	9.93097e-06	0.0104079	-52.5
chr6	57082642	57082642	-	3.88651e-09	9.28236e-05	54.0984
chr6	63469749	63469749	+	1.05236e-05	0.0107845	55.1765
chr6	68439821	68439821	+	9.3699e-09	0.000163984	-57.6923
chr6	69696520	69696520	+	2.87895e-08	0.000334374	-57.6923
chr6	69832780	69832780	-	6.32511e-10	2.73297e-05	-50.4611
chr6	71879065	71879065	+	1.60107e-07	0.00096707	-57.6649
chr6	72073362	72073362	-	4.90928e-09	0.000107734	-51.2821
chr6	75562219	75562219	+	4.01348e-06	0.00641	57.6923
chr6	77483587	77483587	-	7.78363e-07	0.00254962	57.1429
chr6	77654222	77654222	+	6.77527e-05	0.028299	-55.7143
chr6	78530556	78530556	+	1.16878e-08	0.000186382	-51.7241
chr6	79383651	79383651	+	9.50562e-06	0.0101806	-56
chr6	81362568	81362568	+	5.51228e-10	2.46354e-05	58.3333
chr6	81744287	81744287	-	1.05547e-08	0.000176418	54.8644
chr6	83911243	83911243	+	6.80378e-06	0.00846347	-60.9091
chr6	87176851	87176851	-	1.70798e-07	0.00101515	-51.615
chr6	87523508	87523508	+	2.28097e-10	1.277e-05	66.9881
chr6	87576283	87576283	-	4.21289e-06	0.00656634	59.8558
chr6	88028317	88028317	-	8.90013e-05	0.0325406	50.4909
chr6	88846579	88846579	+	2.42333e-07	0.0012695	54.5455
chr6	89243242	89243242	+	4.11542e-23	3.06105e-17	92.9175
chr6	90374413	90374413	+	2.1737e-09	6.3761e-05	-73.0588
chr6	91006871	91006871	+	2.12016e-08	0.000271892	-59.5238
chr6	91562702	91562702	+	9.95647e-09	0.000169687	64.1026
chr6	92671019	92671019	-	6.4622e-06	0.00826168	-55.625
chr6	92805594	92805594	+	8.18284e-07	0.00260979	-51.1324
chr6	94543147	94543147	+	1.65734e-05	0.0137133	-54.2857
chr6	94683321	94683321	+	1.00809e-05	0.0105097	-57.1237
chr6	96376612	96376612	+	1.19631e-09	4.25167e-05	-59.061
chr6	99516702	99516702	+	7.21964e-08	0.000585056	-71.4286
chr6	99802158	99802158	-	1.13291e-06	0.0031611	-56.229
chr6	100565958	100565958	-	3.48397e-05	0.0201487	51.8227
chr6	101280103	101280103	+	1.03322e-06	0.00297969	51.4102
chr6	101296644	101296644	-	2.40219e-06	0.00479406	56.5217
chr6	101519333	101519333	-	3.0818e-06	0.00552824	-52.1739
chr6	103468111	103468111	+	5.02611e-07	0.00197642	-51.2195
chr6	107131042	107131042	-	1.5715e-08	0.000225762	62.963
chr6	108134592	108134592	+	1.17854e-06	0.00322959	-60
chr6	110369604	110369604	-	6.16731e-07	0.00220996	-54.1667
chr6	110798307	110798307	+	2.61786e-07	0.00132048	-54.8387
chr6	111817440	111817440	+	1.09287e-07	0.000757173	56.5217
chr6	112171671	112171671	+	3.86783e-06	0.00627484	58.5
chr6	113014013	113014013	-	1.19152e-05	0.0115312	52.0513
chr6	114135650	114135650	+	1.49608e-12	1.94738e-07	72.7273
chr6	115250137	115250137	+	2.8113e-08	0.000330787	-58.2445
chr6	116208869	116208869	+	3.82437e-05	0.0211537	-50.4274
chr6	119331415	119331415	+	1.03296e-06	0.00297969	54.8387
chr6	122063810	122063810	+	0.000194774	0.0480326	50.2841
chr6	123879037	123879037	+	3.12939e-06	0.00556328	-57.0292
chr6	124583183	124583183	+	5.77233e-05	0.0261194	52.9762
chr6	126731761	126731761	+	3.51741e-07	0.00160086	53.7273
chr6	128378835	128378835	+	1.34997e-07	0.000862246	-51.9841
chr6	130880949	130880949	+	3.36706e-11	2.87393e-06	69.2308
chr6	132338285	132338285	-	6.94966e-05	0.0286459	52.1739
chr6	133434579	133434579	+	7.17066e-07	0.00242512	-54.8387
chr6	133977645	133977645	-	1.63004e-07	0.000980326	-52.381
chr6	134459943	134459943	-	4.65969e-07	0.00189541	-52.0833
chr6	135435478	135435478	-	2.84967e-06	0.00528196	57.9955
chr6	136714471	136714471	-	9.86947e-07	0.00291141	54.2857
chr6	137318507	137318507	-	2.50535e-06	0.00492239	51.8398
chr6	137792876	137792876	-	6.18164e-06	0.00806549	-56.6667
chr6	137817050	137817050	-	1.23612e-05	0.0117509	51.8519
chr6	138090363	138090363	+	2.4644e-07	0.00128183	-55.5556
chr6	141321143	141321143	-	1.08349e-05	0.0109466	-51.2857
chr6	143448769	143448769	-	1.41354e-09	4.80062e-05	-52.6316
chr6	144044465	144044465	+	3.73342e-09	9.0622e-05	63.0189
chr6	144740845	144740845	+	8.59622e-06	0.00962498	60.1966
chr6	145735104	145735104	-	1.02512e-06	0.0029685	-61.5385
chr6	146016396	146016396	-	4.17212e-08	0.0004251	-53.125
chr6	148071672	148071672	-	2.26219e-07	0.00120803	55.814
chr7	4123507	4123507	+	1.76984e-06	0.00405066	-51.4286
chr7	5044984	5044984	-	2.18126e-07	0.00118099	51.1628
chr7	13303625	13303625	+	3.10048e-06	0.00554631	54.8387
chr7	17334276	17334276	-	4.10046e-07	0.00175861	62.5
chr7	18230563	18230563	+	4.60336e-09	0.000104208	-53.4884
chr7	23337450	23337450	+	1.0995e-06	0.00309021	51.7241
chr7	23470931	23470931	+	0.000164176	0.0441901	-50.4274
chr7	30490139	30490139	-	2.61618e-06	0.00504216	51.4286
chr7	31151967	31151967	-	1.69429e-06	0.00395671	60.8696
chr7	31234807	31234807	+	6.13205e-05	0.0269426	-52.381
chr7	31772486	31772486	+	8.66507e-07	0.00269992	-51.3514
chr7	38294927	38294927	-	1.82246e-05	0.0143893	50.9409
chr7	42869391	42869391	+	7.60688e-07	0.00251627	56.1016
chr7	44503227	44503227	-	3.51336e-07	0.00160086	51.6129
chr7	44887547	44887547	-	1.13615e-06	0.00316335	-50.789
chr7	44982058	44982058	-	1.80143e-05	0.0143627	51.1905
chr7	47236952	47236952	-	6.23645e-14	1.1007e-08	-74.2857
chr7	49817658	49817658	-	9.5216e-07	0.00285704	-53.8462
chr7	51117132	51117132	-	1.26736e-09	4.44353e-05	-53.2783
chr7	53176601	53176601	-	7.03416e-06	0.00863114	-54.1667
chr7	53456978	53456978	-	1.0919e-05	0.0109878	53.8462
chr7	55100174	55100174	-	6.62142e-08	0.000559207	-55
chr7	57451932	57451932	+	1.4189e-08	0.000210176	50.8333
chr7	61083085	61083085	-	6.95087e-09	0.000136054	-65.2174
chr7	62766633	62766633	+	1.91827e-05	0.0148163	53.9855
chr7	64943643	64943643	+	1.35769e-09	4.66597e-05	-58.6207
chr7	66300366	66300366	+	1.93362e-07	0.00109908	58.3333
chr7	66765825	66765825	+	5.72641e-08	0.000512728	-63.9676
chr7	66933427	66933427	+	1.69705e-09	5.42079e-05	52.0865
chr7	67455895	67455895	-	1.14778e-06	0.00318361	54.5238
chr7	67847414	67847414	-	6.35939e-07	0.00225167	52.9412
chr7	69532985	69532985	-	3.12083e-05	0.0190046	-54.2484
chr7	69606813	69606813	+	6.96866e-09	0.000136147	-50.0878
chr7	71687174	71687174	-	0.000164799	0.0442683	52.381
chr7	73058937	73058937	+	3.97619e-06	0.00637112	56.2963
chr7	74061340	74061340	+	4.05022e-05	0.0217569	52
chr7	77859405	77859405	+	1.81612e-06	0.00410563	64.2857
chr7	79152233	79152233	+	1.47479e-07	0.000916855	58.3333
chr7	79225293	79225293	-	1.79139e-06	0.00407118	-64.8571
chr7	80008810	80008810	+	9.41869e-06	0.0101217	51.6129
chr7	84000342	84000342	+	4.86204e-07	0.00193911	51.7241
chr7	85226514	85226514	+	4.15149e-06	0.00650314	50.5128
chr7	87454311	87454311	-	1.94073e-05	0.014875	-52.1739
chr7	89118464	89118464	-	3.4523e-07	0.00158298	-54.5455
chr7	89774065	89774065	-	4.9781e-09	0.000107734	58.0645
chr7	94527679	94527679	-	1.96068e-06	0.00428658	63.5897
chr7	98895462	98895462	+	3.57823e-07	0.00161933	62.963
chr7	99734367	99734367	-	8.53175e-08	0.000652776	50.2273
chr7	99815000	99815000	+	3.33619e-08	0.000369506	-54
chr7	99832823	99832823	+	3.10695e-06	0.00554945	59.2437
chr7	99916038	99916038	+	4.99696e-12	5.59509e-07	-63.6364
chr7	101335988	101335988	-	1.22538e-11	1.251e-06	64.7173
chr7	102648418	102648418	-	1.63055e-07	0.000980326	59.2593
chr7	105735882	105735882	-	1.85581e-07	0.00107078	53.3613
chr7	107931931	107931931	+	9.48309e-07	0.00285184	57.8947
chr7	109484276	109484276	+	1.49952e-05	0.0130796	-52.4038
chr7	109663377	109663377	-	6.68669e-09	0.000132125	57.6923
chr7	112642113	112642113	+	2.54718e-10	1.37432e-05	-69.3333
chr7	112850856	112850856	+	3.23079e-07	0.00151678	54.798
chr7	112888811	112888811	-	1.25946e-08	0.000193837	52.381
chr7	113840408	113840408	-	3.47504e-05	0.0201158	54.2029
chr7	115748517	115748517	+	8.7007e-08	0.000660848	68.8889
chr7	117093470	117093470	-	2.73635e-08	0.000323797	55.1724
chr7	118412036	118412036	-	1.23612e-06	0.00330304	59.2593
chr7	121356326	121356326	-	5.85978e-08	0.000517989	56.9293
chr7	121445767	121445767	-	2.40219e-06	0.00479406	56.5217
chr7	122799777	122799777	-	4.1072e-08	0.000423037	63.2184
chr7	123090711	123090711	-	6.25316e-06	0.00811913	51.5152
chr7	126099972	126099972	-	2.58373e-07	0.00131276	57.7778
chr7	127013830	127013830	+	2.24842e-05	0.0161171	54.5455
chr7	129811516	129811516	+	9.69937e-09	0.000166545	52.1739
chr7	130021800	130021800	-	4.82398e-07	0.00193204	53.964
chr7	130211815	130211815	-	3.33604e-07	0.00154853	57.9221
chr7	131201543	131201543	-	2.71904e-09	7.39268e-05	-58.9852
chr7	133485658	133485658	-	1.2389e-05	0.0117665	-53.8462
chr7	134064186	134064186	+	1.1507e-09	4.15742e-05	60
chr7	134277606	134277606	-	2.73478e-06	0.00515809	-51.3262
chr7	135381479	135381479	+	0.000132004	0.0396653	-55.4487
chr7	136045429	136045429	-	6.24428e-08	0.000538418	-51.4286
chr7	138925945	138925945	-	1.08046e-10	7.25875e-06	-66.6667
chr7	140134180	140134180	-	1.25538e-07	0.000827378	-71.4286
chr7	141391569	141391569	+	1.25852e-07	0.000828919	-53.125
chr7	144960132	144960132	-	5.6369e-05	0.0257182	52.963
chr8	3402287	3402287	-	1.28041e-06	0.00335491	60.9677
chr8	4585374	4585374	-	1.77086e-06	0.00405066	-60.4167
chr8	4801969	4801969	+	3.73353e-06	0.0061477	54.7619
chr8	5721366	5721366	-	4.69102e-06	0.00695149	51.2941
chr8	5762548	5762548	+	7.61529e-07	0.00251737	-60
chr8	10377790	10377790	-	9.92252e-05	0.0343532	-51.8519
chr8	12450607	12450607	-	5.56771e-07	0.0020812	53.8462
chr8	12480554	12480554	+	4.29361e-05	0.0224751	52.193
chr8	12615170	12615170	+	2.66639e-07	0.00133847	61.9748
chr8	16798071	16798071	-	2.90157e-11	2.53904e-06	-55.1788
chr8	18094580	18094580	-	1.42518e-05	0.0127065	-52.8239
chr8	18231460	18231460	+	5.02742e-08	0.000474692	-55.5556
chr8	18505011	18505011	+	5.14372e-07	0.00200458	53.5983
chr8	19657258	19657258	-	8.18927e-06	0.00938536	52
chr8	24109004	24109004	+	2.78452e-05	0.0179863	50.5128
chr8	28341328	28341328	+	1.41164e-07	0.000886256	59.2118
chr8	28482459	28482459	-	5.77627e-07	0.00213219	-54.5455
chr8	28819320	28819320	+	4.67322e-07	0.0018984	57.7303
chr8	31621489	31621489	+	3.2446e-06	0.00569632	64.2857
chr8	31880493	31880493	+	3.42065e-07	0.00157332	-51.0101
chr8	33288452	33288452	+	9.7694e-08	0.000707492	-58.3333
chr8	34334809	34334809	-	4.26247e-09	9.88589e-05	62.3737
chr8	38802681	38802681	+	3.83356e-10	1.91003e-05	62.5
chr8	43051571	43051571	+	5.4004e-06	0.00751209	61.6667
chr8	48374683	48374683	-	4.48864e-07	0.00185187	59.0909
chr8	48799417	48799417	+	1.07829e-07	0.000749063	54.5455
chr8	49319978	49319978	-	7.47316e-08	0.000600923	59.0557
chr8	51231026	51231026	-	0.000192404	0.0476416	-52.3238
chr8	51488347	51488347	-	3.30342e-05	0.0195903	-55.4377
chr8	52300974	52300974	-	1.55155e-06	0.00375911	54.7619
chr8	52916656	52916656	-	5.0647e-09	0.000108693	-73.9394
chr8	53009380	53009380	+	7.95202e-07	0.00257262	58.8235
chr8	53611694	53611694	+	3.21384e-09	8.18249e-05	-53.4292
chr8	54539879	54539879	-	5.8428e-07	0.0021412	-55.5556
chr8	58570897	58570897	+	8.00469e-07	0.0025753	-52.7778
chr8	59095026	59095026	-	9.66711e-08	0.000703346	-58.6207
chr8	59159307	59159307	-	7.04804e-07	0.00239454	-50.3636
chr8	59730707	59730707	-	1.68409e-09	5.39592e-05	50.5335
chr8	63992795	63992795	-	6.91692e-05	0.0285766	-50.463
chr8	65635080	65635080	+	3.09156e-06	0.00553826	-53.9898
chr8	68262015	68262015	-	9.61217e-14	1.61441e-08	64.1791
chr8	71496761	71496761	+	6.81339e-06	0.00846347	60.8696
chr8	73105587	73105587	+	5.93234e-12	6.43486e-07	-84
chr8	77345377	77345377	+	6.23369e-07	0.00222304	-57.5758
chr8	77372808	77372808	-	4.39851e-11	3.63512e-06	-63.6319
chr8	78163141	78163141	+	1.34039e-06	0.00346647	-54.5455
chr8	78650548	78650548	+	1.76398e-06	0.00404306	54.9035
chr8	78694618	78694618	+	2.20216e-09	6.39326e-05	50.7456
chr8	78716768	78716768	+	1.71179e-08	0.000236601	-61.8577
chr8	79198216	79198216	-	6.07776e-09	0.000124585	76.1905
chr8	79375226	79375226	+	1.02172e-05	0.0105945	-52.5641
chr8	79675741	79675741	+	1.80164e-06	0.00408466	56.5217
chr8	79933923	79933923	-	7.14194e-07	0.00242013	58.4555
chr8	81431051	81431051	-	1.97296e-07	0.00110993	63.8889
chr8	82742717	82742717	+	4.11323e-11	3.42655e-06	-63.1988
chr8	83590355	83590355	+	2.0895e-06	0.00443869	57.8571
chr8	87785471	87785471	+	1.05688e-11	1.08966e-06	-67.1262
chr8	88289336	88289336	-	2.38544e-05	0.0166002	53.2855
chr8	89176787	89176787	+	3.06599e-09	7.96179e-05	69.5652
chr8	90825396	90825396	+	2.9789e-05	0.0185719	50.3788
chr8	91489527	91489527	+	1.37402e-06	0.00351461	-54.8468
chr8	93701148	93701148	-	1.12647e-07	0.000770709	-51.5152
chr8	93974666	93974666	+	4.98674e-09	0.000107734	-57.4359
chr8	95681044	95681044	-	1.45664e-06	0.00363488	50.5832
chr8	96539905	96539905	-	4.63764e-07	0.00188791	51.6129
chr8	98535511	98535511	-	4.72076e-08	0.000456807	-60
chr8	99436580	99436580	-	2.9309e-05	0.0184545	52
chr8	106186432	106186432	-	4.13688e-06	0.0064942	54.902
chr8	106338682	106338682	-	1.77654e-06	0.00405336	53.5879
chr8	107857306	107857306	-	1.93114e-06	0.00425414	52.6591
chr8	109959280	109959280	+	3.65815e-09	8.92111e-05	58.2653
chr8	110700498	110700498	-	5.22973e-07	0.00202221	-60
chr8	114768627	114768627	-	6.35805e-09	0.000128559	-52.9167
chr8	114883661	114883661	+	1.10368e-08	0.000179323	-68
chr8	114938552	114938552	+	1.19733e-05	0.0115555	-52.1978
chr8	117854347	117854347	+	4.22023e-08	0.000427908	57.3529
chr8	118598104	118598104	+	1.52489e-09	5.05701e-05	-59.2593
chr8	120918289	120918289	+	4.99418e-07	0.00197214	56.25
chr8	126460515	126460515	+	1.66376e-06	0.00391528	-53.8462
chr8	126602866	126602866	+	3.84142e-05	0.0212052	54.5455
chr8	126698814	126698814	+	2.38445e-07	0.0012572	-54.1667
chr9	7430914	7430914	-	1.01486e-08	0.000170884	58.3333
chr9	8129541	8129541	+	2.23087e-07	0.00119745	58.0645
chr9	8699850	8699850	+	5.86583e-05	0.0263747	51.9949
chr9	9253893	9253893	+	6.1856e-07	0.00221322	-56.6667
chr9	9809053	9809053	-	1.39214e-07	0.000876459	55.4196
chr9	10061427	10061427	+	9.30605e-07	0.00282278	57.0608
chr9	10437318	10437318	+	1.72843e-09	5.50412e-05	56.7568
chr9	14020675	14020675	-	5.54139e-06	0.00761015	57.1429
chr9	14306591	14306591	+	6.01652e-06	0.00797238	53.125
chr9	15147487	15147487	-	6.98687e-05	0.0287269	54.5455
chr9	15512608	15512608	-	5.6768e-06	0.00770696	-52.1102
chr9	17041796	17041796	-	1.94404e-06	0.00426903	51.7241
chr9	22762206	22762206	-	1.16118e-06	0.00320054	51.2821
chr9	24194378	24194378	+	1.1882e-06	0.00324664	53.4925
chr9	29262291	29262291	+	4.38004e-06	0.00670578	60
chr9	29461377	29461377	-	1.22255e-05	0.0116809	-52.0325
chr9	30181919	30181919	-	2.25592e-08	0.00028176	75.7576
chr9	30846457	30846457	+	7.55645e-06	0.00897854	-52.9412
chr9	32292370	32292370	+	3.99631e-10	1.96294e-05	57.6509
chr9	36948727	36948727	-	2.97676e-07	0.00143809	53.3333
chr9	37576422	37576422	+	2.92581e-06	0.00537338	55.6064
chr9	39217913	39217913	-	6.08818e-06	0.00799929	62.1212
chr9	40051673	40051673	-	4.07426e-05	0.0218545	54.7454
chr9	40191709	40191709	+	8.16173e-09	0.000148324	50.2087
chr9	40666657	40666657	+	2.92351e-08	0.000337494	-55.8824
chr9	42242063	42242063	+	1.87661e-08	0.000250383	50.817
chr9	42577088	42577088	-	6.24677e-08	0.000538418	53.8462
chr9	43830987	43830987	-	8.4397e-08	0.000648899	-53.5714
chr9	45790679	45790679	+	1.81794e-09	5.72267e-05	64
chr9	46477799	46477799	+	1.40437e-06	0.00356595	-52.9363
chr9	47241187	47241187	-	1.79846e-10	1.10815e-05	70.2128
chr9	47432076	47432076	+	2.40192e-09	6.72358e-05	75
chr9	47462899	47462899	-	3.81198e-08	0.000402994	56.4599
chr9	50863275	50863275	+	4.17212e-08	0.0004251	-53.125
chr9	51091979	51091979	-	2.80915e-07	0.00138834	-57.3782
chr9	51704053	51704053	-	3.58349e-06	0.00600512	52
chr9	52663808	52663808	+	3.1153e-06	0.00555348	58.7317
chr9	54288055	54288055	-	6.51338e-06	0.0082832	-53.5714
chr9	54783235	54783235	-	3.00653e-06	0.00545904	57.1429
chr9	55289918	55289918	-	4.69267e-06	0.00695149	52
chr9	56200500	56200500	-	2.75332e-09	7.40851e-05	50.3284
chr9	58741427	58741427	-	6.16102e-08	0.000535526	51.3514
chr9	59691004	59691004	-	2.87895e-08	0.000334374	57.6923
chr9	60986699	60986699	-	2.55042e-08	0.000305617	54.2857
chr9	61129806	61129806	+	2.73669e-06	0.00515964	53.3333
chr9	61379958	61379958	-	1.23952e-07	0.000821386	61.7886
chr9	62032108	62032108	+	7.65168e-05	0.0301265	50.5013
chr9	63055026	63055026	-	1.52888e-05	0.0131754	-53.9886
chr9	65168994	65168994	+	9.38504e-07	0.00283929	-53.5714
chr9	66076347	66076347	-	2.17474e-05	0.0158505	52.8571
chr9	66984506	66984506	-	6.1856e-07	0.00221322	-56.6667
chr9	67508075	67508075	-	4.01738e-06	0.00641302	53.8462
chr9	67709007	67709007	-	3.85469e-06	0.00626009	-53.8462
chr9	67907959	67907959	+	3.96703e-07	0.00172482	58.3333
chr9	67934588	67934588	-	2.11789e-09	6.30116e-05	-66.4141
chr9	67950879	67950879	-	1.01588e-05	0.0105613	-55.1724
chr9	68936747	68936747	-	4.12443e-07	0.00176525	66.6667
chr9	69174174	69174174	-	2.22761e-08	0.000279709	-55.2632
chr9	69690025	69690025	+	1.55102e-08	0.000223984	64.0029
chr9	70735172	70735172	-	3.89731e-09	9.28684e-05	64.1935
chr9	72421869	72421869	-	2.04964e-07	0.00113649	52
chr9	72478360	72478360	+	7.58968e-08	0.000605703	50.9745
chr9	72572409	72572409	-	1.00883e-07	0.000722007	-55.2632
chr9	73179192	73179192	-	1.95779e-06	0.00428613	72.7273
chr9	74439673	74439673	+	2.00764e-08	0.000261324	59.375
chr9	76027561	76027561	-	8.43505e-08	0.000648899	55.8824
chr9	77792450	77792450	-	2.96665e-05	0.0185581	54.4231
chr9	78960815	78960815	-	9.06862e-05	0.0328419	50.4902
chr9	81384029	81384029	+	4.43347e-09	0.000101243	63.3333
chr9	85128194	85128194	-	6.70439e-09	0.000132224	55.5556
chr9	88256830	88256830	-	1.23757e-05	0.0117625	54.5455
chr9	89854725	89854725	+	8.80797e-07	0.0027299	-58.8889
chr9	90223350	90223350	-	8.02014e-08	0.000630781	-64.7173
chr9	90663632	90663632	-	7.82475e-05	0.0305034	-50.5376
chr9	92441631	92441631	-	2.51541e-08	0.000303516	-56.994
chr9	92594299	92594299	-	1.06784e-05	0.0108601	52.5253
chr9	98736407	98736407	-	4.80609e-09	0.000106256	-56.6281
chr9	99467228	99467228	-	2.46246e-06	0.00487121	51.6129
chr9	100018075	100018075	-	5.44647e-07	0.00205639	-50.6571
chr9	101626556	101626556	-	9.991e-07	0.00293645	56.1261
chr9	102246563	102246563	-	4.19141e-07	0.00177875	51.8519
chr9	102332684	102332684	+	9.74011e-07	0.00288724	-54.0541
chr9	102333576	102333576	+	5.185e-08	0.000482938	55.1197
chr9	102421251	102421251	+	4.52416e-06	0.00681869	-51.9872
chr9	102637561	102637561	+	6.32446e-06	0.0081659	50.4762
chr9	105894016	105894016	+	2.72849e-05	0.0177925	51.7241
chr9	111485905	111485905	-	1.30311e-06	0.00339834	51.3043
chr9	111745332	111745332	+	2.90449e-06	0.00535122	60
chr9	111875293	111875293	-	1.21802e-08	0.000189542	-60
chr9	112617774	112617774	-	1.38915e-07	0.000875109	-55.1724
chr9	116674782	116674782	-	2.6382e-06	0.00506493	-54.0747
chr9	117280160	117280160	-	2.16209e-08	0.000275235	-53.3333
chr9	118642467	118642467	+	6.55024e-07	0.00229043	56.8182
chr9	119281206	119281206	-	7.60134e-10	3.09197e-05	-69.0476
chr9	121014947	121014947	-	1.33429e-06	0.00345627	-60.4072
chr9	121635688	121635688	+	5.87413e-08	0.000518399	60.9524
chrX	6518633	6518633	-	3.92378e-05	0.0214563	55
chrX	8079376	8079376	+	1.9587e-09	5.99892e-05	-68.2984
chrX	18829743	18829743	+	1.7307e-06	0.0040076	-62.8571
chrX	33334806	33334806	-	1.16705e-07	0.000786076	52.381
chrX	41710414	41710414	-	2.1351e-06	0.00449338	-56.4655
chrX	48095221	48095221	-	3.45551e-06	0.00589884	51.8519
chrX	54188958	54188958	+	7.02359e-05	0.0288204	52.5217
chrX	72992431	72992431	+	2.16054e-06	0.00452281	-58.4975
chrX	85454625	85454625	+	4.60734e-06	0.00689012	-53.5714
chrX	89771077	89771077	-	1.2389e-05	0.0117665	53.8462
chrX	95175075	95175075	+	1.4223e-05	0.0126835	-57.444
chrX	113445766	113445766	-	1.05401e-07	0.000740095	54.8387
chrX	134019274	134019274	-	9.45331e-10	3.57727e-05	-58.8235
chrX	146882777	146882777	-	7.14456e-05	0.0290457	-53.3333
chrX	161037246	161037246	+	1.94404e-06	0.00426903	51.7241
chrX	161789081	161789081	+	3.23742e-06	0.00568594	60
chrY	37898956	37898956	+	1.86422e-05	0.0145685	52.2727

## Sheet: mCHC (= mCCC, mCAC, and mCTC)
CHR	start	end	strand	P value	Q value	% Diff
chr1	3057457	3057457	+	2.8297e-06	0.00187927	57.1429
chr1	3681589	3681589	-	1.00647e-06	0.00100289	-52
chr1	4569900	4569900	+	8.12025e-06	0.00351909	-60.8696
chr1	6381084	6381084	-	1.25852e-07	0.000280631	-53.125
chr1	6499801	6499801	-	1.73139e-09	1.82533e-05	68.5714
chr1	6811460	6811460	+	1.91025e-11	8.2992e-07	71.4286
chr1	7779298	7779298	+	1.22534e-07	0.000276961	-51.2821
chr1	8652592	8652592	+	1.61407e-08	7.78114e-05	69.1176
chr1	9954909	9954909	-	1.32579e-07	0.000288649	69.4194
chr1	9969003	9969003	+	3.71196e-07	0.000542747	-54.5455
chr1	10919123	10919123	-	5.80899e-07	0.000713716	-62.5
chr1	11149741	11149741	-	6.35266e-06	0.00304865	53.125
chr1	11841876	11841876	-	4.59108e-07	0.000617914	55
chr1	12612030	12612030	+	2.41193e-11	9.64836e-07	78.7879
chr1	12939758	12939758	-	6.25918e-07	0.000747457	52
chr1	13193766	13193766	+	6.5124e-08	0.000185631	55.7018
chr1	13204050	13204050	+	3.3096e-13	3.94203e-08	-72.4868
chr1	13260615	13260615	+	6.26625e-09	4.28489e-05	55.1724
chr1	14232134	14232134	-	1.00647e-06	0.00100289	-52
chr1	14272378	14272378	+	1.07462e-06	0.00104245	52.3983
chr1	14564987	14564987	+	1.92007e-05	0.00584335	56.3348
chr1	14741774	14741774	+	0.000179635	0.0211253	50.9677
chr1	15416781	15416781	-	1.00044e-08	5.72571e-05	-62.5189
chr1	15895077	15895077	-	5.72089e-09	4.06744e-05	53.4884
chr1	16799910	16799910	+	6.02788e-08	0.000176812	52
chr1	17986836	17986836	-	9.71634e-11	2.60743e-06	63.6364
chr1	21216397	21216397	-	1.16761e-08	6.27978e-05	-50.891
chr1	21599916	21599916	-	4.97709e-05	0.0101381	50.9744
chr1	21659375	21659375	-	9.0808e-07	0.000938219	52.4865
chr1	22238184	22238184	+	5.81255e-09	4.1054e-05	-51.6129
chr1	23325493	23325493	+	1.12925e-07	0.000261888	-61.5741
chr1	23343905	23343905	+	5.20604e-06	0.00271353	56.6061
chr1	24176781	24176781	+	1.13278e-06	0.00107863	53.4181
chr1	24930270	24930270	-	3.6597e-06	0.00219755	50.7143
chr1	25888301	25888301	-	1.71399e-14	3.70807e-09	100
chr1	27535464	27535464	+	1.33721e-05	0.00471869	-55.4859
chr1	30117211	30117211	-	2.93974e-08	0.000113943	58.1395
chr1	30591882	30591882	+	2.39327e-07	0.000417139	-60.8734
chr1	31103348	31103348	-	1.23712e-07	0.000278495	59.375
chr1	31887012	31887012	+	4.55966e-07	0.00061527	67.4359
chr1	32394500	32394500	+	4.9793e-06	0.00264272	62.963
chr1	32509103	32509103	+	6.18817e-08	0.000179428	-59.0278
chr1	33965668	33965668	-	3.76043e-06	0.00223336	-50.5537
chr1	33976518	33976518	-	2.44035e-07	0.000422705	54.7988
chr1	34070574	34070574	+	6.26625e-09	4.28489e-05	55.1724
chr1	35191944	35191944	-	2.26708e-09	2.19076e-05	60.537
chr1	35494747	35494747	+	8.15837e-07	0.000876592	-58.3333
chr1	35587448	35587448	+	1.23495e-06	0.00113611	-64.4955
chr1	35676177	35676177	-	4.63764e-07	0.000621206	51.6129
chr1	35718385	35718385	+	4.30997e-06	0.00242458	57.7419
chr1	35872792	35872792	-	5.96538e-07	0.000725947	-57.3743
chr1	35994611	35994611	-	6.86466e-07	0.000788582	50.8586
chr1	36271864	36271864	-	7.3012e-06	0.00330619	54.9819
chr1	36558496	36558496	+	1.0995e-06	0.00105853	51.7241
chr1	36634604	36634604	-	0.000103321	0.0154685	51.5915
chr1	36761970	36761970	-	1.1851e-06	0.00110589	-56.4103
chr1	36761979	36761979	-	4.55784e-05	0.00965884	-54.4872
chr1	36780504	36780504	+	0.000119307	0.0168042	57.4275
chr1	37124114	37124114	-	1.20777e-06	0.00111824	-52.1739
chr1	37319146	37319146	-	0.000448516	0.0350269	51.7081
chr1	37336033	37336033	-	1.68558e-09	1.80627e-05	-51.6903
chr1	37582689	37582689	+	1.42337e-07	0.000302314	55.5556
chr1	37916419	37916419	-	5.3088e-07	0.000676407	52.1429
chr1	37917726	37917726	-	2.94161e-05	0.0075001	54.1667
chr1	38147679	38147679	+	8.60456e-06	0.00363752	53.6855
chr1	38326154	38326154	-	4.14428e-08	0.000140539	-65.1429
chr1	39389794	39389794	+	8.57451e-07	0.000905789	51.9888
chr1	39412282	39412282	-	3.46392e-06	0.00212501	-56.7398
chr1	39419250	39419250	-	2.1275e-06	0.00158296	-53.2723
chr1	39811663	39811663	+	1.70182e-07	0.000337544	-53.8537
chr1	39825727	39825727	+	2.99613e-06	0.00194971	-54.0541
chr1	39960717	39960717	-	1.08038e-05	0.00415486	53.3333
chr1	40328842	40328842	-	3.22825e-08	0.000121734	-60.7652
chr1	40803970	40803970	-	4.7994e-07	0.000635177	69.4316
chr1	40914963	40914963	+	5.22901e-06	0.00271885	-56.3492
chr1	41121012	41121012	+	6.77527e-05	0.0121341	-55.7143
chr1	41210636	41210636	+	0.000117509	0.0166562	-53.0769
chr1	41290216	41290216	+	1.89223e-05	0.00578821	58.288
chr1	42447487	42447487	-	3.36703e-06	0.00208548	58.9655
chr1	42709655	42709655	+	6.44119e-08	0.00018451	52.8822
chr1	42712568	42712568	+	5.56131e-07	0.000695457	54.4258
chr1	42733171	42733171	-	3.17129e-05	0.00782924	56.4935
chr1	43293679	43293679	-	1.56949e-09	1.72412e-05	-57.8947
chr1	45158071	45158071	+	1.80143e-05	0.00563632	-51.1905
chr1	45310213	45310213	-	2.87312e-07	0.000465678	61.449
chr1	46322623	46322623	+	4.56348e-10	7.69096e-06	-61.7021
chr1	47020169	47020169	+	4.71553e-07	0.000627911	-65.9938
chr1	50595347	50595347	-	9.34995e-11	2.53494e-06	68.1818
chr1	51596214	51596214	-	1.05738e-07	0.00025189	-55.5556
chr1	51830197	51830197	-	4.57363e-05	0.00967914	51.8519
chr1	51921112	51921112	-	7.66682e-07	0.00084505	56.1469
chr1	52628208	52628208	+	1.70146e-07	0.000337544	-61.3725
chr1	52729101	52729101	-	5.03407e-08	0.000157562	-56.25
chr1	54069543	54069543	+	1.12652e-09	1.38461e-05	-67.8571
chr1	54592850	54592850	+	1.28815e-06	0.00116136	-56.044
chr1	54746868	54746868	+	2.06864e-05	0.00610891	-53.8462
chr1	54815461	54815461	-	0.000182776	0.0213274	-50.4963
chr1	54936418	54936418	-	1.72802e-05	0.00548891	57.6087
chr1	55199985	55199985	+	1.60362e-05	0.0052521	53.3061
chr1	55511366	55511366	+	2.241e-06	0.00163602	-50.4327
chr1	55685573	55685573	-	6.25187e-06	0.00301988	-51.9466
chr1	55717368	55717368	+	8.37824e-07	0.000893066	-58.5714
chr1	55797715	55797715	-	4.62102e-07	0.000620313	54.5455
chr1	55823488	55823488	-	1.49361e-05	0.00504486	52.0833
chr1	56039969	56039969	-	1.0919e-05	0.00417929	53.8462
chr1	56371999	56371999	+	3.48142e-06	0.00213206	-51.2821
chr1	56543502	56543502	-	1.31462e-07	0.000287161	55.9878
chr1	56902001	56902001	+	1.59266e-05	0.00523076	-58.6151
chr1	56965355	56965355	-	3.46436e-06	0.00212503	-55.4878
chr1	57472095	57472095	+	1.31582e-07	0.000287259	-58.631
chr1	57545781	57545781	+	3.75313e-05	0.00861688	-55.9524
chr1	57783632	57783632	+	3.08153e-07	0.000486296	64.9798
chr1	57786215	57786215	+	4.0609e-10	7.13904e-06	69.7154
chr1	57868313	57868313	-	3.4831e-08	0.000127322	53.3636
chr1	57868323	57868323	-	3.23356e-11	1.19021e-06	69.3617
chr1	57883399	57883399	+	8.15078e-06	0.00352512	52.7778
chr1	57911163	57911163	-	7.55645e-06	0.00337507	52.9412
chr1	57988083	57988083	-	1.40202e-05	0.00484559	50.974
chr1	58048495	58048495	-	1.66401e-05	0.00536258	54.1872
chr1	59942996	59942996	+	9.33955e-06	0.00381776	51.7241
chr1	60806163	60806163	+	9.9654e-11	2.6504e-06	73.913
chr1	60932084	60932084	-	5.40595e-09	3.93592e-05	-54.8387
chr1	61684208	61684208	+	4.41393e-07	0.000602566	62.963
chr1	61715070	61715070	+	1.01154e-08	5.77265e-05	-55.1818
chr1	62625809	62625809	+	4.6838e-08	0.000150412	55.5556
chr1	62646197	62646197	+	8.37698e-06	0.00357252	57.197
chr1	62658063	62658063	+	1.38588e-05	0.0048113	51.8519
chr1	62932794	62932794	+	5.5177e-07	0.000691518	-51.4739
chr1	62965820	62965820	-	1.92181e-05	0.00584397	53.6398
chr1	63314180	63314180	-	1.55996e-07	0.000320976	-68.1818
chr1	63444579	63444579	-	6.23369e-07	0.000745534	57.5758
chr1	63786930	63786930	-	7.33847e-05	0.0127244	-56.5831
chr1	63976634	63976634	-	1.24944e-06	0.00114517	-57.3269
chr1	64162082	64162082	-	3.44812e-06	0.00211898	57.6923
chr1	64331696	64331696	-	5.94567e-07	0.000724214	-62.963
chr1	64637540	64637540	-	9.46457e-08	0.000235627	-57.5758
chr1	64751434	64751434	+	1.80164e-06	0.00143314	-56.5217
chr1	64804538	64804538	-	2.79176e-06	0.0018654	58.4821
chr1	64909881	64909881	+	2.39379e-06	0.00170216	-60.7417
chr1	67117909	67117909	-	6.18058e-06	0.00299541	-52
chr1	68774426	68774426	-	0.000325523	0.0293591	-50.1437
chr1	69137219	69137219	-	3.57823e-07	0.000531035	61.5385
chr1	69317872	69317872	+	9.05838e-09	5.38862e-05	-57.8671
chr1	69592932	69592932	-	9.51264e-08	0.000235995	58.6483
chr1	69647533	69647533	+	3.65151e-05	0.00848744	56.401
chr1	70068728	70068728	-	2.19915e-06	0.00161714	53.3333
chr1	70490700	70490700	+	7.69149e-11	2.20366e-06	51.1111
chr1	70783751	70783751	+	5.1e-06	0.00268014	52.8017
chr1	70841167	70841167	-	5.84145e-06	0.00290803	51.7241
chr1	71490669	71490669	+	4.02376e-07	0.000569742	-53.5714
chr1	71515719	71515719	-	2.99194e-08	0.00011525	69.6833
chr1	71798709	71798709	-	6.78745e-06	0.00316469	50.0701
chr1	72138269	72138269	+	3.92542e-06	0.0022927	-50.85
chr1	72179304	72179304	-	5.62746e-07	0.000700743	55.1555
chr1	72391871	72391871	-	3.72018e-07	0.000543353	55.9524
chr1	72598821	72598821	-	4.40509e-06	0.00245227	-54.3651
chr1	73219534	73219534	-	8.85228e-05	0.0141433	51.1921
chr1	73436016	73436016	+	8.7418e-06	0.00367313	-53.4199
chr1	73615394	73615394	+	2.13761e-08	9.21211e-05	-51.9268
chr1	73928874	73928874	-	4.30373e-05	0.00930941	50.5445
chr1	74086719	74086719	+	7.53582e-07	0.000835624	-50.8333
chr1	74297541	74297541	-	2.13437e-05	0.00621759	50.1748
chr1	74548773	74548773	+	1.66166e-05	0.00535828	-51.7609
chr1	74955506	74955506	+	2.55268e-06	0.00176657	53.4392
chr1	75023770	75023770	+	2.29957e-07	0.000406353	63.0499
chr1	75341916	75341916	-	1.31406e-07	0.000287097	59.5139
chr1	75622066	75622066	+	7.17066e-07	0.000809781	54.8387
chr1	75765109	75765109	-	6.30603e-06	0.00303691	50.069
chr1	76949524	76949524	+	1.94223e-05	0.00587401	-52.5467
chr1	77038522	77038522	+	2.66602e-06	0.00181549	63.1965
chr1	77172791	77172791	-	3.358e-07	0.00050977	-55.6522
chr1	77632119	77632119	+	2.57671e-07	0.000437281	52.7778
chr1	77768815	77768815	+	8.61773e-06	0.00364149	53.3333
chr1	78011696	78011696	-	8.29526e-06	0.00355339	-50.3676
chr1	78431349	78431349	+	2.26246e-05	0.00642531	-50.2801
chr1	79709811	79709811	+	7.49213e-06	0.0033551	52.5629
chr1	79872062	79872062	-	5.34316e-10	8.46656e-06	-60.0529
chr1	80158203	80158203	+	3.69357e-06	0.00220937	53.0435
chr1	80544516	80544516	-	6.92185e-07	0.000791976	54.1126
chr1	81121634	81121634	-	7.31192e-07	0.000820252	-55.2288
chr1	82374238	82374238	-	4.63342e-07	0.000621113	-53.0702
chr1	83895515	83895515	+	3.2416e-05	0.00791999	54.9407
chr1	84015822	84015822	+	2.65291e-10	5.20792e-06	62.1702
chr1	84216303	84216303	+	7.9081e-06	0.00346484	50.662
chr1	84367301	84367301	-	2.25054e-07	0.000400903	59.5238
chr1	85755746	85755746	+	1.19319e-05	0.00441227	62.3512
chr1	87257117	87257117	+	1.82042e-08	8.37942e-05	-55.9929
chr1	87268339	87268339	-	2.58649e-05	0.00694425	53.5714
chr1	87694172	87694172	-	8.23861e-05	0.0135738	50.5495
chr1	87790419	87790419	-	8.51684e-06	0.00361428	52.1739
chr1	88449992	88449992	-	9.27119e-10	1.22088e-05	-56
chr1	88658939	88658939	-	1.10314e-06	0.0010605	58.0952
chr1	88659121	88659121	+	2.8921e-06	0.00190756	-56.0484
chr1	88953317	88953317	+	1.46087e-06	0.00125598	57.1429
chr1	89203492	89203492	-	0.000173902	0.0207198	52.2409
chr1	89278334	89278334	+	4.50496e-07	0.000610298	-58.3333
chr1	89332670	89332670	-	2.57158e-07	0.000436687	-51.6667
chr1	89492809	89492809	-	4.99767e-07	0.000650447	-58.9744
chr1	89556648	89556648	-	9.87525e-08	0.000242033	51.8298
chr1	89602211	89602211	-	1.53716e-07	0.00031818	57.5448
chr1	89669159	89669159	+	9.25752e-08	0.000232241	-51.5597
chr1	89684911	89684911	-	5.35604e-08	0.000164288	50.8943
chr1	90001964	90001964	-	1.24372e-05	0.0045175	-51.8717
chr1	90132147	90132147	-	7.57831e-07	0.000838483	53.3333
chr1	90231438	90231438	+	2.42798e-07	0.000421298	-54.2857
chr1	90234519	90234519	-	6.66723e-08	0.000188323	-71.4286
chr1	90313370	90313370	-	5.41182e-07	0.000684024	60.2049
chr1	90313716	90313716	+	0.000183287	0.0213578	52.9221
chr1	90324632	90324632	-	3.24325e-09	2.74388e-05	65.1032
chr1	90924249	90924249	+	2.3243e-10	4.80188e-06	56
chr1	90969641	90969641	+	8.79789e-08	0.00022457	-60
chr1	91525013	91525013	+	2.05523e-07	0.000378771	-51.489
chr1	91600401	91600401	-	1.524e-05	0.00510349	57.3718
chr1	91616265	91616265	-	9.85573e-06	0.00394072	-52.0968
chr1	91730706	91730706	+	5.06808e-06	0.00267037	52.1739
chr1	91830054	91830054	-	1.46355e-05	0.00497635	-55.1282
chr1	91909699	91909699	+	0.000114082	0.0163647	-57.4194
chr1	91935608	91935608	+	9.12468e-08	0.000230479	-51.4286
chr1	92283183	92283183	+	3.75097e-07	0.000546871	-50.6343
chr1	92436336	92436336	+	0.000143637	0.0186436	-50.2632
chr1	92698661	92698661	-	1.50132e-06	0.00127791	63.6364
chr1	92713494	92713494	+	8.35775e-06	0.00356948	-53.3696
chr1	92784879	92784879	+	8.69534e-08	0.000222865	56.1404
chr1	92889511	92889511	-	2.14808e-09	2.12815e-05	-63.4211
chr1	93132568	93132568	+	4.00781e-08	0.00013812	52.9412
chr1	93142082	93142082	+	5.3116e-10	8.4402e-06	-69.697
chr1	93185393	93185393	+	1.39958e-07	0.000299305	50.4103
chr1	93252402	93252402	+	9.00226e-07	0.000934584	-61.5152
chr1	93255128	93255128	+	2.06864e-05	0.00610891	53.8462
chr1	96953848	96953848	-	4.68784e-07	0.000625246	58.0645
chr1	101004855	101004855	+	3.34155e-05	0.00806806	50.7576
chr1	102176814	102176814	-	1.43297e-05	0.00491032	54.0887
chr1	102449169	102449169	+	1.67532e-07	0.000334151	-54.7222
chr1	103654515	103654515	-	2.03239e-08	8.9028e-05	56.25
chr1	104362454	104362454	-	5.21357e-06	0.00271389	51.7241
chr1	105168515	105168515	+	9.78824e-05	0.0149894	53.3248
chr1	105269394	105269394	-	5.73637e-05	0.0110007	-50.8621
chr1	105349586	105349586	+	9.86947e-07	0.000990096	54.2857
chr1	105545943	105545943	-	3.16317e-07	0.000492387	58.8417
chr1	105591621	105591621	+	1.90576e-05	0.00581521	-51.2311
chr1	106139978	106139978	-	7.29329e-05	0.0126709	52.6437
chr1	106158189	106158189	-	1.87707e-07	0.000358559	-60.8696
chr1	106610948	106610948	+	7.61529e-07	0.000841273	60
chr1	106630735	106630735	-	2.15903e-05	0.00625524	51.9592
chr1	106697561	106697561	+	1.41679e-11	6.76122e-07	54.4745
chr1	106704996	106704996	+	6.1475e-08	0.000178836	66.6667
chr1	106709847	106709847	-	2.09374e-06	0.00156624	-61.7424
chr1	106871730	106871730	-	9.41869e-06	0.00383797	-51.6129
chr1	108453529	108453529	+	1.58575e-07	0.000324268	-50.9028
chr1	113702321	113702321	+	2.37805e-09	2.26904e-05	63.4146
chr1	113880588	113880588	-	6.31724e-11	1.9524e-06	60.1389
chr1	114415938	114415938	-	4.95891e-08	0.000156326	66.4444
chr1	114418328	114418328	+	2.27045e-05	0.00643634	51.7241
chr1	118914942	118914942	+	4.69717e-06	0.0025541	58.8235
chr1	118944820	118944820	+	0.000342809	0.0302213	51.0417
chr1	118981231	118981231	+	3.01649e-12	2.22249e-07	69.2392
chr1	119194001	119194001	-	7.27905e-08	0.000199698	-53.5014
chr1	119195635	119195635	+	0.000101993	0.0153416	50.5388
chr1	119594008	119594008	+	1.42714e-06	0.00123877	62.8571
chr1	119887690	119887690	+	1.13601e-10	2.91587e-06	-63.6364
chr1	120169549	120169549	+	1.95753e-06	0.00150868	-57.4074
chr1	120766319	120766319	+	1.02103e-05	0.00402648	-57.1154
chr1	120802608	120802608	-	3.5251e-07	0.000526096	61.0679
chr1	121101059	121101059	-	2.984e-05	0.00755482	-56.266
chr1	121284315	121284315	+	1.71967e-07	0.000339854	-56.6558
chr1	121617886	121617886	+	1.73208e-08	8.09009e-05	-58.3869
chr1	122430855	122430855	+	1.97566e-05	0.00593364	-57.1839
chr1	122597387	122597387	+	0.000163721	0.0200601	52.8846
chr1	122853014	122853014	+	2.64763e-07	0.000442833	-61.1643
chr1	123923174	123923174	-	8.20208e-08	0.000215252	73.5484
chr1	124750061	124750061	-	3.5724e-06	0.00216784	53.125
chr1	125125083	125125083	+	1.52888e-05	0.0051106	53.9886
chr1	125792200	125792200	-	4.05561e-07	0.000573021	54.0031
chr1	125965850	125965850	-	7.91238e-06	0.00346513	50.3788
chr1	125989433	125989433	-	1.21059e-05	0.00445408	52.381
chr1	126086942	126086942	-	3.10632e-05	0.00773459	-58.3333
chr1	126105697	126105697	+	0.000118142	0.016699	-54.7619
chr1	126143426	126143426	-	4.19308e-08	0.000141667	62.596
chr1	127235208	127235208	-	1.27359e-08	6.66055e-05	60.2256
chr1	127386457	127386457	+	9.99984e-08	0.000243971	54
chr1	127412164	127412164	-	4.83156e-05	0.00997168	50.6934
chr1	127648312	127648312	+	2.83886e-08	0.000111295	67.0778
chr1	127697231	127697231	-	5.50025e-07	0.000690182	-57.684
chr1	129853748	129853748	+	7.74914e-07	0.000849674	61.9048
chr1	130908896	130908896	-	1.79269e-08	8.28773e-05	-53.6585
chr1	131259353	131259353	+	7.42254e-08	0.000202169	-56.7855
chr1	131740455	131740455	-	7.89727e-10	1.09865e-05	61.5385
chr1	131949892	131949892	+	5.9142e-05	0.0112061	-52.5
chr1	132070409	132070409	-	1.10151e-07	0.00025788	57.1429
chr1	132192438	132192438	-	1.59388e-06	0.00132717	52.9412
chr1	132227398	132227398	+	3.16426e-05	0.00782037	-50.5366
chr1	132305527	132305527	-	4.57802e-05	0.00968395	-55.4113
chr1	132335070	132335070	+	3.1442e-11	1.1695e-06	-59.4737
chr1	132535181	132535181	-	2.90548e-09	2.57742e-05	-61.6071
chr1	132750507	132750507	-	4.87444e-07	0.00064034	-62.2222
chr1	132801710	132801710	-	6.36563e-08	0.000183042	66.6667
chr1	132885083	132885083	-	7.9674e-08	0.000210887	59.375
chr1	133087274	133087274	-	4.30544e-07	0.000593045	65.1852
chr1	133204687	133204687	+	2.27919e-07	0.000403963	54.4715
chr1	133479980	133479980	+	9.2211e-06	0.00378877	65.6522
chr1	133860106	133860106	-	6.40245e-06	0.00306381	-52.1671
chr1	133862269	133862269	+	4.61974e-08	0.000149522	-70.0119
chr1	134026089	134026089	-	8.52876e-07	0.000903658	-54.5
chr1	134034668	134034668	+	1.29937e-08	6.76534e-05	-63.1813
chr1	134045417	134045417	+	3.27733e-07	0.000502299	-51.8056
chr1	134152634	134152634	+	3.47483e-05	0.00824812	52.381
chr1	134383358	134383358	-	2.20847e-06	0.00162253	52.9762
chr1	134726408	134726408	+	4.11747e-08	0.000140033	63.0031
chr1	135031324	135031324	-	5.50986e-05	0.0107513	54.4335
chr1	135119841	135119841	+	1.12647e-07	0.000261542	51.5152
chr1	135134453	135134453	-	5.13293e-09	3.78392e-05	-59.4595
chr1	135823235	135823235	+	2.36274e-06	0.0016912	-62.2549
chr1	136117198	136117198	-	4.76542e-08	0.000152159	-68.8063
chr1	136155080	136155080	-	4.6838e-08	0.000150412	55.5556
chr1	136566605	136566605	-	4.6838e-08	0.000150412	-55.5556
chr1	136586727	136586727	-	2.23087e-07	0.000399676	-56.6667
chr1	137483292	137483292	+	1.24915e-13	1.80378e-08	74.9513
chr1	138298323	138298323	+	4.13866e-06	0.00236498	56.25
chr1	138617404	138617404	+	3.66042e-07	0.000537588	-53.617
chr1	138934288	138934288	-	4.63301e-05	0.00973839	-51.5345
chr1	138934290	138934290	-	5.24529e-05	0.0104682	-53.0962
chr1	138969889	138969889	-	5.50986e-05	0.0107513	55.1724
chr1	139333083	139333083	+	3.25984e-08	0.000122195	-55.2608
chr1	139771866	139771866	+	2.14613e-05	0.00623637	52.0499
chr1	141527896	141527896	-	8.30767e-10	1.13489e-05	-51.2626
chr1	141655289	141655289	+	2.963e-10	5.59891e-06	-56.7568
chr1	141772984	141772984	-	2.48818e-05	0.00678564	66.1905
chr1	143514893	143514893	+	8.62355e-07	0.000909972	50.9413
chr1	144415991	144415991	+	3.72272e-05	0.0085737	50.9828
chr1	144420212	144420212	+	5.898e-08	0.000174392	65.3571
chr1	146661837	146661837	+	2.98955e-07	0.000477208	-50.1923
chr1	147422218	147422218	+	2.67934e-06	0.0018203	56.015
chr1	149374521	149374521	+	7.03416e-06	0.00323895	-54.1667
chr1	149755505	149755505	-	1.52208e-06	0.00128752	-56.7568
chr1	150509336	150509336	+	0.000203319	0.0226124	51.0989
chr1	150676913	150676913	+	9.04229e-08	0.000229153	50.3154
chr1	151005843	151005843	+	1.67585e-08	7.9451e-05	-61.086
chr1	151006651	151006651	+	2.42142e-06	0.00171296	52.1739
chr1	151127904	151127904	+	2.19385e-07	0.00039577	54.7686
chr1	151828979	151828979	+	8.28571e-07	0.000886178	-60.5769
chr1	152306314	152306314	-	1.64984e-05	0.00533688	51.7857
chr1	152327215	152327215	+	1.2382e-08	6.53587e-05	-50.9486
chr1	152680046	152680046	+	7.64259e-05	0.0130087	51.401
chr1	154031138	154031138	-	2.35429e-05	0.00658325	52.4725
chr1	154067351	154067351	-	5.3852e-06	0.00276584	53.9394
chr1	154880692	154880692	+	1.08703e-07	0.000256302	-60.7143
chr1	155011392	155011392	+	7.43344e-06	0.00333699	55
chr1	155297878	155297878	+	3.05409e-05	0.00766159	53.5
chr1	155484089	155484089	+	1.58986e-09	1.73998e-05	51.9985
chr1	155795163	155795163	+	3.07628e-09	2.67301e-05	51.7728
chr1	156936299	156936299	+	1.48412e-06	0.00126817	-51.7672
chr1	156985863	156985863	-	4.37021e-06	0.00244291	-56.0714
chr1	157823467	157823467	-	1.0919e-05	0.00417929	-52
chr1	158732122	158732122	+	1.79211e-07	0.000349287	-61.0723
chr1	159502993	159502993	-	2.0522e-06	0.0015486	60.6349
chr1	159563516	159563516	+	1.0476e-05	0.00408474	50.5556
chr1	159595962	159595962	-	4.59149e-07	0.000617914	54.6622
chr1	159842400	159842400	+	1.12973e-06	0.00107688	57.8571
chr1	160057494	160057494	-	2.74292e-05	0.00719695	58.1429
chr1	160067101	160067101	-	3.17162e-07	0.000492492	62.1588
chr1	160788320	160788320	+	1.09865e-07	0.000257607	-60
chr1	161227948	161227948	-	2.58945e-07	0.000437908	57.1429
chr1	162139525	162139525	-	6.15123e-10	9.18415e-06	73.2468
chr1	162144011	162144011	+	2.47086e-06	0.0017344	-57.2464
chr1	162147775	162147775	+	3.35845e-05	0.00809156	-50.6723
chr1	162281036	162281036	+	2.0168e-14	4.03387e-09	59.2105
chr1	162319849	162319849	-	2.88065e-06	0.00190214	-55.5556
chr1	162329723	162329723	-	1.46654e-07	0.00030894	57.8788
chr1	162510159	162510159	-	2.28518e-09	2.20223e-05	-56.3193
chr1	164355599	164355599	+	5.60934e-09	4.0137e-05	60.4567
chr1	165192647	165192647	-	4.01273e-09	3.16279e-05	71.6734
chr1	165680074	165680074	+	7.87162e-08	0.000209502	-61.7647
chr1	165686990	165686990	+	2.22492e-05	0.00637109	56.746
chr1	166057744	166057744	-	4.98518e-06	0.00264477	51.737
chr1	166215336	166215336	+	9.83655e-06	0.00393548	51.2821
chr1	166236959	166236959	-	4.62724e-06	0.00253389	-56.5412
chr1	166778758	166778758	-	1.4132e-06	0.00123188	-50.8547
chr1	167031356	167031356	-	5.68054e-09	4.05234e-05	62.8571
chr1	167115787	167115787	+	2.8921e-06	0.00190756	56.25
chr1	167695061	167695061	-	4.21898e-05	0.00921485	53.4392
chr1	168543503	168543503	-	5.4947e-08	0.000167378	-58.0357
chr1	168712515	168712515	-	8.60867e-08	0.000221393	-62.963
chr1	169137013	169137013	+	1.06892e-07	0.000253725	-61.3122
chr1	169360011	169360011	+	2.34976e-05	0.00657876	-59.2593
chr1	170559014	170559014	-	5.25882e-08	0.000162745	-54.1667
chr1	170932362	170932362	-	1.08431e-08	6.00548e-05	-68.9655
chr1	171507916	171507916	-	6.59121e-08	0.000186837	60
chr1	172227297	172227297	+	1.38359e-06	0.0012189	-53.8564
chr1	172246966	172246966	+	1.31158e-10	3.24095e-06	71.562
chr1	172323549	172323549	-	4.71003e-07	0.000627495	-56.4103
chr1	172568833	172568833	-	9.00517e-07	0.000934795	51.6667
chr1	173310926	173310926	-	4.52416e-06	0.00249632	52.1879
chr1	175037969	175037969	+	5.94099e-07	0.000723811	62.6667
chr1	175667973	175667973	-	0.000397022	0.0328148	53.3333
chr1	175678366	175678366	-	4.68784e-07	0.000625246	58.0645
chr1	175705256	175705256	-	8.78104e-07	0.000920453	-58.7838
chr1	175792963	175792963	-	9.17363e-08	0.000231397	61.5385
chr1	175792980	175792980	-	4.28447e-12	2.82102e-07	84.6154
chr1	175935013	175935013	+	7.31192e-07	0.000820252	-61.2319
chr1	175999506	175999506	-	1.60853e-05	0.00526364	50.5515
chr1	176675020	176675020	+	0.000129599	0.0175746	-53.7815
chr1	177277757	177277757	+	4.60734e-06	0.00252707	51.8519
chr1	177675065	177675065	+	8.55283e-08	0.000220545	-56.7568
chr1	178673825	178673825	-	8.2097e-06	0.00353358	-54.9872
chr1	178701688	178701688	-	2.87797e-06	0.00190108	-57.1111
chr1	178791750	178791750	+	2.78813e-07	0.000457171	52.9568
chr1	179117727	179117727	+	2.27711e-06	0.00165166	58.6207
chr1	179151438	179151438	+	8.00593e-09	4.97324e-05	52.9412
chr1	179380953	179380953	+	6.84032e-06	0.00317827	58.7963
chr1	179417869	179417869	+	3.51448e-08	0.000127917	-57.6829
chr1	179450258	179450258	+	3.56447e-12	2.50238e-07	63.6364
chr1	179572009	179572009	+	7.14901e-08	0.000197407	64.1561
chr1	179975949	179975949	+	2.50657e-07	0.000429681	54.0541
chr1	180173340	180173340	-	1.29757e-07	0.000285089	51.1111
chr1	180376301	180376301	-	2.44334e-07	0.00042296	51.1628
chr1	180401927	180401927	+	2.26794e-08	9.59754e-05	-55.2632
chr1	180419264	180419264	+	6.18058e-06	0.00299541	-52
chr1	180548256	180548256	+	1.27904e-07	0.000283477	54.2857
chr1	180881188	180881188	+	4.2342e-08	0.000142499	56.6667
chr1	181391860	181391860	-	1.88782e-08	8.56846e-05	53.7547
chr1	181405357	181405357	+	2.199e-06	0.00161714	-51.6129
chr1	181412638	181412638	-	5.47959e-09	3.96119e-05	-55.5275
chr1	181845427	181845427	+	6.35678e-06	0.00304896	53.7582
chr1	182191201	182191201	-	6.74449e-09	4.48641e-05	-65.5172
chr1	182223734	182223734	+	3.25864e-08	0.000122193	56.5315
chr1	182585048	182585048	+	1.68596e-06	0.00137511	-50.6127
chr1	182612055	182612055	+	6.78038e-11	2.03546e-06	-69.494
chr1	182750245	182750245	+	0.000210092	0.0230364	51.4286
chr1	182937388	182937388	+	1.46087e-06	0.00125598	57.1429
chr1	183122658	183122658	+	3.53418e-09	2.89751e-05	-74.0857
chr1	183122660	183122660	+	3.94919e-05	0.00888649	-52.4556
chr1	183252254	183252254	+	3.40305e-06	0.00210165	-71.1905
chr1	183431579	183431579	-	6.80777e-09	4.51327e-05	55.7655
chr1	183549200	183549200	-	8.87235e-05	0.0141581	52.5
chr1	183784797	183784797	-	1.8198e-05	0.00565699	51.6522
chr1	183928778	183928778	+	1.07699e-05	0.00414556	-51.4286
chr1	184098765	184098765	-	3.85929e-07	0.000557174	51.4184
chr1	184181711	184181711	-	7.69072e-05	0.0130533	52.5974
chr1	184220006	184220006	-	1.91041e-09	1.9548e-05	-51.7857
chr1	184662384	184662384	+	5.47457e-07	0.000688182	62.2989
chr1	184829034	184829034	-	3.18335e-05	0.0078486	50.2525
chr1	184928066	184928066	-	6.94966e-05	0.0123068	52.1739
chr1	185823202	185823202	-	9.6958e-08	0.000239084	59.744
chr1	185829564	185829564	-	1.10258e-07	0.000258017	57.1053
chr1	186218958	186218958	+	2.47365e-07	0.000426173	63.6364
chr1	186410442	186410442	-	1.03947e-06	0.00102171	52.924
chr1	186819961	186819961	-	1.35448e-06	0.00120142	55.6322
chr1	186894175	186894175	+	1.55215e-06	0.00130349	61.5484
chr1	186908023	186908023	+	2.6733e-07	0.00044565	-59.6241
chr1	187007897	187007897	-	3.85329e-07	0.00055687	50.4708
chr1	187053511	187053511	+	1.44575e-10	3.44404e-06	53.3333
chr1	187967863	187967863	-	1.0919e-05	0.00417929	52
chr1	188023167	188023167	+	2.37428e-06	0.00169575	53.5417
chr1	188110775	188110775	+	1.08283e-07	0.000255823	-53.5714
chr1	188425021	188425021	+	1.10522e-10	2.84372e-06	86.2069
chr1	188435616	188435616	-	1.99966e-07	0.000372343	60.7065
chr1	188451936	188451936	+	8.51221e-06	0.00361304	-51.1111
chr1	188484826	188484826	+	1.63976e-06	0.00135004	51.2054
chr1	188523356	188523356	-	8.51805e-06	0.00361436	53.0531
chr1	188679674	188679674	-	1.1542e-06	0.00108835	-56.3218
chr1	188804349	188804349	+	2.85028e-08	0.000111536	69.9394
chr1	188851878	188851878	+	4.83783e-07	0.000638152	54.1667
chr1	189177996	189177996	+	2.10339e-05	0.00617165	54.9569
chr1	189188052	189188052	-	2.39231e-05	0.00664908	50.1661
chr1	189418487	189418487	+	5.03407e-08	0.000157562	56.25
chr1	189531131	189531131	+	2.79685e-07	0.000457772	-59.087
chr1	189766871	189766871	+	4.87867e-10	8.0182e-06	61.5385
chr1	189771400	189771400	-	5.11547e-07	0.000660588	53.38
chr1	189810812	189810812	+	8.18212e-06	0.00352787	-50.8159
chr1	189843227	189843227	+	9.28415e-09	5.45558e-05	71.0407
chr1	189908858	189908858	+	1.27904e-07	0.000283477	-54.2857
chr1	190134074	190134074	-	6.09467e-06	0.00297169	-55.4779
chr1	190333545	190333545	-	1.15623e-07	0.000266281	67.7346
chr1	190387554	190387554	-	4.31668e-08	0.000143854	-62.2222
chr1	190445937	190445937	+	3.92772e-08	0.000136693	-52.2642
chr1	190669634	190669634	-	5.79286e-07	0.000712147	-56
chr1	190759504	190759504	-	9.11832e-06	0.00376507	-57.085
chr1	190963481	190963481	+	8.20904e-07	0.000880608	51.5428
chr1	190975685	190975685	+	3.16656e-05	0.00782167	50.6944
chr1	191100542	191100542	+	2.94765e-05	0.0075045	-50.8224
chr1	191140278	191140278	+	1.04167e-10	2.72627e-06	-78.3333
chr1	191660660	191660660	-	8.48525e-09	5.16359e-05	-63.7153
chr1	191853606	191853606	-	1.28486e-06	0.00115978	-52
chr1	191945551	191945551	-	2.93597e-09	2.59146e-05	-58.6207
chr1	192148692	192148692	+	1.40173e-06	0.00122562	-59.0909
chr1	192426843	192426843	+	5.19351e-07	0.000667009	-54.497
chr1	192664243	192664243	+	0.000562893	0.0395757	50.5051
chr1	192719935	192719935	+	1.39362e-05	0.00482516	54.5455
chr1	192783861	192783861	+	2.54026e-06	0.00176223	-50.1176
chr1	192793156	192793156	-	1.71166e-07	0.000338776	68.0824
chr1	192800124	192800124	-	4.60734e-06	0.00252707	53.5714
chr1	193198852	193198852	-	4.12378e-08	0.000140067	60
chr1	193369559	193369559	-	1.51613e-06	0.00128461	52.1739
chr1	193451268	193451268	-	1.80071e-07	0.000350446	55.8874
chr1	193686460	193686460	-	3.74818e-06	0.00222934	-51.6667
chr1	193696871	193696871	+	1.62358e-05	0.00528872	-55.9341
chr1	193733297	193733297	+	2.55335e-09	2.36669e-05	59.9034
chr1	193868378	193868378	+	8.34529e-07	0.00089027	-52.2188
chr1	193928245	193928245	-	3.76868e-07	0.000548849	56
chr1	194307036	194307036	+	6.56393e-16	2.04654e-10	91.3043
chr1	194442122	194442122	-	5.03468e-08	0.000157562	56.3397
chr10	4095412	4095412	-	1.86835e-05	0.00573952	53.2915
chr10	4426996	4426996	-	4.13688e-06	0.00236494	-57.6852
chr10	5000163	5000163	+	4.92856e-07	0.000645016	-55.7808
chr10	5648194	5648194	-	1.42829e-06	0.00123923	-51.2117
chr10	6890674	6890674	+	8.18855e-07	0.000879478	-54.8387
chr10	6965205	6965205	+	1.76303e-07	0.000344838	52.4675
chr10	7014666	7014666	+	3.74818e-06	0.00222934	52.5397
chr10	7178250	7178250	-	1.73077e-06	0.00139811	58.0214
chr10	7189115	7189115	+	2.21355e-05	0.00635105	-53.8829
chr10	7190490	7190490	+	1.0578e-05	0.00410795	-50.9091
chr10	8064801	8064801	-	3.40604e-07	0.000513752	55.303
chr10	8186464	8186464	-	1.29813e-07	0.000285144	66.5882
chr10	8324654	8324654	+	5.68926e-10	8.74574e-06	-57.5144
chr10	8342104	8342104	+	1.51297e-05	0.00508331	54.5455
chr10	8361470	8361470	+	5.37562e-10	8.48988e-06	-72.4138
chr10	8633552	8633552	+	5.56265e-09	3.99532e-05	72.3214
chr10	8687801	8687801	+	8.25326e-06	0.00354313	-53.3333
chr10	8732619	8732619	-	2.31386e-05	0.00651091	51.4423
chr10	8851259	8851259	+	8.28888e-05	0.0136092	-50.8246
chr10	8891506	8891506	-	6.23626e-07	0.000745644	57.423
chr10	8952658	8952658	-	5.63118e-07	0.000700973	52.6786
chr10	8954320	8954320	+	2.95614e-07	0.0004733	55.2381
chr10	9008777	9008777	+	5.72179e-05	0.0109896	53.9365
chr10	9253059	9253059	+	2.64028e-11	1.04048e-06	-51.5844
chr10	9339029	9339029	+	1.35405e-09	1.5501e-05	-55.3235
chr10	9350848	9350848	-	2.26608e-09	2.19076e-05	59.6581
chr10	9663747	9663747	-	2.33783e-08	9.79551e-05	-59.3162
chr10	9682738	9682738	+	4.71848e-10	7.82775e-06	54.3396
chr10	10900959	10900959	-	2.18666e-07	0.000395444	-53.6866
chr10	11278630	11278630	+	1.9674e-06	0.00151261	53.8902
chr10	11453278	11453278	+	1.25512e-06	0.00114739	53.8462
chr10	12111600	12111600	-	1.12526e-08	6.13926e-05	-62.3977
chr10	12242635	12242635	-	1.13147e-08	6.15414e-05	53.452
chr10	13107988	13107988	-	2.41588e-05	0.0066788	55.1515
chr10	13298080	13298080	-	1.97756e-06	0.00151679	51.8519
chr10	13845146	13845146	+	2.04779e-06	0.00154764	-51.9816
chr10	13963108	13963108	+	1.63519e-05	0.00530941	-51.0508
chr10	14325823	14325823	-	3.70154e-08	0.000131589	54.8077
chr10	16805146	16805146	+	3.44478e-13	4.05746e-08	-85.7143
chr10	17613385	17613385	+	7.76138e-07	0.000850571	52.1739
chr10	17707699	17707699	-	4.69854e-06	0.00255438	-54.1275
chr10	18339669	18339669	+	4.27266e-07	0.000590757	-61.9048
chr10	19189248	19189248	-	0.000340442	0.030084	50.3704
chr10	19219663	19219663	+	2.74818e-07	0.000453013	52.1227
chr10	19383204	19383204	+	3.24527e-05	0.00792476	51.4333
chr10	19407808	19407808	+	0.000447197	0.0349819	52.1886
chr10	19523118	19523118	+	7.4255e-09	4.76915e-05	64.986
chr10	19700331	19700331	-	1.39653e-11	6.69876e-07	78.9474
chr10	19741134	19741134	+	5.62313e-05	0.0108704	55.9524
chr10	19820037	19820037	+	2.63197e-07	0.000440841	59.0909
chr10	20552980	20552980	+	6.7911e-09	4.50786e-05	60
chr10	20769846	20769846	-	0.000103721	0.0155042	-50.4762
chr10	21131779	21131779	+	1.40173e-06	0.00122562	59.0909
chr10	21163478	21163478	-	1.30362e-07	0.000285878	-63.4647
chr10	21609317	21609317	-	5.09476e-06	0.00267937	-54.6552
chr10	21632482	21632482	-	2.96668e-06	0.00193789	-54.1667
chr10	22377811	22377811	-	6.31684e-06	0.00303853	51.0599
chr10	22405956	22405956	-	1.91954e-07	0.000363963	57.4819
chr10	23234724	23234724	+	2.75843e-05	0.00722337	-53.3405
chr10	23392819	23392819	+	6.86218e-06	0.00318438	-54.1176
chr10	23405027	23405027	-	1.96854e-05	0.00592257	52.1429
chr10	23915106	23915106	-	1.62707e-06	0.00134446	53.8462
chr10	24327447	24327447	+	5.57806e-05	0.0108252	-55.1282
chr10	24629552	24629552	-	1.0859e-09	1.35591e-05	72.7273
chr10	25182201	25182201	+	3.58101e-07	0.000531224	71.4286
chr10	25227254	25227254	+	5.21357e-06	0.00271389	51.7241
chr10	25253919	25253919	+	3.10727e-09	2.68704e-05	-60
chr10	25312240	25312240	-	6.88332e-08	0.000192541	56.25
chr10	25511473	25511473	+	2.25248e-06	0.00164014	54.1667
chr10	26747090	26747090	-	5.21675e-07	0.000668779	-60.7143
chr10	27181093	27181093	+	4.35674e-06	0.00243979	-56.5217
chr10	27392483	27392483	-	2.12802e-09	2.11223e-05	-53.8462
chr10	27695816	27695816	+	2.00409e-08	8.85364e-05	58.3333
chr10	29840430	29840430	+	5.1e-06	0.00268014	52.8017
chr10	31212413	31212413	-	9.30277e-08	0.000233008	55.2632
chr10	32035132	32035132	+	3.03706e-06	0.00196204	56.4286
chr10	32652950	32652950	-	1.22049e-09	1.46093e-05	61.8129
chr10	32864815	32864815	-	2.984e-05	0.00755482	-56.266
chr10	33180177	33180177	-	1.8075e-06	0.00143622	53.2973
chr10	35790218	35790218	-	2.133e-06	0.00158499	53.9171
chr10	36729516	36729516	+	8.65931e-10	1.16936e-05	50.5486
chr10	37207900	37207900	-	7.73162e-09	4.87571e-05	68.1818
chr10	37614832	37614832	+	1.57087e-07	0.000322532	-51.6129
chr10	37665171	37665171	+	0.000447197	0.0349819	52.1886
chr10	38150922	38150922	-	5.66736e-10	8.74043e-06	58.3251
chr10	38703131	38703131	-	4.95128e-07	0.000647111	56.5341
chr10	38885349	38885349	-	6.6367e-11	2.0098e-06	-63.7519
chr10	39015099	39015099	+	1.68846e-08	7.97046e-05	55.1282
chr10	39043358	39043358	-	1.56102e-05	0.00517045	-52.381
chr10	39260985	39260985	+	3.015e-08	0.000115927	57.9167
chr10	41088749	41088749	+	1.40573e-08	7.13686e-05	57.4359
chr10	41147002	41147002	-	1.28838e-09	1.4992e-05	52
chr10	41432997	41432997	-	1.32624e-05	0.00469543	54.8387
chr10	41603536	41603536	-	5.38403e-07	0.000681895	52.981
chr10	41828454	41828454	+	2.16597e-08	9.28835e-05	-61.5385
chr10	41838293	41838293	+	6.22724e-08	0.00018025	57.1429
chr10	41881952	41881952	+	3.51336e-07	0.000524935	51.6129
chr10	41906900	41906900	+	1.26137e-06	0.00114966	52.3502
chr10	41938993	41938993	+	4.9777e-08	0.000156579	-60
chr10	41962858	41962858	-	2.36721e-10	4.85379e-06	51.1823
chr10	41977005	41977005	-	5.13913e-07	0.000662594	55.7635
chr10	41998834	41998834	+	3.81938e-06	0.00225737	51.0684
chr10	42023961	42023961	-	1.08872e-05	0.00417452	50.0797
chr10	42145152	42145152	-	3.46839e-05	0.00823725	-52.3529
chr10	42260501	42260501	+	2.0609e-08	8.98685e-05	57.1429
chr10	42267082	42267082	-	6.59525e-08	0.000186837	-51.1628
chr10	42326737	42326737	+	2.05405e-06	0.0015497	52.6807
chr10	42346471	42346471	-	3.17129e-05	0.00782924	56.4935
chr10	42618245	42618245	+	8.11517e-06	0.00351837	-51.7293
chr10	42629834	42629834	-	4.70035e-08	0.00015058	-80.9524
chr10	43064742	43064742	+	4.18439e-05	0.00916952	52.4476
chr10	43440419	43440419	-	1.59483e-05	0.00523594	-61.9048
chr10	44016223	44016223	-	1.00005e-08	5.72571e-05	-64.2857
chr10	44040520	44040520	+	8.28855e-07	0.000886178	-60
chr10	44168594	44168594	+	1.40368e-06	0.00122682	-58.1547
chr10	44332337	44332337	-	3.74796e-06	0.00222934	-61.1888
chr10	44398866	44398866	+	2.27668e-08	9.62327e-05	-52.4363
chr10	44893255	44893255	-	3.73995e-06	0.00222644	53.125
chr10	44999274	44999274	-	1.03161e-06	0.00101842	57.0588
chr10	45790229	45790229	+	4.8916e-09	3.65945e-05	56.6278
chr10	45865700	45865700	-	1.22135e-06	0.00112701	-55.5556
chr10	46011385	46011385	-	2.37233e-06	0.00169527	54.662
chr10	49234580	49234580	-	1.70001e-07	0.000337544	-53.3333
chr10	52076813	52076813	+	1.98647e-07	0.000371332	-56.2935
chr10	52356260	52356260	+	6.06759e-07	0.000733168	54.2857
chr10	53108321	53108321	+	2.42792e-08	0.000100459	-63.2184
chr10	53633803	53633803	+	1.13352e-09	1.38774e-05	60.119
chr10	53715678	53715678	+	1.08636e-08	6.01366e-05	-51.123
chr10	53877984	53877984	+	6.32545e-10	9.35562e-06	-57.4468
chr10	55893644	55893644	-	8.16045e-06	0.00352575	57.2043
chr10	56030041	56030041	+	2.17176e-05	0.00628148	51.7241
chr10	56310282	56310282	-	4.01738e-06	0.00232526	-55.5556
chr10	56989189	56989189	+	6.84668e-11	2.04074e-06	54.7619
chr10	57840269	57840269	+	3.91555e-07	0.000560763	-53.3333
chr10	58623797	58623797	-	6.18058e-06	0.00299541	52
chr10	58647943	58647943	-	1.35145e-07	0.000292137	-53.1915
chr10	58803251	58803251	-	1.93267e-06	0.00149705	-60.7143
chr10	59156224	59156224	-	1.52368e-06	0.00128856	54.386
chr10	59161133	59161133	+	3.24188e-06	0.00204181	-56.092
chr10	59542583	59542583	+	7.87895e-06	0.00345806	57.5758
chr10	60022789	60022789	+	3.66619e-06	0.00219861	51.4035
chr10	60048614	60048614	+	1.67462e-05	0.00538134	-55
chr10	60368728	60368728	-	2.56716e-07	0.000436398	-55.3872
chr10	60382582	60382582	+	6.50174e-07	0.000764562	60.6255
chr10	60522897	60522897	-	1.04801e-09	1.3289e-05	67.7778
chr10	60528013	60528013	+	4.28762e-07	0.000592283	52.6455
chr10	60617704	60617704	+	7.30331e-06	0.00330701	-54.2484
chr10	60684882	60684882	+	3.89556e-06	0.00228153	58.4586
chr10	60721039	60721039	-	2.64033e-05	0.00703268	52.8205
chr10	60762088	60762088	+	7.21136e-06	0.00328516	50.6944
chr10	60817901	60817901	+	6.27734e-09	4.28489e-05	-65.625
chr10	60881697	60881697	+	5.04895e-06	0.00266448	50.1961
chr10	60931380	60931380	+	1.24944e-06	0.00114517	59.3333
chr10	60944558	60944558	+	1.01574e-06	0.00100839	55.5787
chr10	61070497	61070497	+	2.45156e-07	0.000423963	68.75
chr10	61075082	61075082	+	1.93565e-11	8.34253e-07	63.6364
chr10	61224109	61224109	-	2.7e-09	2.44632e-05	57.058
chr10	61368521	61368521	+	1.18226e-07	0.000270103	-56.6667
chr10	61477679	61477679	+	6.1856e-07	0.000741349	55.1724
chr10	61577486	61577486	-	3.58349e-06	0.00217031	52
chr10	61735441	61735441	-	1.35277e-09	1.5501e-05	70.2552
chr10	61812377	61812377	-	4.2854e-07	0.000592102	53.8377
chr10	62003436	62003436	-	4.28413e-09	3.31496e-05	60.8796
chr10	62115663	62115663	-	9.4103e-06	0.00383605	53.2454
chr10	62344143	62344143	+	9.56205e-06	0.0038745	-63.4461
chr10	62727309	62727309	-	0.000102718	0.0154082	-50.625
chr10	62843842	62843842	-	8.58529e-08	0.000221061	68.3983
chr10	63202889	63202889	+	2.35664e-09	2.2547e-05	-78.3069
chr10	63396918	63396918	+	1.07347e-05	0.00414027	54.8387
chr10	63615667	63615667	-	8.87192e-09	5.29256e-05	-59.2593
chr10	64400589	64400589	+	1.19898e-06	0.00111267	-51.7172
chr10	64645086	64645086	-	1.4374e-05	0.00492149	57.6923
chr10	67071002	67071002	-	0.000145724	0.0187792	-54.7059
chr10	67433429	67433429	-	2.42798e-07	0.000421298	-54.2857
chr10	67553405	67553405	+	2.43241e-05	0.00670305	53.125
chr10	67582764	67582764	-	1.7433e-05	0.00552316	52.8736
chr10	68002082	68002082	-	2.12693e-06	0.00158269	-60.5263
chr10	68042616	68042616	-	0.000101548	0.0153058	50.0597
chr10	68098745	68098745	+	1.0919e-05	0.00417929	53.8462
chr10	68198493	68198493	-	7.18659e-13	7.18707e-08	-82.6087
chr10	68280793	68280793	+	8.16636e-12	4.46379e-07	-53.9811
chr10	68299516	68299516	-	1.11484e-08	6.10122e-05	51.6129
chr10	69027195	69027195	+	2.83411e-05	0.00733094	60.4555
chr10	69224543	69224543	+	6.52695e-08	0.000185884	-50.0901
chr10	69349795	69349795	-	3.01662e-06	0.00195453	51.6129
chr10	70184458	70184458	-	9.34639e-06	0.0038201	54.3103
chr10	70575698	70575698	-	1.36409e-07	0.000294268	68.4547
chr10	70729497	70729497	+	4.11449e-07	0.000577702	71.1538
chr10	71475258	71475258	+	9.38504e-07	0.000958737	53.5714
chr10	72027774	72027774	-	2.26903e-07	0.000402769	-68.1818
chr10	72073562	72073562	+	5.4605e-06	0.00279113	57.0136
chr10	72645425	72645425	+	1.08012e-05	0.00415472	57.8544
chr10	73411613	73411613	-	1.68726e-07	0.000335764	-57.1429
chr10	73485020	73485020	+	3.13043e-07	0.000490536	-59.2593
chr10	73706416	73706416	+	2.14445e-10	4.57398e-06	62.6426
chr10	74021002	74021002	-	9.59693e-07	0.000972669	51.2597
chr10	74063471	74063471	+	0.000340442	0.030084	-50.5952
chr10	74132022	74132022	-	8.60287e-06	0.00363729	-57.5
chr10	75119973	75119973	-	1.95403e-07	0.000368316	71.9495
chr10	75119995	75119995	-	0.000173902	0.0207198	50.6793
chr10	75146483	75146483	-	3.96901e-07	0.000564906	-53.3333
chr10	75324329	75324329	+	8.60028e-06	0.00363729	62.013
chr10	75334198	75334198	-	1.63441e-08	7.83625e-05	54.1667
chr10	75648928	75648928	+	6.94966e-05	0.0123068	52.1739
chr10	75664869	75664869	+	1.27723e-09	1.49164e-05	-52.2727
chr10	75664918	75664918	+	9.63158e-10	1.2406e-05	53.4722
chr10	76355969	76355969	-	2.70587e-07	0.000448822	-54.1126
chr10	77020679	77020679	-	4.07327e-06	0.00234443	-54.5455
chr10	77155327	77155327	+	2.02482e-06	0.00153636	-52.193
chr10	77255383	77255383	+	3.70161e-08	0.000131589	-57.3853
chr10	77480693	77480693	+	1.51898e-07	0.000316258	-56.2234
chr10	77559366	77559366	-	2.243e-07	0.000400549	51.7241
chr10	78134227	78134227	+	8.82777e-05	0.0141305	57.0652
chr10	78160546	78160546	+	1.4723e-07	0.000309788	-50.6684
chr10	80937344	80937344	+	1.19026e-09	1.43708e-05	60
chr10	82913109	82913109	+	1.29741e-05	0.0046354	52.6864
chr10	82929364	82929364	-	1.39261e-10	3.33242e-06	51.6102
chr10	83010890	83010890	+	8.50616e-05	0.0138359	-53.3333
chr10	83167177	83167177	+	7.43465e-10	1.04804e-05	54.2857
chr10	83756001	83756001	-	6.84032e-06	0.00317827	58.7963
chr10	84084812	84084812	-	5.72657e-08	0.00017134	58.0645
chr10	84289162	84289162	-	1.98013e-07	0.000370943	-52.381
chr10	84384579	84384579	+	4.1038e-06	0.00235547	-56.4444
chr10	84443181	84443181	+	3.28667e-05	0.00799088	-52.3627
chr10	84444265	84444265	-	1.51644e-06	0.00128469	53.125
chr10	84541640	84541640	+	1.03239e-06	0.00101852	56.5217
chr10	84541667	84541667	+	1.37796e-09	1.57034e-05	64.1667
chr10	84709258	84709258	-	4.84064e-07	0.000638249	-51.038
chr10	84757810	84757810	-	7.80443e-05	0.0131661	52.1739
chr10	84770169	84770169	-	3.03342e-06	0.00196033	53.4194
chr10	84771247	84771247	-	7.99998e-06	0.00348678	53.6752
chr10	84783594	84783594	-	4.09641e-07	0.000576462	54.0541
chr10	84944901	84944901	+	7.91025e-07	0.000861502	-54.1667
chr10	84952048	84952048	+	6.44935e-12	3.77722e-07	51.7154
chr10	84953839	84953839	+	3.40971e-08	0.000125592	59.1346
chr10	84955905	84955905	+	3.75683e-09	3.01477e-05	60.4345
chr10	84967311	84967311	-	1.98176e-05	0.00594456	59.5109
chr10	85034109	85034109	-	2.17356e-05	0.00628536	-55.7734
chr10	85282310	85282310	-	3.43088e-09	2.82594e-05	74.714
chr10	85375928	85375928	+	2.22183e-08	9.45902e-05	71.6667
chr10	85729512	85729512	+	1.05137e-06	0.00102826	-52.2078
chr10	86189906	86189906	-	2.2254e-10	4.69476e-06	55.5556
chr10	86339646	86339646	+	4.63819e-08	0.000149903	-50.1852
chr10	86588286	86588286	+	1.27564e-06	0.00115568	66.6667
chr10	86746736	86746736	-	4.76094e-07	0.000631973	-52.4176
chr10	86972912	86972912	+	7.77716e-12	4.29393e-07	-68.4211
chr10	87054038	87054038	-	0.000307053	0.0284126	-50.9972
chr10	87502762	87502762	-	2.76337e-05	0.00722927	-53.854
chr10	87615380	87615380	+	1.65274e-05	0.00534315	50.774
chr10	87665684	87665684	-	1.13843e-06	0.00108215	-56.0484
chr10	87667229	87667229	+	2.8921e-06	0.00190756	-55.0403
chr10	88724665	88724665	-	0.000125094	0.0172212	50.4717
chr10	89180191	89180191	-	2.50649e-05	0.00681215	-53.2609
chr10	89543950	89543950	+	3.93211e-08	0.000136749	-51.5152
chr10	90367341	90367341	-	2.70225e-05	0.00713539	59.2593
chr10	91081240	91081240	+	1.23612e-05	0.00450444	-51.8519
chr10	91691637	91691637	-	6.34298e-09	4.31857e-05	-54.5455
chr10	91706040	91706040	-	0.00024817	0.0252523	-51.4785
chr10	91833565	91833565	+	4.8084e-10	7.93963e-06	-66.6876
chr10	91997115	91997115	-	8.38433e-06	0.00357444	52.0778
chr10	92061727	92061727	+	1.77705e-09	1.85494e-05	-53.0112
chr10	92292161	92292161	-	7.2701e-08	0.000199568	60
chr10	92303051	92303051	-	5.87863e-11	1.85469e-06	63.1976
chr10	92631372	92631372	-	2.79492e-15	7.22639e-10	87.4719
chr10	92631381	92631381	-	2.02201e-10	4.38338e-06	71.4286
chr10	92698124	92698124	-	8.07007e-06	0.00350709	-51.5556
chr10	92763897	92763897	+	2.79759e-06	0.00186788	52.498
chr10	92794452	92794452	+	2.51832e-07	0.000430928	50.8568
chr10	92892111	92892111	-	4.24303e-07	0.000588347	51.9737
chr10	92897982	92897982	+	9.99084e-06	0.00397337	-55.5556
chr10	93212675	93212675	-	4.5325e-06	0.0024978	52.1181
chr10	93572204	93572204	+	2.78078e-12	2.1361e-07	68.3193
chr10	93735408	93735408	+	2.23422e-07	0.000400074	63.1532
chr10	93905274	93905274	-	5.1749e-08	0.000160826	67.033
chr10	94118754	94118754	-	3.67068e-11	1.31459e-06	67.013
chr10	94500565	94500565	+	5.65918e-07	0.000702931	-69.2308
chr10	94569267	94569267	-	1.53158e-07	0.000317417	52.2113
chr10	94827838	94827838	+	6.72929e-08	0.000189772	51.6717
chr10	95152829	95152829	-	4.96193e-06	0.00263725	60.1648
chr10	95206291	95206291	-	4.86204e-07	0.000640024	-51.7241
chr10	95257239	95257239	+	1.10592e-05	0.0042101	61.0811
chr10	95278627	95278627	-	2.09798e-07	0.000384843	57.2423
chr10	95410649	95410649	+	1.6651e-06	0.00136398	-58.8235
chr10	95897134	95897134	+	1.32647e-06	0.00118662	-51.0073
chr10	96214961	96214961	-	5.36004e-06	0.00275788	-50.3993
chr10	96748956	96748956	+	1.34585e-08	6.91844e-05	55.1213
chr10	97400691	97400691	+	4.09366e-08	0.000139517	-67.0168
chr10	98352971	98352971	+	1.04721e-07	0.000250364	55.1724
chr10	98723751	98723751	+	1.73062e-07	0.00034092	59.8118
chr10	98726159	98726159	-	1.07258e-06	0.00104134	-58.4463
chr10	98745081	98745081	-	1.98675e-08	8.81365e-05	58.7838
chr10	99390347	99390347	-	1.90294e-09	1.95471e-05	-51.5152
chr10	99979111	99979111	-	2.77506e-08	0.000109692	51.6129
chr10	101602845	101602845	+	1.51613e-06	0.00128461	-52.1739
chr10	102822513	102822513	-	1.76482e-06	0.00141494	-68.0251
chr10	105497289	105497289	+	9.00163e-07	0.000934584	61.257
chr10	105514211	105514211	+	1.15675e-06	0.00108926	52.2327
chr10	105540999	105540999	+	6.04853e-05	0.0113545	52.7143
chr10	105805385	105805385	-	1.23612e-06	0.00113667	57.6923
chr10	106023050	106023050	+	5.09942e-05	0.0102806	54.5882
chr10	107347828	107347828	+	2.58764e-05	0.00694487	54.1667
chr10	110097148	110097148	-	1.70819e-06	0.00138547	56.5
chr10	110102755	110102755	+	7.27994e-06	0.00330211	60
chr10	110711511	110711511	+	7.51782e-09	4.78269e-05	-58.1395
chr10	110785586	110785586	+	2.15544e-06	0.00159662	-51.2593
chr10	110882252	110882252	+	3.1295e-09	2.6954e-05	55.2632
chr10	111656622	111656622	+	4.77978e-06	0.00258331	-57.3529
chr10	111776565	111776565	-	1.60043e-07	0.000325825	-55
chr10	112204564	112204564	-	3.05224e-06	0.00196534	53.4409
chr10	113272726	113272726	-	5.76625e-09	4.08872e-05	60
chr10	113619608	113619608	+	1.64056e-06	0.00135045	68.7831
chr10	113807955	113807955	-	2.96169e-06	0.00193659	60.1881
chr10	115014564	115014564	+	3.73235e-09	3.00422e-05	69.4872
chr10	115625036	115625036	+	9.45769e-05	0.0146858	51.0526
chr10	115854807	115854807	-	1.54478e-05	0.00513965	-51.0417
chr10	116369451	116369451	-	2.26727e-05	0.00643293	-56.7297
chr10	117434130	117434130	-	4.03965e-08	0.000138834	-66.3532
chr10	117618088	117618088	+	6.7189e-06	0.00314932	59.6561
chr10	118600505	118600505	-	1.55578e-05	0.00516079	55.2795
chr10	118788042	118788042	-	6.7189e-06	0.00314932	60.3175
chr10	119007326	119007326	-	1.33932e-08	6.89548e-05	61.0728
chr10	119007858	119007858	-	4.30136e-11	1.46146e-06	50.0469
chr10	119010701	119010701	-	9.86864e-08	0.000241996	-53.8462
chr10	119151502	119151502	-	1.43692e-08	7.23973e-05	-66.6667
chr10	119686032	119686032	-	5.55599e-06	0.00281712	-57.5
chr10	119805362	119805362	+	4.04425e-08	0.000138834	-57.9745
chr10	119955714	119955714	-	5.55774e-13	5.8916e-08	66.6667
chr10	120108651	120108651	-	8.08958e-05	0.0134211	50.6912
chr10	120283951	120283951	-	5.20828e-10	8.34011e-06	65.1439
chr10	120788248	120788248	-	1.61407e-08	7.78114e-05	69.1176
chr10	120788967	120788967	+	1.09529e-07	0.000257161	57.6923
chr10	120866030	120866030	-	1.76309e-06	0.00141431	60.582
chr10	121075080	121075080	-	4.00815e-06	0.00232194	60.4497
chr10	121088215	121088215	+	5.72089e-09	4.06744e-05	53.4884
chr10	121510620	121510620	-	1.03112e-08	5.81431e-05	-58.8636
chr10	121518153	121518153	+	6.24677e-08	0.000180486	-53.8462
chr10	121762359	121762359	-	3.16746e-06	0.00200869	-62.069
chr10	121827561	121827561	-	3.63774e-06	0.00218873	54.1667
chr10	121925657	121925657	+	1.59192e-07	0.000325028	61.068
chr10	121938229	121938229	-	0.000218953	0.0235791	-50.5247
chr10	123206833	123206833	+	1.40478e-05	0.00485087	50.6912
chr10	123750945	123750945	+	1.34317e-07	0.00029094	57.8947
chr10	124921279	124921279	-	1.13156e-06	0.00107795	-58.0645
chr10	124921666	124921666	-	1.9374e-06	0.00149966	-50.8159
chr10	125268536	125268536	+	7.06771e-05	0.0124297	53.125
chr10	125346207	125346207	-	2.24842e-05	0.00640826	54.5455
chr10	125838138	125838138	-	1.25191e-07	0.000280028	69.2941
chr10	126159905	126159905	-	5.73199e-06	0.00287364	57.1429
chr10	126332292	126332292	+	3.62242e-06	0.00218307	55.7143
chr10	126457432	126457432	+	5.1958e-06	0.00271127	52.0474
chr10	126934825	126934825	-	7.9112e-06	0.0034649	54.7619
chr10	127329245	127329245	-	1.73317e-05	0.00549889	58.5714
chr10	127361069	127361069	-	3.0666e-08	0.000117104	-55.5556
chr10	127527912	127527912	-	2.57974e-06	0.00177729	-59.3939
chr10	127697221	127697221	-	8.64681e-06	0.00364767	53.5714
chr10	128003650	128003650	+	8.29855e-07	0.000886396	-62.5
chr10	128003722	128003722	+	2.90449e-06	0.00191347	-60
chr10	128900426	128900426	+	3.53284e-08	0.000128037	-53.3333
chr11	3518805	3518805	-	3.9799e-09	3.1438e-05	-55.5556
chr11	3523818	3523818	+	2.11991e-08	9.165e-05	60.7143
chr11	3932912	3932912	+	1.7612e-07	0.000344783	51.57
chr11	4055946	4055946	+	8.72422e-06	0.00366908	-58.2512
chr11	5039309	5039309	-	2.99687e-10	5.64281e-06	59.375
chr11	5060204	5060204	+	1.01178e-08	5.77265e-05	-53.5745
chr11	5164063	5164063	-	7.30943e-10	1.03868e-05	-52.381
chr11	5171098	5171098	-	2.62886e-11	1.03984e-06	52.6316
chr11	5219825	5219825	+	4.13866e-06	0.00236498	56.25
chr11	5422654	5422654	-	1.66376e-06	0.00136309	-53.8462
chr11	6215822	6215822	+	1.87493e-05	0.00575322	52.7778
chr11	6504085	6504085	+	3.59355e-10	6.48475e-06	70.1201
chr11	6571793	6571793	+	0.000356694	0.0309301	50.4762
chr11	6589556	6589556	+	1.1075e-07	0.000258596	-55.8824
chr11	7058255	7058255	-	3.58828e-06	0.00217146	50.7839
chr11	7166257	7166257	+	5.84319e-09	4.11575e-05	-53.2051
chr11	7457874	7457874	+	5.43168e-09	3.94161e-05	-50.2963
chr11	7594430	7594430	+	7.09831e-07	0.000805472	-50.2778
chr11	7604274	7604274	-	1.36863e-05	0.00477683	52.1429
chr11	8436589	8436589	-	0.000159144	0.019738	54.2208
chr11	8496745	8496745	+	7.5291e-09	4.785e-05	53.4884
chr11	8571251	8571251	+	6.16731e-07	0.000740072	-54.1667
chr11	8657535	8657535	+	4.98566e-08	0.000156693	51.0033
chr11	8688672	8688672	-	1.85858e-08	8.50337e-05	-55
chr11	8706042	8706042	+	9.0225e-06	0.00374047	-53.4454
chr11	8776841	8776841	-	4.63912e-10	7.76904e-06	76.8908
chr11	9418299	9418299	+	5.36501e-07	0.000680298	51.8519
chr11	9661416	9661416	+	1.42422e-06	0.00123728	57.1429
chr11	9761390	9761390	+	4.1749e-08	0.000141351	58.1155
chr11	10956110	10956110	-	4.23581e-05	0.0092377	-54.2413
chr11	11815796	11815796	+	9.04728e-07	0.000937647	-61.2727
chr11	12227785	12227785	+	1.92461e-07	0.000364522	55.6579
chr11	12228326	12228326	+	6.52346e-07	0.000765818	-65.2174
chr11	12370869	12370869	-	6.57416e-06	0.00310874	-58.0819
chr11	12521836	12521836	+	2.77771e-05	0.00724894	-52.6667
chr11	12524962	12524962	+	0.00023714	0.024613	-52.2989
chr11	15469389	15469389	+	9.09613e-05	0.0143559	54.8485
chr11	15667606	15667606	-	6.94966e-05	0.0123068	52.1739
chr11	16771878	16771878	+	3.02866e-07	0.000480924	-53.125
chr11	16911840	16911840	-	1.15807e-06	0.00108976	-54.5455
chr11	16911850	16911850	-	8.52309e-05	0.0138484	-51.8717
chr11	17381602	17381602	+	1.15388e-07	0.000265855	72.7273
chr11	18161399	18161399	+	1.34021e-07	0.000290714	58.6207
chr11	18748364	18748364	-	5.57806e-05	0.0108252	54.2735
chr11	19063543	19063543	-	1.24606e-07	0.000279087	-56.3879
chr11	19249599	19249599	-	2.199e-06	0.00161714	51.6129
chr11	19256587	19256587	-	4.79637e-11	1.58157e-06	-55.4698
chr11	19489264	19489264	+	1.87e-05	0.00574358	57.0234
chr11	20832562	20832562	+	5.69221e-07	0.000704924	-64.5022
chr11	20855955	20855955	+	5.30793e-07	0.000676407	53.5714
chr11	20890378	20890378	-	1.24606e-07	0.000279087	57.1429
chr11	21050475	21050475	+	2.72013e-08	0.000108646	-69.1667
chr11	21495063	21495063	-	5.40131e-10	8.48988e-06	65.3571
chr11	21709382	21709382	+	2.27296e-06	0.00164966	-57.0806
chr11	21865284	21865284	+	2.32833e-06	0.00167585	50.4821
chr11	21943059	21943059	+	1.90159e-05	0.00580577	-57.81
chr11	21976545	21976545	+	5.23122e-06	0.00271932	52.9412
chr11	22005173	22005173	-	0.000356694	0.0309301	50.4762
chr11	22010116	22010116	+	3.51336e-07	0.000524935	-51.6129
chr11	22333264	22333264	+	1.08043e-05	0.00415486	55.746
chr11	23139543	23139543	-	2.09384e-05	0.00615688	-56.8571
chr11	24020613	24020613	+	6.12102e-09	4.23269e-05	56.7568
chr11	24614048	24614048	-	1.5513e-07	0.000320188	52.622
chr11	24743698	24743698	+	5.28415e-07	0.000674402	50.8306
chr11	25530516	25530516	-	2.13621e-06	0.00158681	-51.5931
chr11	26092494	26092494	-	1.06956e-06	0.00103986	-55.5556
chr11	26309910	26309910	-	8.69482e-06	0.00365992	-54.3938
chr11	26347310	26347310	-	3.46092e-07	0.00051959	52.9412
chr11	28585128	28585128	+	2.25054e-07	0.000400903	56.0224
chr11	29790737	29790737	-	1.2238e-09	1.46093e-05	73.913
chr11	31356275	31356275	-	5.2692e-09	3.84958e-05	65.2174
chr11	32313734	32313734	-	0.000205238	0.0227483	-52.7273
chr11	32344949	32344949	-	1.91305e-05	0.005827	56.5476
chr11	32387615	32387615	-	2.10263e-05	0.00617057	-52.9101
chr11	32389672	32389672	+	1.12813e-08	6.14527e-05	68.7791
chr11	32587647	32587647	-	1.01865e-08	5.79938e-05	-55.5692
chr11	32949111	32949111	+	3.43841e-06	0.00211656	60
chr11	32960377	32960377	-	5.37739e-07	0.000681364	55.4252
chr11	33109112	33109112	-	2.54126e-05	0.00687364	52.9503
chr11	33223714	33223714	+	6.68817e-06	0.00314075	-51.1364
chr11	33426361	33426361	-	2.6675e-08	0.000107152	51.5556
chr11	33558083	33558083	+	1.95324e-08	8.7219e-05	-51.0015
chr11	33762610	33762610	-	1.22652e-09	1.46093e-05	64.1026
chr11	33766658	33766658	-	8.45601e-10	1.14923e-05	74.7619
chr11	33788115	33788115	-	7.51267e-06	0.00336174	59.7436
chr11	33845475	33845475	+	1.89971e-05	0.00580221	-51.5257
chr11	33852899	33852899	-	6.30991e-06	0.00303702	-64
chr11	33904258	33904258	-	1.44871e-05	0.00494425	-57.545
chr11	34008548	34008548	-	9.63815e-06	0.00388955	53.871
chr11	34170486	34170486	+	2.04501e-05	0.0060648	-51.7241
chr11	34295027	34295027	-	8.19389e-07	0.000879701	66.6667
chr11	34317272	34317272	+	1.13776e-09	1.38953e-05	51.4815
chr11	34363863	34363863	+	2.72692e-08	0.000108727	52.8409
chr11	34432199	34432199	+	0.000115468	0.0164968	51.1538
chr11	35038884	35038884	-	1.77946e-14	3.77272e-09	-55.5977
chr11	35050290	35050290	-	2.38571e-05	0.00663995	-50.8075
chr11	35113181	35113181	+	9.62748e-09	5.58917e-05	-52.5
chr11	35296647	35296647	+	3.64654e-05	0.00847979	-50.2747
chr11	35344979	35344979	+	2.21419e-07	0.000398081	-50.8387
chr11	35482970	35482970	-	4.63393e-06	0.00253582	-50.8741
chr11	35555353	35555353	-	1.22124e-08	6.47623e-05	73.3037
chr11	35749198	35749198	-	1.07371e-06	0.00104184	58.1472
chr11	36870775	36870775	-	9.97215e-06	0.00396936	58.0645
chr11	37239254	37239254	+	2.76231e-06	0.00185391	56.9106
chr11	37436510	37436510	-	4.5361e-07	0.000613233	-55.1724
chr11	37927857	37927857	-	3.11196e-07	0.000488581	-65.2174
chr11	38195953	38195953	-	2.97003e-07	0.00047495	-51.7094
chr11	38678070	38678070	+	1.93049e-07	0.000365114	55.3333
chr11	39523395	39523395	-	4.47202e-08	0.000146952	60.6061
chr11	39583806	39583806	+	6.20617e-06	0.00300317	59.6154
chr11	40722563	40722563	-	1.08553e-07	0.000256119	57.8947
chr11	43049219	43049219	+	1.90667e-05	0.00581521	-56
chr11	43849962	43849962	+	1.26725e-05	0.00457227	-64.0316
chr11	44156916	44156916	-	5.28434e-06	0.00273582	-57.3971
chr11	44208299	44208299	+	6.52346e-07	0.000765818	65.2174
chr11	44658151	44658151	+	4.31631e-07	0.000594213	52.3707
chr11	44702314	44702314	-	7.17035e-06	0.00327168	-50.7154
chr11	44890640	44890640	-	1.0581e-07	0.00025189	56.8443
chr11	44976416	44976416	-	2.13393e-07	0.000389365	-54.7619
chr11	44980376	44980376	+	7.61907e-06	0.00339192	55.2585
chr11	45151046	45151046	-	5.84139e-06	0.00290803	52.9412
chr11	45451382	45451382	-	1.88085e-08	8.56301e-05	59.8649
chr11	45451748	45451748	+	1.86086e-09	1.92266e-05	-64.362
chr11	45847282	45847282	-	1.05594e-06	0.00103161	50.7653
chr11	46552136	46552136	-	3.39491e-07	0.000513093	-54.7619
chr11	47256415	47256415	+	9.4111e-12	4.9634e-07	-81.6498
chr11	47675177	47675177	+	1.28486e-06	0.00115978	-52
chr11	47698949	47698949	-	6.97984e-08	0.000194389	53.0065
chr11	48048473	48048473	+	3.06179e-05	0.00767599	-51.5344
chr11	48217927	48217927	+	4.51136e-08	0.000147559	56.4103
chr11	48493453	48493453	-	2.70891e-07	0.000449079	-58.26
chr11	48516081	48516081	+	1.51511e-07	0.000316041	64.2857
chr11	49991375	49991375	+	4.58213e-06	0.00251842	56.9432
chr11	50242171	50242171	+	3.58749e-05	0.00839634	54.798
chr11	50508249	50508249	-	9.27881e-06	0.00380177	-53.9108
chr11	50622155	50622155	-	2.93134e-07	0.000470542	50.814
chr11	50746874	50746874	-	0.000107011	0.0157704	50.1792
chr11	50764100	50764100	-	9.82182e-06	0.00393285	-50.1099
chr11	51376643	51376643	-	1.90445e-06	0.00148336	-56.0372
chr11	51901250	51901250	-	7.55645e-06	0.00337507	52.9412
chr11	52273568	52273568	+	4.80246e-07	0.000635177	62.5
chr11	52293655	52293655	+	3.40241e-05	0.00815242	56
chr11	52572048	52572048	+	9.5427e-07	0.000968496	-50.8484
chr11	52622844	52622844	-	0.00051657	0.0377995	-52
chr11	52751211	52751211	-	2.42969e-05	0.00669922	-50.4615
chr11	52900114	52900114	-	6.04976e-07	0.000731824	52.381
chr11	52914056	52914056	-	1.27432e-07	0.000282964	64.1892
chr11	53093552	53093552	-	4.12443e-07	0.000578714	66.6667
chr11	53101175	53101175	-	2.30964e-05	0.00650458	-51.0121
chr11	53115371	53115371	-	2.59106e-07	0.000437908	-51.8519
chr11	53149714	53149714	-	1.40605e-07	0.000300197	-54.9442
chr11	53757640	53757640	+	7.84705e-07	0.000856944	53.3651
chr11	53961398	53961398	-	3.27455e-10	6.03697e-06	67.1892
chr11	54108396	54108396	-	3.35106e-07	0.000509086	52.381
chr11	54245273	54245273	+	4.63671e-07	0.000621206	-62.8049
chr11	54893146	54893146	+	2.89002e-07	0.000467453	51.7241
chr11	55270830	55270830	-	3.54638e-07	0.000528453	71.1002
chr11	55333850	55333850	+	2.31644e-07	0.000408244	51.1905
chr11	55373441	55373441	-	6.31404e-05	0.0116544	-58.9091
chr11	55385527	55385527	+	1.17384e-05	0.00436494	54.8718
chr11	55417503	55417503	-	1.0919e-05	0.00417929	53.8462
chr11	55424826	55424826	+	2.99352e-07	0.000477541	54.5455
chr11	55523587	55523587	-	5.69221e-07	0.000704924	58.4314
chr11	55543388	55543388	-	1.28339e-05	0.00460641	51.2673
chr11	55972900	55972900	-	1.56926e-07	0.000322514	54.5217
chr11	55977640	55977640	-	2.96499e-11	1.13061e-06	-54.5551
chr11	57661993	57661993	-	3.86641e-10	6.85397e-06	-57.1429
chr11	57947867	57947867	+	8.06867e-07	0.000870483	55.8689
chr11	58369260	58369260	+	3.91843e-08	0.000136693	-55.5556
chr11	58369262	58369262	+	4.13688e-06	0.00236494	-58.3559
chr11	58635621	58635621	+	2.42073e-06	0.00171296	-53.4091
chr11	58720963	58720963	-	2.51978e-06	0.00175399	56
chr11	59595005	59595005	-	2.69927e-06	0.00182803	52.2727
chr11	59638802	59638802	+	7.25517e-09	4.69823e-05	-57.714
chr11	60066363	60066363	-	5.68506e-07	0.0007047	52.0588
chr11	60068335	60068335	-	4.8087e-08	0.00015308	-50.4577
chr11	60091835	60091835	-	2.21383e-07	0.000398081	-60
chr11	60363958	60363958	+	2.43039e-06	0.00171647	51.094
chr11	60692914	60692914	-	4.68963e-06	0.0025515	-55.6936
chr11	60958756	60958756	+	8.11177e-07	0.000873178	-56.0054
chr11	61041849	61041849	-	4.59801e-11	1.54248e-06	-64.7059
chr11	61072085	61072085	-	1.25845e-06	0.0011484	53.5714
chr11	61639449	61639449	+	5.9532e-11	1.87265e-06	-63.3585
chr11	61683147	61683147	+	8.04879e-07	0.000869754	54.2271
chr11	61717619	61717619	+	0.000228228	0.0240839	-50.5698
chr11	62128743	62128743	-	6.59525e-08	0.000186837	-51.1628
chr11	63130193	63130193	-	1.24045e-07	0.000278771	59.4595
chr11	63137725	63137725	-	9.09304e-10	1.20904e-05	-51.3709
chr11	63137727	63137727	-	1.38597e-10	3.32931e-06	-54.6176
chr11	63577417	63577417	+	5.11992e-06	0.00268607	56.4394
chr11	63752540	63752540	+	4.55476e-08	0.000148158	56
chr11	63888002	63888002	-	3.59226e-08	0.000129043	55.2854
chr11	63892055	63892055	-	4.06453e-06	0.00234042	55.2608
chr11	63897917	63897917	+	2.05868e-07	0.000379275	-62.4019
chr11	63899612	63899612	-	6.25188e-05	0.0115775	50.2703
chr11	64011938	64011938	+	3.62553e-07	0.000534914	56.5217
chr11	64019697	64019697	+	1.13369e-07	0.000262744	54.3295
chr11	64196257	64196257	-	3.11837e-05	0.00774902	-50.8403
chr11	64241426	64241426	-	6.44483e-07	0.000759753	-61.9883
chr11	64319147	64319147	+	2.19706e-11	9.06243e-07	53.0888
chr11	64380206	64380206	+	3.09821e-07	0.000487505	51.1628
chr11	64560228	64560228	+	4.64128e-07	0.000621508	58.5366
chr11	64585826	64585826	-	1.15387e-09	1.40113e-05	-51.6129
chr11	65052808	65052808	+	8.84078e-09	5.28218e-05	56.0237
chr11	65272979	65272979	-	1.01148e-06	0.00100659	51.5357
chr11	65447716	65447716	+	8.06818e-05	0.0134028	50.3695
chr11	65471259	65471259	+	8.30691e-06	0.00355651	-51.2281
chr11	65511410	65511410	+	1.39679e-05	0.0048335	-56.5789
chr11	65545114	65545114	+	1.13063e-06	0.00107744	57.8215
chr11	65700885	65700885	-	8.35763e-06	0.00356948	-57.9023
chr11	67498099	67498099	-	9.92249e-07	0.000993723	52.5253
chr11	67873876	67873876	-	3.34052e-05	0.00806667	50.625
chr11	68025744	68025744	-	1.15491e-05	0.00432212	63.3333
chr11	68039493	68039493	+	6.70167e-09	4.46528e-05	58.0529
chr11	68090969	68090969	+	2.89341e-07	0.000467693	-67.5926
chr11	68148065	68148065	-	5.3487e-07	0.000679857	-51.4286
chr11	68336561	68336561	+	1.70879e-05	0.00545203	51.2066
chr11	68379664	68379664	-	1.72666e-07	0.000340599	50.0898
chr11	68496023	68496023	-	0.000353328	0.0307578	53.4965
chr11	68497051	68497051	-	9.2022e-10	1.21633e-05	-65.9574
chr11	69171205	69171205	-	2.45889e-05	0.00673696	-54.454
chr11	70057270	70057270	+	4.63076e-06	0.00253456	-54.5455
chr11	70071499	70071499	-	3.71539e-08	0.00013199	-56.3417
chr11	70788069	70788069	+	2.23441e-08	9.48972e-05	-57.6923
chr11	70807995	70807995	+	1.3868e-07	0.000297413	-55
chr11	71476232	71476232	-	6.32623e-07	0.000752498	-52.2222
chr11	71739966	71739966	+	6.94966e-05	0.0123068	-52.1739
chr11	71767045	71767045	-	3.31009e-09	2.77826e-05	-59.9856
chr11	71840373	71840373	+	1.40468e-05	0.00485083	52.1073
chr11	71929280	71929280	-	1.56955e-06	0.00131425	-55
chr11	72058740	72058740	-	1.95817e-10	4.33339e-06	-55.0224
chr11	72068175	72068175	+	2.58764e-05	0.00694487	52.1739
chr11	72084882	72084882	+	0.000272209	0.0265419	-50.6667
chr11	72096656	72096656	-	5.46705e-07	0.000687702	55.4348
chr11	72163644	72163644	+	3.80709e-06	0.00225274	-63.0952
chr11	72226535	72226535	-	1.27015e-06	0.00115397	-53.8462
chr11	72528726	72528726	-	1.03025e-05	0.0040418	58.2707
chr11	72528823	72528823	+	3.8233e-07	0.000554183	-61.603
chr11	72540785	72540785	+	2.59137e-06	0.00178252	-56.5517
chr11	73365429	73365429	-	2.03641e-10	4.40559e-06	72.7273
chr11	75375871	75375871	-	2.20871e-05	0.00634334	-50.6878
chr11	75885535	75885535	+	4.97303e-10	8.14803e-06	-76.5086
chr11	75914741	75914741	-	1.52466e-08	7.50414e-05	51.3514
chr11	76251350	76251350	-	7.91643e-08	0.00021022	-56.7568
chr11	76273941	76273941	-	4.85187e-06	0.00260516	-53.3333
chr11	76285548	76285548	+	3.79714e-07	0.000551478	-54.8644
chr11	76306423	76306423	-	8.3827e-05	0.0137165	-50.404
chr11	76314527	76314527	+	5.75034e-07	0.000709058	59.0517
chr11	76331594	76331594	-	6.01817e-06	0.00295411	-54.4061
chr11	76342060	76342060	+	7.25106e-07	0.000816079	-54.5455
chr11	76342187	76342187	-	2.81738e-06	0.00187461	-57.5658
chr11	76576370	76576370	-	1.39553e-06	0.00122261	-57.8431
chr11	76606001	76606001	-	3.13004e-07	0.000490536	-64.5161
chr11	76619086	76619086	+	6.50023e-08	0.000185411	52.8131
chr11	76628575	76628575	-	6.13217e-07	0.000738027	-50.3632
chr11	76699060	76699060	+	1.05872e-06	0.00103335	-51.0638
chr11	77920710	77920710	+	2.34977e-06	0.00168563	-55.8559
chr11	77933993	77933993	+	4.6838e-08	0.000150412	54.2857
chr11	78544095	78544095	-	3.08973e-10	5.7868e-06	-56.25
chr11	78762009	78762009	-	3.78994e-07	0.00055081	55.2632
chr11	78764317	78764317	+	1.02709e-07	0.00024762	59.2912
chr11	78812107	78812107	+	6.92302e-06	0.0032028	-55.3476
chr11	78843947	78843947	-	1.55923e-06	0.00130757	-54.0517
chr11	79728692	79728692	-	9.78914e-08	0.00024077	65.614
chr11	79779637	79779637	-	5.35354e-09	3.90312e-05	56.2928
chr11	79912462	79912462	-	7.31213e-07	0.000820252	55.1233
chr11	79912812	79912812	+	1.94073e-05	0.00587049	-52.1739
chr11	80310587	80310587	-	2.90764e-06	0.00191424	51.6667
chr11	80310589	80310589	-	6.53767e-08	0.000186051	63.2902
chr11	80735021	80735021	+	4.74111e-09	3.58115e-05	60.7792
chr11	80820518	80820518	-	1.82226e-07	0.000352858	-55.7416
chr11	81273127	81273127	-	1.43253e-05	0.00490928	52.451
chr11	81357748	81357748	+	2.80623e-06	0.00187149	60
chr11	81357750	81357750	+	7.43447e-06	0.00333717	63.9394
chr11	81371645	81371645	+	6.53923e-06	0.00309854	-58.9286
chr11	81407238	81407238	+	3.38433e-05	0.00812988	55.2174
chr11	81507975	81507975	+	2.3205e-08	9.7615e-05	55.4557
chr11	81590649	81590649	+	8.60114e-09	5.20616e-05	58.2805
chr11	81717617	81717617	+	1.50475e-05	0.00507079	51.5152
chr11	81914778	81914778	+	1.07542e-05	0.00414271	-54.809
chr11	82090404	82090404	-	1.98416e-07	0.000371329	61.2576
chr11	82183638	82183638	-	3.94184e-06	0.00229738	-55.2083
chr11	82239060	82239060	+	8.41567e-08	0.000218711	70.5742
chr11	82448097	82448097	+	4.05083e-06	0.0023363	51.4205
chr11	82520024	82520024	-	7.90809e-09	4.95152e-05	59.2105
chr11	82581949	82581949	+	1.17671e-07	0.000269264	-60.7353
chr11	82625436	82625436	-	1.19491e-05	0.0044168	-54.1209
chr11	82626011	82626011	-	2.21003e-06	0.00162322	-60.5991
chr11	82971959	82971959	-	3.13723e-07	0.000491094	-60.7656
chr11	83021304	83021304	+	3.38877e-07	0.000512865	60.5128
chr11	83197556	83197556	+	1.69394e-06	0.00137989	-57.1429
chr11	83450085	83450085	+	6.86935e-08	0.000192405	-56.1905
chr11	84031778	84031778	-	1.51069e-06	0.00128211	50.542
chr11	84432708	84432708	+	1.5191e-08	7.49412e-05	-69.0805
chr11	84533276	84533276	+	1.36725e-06	0.00120863	50.6122
chr11	84539695	84539695	+	0.000372522	0.0316433	-52.1818
chr11	84571759	84571759	+	1.42264e-05	0.00488596	53.7296
chr11	84586550	84586550	+	4.13309e-05	0.00911211	-50.1684
chr11	84631755	84631755	-	3.7076e-07	0.000542263	60.3571
chr11	84636617	84636617	+	8.99701e-07	0.000934584	50.907
chr11	84636695	84636695	+	4.51472e-07	0.000611058	52.1164
chr11	84700626	84700626	+	5.55106e-06	0.00281574	51.3621
chr11	84792108	84792108	+	3.53927e-06	0.00215664	50.8333
chr11	84972166	84972166	-	2.74652e-07	0.000453013	-52.1739
chr11	85473809	85473809	+	1.28948e-07	0.000284289	60.6061
chr11	85734496	85734496	+	2.2644e-06	0.00164615	-61.7143
chr11	85735405	85735405	+	1.51008e-07	0.000315304	54.1667
chr11	85834487	85834487	+	6.26085e-06	0.00302301	-51.4286
chr11	85840369	85840369	-	1.53561e-06	0.00129503	55.1074
chr11	86394136	86394136	+	3.06616e-07	0.000484711	-53.2733
chr11	86575942	86575942	-	1.45041e-10	3.4474e-06	64.2477
chr11	86910134	86910134	+	1.15291e-07	0.00026569	-58.0952
chr11	86951463	86951463	-	5.33267e-08	0.000163918	-63.6097
chr11	86952346	86952346	-	1.28486e-06	0.00115978	52
chr11	87269580	87269580	+	2.96668e-06	0.00193789	54.1667
chr11	87540482	87540482	+	9.43384e-09	5.51906e-05	-53.8462
chr11	88172765	88172765	-	2.29611e-06	0.00166044	-50.7509
chr11	88293019	88293019	+	1.27907e-09	1.49164e-05	61.8826
chr11	88304516	88304516	+	1.80911e-06	0.00143698	55.4902
chr11	88362949	88362949	-	4.47771e-11	1.50689e-06	50.6944
chr11	88366774	88366774	+	3.62556e-07	0.000534914	52.0077
chr11	88377587	88377587	+	7.65896e-08	0.000206278	59.2742
chr11	88520725	88520725	+	2.24195e-10	4.69745e-06	58.8235
chr11	88634499	88634499	+	4.89683e-06	0.00262008	53.5484
chr11	88663962	88663962	+	1.09985e-06	0.00105877	59.4595
chr11	88878239	88878239	-	7.83322e-07	0.000855794	-59.0909
chr11	89262589	89262589	+	4.44423e-09	3.41144e-05	64.742
chr11	89399367	89399367	-	1.41017e-07	0.000300681	-63.8333
chr11	89654549	89654549	+	4.53372e-06	0.00249796	52.276
chr11	89751397	89751397	+	0.000132938	0.0178278	-53.8961
chr11	89818430	89818430	-	2.64742e-09	2.40979e-05	-73.7436
chr11	90077399	90077399	+	0.000186073	0.0215424	50.2315
chr11	90319690	90319690	+	4.72155e-05	0.0098384	-55.0398
chr11	90362869	90362869	+	1.72805e-07	0.000340684	-66.6667
chr11	90367265	90367265	-	4.67078e-05	0.00976516	51.9608
chr11	90444307	90444307	+	3.1522e-06	0.00200117	-60.5714
chr11	90812834	90812834	-	1.4335e-08	7.23624e-05	66.6667
chr11	90915853	90915853	-	4.1266e-06	0.00236229	-60.1683
chr11	91653975	91653975	-	4.75841e-05	0.00988177	54.6703
chr11	92758925	92758925	-	1.48724e-08	7.39832e-05	-52.7789
chr11	92964239	92964239	+	1.11026e-06	0.0010656	-53.4359
chr11	92999818	92999818	-	6.73876e-05	0.0120967	56.682
chr11	93287112	93287112	+	8.78434e-05	0.0140952	50.463
chr11	93388409	93388409	-	1.05585e-08	5.90912e-05	-78.1145
chr11	93388411	93388411	-	3.309e-08	0.000123137	-72.7273
chr11	93853842	93853842	+	0.000112757	0.0162549	-50.9881
chr11	94365811	94365811	+	1.19675e-05	0.0044205	54.3573
chr11	94859331	94859331	+	5.74417e-11	1.8286e-06	56.6667
chr11	95099552	95099552	+	7.30121e-08	0.000199943	-51.6129
chr11	95160330	95160330	+	9.17414e-07	0.000945024	52.381
chr11	95174033	95174033	-	2.96169e-06	0.00193659	-60.1881
chr11	95262773	95262773	-	4.33886e-08	0.000144275	53.7037
chr11	95548456	95548456	+	2.44771e-06	0.0017242	-56.746
chr11	95630032	95630032	+	6.3979e-06	0.00306223	59.6154
chr11	95830755	95830755	-	2.41569e-06	0.001711	51.4874
chr11	96127852	96127852	-	8.19239e-06	0.00352827	55.9524
chr11	96681518	96681518	-	9.73792e-07	0.000981577	54.3103
chr11	96696617	96696617	-	2.14116e-08	9.21211e-05	-55.8824
chr11	96737197	96737197	-	6.20578e-05	0.0115462	-53.8953
chr11	96985951	96985951	+	4.97709e-05	0.0101381	-50.9744
chr11	97303596	97303596	-	4.62077e-08	0.000149522	51.3514
chr11	97828794	97828794	+	2.19549e-06	0.00161646	53.8095
chr11	97961040	97961040	+	2.94768e-06	0.00192978	55.1587
chr11	97985002	97985002	-	1.64771e-06	0.00135486	51.5152
chr11	98041396	98041396	-	3.8763e-09	3.08033e-05	61.1498
chr11	98382173	98382173	-	1.53775e-07	0.00031818	60.7143
chr11	99515157	99515157	+	3.7646e-06	0.00223439	-55.3259
chr11	100074610	100074610	-	6.79101e-11	2.03546e-06	-66.6667
chr11	100139345	100139345	+	9.93217e-08	0.000243036	73.0769
chr11	100261555	100261555	+	0.000294322	0.027739	-53.5714
chr11	100558493	100558493	+	3.4206e-08	0.000125815	52.8249
chr11	100634221	100634221	+	3.59801e-05	0.00841345	51.7241
chr11	100822094	100822094	+	3.4596e-05	0.00822661	-57.4194
chr11	100827317	100827317	+	8.9612e-07	0.000932148	-52.2572
chr11	100889024	100889024	+	7.15809e-10	1.0282e-05	-52.2727
chr11	100889739	100889739	+	3.42337e-05	0.00817992	-50.228
chr11	100919684	100919684	-	2.43019e-06	0.00171647	56.9386
chr11	101381068	101381068	-	9.28175e-06	0.00380205	54.5455
chr11	101527956	101527956	+	1.08242e-07	0.000255783	68.1818
chr11	101602146	101602146	-	5.31e-05	0.0105317	-52
chr11	101915488	101915488	-	2.58885e-08	0.000105322	-52.5735
chr11	102103067	102103067	+	5.78484e-05	0.011068	-56.8841
chr11	102187174	102187174	-	3.77702e-07	0.000549686	60
chr11	102937740	102937740	+	1.416e-08	7.18557e-05	-76.6234
chr11	102958004	102958004	+	6.47764e-08	0.000185088	-55.5556
chr11	103316300	103316300	-	2.04964e-07	0.00037807	51.8519
chr11	103711455	103711455	-	8.34273e-05	0.0136693	51.9104
chr11	104162874	104162874	-	1.00526e-07	0.000244696	53.9018
chr11	104190385	104190385	-	2.59347e-07	0.000437908	50.7994
chr11	104666980	104666980	-	1.81441e-05	0.00565526	-51.9048
chr11	105146626	105146626	+	0.000223849	0.0238336	52.9791
chr11	105374147	105374147	-	3.90628e-07	0.000559965	52.9412
chr11	106305037	106305037	+	4.06479e-07	0.000573993	67.7749
chr11	106432342	106432342	+	6.7826e-06	0.00316367	-63.6364
chr11	107381951	107381951	+	3.31989e-05	0.00803884	-52.1169
chr11	107396986	107396986	+	1.48961e-06	0.0012707	50.0768
chr11	107678905	107678905	-	5.51448e-06	0.00280533	52.8195
chr11	107737343	107737343	+	1.0935e-08	6.03431e-05	74.4019
chr11	107934446	107934446	+	7.17548e-06	0.00327359	55.1724
chr11	107969338	107969338	-	2.11991e-08	9.165e-05	60.7143
chr11	108225869	108225869	+	3.98251e-07	0.000565774	-55.4036
chr11	108497432	108497432	-	2.34719e-07	0.00041202	53.5714
chr11	108797196	108797196	-	2.63497e-06	0.00180117	51.3514
chr11	108897783	108897783	-	3.04981e-10	5.72215e-06	-51.1628
chr11	109005722	109005722	+	8.54134e-05	0.013867	-50.8235
chr11	109559149	109559149	-	3.68476e-06	0.00220722	-52.381
chr11	109562477	109562477	+	1.69818e-05	0.00542882	50.8258
chr11	109892857	109892857	+	2.23311e-06	0.00163392	54.4397
chr11	110113852	110113852	+	1.42489e-07	0.0003024	52.5
chr11	110219613	110219613	-	4.09641e-07	0.000576462	63.0435
chr11	110639606	110639606	-	1.6126e-12	1.36757e-07	66.6667
chr11	110983242	110983242	-	2.23468e-05	0.00638507	56.1275
chr11	112220840	112220840	+	2.8272e-06	0.00187851	56.7568
chr11	112398593	112398593	-	3.16557e-12	2.28281e-07	58.7213
chr11	112602858	112602858	-	7.22196e-07	0.000814186	62.8571
chr11	112994127	112994127	-	9.85439e-05	0.0150461	-53.5809
chr11	113252029	113252029	+	4.33595e-06	0.00243281	51.6827
chr11	113263522	113263522	+	0.00022702	0.0240301	50.0768
chr11	113345322	113345322	+	0.000119307	0.0168042	58.3333
chr11	113503173	113503173	-	9.85573e-06	0.00394072	-52.5203
chr11	113509395	113509395	-	4.74157e-10	7.85376e-06	-62.1212
chr11	113936993	113936993	+	6.14704e-08	0.000178836	-56.4103
chr11	114078415	114078415	+	2.29281e-06	0.00165907	-57.1429
chr11	114173543	114173543	-	2.96883e-05	0.00753525	-57.5448
chr11	114856610	114856610	+	2.24201e-07	0.000400542	55.6061
chr11	114923159	114923159	+	6.28622e-12	3.72713e-07	56.6038
chr11	115165939	115165939	+	2.20033e-05	0.0063323	-61.913
chr11	115249392	115249392	+	7.64685e-08	0.000206278	56.0587
chr11	115334041	115334041	+	2.04509e-07	0.000377427	51.6129
chr11	116454415	116454415	+	5.21357e-06	0.00271389	-51.7241
chr11	116456124	116456124	+	2.10063e-07	0.000385263	61.116
chr11	116481607	116481607	-	2.03239e-08	8.9028e-05	56.25
chr11	116781610	116781610	+	2.93072e-11	1.12523e-06	64.4632
chr11	117199205	117199205	+	5.42769e-07	0.00068497	51.583
chr11	117223228	117223228	-	2.07731e-05	0.00612525	52.0221
chr11	117255744	117255744	-	2.13437e-05	0.00621759	-50.1748
chr11	117357819	117357819	+	3.97866e-08	0.000137433	-58.8235
chr11	117397686	117397686	+	6.94966e-05	0.0123068	-52.1739
chr11	117468661	117468661	-	4.01201e-08	0.000138175	53.8462
chr11	117918412	117918412	-	8.06818e-05	0.0134028	-51.7241
chr11	117935824	117935824	-	2.48054e-05	0.00677746	55.1282
chr11	117975406	117975406	-	7.36044e-06	0.00331505	51.3514
chr11	118079284	118079284	+	3.29984e-05	0.0080095	54.4061
[truncated: 6,240 more rows]

## Sheet: mCHT (= mCCT, mCAT, and mCTT)
CHR	start	end	strand	P value	Q value	% Diff
[truncated: 1,654 more rows]
