# Supplementary material for: Forniceal deep brain stimulation induces gene expression and splicing changes that promote neurogenesis and plasticity
Source: eLife. 2018 Mar 23;7:e34031. doi: 10.7554/eLife.34031 (PMC5906096; doi:10.7554/eLife.34031)
Supplement: Figure 5—source data 3. [file elife-34031-fig5-data3.xlsx]

## Sheet: DBS Rescue in KO_GO
ID	Term	No.ofGenes	PValue	FDR
GO:0044456	synapse part	13	1.07209e-08	7.82833e-06
GO:0045202	synapse	14	1.30472e-08	7.82833e-06
GO:0097458	neuron part	14	4.68107e-06	0.00187243
GO:0005887	integral component of plasma membrane	11	3.89444e-05	0.0110285
GO:0043005	neuron projection	11	5.40253e-05	0.0110285
GO:0098590	plasma membrane region	10	5.62198e-05	0.0110285
GO:0031226	intrinsic component of plasma membrane	11	6.4333e-05	0.0110285
GO:0044459	plasma membrane part	15	7.43112e-05	0.0111467
GO:0097060	synaptic membrane	6	0.000104005	0.0138674
GO:0098793	presynapse	6	0.000237748	0.0285298
